# Supplementary material for: Progression of pathology in PINK1-deficient mouse brain from splicing via ubiquitination, ER stress, and mitophagy changes to neuroinflammation
Source: Springer Nature journal article supplement (doi:10.1186/s12974-017-0928-0), 2017-08-02

## STRING analysis in cerebellum of Pink1<sup>-/-</sup> mice for KEGG pathways >1.5-fold downregulated factors, confidence 0.9, p<0.05

### Age 6 weeks

| Term:                      | p-value  | n |
|----------------------------|----------|---|
| Estrogen signaling pathway | 1,41E-04 | 5 |
| MAPK signaling pathway     | 1,66E-02 | 5 |
| Cocaine addiction          | 2,03E-02 | 3 |
| Legionellosis              | 3,39E-02 | 3 |
| Amphetamine addiction      | 4,36E-02 | 3 |

### Age 6 months

| Term:                                       | p-value  | n  |
|---------------------------------------------|----------|----|
| MAPK signaling pathway                      | 1,46E-03 | 13 |
| Estrogen signaling pathway                  | 2,98E-03 | 8  |
| Dopaminergic synapse                        | 3,08E-03 | 9  |
| Cocaine addiction                           | 4,29E-03 | 6  |
| FoxO signaling pathway                      | 5,41E-03 | 9  |
| TNF signaling pathway                       | 8,24E-03 | 8  |
| Protein processing in endoplasmic reticulum | 2,92E-02 | 9  |

### Age 18 months

| Term:                                       | p-value  | n  |
|---------------------------------------------|----------|----|
| MAPK signaling pathway                      | 7,73E-06 | 36 |
| SNARE interaction in vesicular transport    | 1,31E-04 | 11 |
| Thyroid hormone signaling pathway           | 1,85E-04 | 21 |
| Retrograde endocannabinoid signaling        | 1,30E-03 | 18 |
| Ras signaling pathway                       | 3,29E-03 | 28 |
| Glycerophospholipid metabolism              | 3,94E-03 | 16 |
| Proteoglycans in cancer                     | 7,65E-03 | 27 |
| Neurotrophin signaling pathway              | 9,14E-03 | 18 |
| Rap1 signaling pathway                      | 9,16E-03 | 26 |
| Endocytosis                                 | 9,95E-03 | 26 |
| Protein processing in endoplasmic reticulum | 1,27E-02 | 22 |
| Ubiquitin mediated proteolysis              | 1,96E-02 | 19 |
| Dopaminergic synapse                        | 2,01E-02 | 18 |
| Circadian entrainment                       | 2,34E-02 | 15 |
| Renal cell carcinoma                        | 2,69E-02 | 12 |
| Platelet activation                         | 3,38E-02 | 18 |
| Phosphatidylinositol signaling system       | 4,89E-02 | 13 |

# 6 Weeks

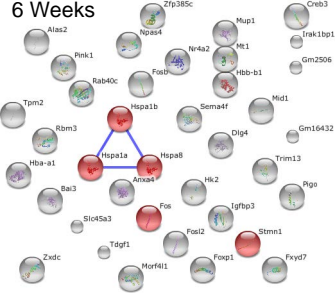

# 6 Months

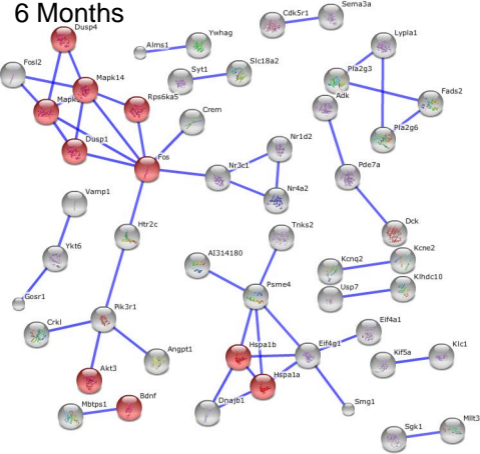



log2 C18M

log2 C6M

log2 C6W

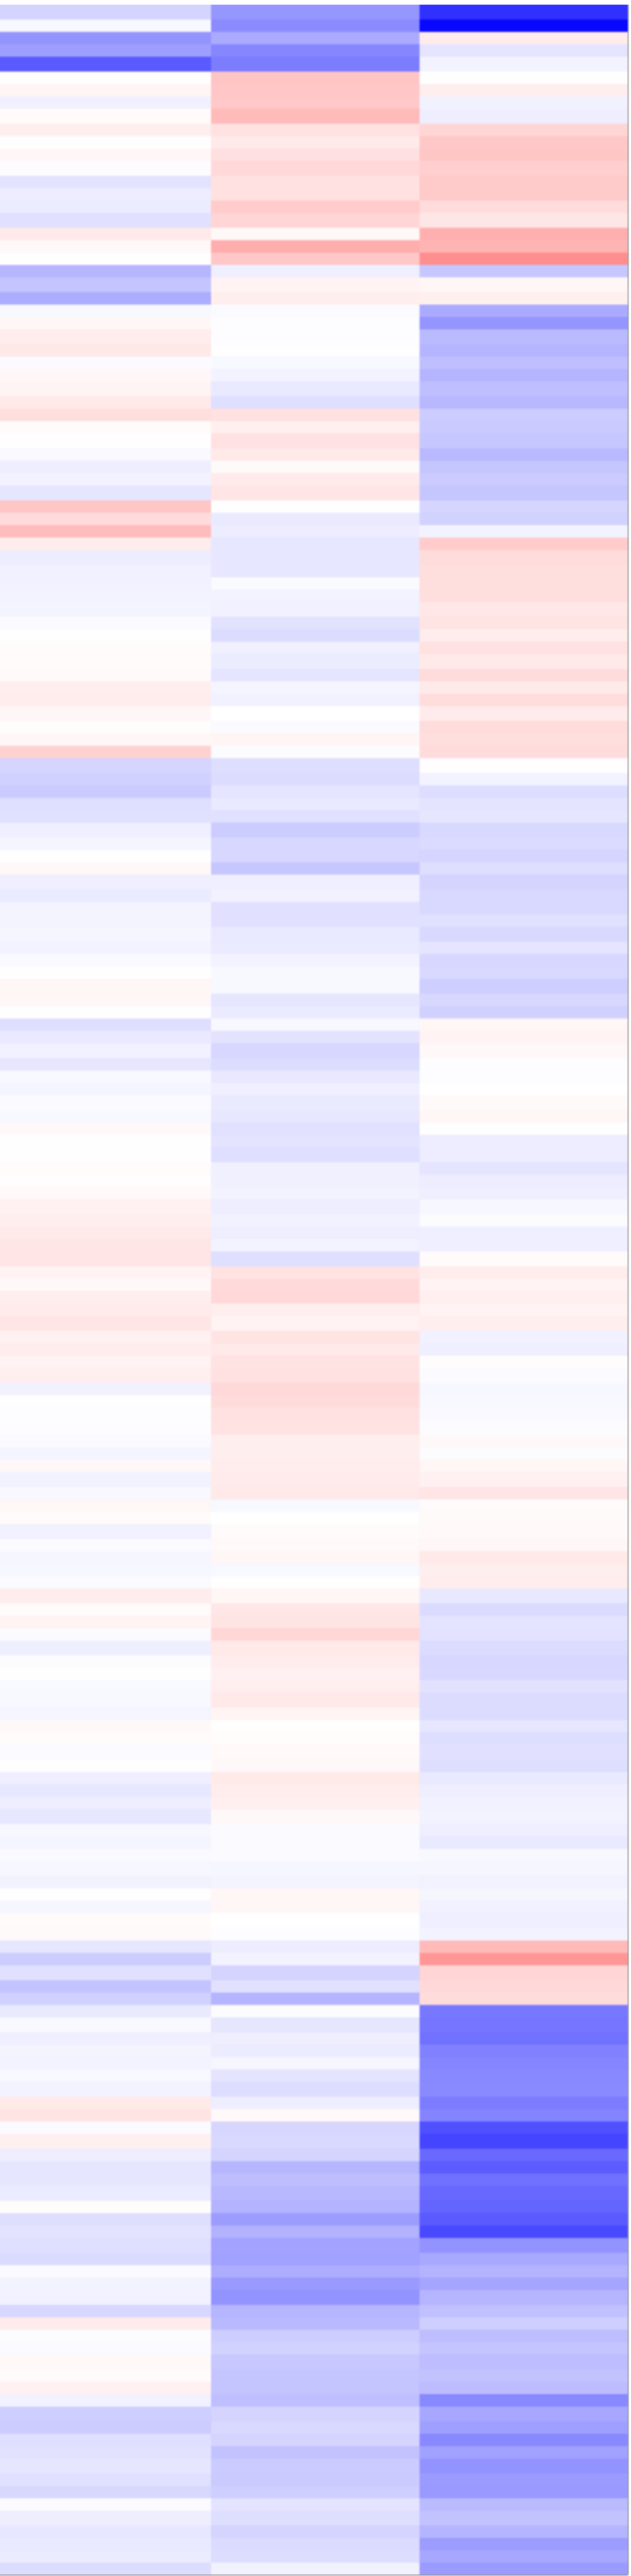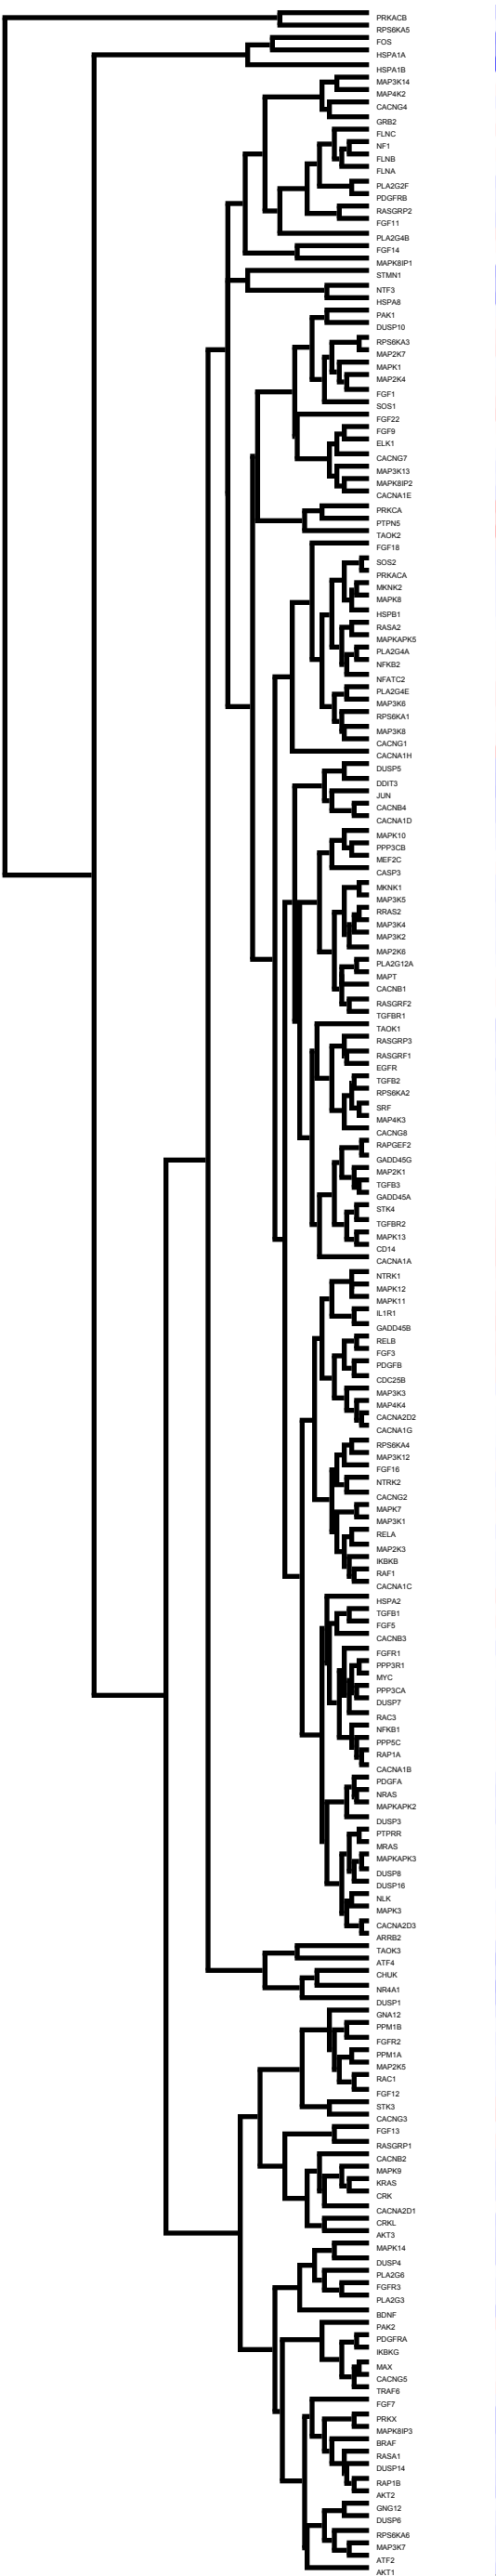

Supplement: MOESM4 [file 12974_2017_928_MOESM4_ESM.pdf]
