# Supplementary material for: Progression of pathology in PINK1-deficient mouse brain from splicing via ubiquitination, ER stress, and mitophagy changes to neuroinflammation
Source: Springer Nature journal article supplement (doi:10.1186/s12974-017-0928-0), 2017-08-02
Supplement: MOESM6 [file 12974_2017_928_MOESM6_ESM.pdf]

**Table: GSEA Results Summary**

|                                   |                                                |
|-----------------------------------|------------------------------------------------|
| Dataset                           | GSEA_18M_collapsed                             |
| Phenotype                         | NoPhenotypeAvailable                           |
| Upregulated in class              | na_neg                                         |
| GeneSet                           | KEGG_SNARE_INTERACTIONS_IN_VESICULAR_TRANSPORT |
| Enrichment Score (ES)             | -0.66728276                                    |
| Normalized Enrichment Score (NES) | -1.7324626                                     |
| Nominal p-value                   | 0.0                                            |
| FDR q-value                       | 0.06256143                                     |
| FWER p-Value                      | 0.063                                          |

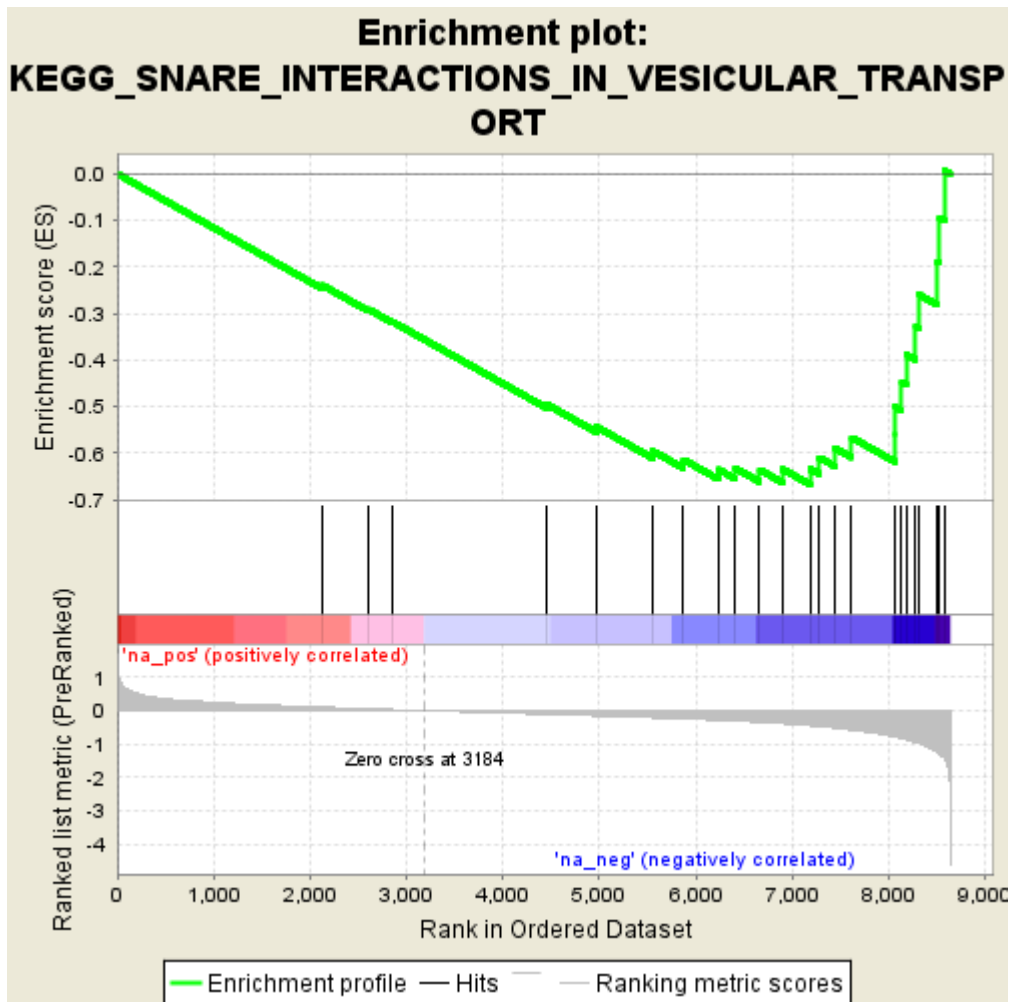

**Fig 1: Enrichment plot: KEGG\_SNARE\_INTERACTIONS\_IN\_VESICULAR\_TRANSPORT**  
**Profile of the Running ES Score & Positions of GeneSet Members on the Rank Ordered List**

**Table: GSEA details [plain text format]**

|    | PROBE                  | GENE SYMBOL                                                  | GENE_TITLE                                                             | RANK IN GENE LIST | RANK METRIC SCORE | RUNNING ES | CORE ENRICHMENT |
|----|------------------------|--------------------------------------------------------------|------------------------------------------------------------------------|-------------------|-------------------|------------|-----------------|
| 1  | <a href="#">VAMP5</a>  | VAMP5<br><a href="#">Entrez</a> ,<br><a href="#">Source</a>  | vesicle-associated membrane protein 5 (myobrevin)                      | 2125              | 0.101             | -0.2392    | No              |
| 2  | <a href="#">STX12</a>  | STX12<br><a href="#">Entrez</a> ,<br><a href="#">Source</a>  | syntaxin 12                                                            | 2605              | 0.052             | -0.2909    | No              |
| 3  | <a href="#">STX8</a>   | STX8<br><a href="#">Entrez</a> ,<br><a href="#">Source</a>   | syntaxin 8                                                             | 2860              | 0.028             | -0.3183    | No              |
| 4  | <a href="#">STX1A</a>  | STX1A<br><a href="#">Entrez</a> ,<br><a href="#">Source</a>  | syntaxin 1A (brain)                                                    | 4451              | -0.109            | -0.4948    | No              |
| 5  | <a href="#">VTI1B</a>  | VTI1B<br><a href="#">Entrez</a> ,<br><a href="#">Source</a>  | vesicle transport through interaction with t-SNAREs homolog 1B (yeast) | 4971              | -0.156            | -0.5434    | No              |
| 6  | <a href="#">VAMP4</a>  | VAMP4<br><a href="#">Entrez</a> ,<br><a href="#">Source</a>  | vesicle-associated membrane protein 4                                  | 5554              | -0.210            | -0.5953    | No              |
| 7  | <a href="#">SNAP23</a> | SNAP23<br><a href="#">Entrez</a> ,<br><a href="#">Source</a> | synaptosomal-associated protein, 23kDa                                 | 5870              | -0.243            | -0.6138    | No              |
| 8  | <a href="#">SEC22B</a> | SEC22B<br><a href="#">Entrez</a> ,<br><a href="#">Source</a> | SEC22 vesicle trafficking protein homolog B (S. cerevisiae)            | 6233              | -0.284            | -0.6347    | No              |
| 9  | <a href="#">SNAP25</a> | SNAP25<br><a href="#">Entrez</a> ,<br><a href="#">Source</a> | synaptosomal-associated protein, 25kDa                                 | 6408              | -0.306            | -0.6321    | No              |
| 10 | <a href="#">VAMP8</a>  | VAMP8<br><a href="#">Entrez</a> ,<br><a href="#">Source</a>  | vesicle-associated membrane protein 8 (endobrevin)                     | 6661              | -0.346            | -0.6356    | Yes             |
| 11 | <a href="#">BNIP1</a>  | BNIP1<br><a href="#">Entrez</a> ,<br><a href="#">Source</a>  | BCL2/adenovirus E1B 19kDa interacting protein 1                        | 6899              | -0.388            | -0.6342    | Yes             |
| 12 | <a href="#">STX3</a>   | STX3<br><a href="#">Entrez</a> ,<br><a href="#">Source</a>   | syntaxin 3                                                             | 7185              | -0.449            | -0.6339    | Yes             |
| 13 | <a href="#">STX17</a>  | STX17<br><a href="#">Entrez</a> ,<br><a href="#">Source</a>  | syntaxin 17                                                            | 7278              | -0.474            | -0.6092    | Yes             |
| 14 | <a href="#">BET1</a>   | BET1<br><a href="#">Entrez</a> ,<br><a href="#">Source</a>   | BET1 homolog (S. cerevisiae)                                           | 7442              | -0.521            | -0.5893    | Yes             |
| 15 | <a href="#">STX18</a>  | STX18<br><a href="#">Entrez</a> ,<br><a href="#">Source</a>  | syntaxin 18                                                            | 7614              | -0.576            | -0.5663    | Yes             |

|    |                        |                                                                              |                                                                        |      |        |         |     |
|----|------------------------|------------------------------------------------------------------------------|------------------------------------------------------------------------|------|--------|---------|-----|
| 16 | <a href="#">GOSR1</a>  | <a href="#">GOSR1</a><br><a href="#">Entrez</a> ,<br><a href="#">Source</a>  | golgi SNAP receptor complex member 1                                   | 8064 | -0.790 | -0.5595 | Yes |
| 17 | <a href="#">STX6</a>   | <a href="#">STX6</a><br><a href="#">Entrez</a> ,<br><a href="#">Source</a>   | syntaxin 6                                                             | 8066 | -0.791 | -0.5007 | Yes |
| 18 | <a href="#">GOSR2</a>  | <a href="#">GOSR2</a><br><a href="#">Entrez</a> ,<br><a href="#">Source</a>  | golgi SNAP receptor complex member 2                                   | 8133 | -0.827 | -0.4468 | Yes |
| 19 | <a href="#">SNAP29</a> | <a href="#">SNAP29</a><br><a href="#">Entrez</a> ,<br><a href="#">Source</a> | synaptosomal-associated protein, 29kDa                                 | 8182 | -0.861 | -0.3882 | Yes |
| 20 | <a href="#">YKT6</a>   | <a href="#">YKT6</a><br><a href="#">Entrez</a> ,<br><a href="#">Source</a>   | YKT6 v-SNARE homolog (S. cerevisiae)                                   | 8279 | -0.946 | -0.3288 | Yes |
| 21 | <a href="#">VTI1A</a>  | <a href="#">VTI1A</a><br><a href="#">Entrez</a> ,<br><a href="#">Source</a>  | vesicle transport through interaction with t-SNAREs homolog 1A (yeast) | 8314 | -0.982 | -0.2597 | Yes |
| 22 | <a href="#">VAMP3</a>  | <a href="#">VAMP3</a><br><a href="#">Entrez</a> ,<br><a href="#">Source</a>  | vesicle-associated membrane protein 3 (cellubrevin)                    | 8501 | -1.238 | -0.1891 | Yes |
| 23 | <a href="#">VAMP2</a>  | <a href="#">VAMP2</a><br><a href="#">Entrez</a> ,<br><a href="#">Source</a>  | vesicle-associated membrane protein 2 (synaptobrevin 2)                | 8526 | -1.314 | -0.0940 | Yes |
| 24 | <a href="#">VAMP1</a>  | <a href="#">VAMP1</a><br><a href="#">Entrez</a> ,<br><a href="#">Source</a>  | vesicle-associated membrane protein 1 (synaptobrevin 1)                | 8580 | -1.433 | 0.0066  | Yes |

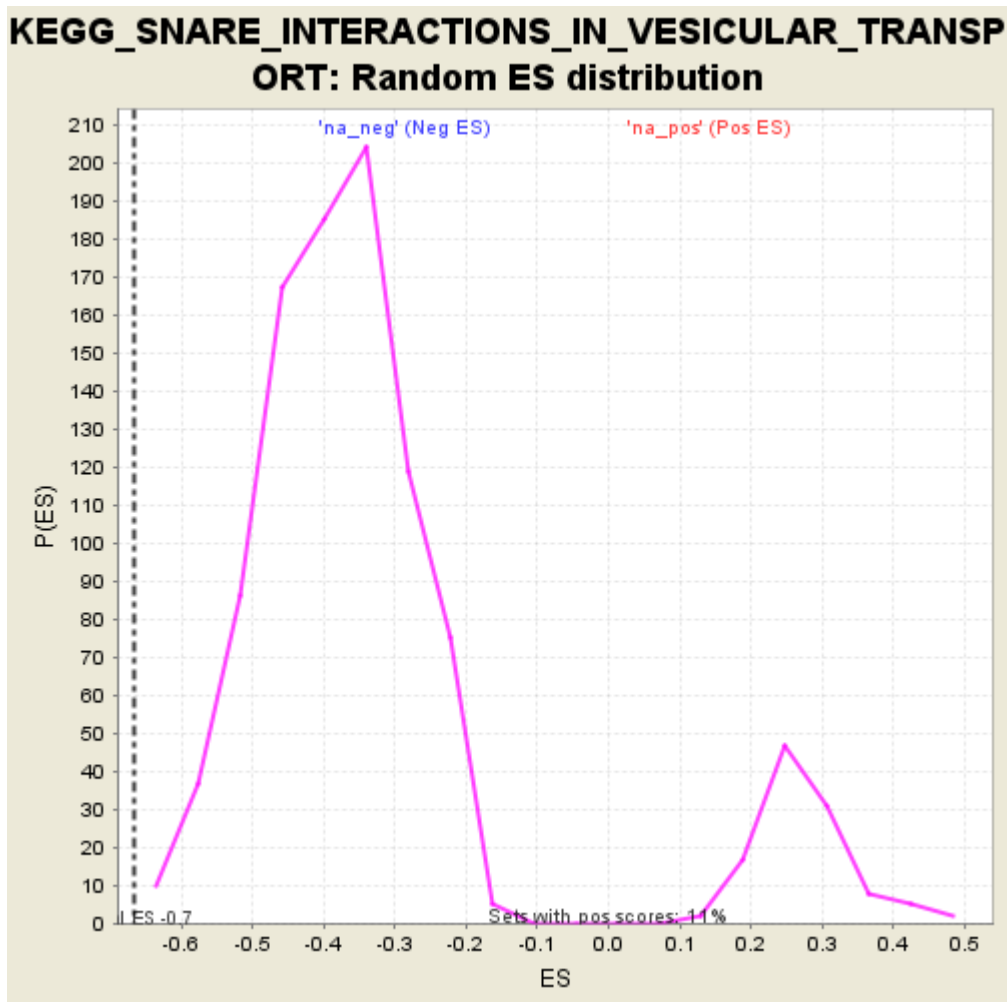

**Fig 2: KEGG\_SNARE\_INTERACTIONS\_IN\_VESICULAR\_TRANSPORT: Random ES distribution**  
**Gene set null distribution of ES for**  
**KEGG\_SNARE\_INTERACTIONS\_IN\_VESICULAR\_TRANSPORT**

**Table: GSEA Results Summary**

|                                   |                             |
|-----------------------------------|-----------------------------|
| Dataset                           | GSEA_18M_collapsed          |
| Phenotype                         | NoPhenotypeAvailable        |
| Upregulated in class              | na_neg                      |
| GeneSet                           | KEGG_MTOR_SIGNALING_PATHWAY |
| Enrichment Score (ES)             | -0.6273622                  |
| Normalized Enrichment Score (NES) | -1.7259375                  |
| Nominal p-value                   | 0.0010660981                |
| FDR q-value                       | 0.035719242                 |
| FWER p-Value                      | 0.072                       |

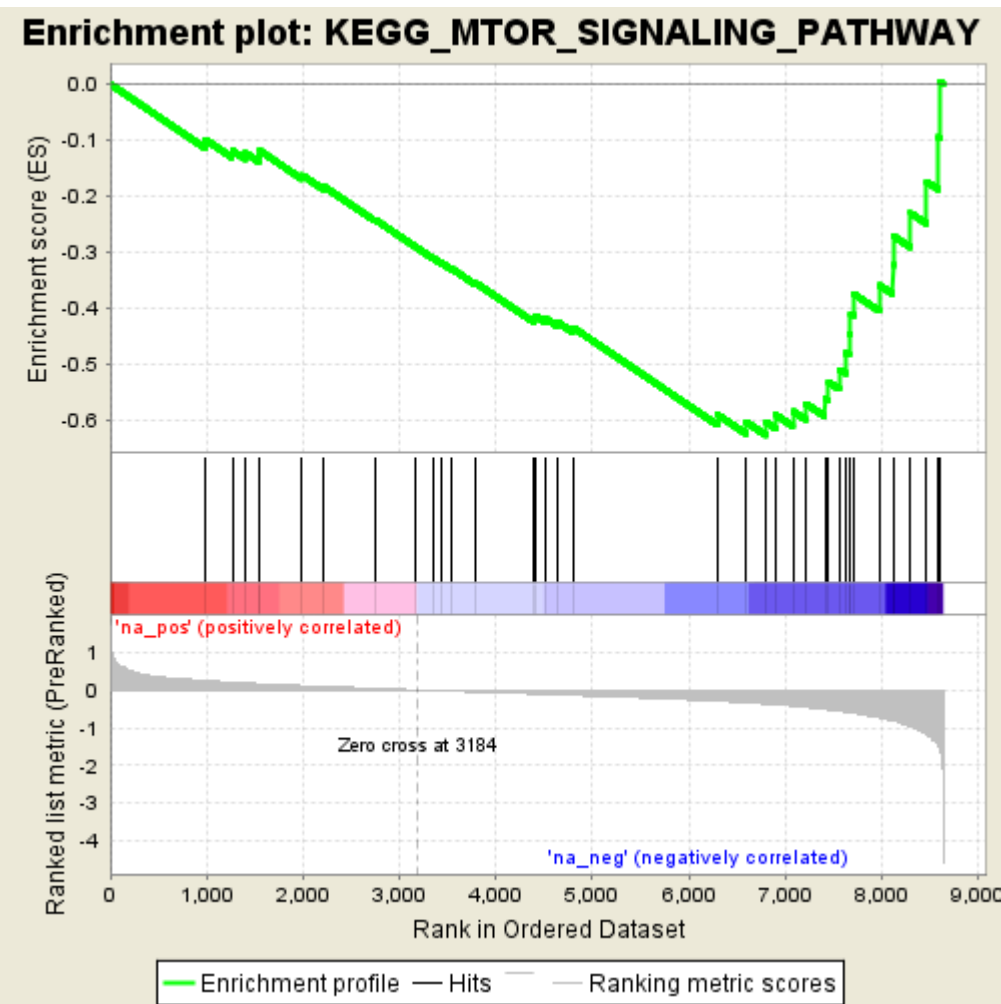

**Fig 1: Enrichment plot: KEGG\_MTOR\_SIGNALING\_PATHWAY**  
**Profile of the Running ES Score & Positions of GeneSet Members on the Rank Ordered List**

**Table: GSEA details [\[plain text format\]](#)**

| PROBE | GENE | GENE_TITLE | RANK | RANK | RUNNING | CORE |
|-------|------|------------|------|------|---------|------|
|-------|------|------------|------|------|---------|------|

|    |                         | SYMBOL                                    |                                                                             | IN GENE LIST | METRIC SCORE | ES      | ENRICHMENT |
|----|-------------------------|-------------------------------------------|-----------------------------------------------------------------------------|--------------|--------------|---------|------------|
| 1  | <a href="#">FIGF</a>    | FIGF<br><a href="#">Entrez, Source</a>    | c-fos induced growth factor (vascular endothelial growth factor D)          | 984          | 0.246        | -0.0988 | No         |
| 2  | <a href="#">PIK3CD</a>  | PIK3CD<br><a href="#">Entrez, Source</a>  | phosphoinositide-3-kinase, catalytic, delta polypeptide                     | 1265         | 0.200        | -0.1186 | No         |
| 3  | <a href="#">PIK3R5</a>  | PIK3R5<br><a href="#">Entrez, Source</a>  | phosphoinositide-3-kinase, regulatory subunit 5, p101                       | 1401         | 0.182        | -0.1227 | No         |
| 4  | <a href="#">RPS6KA1</a> | RPS6KA1<br><a href="#">Entrez, Source</a> | ribosomal protein S6 kinase, 90kDa, polypeptide 1                           | 1540         | 0.165        | -0.1283 | No         |
| 5  | <a href="#">RPS6KB2</a> | RPS6KB2<br><a href="#">Entrez, Source</a> | ribosomal protein S6 kinase, 70kDa, polypeptide 2                           | 1550         | 0.164        | -0.1188 | No         |
| 6  | <a href="#">PIK3R2</a>  | PIK3R2<br><a href="#">Entrez, Source</a>  | phosphoinositide-3-kinase, regulatory subunit 2 (p85 beta)                  | 1989         | 0.114        | -0.1625 | No         |
| 7  | <a href="#">PIK3CG</a>  | PIK3CG<br><a href="#">Entrez, Source</a>  | phosphoinositide-3-kinase, catalytic, gamma polypeptide                     | 2211         | 0.092        | -0.1824 | No         |
| 8  | <a href="#">PGF</a>     | PGF<br><a href="#">Entrez, Source</a>     | placental growth factor, vascular endothelial growth factor-related protein | 2741         | 0.039        | -0.2414 | No         |
| 9  | <a href="#">RPS6KA2</a> | RPS6KA2<br><a href="#">Entrez, Source</a> | ribosomal protein S6 kinase, 90kDa, polypeptide 2                           | 3164         | 0.002        | -0.2904 | No         |
| 10 | <a href="#">PDPK1</a>   | PDPK1<br><a href="#">Entrez, Source</a>   | 3-phosphoinositide dependent protein kinase-1                               | 3347         | -0.015       | -0.3106 | No         |
| 11 | <a href="#">ULK1</a>    | ULK1<br><a href="#">Entrez, Source</a>    | unc-51-like kinase 1 (C. elegans)                                           | 3432         | -0.022       | -0.3190 | No         |
| 12 | <a href="#">DDIT4</a>   | DDIT4<br><a href="#">Entrez, Source</a>   | DNA-damage-inducible transcript 4                                           | 3539         | -0.030       | -0.3294 | No         |
| 13 | <a href="#">RPS6</a>    | RPS6<br><a href="#">Entrez, Source</a>    | ribosomal protein S6                                                        | 3791         | -0.052       | -0.3553 | No         |
| 14 | <a href="#">PRKAA1</a>  | PRKAA1<br><a href="#">Entrez, Source</a>  | protein kinase, AMP-activated, alpha 1 catalytic subunit                    | 4396         | -0.103       | -0.4189 | No         |
| 15 | <a href="#">TSC1</a>    | TSC1<br><a href="#">Entrez, Source</a>    | tuberous sclerosis 1                                                        | 4410         | -0.105       | -0.4138 | No         |
| 16 | <a href="#">MAPK3</a>   | MAPK3<br><a href="#">Entrez, Source</a>   | mitogen-activated protein kinase 3                                          | 4509         | -0.114       | -0.4179 | No         |

|    |                         |                                                                               |                                                                    |      |        |         |     |
|----|-------------------------|-------------------------------------------------------------------------------|--------------------------------------------------------------------|------|--------|---------|-----|
| 17 | <a href="#">PRKAA2</a>  | <a href="#">PRKAA2</a><br><a href="#">Entrez</a> ,<br><a href="#">Source</a>  | protein kinase,<br>AMP-activated, alpha 2<br>catalytic subunit     | 4632 | -0.123 | -0.4242 | No  |
| 18 | <a href="#">RPS6KB1</a> | <a href="#">RPS6KB1</a><br><a href="#">Entrez</a> ,<br><a href="#">Source</a> | ribosomal protein S6 kinase,<br>70kDa, polypeptide 1               | 4796 | -0.138 | -0.4344 | No  |
| 19 | <a href="#">EIF4E2</a>  | <a href="#">EIF4E2</a><br><a href="#">Entrez</a> ,<br><a href="#">Source</a>  | eukaryotic translation<br>initiation factor 4E member 2            | 6298 | -0.292 | -0.5903 | No  |
| 20 | <a href="#">PIK3CB</a>  | <a href="#">PIK3CB</a><br><a href="#">Entrez</a> ,<br><a href="#">Source</a>  | phosphoinositide-3-kinase,<br>catalytic, beta polypeptide          | 6592 | -0.333 | -0.6032 | No  |
| 21 | <a href="#">PIK3CA</a>  | <a href="#">PIK3CA</a><br><a href="#">Entrez</a> ,<br><a href="#">Source</a>  | phosphoinositide-3-kinase,<br>catalytic, alpha polypeptide         | 6801 | -0.370 | -0.6038 | Yes |
| 22 | <a href="#">EIF4E</a>   | <a href="#">EIF4E</a><br><a href="#">Entrez</a> ,<br><a href="#">Source</a>   | eukaryotic translation<br>initiation factor 4E                     | 6901 | -0.388 | -0.5906 | Yes |
| 23 | <a href="#">CAB39</a>   | <a href="#">CAB39</a><br><a href="#">Entrez</a> ,<br><a href="#">Source</a>   | calcium binding protein 39                                         | 7078 | -0.423 | -0.5841 | Yes |
| 24 | <a href="#">PIK3R3</a>  | <a href="#">PIK3R3</a><br><a href="#">Entrez</a> ,<br><a href="#">Source</a>  | phosphoinositide-3-kinase,<br>regulatory subunit 3 (p55,<br>gamma) | 7209 | -0.454 | -0.5703 | Yes |
| 25 | <a href="#">EIF4B</a>   | <a href="#">EIF4B</a><br><a href="#">Entrez</a> ,<br><a href="#">Source</a>   | eukaryotic translation<br>initiation factor 4B                     | 7409 | -0.510 | -0.5610 | Yes |
| 26 | <a href="#">MAPK1</a>   | <a href="#">MAPK1</a><br><a href="#">Entrez</a> ,<br><a href="#">Source</a>   | mitogen-activated protein<br>kinase 1                              | 7446 | -0.522 | -0.5319 | Yes |
| 27 | <a href="#">RPS6KA3</a> | <a href="#">RPS6KA3</a><br><a href="#">Entrez</a> ,<br><a href="#">Source</a> | ribosomal protein S6 kinase,<br>90kDa, polypeptide 3               | 7559 | -0.558 | -0.5093 | Yes |
| 28 | <a href="#">IGF1</a>    | <a href="#">IGF1</a><br><a href="#">Entrez</a> ,<br><a href="#">Source</a>    | insulin-like growth factor 1<br>(somatomedin C)                    | 7626 | -0.580 | -0.4801 | Yes |
| 29 | <a href="#">VEGFC</a>   | <a href="#">VEGFC</a><br><a href="#">Entrez</a> ,<br><a href="#">Source</a>   | vascular endothelial growth<br>factor C                            | 7663 | -0.591 | -0.4466 | Yes |
| 30 | <a href="#">RPS6KA6</a> | <a href="#">RPS6KA6</a><br><a href="#">Entrez</a> ,<br><a href="#">Source</a> | ribosomal protein S6 kinase,<br>90kDa, polypeptide 6               | 7676 | -0.599 | -0.4098 | Yes |
| 31 | <a href="#">CAB39L</a>  | <a href="#">CAB39L</a><br><a href="#">Entrez</a> ,<br><a href="#">Source</a>  | calcium binding protein<br>39-like                                 | 7709 | -0.612 | -0.3746 | Yes |
| 32 | <a href="#">ULK2</a>    | <a href="#">ULK2</a><br><a href="#">Entrez</a> ,<br><a href="#">Source</a>    | unc-51-like kinase 2 (C.<br>elegans)                               | 7975 | -0.729 | -0.3589 | Yes |
| 33 | <a href="#">AKT1</a>    | <a href="#">AKT1</a><br><a href="#">Entrez</a> ,<br><a href="#">Source</a>    | v-akt murine thymoma viral<br>oncogene homolog 1                   | 8115 | -0.817 | -0.3231 | Yes |

|    |                        |                                                                              |                                                                                         |      |        |         |     |
|----|------------------------|------------------------------------------------------------------------------|-----------------------------------------------------------------------------------------|------|--------|---------|-----|
| 34 | <a href="#">AKT2</a>   | <a href="#">AKT2</a><br><a href="#">Entrez</a> ,<br><a href="#">Source</a>   | v-akt murine thymoma viral oncogene homolog 2                                           | 8121 | -0.821 | -0.2713 | Yes |
| 35 | <a href="#">BRAF</a>   | <a href="#">BRAF</a><br><a href="#">Entrez</a> ,<br><a href="#">Source</a>   | v-raf murine sarcoma viral oncogene homolog B1                                          | 8297 | -0.967 | -0.2301 | Yes |
| 36 | <a href="#">PIK3R1</a> | <a href="#">PIK3R1</a><br><a href="#">Entrez</a> ,<br><a href="#">Source</a> | phosphoinositide-3-kinase, regulatory subunit 1 (p85 alpha)                             | 8463 | -1.179 | -0.1741 | Yes |
| 37 | <a href="#">AKT3</a>   | <a href="#">AKT3</a><br><a href="#">Entrez</a> ,<br><a href="#">Source</a>   | v-akt murine thymoma viral oncogene homolog 3 (protein kinase B, gamma)                 | 8586 | -1.473 | -0.0945 | Yes |
| 38 | <a href="#">HIF1A</a>  | <a href="#">HIF1A</a><br><a href="#">Entrez</a> ,<br><a href="#">Source</a>  | hypoxia-inducible factor 1, alpha subunit (basic helix-loop-helix transcription factor) | 8605 | -1.575 | 0.0037  | Yes |

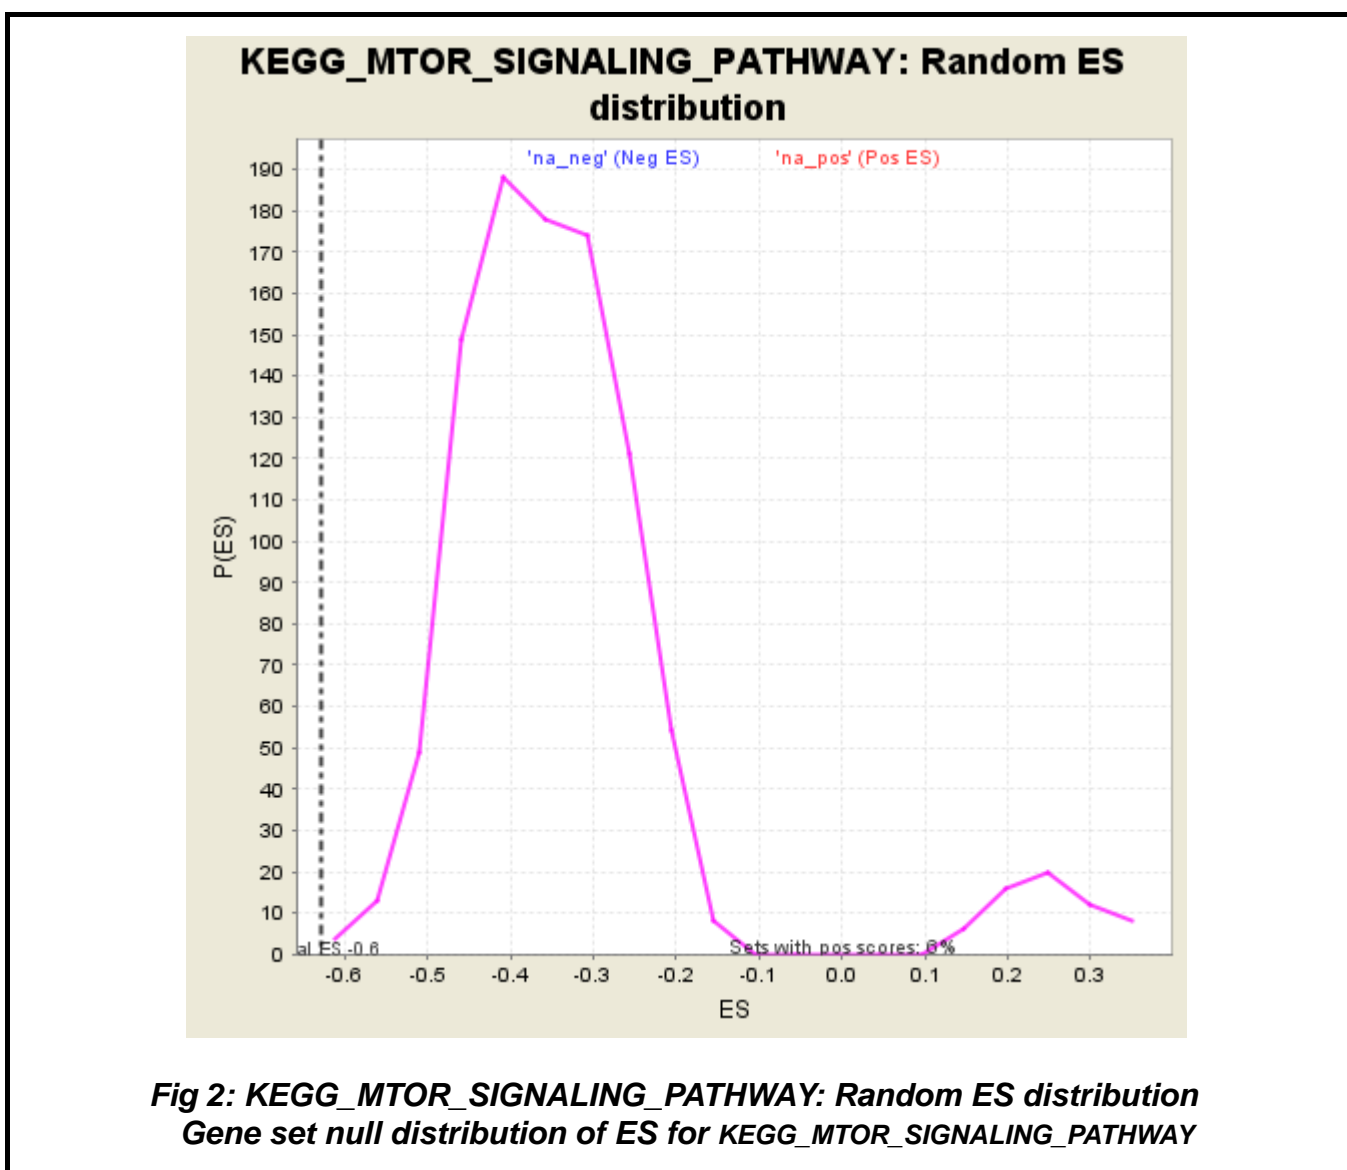

**Fig 2: KEGG\_MTOR\_SIGNALING\_PATHWAY: Random ES distribution**  
**Gene set null distribution of ES for KEGG\_MTOR\_SIGNALING\_PATHWAY**



**Table: GSEA Results Summary**

|                                   |                                              |
|-----------------------------------|----------------------------------------------|
| Dataset                           | GSEA_18M_collapsed                           |
| Phenotype                         | NoPhenotypeAvailable                         |
| Upregulated in class              | na_neg                                       |
| GeneSet                           | KEGG_PROGESTERONE_MEDIATED_OOCYTE_MATURATION |
| Enrichment Score (ES)             | -0.5790663                                   |
| Normalized Enrichment Score (NES) | -1.7147609                                   |
| Nominal p-value                   | 0.0                                          |
| FDR q-value                       | 0.030667158                                  |
| FWER p-Value                      | 0.093                                        |

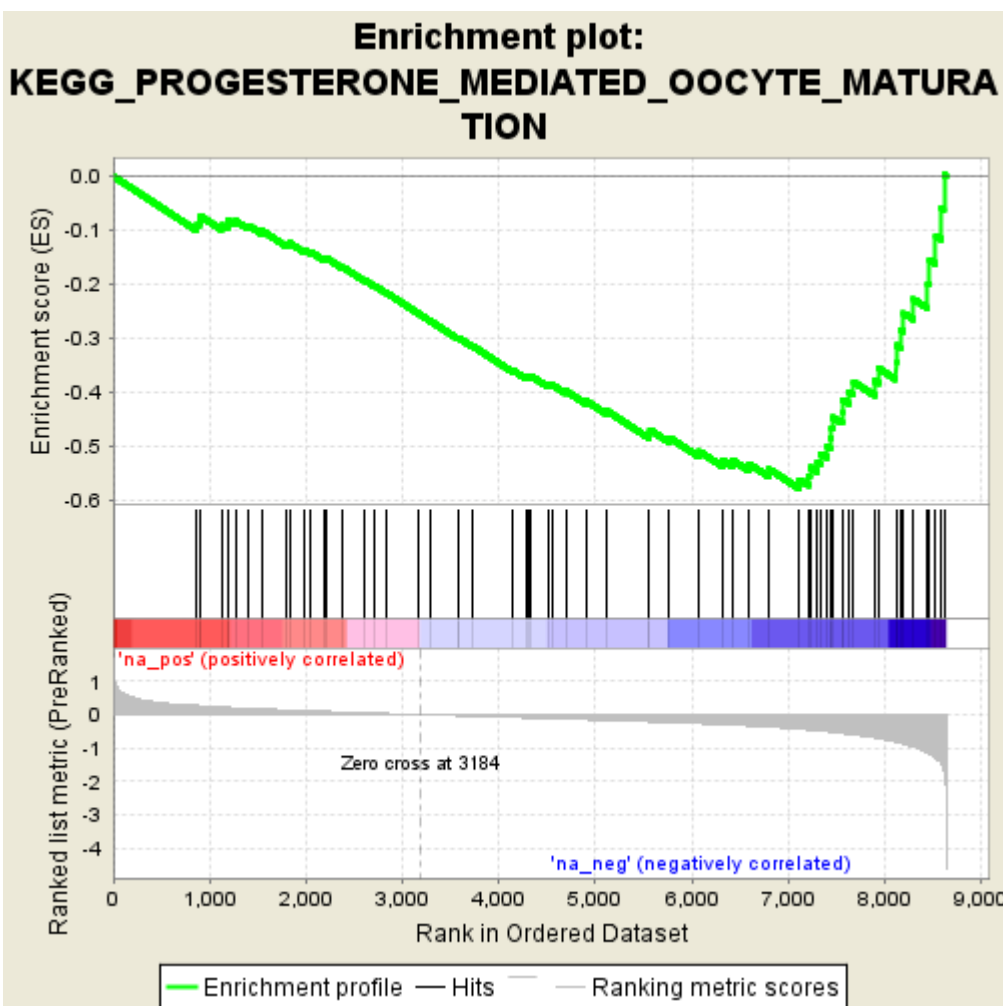

**Fig 1: Enrichment plot: KEGG\_PROGESTERONE\_MEDIATED\_OOCYTE\_MATURATION**

**Profile of the Running ES Score & Positions of GeneSet Members on the Rank Ordered List**

**Table: GSEA details [plain text format]**

|    | PROBE                   | GENE SYMBOL                                                   | GENE_TITLE                                                 | RANK IN GENE LIST | RANK METRIC SCORE | RUNNING ES | CORE ENRICHMENT |
|----|-------------------------|---------------------------------------------------------------|------------------------------------------------------------|-------------------|-------------------|------------|-----------------|
| 1  | <a href="#">ADCY1</a>   | ADCY1<br><a href="#">Entrez</a> ,<br><a href="#">Source</a>   | adenylate cyclase 1 (brain)                                | 868               | 0.269             | -0.0907    | No              |
| 2  | <a href="#">PRKACA</a>  | PRKACA<br><a href="#">Entrez</a> ,<br><a href="#">Source</a>  | protein kinase, cAMP-dependent, catalytic, alpha           | 893               | 0.264             | -0.0831    | No              |
| 3  | <a href="#">MAPK8</a>   | MAPK8<br><a href="#">Entrez</a> ,<br><a href="#">Source</a>   | mitogen-activated protein kinase 8                         | 906               | 0.262             | -0.0742    | No              |
| 4  | <a href="#">IGF1R</a>   | IGF1R<br><a href="#">Entrez</a> ,<br><a href="#">Source</a>   | insulin-like growth factor 1 receptor                      | 1122              | 0.222             | -0.0906    | No              |
| 5  | <a href="#">ADCY5</a>   | ADCY5<br><a href="#">Entrez</a> ,<br><a href="#">Source</a>   | adenylate cyclase 5                                        | 1188              | 0.212             | -0.0899    | No              |
| 6  | <a href="#">CCNA2</a>   | CCNA2<br><a href="#">Entrez</a> ,<br><a href="#">Source</a>   | cyclin A2                                                  | 1192              | 0.212             | -0.0819    | No              |
| 7  | <a href="#">PIK3CD</a>  | PIK3CD<br><a href="#">Entrez</a> ,<br><a href="#">Source</a>  | phosphoinositide-3-kinase, catalytic, delta polypeptide    | 1265              | 0.200             | -0.0825    | No              |
| 8  | <a href="#">PIK3R5</a>  | PIK3R5<br><a href="#">Entrez</a> ,<br><a href="#">Source</a>  | phosphoinositide-3-kinase, regulatory subunit 5, p101      | 1401              | 0.182             | -0.0911    | No              |
| 9  | <a href="#">RPS6KA1</a> | RPS6KA1<br><a href="#">Entrez</a> ,<br><a href="#">Source</a> | ribosomal protein S6 kinase, 90kDa, polypeptide 1          | 1540              | 0.165             | -0.1007    | No              |
| 10 | <a href="#">RAF1</a>    | RAF1<br><a href="#">Entrez</a> ,<br><a href="#">Source</a>    | v-raf-1 murine leukemia viral oncogene homolog 1           | 1794              | 0.134             | -0.1250    | No              |
| 11 | <a href="#">MAPK11</a>  | MAPK11<br><a href="#">Entrez</a> ,<br><a href="#">Source</a>  | mitogen-activated protein kinase 11                        | 1826              | 0.131             | -0.1234    | No              |
| 12 | <a href="#">PIK3R2</a>  | PIK3R2<br><a href="#">Entrez</a> ,<br><a href="#">Source</a>  | phosphoinositide-3-kinase, regulatory subunit 2 (p85 beta) | 1989              | 0.114             | -0.1379    | No              |
| 13 | <a href="#">ADCY6</a>   | ADCY6<br><a href="#">Entrez</a> ,<br><a href="#">Source</a>   | adenylate cyclase 6                                        | 2045              | 0.108             | -0.1400    | No              |
| 14 | <a href="#">MAPK12</a>  | MAPK12<br><a href="#">Entrez</a> ,<br><a href="#">Source</a>  | mitogen-activated protein kinase 12                        | 2182              | 0.095             | -0.1522    | No              |
| 15 | <a href="#">PIK3CG</a>  | PIK3CG<br><a href="#">Entrez</a> ,<br><a href="#">Source</a>  | phosphoinositide-3-kinase, catalytic, gamma polypeptide    | 2211              | 0.092             | -0.1519    | No              |

|    |                          |                                                                |                                                              |      |        |         |    |
|----|--------------------------|----------------------------------------------------------------|--------------------------------------------------------------|------|--------|---------|----|
| 16 | <a href="#">ADCY7</a>    | ADCY7<br><a href="#">Entrez</a> ,<br><a href="#">Source</a>    | adenylate cyclase 7                                          | 2380 | 0.075  | -0.1685 | No |
| 17 | <a href="#">ANAPC4</a>   | ANAPC4<br><a href="#">Entrez</a> ,<br><a href="#">Source</a>   | anaphase promoting complex subunit 4                         | 2608 | 0.052  | -0.1929 | No |
| 18 | <a href="#">ANAPC7</a>   | ANAPC7<br><a href="#">Entrez</a> ,<br><a href="#">Source</a>   | anaphase promoting complex subunit 7                         | 2717 | 0.041  | -0.2039 | No |
| 19 | <a href="#">PDE3B</a>    | PDE3B<br><a href="#">Entrez</a> ,<br><a href="#">Source</a>    | phosphodiesterase 3B, cGMP-inhibited                         | 2834 | 0.030  | -0.2163 | No |
| 20 | <a href="#">RPS6KA2</a>  | RPS6KA2<br><a href="#">Entrez</a> ,<br><a href="#">Source</a>  | ribosomal protein S6 kinase, 90kDa, polypeptide 2            | 3164 | 0.002  | -0.2546 | No |
| 21 | <a href="#">ANAPC2</a>   | ANAPC2<br><a href="#">Entrez</a> ,<br><a href="#">Source</a>   | anaphase promoting complex subunit 2                         | 3291 | -0.010 | -0.2689 | No |
| 22 | <a href="#">CDC25B</a>   | CDC25B<br><a href="#">Entrez</a> ,<br><a href="#">Source</a>   | cell division cycle 25B                                      | 3573 | -0.034 | -0.3004 | No |
| 23 | <a href="#">ADCY2</a>    | ADCY2<br><a href="#">Entrez</a> ,<br><a href="#">Source</a>    | adenylate cyclase 2 (brain)                                  | 3580 | -0.035 | -0.2997 | No |
| 24 | <a href="#">HSP90AA1</a> | HSP90AA1<br><a href="#">Entrez</a> ,<br><a href="#">Source</a> | heat shock protein 90kDa alpha (cytosolic), class A member 1 | 3719 | -0.047 | -0.3140 | No |
| 25 | <a href="#">CDC25A</a>   | CDC25A<br><a href="#">Entrez</a> ,<br><a href="#">Source</a>   | cell division cycle 25A                                      | 4147 | -0.084 | -0.3605 | No |
| 26 | <a href="#">HSP90AB1</a> | HSP90AB1<br><a href="#">Entrez</a> ,<br><a href="#">Source</a> | heat shock protein 90kDa alpha (cytosolic), class B member 1 | 4282 | -0.094 | -0.3724 | No |
| 27 | <a href="#">SPDYA</a>    | SPDYA<br><a href="#">Entrez</a> ,<br><a href="#">Source</a>    | speedy homolog A (Drosophila)                                | 4305 | -0.096 | -0.3712 | No |
| 28 | <a href="#">CPEB1</a>    | CPEB1<br><a href="#">Entrez</a> ,<br><a href="#">Source</a>    | cytoplasmic polyadenylation element binding protein 1        | 4332 | -0.098 | -0.3704 | No |
| 29 | <a href="#">MAPK3</a>    | MAPK3<br><a href="#">Entrez</a> ,<br><a href="#">Source</a>    | mitogen-activated protein kinase 3                           | 4509 | -0.114 | -0.3865 | No |
| 30 | <a href="#">CDC27</a>    | CDC27<br><a href="#">Entrez</a> ,<br><a href="#">Source</a>    | cell division cycle 27                                       | 4553 | -0.117 | -0.3869 | No |
| 31 | <a href="#">MAPK13</a>   | MAPK13<br><a href="#">Entrez</a> ,<br><a href="#">Source</a>   | mitogen-activated protein kinase 13                          | 4691 | -0.129 | -0.3978 | No |
| 32 | <a href="#">CDC16</a>    | CDC16<br><a href="#">Entrez</a> ,<br><a href="#">Source</a>    | CDC16 cell division cycle 16 homolog (S. cerevisiae)         | 4900 | -0.149 | -0.4162 | No |

|    |                        |                                                              |                                                                                         |      |        |         |     |
|----|------------------------|--------------------------------------------------------------|-----------------------------------------------------------------------------------------|------|--------|---------|-----|
| 33 | <a href="#">MAD2L2</a> | MAD2L2<br><a href="#">Entrez</a> ,<br><a href="#">Source</a> | MAD2 mitotic arrest deficient-like 2 (yeast)                                            | 5108 | -0.167 | -0.4338 | No  |
| 34 | <a href="#">MAP2K1</a> | MAP2K1<br><a href="#">Entrez</a> ,<br><a href="#">Source</a> | mitogen-activated protein kinase kinase 1                                               | 5558 | -0.211 | -0.4779 | No  |
| 35 | <a href="#">CCNB2</a>  | CCNB2<br><a href="#">Entrez</a> ,<br><a href="#">Source</a>  | cyclin B2                                                                               | 5560 | -0.211 | -0.4697 | No  |
| 36 | <a href="#">GNAI2</a>  | GNAI2<br><a href="#">Entrez</a> ,<br><a href="#">Source</a>  | guanine nucleotide binding protein (G protein), alpha inhibiting activity polypeptide 2 | 5765 | -0.232 | -0.4844 | No  |
| 37 | <a href="#">PGR</a>    | PGR<br><a href="#">Entrez</a> ,<br><a href="#">Source</a>    | progesterone receptor                                                                   | 6075 | -0.266 | -0.5100 | No  |
| 38 | <a href="#">GNAI3</a>  | GNAI3<br><a href="#">Entrez</a> ,<br><a href="#">Source</a>  | guanine nucleotide binding protein (G protein), alpha inhibiting activity polypeptide 3 | 6319 | -0.295 | -0.5268 | No  |
| 39 | <a href="#">MAPK10</a> | MAPK10<br><a href="#">Entrez</a> ,<br><a href="#">Source</a> | mitogen-activated protein kinase 10                                                     | 6420 | -0.307 | -0.5264 | No  |
| 40 | <a href="#">PIK3CB</a> | PIK3CB<br><a href="#">Entrez</a> ,<br><a href="#">Source</a> | phosphoinositide-3-kinase, catalytic, beta polypeptide                                  | 6592 | -0.333 | -0.5333 | No  |
| 41 | <a href="#">PIK3CA</a> | PIK3CA<br><a href="#">Entrez</a> ,<br><a href="#">Source</a> | phosphoinositide-3-kinase, catalytic, alpha polypeptide                                 | 6801 | -0.370 | -0.5430 | No  |
| 42 | <a href="#">CDC23</a>  | CDC23<br><a href="#">Entrez</a> ,<br><a href="#">Source</a>  | CDC23 (cell division cycle 23, yeast, homolog)                                          | 7111 | -0.429 | -0.5622 | Yes |
| 43 | <a href="#">PIK3R3</a> | PIK3R3<br><a href="#">Entrez</a> ,<br><a href="#">Source</a> | phosphoinositide-3-kinase, regulatory subunit 3 (p55, gamma)                            | 7209 | -0.454 | -0.5557 | Yes |
| 44 | <a href="#">ADCY8</a>  | ADCY8<br><a href="#">Entrez</a> ,<br><a href="#">Source</a>  | adenylate cyclase 8 (brain)                                                             | 7224 | -0.457 | -0.5394 | Yes |
| 45 | <a href="#">BUB1</a>   | BUB1<br><a href="#">Entrez</a> ,<br><a href="#">Source</a>   | BUB1 budding uninhibited by benzimidazoles 1 homolog (yeast)                            | 7300 | -0.479 | -0.5294 | Yes |
| 46 | <a href="#">GNAI1</a>  | GNAI1<br><a href="#">Entrez</a> ,<br><a href="#">Source</a>  | guanine nucleotide binding protein (G protein), alpha inhibiting activity polypeptide 1 | 7333 | -0.488 | -0.5140 | Yes |
| 47 | <a href="#">ANAPC1</a> | ANAPC1<br><a href="#">Entrez</a> ,<br><a href="#">Source</a> | anaphase promoting complex subunit 1                                                    | 7403 | -0.507 | -0.5021 | Yes |
| 48 | <a href="#">ANAPC5</a> | ANAPC5<br><a href="#">Entrez</a> ,<br><a href="#">Source</a> | anaphase promoting complex subunit 5                                                    | 7436 | -0.519 | -0.4855 | Yes |

|    |                         |                                                               |                                                                         |      |        |         |     |
|----|-------------------------|---------------------------------------------------------------|-------------------------------------------------------------------------|------|--------|---------|-----|
| 49 | <a href="#">MAPK1</a>   | MAPK1<br><a href="#">Entrez</a> ,<br><a href="#">Source</a>   | mitogen-activated protein kinase 1                                      | 7446 | -0.522 | -0.4660 | Yes |
| 50 | <a href="#">ADCY3</a>   | ADCY3<br><a href="#">Entrez</a> ,<br><a href="#">Source</a>   | adenylate cyclase 3                                                     | 7460 | -0.528 | -0.4468 | Yes |
| 51 | <a href="#">RPS6KA3</a> | RPS6KA3<br><a href="#">Entrez</a> ,<br><a href="#">Source</a> | ribosomal protein S6 kinase, 90kDa, polypeptide 3                       | 7559 | -0.558 | -0.4363 | Yes |
| 52 | <a href="#">ANAPC10</a> | ANAPC10<br><a href="#">Entrez</a> ,<br><a href="#">Source</a> | anaphase promoting complex subunit 10                                   | 7564 | -0.560 | -0.4148 | Yes |
| 53 | <a href="#">IGF1</a>    | IGF1<br><a href="#">Entrez</a> ,<br><a href="#">Source</a>    | insulin-like growth factor 1 (somatomedin C)                            | 7626 | -0.580 | -0.3992 | Yes |
| 54 | <a href="#">RPS6KA6</a> | RPS6KA6<br><a href="#">Entrez</a> ,<br><a href="#">Source</a> | ribosomal protein S6 kinase, 90kDa, polypeptide 6                       | 7676 | -0.599 | -0.3814 | Yes |
| 55 | <a href="#">FZR1</a>    | FZR1<br><a href="#">Entrez</a> ,<br><a href="#">Source</a>    | fizzy/cell division cycle 20 related 1 (Drosophila)                     | 7896 | -0.694 | -0.3797 | Yes |
| 56 | <a href="#">PRKX</a>    | PRKX<br><a href="#">Entrez</a> ,<br><a href="#">Source</a>    | protein kinase, X-linked                                                | 7937 | -0.713 | -0.3563 | Yes |
| 57 | <a href="#">AKT1</a>    | AKT1<br><a href="#">Entrez</a> ,<br><a href="#">Source</a>    | v-akt murine thymoma viral oncogene homolog 1                           | 8115 | -0.817 | -0.3449 | Yes |
| 58 | <a href="#">AKT2</a>    | AKT2<br><a href="#">Entrez</a> ,<br><a href="#">Source</a>    | v-akt murine thymoma viral oncogene homolog 2                           | 8121 | -0.821 | -0.3133 | Yes |
| 59 | <a href="#">ARAF</a>    | ARAF<br><a href="#">Entrez</a> ,<br><a href="#">Source</a>    | v-raf murine sarcoma 3611 viral oncogene homolog                        | 8164 | -0.845 | -0.2850 | Yes |
| 60 | <a href="#">MAPK14</a>  | MAPK14<br><a href="#">Entrez</a> ,<br><a href="#">Source</a>  | mitogen-activated protein kinase 14                                     | 8194 | -0.875 | -0.2540 | Yes |
| 61 | <a href="#">BRAF</a>    | BRAF<br><a href="#">Entrez</a> ,<br><a href="#">Source</a>    | v-raf murine sarcoma viral oncogene homolog B1                          | 8297 | -0.967 | -0.2280 | Yes |
| 62 | <a href="#">KRAS</a>    | KRAS<br><a href="#">Entrez</a> ,<br><a href="#">Source</a>    | v-Ki-ras2 Kirsten rat sarcoma viral oncogene homolog                    | 8444 | -1.153 | -0.1997 | Yes |
| 63 | <a href="#">PIK3R1</a>  | PIK3R1<br><a href="#">Entrez</a> ,<br><a href="#">Source</a>  | phosphoinositide-3-kinase, regulatory subunit 1 (p85 alpha)             | 8463 | -1.179 | -0.1555 | Yes |
| 64 | <a href="#">MAPK9</a>   | MAPK9<br><a href="#">Entrez</a> ,<br><a href="#">Source</a>   | mitogen-activated protein kinase 9                                      | 8528 | -1.320 | -0.1112 | Yes |
| 65 | <a href="#">AKT3</a>    | AKT3<br><a href="#">Entrez</a> ,<br><a href="#">Source</a>    | v-akt murine thymoma viral oncogene homolog 3 (protein kinase B, gamma) | 8586 | -1.473 | -0.0600 | Yes |

|    |                        |                                                              |                                                       |      |        |        |     |
|----|------------------------|--------------------------------------------------------------|-------------------------------------------------------|------|--------|--------|-----|
| 66 | <a href="#">PRKACB</a> | PRKACB<br><a href="#">Entrez</a> ,<br><a href="#">Source</a> | protein kinase,<br>cAMP-dependent, catalytic,<br>beta | 8614 | -1.677 | 0.0027 | Yes |
|----|------------------------|--------------------------------------------------------------|-------------------------------------------------------|------|--------|--------|-----|

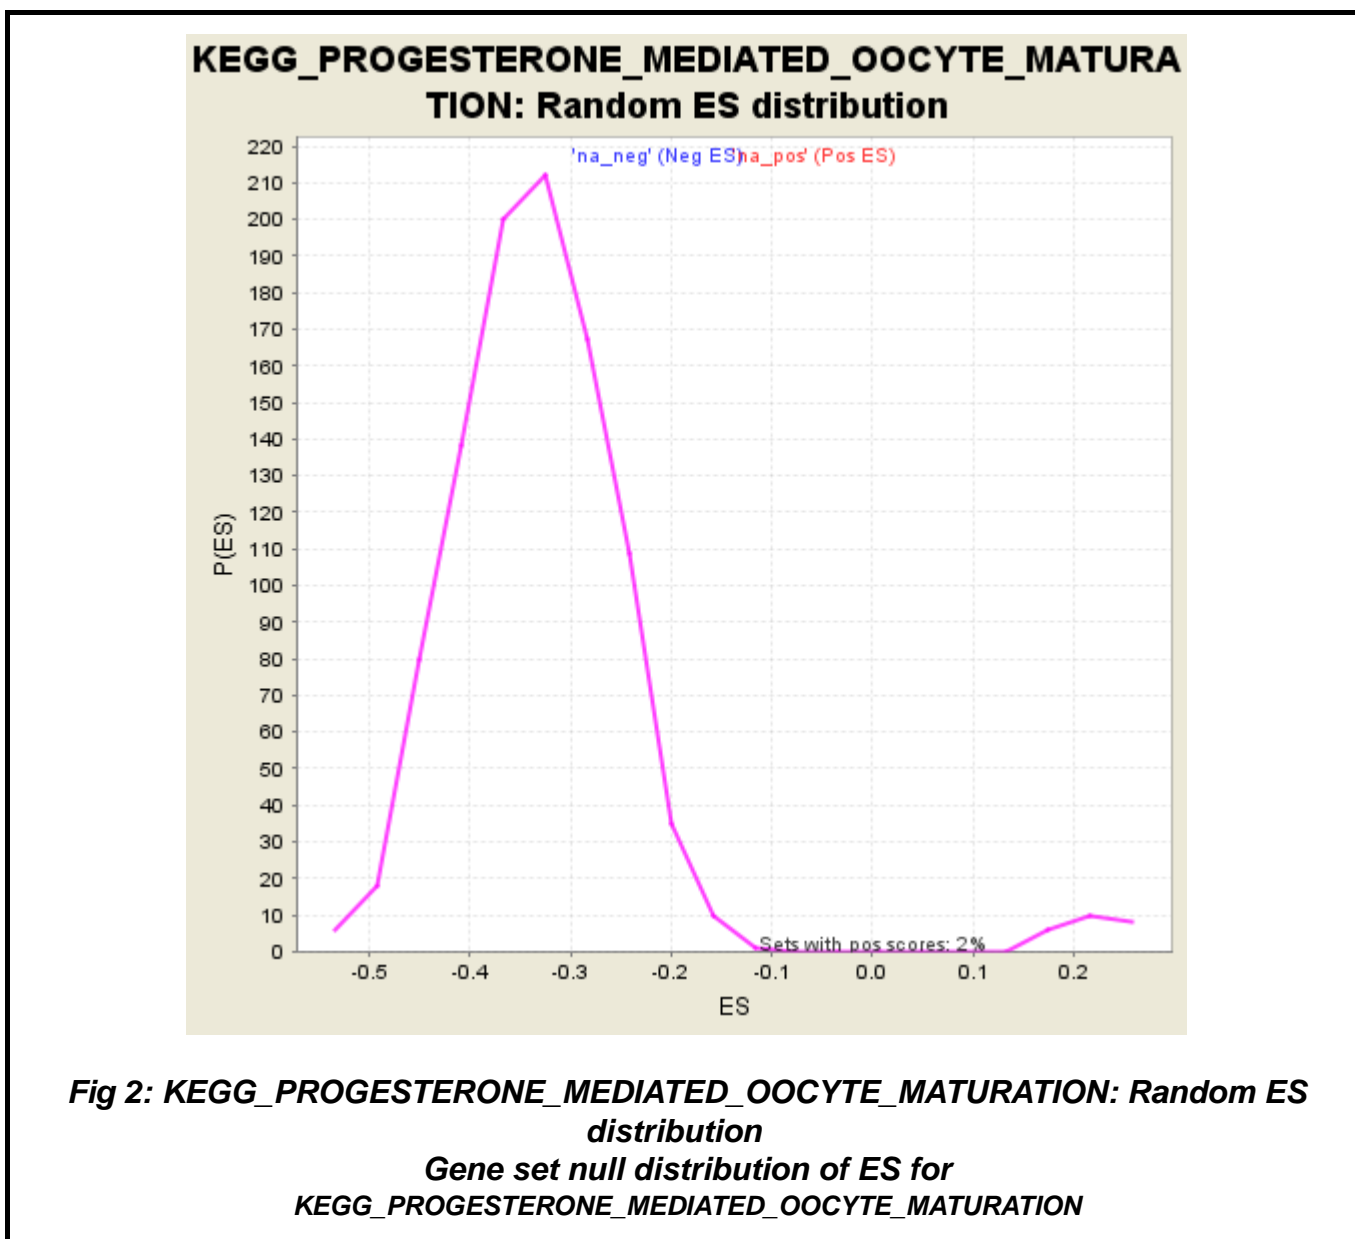

**Table: GSEA Results Summary**

|                                   |                                          |
|-----------------------------------|------------------------------------------|
| Dataset                           | GSEA_18M_collapsed                       |
| Phenotype                         | NoPhenotypeAvailable                     |
| Upregulated in class              | na_neg                                   |
| GeneSet                           | KEGG_NOD_LIKE_RECEPTOR_SIGNALING_PATHWAY |
| Enrichment Score (ES)             | -0.43181878                              |
| Normalized Enrichment Score (NES) | -1.1397108                               |
| Nominal p-value                   | 0.29501083                               |
| FDR q-value                       | 0.49746913                               |
| FWER p-Value                      | 1.0                                      |

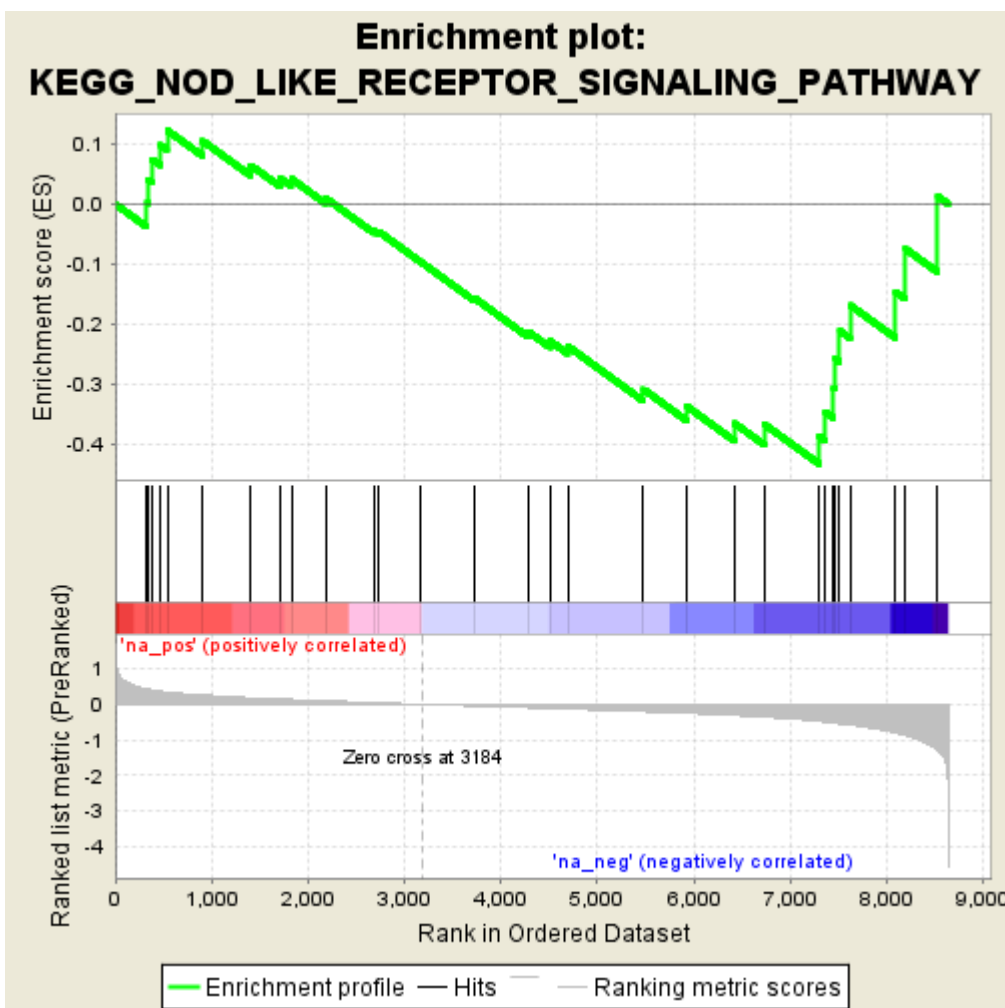

**Fig 1: Enrichment plot: KEGG\_NOD\_LIKE\_RECEPTOR\_SIGNALING\_PATHWAY**  
**Profile of the Running ES Score & Positions of GeneSet Members on the Rank Ordered List**

**Table: GSEA details [\[plain text format\]](#)**

| PROBE | GENE | GENE_TITLE | RANK | RANK | RUNNING | CORE |
|-------|------|------------|------|------|---------|------|
|-------|------|------------|------|------|---------|------|

|    |                          | SYMBOL                                                         |                                                                                                                                         | IN GENE LIST | METRIC SCORE | ES      | ENRICHMENT |
|----|--------------------------|----------------------------------------------------------------|-----------------------------------------------------------------------------------------------------------------------------------------|--------------|--------------|---------|------------|
| 1  | <a href="#">NFKBIA</a>   | NFKBIA<br><a href="#">Entrez</a> ,<br><a href="#">Source</a>   | nuclear factor of kappa light polypeptide gene enhancer in B-cells inhibitor, alpha                                                     | 330          | 0.423        | 0.0020  | No         |
| 2  | <a href="#">TRIP6</a>    | TRIP6<br><a href="#">Entrez</a> ,<br><a href="#">Source</a>    | thyroid hormone receptor interactor 6                                                                                                   | 341          | 0.419        | 0.0408  | No         |
| 3  | <a href="#">PSTPIP1</a>  | PSTPIP1<br><a href="#">Entrez</a> ,<br><a href="#">Source</a>  | proline-serine-threonine phosphatase interacting protein 1                                                                              | 382          | 0.399        | 0.0742  | No         |
| 4  | <a href="#">ERBB2IP</a>  | ERBB2IP<br><a href="#">Entrez</a> ,<br><a href="#">Source</a>  | erb2 interacting protein                                                                                                                | 470          | 0.357        | 0.0981  | No         |
| 5  | <a href="#">CHUK</a>     | CHUK<br><a href="#">Entrez</a> ,<br><a href="#">Source</a>     | conserved helix-loop-helix ubiquitous kinase                                                                                            | 539          | 0.337        | 0.1224  | No         |
| 6  | <a href="#">MAPK8</a>    | MAPK8<br><a href="#">Entrez</a> ,<br><a href="#">Source</a>    | mitogen-activated protein kinase 8                                                                                                      | 906          | 0.262        | 0.1048  | No         |
| 7  | <a href="#">IKBKB</a>    | IKBKB<br><a href="#">Entrez</a> ,<br><a href="#">Source</a>    | inhibitor of kappa light polypeptide gene enhancer in B-cells, kinase beta                                                              | 1403         | 0.181        | 0.0645  | No         |
| 8  | <a href="#">IL18</a>     | IL18<br><a href="#">Entrez</a> ,<br><a href="#">Source</a>     | interleukin 18 (interferon-gamma-inducing factor)                                                                                       | 1714         | 0.145        | 0.0423  | No         |
| 9  | <a href="#">MAPK11</a>   | MAPK11<br><a href="#">Entrez</a> ,<br><a href="#">Source</a>   | mitogen-activated protein kinase 11                                                                                                     | 1826         | 0.131        | 0.0420  | No         |
| 10 | <a href="#">MAPK12</a>   | MAPK12<br><a href="#">Entrez</a> ,<br><a href="#">Source</a>   | mitogen-activated protein kinase 12                                                                                                     | 2182         | 0.095        | 0.0098  | No         |
| 11 | <a href="#">RELA</a>     | RELA<br><a href="#">Entrez</a> ,<br><a href="#">Source</a>     | v-rel reticuloendotheliosis viral oncogene homolog A, nuclear factor of kappa light polypeptide gene enhancer in B-cells 3, p65 (avian) | 2685         | 0.044        | -0.0444 | No         |
| 12 | <a href="#">CCL8</a>     | CCL8<br><a href="#">Entrez</a> ,<br><a href="#">Source</a>     | chemokine (C-C motif) ligand 8                                                                                                          | 2731         | 0.040        | -0.0458 | No         |
| 13 | <a href="#">BIRC2</a>    | BIRC2<br><a href="#">Entrez</a> ,<br><a href="#">Source</a>    | baculoviral IAP repeat-containing 2                                                                                                     | 3159         | 0.002        | -0.0952 | No         |
| 14 | <a href="#">HSP90AA1</a> | HSP90AA1<br><a href="#">Entrez</a> ,<br><a href="#">Source</a> | heat shock protein 90kDa alpha (cytosolic), class A member 1                                                                            | 3719         | -0.047       | -0.1556 | No         |
| 15 | <a href="#">HSP90AB1</a> | HSP90AB1<br><a href="#">Entrez</a> ,<br><a href="#">Source</a> | heat shock protein 90kDa alpha (cytosolic), class B member 1                                                                            | 4282         | -0.094       | -0.2119 | No         |



|    |                         |                                                               |                                                                                    |      |        |         |     |
|----|-------------------------|---------------------------------------------------------------|------------------------------------------------------------------------------------|------|--------|---------|-----|
| 16 | <a href="#">MAPK3</a>   | MAPK3<br><a href="#">Entrez</a> ,<br><a href="#">Source</a>   | mitogen-activated protein kinase 3                                                 | 4509 | -0.114 | -0.2273 | No  |
| 17 | <a href="#">MAPK13</a>  | MAPK13<br><a href="#">Entrez</a> ,<br><a href="#">Source</a>  | mitogen-activated protein kinase 13                                                | 4691 | -0.129 | -0.2361 | No  |
| 18 | <a href="#">NFKB1</a>   | NFKB1<br><a href="#">Entrez</a> ,<br><a href="#">Source</a>   | nuclear factor of kappa light polypeptide gene enhancer in B-cells 1 (p105)        | 5476 | -0.203 | -0.3078 | No  |
| 19 | <a href="#">CASP1</a>   | CASP1<br><a href="#">Entrez</a> ,<br><a href="#">Source</a>   | caspase 1, apoptosis-related cysteine peptidase (interleukin 1, beta, convertase)  | 5928 | -0.250 | -0.3364 | No  |
| 20 | <a href="#">MAPK10</a>  | MAPK10<br><a href="#">Entrez</a> ,<br><a href="#">Source</a>  | mitogen-activated protein kinase 10                                                | 6420 | -0.307 | -0.3641 | No  |
| 21 | <a href="#">TNFAIP3</a> | TNFAIP3<br><a href="#">Entrez</a> ,<br><a href="#">Source</a> | tumor necrosis factor, alpha-induced protein 3                                     | 6731 | -0.358 | -0.3659 | No  |
| 22 | <a href="#">IKBKG</a>   | IKBKG<br><a href="#">Entrez</a> ,<br><a href="#">Source</a>   | inhibitor of kappa light polypeptide gene enhancer in B-cells, kinase gamma        | 7299 | -0.479 | -0.3861 | Yes |
| 23 | <a href="#">SUGT1</a>   | SUGT1<br><a href="#">Entrez</a> ,<br><a href="#">Source</a>   | SGT1, suppressor of G2 allele of SKP1 ( <i>S. cerevisiae</i> )                     | 7362 | -0.498 | -0.3458 | Yes |
| 24 | <a href="#">MAPK1</a>   | MAPK1<br><a href="#">Entrez</a> ,<br><a href="#">Source</a>   | mitogen-activated protein kinase 1                                                 | 7446 | -0.522 | -0.3057 | Yes |
| 25 | <a href="#">NFKBIB</a>  | NFKBIB<br><a href="#">Entrez</a> ,<br><a href="#">Source</a>  | nuclear factor of kappa light polypeptide gene enhancer in B-cells inhibitor, beta | 7465 | -0.529 | -0.2573 | Yes |
| 26 | <a href="#">TRAF6</a>   | TRAF6<br><a href="#">Entrez</a> ,<br><a href="#">Source</a>   | TNF receptor-associated factor 6                                                   | 7512 | -0.544 | -0.2108 | Yes |
| 27 | <a href="#">HSP90B1</a> | HSP90B1<br><a href="#">Entrez</a> ,<br><a href="#">Source</a> | heat shock protein 90kDa beta (Grp94), member 1                                    | 7620 | -0.578 | -0.1680 | Yes |
| 28 | <a href="#">MAP3K7</a>  | MAP3K7<br><a href="#">Entrez</a> ,<br><a href="#">Source</a>  | mitogen-activated protein kinase kinase kinase 7                                   | 8090 | -0.803 | -0.1460 | Yes |
| 29 | <a href="#">MAPK14</a>  | MAPK14<br><a href="#">Entrez</a> ,<br><a href="#">Source</a>  | mitogen-activated protein kinase 14                                                | 8194 | -0.875 | -0.0745 | Yes |
| 30 | <a href="#">MAPK9</a>   | MAPK9<br><a href="#">Entrez</a> ,<br><a href="#">Source</a>   | mitogen-activated protein kinase 9                                                 | 8528 | -1.320 | 0.0127  | Yes |

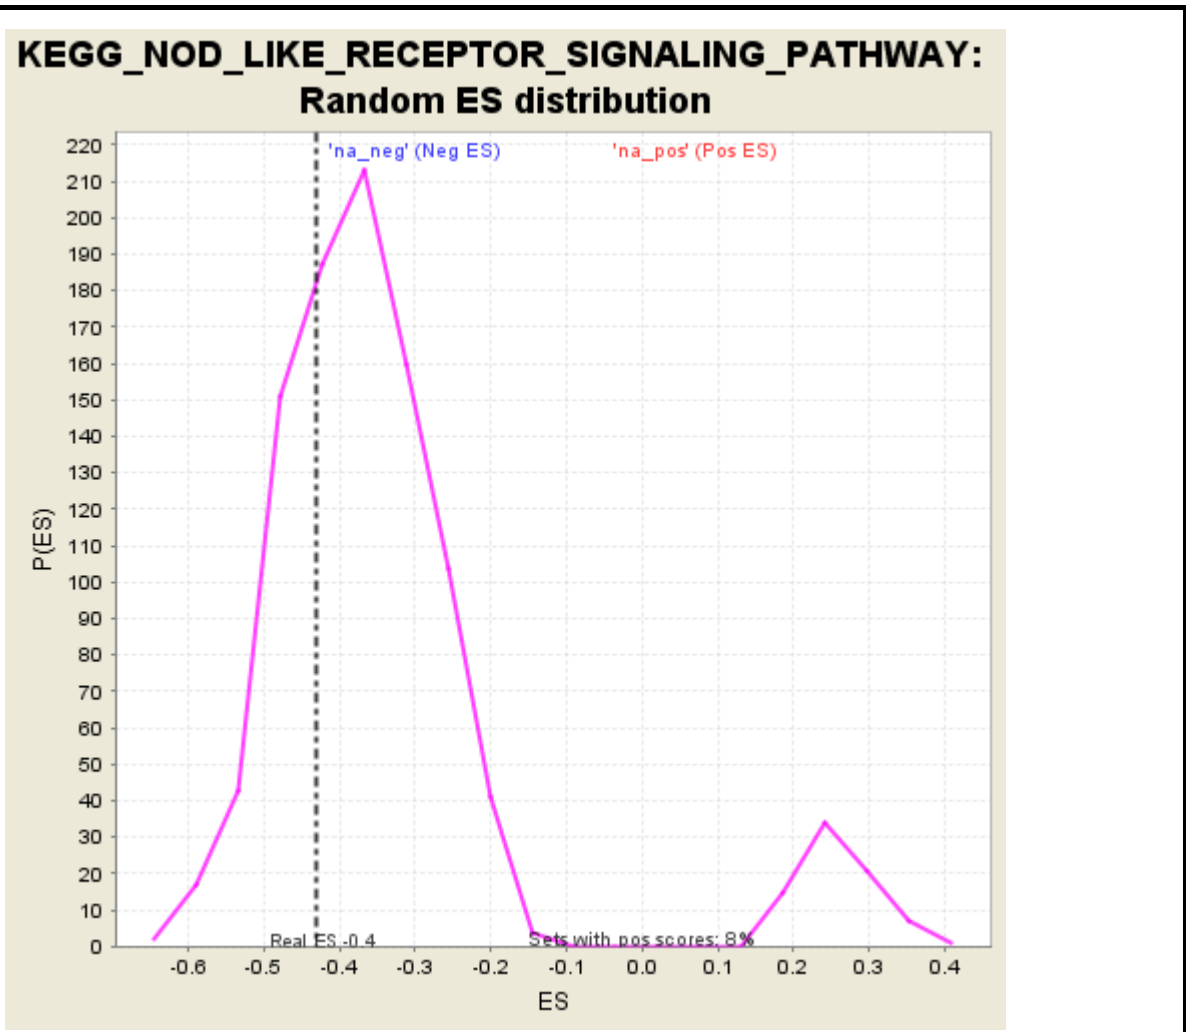

**Fig 2: KEGG\_NOD\_LIKE\_RECEPTOR\_SIGNALING\_PATHWAY: Random ES distribution**

**Gene set null distribution of ES for KEGG\_NOD\_LIKE\_RECEPTOR\_SIGNALING\_PATHWAY**

**Table: GSEA Results Summary**

|                                   |                      |
|-----------------------------------|----------------------|
| Dataset                           | GSEA_18M_collapsed   |
| Phenotype                         | NoPhenotypeAvailable |
| Upregulated in class              | na_neg               |
| GeneSet                           | KEGG_ENDOCYTOSIS     |
| Enrichment Score (ES)             | -0.54580843          |
| Normalized Enrichment Score (NES) | -1.6477028           |
| Nominal p-value                   | 0.0                  |
| FDR q-value                       | 0.056569893          |
| FWER p-Value                      | 0.256                |

**Fig 1: Enrichment plot: KEGG\_ENDOCYTOSIS**  
**Profile of the Running ES Score & Positions of GeneSet Members on the Rank Ordered List**

**Table: GSEA details [\[plain text format\]](#)**

|   | PROBE                 | GENE SYMBOL                             | GENE_TITLE                                                                                               | RANK IN GENE LIST | RANK METRIC SCORE | RUNNING ES | CORE ENRICHMENT |
|---|-----------------------|-----------------------------------------|----------------------------------------------------------------------------------------------------------|-------------------|-------------------|------------|-----------------|
| 1 | <a href="#">PLD2</a>  | PLD2<br><a href="#">Entrez, Source</a>  | phospholipase D2                                                                                         | 408               | 0.383             | -0.0394    | No              |
| 2 | <a href="#">DAB2</a>  | DAB2<br><a href="#">Entrez, Source</a>  | disabled homolog 2, mitogen-responsive phosphoprotein (Drosophila)                                       | 505               | 0.347             | -0.0429    | No              |
| 3 | <a href="#">ADRB1</a> | ADRB1<br><a href="#">Entrez, Source</a> | adrenergic, beta-1-, receptor                                                                            | 604               | 0.320             | -0.0474    | No              |
| 4 | <a href="#">FLT1</a>  | FLT1<br><a href="#">Entrez, Source</a>  | fms-related tyrosine kinase 1 (vascular endothelial growth factor/vascular permeability factor receptor) | 800               | 0.281             | -0.0640    | No              |
| 5 | <a href="#">IGF1R</a> | IGF1R<br><a href="#">Entrez, Source</a> | insulin-like growth factor 1 receptor                                                                    | 1122              | 0.222             | -0.0967    | No              |
| 6 | <a href="#">CBLB</a>  | CBLB<br><a href="#">Entrez, Source</a>  | Cas-Br-M (murine) ecotropic retroviral transforming sequence b                                           | 1168              | 0.215             | -0.0973    | No              |
| 7 | <a href="#">CLTC</a>  | CLTC<br><a href="#">Entrez,</a>         | clathrin, heavy chain (Hc)                                                                               | 1194              | 0.211             | -0.0955    | No              |

|    |                         | Source                                                        |                                                         |      |       |         |    |
|----|-------------------------|---------------------------------------------------------------|---------------------------------------------------------|------|-------|---------|----|
| 8  | <a href="#">PIP5K1B</a> | PIP5K1B<br><a href="#">Entrez</a> ,<br><a href="#">Source</a> | phosphatidylinositol-4-phosphate 5-kinase, type I, beta | 1254 | 0.202 | -0.0980 | No |
| 9  | <a href="#">F2R</a>     | F2R<br><a href="#">Entrez</a> ,<br><a href="#">Source</a>     | coagulation factor II (thrombin) receptor               | 1279 | 0.197 | -0.0964 | No |
| 10 | <a href="#">PLD1</a>    | PLD1<br><a href="#">Entrez</a> ,<br><a href="#">Source</a>    | phospholipase D1, phosphatidylcholine-specific          | 1289 | 0.196 | -0.0931 | No |
| 11 | <a href="#">IL2RB</a>   | IL2RB<br><a href="#">Entrez</a> ,<br><a href="#">Source</a>   | interleukin 2 receptor, beta                            | 1344 | 0.188 | -0.0953 | No |
| 12 | <a href="#">ADRB3</a>   | ADRB3<br><a href="#">Entrez</a> ,<br><a href="#">Source</a>   | adrenergic, beta-3-, receptor                           | 1367 | 0.185 | -0.0938 | No |
| 13 | <a href="#">USP8</a>    | USP8<br><a href="#">Entrez</a> ,<br><a href="#">Source</a>    | ubiquitin specific peptidase 8                          | 1507 | 0.170 | -0.1063 | No |
| 14 | <a href="#">ADRBK2</a>  | ADRBK2<br><a href="#">Entrez</a> ,<br><a href="#">Source</a>  | adrenergic, beta, receptor kinase 2                     | 1691 | 0.148 | -0.1245 | No |
| 15 | <a href="#">NTRK1</a>   | NTRK1<br><a href="#">Entrez</a> ,<br><a href="#">Source</a>   | neurotrophic tyrosine kinase, receptor, type 1          | 1695 | 0.147 | -0.1216 | No |
| 16 | <a href="#">RAB11B</a>  | RAB11B<br><a href="#">Entrez</a> ,<br><a href="#">Source</a>  | RAB11B, member RAS oncogene family                      | 1726 | 0.144 | -0.1219 | No |
| 17 | <a href="#">PSD</a>     | PSD<br><a href="#">Entrez</a> ,<br><a href="#">Source</a>     | pleckstrin and Sec7 domain containing                   | 1759 | 0.139 | -0.1226 | No |
| 18 | <a href="#">HSPA8</a>   | HSPA8<br><a href="#">Entrez</a> ,<br><a href="#">Source</a>   | heat shock 70kDa protein 8                              | 1905 | 0.122 | -0.1369 | No |
| 19 | <a href="#">AP2A1</a>   | AP2A1<br><a href="#">Entrez</a> ,<br><a href="#">Source</a>   | adaptor-related protein complex 2, alpha 1 subunit      | 1919 | 0.121 | -0.1357 | No |
| 20 | <a href="#">SMURF1</a>  | SMURF1<br><a href="#">Entrez</a> ,<br><a href="#">Source</a>  | SMAD specific E3 ubiquitin protein ligase 1             | 1954 | 0.117 | -0.1371 | No |
| 21 | <a href="#">CCR5</a>    | CCR5<br><a href="#">Entrez</a> ,<br><a href="#">Source</a>    | chemokine (C-C motif) receptor 5                        | 1973 | 0.115 | -0.1367 | No |
| 22 | <a href="#">CLTA</a>    | CLTA<br><a href="#">Entrez</a> ,<br><a href="#">Source</a>    | clathrin, light chain (Lca)                             | 2024 | 0.110 | -0.1401 | No |
| 23 | <a href="#">VPS37C</a>  | VPS37C<br><a href="#">Entrez</a> ,<br><a href="#">Source</a>  | vacuolar protein sorting 37 homolog C (S. cerevisiae)   | 2264 | 0.086 | -0.1662 | No |

|    |                        |                                                             |                                                                                                             |      |        |         |    |
|----|------------------------|-------------------------------------------------------------|-------------------------------------------------------------------------------------------------------------|------|--------|---------|----|
| 24 | <a href="#">CXCR4</a>  | CXCR4<br><a href="#">Entrez,</a><br><a href="#">Source</a>  | chemokine (C-X-C motif)<br>receptor 4                                                                       | 2355 | 0.078  | -0.1751 | No |
| 25 | <a href="#">IQSEC2</a> | IQSEC2<br><a href="#">Entrez,</a><br><a href="#">Source</a> | IQ motif and Sec7 domain 2                                                                                  | 2690 | 0.044  | -0.2133 | No |
| 26 | <a href="#">IQSEC1</a> | IQSEC1<br><a href="#">Entrez,</a><br><a href="#">Source</a> | IQ motif and Sec7 domain 1                                                                                  | 2777 | 0.035  | -0.2226 | No |
| 27 | <a href="#">VPS4B</a>  | VPS4B<br><a href="#">Entrez,</a><br><a href="#">Source</a>  | vacuolar protein sorting 4<br>homolog B ( <i>S. cerevisiae</i> )                                            | 2781 | 0.035  | -0.2222 | No |
| 28 | <a href="#">TFRC</a>   | TFRC<br><a href="#">Entrez,</a><br><a href="#">Source</a>   | transferrin receptor (p90,<br>CD71)                                                                         | 2950 | 0.020  | -0.2414 | No |
| 29 | <a href="#">SH3GL3</a> | SH3GL3<br><a href="#">Entrez,</a><br><a href="#">Source</a> | SH3-domain GRB2-like 3                                                                                      | 2987 | 0.016  | -0.2453 | No |
| 30 | <a href="#">ADRB2</a>  | ADRB2<br><a href="#">Entrez,</a><br><a href="#">Source</a>  | adrenergic, beta-2-, receptor,<br>surface                                                                   | 3187 | -0.000 | -0.2686 | No |
| 31 | <a href="#">ITCH</a>   | ITCH<br><a href="#">Entrez,</a><br><a href="#">Source</a>   | itchy homolog E3 ubiquitin<br>protein ligase (mouse)                                                        | 3262 | -0.007 | -0.2772 | No |
| 32 | <a href="#">EGFR</a>   | EGFR<br><a href="#">Entrez,</a><br><a href="#">Source</a>   | epidermal growth factor<br>receptor (erythroblastic<br>leukemia viral (v-erb-b)<br>oncogene homolog, avian) | 3352 | -0.015 | -0.2873 | No |
| 33 | <a href="#">EPN1</a>   | EPN1<br><a href="#">Entrez,</a><br><a href="#">Source</a>   | epsin 1                                                                                                     | 3398 | -0.019 | -0.2921 | No |
| 34 | <a href="#">PRKCI</a>  | PRKCI<br><a href="#">Entrez,</a><br><a href="#">Source</a>  | protein kinase C, iota                                                                                      | 3461 | -0.023 | -0.2989 | No |
| 35 | <a href="#">LDLR</a>   | LDLR<br><a href="#">Entrez,</a><br><a href="#">Source</a>   | low density lipoprotein<br>receptor (familial<br>hypercholesterolemia)                                      | 3513 | -0.027 | -0.3043 | No |
| 36 | <a href="#">PSD2</a>   | PSD2<br><a href="#">Entrez,</a><br><a href="#">Source</a>   | pleckstrin and Sec7 domain<br>containing 2                                                                  | 3626 | -0.039 | -0.3165 | No |
| 37 | <a href="#">VPS37D</a> | VPS37D<br><a href="#">Entrez,</a><br><a href="#">Source</a> | vacuolar protein sorting 37<br>homolog D ( <i>S. cerevisiae</i> )                                           | 3655 | -0.042 | -0.3189 | No |
| 38 | <a href="#">GIT2</a>   | GIT2<br><a href="#">Entrez,</a><br><a href="#">Source</a>   | G protein-coupled receptor<br>kinase interactor 2                                                           | 3866 | -0.058 | -0.3422 | No |
| 39 | <a href="#">PARD6B</a> | PARD6B<br><a href="#">Entrez,</a><br><a href="#">Source</a> | par-6 partitioning defective 6<br>homolog beta ( <i>C. elegans</i> )                                        | 4010 | -0.072 | -0.3574 | No |

|    |                         |                                                               |                                                                                                        |      |        |         |    |
|----|-------------------------|---------------------------------------------------------------|--------------------------------------------------------------------------------------------------------|------|--------|---------|----|
| 40 | <a href="#">EPN2</a>    | EPN2<br><a href="#">Entrez</a> ,<br><a href="#">Source</a>    | epsin 2                                                                                                | 4042 | -0.074 | -0.3594 | No |
| 41 | <a href="#">AP2M1</a>   | AP2M1<br><a href="#">Entrez</a> ,<br><a href="#">Source</a>   | adaptor-related protein complex 2, mu 1 subunit                                                        | 4116 | -0.081 | -0.3662 | No |
| 42 | <a href="#">HSPA1B</a>  | HSPA1B<br><a href="#">Entrez</a> ,<br><a href="#">Source</a>  | heat shock 70kDa protein 1B                                                                            | 4249 | -0.092 | -0.3796 | No |
| 43 | <a href="#">ARRB2</a>   | ARRB2<br><a href="#">Entrez</a> ,<br><a href="#">Source</a>   | arrestin, beta 2                                                                                       | 4303 | -0.096 | -0.3837 | No |
| 44 | <a href="#">SH3GL1</a>  | SH3GL1<br><a href="#">Entrez</a> ,<br><a href="#">Source</a>  | SH3-domain GRB2-like 1                                                                                 | 4373 | -0.102 | -0.3896 | No |
| 45 | <a href="#">SNF8</a>    | SNF8<br><a href="#">Entrez</a> ,<br><a href="#">Source</a>    | SNF8, ESCRT-II complex subunit, homolog (S. cerevisiae)                                                | 4395 | -0.103 | -0.3897 | No |
| 46 | <a href="#">ERBB3</a>   | ERBB3<br><a href="#">Entrez</a> ,<br><a href="#">Source</a>   | v-erb-b2 erythroblastic leukemia viral oncogene homolog 3 (avian)                                      | 4711 | -0.131 | -0.4238 | No |
| 47 | <a href="#">GIT1</a>    | GIT1<br><a href="#">Entrez</a> ,<br><a href="#">Source</a>    | G protein-coupled receptor kinase interactor 1                                                         | 4714 | -0.131 | -0.4211 | No |
| 48 | <a href="#">ARFGAP1</a> | ARFGAP1<br><a href="#">Entrez</a> ,<br><a href="#">Source</a> | ADP-ribosylation factor GTPase activating protein 1                                                    | 4800 | -0.139 | -0.4280 | No |
| 49 | <a href="#">CSF1R</a>   | CSF1R<br><a href="#">Entrez</a> ,<br><a href="#">Source</a>   | colony stimulating factor 1 receptor, formerly McDonough feline sarcoma viral (v-fms) oncogene homolog | 4946 | -0.153 | -0.4416 | No |
| 50 | <a href="#">RAB5C</a>   | RAB5C<br><a href="#">Entrez</a> ,<br><a href="#">Source</a>   | RAB5C, member RAS oncogene family                                                                      | 5085 | -0.165 | -0.4542 | No |
| 51 | <a href="#">EPN3</a>    | EPN3<br><a href="#">Entrez</a> ,<br><a href="#">Source</a>    | epsin 3                                                                                                | 5124 | -0.169 | -0.4549 | No |
| 52 | <a href="#">IQSEC3</a>  | IQSEC3<br><a href="#">Entrez</a> ,<br><a href="#">Source</a>  | IQ motif and Sec7 domain 3                                                                             | 5154 | -0.171 | -0.4545 | No |
| 53 | <a href="#">ARFGAP3</a> | ARFGAP3<br><a href="#">Entrez</a> ,<br><a href="#">Source</a> | ADP-ribosylation factor GTPase activating protein 3                                                    | 5251 | -0.180 | -0.4618 | No |
| 54 | <a href="#">HSPA2</a>   | HSPA2<br><a href="#">Entrez</a> ,<br><a href="#">Source</a>   | heat shock 70kDa protein 2                                                                             | 5320 | -0.186 | -0.4656 | No |
| 55 | <a href="#">EHD2</a>    | EHD2<br><a href="#">Entrez</a> ,<br><a href="#">Source</a>    | EH-domain containing 2                                                                                 | 5323 | -0.186 | -0.4617 | No |

|    |                           |                                                                 |                                                                         |      |        |         |    |
|----|---------------------------|-----------------------------------------------------------------|-------------------------------------------------------------------------|------|--------|---------|----|
| 56 | <a href="#">SH3GLB1</a>   | SH3GLB1<br><a href="#">Entrez</a> ,<br><a href="#">Source</a>   | SH3-domain GRB2-like endophilin B1                                      | 5409 | -0.196 | -0.4674 | No |
| 57 | <a href="#">RAB11FIP5</a> | RAB11FIP5<br><a href="#">Entrez</a> ,<br><a href="#">Source</a> | RAB11 family interacting protein 5 (class I)                            | 5518 | -0.207 | -0.4754 | No |
| 58 | <a href="#">STAM</a>      | STAM<br><a href="#">Entrez</a> ,<br><a href="#">Source</a>      | signal transducing adaptor molecule (SH3 domain and ITAM motif) 1       | 5624 | -0.217 | -0.4829 | No |
| 59 | <a href="#">VPS28</a>     | VPS28<br><a href="#">Entrez</a> ,<br><a href="#">Source</a>     | vacuolar protein sorting 28 homolog (S. cerevisiae)                     | 5632 | -0.217 | -0.4789 | No |
| 60 | <a href="#">HSPA1A</a>    | HSPA1A<br><a href="#">Entrez</a> ,<br><a href="#">Source</a>    | heat shock 70kDa protein 1A                                             | 5635 | -0.218 | -0.4744 | No |
| 61 | <a href="#">EHD3</a>      | EHD3<br><a href="#">Entrez</a> ,<br><a href="#">Source</a>      | EH-domain containing 3                                                  | 5780 | -0.233 | -0.4861 | No |
| 62 | <a href="#">PSD3</a>      | PSD3<br><a href="#">Entrez</a> ,<br><a href="#">Source</a>      | pleckstrin and Sec7 domain containing 3                                 | 5918 | -0.249 | -0.4966 | No |
| 63 | <a href="#">VPS37A</a>    | VPS37A<br><a href="#">Entrez</a> ,<br><a href="#">Source</a>    | vacuolar protein sorting 37 homolog A (S. cerevisiae)                   | 5952 | -0.252 | -0.4949 | No |
| 64 | <a href="#">VPS37B</a>    | VPS37B<br><a href="#">Entrez</a> ,<br><a href="#">Source</a>    | vacuolar protein sorting 37 homolog B (S. cerevisiae)                   | 6101 | -0.269 | -0.5063 | No |
| 65 | <a href="#">MDM2</a>      | MDM2<br><a href="#">Entrez</a> ,<br><a href="#">Source</a>      | Mdm2, transformed 3T3 cell double minute 2, p53 binding protein (mouse) | 6102 | -0.269 | -0.5003 | No |
| 66 | <a href="#">EHD4</a>      | EHD4<br><a href="#">Entrez</a> ,<br><a href="#">Source</a>      | EH-domain containing 4                                                  | 6136 | -0.272 | -0.4982 | No |
| 67 | <a href="#">CLTB</a>      | CLTB<br><a href="#">Entrez</a> ,<br><a href="#">Source</a>      | clathrin, light chain (Lcb)                                             | 6176 | -0.276 | -0.4966 | No |
| 68 | <a href="#">RAB4A</a>     | RAB4A<br><a href="#">Entrez</a> ,<br><a href="#">Source</a>     | RAB4A, member RAS oncogene family                                       | 6227 | -0.283 | -0.4962 | No |
| 69 | <a href="#">DNM2</a>      | DNM2<br><a href="#">Entrez</a> ,<br><a href="#">Source</a>      | dynamain 2                                                              | 6331 | -0.296 | -0.5017 | No |
| 70 | <a href="#">PRKCZ</a>     | PRKCZ<br><a href="#">Entrez</a> ,<br><a href="#">Source</a>     | protein kinase C, zeta                                                  | 6381 | -0.303 | -0.5008 | No |
| 71 | <a href="#">STAM2</a>     | STAM2<br><a href="#">Entrez</a> ,<br><a href="#">Source</a>     | signal transducing adaptor molecule (SH3 domain and ITAM motif) 2       | 6394 | -0.305 | -0.4954 | No |
| 72 | <a href="#">EHD1</a>      | EHD1<br><a href="#">Entrez</a> ,<br><a href="#">Source</a>      | EH-domain containing 1                                                  | 6800 | -0.370 | -0.5347 | No |

|    |                           |                                                                                 |                                                                  |      |        |         |     |
|----|---------------------------|---------------------------------------------------------------------------------|------------------------------------------------------------------|------|--------|---------|-----|
| 73 | <a href="#">ERBB4</a>     | <a href="#">ERBB4</a><br><a href="#">Entrez</a> ,<br><a href="#">Source</a>     | v-erb-a erythroblastic leukemia viral oncogene homolog 4 (avian) | 6803 | -0.370 | -0.5268 | No  |
| 74 | <a href="#">DNM3</a>      | <a href="#">DNM3</a><br><a href="#">Entrez</a> ,<br><a href="#">Source</a>      | dynamain 3                                                       | 6887 | -0.386 | -0.5279 | No  |
| 75 | <a href="#">LDLRAP1</a>   | <a href="#">LDLRAP1</a><br><a href="#">Entrez</a> ,<br><a href="#">Source</a>   | low density lipoprotein receptor adaptor protein 1               | 7004 | -0.407 | -0.5325 | No  |
| 76 | <a href="#">PARD6A</a>    | <a href="#">PARD6A</a><br><a href="#">Entrez</a> ,<br><a href="#">Source</a>    | par-6 partitioning defective 6 homolog alpha (C.elegans)         | 7071 | -0.422 | -0.5309 | No  |
| 77 | <a href="#">ADRBK1</a>    | <a href="#">ADRBK1</a><br><a href="#">Entrez</a> ,<br><a href="#">Source</a>    | adrenergic, beta, receptor kinase 1                              | 7199 | -0.452 | -0.5358 | Yes |
| 78 | <a href="#">PARD3</a>     | <a href="#">PARD3</a><br><a href="#">Entrez</a> ,<br><a href="#">Source</a>     | par-3 partitioning defective 3 homolog (C. elegans)              | 7203 | -0.453 | -0.5261 | Yes |
| 79 | <a href="#">RAB22A</a>    | <a href="#">RAB22A</a><br><a href="#">Entrez</a> ,<br><a href="#">Source</a>    | RAB22A, member RAS oncogene family                               | 7244 | -0.463 | -0.5205 | Yes |
| 80 | <a href="#">RABEP1</a>    | <a href="#">RABEP1</a><br><a href="#">Entrez</a> ,<br><a href="#">Source</a>    | rabaptin, RAB GTPase binding effector protein 1                  | 7253 | -0.466 | -0.5111 | Yes |
| 81 | <a href="#">RAB11FIP2</a> | <a href="#">RAB11FIP2</a><br><a href="#">Entrez</a> ,<br><a href="#">Source</a> | RAB11 family interacting protein 2 (class I)                     | 7260 | -0.468 | -0.5015 | Yes |
| 82 | <a href="#">VPS25</a>     | <a href="#">VPS25</a><br><a href="#">Entrez</a> ,<br><a href="#">Source</a>     | vacuolar protein sorting 25 homolog (S. cerevisiae)              | 7287 | -0.477 | -0.4939 | Yes |
| 83 | <a href="#">RAB11A</a>    | <a href="#">RAB11A</a><br><a href="#">Entrez</a> ,<br><a href="#">Source</a>    | RAB11A, member RAS oncogene family                               | 7318 | -0.484 | -0.4867 | Yes |
| 84 | <a href="#">SMURF2</a>    | <a href="#">SMURF2</a><br><a href="#">Entrez</a> ,<br><a href="#">Source</a>    | SMAD specific E3 ubiquitin protein ligase 2                      | 7359 | -0.496 | -0.4804 | Yes |
| 85 | <a href="#">KIT</a>       | <a href="#">KIT</a><br><a href="#">Entrez</a> ,<br><a href="#">Source</a>       | v-kit Hardy-Zuckerman 4 feline sarcoma viral oncogene homolog    | 7372 | -0.500 | -0.4707 | Yes |
| 86 | <a href="#">ARF6</a>      | <a href="#">ARF6</a><br><a href="#">Entrez</a> ,<br><a href="#">Source</a>      | ADP-ribosylation factor 6                                        | 7420 | -0.513 | -0.4649 | Yes |
| 87 | <a href="#">PDGFRA</a>    | <a href="#">PDGFRA</a><br><a href="#">Entrez</a> ,<br><a href="#">Source</a>    | platelet-derived growth factor receptor, alpha polypeptide       | 7458 | -0.526 | -0.4575 | Yes |
| 88 | <a href="#">RAB11FIP4</a> | <a href="#">RAB11FIP4</a><br><a href="#">Entrez</a> ,<br><a href="#">Source</a> | RAB11 family interacting protein 4 (class II)                    | 7497 | -0.540 | -0.4500 | Yes |
| 89 | <a href="#">TRAF6</a>     | <a href="#">TRAF6</a><br><a href="#">Entrez</a> ,<br><a href="#">Source</a>     | TNF receptor-associated factor 6                                 | 7512 | -0.544 | -0.4396 | Yes |



|     |                         |                                                               |                                                                                                           |      |        |         |     |
|-----|-------------------------|---------------------------------------------------------------|-----------------------------------------------------------------------------------------------------------|------|--------|---------|-----|
| 90  | <a href="#">NEDD4L</a>  | NEDD4L<br><a href="#">Entrez</a> ,<br><a href="#">Source</a>  | neural precursor cell expressed, developmentally down-regulated 4-like                                    | 7522 | -0.548 | -0.4285 | Yes |
| 91  | <a href="#">RAB5B</a>   | RAB5B<br><a href="#">Entrez</a> ,<br><a href="#">Source</a>   | RAB5B, member RAS oncogene family                                                                         | 7631 | -0.580 | -0.4283 | Yes |
| 92  | <a href="#">WWP1</a>    | WWP1<br><a href="#">Entrez</a> ,<br><a href="#">Source</a>    | WW domain containing E3 ubiquitin protein ligase 1                                                        | 7679 | -0.601 | -0.4205 | Yes |
| 93  | <a href="#">SH3KBP1</a> | SH3KBP1<br><a href="#">Entrez</a> ,<br><a href="#">Source</a> | SH3-domain kinase binding protein 1                                                                       | 7855 | -0.678 | -0.4260 | Yes |
| 94  | <a href="#">RET</a>     | RET<br><a href="#">Entrez</a> ,<br><a href="#">Source</a>     | ret proto-oncogene (multiple endocrine neoplasia and medullary thyroid carcinoma 1, Hirschsprung disease) | 7882 | -0.688 | -0.4138 | Yes |
| 95  | <a href="#">PIP5K1A</a> | PIP5K1A<br><a href="#">Entrez</a> ,<br><a href="#">Source</a> | phosphatidylinositol-4-phosphate 5-kinase, type I, alpha                                                  | 7914 | -0.701 | -0.4019 | Yes |
| 96  | <a href="#">FGFR3</a>   | FGFR3<br><a href="#">Entrez</a> ,<br><a href="#">Source</a>   | fibroblast growth factor receptor 3 (achondroplasia, thanatophoric dwarfism)                              | 7961 | -0.722 | -0.3913 | Yes |
| 97  | <a href="#">DNM1</a>    | DNM1<br><a href="#">Entrez</a> ,<br><a href="#">Source</a>    | dynamain 1                                                                                                | 7993 | -0.744 | -0.3784 | Yes |
| 98  | <a href="#">PIP5K1C</a> | PIP5K1C<br><a href="#">Entrez</a> ,<br><a href="#">Source</a> | phosphatidylinositol-4-phosphate 5-kinase, type I, gamma                                                  | 8086 | -0.800 | -0.3715 | Yes |
| 99  | <a href="#">RNF41</a>   | RNF41<br><a href="#">Entrez</a> ,<br><a href="#">Source</a>   | ring finger protein 41                                                                                    | 8088 | -0.801 | -0.3538 | Yes |
| 100 | <a href="#">PARD6G</a>  | PARD6G<br><a href="#">Entrez</a> ,<br><a href="#">Source</a>  | par-6 partitioning defective 6 homolog gamma (C. elegans)                                                 | 8116 | -0.817 | -0.3389 | Yes |
| 101 | <a href="#">AP2A2</a>   | AP2A2<br><a href="#">Entrez</a> ,<br><a href="#">Source</a>   | adaptor-related protein complex 2, alpha 2 subunit                                                        | 8259 | -0.929 | -0.3349 | Yes |
| 102 | <a href="#">NEDD4</a>   | NEDD4<br><a href="#">Entrez</a> ,<br><a href="#">Source</a>   | neural precursor cell expressed, developmentally down-regulated 4                                         | 8350 | -1.020 | -0.3229 | Yes |
| 103 | <a href="#">SMAP1</a>   | SMAP1<br><a href="#">Entrez</a> ,<br><a href="#">Source</a>   | stromal membrane-associated protein 1                                                                     | 8356 | -1.023 | -0.3008 | Yes |
| 104 | <a href="#">CBL</a>     | CBL<br><a href="#">Entrez</a> ,<br><a href="#">Source</a>     | Cas-Br-M (murine) ecotropic retroviral transforming sequence                                              | 8393 | -1.070 | -0.2813 | Yes |
| 105 | <a href="#">FGFR2</a>   | FGFR2<br><a href="#">Entrez</a> ,<br><a href="#">Source</a>   | ffer syndrome, Jackson-Weiss syndrome)                                                                    | 8439 | -1.146 | -0.2611 | Yes |

|     |                         |                                                               |                                                             |      |        |         |     |
|-----|-------------------------|---------------------------------------------------------------|-------------------------------------------------------------|------|--------|---------|-----|
| 106 | <a href="#">STAMBP</a>  | STAMBP<br><a href="#">Entrez</a> ,<br><a href="#">Source</a>  | STAM binding protein                                        | 8452 | -1.159 | -0.2368 | Yes |
| 107 | <a href="#">EPS15</a>   | EPS15<br><a href="#">Entrez</a> ,<br><a href="#">Source</a>   | epidermal growth factor<br>receptor pathway substrate<br>15 | 8469 | -1.184 | -0.2125 | Yes |
| 108 | <a href="#">ZFYVE20</a> | ZFYVE20<br><a href="#">Entrez</a> ,<br><a href="#">Source</a> | zinc finger, FYVE domain<br>containing 20                   | 8492 | -1.223 | -0.1879 | Yes |
| 109 | <a href="#">PDCD6IP</a> | PDCD6IP<br><a href="#">Entrez</a> ,<br><a href="#">Source</a> | programmed cell death 6<br>interacting protein              | 8493 | -1.224 | -0.1608 | Yes |
| 110 | <a href="#">SH3GL2</a>  | SH3GL2<br><a href="#">Entrez</a> ,<br><a href="#">Source</a>  | SH3-domain GRB2-like 2                                      | 8533 | -1.335 | -0.1357 | Yes |
| 111 | <a href="#">DNAJC6</a>  | DNAJC6<br><a href="#">Entrez</a> ,<br><a href="#">Source</a>  | DnaJ (Hsp40) homolog,<br>subfamily C, member 6              | 8536 | -1.342 | -0.1062 | Yes |
| 112 | <a href="#">AP2B1</a>   | AP2B1<br><a href="#">Entrez</a> ,<br><a href="#">Source</a>   | adaptor-related protein<br>complex 2, beta 1 subunit        | 8540 | -1.348 | -0.0767 | Yes |
| 113 | <a href="#">RAB31</a>   | RAB31<br><a href="#">Entrez</a> ,<br><a href="#">Source</a>   | RAB31, member RAS<br>oncogene family                        | 8565 | -1.397 | -0.0485 | Yes |
| 114 | <a href="#">DNM1L</a>   | DNM1L<br><a href="#">Entrez</a> ,<br><a href="#">Source</a>   | dynamamin 1-like                                            | 8635 | -2.564 | 0.0002  | Yes |

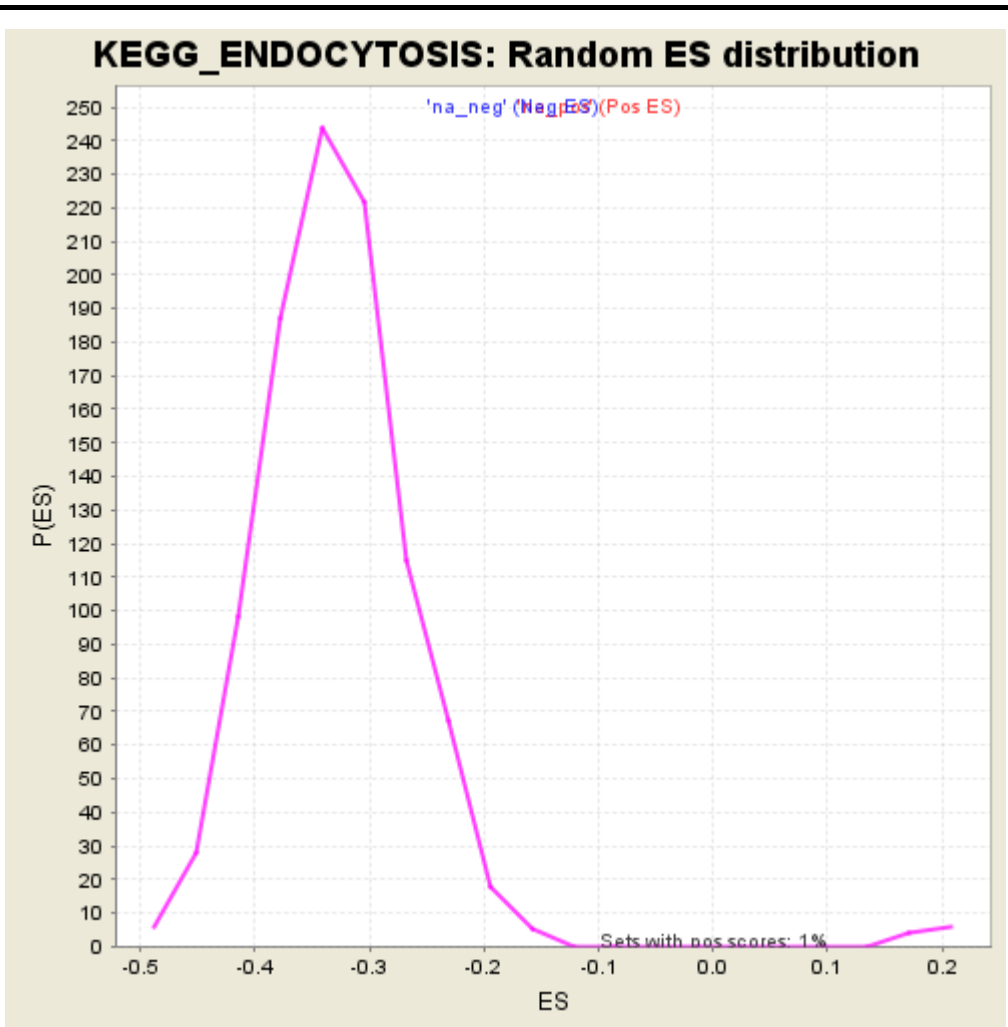

**Fig 2: KEGG\_ENDOCYTOSIS: Random ES distribution**  
**Gene set null distribution of ES for KEGG\_ENDOCYTOSIS**

**Table: GSEA Results Summary**

|                                   |                                               |
|-----------------------------------|-----------------------------------------------|
| Dataset                           | GSEA_18M_collapsed                            |
| Phenotype                         | NoPhenotypeAvailable                          |
| Upregulated in class              | na_neg                                        |
| GeneSet                           | KEGG_ALANINE_ASPARTATE_AND_GLYC... METABOLISM |
| Enrichment Score (ES)             | -0.6235607                                    |
| Normalized Enrichment Score (NES) | -1.5814384                                    |
| Nominal p-value                   | 0.010215664                                   |
| FDR q-value                       | 0.11791854                                    |
| FWER p-Value                      | 0.524                                         |

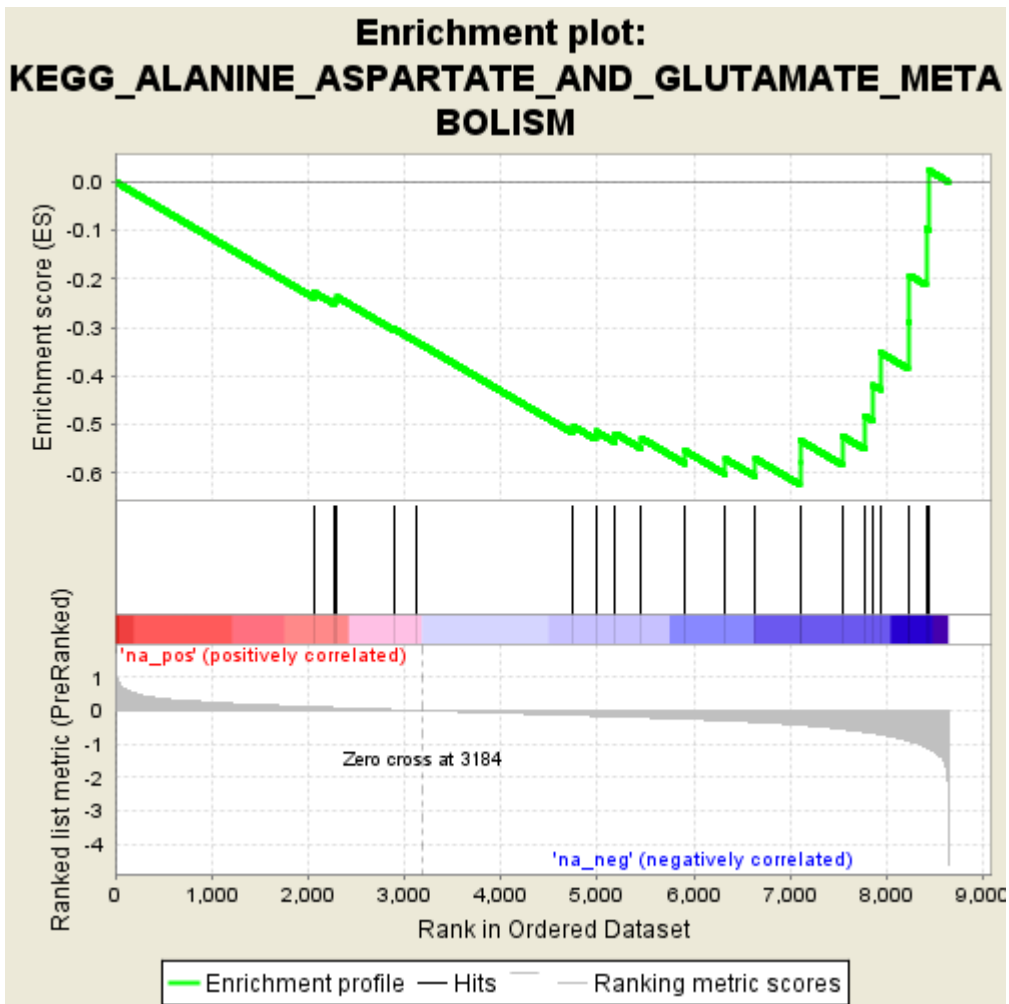

**Fig 1: Enrichment plot:**  
**KEGG\_ALANINE\_ASPARTATE\_AND\_GLYC... METABOLISM**  
**Profile of the Running ES Score & Positions of GeneSet Members on the Rank Ordered List**

**Table: GSEA details [plain text format]**

|    | PROBE                   | GENE SYMBOL                                                   | GENE_TITLE                                                                        | RANK IN GENE LIST | RANK METRIC SCORE | RUNNING ES | CORE ENRICHMENT |
|----|-------------------------|---------------------------------------------------------------|-----------------------------------------------------------------------------------|-------------------|-------------------|------------|-----------------|
| 1  | <a href="#">ASL</a>     | ASL<br><a href="#">Entrez</a> ,<br><a href="#">Source</a>     | argininosuccinate lyase                                                           | 2059              | 0.107             | -0.2275    | No              |
| 2  | <a href="#">GLS</a>     | GLS<br><a href="#">Entrez</a> ,<br><a href="#">Source</a>     | glutaminase                                                                       | 2277              | 0.085             | -0.2436    | No              |
| 3  | <a href="#">GLS2</a>    | GLS2<br><a href="#">Entrez</a> ,<br><a href="#">Source</a>    | glutaminase 2 (liver, mitochondrial)                                              | 2302              | 0.083             | -0.2375    | No              |
| 4  | <a href="#">ACY3</a>    | ACY3<br><a href="#">Entrez</a> ,<br><a href="#">Source</a>    | aspartoacylase (aminocyclase) 3                                                   | 2888              | 0.026             | -0.3027    | No              |
| 5  | <a href="#">CAD</a>     | CAD<br><a href="#">Entrez</a> ,<br><a href="#">Source</a>     | carbamoyl-phosphate synthetase 2, aspartate transcarbamylase, and dihydroorotase  | 3117              | 0.005             | -0.3286    | No              |
| 6  | <a href="#">ALDH5A1</a> | ALDH5A1<br><a href="#">Entrez</a> ,<br><a href="#">Source</a> | aldehyde dehydrogenase 5 family, member A1 (succinate-semialdehyde dehydrogenase) | 4750              | -0.134            | -0.5036    | No              |
| 7  | <a href="#">PPAT</a>    | PPAT<br><a href="#">Entrez</a> ,<br><a href="#">Source</a>    | phosphoribosyl pyrophosphate amidotransferase                                     | 4983              | -0.156            | -0.5138    | No              |
| 8  | <a href="#">ADSS</a>    | ADSS<br><a href="#">Entrez</a> ,<br><a href="#">Source</a>    | adenylosuccinate synthase                                                         | 5183              | -0.174            | -0.5182    | No              |
| 9  | <a href="#">ADSSL1</a>  | ADSSL1<br><a href="#">Entrez</a> ,<br><a href="#">Source</a>  | adenylosuccinate synthase like 1                                                  | 5457              | -0.201            | -0.5284    | No              |
| 10 | <a href="#">ABAT</a>    | ABAT<br><a href="#">Entrez</a> ,<br><a href="#">Source</a>    | 4-aminobutyrate aminotransferase                                                  | 5908              | -0.247            | -0.5541    | No              |
| 11 | <a href="#">GLUL</a>    | GLUL<br><a href="#">Entrez</a> ,<br><a href="#">Source</a>    | glutamate-ammonia ligase (glutamine synthetase)                                   | 6327              | -0.296            | -0.5710    | No              |
| 12 | <a href="#">ASPA</a>    | ASPA<br><a href="#">Entrez</a> ,<br><a href="#">Source</a>    | aspartoacylase (Canavan disease)                                                  | 6638              | -0.342            | -0.5703    | No              |
| 13 | <a href="#">DDO</a>     | DDO<br><a href="#">Entrez</a> ,<br><a href="#">Source</a>     | D-aspartate oxidase                                                               | 7098              | -0.426            | -0.5779    | Yes             |
| 14 | <a href="#">NIT2</a>    | NIT2<br><a href="#">Entrez</a> ,<br><a href="#">Source</a>    | nitrilase family, member 2                                                        | 7100              | -0.426            | -0.5323    | Yes             |

|    |                       |                                                             |                                                                                   |      |        |         |     |
|----|-----------------------|-------------------------------------------------------------|-----------------------------------------------------------------------------------|------|--------|---------|-----|
| 15 | <a href="#">GLUD1</a> | GLUD1<br><a href="#">Entrez</a> ,<br><a href="#">Source</a> | glutamate dehydrogenase 1                                                         | 7538 | -0.554 | -0.5237 | Yes |
| 16 | <a href="#">ASS1</a>  | ASS1<br><a href="#">Entrez</a> ,<br><a href="#">Source</a>  | argininosuccinate synthetase 1                                                    | 7773 | -0.640 | -0.4822 | Yes |
| 17 | <a href="#">GOT1</a>  | GOT1<br><a href="#">Entrez</a> ,<br><a href="#">Source</a>  | glutamic-oxaloacetic transaminase 1, soluble (aspartate aminotransferase 1)       | 7856 | -0.678 | -0.4190 | Yes |
| 18 | <a href="#">GFPT1</a> | GFPT1<br><a href="#">Entrez</a> ,<br><a href="#">Source</a> | glutamine-fructose-6-phosphate transaminase 1                                     | 7935 | -0.712 | -0.3518 | Yes |
| 19 | <a href="#">GAD2</a>  | GAD2<br><a href="#">Entrez</a> ,<br><a href="#">Source</a>  | glutamate decarboxylase 2 (pancreatic islets and brain, 65kDa)                    | 8220 | -0.898 | -0.2886 | Yes |
| 20 | <a href="#">GOT2</a>  | GOT2<br><a href="#">Entrez</a> ,<br><a href="#">Source</a>  | glutamic-oxaloacetic transaminase 2, mitochondrial (aspartate aminotransferase 2) | 8235 | -0.909 | -0.1928 | Yes |
| 21 | <a href="#">GPT2</a>  | GPT2<br><a href="#">Entrez</a> ,<br><a href="#">Source</a>  | glutamic pyruvate transaminase (alanine aminotransferase) 2                       | 8407 | -1.082 | -0.0967 | Yes |
| 22 | <a href="#">GAD1</a>  | GAD1<br><a href="#">Entrez</a> ,<br><a href="#">Source</a>  | glutamate decarboxylase 1 (brain, 67kDa)                                          | 8441 | -1.150 | 0.0227  | Yes |

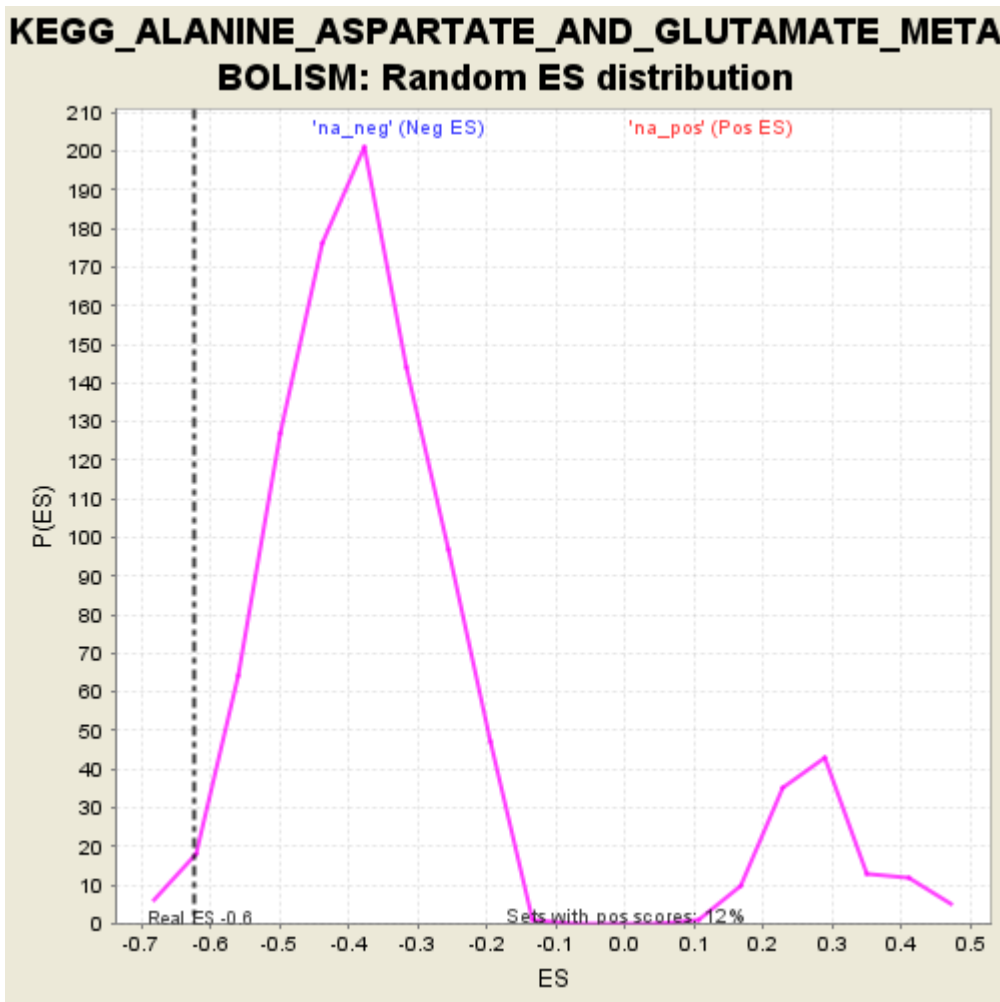

**Fig 2: KEGG\_ALANINE\_ASPARTATE\_AND\_GLU... METABOLISM: Random ES distribution**  
**Gene set null distribution of ES for KEGG\_ALANINE\_ASPARTATE\_AND\_GLU... METABOLISM**

**Table: GSEA Results Summary**

|                                   |                         |
|-----------------------------------|-------------------------|
| Dataset                           | GSEA_18M_collapsed      |
| Phenotype                         | NoPhenotypeAvailable    |
| Upregulated in class              | na_neg                  |
| GeneSet                           | KEGG_ENDOMETRIAL_CANCER |
| Enrichment Score (ES)             | -0.5580239              |
| Normalized Enrichment Score (NES) | -1.5566992              |
| Nominal p-value                   | 0.005393743             |
| FDR q-value                       | 0.13755791              |
| FWER p-Value                      | 0.644                   |

**Fig 1: Enrichment plot: KEGG\_ENDOMETRIAL\_CANCER**  
**Profile of the Running ES Score & Positions of GeneSet Members on the Rank Ordered List**

**Table: GSEA details [\[plain text format\]](#)**

|   | PROBE                  | GENE SYMBOL                              | GENE_TITLE                                                              | RANK IN GENE LIST | RANK METRIC SCORE | RUNNING ES | CORE ENRICHMENT |
|---|------------------------|------------------------------------------|-------------------------------------------------------------------------|-------------------|-------------------|------------|-----------------|
| 1 | <a href="#">SOS2</a>   | SOS2<br><a href="#">Entrez, Source</a>   | son of sevenless homolog 2 (Drosophila)                                 | 811               | 0.278             | -0.0776    | No              |
| 2 | <a href="#">PTEN</a>   | PTEN<br><a href="#">Entrez, Source</a>   | phosphatase and tensin homolog (mutated in multiple advanced cancers 1) | 855               | 0.271             | -0.0663    | No              |
| 3 | <a href="#">AXIN1</a>  | AXIN1<br><a href="#">Entrez, Source</a>  | axin 1                                                                  | 1233              | 0.204             | -0.0978    | No              |
| 4 | <a href="#">PIK3CD</a> | PIK3CD<br><a href="#">Entrez, Source</a> | phosphoinositide-3-kinase, catalytic, delta polypeptide                 | 1265              | 0.200             | -0.0894    | No              |
| 5 | <a href="#">PIK3R5</a> | PIK3R5<br><a href="#">Entrez, Source</a> | phosphoinositide-3-kinase, regulatory subunit 5, p101                   | 1401              | 0.182             | -0.0942    | No              |
| 6 | <a href="#">RAF1</a>   | RAF1<br><a href="#">Entrez, Source</a>   | v-raf-1 murine leukemia viral oncogene homolog 1                        | 1794              | 0.134             | -0.1317    | No              |
| 7 | <a href="#">PIK3R2</a> | PIK3R2<br><a href="#">Entrez, Source</a> | phosphoinositide-3-kinase, regulatory subunit 2 (p85 beta)              | 1989              | 0.114             | -0.1474    | No              |



|    |                        |                                                              |                                                                                                             |      |        |         |    |
|----|------------------------|--------------------------------------------------------------|-------------------------------------------------------------------------------------------------------------|------|--------|---------|----|
| 8  | <a href="#">PIK3CG</a> | PIK3CG<br><a href="#">Entrez</a> ,<br><a href="#">Source</a> | phosphoinositide-3-kinase,<br>catalytic, gamma polypeptide                                                  | 2211 | 0.092  | -0.1676 | No |
| 9  | <a href="#">PDPK1</a>  | PDPK1<br><a href="#">Entrez</a> ,<br><a href="#">Source</a>  | 3-phosphoinositide dependent<br>protein kinase-1                                                            | 3347 | -0.015 | -0.2988 | No |
| 10 | <a href="#">EGFR</a>   | EGFR<br><a href="#">Entrez</a> ,<br><a href="#">Source</a>   | epidermal growth factor<br>receptor (erythroblastic<br>leukemia viral (v-erb-b)<br>oncogene homolog, avian) | 3352 | -0.015 | -0.2983 | No |
| 11 | <a href="#">CCND1</a>  | CCND1<br><a href="#">Entrez</a> ,<br><a href="#">Source</a>  | cyclin D1                                                                                                   | 3616 | -0.038 | -0.3266 | No |
| 12 | <a href="#">TCF7</a>   | TCF7<br><a href="#">Entrez</a> ,<br><a href="#">Source</a>   | transcription factor 7 (T-cell<br>specific, HMG-box)                                                        | 3636 | -0.040 | -0.3264 | No |
| 13 | <a href="#">GSK3B</a>  | GSK3B<br><a href="#">Entrez</a> ,<br><a href="#">Source</a>  | glycogen synthase kinase 3<br>beta                                                                          | 4405 | -0.104 | -0.4095 | No |
| 14 | <a href="#">CDH1</a>   | CDH1<br><a href="#">Entrez</a> ,<br><a href="#">Source</a>   | cadherin 1, type 1, E-cadherin<br>(epithelial)                                                              | 4474 | -0.111 | -0.4107 | No |
| 15 | <a href="#">MAPK3</a>  | MAPK3<br><a href="#">Entrez</a> ,<br><a href="#">Source</a>  | mitogen-activated protein<br>kinase 3                                                                       | 4509 | -0.114 | -0.4078 | No |
| 16 | <a href="#">CASP9</a>  | CASP9<br><a href="#">Entrez</a> ,<br><a href="#">Source</a>  | caspase 9, apoptosis-related<br>cysteine peptidase                                                          | 4581 | -0.119 | -0.4088 | No |
| 17 | <a href="#">GRB2</a>   | GRB2<br><a href="#">Entrez</a> ,<br><a href="#">Source</a>   | growth factor receptor-bound<br>protein 2                                                                   | 4744 | -0.134 | -0.4196 | No |
| 18 | <a href="#">NRAS</a>   | NRAS<br><a href="#">Entrez</a> ,<br><a href="#">Source</a>   | neuroblastoma RAS viral<br>(v-ras) oncogene homolog                                                         | 4809 | -0.140 | -0.4187 | No |
| 19 | <a href="#">LEF1</a>   | LEF1<br><a href="#">Entrez</a> ,<br><a href="#">Source</a>   | lymphoid enhancer-binding<br>factor 1                                                                       | 5170 | -0.173 | -0.4501 | No |
| 20 | <a href="#">MAP2K1</a> | MAP2K1<br><a href="#">Entrez</a> ,<br><a href="#">Source</a> | mitogen-activated protein<br>kinase kinase 1                                                                | 5558 | -0.211 | -0.4824 | No |
| 21 | <a href="#">TCF7L2</a> | TCF7L2<br><a href="#">Entrez</a> ,<br><a href="#">Source</a> | transcription factor 7-like 2<br>(T-cell specific, HMG-box)                                                 | 5722 | -0.227 | -0.4877 | No |
| 22 | <a href="#">APC2</a>   | APC2<br><a href="#">Entrez</a> ,<br><a href="#">Source</a>   | adenomatosis polyposis coli 2                                                                               | 6107 | -0.269 | -0.5162 | No |
| 23 | <a href="#">MYC</a>    | MYC<br><a href="#">Entrez</a> ,<br><a href="#">Source</a>    | v-myc myelocytomatosis viral<br>oncogene homolog (avian)                                                    | 6413 | -0.306 | -0.5332 | No |

|    |                        |                                                                              |                                                              |      |        |         |     |
|----|------------------------|------------------------------------------------------------------------------|--------------------------------------------------------------|------|--------|---------|-----|
| 24 | <a href="#">PIK3CB</a> | <a href="#">PIK3CB</a><br><a href="#">Entrez</a> ,<br><a href="#">Source</a> | phosphoinositide-3-kinase, catalytic, beta polypeptide       | 6592 | -0.333 | -0.5338 | No  |
| 25 | <a href="#">PIK3CA</a> | <a href="#">PIK3CA</a><br><a href="#">Entrez</a> ,<br><a href="#">Source</a> | phosphoinositide-3-kinase, catalytic, alpha polypeptide      | 6801 | -0.370 | -0.5357 | Yes |
| 26 | <a href="#">AXIN2</a>  | <a href="#">AXIN2</a><br><a href="#">Entrez</a> ,<br><a href="#">Source</a>  | axin 2 (conductin, axil)                                     | 6948 | -0.397 | -0.5288 | Yes |
| 27 | <a href="#">ELK1</a>   | <a href="#">ELK1</a><br><a href="#">Entrez</a> ,<br><a href="#">Source</a>   | ELK1, member of ETS oncogene family                          | 7187 | -0.449 | -0.5295 | Yes |
| 28 | <a href="#">PIK3R3</a> | <a href="#">PIK3R3</a><br><a href="#">Entrez</a> ,<br><a href="#">Source</a> | phosphoinositide-3-kinase, regulatory subunit 3 (p55, gamma) | 7209 | -0.454 | -0.5046 | Yes |
| 29 | <a href="#">MAPK1</a>  | <a href="#">MAPK1</a><br><a href="#">Entrez</a> ,<br><a href="#">Source</a>  | mitogen-activated protein kinase 1                           | 7446 | -0.522 | -0.5006 | Yes |
| 30 | <a href="#">CTNNA2</a> | <a href="#">CTNNA2</a><br><a href="#">Entrez</a> ,<br><a href="#">Source</a> | catenin (cadherin-associated protein), alpha 2               | 7492 | -0.538 | -0.4734 | Yes |
| 31 | <a href="#">CTNNA3</a> | <a href="#">CTNNA3</a><br><a href="#">Entrez</a> ,<br><a href="#">Source</a> | catenin (cadherin-associated protein), alpha 3               | 7546 | -0.555 | -0.4461 | Yes |
| 32 | <a href="#">SOS1</a>   | <a href="#">SOS1</a><br><a href="#">Entrez</a> ,<br><a href="#">Source</a>   | son of sevenless homolog 1 (Drosophila)                      | 7606 | -0.574 | -0.4184 | Yes |
| 33 | <a href="#">APC</a>    | <a href="#">APC</a><br><a href="#">Entrez</a> ,<br><a href="#">Source</a>    | adenomatosis polyposis coli                                  | 7732 | -0.619 | -0.3957 | Yes |
| 34 | <a href="#">AKT1</a>   | <a href="#">AKT1</a><br><a href="#">Entrez</a> ,<br><a href="#">Source</a>   | v-akt murine thymoma viral oncogene homolog 1                | 8115 | -0.817 | -0.3909 | Yes |
| 35 | <a href="#">AKT2</a>   | <a href="#">AKT2</a><br><a href="#">Entrez</a> ,<br><a href="#">Source</a>   | v-akt murine thymoma viral oncogene homolog 2                | 8121 | -0.821 | -0.3421 | Yes |
| 36 | <a href="#">ARAF</a>   | <a href="#">ARAF</a><br><a href="#">Entrez</a> ,<br><a href="#">Source</a>   | v-raf murine sarcoma 3611 viral oncogene homolog             | 8164 | -0.845 | -0.2960 | Yes |
| 37 | <a href="#">BRAF</a>   | <a href="#">BRAF</a><br><a href="#">Entrez</a> ,<br><a href="#">Source</a>   | v-raf murine sarcoma viral oncogene homolog B1               | 8297 | -0.967 | -0.2532 | Yes |
| 38 | <a href="#">CTNNB1</a> | <a href="#">CTNNB1</a><br><a href="#">Entrez</a> ,<br><a href="#">Source</a> | catenin (cadherin-associated protein), beta 1, 88kDa         | 8376 | -1.047 | -0.1992 | Yes |
| 39 | <a href="#">KRAS</a>   | <a href="#">KRAS</a><br><a href="#">Entrez</a> ,<br><a href="#">Source</a>   | v-Ki-ras2 Kirsten rat sarcoma viral oncogene homolog         | 8444 | -1.153 | -0.1375 | Yes |
| 40 | <a href="#">PIK3R1</a> | <a href="#">PIK3R1</a><br><a href="#">Entrez</a> ,<br><a href="#">Source</a> | phosphoinositide-3-kinase, regulatory subunit 1 (p85 alpha)  | 8463 | -1.179 | -0.0686 | Yes |

|    |                      |                                                                            |                                                                         |      |        |        |     |
|----|----------------------|----------------------------------------------------------------------------|-------------------------------------------------------------------------|------|--------|--------|-----|
| 41 | <a href="#">AKT3</a> | <a href="#">AKT3</a><br><a href="#">Entrez</a> ,<br><a href="#">Source</a> | v-akt murine thymoma viral oncogene homolog 3 (protein kinase B, gamma) | 8586 | -1.473 | 0.0059 | Yes |
|----|----------------------|----------------------------------------------------------------------------|-------------------------------------------------------------------------|------|--------|--------|-----|

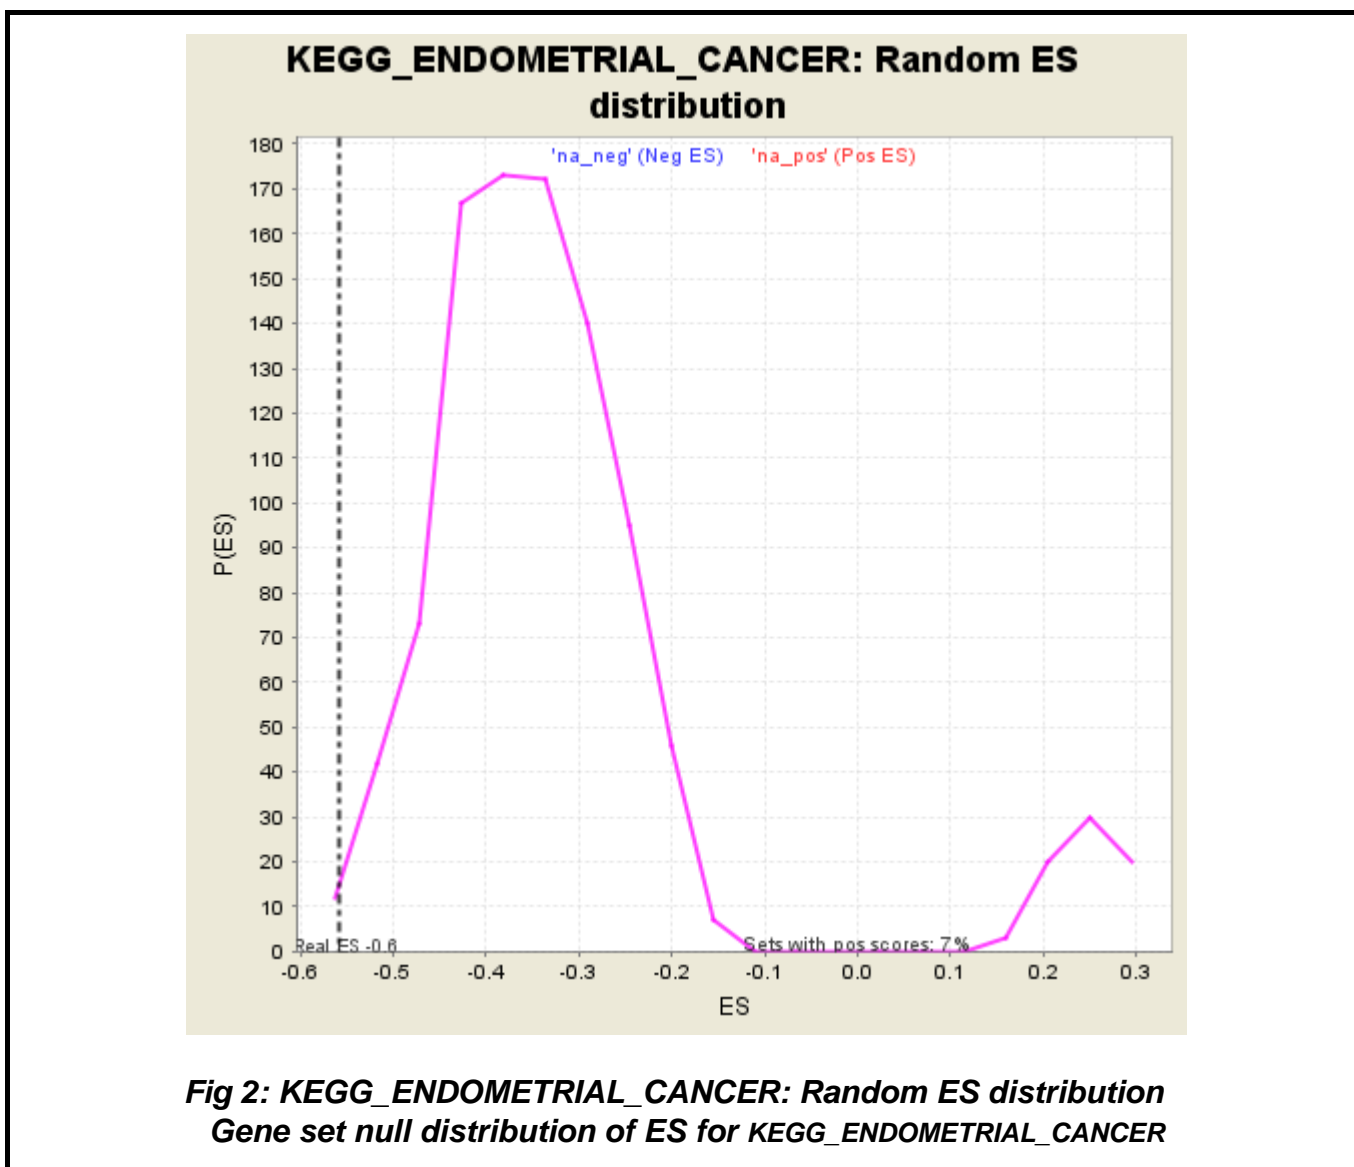

**Fig 2: KEGG\_ENDOMETRIAL\_CANCER: Random ES distribution**  
Gene set null distribution of ES for KEGG\_ENDOMETRIAL\_CANCER

**Table: GSEA Results Summary**

|                                   |                      |
|-----------------------------------|----------------------|
| Dataset                           | GSEA_18M_collapsed   |
| Phenotype                         | NoPhenotypeAvailable |
| Upregulated in class              | na_neg               |
| GeneSet                           | KEGG_GAP_JUNCTION    |
| Enrichment Score (ES)             | -0.54057395          |
| Normalized Enrichment Score (NES) | -1.5557499           |
| Nominal p-value                   | 0.004162331          |
| FDR q-value                       | 0.1217212            |
| FWER p-Value                      | 0.649                |

**Fig 1: Enrichment plot: KEGG\_GAP\_JUNCTION**  
**Profile of the Running ES Score & Positions of GeneSet Members on the Rank Ordered List**

**Table: GSEA details [\[plain text format\]](#)**

|   | PROBE                  | GENE SYMBOL                              | GENE_TITLE                                                | RANK IN GENE LIST | RANK METRIC SCORE | RUNNING ES | CORE ENRICHMENT |
|---|------------------------|------------------------------------------|-----------------------------------------------------------|-------------------|-------------------|------------|-----------------|
| 1 | <a href="#">HTR2C</a>  | HTR2C<br><a href="#">Entrez, Source</a>  | 5-hydroxytryptamine (serotonin) receptor 2C               | 17                | 0.987             | 0.0359     | No              |
| 2 | <a href="#">PDGFRB</a> | PDGFRB<br><a href="#">Entrez, Source</a> | platelet-derived growth factor receptor, beta polypeptide | 324               | 0.427             | 0.0167     | No              |
| 3 | <a href="#">GNAS</a>   | GNAS<br><a href="#">Entrez, Source</a>   | GNAS complex locus                                        | 403               | 0.384             | 0.0224     | No              |
| 4 | <a href="#">ADRB1</a>  | ADRB1<br><a href="#">Entrez, Source</a>  | adrenergic, beta-1-, receptor                             | 604               | 0.320             | 0.0114     | No              |
| 5 | <a href="#">PDGFC</a>  | PDGFC<br><a href="#">Entrez, Source</a>  | platelet derived growth factor C                          | 669               | 0.304             | 0.0156     | No              |
| 6 | <a href="#">PLCB3</a>  | PLCB3<br><a href="#">Entrez, Source</a>  | phospholipase C, beta 3 (phosphatidylinositol-specific)   | 733               | 0.292             | 0.0195     | No              |
| 7 | <a href="#">SOS2</a>   | SOS2<br><a href="#">Entrez, Source</a>   | son of sevenless homolog 2 (Drosophila)                   | 811               | 0.278             | 0.0212     | No              |

|    |                        |                                                              |                                                                                                             |      |        |         |    |
|----|------------------------|--------------------------------------------------------------|-------------------------------------------------------------------------------------------------------------|------|--------|---------|----|
| 8  | <a href="#">ADCY1</a>  | ADCY1<br><a href="#">Entrez</a> ,<br><a href="#">Source</a>  | adenylate cyclase 1 (brain)                                                                                 | 868  | 0.269  | 0.0250  | No |
| 9  | <a href="#">PRKACA</a> | PRKACA<br><a href="#">Entrez</a> ,<br><a href="#">Source</a> | protein kinase,<br>cAMP-dependent, catalytic,<br>alpha                                                      | 893  | 0.264  | 0.0324  | No |
| 10 | <a href="#">TJP1</a>   | TJP1<br><a href="#">Entrez</a> ,<br><a href="#">Source</a>   | tight junction protein 1 (zona<br>occludens 1)                                                              | 934  | 0.255  | 0.0375  | No |
| 11 | <a href="#">ADCY5</a>  | ADCY5<br><a href="#">Entrez</a> ,<br><a href="#">Source</a>  | adenylate cyclase 5                                                                                         | 1188 | 0.212  | 0.0162  | No |
| 12 | <a href="#">TUBB2A</a> | TUBB2A<br><a href="#">Entrez</a> ,<br><a href="#">Source</a> | tubulin, beta 2A                                                                                            | 1497 | 0.171  | -0.0131 | No |
| 13 | <a href="#">ITPR2</a>  | ITPR2<br><a href="#">Entrez</a> ,<br><a href="#">Source</a>  | inositol 1,4,5-triphosphate<br>receptor, type 2                                                             | 1615 | 0.156  | -0.0208 | No |
| 14 | <a href="#">RAF1</a>   | RAF1<br><a href="#">Entrez</a> ,<br><a href="#">Source</a>   | v-raf-1 murine leukemia viral<br>oncogene homolog 1                                                         | 1794 | 0.134  | -0.0363 | No |
| 15 | <a href="#">PRKG1</a>  | PRKG1<br><a href="#">Entrez</a> ,<br><a href="#">Source</a>  | protein kinase,<br>cGMP-dependent, type I                                                                   | 1869 | 0.127  | -0.0401 | No |
| 16 | <a href="#">ADCY6</a>  | ADCY6<br><a href="#">Entrez</a> ,<br><a href="#">Source</a>  | adenylate cyclase 6                                                                                         | 2045 | 0.108  | -0.0564 | No |
| 17 | <a href="#">ADCY7</a>  | ADCY7<br><a href="#">Entrez</a> ,<br><a href="#">Source</a>  | adenylate cyclase 7                                                                                         | 2380 | 0.075  | -0.0924 | No |
| 18 | <a href="#">GRM1</a>   | GRM1<br><a href="#">Entrez</a> ,<br><a href="#">Source</a>   | glutamate receptor,<br>metabotropic 1                                                                       | 2606 | 0.052  | -0.1166 | No |
| 19 | <a href="#">MAPK7</a>  | MAPK7<br><a href="#">Entrez</a> ,<br><a href="#">Source</a>  | mitogen-activated protein<br>kinase 7                                                                       | 2852 | 0.029  | -0.1441 | No |
| 20 | <a href="#">PDGFB</a>  | PDGFB<br><a href="#">Entrez</a> ,<br><a href="#">Source</a>  | platelet-derived growth factor<br>beta polypeptide (simian<br>sarcoma viral (v-sis) oncogene<br>homolog)    | 2886 | 0.026  | -0.1469 | No |
| 21 | <a href="#">EGFR</a>   | EGFR<br><a href="#">Entrez</a> ,<br><a href="#">Source</a>   | epidermal growth factor<br>receptor (erythroblastic<br>leukemia viral (v-erb-b)<br>oncogene homolog, avian) | 3352 | -0.015 | -0.2005 | No |
| 22 | <a href="#">ADCY2</a>  | ADCY2<br><a href="#">Entrez</a> ,<br><a href="#">Source</a>  | adenylate cyclase 2 (brain)                                                                                 | 3580 | -0.035 | -0.2256 | No |
| 23 | <a href="#">PLCB1</a>  | PLCB1<br><a href="#">Entrez</a> ,<br><a href="#">Source</a>  | phospholipase C, beta 1<br>(phosphoinositide-specific)                                                      | 3646 | -0.041 | -0.2316 | No |

|    |                        |                                                              |                                                                                         |      |        |         |     |
|----|------------------------|--------------------------------------------------------------|-----------------------------------------------------------------------------------------|------|--------|---------|-----|
| 24 | <a href="#">DRD2</a>   | DRD2<br><a href="#">Entrez</a> ,<br><a href="#">Source</a>   | dopamine receptor D2                                                                    | 4163 | -0.085 | -0.2885 | No  |
| 25 | <a href="#">ITPR3</a>  | ITPR3<br><a href="#">Entrez</a> ,<br><a href="#">Source</a>  | inositol 1,4,5-triphosphate receptor, type 3                                            | 4184 | -0.087 | -0.2875 | No  |
| 26 | <a href="#">MAPK3</a>  | MAPK3<br><a href="#">Entrez</a> ,<br><a href="#">Source</a>  | mitogen-activated protein kinase 3                                                      | 4509 | -0.114 | -0.3209 | No  |
| 27 | <a href="#">GRB2</a>   | GRB2<br><a href="#">Entrez</a> ,<br><a href="#">Source</a>   | growth factor receptor-bound protein 2                                                  | 4744 | -0.134 | -0.3430 | No  |
| 28 | <a href="#">NRAS</a>   | NRAS<br><a href="#">Entrez</a> ,<br><a href="#">Source</a>   | neuroblastoma RAS viral (v-ras) oncogene homolog                                        | 4809 | -0.140 | -0.3451 | No  |
| 29 | <a href="#">PDGFA</a>  | PDGFA<br><a href="#">Entrez</a> ,<br><a href="#">Source</a>  | platelet-derived growth factor alpha polypeptide                                        | 5171 | -0.173 | -0.3805 | No  |
| 30 | <a href="#">MAP2K1</a> | MAP2K1<br><a href="#">Entrez</a> ,<br><a href="#">Source</a> | mitogen-activated protein kinase kinase 1                                               | 5558 | -0.211 | -0.4174 | No  |
| 31 | <a href="#">GNAI2</a>  | GNAI2<br><a href="#">Entrez</a> ,<br><a href="#">Source</a>  | guanine nucleotide binding protein (G protein), alpha inhibiting activity polypeptide 2 | 5765 | -0.232 | -0.4325 | No  |
| 32 | <a href="#">TUBB3</a>  | TUBB3<br><a href="#">Entrez</a> ,<br><a href="#">Source</a>  | tubulin, beta 3                                                                         | 5999 | -0.258 | -0.4498 | No  |
| 33 | <a href="#">GNAI3</a>  | GNAI3<br><a href="#">Entrez</a> ,<br><a href="#">Source</a>  | guanine nucleotide binding protein (G protein), alpha inhibiting activity polypeptide 3 | 6319 | -0.295 | -0.4756 | No  |
| 34 | <a href="#">MAP3K2</a> | MAP3K2<br><a href="#">Entrez</a> ,<br><a href="#">Source</a> | mitogen-activated protein kinase kinase kinase 2                                        | 6405 | -0.306 | -0.4738 | No  |
| 35 | <a href="#">PRKCA</a>  | PRKCA<br><a href="#">Entrez</a> ,<br><a href="#">Source</a>  | protein kinase C, alpha                                                                 | 6631 | -0.341 | -0.4869 | No  |
| 36 | <a href="#">PRKG2</a>  | PRKG2<br><a href="#">Entrez</a> ,<br><a href="#">Source</a>  | protein kinase, cGMP-dependent, type II                                                 | 6933 | -0.394 | -0.5068 | No  |
| 37 | <a href="#">ADCY8</a>  | ADCY8<br><a href="#">Entrez</a> ,<br><a href="#">Source</a>  | adenylate cyclase 8 (brain)                                                             | 7224 | -0.457 | -0.5230 | Yes |
| 38 | <a href="#">TUBA8</a>  | TUBA8<br><a href="#">Entrez</a> ,<br><a href="#">Source</a>  | tubulin, alpha 8                                                                        | 7330 | -0.487 | -0.5165 | Yes |
| 39 | <a href="#">GNAI1</a>  | GNAI1<br><a href="#">Entrez</a> ,<br><a href="#">Source</a>  | guanine nucleotide binding protein (G protein), alpha inhibiting activity polypeptide 1 | 7333 | -0.488 | -0.4980 | Yes |
| 40 | <a href="#">GRM5</a>   | GRM5<br><a href="#">Entrez</a> ,<br><a href="#">Source</a>   | glutamate receptor, metabotropic 5                                                      | 7423 | -0.514 | -0.4886 | Yes |

|    |                         |                                                               |                                                               |      |        |         |     |
|----|-------------------------|---------------------------------------------------------------|---------------------------------------------------------------|------|--------|---------|-----|
| 41 | <a href="#">PDGFD</a>   | PDGFD<br><a href="#">Entrez</a> ,<br><a href="#">Source</a>   | platelet derived growth factor D                              | 7429 | -0.517 | -0.4693 | Yes |
| 42 | <a href="#">MAPK1</a>   | MAPK1<br><a href="#">Entrez</a> ,<br><a href="#">Source</a>   | mitogen-activated protein kinase 1                            | 7446 | -0.522 | -0.4511 | Yes |
| 43 | <a href="#">PDGFRA</a>  | PDGFRA<br><a href="#">Entrez</a> ,<br><a href="#">Source</a>  | platelet-derived growth factor receptor, alpha polypeptide    | 7458 | -0.526 | -0.4322 | Yes |
| 44 | <a href="#">ADCY3</a>   | ADCY3<br><a href="#">Entrez</a> ,<br><a href="#">Source</a>   | adenylate cyclase 3                                           | 7460 | -0.528 | -0.4120 | Yes |
| 45 | <a href="#">SOS1</a>    | SOS1<br><a href="#">Entrez</a> ,<br><a href="#">Source</a>    | son of sevenless homolog 1 (Drosophila)                       | 7606 | -0.574 | -0.4068 | Yes |
| 46 | <a href="#">ITPR1</a>   | ITPR1<br><a href="#">Entrez</a> ,<br><a href="#">Source</a>   | inositol 1,4,5-triphosphate receptor, type 1                  | 7830 | -0.669 | -0.4071 | Yes |
| 47 | <a href="#">PLCB4</a>   | PLCB4<br><a href="#">Entrez</a> ,<br><a href="#">Source</a>   | phospholipase C, beta 4                                       | 7874 | -0.685 | -0.3858 | Yes |
| 48 | <a href="#">PRKX</a>    | PRKX<br><a href="#">Entrez</a> ,<br><a href="#">Source</a>    | protein kinase, X-linked                                      | 7937 | -0.713 | -0.3656 | Yes |
| 49 | <a href="#">GUCY1B3</a> | GUCY1B3<br><a href="#">Entrez</a> ,<br><a href="#">Source</a> | guanylate cyclase 1, soluble, beta 3                          | 8244 | -0.915 | -0.3661 | Yes |
| 50 | <a href="#">MAP2K5</a>  | MAP2K5<br><a href="#">Entrez</a> ,<br><a href="#">Source</a>  | mitogen-activated protein kinase kinase 5                     | 8321 | -0.987 | -0.3370 | Yes |
| 51 | <a href="#">KRAS</a>    | KRAS<br><a href="#">Entrez</a> ,<br><a href="#">Source</a>    | v-Ki-ras2 Kirsten rat sarcoma viral oncogene homolog          | 8444 | -1.153 | -0.3069 | Yes |
| 52 | <a href="#">GUCY1A3</a> | GUCY1A3<br><a href="#">Entrez</a> ,<br><a href="#">Source</a> | guanylate cyclase 1, soluble, alpha 3                         | 8465 | -1.181 | -0.2638 | Yes |
| 53 | <a href="#">CSNK1D</a>  | CSNK1D<br><a href="#">Entrez</a> ,<br><a href="#">Source</a>  | casein kinase 1, delta                                        | 8514 | -1.258 | -0.2210 | Yes |
| 54 | <a href="#">GNAQ</a>    | GNAQ<br><a href="#">Entrez</a> ,<br><a href="#">Source</a>    | guanine nucleotide binding protein (G protein), q polypeptide | 8542 | -1.352 | -0.1722 | Yes |
| 55 | <a href="#">TUBB2B</a>  | TUBB2B<br><a href="#">Entrez</a> ,<br><a href="#">Source</a>  | tubulin, beta 2B                                              | 8577 | -1.422 | -0.1215 | Yes |
| 56 | <a href="#">GJA1</a>    | GJA1<br><a href="#">Entrez</a> ,<br><a href="#">Source</a>    | gap junction protein, alpha 1, 43kDa (connexin 43)            | 8612 | -1.658 | -0.0617 | Yes |
| 57 | <a href="#">PRKACB</a>  | PRKACB<br><a href="#">Entrez</a> ,<br><a href="#">Source</a>  | protein kinase, cAMP-dependent, catalytic, beta               | 8614 | -1.677 | 0.0027  | Yes |

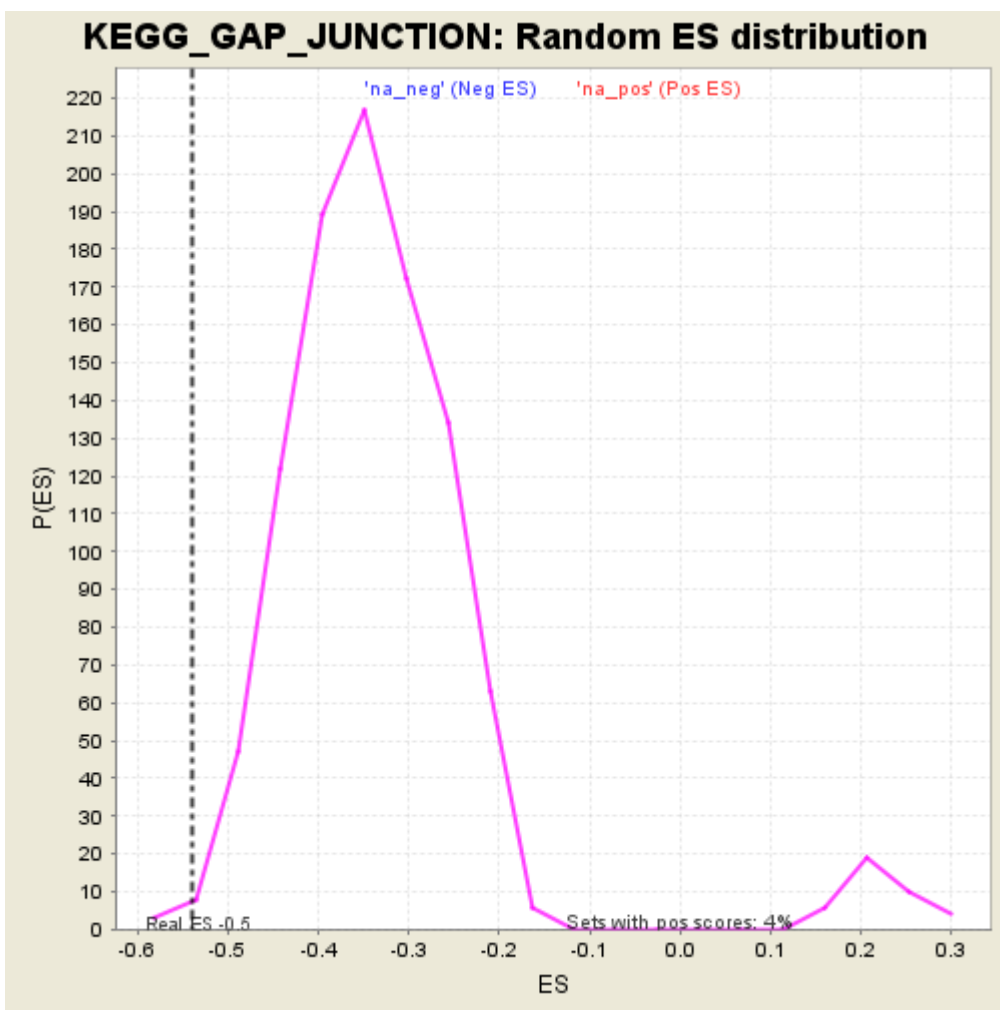

**Fig 2: KEGG\_GAP\_JUNCTION: Random ES distribution**  
**Gene set null distribution of ES for KEGG\_GAP\_JUNCTION**



**Table: GSEA Results Summary**

|                                   |                        |
|-----------------------------------|------------------------|
| Dataset                           | GSEA_18M_collapsed     |
| Phenotype                         | NoPhenotypeAvailable   |
| Upregulated in class              | na_neg                 |
| GeneSet                           | KEGG_COLORECTAL_CANCER |
| Enrichment Score (ES)             | -0.5416446             |
| Normalized Enrichment Score (NES) | -1.5400101             |
| Nominal p-value                   | 0.0041710115           |
| FDR q-value                       | 0.13035494             |
| FWER p-Value                      | 0.723                  |

**Fig 1: Enrichment plot: KEGG\_COLORECTAL\_CANCER**  
**Profile of the Running ES Score & Positions of GeneSet Members on the Rank Ordered List**

**Table: GSEA details [\[plain text format\]](#)**

|   | PROBE                  | GENE SYMBOL                              | GENE_TITLE                                              | RANK IN GENE LIST | RANK METRIC SCORE | RUNNING ES | CORE ENRICHMENT |
|---|------------------------|------------------------------------------|---------------------------------------------------------|-------------------|-------------------|------------|-----------------|
| 1 | <a href="#">BCL2</a>   | BCL2<br><a href="#">Entrez, Source</a>   | B-cell CLL/lymphoma 2                                   | 787               | 0.283             | -0.0784    | No              |
| 2 | <a href="#">MAPK8</a>  | MAPK8<br><a href="#">Entrez, Source</a>  | mitogen-activated protein kinase 8                      | 906               | 0.262             | -0.0799    | No              |
| 3 | <a href="#">AXIN1</a>  | AXIN1<br><a href="#">Entrez, Source</a>  | axin 1                                                  | 1233              | 0.204             | -0.1082    | No              |
| 4 | <a href="#">PIK3CD</a> | PIK3CD<br><a href="#">Entrez, Source</a> | phosphoinositide-3-kinase, catalytic, delta polypeptide | 1265              | 0.200             | -0.1025    | No              |
| 5 | <a href="#">PIK3R5</a> | PIK3R5<br><a href="#">Entrez, Source</a> | phosphoinositide-3-kinase, regulatory subunit 5, p101   | 1401              | 0.182             | -0.1097    | No              |
| 6 | <a href="#">FOS</a>    | FOS<br><a href="#">Entrez, Source</a>    | v-fos FBJ murine osteosarcoma viral oncogene homolog    | 1548              | 0.164             | -0.1190    | No              |
| 7 | <a href="#">RAF1</a>   | RAF1<br><a href="#">Entrez, Source</a>   | v-raf-1 murine leukemia viral oncogene homolog 1        | 1794              | 0.134             | -0.1412    | No              |

|    |                        |                                                    |                                                             |      |        |         |    |
|----|------------------------|----------------------------------------------------|-------------------------------------------------------------|------|--------|---------|----|
| 8  | <a href="#">PIK3R2</a> | <a href="#">Entrez</a> ,<br><a href="#">Source</a> | phosphoinositide-3-kinase, regulatory subunit 2 (p85 beta)  | 1989 | 0.114  | -0.1585 | No |
| 9  | <a href="#">PIK3CG</a> | <a href="#">Entrez</a> ,<br><a href="#">Source</a> | phosphoinositide-3-kinase, catalytic, gamma polypeptide     | 2211 | 0.092  | -0.1799 | No |
| 10 | <a href="#">CYCS</a>   | <a href="#">Entrez</a> ,<br><a href="#">Source</a> | cytochrome c, somatic                                       | 2610 | 0.052  | -0.2238 | No |
| 11 | <a href="#">MSH3</a>   | <a href="#">Entrez</a> ,<br><a href="#">Source</a> | mutS homolog 3 (E. coli)                                    | 3020 | 0.013  | -0.2709 | No |
| 12 | <a href="#">TGFB2</a>  | <a href="#">Entrez</a> ,<br><a href="#">Source</a> | transforming growth factor, beta 2                          | 3370 | -0.016 | -0.3108 | No |
| 13 | <a href="#">TGFB2</a>  | <a href="#">Entrez</a> ,<br><a href="#">Source</a> | transforming growth factor, beta receptor II (70/80kDa)     | 3485 | -0.025 | -0.3229 | No |
| 14 | <a href="#">CCND1</a>  | <a href="#">Entrez</a> ,<br><a href="#">Source</a> | cyclin D1                                                   | 3616 | -0.038 | -0.3362 | No |
| 15 | <a href="#">TCF7</a>   | <a href="#">Entrez</a> ,<br><a href="#">Source</a> | transcription factor 7 (T-cell specific, HMG-box)           | 3636 | -0.040 | -0.3366 | No |
| 16 | <a href="#">GSK3B</a>  | <a href="#">Entrez</a> ,<br><a href="#">Source</a> | glycogen synthase kinase 3 beta                             | 4405 | -0.104 | -0.4211 | No |
| 17 | <a href="#">MAPK3</a>  | <a href="#">Entrez</a> ,<br><a href="#">Source</a> | mitogen-activated protein kinase 3                          | 4509 | -0.114 | -0.4278 | No |
| 18 | <a href="#">CASP9</a>  | <a href="#">Entrez</a> ,<br><a href="#">Source</a> | caspase 9, apoptosis-related cysteine peptidase             | 4581 | -0.119 | -0.4304 | No |
| 19 | <a href="#">SMAD4</a>  | <a href="#">Entrez</a> ,<br><a href="#">Source</a> | SMAD, mothers against DPP homolog 4 (Drosophila)            | 4671 | -0.127 | -0.4348 | No |
| 20 | <a href="#">TGFB3</a>  | <a href="#">Entrez</a> ,<br><a href="#">Source</a> | transforming growth factor, beta 3                          | 4880 | -0.147 | -0.4522 | No |
| 21 | <a href="#">LEF1</a>   | <a href="#">Entrez</a> ,<br><a href="#">Source</a> | lymphoid enhancer-binding factor 1                          | 5170 | -0.173 | -0.4777 | No |
| 22 | <a href="#">MSH2</a>   | <a href="#">Entrez</a> ,<br><a href="#">Source</a> | mutS homolog 2, colon cancer, nonpolyposis type 1 (E. coli) | 5307 | -0.185 | -0.4848 | No |
| 23 | <a href="#">BIRC5</a>  | <a href="#">Entrez</a> ,<br><a href="#">Source</a> | baculoviral IAP repeat-containing 5 (survivin)              | 5437 | -0.199 | -0.4905 | No |
| 24 | <a href="#">MAP2K1</a> | <a href="#">Entrez</a> ,<br><a href="#">Source</a> | mitogen-activated protein kinase kinase 1                   | 5558 | -0.211 | -0.4946 | No |

|    |                        |                                                              |                                                                                                      |      |        |         |     |
|----|------------------------|--------------------------------------------------------------|------------------------------------------------------------------------------------------------------|------|--------|---------|-----|
| 25 | <a href="#">TCF7L2</a> | TCF7L2<br><a href="#">Entrez</a> ,<br><a href="#">Source</a> | transcription factor 7-like 2<br>(T-cell specific, HMG-box)                                          | 5722 | -0.227 | -0.5030 | No  |
| 26 | <a href="#">CASP3</a>  | CASP3<br><a href="#">Entrez</a> ,<br><a href="#">Source</a>  | caspase 3, apoptosis-related<br>cysteine peptidase                                                   | 6055 | -0.264 | -0.5292 | Yes |
| 27 | <a href="#">APC2</a>   | APC2<br><a href="#">Entrez</a> ,<br><a href="#">Source</a>   | adenomatosis polyposis coli 2                                                                        | 6107 | -0.269 | -0.5225 | Yes |
| 28 | <a href="#">JUN</a>    | JUN<br><a href="#">Entrez</a> ,<br><a href="#">Source</a>    | jun oncogene                                                                                         | 6134 | -0.272 | -0.5128 | Yes |
| 29 | <a href="#">RAC3</a>   | RAC3<br><a href="#">Entrez</a> ,<br><a href="#">Source</a>   | ras-related C3 botulinum toxin<br>substrate 3 (rho family, small<br>GTP binding protein Rac3)        | 6207 | -0.281 | -0.5080 | Yes |
| 30 | <a href="#">TGFB1</a>  | TGFB1<br><a href="#">Entrez</a> ,<br><a href="#">Source</a>  | transforming growth factor,<br>beta 1 (Camurati-Engelmann<br>disease)                                | 6283 | -0.290 | -0.5032 | Yes |
| 31 | <a href="#">MYC</a>    | MYC<br><a href="#">Entrez</a> ,<br><a href="#">Source</a>    | v-myc myelocytomatosis viral<br>oncogene homolog (avian)                                             | 6413 | -0.306 | -0.5038 | Yes |
| 32 | <a href="#">MAPK10</a> | MAPK10<br><a href="#">Entrez</a> ,<br><a href="#">Source</a> | mitogen-activated protein<br>kinase 10                                                               | 6420 | -0.307 | -0.4901 | Yes |
| 33 | <a href="#">PIK3CB</a> | PIK3CB<br><a href="#">Entrez</a> ,<br><a href="#">Source</a> | phosphoinositide-3-kinase,<br>catalytic, beta polypeptide                                            | 6592 | -0.333 | -0.4944 | Yes |
| 34 | <a href="#">PIK3CA</a> | PIK3CA<br><a href="#">Entrez</a> ,<br><a href="#">Source</a> | phosphoinositide-3-kinase,<br>catalytic, alpha polypeptide                                           | 6801 | -0.370 | -0.5012 | Yes |
| 35 | <a href="#">TGFB1</a>  | TGFB1<br><a href="#">Entrez</a> ,<br><a href="#">Source</a>  | transforming growth factor,<br>beta receptor I (activin A<br>receptor type II-like kinase,<br>53kDa) | 6843 | -0.376 | -0.4883 | Yes |
| 36 | <a href="#">DCC</a>    | DCC<br><a href="#">Entrez</a> ,<br><a href="#">Source</a>    | deleted in colorectal<br>carcinoma                                                                   | 6868 | -0.381 | -0.4733 | Yes |
| 37 | <a href="#">MSH6</a>   | MSH6<br><a href="#">Entrez</a> ,<br><a href="#">Source</a>   | mutS homolog 6 (E. coli)                                                                             | 6890 | -0.387 | -0.4575 | Yes |
| 38 | <a href="#">AXIN2</a>  | AXIN2<br><a href="#">Entrez</a> ,<br><a href="#">Source</a>  | axin 2 (conductin, axil)                                                                             | 6948 | -0.397 | -0.4456 | Yes |
| 39 | <a href="#">PIK3R3</a> | PIK3R3<br><a href="#">Entrez</a> ,<br><a href="#">Source</a> | phosphoinositide-3-kinase,<br>regulatory subunit 3 (p55,<br>gamma)                                   | 7209 | -0.454 | -0.4546 | Yes |
| 40 | <a href="#">SMAD2</a>  | SMAD2<br><a href="#">Entrez</a> ,<br><a href="#">Source</a>  | SMAD, mothers against DPP<br>homolog 2 (Drosophila)                                                  | 7390 | -0.505 | -0.4518 | Yes |

|    |                        |                                                              |                                                                                         |      |        |         |     |
|----|------------------------|--------------------------------------------------------------|-----------------------------------------------------------------------------------------|------|--------|---------|-----|
| 41 | <a href="#">MAPK1</a>  | MAPK1<br><a href="#">Entrez</a> ,<br><a href="#">Source</a>  | mitogen-activated protein kinase 1                                                      | 7446 | -0.522 | -0.4337 | Yes |
| 42 | <a href="#">APC</a>    | APC<br><a href="#">Entrez</a> ,<br><a href="#">Source</a>    | adenomatosis polyposis coli                                                             | 7732 | -0.619 | -0.4379 | Yes |
| 43 | <a href="#">AKT1</a>   | AKT1<br><a href="#">Entrez</a> ,<br><a href="#">Source</a>   | v-akt murine thymoma viral oncogene homolog 1                                           | 8115 | -0.817 | -0.4441 | Yes |
| 44 | <a href="#">AKT2</a>   | AKT2<br><a href="#">Entrez</a> ,<br><a href="#">Source</a>   | v-akt murine thymoma viral oncogene homolog 2                                           | 8121 | -0.821 | -0.4061 | Yes |
| 45 | <a href="#">ARAF</a>   | ARAF<br><a href="#">Entrez</a> ,<br><a href="#">Source</a>   | v-raf murine sarcoma 3611 viral oncogene homolog                                        | 8164 | -0.845 | -0.3713 | Yes |
| 46 | <a href="#">RAC1</a>   | RAC1<br><a href="#">Entrez</a> ,<br><a href="#">Source</a>   | ras-related C3 botulinum toxin substrate 1 (rho family, small GTP binding protein Rac1) | 8293 | -0.964 | -0.3410 | Yes |
| 47 | <a href="#">SMAD3</a>  | SMAD3<br><a href="#">Entrez</a> ,<br><a href="#">Source</a>  | SMAD, mothers against DPP homolog 3 (Drosophila)                                        | 8295 | -0.964 | -0.2959 | Yes |
| 48 | <a href="#">BRAF</a>   | BRAF<br><a href="#">Entrez</a> ,<br><a href="#">Source</a>   | v-raf murine sarcoma viral oncogene homolog B1                                          | 8297 | -0.967 | -0.2507 | Yes |
| 49 | <a href="#">CTNNB1</a> | CTNNB1<br><a href="#">Entrez</a> ,<br><a href="#">Source</a> | catenin (cadherin-associated protein), beta 1, 88kDa                                    | 8376 | -1.047 | -0.2106 | Yes |
| 50 | <a href="#">KRAS</a>   | KRAS<br><a href="#">Entrez</a> ,<br><a href="#">Source</a>   | v-Ki-ras2 Kirsten rat sarcoma viral oncogene homolog                                    | 8444 | -1.153 | -0.1643 | Yes |
| 51 | <a href="#">PIK3R1</a> | PIK3R1<br><a href="#">Entrez</a> ,<br><a href="#">Source</a> | phosphoinositide-3-kinase, regulatory subunit 1 (p85 alpha)                             | 8463 | -1.179 | -0.1110 | Yes |
| 52 | <a href="#">MAPK9</a>  | MAPK9<br><a href="#">Entrez</a> ,<br><a href="#">Source</a>  | mitogen-activated protein kinase 9                                                      | 8528 | -1.320 | -0.0565 | Yes |
| 53 | <a href="#">AKT3</a>   | AKT3<br><a href="#">Entrez</a> ,<br><a href="#">Source</a>   | v-akt murine thymoma viral oncogene homolog 3 (protein kinase B, gamma)                 | 8586 | -1.473 | 0.0059  | Yes |

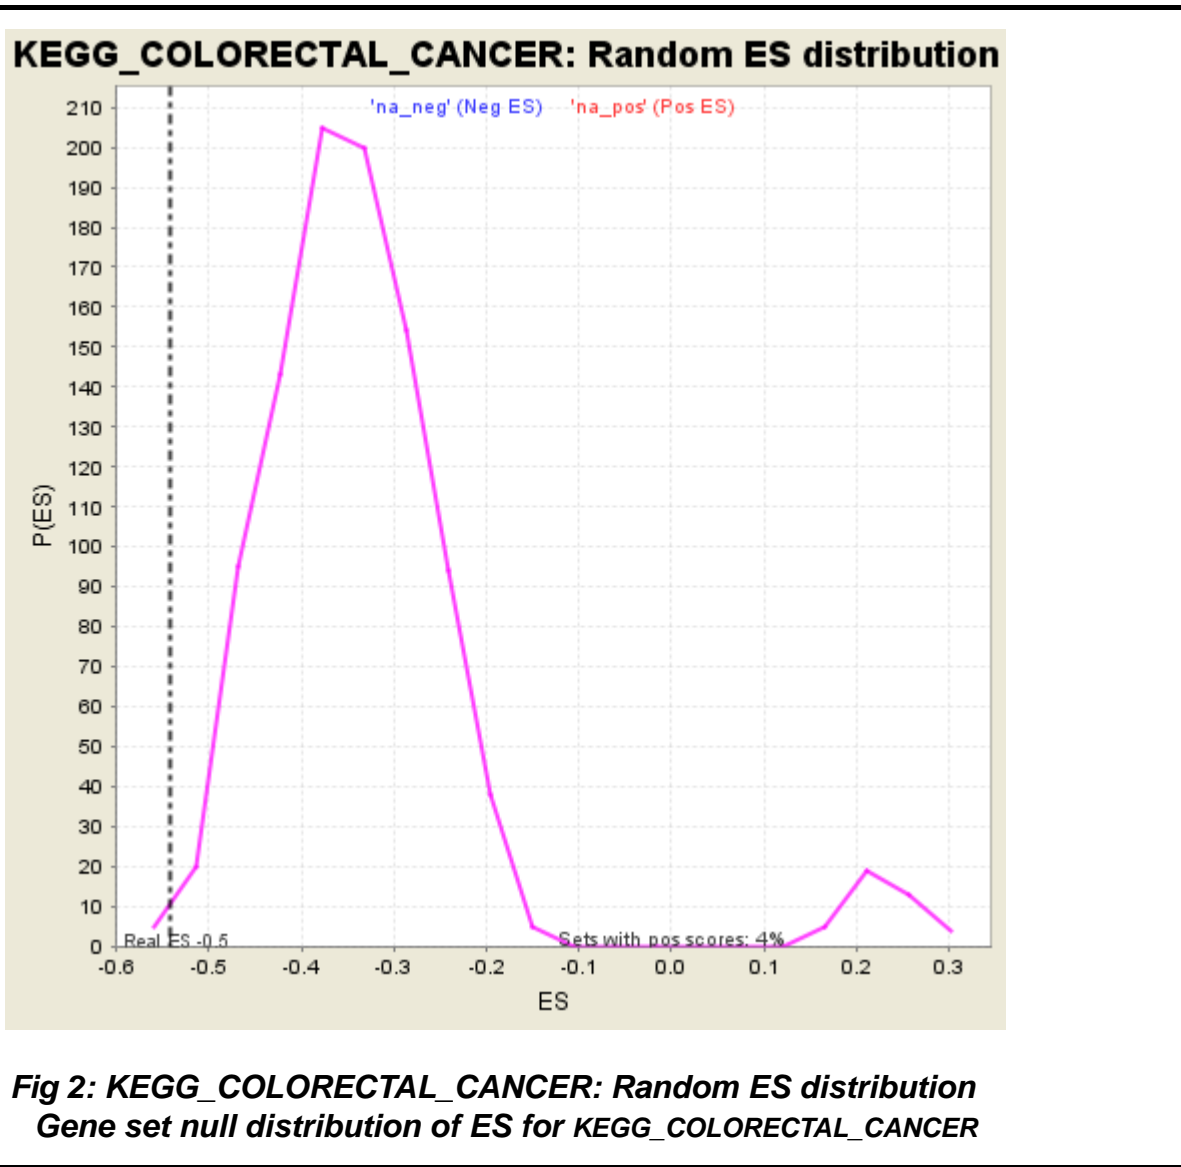

**Fig 2: KEGG\_COLORECTAL\_CANCER: Random ES distribution**  
**Gene set null distribution of ES for KEGG\_COLORECTAL\_CANCER**

**Table: GSEA Results Summary**

|                                   |                             |
|-----------------------------------|-----------------------------|
| Dataset                           | GSEA_18M_collapsed          |
| Phenotype                         | NoPhenotypeAvailable        |
| Upregulated in class              | na_neg                      |
| GeneSet                           | KEGG_ERBB_SIGNALING_PATHWAY |
| Enrichment Score (ES)             | -0.52239454                 |
| Normalized Enrichment Score (NES) | -1.5398098                  |
| Nominal p-value                   | 0.0030737706                |
| FDR q-value                       | 0.11761037                  |
| FWER p-Value                      | 0.723                       |

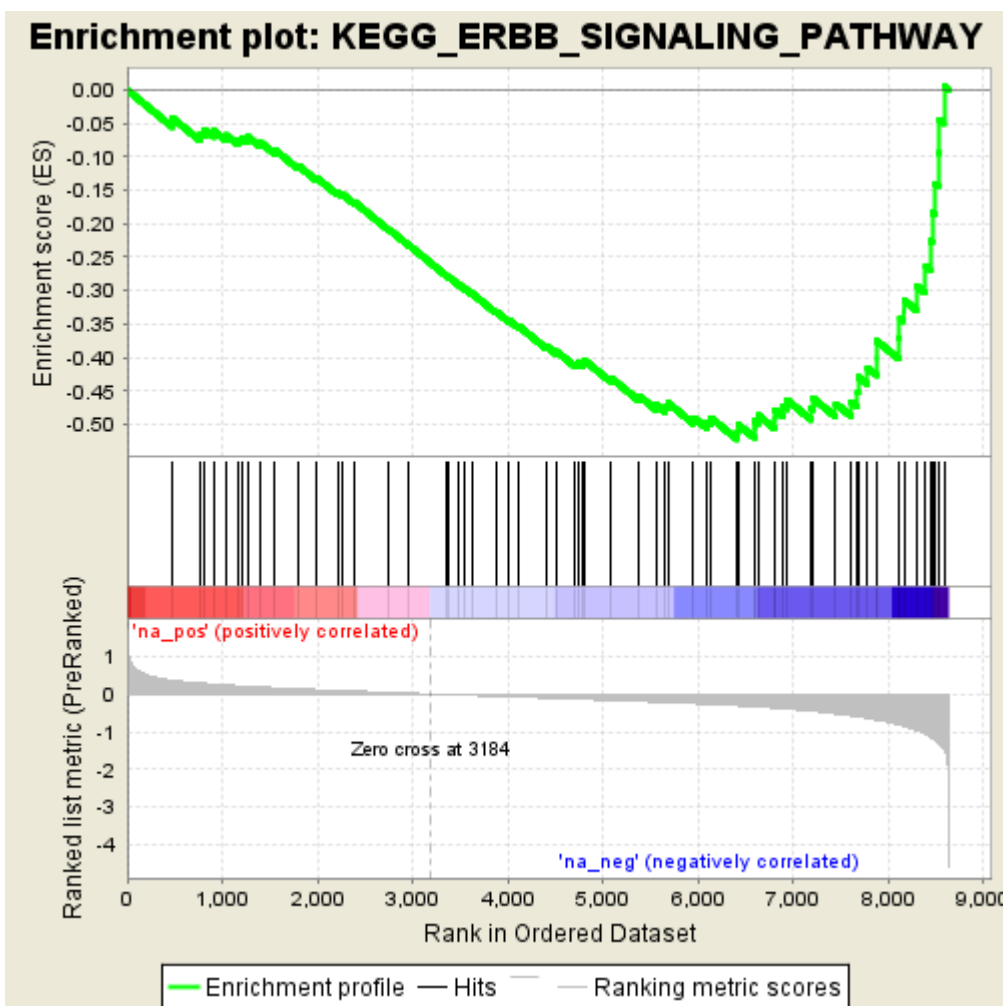

**Fig 1: Enrichment plot: KEGG\_ERBB\_SIGNALING\_PATHWAY**  
**Profile of the Running ES Score & Positions of GeneSet Members on the Rank Ordered List**

**Table: GSEA details [\[plain text format\]](#)**

| PROBE | GENE | GENE_TITLE | RANK | RANK | RUNNING | CORE |
|-------|------|------------|------|------|---------|------|
|-------|------|------------|------|------|---------|------|

|    |                         | SYMBOL                                    |                                                                | IN GENE LIST | METRIC SCORE | ES      | ENRICHMENT |
|----|-------------------------|-------------------------------------------|----------------------------------------------------------------|--------------|--------------|---------|------------|
| 1  | <a href="#">NCK2</a>    | NCK2<br><a href="#">Entrez, Source</a>    | NCK adaptor protein 2                                          | 477          | 0.356        | -0.0422 | No         |
| 2  | <a href="#">TGFA</a>    | TGFA<br><a href="#">Entrez, Source</a>    | transforming growth factor, alpha                              | 769          | 0.287        | -0.0653 | No         |
| 3  | <a href="#">SOS2</a>    | SOS2<br><a href="#">Entrez, Source</a>    | son of sevenless homolog 2 (Drosophila)                        | 811          | 0.278        | -0.0595 | No         |
| 4  | <a href="#">MAPK8</a>   | MAPK8<br><a href="#">Entrez, Source</a>   | mitogen-activated protein kinase 8                             | 906          | 0.262        | -0.0606 | No         |
| 5  | <a href="#">PAK6</a>    | PAK6<br><a href="#">Entrez, Source</a>    | p21(CDKN1A)-activated kinase 6                                 | 1041         | 0.236        | -0.0673 | No         |
| 6  | <a href="#">CBLB</a>    | CBLB<br><a href="#">Entrez, Source</a>    | Cas-Br-M (murine) ecotropic retroviral transforming sequence b | 1168         | 0.215        | -0.0739 | No         |
| 7  | <a href="#">NRG3</a>    | NRG3<br><a href="#">Entrez, Source</a>    | neuregulin 3                                                   | 1208         | 0.208        | -0.0705 | No         |
| 8  | <a href="#">PIK3CD</a>  | PIK3CD<br><a href="#">Entrez, Source</a>  | phosphoinositide-3-kinase, catalytic, delta polypeptide        | 1265         | 0.200        | -0.0695 | No         |
| 9  | <a href="#">PIK3R5</a>  | PIK3R5<br><a href="#">Entrez, Source</a>  | phosphoinositide-3-kinase, regulatory subunit 5, p101          | 1401         | 0.182        | -0.0784 | No         |
| 10 | <a href="#">RPS6KB2</a> | RPS6KB2<br><a href="#">Entrez, Source</a> | ribosomal protein S6 kinase, 70kDa, polypeptide 2              | 1550         | 0.164        | -0.0894 | No         |
| 11 | <a href="#">RAF1</a>    | RAF1<br><a href="#">Entrez, Source</a>    | v-raf-1 murine leukemia viral oncogene homolog 1               | 1794         | 0.134        | -0.1127 | No         |
| 12 | <a href="#">PIK3R2</a>  | PIK3R2<br><a href="#">Entrez, Source</a>  | phosphoinositide-3-kinase, regulatory subunit 2 (p85 beta)     | 1989         | 0.114        | -0.1311 | No         |
| 13 | <a href="#">PIK3CG</a>  | PIK3CG<br><a href="#">Entrez, Source</a>  | phosphoinositide-3-kinase, catalytic, gamma polypeptide        | 2211         | 0.092        | -0.1534 | No         |
| 14 | <a href="#">ABL1</a>    | ABL1<br><a href="#">Entrez, Source</a>    | v-abl Abelson murine leukemia viral oncogene homolog 1         | 2251         | 0.088        | -0.1546 | No         |
| 15 | <a href="#">PAK3</a>    | PAK3<br><a href="#">Entrez, Source</a>    | p21 (CDKN1A)-activated kinase 3                                | 2388         | 0.075        | -0.1676 | No         |
| 16 | <a href="#">PLCG2</a>   | PLCG2<br><a href="#">Entrez, Source</a>   | phospholipase C, gamma 2 (phosphatidylinositol-specific)       | 2753         | 0.038        | -0.2087 | No         |

|    |                         |                                                               |                                                                                                    |      |        |         |    |
|----|-------------------------|---------------------------------------------------------------|----------------------------------------------------------------------------------------------------|------|--------|---------|----|
| 17 | <a href="#">CDKN1A</a>  | CDKN1A<br><a href="#">Entrez</a> ,<br><a href="#">Source</a>  | cyclin-dependent kinase inhibitor 1A (p21, Cip1)                                                   | 2964 | 0.018  | -0.2325 | No |
| 18 | <a href="#">EGFR</a>    | EGFR<br><a href="#">Entrez</a> ,<br><a href="#">Source</a>    | epidermal growth factor receptor (erythroblastic leukemia viral (v-erb-b) oncogene homolog, avian) | 3352 | -0.015 | -0.2771 | No |
| 19 | <a href="#">CAMK2G</a>  | CAMK2G<br><a href="#">Entrez</a> ,<br><a href="#">Source</a>  | calcium/calmodulin-dependent protein kinase (CaM kinase) II gamma                                  | 3386 | -0.017 | -0.2803 | No |
| 20 | <a href="#">CDKN1B</a>  | CDKN1B<br><a href="#">Entrez</a> ,<br><a href="#">Source</a>  | cyclin-dependent kinase inhibitor 1B (p27, Kip1)                                                   | 3490 | -0.026 | -0.2913 | No |
| 21 | <a href="#">BTC</a>     | BTC<br><a href="#">Entrez</a> ,<br><a href="#">Source</a>     | betacellulin                                                                                       | 3554 | -0.032 | -0.2974 | No |
| 22 | <a href="#">CAMK2D</a>  | CAMK2D<br><a href="#">Entrez</a> ,<br><a href="#">Source</a>  | calcium/calmodulin-dependent protein kinase (CaM kinase) II delta                                  | 3620 | -0.039 | -0.3036 | No |
| 23 | <a href="#">PAK7</a>    | PAK7<br><a href="#">Entrez</a> ,<br><a href="#">Source</a>    | p21(CDKN1A)-activated kinase 7                                                                     | 3875 | -0.059 | -0.3310 | No |
| 24 | <a href="#">STAT5B</a>  | STAT5B<br><a href="#">Entrez</a> ,<br><a href="#">Source</a>  | signal transducer and activator of transcription 5B                                                | 4017 | -0.072 | -0.3447 | No |
| 25 | <a href="#">NCK1</a>    | NCK1<br><a href="#">Entrez</a> ,<br><a href="#">Source</a>    | NCK adaptor protein 1                                                                              | 4109 | -0.080 | -0.3523 | No |
| 26 | <a href="#">GSK3B</a>   | GSK3B<br><a href="#">Entrez</a> ,<br><a href="#">Source</a>   | glycogen synthase kinase 3 beta                                                                    | 4405 | -0.104 | -0.3828 | No |
| 27 | <a href="#">MAPK3</a>   | MAPK3<br><a href="#">Entrez</a> ,<br><a href="#">Source</a>   | mitogen-activated protein kinase 3                                                                 | 4509 | -0.114 | -0.3905 | No |
| 28 | <a href="#">ERBB3</a>   | ERBB3<br><a href="#">Entrez</a> ,<br><a href="#">Source</a>   | v-erb-b2 erythroblastic leukemia viral oncogene homolog 3 (avian)                                  | 4711 | -0.131 | -0.4090 | No |
| 29 | <a href="#">GRB2</a>    | GRB2<br><a href="#">Entrez</a> ,<br><a href="#">Source</a>    | growth factor receptor-bound protein 2                                                             | 4744 | -0.134 | -0.4077 | No |
| 30 | <a href="#">RPS6KB1</a> | RPS6KB1<br><a href="#">Entrez</a> ,<br><a href="#">Source</a> | ribosomal protein S6 kinase, 70kDa, polypeptide 1                                                  | 4796 | -0.138 | -0.4084 | No |
| 31 | <a href="#">NRAS</a>    | NRAS<br><a href="#">Entrez</a> ,<br><a href="#">Source</a>    | neuroblastoma RAS viral (v-ras) oncogene homolog                                                   | 4809 | -0.140 | -0.4045 | No |
| 32 | <a href="#">SHC1</a>    | SHC1<br><a href="#">Entrez</a> ,<br><a href="#">Source</a>    | SHC (Src homology 2 domain containing) transforming protein 1                                      | 5080 | -0.164 | -0.4298 | No |



|    |                        |                                                                              |                                                                  |      |        |         |     |
|----|------------------------|------------------------------------------------------------------------------|------------------------------------------------------------------|------|--------|---------|-----|
| 33 | <a href="#">GAB1</a>   | <a href="#">GAB1</a><br><a href="#">Entrez</a> ,<br><a href="#">Source</a>   | GRB2-associated binding protein 1                                | 5377 | -0.192 | -0.4570 | No  |
| 34 | <a href="#">MAP2K1</a> | <a href="#">MAP2K1</a><br><a href="#">Entrez</a> ,<br><a href="#">Source</a> | mitogen-activated protein kinase kinase 1                        | 5558 | -0.211 | -0.4701 | No  |
| 35 | <a href="#">PTK2</a>   | <a href="#">PTK2</a><br><a href="#">Entrez</a> ,<br><a href="#">Source</a>   | PTK2 protein tyrosine kinase 2                                   | 5657 | -0.220 | -0.4732 | No  |
| 36 | <a href="#">CAMK2B</a> | <a href="#">CAMK2B</a><br><a href="#">Entrez</a> ,<br><a href="#">Source</a> | calcium/calmodulin-dependent protein kinase (CaM kinase) II beta | 5683 | -0.222 | -0.4677 | No  |
| 37 | <a href="#">SHC4</a>   | <a href="#">SHC4</a><br><a href="#">Entrez</a> ,<br><a href="#">Source</a>   | SHC (Src homology 2 domain containing) family, member 4          | 5953 | -0.252 | -0.4895 | No  |
| 38 | <a href="#">HBEGF</a>  | <a href="#">HBEGF</a><br><a href="#">Entrez</a> ,<br><a href="#">Source</a>  | heparin-binding EGF-like growth factor                           | 6096 | -0.268 | -0.4959 | No  |
| 39 | <a href="#">JUN</a>    | <a href="#">JUN</a><br><a href="#">Entrez</a> ,<br><a href="#">Source</a>    | jun oncogene                                                     | 6134 | -0.272 | -0.4900 | No  |
| 40 | <a href="#">MYC</a>    | <a href="#">MYC</a><br><a href="#">Entrez</a> ,<br><a href="#">Source</a>    | v-myc myelocytomatosis viral oncogene homolog (avian)            | 6413 | -0.306 | -0.5108 | Yes |
| 41 | <a href="#">MAPK10</a> | <a href="#">MAPK10</a><br><a href="#">Entrez</a> ,<br><a href="#">Source</a> | mitogen-activated protein kinase 10                              | 6420 | -0.307 | -0.4999 | Yes |
| 42 | <a href="#">PIK3CB</a> | <a href="#">PIK3CB</a><br><a href="#">Entrez</a> ,<br><a href="#">Source</a> | phosphoinositide-3-kinase, catalytic, beta polypeptide           | 6592 | -0.333 | -0.5072 | Yes |
| 43 | <a href="#">SHC3</a>   | <a href="#">SHC3</a><br><a href="#">Entrez</a> ,<br><a href="#">Source</a>   | SHC (Src homology 2 domain containing) transforming protein 3    | 6594 | -0.333 | -0.4947 | Yes |
| 44 | <a href="#">PRKCA</a>  | <a href="#">PRKCA</a><br><a href="#">Entrez</a> ,<br><a href="#">Source</a>  | protein kinase C, alpha                                          | 6631 | -0.341 | -0.4860 | Yes |
| 45 | <a href="#">PIK3CA</a> | <a href="#">PIK3CA</a><br><a href="#">Entrez</a> ,<br><a href="#">Source</a> | phosphoinositide-3-kinase, catalytic, alpha polypeptide          | 6801 | -0.370 | -0.4917 | Yes |
| 46 | <a href="#">ERBB4</a>  | <a href="#">ERBB4</a><br><a href="#">Entrez</a> ,<br><a href="#">Source</a>  | v-erb-a erythroblastic leukemia viral oncogene homolog 4 (avian) | 6803 | -0.370 | -0.4778 | Yes |
| 47 | <a href="#">NRG1</a>   | <a href="#">NRG1</a><br><a href="#">Entrez</a> ,<br><a href="#">Source</a>   | neuregulin 1                                                     | 6895 | -0.388 | -0.4737 | Yes |
| 48 | <a href="#">PAK2</a>   | <a href="#">PAK2</a><br><a href="#">Entrez</a> ,<br><a href="#">Source</a>   | p21 (CDKN1A)-activated kinase 2                                  | 6929 | -0.394 | -0.4627 | Yes |
| 49 | <a href="#">ELK1</a>   | <a href="#">ELK1</a><br><a href="#">Entrez</a> ,<br><a href="#">Source</a>   | ELK1, member of ETS oncogene family                              | 7187 | -0.449 | -0.4757 | Yes |

|    |                        |                                                              |                                                                   |      |        |         |     |
|----|------------------------|--------------------------------------------------------------|-------------------------------------------------------------------|------|--------|---------|-----|
| 50 | <a href="#">PIK3R3</a> | PIK3R3<br><a href="#">Entrez</a> ,<br><a href="#">Source</a> | phosphoinositide-3-kinase, regulatory subunit 3 (p55, gamma)      | 7209 | -0.454 | -0.4609 | Yes |
| 51 | <a href="#">MAPK1</a>  | MAPK1<br><a href="#">Entrez</a> ,<br><a href="#">Source</a>  | mitogen-activated protein kinase 1                                | 7446 | -0.522 | -0.4687 | Yes |
| 52 | <a href="#">SOS1</a>   | SOS1<br><a href="#">Entrez</a> ,<br><a href="#">Source</a>   | son of sevenless homolog 1 (Drosophila)                           | 7606 | -0.574 | -0.4655 | Yes |
| 53 | <a href="#">MAP2K7</a> | MAP2K7<br><a href="#">Entrez</a> ,<br><a href="#">Source</a> | mitogen-activated protein kinase kinase 7                         | 7677 | -0.600 | -0.4510 | Yes |
| 54 | <a href="#">MAP2K4</a> | MAP2K4<br><a href="#">Entrez</a> ,<br><a href="#">Source</a> | mitogen-activated protein kinase kinase 4                         | 7683 | -0.601 | -0.4288 | Yes |
| 55 | <a href="#">SHC2</a>   | SHC2<br><a href="#">Entrez</a> ,<br><a href="#">Source</a>   | SHC (Src homology 2 domain containing) transforming protein 2     | 7781 | -0.643 | -0.4158 | Yes |
| 56 | <a href="#">CAMK2A</a> | CAMK2A<br><a href="#">Entrez</a> ,<br><a href="#">Source</a> | calcium/calmodulin-dependent protein kinase (CaM kinase) II alpha | 7876 | -0.685 | -0.4008 | Yes |
| 57 | <a href="#">PAK1</a>   | PAK1<br><a href="#">Entrez</a> ,<br><a href="#">Source</a>   | p21/Cdc42/Rac1-activated kinase 1 (STE20 homolog, yeast)          | 7877 | -0.686 | -0.3748 | Yes |
| 58 | <a href="#">AKT1</a>   | AKT1<br><a href="#">Entrez</a> ,<br><a href="#">Source</a>   | v-akt murine thymoma viral oncogene homolog 1                     | 8115 | -0.817 | -0.3715 | Yes |
| 59 | <a href="#">AKT2</a>   | AKT2<br><a href="#">Entrez</a> ,<br><a href="#">Source</a>   | v-akt murine thymoma viral oncogene homolog 2                     | 8121 | -0.821 | -0.3410 | Yes |
| 60 | <a href="#">ARAF</a>   | ARAF<br><a href="#">Entrez</a> ,<br><a href="#">Source</a>   | v-raf murine sarcoma 3611 viral oncogene homolog                  | 8164 | -0.845 | -0.3139 | Yes |
| 61 | <a href="#">BRAF</a>   | BRAF<br><a href="#">Entrez</a> ,<br><a href="#">Source</a>   | v-raf murine sarcoma viral oncogene homolog B1                    | 8297 | -0.967 | -0.2927 | Yes |
| 62 | <a href="#">CBL</a>    | CBL<br><a href="#">Entrez</a> ,<br><a href="#">Source</a>    | Cas-Br-M (murine) ecotropic retroviral transforming sequence      | 8393 | -1.070 | -0.2633 | Yes |
| 63 | <a href="#">KRAS</a>   | KRAS<br><a href="#">Entrez</a> ,<br><a href="#">Source</a>   | v-Ki-ras2 Kirsten rat sarcoma viral oncogene homolog              | 8444 | -1.153 | -0.2254 | Yes |
| 64 | <a href="#">PIK3R1</a> | PIK3R1<br><a href="#">Entrez</a> ,<br><a href="#">Source</a> | phosphoinositide-3-kinase, regulatory subunit 1 (p85 alpha)       | 8463 | -1.179 | -0.1829 | Yes |
| 65 | <a href="#">CRK</a>    | CRK<br><a href="#">Entrez</a> ,<br><a href="#">Source</a>    | v-crk sarcoma virus CT10 oncogene homolog (avian)                 | 8490 | -1.223 | -0.1396 | Yes |
| 66 | <a href="#">MAPK9</a>  | MAPK9<br><a href="#">Entrez</a> ,<br><a href="#">Source</a>  | mitogen-activated protein kinase 9                                | 8528 | -1.320 | -0.0940 | Yes |

|    |                      |                                        |                                                                         |      |        |         |     |
|----|----------------------|----------------------------------------|-------------------------------------------------------------------------|------|--------|---------|-----|
| 67 | <a href="#">CRKL</a> | CRKL<br><a href="#">Entrez, Source</a> | v-crk sarcoma virus CT10 oncogene homolog (avian)-like                  | 8535 | -1.339 | -0.0440 | Yes |
| 68 | <a href="#">AKT3</a> | AKT3<br><a href="#">Entrez, Source</a> | v-akt murine thymoma viral oncogene homolog 3 (protein kinase B, gamma) | 8586 | -1.473 | 0.0060  | Yes |

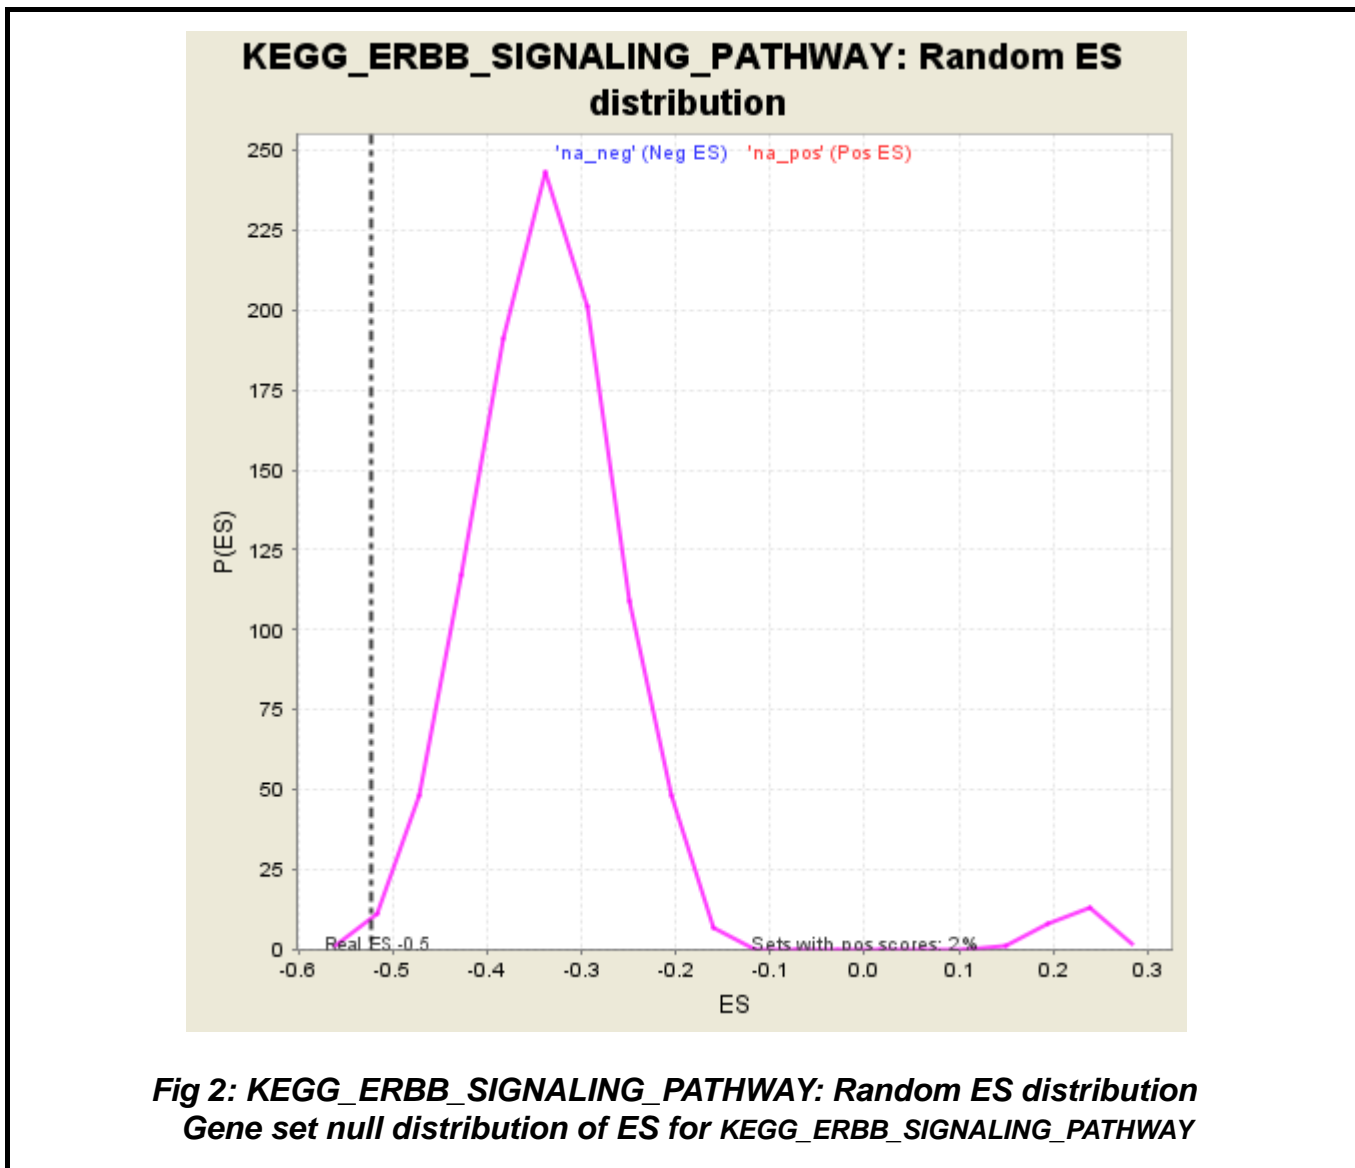

**Fig 2: KEGG\_ERBB\_SIGNALING\_PATHWAY: Random ES distribution**  
**Gene set null distribution of ES for KEGG\_ERBB\_SIGNALING\_PATHWAY**

**Table: GSEA Results Summary**

|                                   |                              |
|-----------------------------------|------------------------------|
| Dataset                           | GSEA_18M_collapsed           |
| Phenotype                         | NoPhenotypeAvailable         |
| Upregulated in class              | na_neg                       |
| GeneSet                           | KEGG_SPHINGOLIPID_METABOLISM |
| Enrichment Score (ES)             | -0.59689146                  |
| Normalized Enrichment Score (NES) | -1.5293154                   |
| Nominal p-value                   | 0.022727273                  |
| FDR q-value                       | 0.12168655                   |
| FWER p-Value                      | 0.766                        |

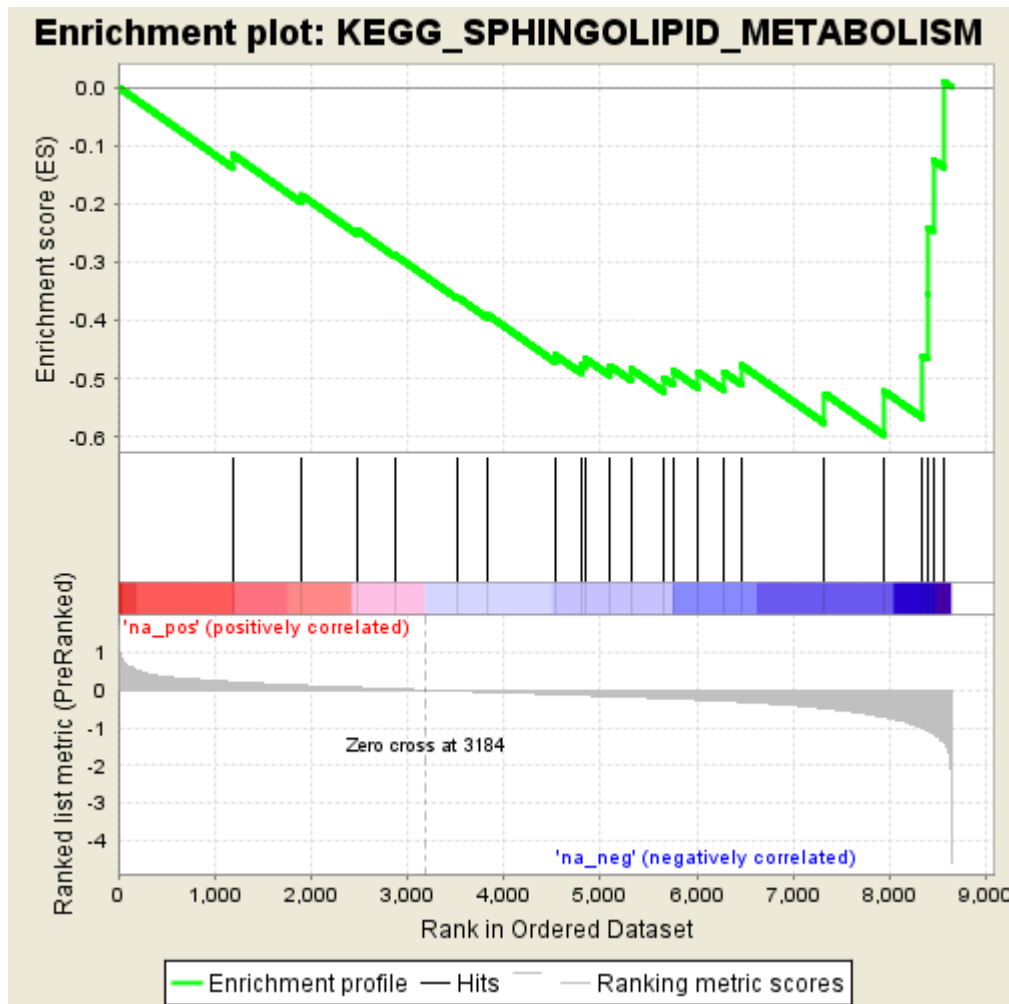

**Fig 1: Enrichment plot: KEGG\_SPHINGOLIPID\_METABOLISM**  
**Profile of the Running ES Score & Positions of GeneSet Members on the Rank Ordered List**

**Table: GSEA details [\[plain text format\]](#)**

| PROBE | GENE | GENE_TITLE | RANK | RANK | RUNNING | CORE |
|-------|------|------------|------|------|---------|------|
|-------|------|------------|------|------|---------|------|

|    |                         | SYMBOL                                                        |                                                                                            | IN GENE LIST | METRIC SCORE | ES      | ENRICHMENT |
|----|-------------------------|---------------------------------------------------------------|--------------------------------------------------------------------------------------------|--------------|--------------|---------|------------|
| 1  | <a href="#">GBA</a>     | GBA<br><a href="#">Entrez</a> ,<br><a href="#">Source</a>     | glucosidase, beta; acid<br>(includes glucosylceramidase)                                   | 1185         | 0.212        | -0.1151 | No         |
| 2  | <a href="#">PPAP2B</a>  | PPAP2B<br><a href="#">Entrez</a> ,<br><a href="#">Source</a>  | phosphatidic acid phosphatase<br>type 2B                                                   | 1901         | 0.123        | -0.1852 | No         |
| 3  | <a href="#">ARSA</a>    | ARSA<br><a href="#">Entrez</a> ,<br><a href="#">Source</a>    | arylsulfatase A                                                                            | 2482         | 0.065        | -0.2456 | No         |
| 4  | <a href="#">SPTLC2</a>  | SPTLC2<br><a href="#">Entrez</a> ,<br><a href="#">Source</a>  | serine palmitoyltransferase,<br>long chain base subunit 2                                  | 2868         | 0.027        | -0.2874 | No         |
| 5  | <a href="#">NEU2</a>    | NEU2<br><a href="#">Entrez</a> ,<br><a href="#">Source</a>    | sialidase 2 (cytosolic sialidase)                                                          | 3521         | -0.028       | -0.3601 | No         |
| 6  | <a href="#">GAL3ST1</a> | GAL3ST1<br><a href="#">Entrez</a> ,<br><a href="#">Source</a> | galactose-3-O-sulfotransferase<br>1                                                        | 3837         | -0.056       | -0.3908 | No         |
| 7  | <a href="#">SMPD2</a>   | SMPD2<br><a href="#">Entrez</a> ,<br><a href="#">Source</a>   | sphingomyelin<br>phosphodiesterase 2, neutral<br>membrane (neutral<br>sphingomyelinase)    | 4529         | -0.115       | -0.4588 | No         |
| 8  | <a href="#">NEU1</a>    | NEU1<br><a href="#">Entrez</a> ,<br><a href="#">Source</a>    | sialidase 1 (lysosomal<br>sialidase)                                                       | 4805         | -0.139       | -0.4760 | No         |
| 9  | <a href="#">SMPD3</a>   | SMPD3<br><a href="#">Entrez</a> ,<br><a href="#">Source</a>   | sphingomyelin<br>phosphodiesterase 3, neutral<br>membrane (neutral<br>sphingomyelinase II) | 4843         | -0.144       | -0.4651 | No         |
| 10 | <a href="#">GLB1</a>    | GLB1<br><a href="#">Entrez</a> ,<br><a href="#">Source</a>    | galactosidase, beta 1                                                                      | 5096         | -0.165       | -0.4769 | No         |
| 11 | <a href="#">ASAH2</a>   | ASAH2<br><a href="#">Entrez</a> ,<br><a href="#">Source</a>   | N-acylsphingosine<br>amidohydrolase<br>(non-lysosomal ceramidase) 2                        | 5318         | -0.186       | -0.4829 | No         |
| 12 | <a href="#">PPAP2C</a>  | PPAP2C<br><a href="#">Entrez</a> ,<br><a href="#">Source</a>  | phosphatidic acid phosphatase<br>type 2C                                                   | 5658         | -0.220       | -0.4990 | No         |
| 13 | <a href="#">PPAP2A</a>  | PPAP2A<br><a href="#">Entrez</a> ,<br><a href="#">Source</a>  | phosphatidic acid phosphatase<br>type 2A                                                   | 5754         | -0.230       | -0.4858 | No         |
| 14 | <a href="#">SGPP2</a>   | SGPP2<br><a href="#">Entrez</a> ,<br><a href="#">Source</a>   | sphingosine-1-phosphate<br>phosphatase 2                                                   | 6014         | -0.259       | -0.4885 | No         |
| 15 | <a href="#">SPHK1</a>   | SPHK1<br><a href="#">Entrez</a> ,<br><a href="#">Source</a>   | sphingosine kinase 1                                                                       | 6284         | -0.290       | -0.4891 | No         |

|    |                         |                                                                               |                                                                                  |      |        |         |     |
|----|-------------------------|-------------------------------------------------------------------------------|----------------------------------------------------------------------------------|------|--------|---------|-----|
| 16 | <a href="#">CERK</a>    | <a href="#">CERK</a><br><a href="#">Entrez</a> ,<br><a href="#">Source</a>    | ceramide kinase                                                                  | 6462 | -0.315 | -0.4764 | No  |
| 17 | <a href="#">SMPD4</a>   | <a href="#">SMPD4</a><br><a href="#">Entrez</a> ,<br><a href="#">Source</a>   | sphingomyelin phosphodiesterase 4, neutral membrane (neutral sphingomyelinase-3) | 7325 | -0.487 | -0.5250 | Yes |
| 18 | <a href="#">GLA</a>     | <a href="#">GLA</a><br><a href="#">Entrez</a> ,<br><a href="#">Source</a>     | galactosidase, alpha                                                             | 7945 | -0.717 | -0.5212 | Yes |
| 19 | <a href="#">SGPL1</a>   | <a href="#">SGPL1</a><br><a href="#">Entrez</a> ,<br><a href="#">Source</a>   | sphingosine-1-phosphate lyase 1                                                  | 8339 | -1.009 | -0.4604 | Yes |
| 20 | <a href="#">GALC</a>    | <a href="#">GALC</a><br><a href="#">Entrez</a> ,<br><a href="#">Source</a>    | galactosylceramidase                                                             | 8389 | -1.067 | -0.3534 | Yes |
| 21 | <a href="#">B4GALT6</a> | <a href="#">B4GALT6</a><br><a href="#">Entrez</a> ,<br><a href="#">Source</a> | UDP-Gal:betaGlcNAc beta 1,4-galactosyltransferase, polypeptide 6                 | 8397 | -1.072 | -0.2410 | Yes |
| 22 | <a href="#">UGCG</a>    | <a href="#">UGCG</a><br><a href="#">Entrez</a> ,<br><a href="#">Source</a>    | UDP-glucose ceramide glucosyltransferase                                         | 8449 | -1.156 | -0.1250 | Yes |
| 23 | <a href="#">SGPP1</a>   | <a href="#">SGPP1</a><br><a href="#">Entrez</a> ,<br><a href="#">Source</a>   | sphingosine-1-phosphate phosphatase 1                                            | 8562 | -1.389 | 0.0087  | Yes |

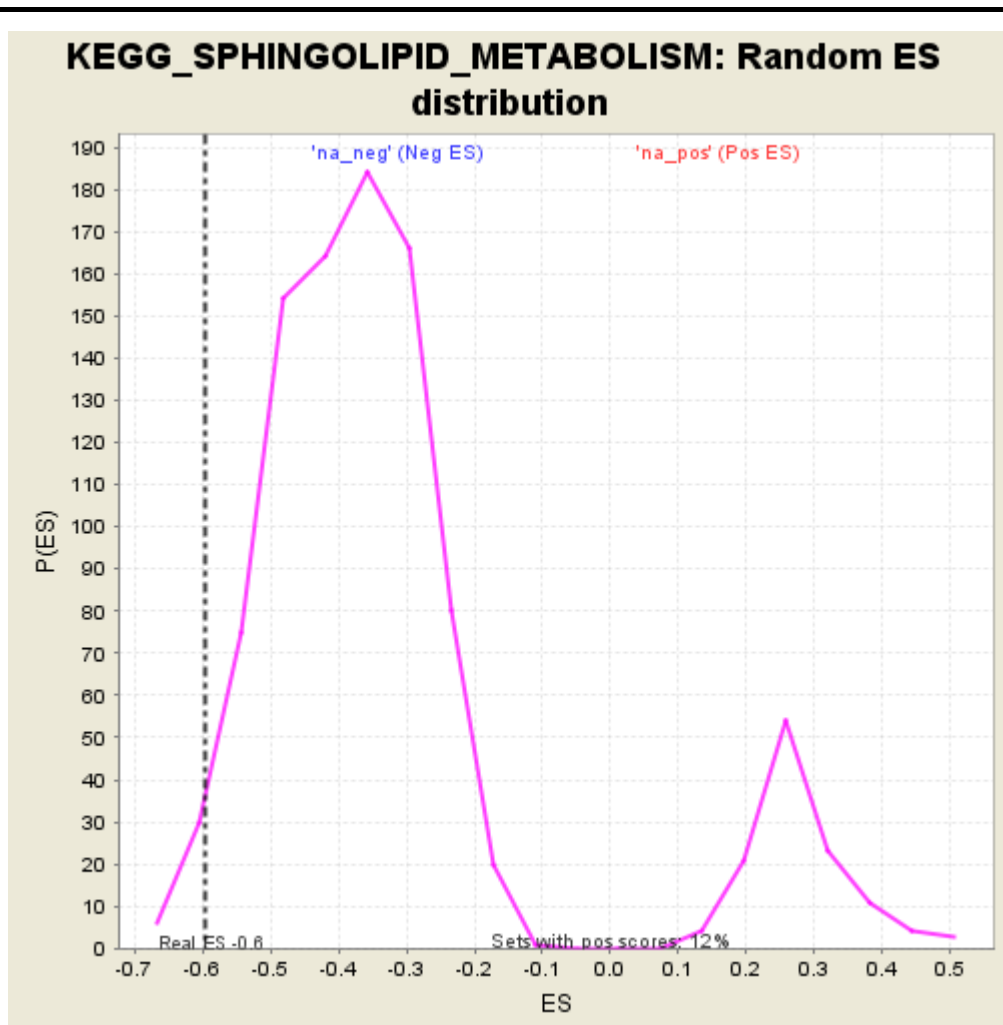

**Fig 2: KEGG\_SPHINGOLIPID\_METABOLISM: Random ES distribution**  
**Gene set null distribution of ES for KEGG\_SPHINGOLIPID\_METABOLISM**

**Table: GSEA Results Summary**

|                                   |                           |
|-----------------------------------|---------------------------|
| Dataset                           | GSEA_18M_collapsed        |
| Phenotype                         | NoPhenotypeAvailable      |
| Upregulated in class              | na_neg                    |
| GeneSet                           | KEGG_LONG_TERM_DEPRESSION |
| Enrichment Score (ES)             | -0.53285664               |
| Normalized Enrichment Score (NES) | -1.5241755                |
| Nominal p-value                   | 0.008368201               |
| FDR q-value                       | 0.11846876                |
| FWER p-Value                      | 0.785                     |

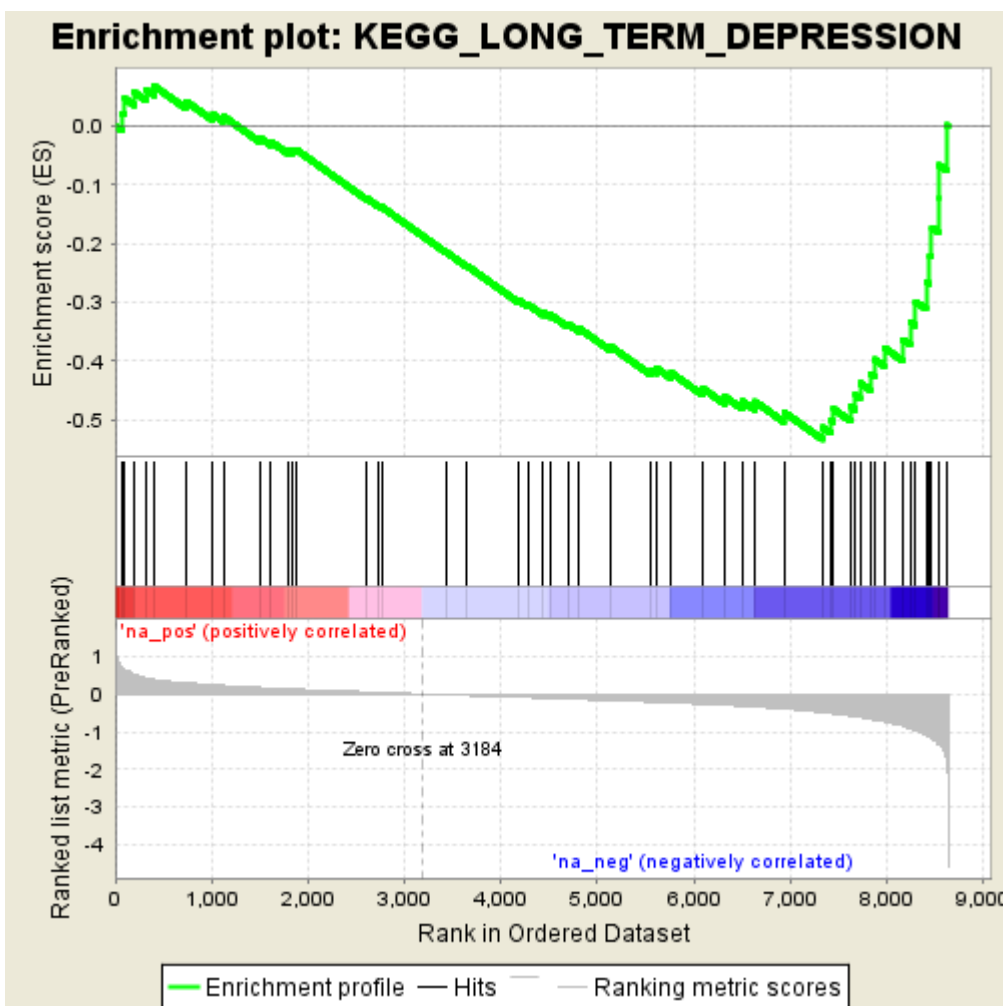

**Fig 1: Enrichment plot: KEGG LONG TERM DEPRESSION**  
**Profile of the Running ES Score & Positions of GeneSet Members on the Rank Ordered List**

**Table: GSEA details [\[plain text format\]](#)**

| PROBE | GENE | GENE_TITLE | RANK | RANK | RUNNING | CORE |
|-------|------|------------|------|------|---------|------|
|-------|------|------------|------|------|---------|------|



|    |                         | SYMBOL                                                        |                                                                                 | IN GENE LIST | METRIC SCORE | ES      | ENRICHMENT |
|----|-------------------------|---------------------------------------------------------------|---------------------------------------------------------------------------------|--------------|--------------|---------|------------|
| 1  | <a href="#">NOS1</a>    | NOS1<br><a href="#">Entrez</a> ,<br><a href="#">Source</a>    | nitric oxide synthase 1 (neuronal)                                              | 73           | 0.704        | 0.0214  | No         |
| 2  | <a href="#">PLA2G4B</a> | PLA2G4B<br><a href="#">Entrez</a> ,<br><a href="#">Source</a> | phospholipase A2, group IVB (cytosolic)                                         | 97           | 0.651        | 0.0464  | No         |
| 3  | <a href="#">RYR1</a>    | RYR1<br><a href="#">Entrez</a> ,<br><a href="#">Source</a>    | ryanodine receptor 1 (skeletal)                                                 | 198          | 0.523        | 0.0569  | No         |
| 4  | <a href="#">PLA2G2F</a> | PLA2G2F<br><a href="#">Entrez</a> ,<br><a href="#">Source</a> | phospholipase A2, group IIF                                                     | 322          | 0.428        | 0.0608  | No         |
| 5  | <a href="#">GNAS</a>    | GNAS<br><a href="#">Entrez</a> ,<br><a href="#">Source</a>    | GNAS complex locus                                                              | 403          | 0.384        | 0.0678  | No         |
| 6  | <a href="#">PLCB3</a>   | PLCB3<br><a href="#">Entrez</a> ,<br><a href="#">Source</a>   | phospholipase C, beta 3 (phosphatidylinositol-specific)                         | 733          | 0.292        | 0.0419  | No         |
| 7  | <a href="#">PLA2G4A</a> | PLA2G4A<br><a href="#">Entrez</a> ,<br><a href="#">Source</a> | phospholipase A2, group IVA (cytosolic, calcium-dependent)                      | 1013         | 0.240        | 0.0196  | No         |
| 8  | <a href="#">IGF1R</a>   | IGF1R<br><a href="#">Entrez</a> ,<br><a href="#">Source</a>   | insulin-like growth factor 1 receptor                                           | 1122         | 0.222        | 0.0164  | No         |
| 9  | <a href="#">PLA2G4E</a> | PLA2G4E<br><a href="#">Entrez</a> ,<br><a href="#">Source</a> | phospholipase A2, group IVE                                                     | 1495         | 0.171        | -0.0196 | No         |
| 10 | <a href="#">ITPR2</a>   | ITPR2<br><a href="#">Entrez</a> ,<br><a href="#">Source</a>   | inositol 1,4,5-triphosphate receptor, type 2                                    | 1615         | 0.156        | -0.0269 | No         |
| 11 | <a href="#">RAF1</a>    | RAF1<br><a href="#">Entrez</a> ,<br><a href="#">Source</a>    | v-raf-1 murine leukemia viral oncogene homolog 1                                | 1794         | 0.134        | -0.0419 | No         |
| 12 | <a href="#">PPP2R1B</a> | PPP2R1B<br><a href="#">Entrez</a> ,<br><a href="#">Source</a> | protein phosphatase 2 (formerly 2A), regulatory subunit A (PR 65), beta isoform | 1840         | 0.130        | -0.0416 | No         |
| 13 | <a href="#">PRKG1</a>   | PRKG1<br><a href="#">Entrez</a> ,<br><a href="#">Source</a>   | protein kinase, cGMP-dependent, type I                                          | 1869         | 0.127        | -0.0395 | No         |
| 14 | <a href="#">GRM1</a>    | GRM1<br><a href="#">Entrez</a> ,<br><a href="#">Source</a>    | glutamate receptor, metabotropic 1                                              | 2606         | 0.052        | -0.1230 | No         |
| 15 | <a href="#">GRIA2</a>   | GRIA2<br><a href="#">Entrez</a> ,<br><a href="#">Source</a>   | glutamate receptor, ionotropic, AMPA 2                                          | 2733         | 0.040        | -0.1360 | No         |

|    |                          |                                                                |                                                                                         |      |        |         |    |
|----|--------------------------|----------------------------------------------------------------|-----------------------------------------------------------------------------------------|------|--------|---------|----|
| 16 | <a href="#">CACNA1A</a>  | CACNA1A<br><a href="#">Entrez</a> ,<br><a href="#">Source</a>  | calcium channel, voltage-dependent, P/Q type, alpha 1A subunit                          | 2760 | 0.037  | -0.1374 | No |
| 17 | <a href="#">GRIA3</a>    | GRIA3<br><a href="#">Entrez</a> ,<br><a href="#">Source</a>    | glutamate receptor, ionotropic, AMPA 3                                                  | 3429 | -0.021 | -0.2143 | No |
| 18 | <a href="#">PLCB1</a>    | PLCB1<br><a href="#">Entrez</a> ,<br><a href="#">Source</a>    | phospholipase C, beta 1 (phosphoinositide-specific)                                     | 3646 | -0.041 | -0.2377 | No |
| 19 | <a href="#">ITPR3</a>    | ITPR3<br><a href="#">Entrez</a> ,<br><a href="#">Source</a>    | inositol 1,4,5-triphosphate receptor, type 3                                            | 4184 | -0.087 | -0.2966 | No |
| 20 | <a href="#">GNAO1</a>    | GNAO1<br><a href="#">Entrez</a> ,<br><a href="#">Source</a>    | guanine nucleotide binding protein (G protein), alpha activating activity polypeptide O | 4285 | -0.095 | -0.3042 | No |
| 21 | <a href="#">LYN</a>      | LYN<br><a href="#">Entrez</a> ,<br><a href="#">Source</a>      | v-yes-1 Yamaguchi sarcoma viral related oncogene homolog                                | 4439 | -0.108 | -0.3175 | No |
| 22 | <a href="#">MAPK3</a>    | MAPK3<br><a href="#">Entrez</a> ,<br><a href="#">Source</a>    | mitogen-activated protein kinase 3                                                      | 4509 | -0.114 | -0.3207 | No |
| 23 | <a href="#">CRH</a>      | CRH<br><a href="#">Entrez</a> ,<br><a href="#">Source</a>      | corticotropin releasing hormone                                                         | 4694 | -0.129 | -0.3366 | No |
| 24 | <a href="#">NRAS</a>     | NRAS<br><a href="#">Entrez</a> ,<br><a href="#">Source</a>     | neuroblastoma RAS viral (v-ras) oncogene homolog                                        | 4809 | -0.140 | -0.3439 | No |
| 25 | <a href="#">PPP2CB</a>   | PPP2CB<br><a href="#">Entrez</a> ,<br><a href="#">Source</a>   | protein phosphatase 2 (formerly 2A), catalytic subunit, beta isoform                    | 5137 | -0.170 | -0.3748 | No |
| 26 | <a href="#">MAP2K1</a>   | MAP2K1<br><a href="#">Entrez</a> ,<br><a href="#">Source</a>   | mitogen-activated protein kinase kinase 1                                               | 5558 | -0.211 | -0.4148 | No |
| 27 | <a href="#">GRIA1</a>    | GRIA1<br><a href="#">Entrez</a> ,<br><a href="#">Source</a>    | glutamate receptor, ionotropic, AMPA 1                                                  | 5612 | -0.215 | -0.4118 | No |
| 28 | <a href="#">GNAI2</a>    | GNAI2<br><a href="#">Entrez</a> ,<br><a href="#">Source</a>    | guanine nucleotide binding protein (G protein), alpha inhibiting activity polypeptide 2 | 5765 | -0.232 | -0.4197 | No |
| 29 | <a href="#">GNAZ</a>     | GNAZ<br><a href="#">Entrez</a> ,<br><a href="#">Source</a>     | guanine nucleotide binding protein (G protein), alpha z polypeptide                     | 6093 | -0.268 | -0.4464 | No |
| 30 | <a href="#">GNAI3</a>    | GNAI3<br><a href="#">Entrez</a> ,<br><a href="#">Source</a>    | guanine nucleotide binding protein (G protein), alpha inhibiting activity polypeptide 3 | 6319 | -0.295 | -0.4600 | No |
| 31 | <a href="#">PLA2G12A</a> | PLA2G12A<br><a href="#">Entrez</a> ,<br><a href="#">Source</a> | phospholipase A2, group X1IA                                                            | 6502 | -0.320 | -0.4677 | No |

|    |                         |                                                               |                                                                                                  |      |        |         |     |
|----|-------------------------|---------------------------------------------------------------|--------------------------------------------------------------------------------------------------|------|--------|---------|-----|
| 32 | <a href="#">PRKCA</a>   | PRKCA<br><a href="#">Entrez</a> ,<br><a href="#">Source</a>   | protein kinase C, alpha                                                                          | 6631 | -0.341 | -0.4681 | No  |
| 33 | <a href="#">PRKG2</a>   | PRKG2<br><a href="#">Entrez</a> ,<br><a href="#">Source</a>   | protein kinase,<br>cGMP-dependent, type II                                                       | 6933 | -0.394 | -0.4864 | No  |
| 34 | <a href="#">GNAI1</a>   | GNAI1<br><a href="#">Entrez</a> ,<br><a href="#">Source</a>   | guanine nucleotide binding<br>protein (G protein), alpha<br>inhibiting activity polypeptide<br>1 | 7333 | -0.488 | -0.5121 | Yes |
| 35 | <a href="#">GRM5</a>    | GRM5<br><a href="#">Entrez</a> ,<br><a href="#">Source</a>    | glutamate receptor,<br>metabotropic 5                                                            | 7423 | -0.514 | -0.5007 | Yes |
| 36 | <a href="#">MAPK1</a>   | MAPK1<br><a href="#">Entrez</a> ,<br><a href="#">Source</a>   | mitogen-activated protein<br>kinase 1                                                            | 7446 | -0.522 | -0.4811 | Yes |
| 37 | <a href="#">IGF1</a>    | IGF1<br><a href="#">Entrez</a> ,<br><a href="#">Source</a>    | insulin-like growth factor 1<br>(somatomedin C)                                                  | 7626 | -0.580 | -0.4773 | Yes |
| 38 | <a href="#">PLA2G3</a>  | PLA2G3<br><a href="#">Entrez</a> ,<br><a href="#">Source</a>  | phospholipase A2, group III                                                                      | 7674 | -0.598 | -0.4573 | Yes |
| 39 | <a href="#">PLA2G6</a>  | PLA2G6<br><a href="#">Entrez</a> ,<br><a href="#">Source</a>  | phospholipase A2, group VI<br>(cytosolic, calcium-<br>independent)                               | 7724 | -0.616 | -0.4369 | Yes |
| 40 | <a href="#">ITPR1</a>   | ITPR1<br><a href="#">Entrez</a> ,<br><a href="#">Source</a>   | inositol 1,4,5-triphosphate<br>receptor, type 1                                                  | 7830 | -0.669 | -0.4207 | Yes |
| 41 | <a href="#">PLCB4</a>   | PLCB4<br><a href="#">Entrez</a> ,<br><a href="#">Source</a>   | phospholipase C, beta 4                                                                          | 7874 | -0.685 | -0.3966 | Yes |
| 42 | <a href="#">CRHR1</a>   | CRHR1<br><a href="#">Entrez</a> ,<br><a href="#">Source</a>   | corticotropin releasing<br>hormone receptor 1                                                    | 7974 | -0.729 | -0.3772 | Yes |
| 43 | <a href="#">ARAF</a>    | ARAF<br><a href="#">Entrez</a> ,<br><a href="#">Source</a>    | v-raf murine sarcoma 3611<br>viral oncogene homolog                                              | 8164 | -0.845 | -0.3633 | Yes |
| 44 | <a href="#">GUCY1B3</a> | GUCY1B3<br><a href="#">Entrez</a> ,<br><a href="#">Source</a> | guanylate cyclase 1, soluble,<br>beta 3                                                          | 8244 | -0.915 | -0.3336 | Yes |
| 45 | <a href="#">BRAF</a>    | BRAF<br><a href="#">Entrez</a> ,<br><a href="#">Source</a>    | v-raf murine sarcoma viral<br>oncogene homolog B1                                                | 8297 | -0.967 | -0.2986 | Yes |
| 46 | <a href="#">GNA12</a>   | GNA12<br><a href="#">Entrez</a> ,<br><a href="#">Source</a>   | guanine nucleotide binding<br>protein (G protein) alpha 12                                       | 8409 | -1.090 | -0.2652 | Yes |
| 47 | <a href="#">KRAS</a>    | KRAS<br><a href="#">Entrez</a> ,<br><a href="#">Source</a>    | v-Ki-ras2 Kirsten rat sarcoma<br>viral oncogene homolog                                          | 8444 | -1.153 | -0.2202 | Yes |

|    |                         |                                                               |                                                               |      |        |         |     |
|----|-------------------------|---------------------------------------------------------------|---------------------------------------------------------------|------|--------|---------|-----|
| 48 | <a href="#">GUCY1A3</a> | GUCY1A3<br><a href="#">Entrez</a> ,<br><a href="#">Source</a> | guanylate cyclase 1, soluble, alpha 3                         | 8465 | -1.181 | -0.1724 | Yes |
| 49 | <a href="#">GNA13</a>   | GNA13<br><a href="#">Entrez</a> ,<br><a href="#">Source</a>   | guanine nucleotide binding protein (G protein), alpha 13      | 8538 | -1.347 | -0.1235 | Yes |
| 50 | <a href="#">GNAQ</a>    | GNAQ<br><a href="#">Entrez</a> ,<br><a href="#">Source</a>    | guanine nucleotide binding protein (G protein), q polypeptide | 8542 | -1.352 | -0.0665 | Yes |
| 51 | <a href="#">GRID2</a>   | GRID2<br><a href="#">Entrez</a> ,<br><a href="#">Source</a>   | glutamate receptor, ionotropic, delta 2                       | 8624 | -1.822 | 0.0015  | Yes |

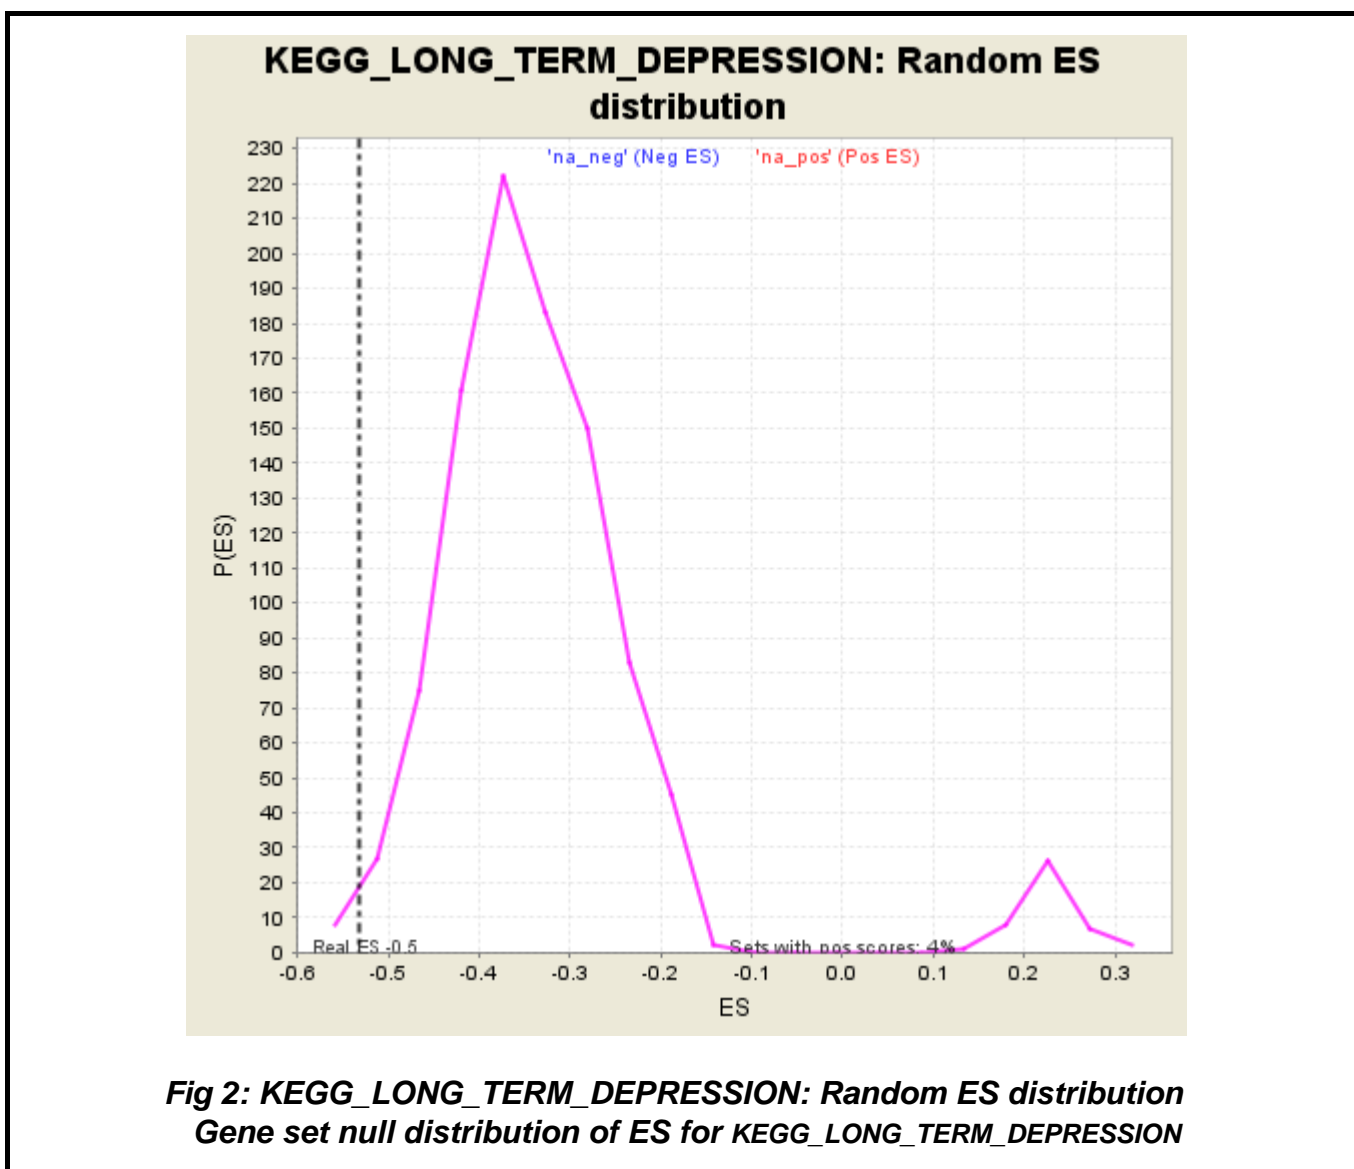

**Fig 2: KEGG\_LONG\_TERM\_DEPRESSION: Random ES distribution**  
**Gene set null distribution of ES for KEGG\_LONG\_TERM\_DEPRESSION**

**Table: GSEA Results Summary**

|                                   |                                  |
|-----------------------------------|----------------------------------|
| Dataset                           | GSEA_18M_collapsed               |
| Phenotype                         | NoPhenotypeAvailable             |
| Upregulated in class              | na_neg                           |
| GeneSet                           | REACTOME_RECYCLING_PATHWAY_OF_L1 |
| Enrichment Score (ES)             | -0.7328634                       |
| Normalized Enrichment Score (NES) | -1.8283837                       |
| Nominal p-value                   | 0.0011235955                     |
| FDR q-value                       | 0.030726112                      |
| FWER p-Value                      | 0.029                            |

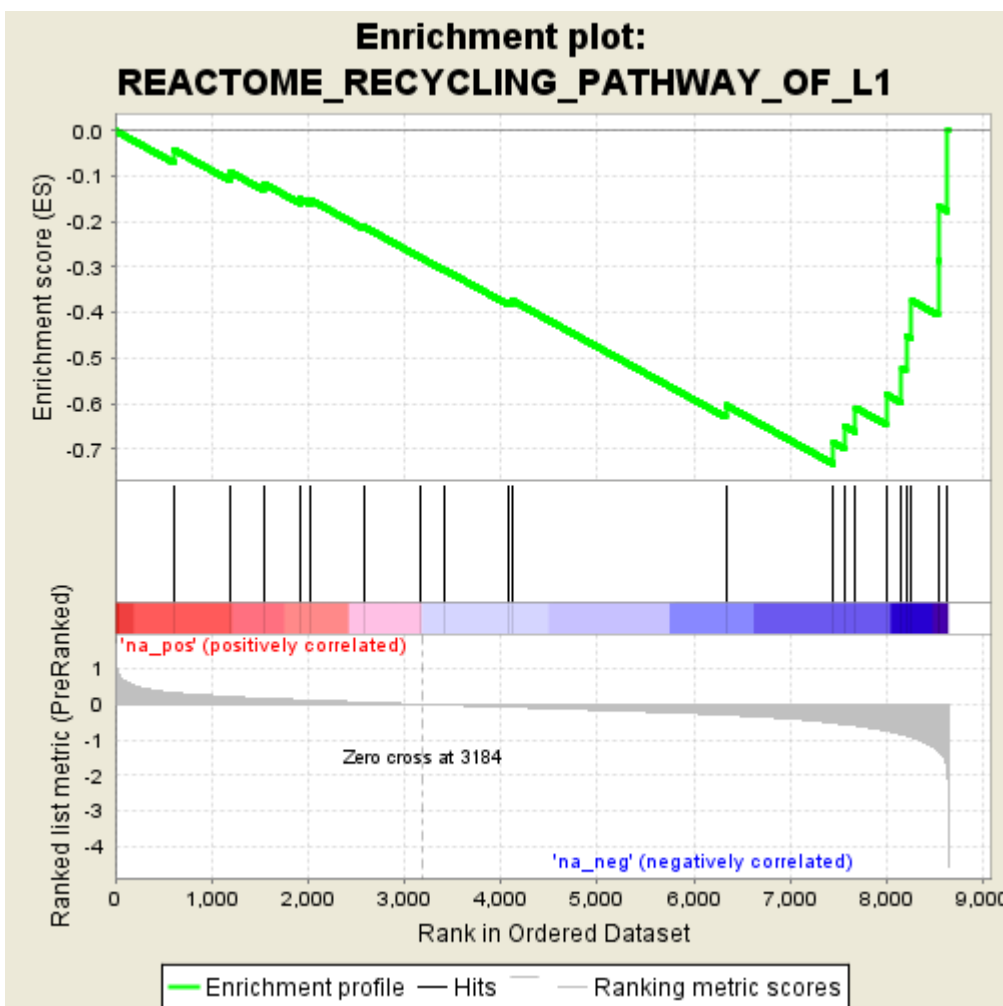

**Fig 1: Enrichment plot: REACTOME\_RECYCLING\_PATHWAY\_OF\_L1**  
**Profile of the Running ES Score & Positions of GeneSet Members on the Rank Ordered List**

**Table: GSEA details [\[plain text format\]](#)**

| PROBE | GENE | GENE_TITLE | RANK | RANK | RUNNING | CORE |
|-------|------|------------|------|------|---------|------|
|-------|------|------------|------|------|---------|------|

|    |                         | SYMBOL                                    |                                                    | IN GENE LIST | METRIC SCORE | ES      | ENRICHMENT |
|----|-------------------------|-------------------------------------------|----------------------------------------------------|--------------|--------------|---------|------------|
| 1  | <a href="#">DPYSL2</a>  | DPYSL2<br><a href="#">Entrez, Source</a>  | dihydropyrimidinase-like 2                         | 610          | 0.319        | -0.0423 | No         |
| 2  | <a href="#">CLTC</a>    | CLTC<br><a href="#">Entrez, Source</a>    | clathrin, heavy chain (Hc)                         | 1194         | 0.211        | -0.0911 | No         |
| 3  | <a href="#">RPS6KA1</a> | RPS6KA1<br><a href="#">Entrez, Source</a> | ribosomal protein S6 kinase, 90kDa, polypeptide 1  | 1540         | 0.165        | -0.1164 | No         |
| 4  | <a href="#">AP2A1</a>   | AP2A1<br><a href="#">Entrez, Source</a>   | adaptor-related protein complex 2, alpha 1 subunit | 1919         | 0.121        | -0.1495 | No         |
| 5  | <a href="#">CLTA</a>    | CLTA<br><a href="#">Entrez, Source</a>    | clathrin, light chain (Lca)                        | 2024         | 0.110        | -0.1518 | No         |
| 6  | <a href="#">RPS6KA4</a> | RPS6KA4<br><a href="#">Entrez, Source</a> | ribosomal protein S6 kinase, 90kDa, polypeptide 4  | 2576         | 0.055        | -0.2108 | No         |
| 7  | <a href="#">RPS6KA2</a> | RPS6KA2<br><a href="#">Entrez, Source</a> | ribosomal protein S6 kinase, 90kDa, polypeptide 2  | 3164         | 0.002        | -0.2788 | No         |
| 8  | <a href="#">NUMB</a>    | NUMB<br><a href="#">Entrez, Source</a>    | numb homolog (Drosophila)                          | 3403         | -0.019       | -0.3047 | No         |
| 9  | <a href="#">RDX</a>     | RDX<br><a href="#">Entrez, Source</a>     | radixin                                            | 4080         | -0.077       | -0.3762 | No         |
| 10 | <a href="#">AP2M1</a>   | AP2M1<br><a href="#">Entrez, Source</a>   | adaptor-related protein complex 2, mu 1 subunit    | 4116         | -0.081       | -0.3731 | No         |
| 11 | <a href="#">DNM2</a>    | DNM2<br><a href="#">Entrez, Source</a>    | dynamamin 2                                        | 6331         | -0.296       | -0.6036 | No         |
| 12 | <a href="#">MAPK1</a>   | MAPK1<br><a href="#">Entrez, Source</a>   | mitogen-activated protein kinase 1                 | 7446         | -0.522       | -0.6863 | Yes        |
| 13 | <a href="#">RPS6KA3</a> | RPS6KA3<br><a href="#">Entrez, Source</a> | ribosomal protein S6 kinase, 90kDa, polypeptide 3  | 7559         | -0.558       | -0.6495 | Yes        |
| 14 | <a href="#">RPS6KA6</a> | RPS6KA6<br><a href="#">Entrez, Source</a> | ribosomal protein S6 kinase, 90kDa, polypeptide 6  | 7676         | -0.599       | -0.6094 | Yes        |
| 15 | <a href="#">DNM1</a>    | DNM1<br><a href="#">Entrez, Source</a>    | dynamamin 1                                        | 7993         | -0.744       | -0.5797 | Yes        |
| 16 | <a href="#">MSN</a>     | MSN<br><a href="#">Entrez, Source</a>     | moesin                                             | 8155         | -0.837       | -0.5237 | Yes        |

|    |                         |                                                               |                                                    |      |        |         |     |
|----|-------------------------|---------------------------------------------------------------|----------------------------------------------------|------|--------|---------|-----|
| 17 | <a href="#">L1CAM</a>   | L1CAM<br><a href="#">Entrez</a> ,<br><a href="#">Source</a>   | L1 cell adhesion molecule                          | 8199 | -0.881 | -0.4501 | Yes |
| 18 | <a href="#">AP2A2</a>   | AP2A2<br><a href="#">Entrez</a> ,<br><a href="#">Source</a>   | adaptor-related protein complex 2, alpha 2 subunit | 8259 | -0.929 | -0.3740 | Yes |
| 19 | <a href="#">SH3GL2</a>  | SH3GL2<br><a href="#">Entrez</a> ,<br><a href="#">Source</a>  | SH3-domain GRB2-like 2                             | 8533 | -1.335 | -0.2865 | Yes |
| 20 | <a href="#">AP2B1</a>   | AP2B1<br><a href="#">Entrez</a> ,<br><a href="#">Source</a>   | adaptor-related protein complex 2, beta 1 subunit  | 8540 | -1.348 | -0.1670 | Yes |
| 21 | <a href="#">RPS6KA5</a> | RPS6KA5<br><a href="#">Entrez</a> ,<br><a href="#">Source</a> | ribosomal protein S6 kinase, 90kDa, polypeptide 5  | 8631 | -1.996 | 0.0007  | Yes |

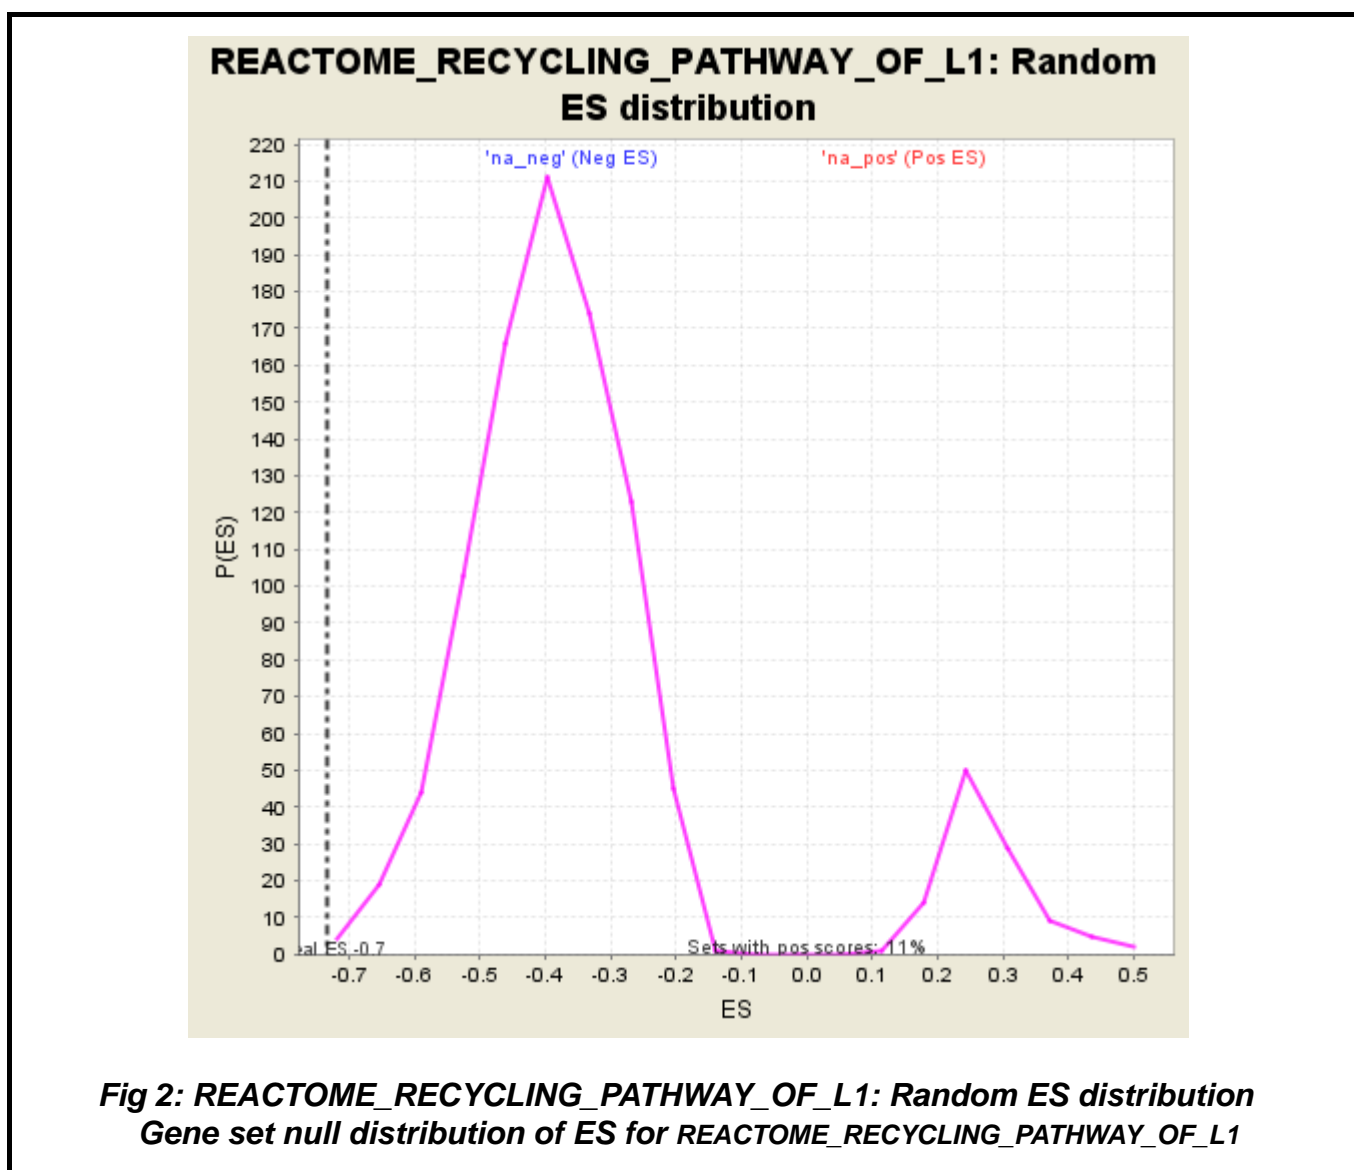

**Fig 2: REACTOME\_RECYCLING\_PATHWAY\_OF\_L1: Random ES distribution**  
Gene set null distribution of ES for REACTOME\_RECYCLING\_PATHWAY\_OF\_L1

**Table: GSEA Results Summary**

|                                   |                                    |
|-----------------------------------|------------------------------------|
| Dataset                           | GSEA_18M_collapsed                 |
| Phenotype                         | NoPhenotypeAvailable               |
| Upregulated in class              | na_neg                             |
| GeneSet                           | REACTOME_SIGNAL_TRANSDUCTION_BY_L1 |
| Enrichment Score (ES)             | -0.6515924                         |
| Normalized Enrichment Score (NES) | -1.7733538                         |
| Nominal p-value                   | 0.0                                |
| FDR q-value                       | 0.049035944                        |
| FWER p-Value                      | 0.092                              |

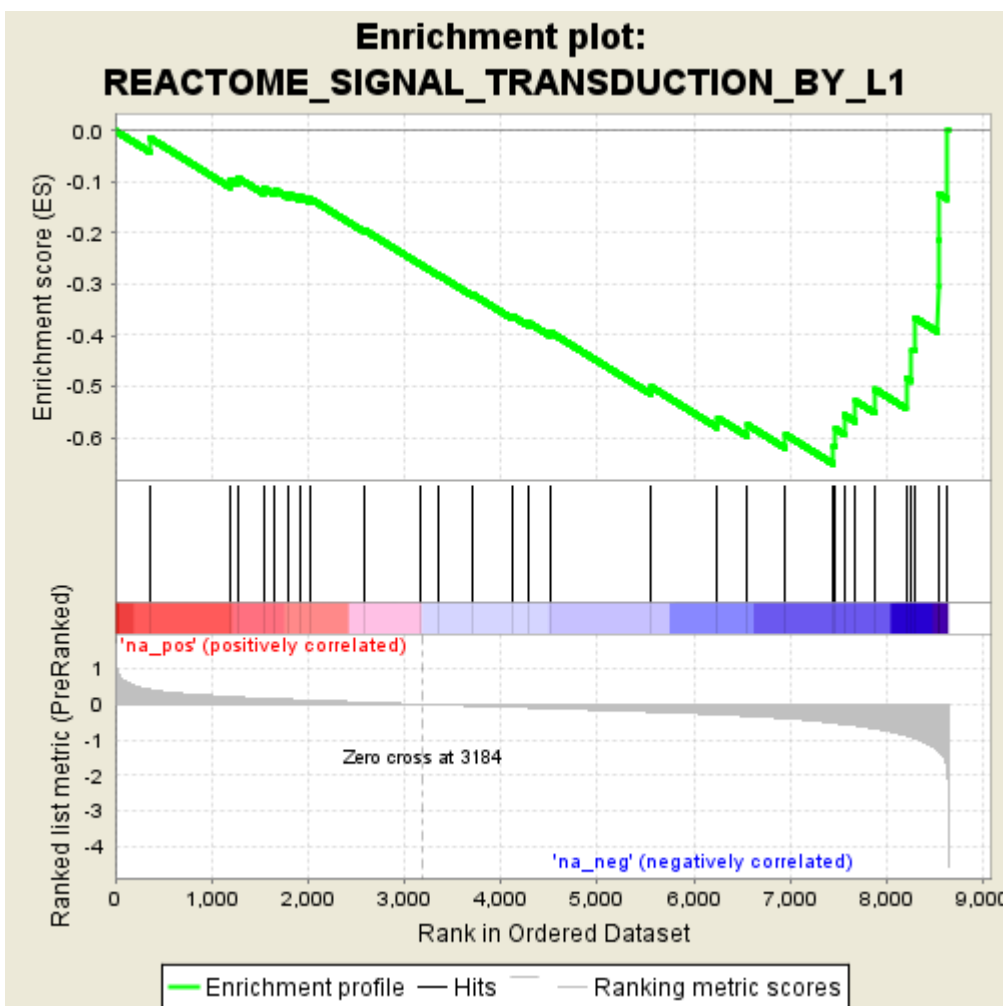

**Fig 1: Enrichment plot: REACTOME\_SIGNAL\_TRANSDUCTION\_BY\_L1**  
**Profile of the Running ES Score & Positions of GeneSet Members on the Rank Ordered List**

**Table: GSEA details [\[plain text format\]](#)**

| PROBE | GENE | GENE_TITLE | RANK | RANK | RUNNING | CORE |
|-------|------|------------|------|------|---------|------|
|-------|------|------------|------|------|---------|------|



|    |                         | SYMBOL                                                        |                                                                                                    | IN GENE LIST | METRIC SCORE | ES      | ENRICHMENT |
|----|-------------------------|---------------------------------------------------------------|----------------------------------------------------------------------------------------------------|--------------|--------------|---------|------------|
| 1  | <a href="#">CSNK2A1</a> | CSNK2A1<br><a href="#">Entrez</a> ,<br><a href="#">Source</a> | casein kinase 2, alpha 1 polypeptide                                                               | 364          | 0.408        | -0.0147 | No         |
| 2  | <a href="#">CLTC</a>    | CLTC<br><a href="#">Entrez</a> ,<br><a href="#">Source</a>    | clathrin, heavy chain (Hc)                                                                         | 1194         | 0.211        | -0.0968 | No         |
| 3  | <a href="#">NRP1</a>    | NRP1<br><a href="#">Entrez</a> ,<br><a href="#">Source</a>    | neuropilin 1                                                                                       | 1269         | 0.199        | -0.0919 | No         |
| 4  | <a href="#">RPS6KA1</a> | RPS6KA1<br><a href="#">Entrez</a> ,<br><a href="#">Source</a> | ribosomal protein S6 kinase, 90kDa, polypeptide 1                                                  | 1540         | 0.165        | -0.1121 | No         |
| 5  | <a href="#">ITGA5</a>   | ITGA5<br><a href="#">Entrez</a> ,<br><a href="#">Source</a>   | integrin, alpha 5 (fibronectin receptor, alpha polypeptide)                                        | 1658         | 0.151        | -0.1155 | No         |
| 6  | <a href="#">ITGA2B</a>  | ITGA2B<br><a href="#">Entrez</a> ,<br><a href="#">Source</a>  | integrin, alpha 2b (platelet glycoprotein IIb of IIb/IIIa complex, antigen CD41)                   | 1795         | 0.134        | -0.1222 | No         |
| 7  | <a href="#">AP2A1</a>   | AP2A1<br><a href="#">Entrez</a> ,<br><a href="#">Source</a>   | adaptor-related protein complex 2, alpha 1 subunit                                                 | 1919         | 0.121        | -0.1283 | No         |
| 8  | <a href="#">CLTA</a>    | CLTA<br><a href="#">Entrez</a> ,<br><a href="#">Source</a>    | clathrin, light chain (Lca)                                                                        | 2024         | 0.110        | -0.1330 | No         |
| 9  | <a href="#">RPS6KA4</a> | RPS6KA4<br><a href="#">Entrez</a> ,<br><a href="#">Source</a> | ribosomal protein S6 kinase, 90kDa, polypeptide 4                                                  | 2576         | 0.055        | -0.1933 | No         |
| 10 | <a href="#">RPS6KA2</a> | RPS6KA2<br><a href="#">Entrez</a> ,<br><a href="#">Source</a> | ribosomal protein S6 kinase, 90kDa, polypeptide 2                                                  | 3164         | 0.002        | -0.2614 | No         |
| 11 | <a href="#">EGFR</a>    | EGFR<br><a href="#">Entrez</a> ,<br><a href="#">Source</a>    | epidermal growth factor receptor (erythroblastic leukemia viral (v-erb-b) oncogene homolog, avian) | 3352         | -0.015       | -0.2821 | No         |
| 12 | <a href="#">ITGA9</a>   | ITGA9<br><a href="#">Entrez</a> ,<br><a href="#">Source</a>   | integrin, alpha 9                                                                                  | 3707         | -0.046       | -0.3201 | No         |
| 13 | <a href="#">AP2M1</a>   | AP2M1<br><a href="#">Entrez</a> ,<br><a href="#">Source</a>   | adaptor-related protein complex 2, mu 1 subunit                                                    | 4116         | -0.081       | -0.3621 | No         |
| 14 | <a href="#">NCAM1</a>   | NCAM1<br><a href="#">Entrez</a> ,<br><a href="#">Source</a>   | neural cell adhesion molecule 1                                                                    | 4284         | -0.095       | -0.3751 | No         |
| 15 | <a href="#">MAPK3</a>   | MAPK3<br><a href="#">Entrez</a> ,<br><a href="#">Source</a>   | mitogen-activated protein kinase 3                                                                 | 4509         | -0.114       | -0.3934 | No         |

|    |                         |                                                                               |                                                                                              |      |        |         |     |
|----|-------------------------|-------------------------------------------------------------------------------|----------------------------------------------------------------------------------------------|------|--------|---------|-----|
| 16 | <a href="#">MAP2K1</a>  | <a href="#">MAP2K1</a><br><a href="#">Entrez</a> ,<br><a href="#">Source</a>  | mitogen-activated protein kinase kinase 1                                                    | 5558 | -0.211 | -0.5010 | No  |
| 17 | <a href="#">FGFR1</a>   | <a href="#">FGFR1</a><br><a href="#">Entrez</a> ,<br><a href="#">Source</a>   | fibroblast growth factor receptor 1 (fms-related tyrosine kinase 2, Pfeiffer syndrome)       | 6245 | -0.286 | -0.5614 | No  |
| 18 | <a href="#">CSNK2B</a>  | <a href="#">CSNK2B</a><br><a href="#">Entrez</a> ,<br><a href="#">Source</a>  | casein kinase 2, beta polypeptide                                                            | 6556 | -0.328 | -0.5752 | No  |
| 19 | <a href="#">ITGB1</a>   | <a href="#">ITGB1</a><br><a href="#">Entrez</a> ,<br><a href="#">Source</a>   | integrin, beta 1 (fibronectin receptor, beta polypeptide, antigen CD29 includes MDF2, MSK12) | 6950 | -0.397 | -0.5941 | No  |
| 20 | <a href="#">MAPK1</a>   | <a href="#">MAPK1</a><br><a href="#">Entrez</a> ,<br><a href="#">Source</a>   | mitogen-activated protein kinase 1                                                           | 7446 | -0.522 | -0.6163 | Yes |
| 21 | <a href="#">CSNK2A2</a> | <a href="#">CSNK2A2</a><br><a href="#">Entrez</a> ,<br><a href="#">Source</a> | casein kinase 2, alpha prime polypeptide                                                     | 7468 | -0.530 | -0.5829 | Yes |
| 22 | <a href="#">RPS6KA3</a> | <a href="#">RPS6KA3</a><br><a href="#">Entrez</a> ,<br><a href="#">Source</a> | ribosomal protein S6 kinase, 90kDa, polypeptide 3                                            | 7559 | -0.558 | -0.5557 | Yes |
| 23 | <a href="#">RPS6KA6</a> | <a href="#">RPS6KA6</a><br><a href="#">Entrez</a> ,<br><a href="#">Source</a> | ribosomal protein S6 kinase, 90kDa, polypeptide 6                                            | 7676 | -0.599 | -0.5287 | Yes |
| 24 | <a href="#">PAK1</a>    | <a href="#">PAK1</a><br><a href="#">Entrez</a> ,<br><a href="#">Source</a>    | p21/Cdc42/Rac1-activated kinase 1 (STE20 homolog, yeast)                                     | 7877 | -0.686 | -0.5055 | Yes |
| 25 | <a href="#">L1CAM</a>   | <a href="#">L1CAM</a><br><a href="#">Entrez</a> ,<br><a href="#">Source</a>   | L1 cell adhesion molecule                                                                    | 8199 | -0.881 | -0.4833 | Yes |
| 26 | <a href="#">AP2A2</a>   | <a href="#">AP2A2</a><br><a href="#">Entrez</a> ,<br><a href="#">Source</a>   | adaptor-related protein complex 2, alpha 2 subunit                                           | 8259 | -0.929 | -0.4274 | Yes |
| 27 | <a href="#">RAC1</a>    | <a href="#">RAC1</a><br><a href="#">Entrez</a> ,<br><a href="#">Source</a>    | ras-related C3 botulinum toxin substrate 1 (rho family, small GTP binding protein Rac1)      | 8293 | -0.964 | -0.3661 | Yes |
| 28 | <a href="#">ITGAV</a>   | <a href="#">ITGAV</a><br><a href="#">Entrez</a> ,<br><a href="#">Source</a>   | integrin, alpha V (vitronectin receptor, alpha polypeptide, antigen CD51)                    | 8530 | -1.325 | -0.3040 | Yes |
| 29 | <a href="#">SH3GL2</a>  | <a href="#">SH3GL2</a><br><a href="#">Entrez</a> ,<br><a href="#">Source</a>  | SH3-domain GRB2-like 2                                                                       | 8533 | -1.335 | -0.2140 | Yes |
| 30 | <a href="#">AP2B1</a>   | <a href="#">AP2B1</a><br><a href="#">Entrez</a> ,<br><a href="#">Source</a>   | adaptor-related protein complex 2, beta 1 subunit                                            | 8540 | -1.348 | -0.1237 | Yes |
| 31 | <a href="#">RPS6KA5</a> | <a href="#">RPS6KA5</a><br><a href="#">Entrez</a> ,<br><a href="#">Source</a> | ribosomal protein S6 kinase, 90kDa, polypeptide 5                                            | 8631 | -1.996 | 0.0007  | Yes |

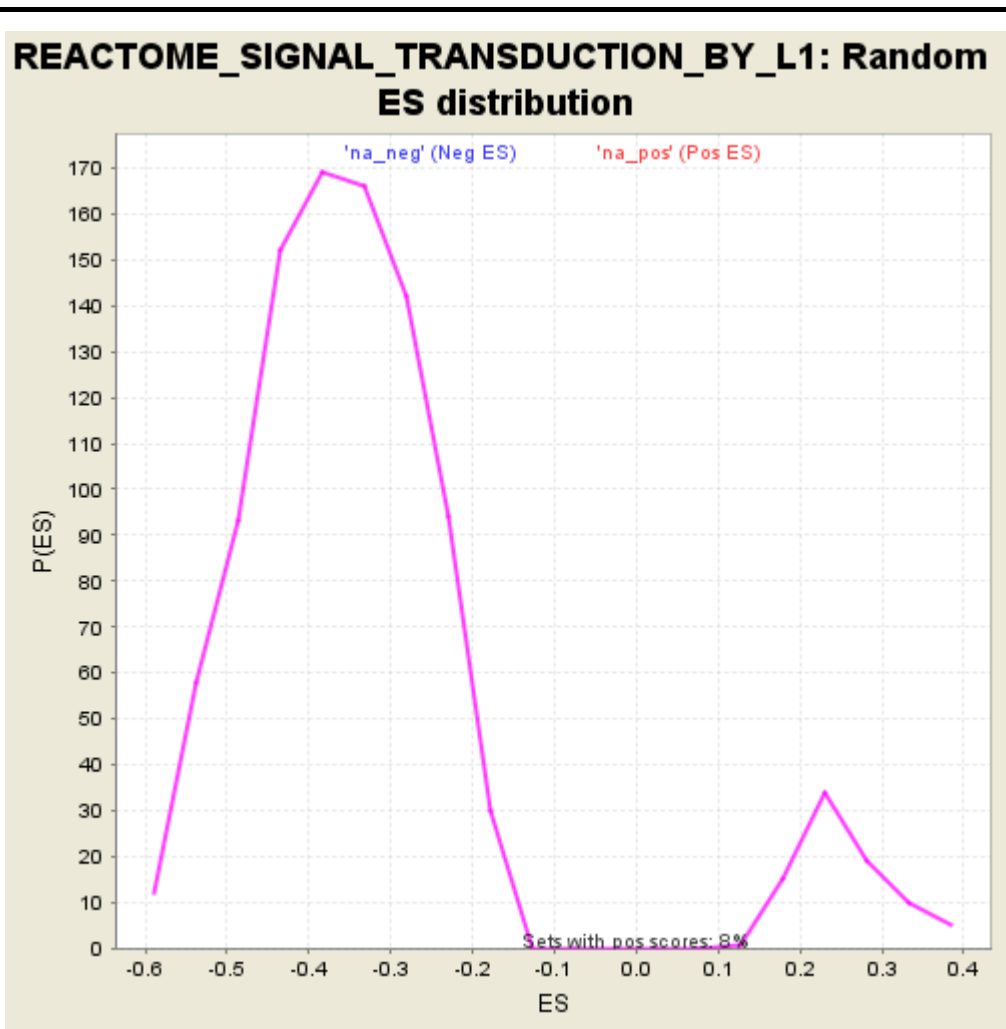

**Fig 2: REACTOME\_SIGNAL\_TRANSDUCTION\_BY\_L1: Random ES distribution**  
**Gene set null distribution of ES for REACTOME\_SIGNAL\_TRANSDUCTION\_BY\_L1**

**Table: GSEA Results Summary**

|                                   |                                                      |
|-----------------------------------|------------------------------------------------------|
| Dataset                           | GSEA_18M_collapsed                                   |
| Phenotype                         | NoPhenotypeAvailable                                 |
| Upregulated in class              | na_neg                                               |
| GeneSet                           | REACTOME_ANTIVIRAL_MECHANISM_BY_IFN_STIMULATED_GENES |
| Enrichment Score (ES)             | -0.6171727                                           |
| Normalized Enrichment Score (NES) | -1.7333592                                           |
| Nominal p-value                   | 0.0010695187                                         |
| FDR q-value                       | 0.071224384                                          |
| FWER p-Value                      | 0.187                                                |

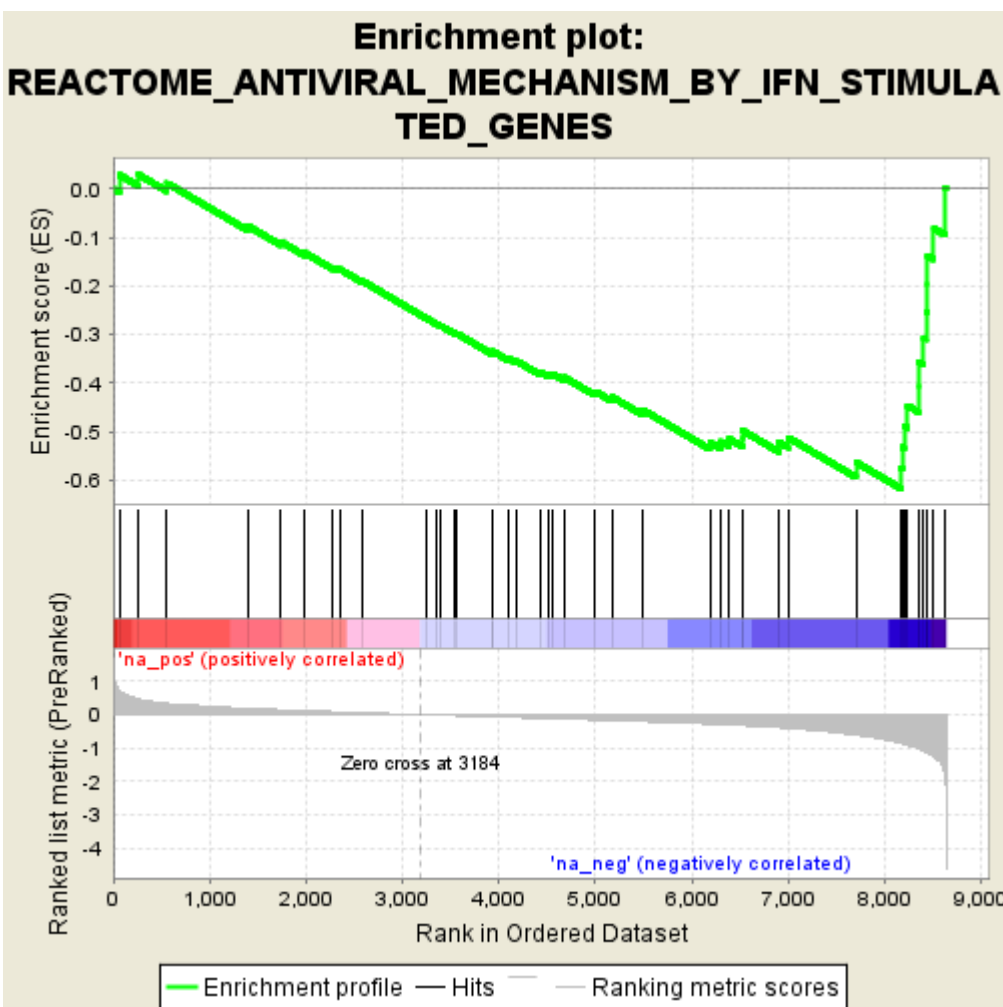

**Fig 1: Enrichment plot:  
 REACTOME\_ANTIVIRAL\_MECHANISM\_BY\_IFN\_STIMULATED\_GENES  
 Profile of the Running ES Score & Positions of GeneSet Members on the Rank  
 Ordered List**

**Table: GSEA details** [\[plain text format\]](#)

|    | PROBE                   | GENE SYMBOL                                                   | GENE_TITLE                                                              | RANK IN GENE LIST | RANK METRIC SCORE | RUNNING ES | CORE ENRICHMENT |
|----|-------------------------|---------------------------------------------------------------|-------------------------------------------------------------------------|-------------------|-------------------|------------|-----------------|
| 1  | <a href="#">NUP85</a>   | NUP85<br><a href="#">Entrez</a> ,<br><a href="#">Source</a>   | nucleoporin 85kDa                                                       | 65                | 0.719             | 0.0290     | No              |
| 2  | <a href="#">FLNB</a>    | FLNB<br><a href="#">Entrez</a> ,<br><a href="#">Source</a>    | filamin B, beta (actin binding protein 278)                             | 263               | 0.460             | 0.0294     | No              |
| 3  | <a href="#">IRF3</a>    | IRF3<br><a href="#">Entrez</a> ,<br><a href="#">Source</a>    | interferon regulatory factor 3                                          | 558               | 0.331             | 0.0120     | No              |
| 4  | <a href="#">NUP210</a>  | NUP210<br><a href="#">Entrez</a> ,<br><a href="#">Source</a>  | nucleoporin 210kDa                                                      | 1396              | 0.182             | -0.0761    | No              |
| 5  | <a href="#">EIF2AK2</a> | EIF2AK2<br><a href="#">Entrez</a> ,<br><a href="#">Source</a> | eukaryotic translation initiation factor 2-alpha kinase 2               | 1740              | 0.141             | -0.1089    | No              |
| 6  | <a href="#">EIF4E3</a>  | EIF4E3<br><a href="#">Entrez</a> ,<br><a href="#">Source</a>  | eukaryotic translation initiation factor 4E member 3                    | 1983              | 0.114             | -0.1312    | No              |
| 7  | <a href="#">NUP188</a>  | NUP188<br><a href="#">Entrez</a> ,<br><a href="#">Source</a>  | nucleoporin 188kDa                                                      | 2280              | 0.085             | -0.1614    | No              |
| 8  | <a href="#">NUP43</a>   | NUP43<br><a href="#">Entrez</a> ,<br><a href="#">Source</a>   | nucleoporin 43kDa                                                       | 2347              | 0.079             | -0.1651    | No              |
| 9  | <a href="#">RAE1</a>    | RAE1<br><a href="#">Entrez</a> ,<br><a href="#">Source</a>    | RAE1 RNA export 1 homolog (S. pombe)                                    | 2583              | 0.055             | -0.1896    | No              |
| 10 | <a href="#">IFIT1</a>   | IFIT1<br><a href="#">Entrez</a> ,<br><a href="#">Source</a>   | interferon-induced protein with tetratricopeptide repeats 1             | 3247              | -0.006            | -0.2665    | No              |
| 11 | <a href="#">TPR</a>     | TPR<br><a href="#">Entrez</a> ,<br><a href="#">Source</a>     | translocated promoter region (to activated MET oncogene)                | 3356              | -0.015            | -0.2783    | No              |
| 12 | <a href="#">EIF4G3</a>  | EIF4G3<br><a href="#">Entrez</a> ,<br><a href="#">Source</a>  | eukaryotic translation initiation factor 4 gamma, 3                     | 3402              | -0.019            | -0.2826    | No              |
| 13 | <a href="#">AAAS</a>    | AAAS<br><a href="#">Entrez</a> ,<br><a href="#">Source</a>    | achalasia, adrenocortical insufficiency, alacrimia (Allgrove, triple-A) | 3532              | -0.029            | -0.2961    | No              |
| 14 | <a href="#">RANBP2</a>  | RANBP2<br><a href="#">Entrez</a> ,<br><a href="#">Source</a>  | RAN binding protein 2                                                   | 3558              | -0.032            | -0.2974    | No              |
| 15 | <a href="#">EIF4G2</a>  | EIF4G2<br><a href="#">Entrez</a> ,<br><a href="#">Source</a>  | eukaryotic translation initiation factor 4 gamma, 2                     | 3929              | -0.064            | -0.3372    | No              |

|    |                        |                                                              |                                                                 |      |        |         |    |
|----|------------------------|--------------------------------------------------------------|-----------------------------------------------------------------|------|--------|---------|----|
| 16 | <a href="#">NUP153</a> | NUP153<br><a href="#">Entrez</a> ,<br><a href="#">Source</a> | nucleoporin 153kDa                                              | 3931 | -0.064 | -0.3341 | No |
| 17 | <a href="#">USP18</a>  | USP18<br><a href="#">Entrez</a> ,<br><a href="#">Source</a>  | ubiquitin specific peptidase 18                                 | 4105 | -0.080 | -0.3501 | No |
| 18 | <a href="#">PIN1</a>   | PIN1<br><a href="#">Entrez</a> ,<br><a href="#">Source</a>   | protein (peptidylprolyl cis/trans isomerase) NIMA-interacting 1 | 4183 | -0.087 | -0.3547 | No |
| 19 | <a href="#">NUP62</a>  | NUP62<br><a href="#">Entrez</a> ,<br><a href="#">Source</a>  | nucleoporin 62kDa                                               | 4427 | -0.107 | -0.3775 | No |
| 20 | <a href="#">MAPK3</a>  | MAPK3<br><a href="#">Entrez</a> ,<br><a href="#">Source</a>  | mitogen-activated protein kinase 3                              | 4509 | -0.114 | -0.3812 | No |
| 21 | <a href="#">TRIM25</a> | TRIM25<br><a href="#">Entrez</a> ,<br><a href="#">Source</a> | tripartite motif-containing 25                                  | 4556 | -0.117 | -0.3806 | No |
| 22 | <a href="#">HERC5</a>  | HERC5<br><a href="#">Entrez</a> ,<br><a href="#">Source</a>  | hect domain and RLD 5                                           | 4674 | -0.128 | -0.3877 | No |
| 23 | <a href="#">UBE2N</a>  | UBE2N<br><a href="#">Entrez</a> ,<br><a href="#">Source</a>  | ubiquitin-conjugating enzyme E2N (UBC13 homolog, yeast)         | 4997 | -0.157 | -0.4172 | No |
| 24 | <a href="#">NUP205</a> | NUP205<br><a href="#">Entrez</a> ,<br><a href="#">Source</a> | nucleoporin 205kDa                                              | 5172 | -0.173 | -0.4286 | No |
| 25 | <a href="#">NUP214</a> | NUP214<br><a href="#">Entrez</a> ,<br><a href="#">Source</a> | nucleoporin 214kDa                                              | 5488 | -0.204 | -0.4549 | No |
| 26 | <a href="#">NUP93</a>  | NUP93<br><a href="#">Entrez</a> ,<br><a href="#">Source</a>  | nucleoporin 93kDa                                               | 6187 | -0.278 | -0.5220 | No |
| 27 | <a href="#">EIF4E2</a> | EIF4E2<br><a href="#">Entrez</a> ,<br><a href="#">Source</a> | eukaryotic translation initiation factor 4E member 2            | 6298 | -0.292 | -0.5200 | No |
| 28 | <a href="#">NUP54</a>  | NUP54<br><a href="#">Entrez</a> ,<br><a href="#">Source</a>  | nucleoporin 54kDa                                               | 6387 | -0.303 | -0.5148 | No |
| 29 | <a href="#">NUP50</a>  | NUP50<br><a href="#">Entrez</a> ,<br><a href="#">Source</a>  | nucleoporin 50kDa                                               | 6523 | -0.323 | -0.5141 | No |
| 30 | <a href="#">KPNA2</a>  | KPNA2<br><a href="#">Entrez</a> ,<br><a href="#">Source</a>  | karyopherin alpha 2 (RAG cohort 1, importin alpha 1)            | 6526 | -0.323 | -0.4979 | No |
| 31 | <a href="#">EIF4E</a>  | EIF4E<br><a href="#">Entrez</a> ,<br><a href="#">Source</a>  | eukaryotic translation initiation factor 4E                     | 6901 | -0.388 | -0.5217 | No |
| 32 | <a href="#">STAT1</a>  | STAT1<br><a href="#">Entrez</a> ,<br><a href="#">Source</a>  | signal transducer and activator of transcription 1, 91kDa       | 6998 | -0.406 | -0.5122 | No |

|    |                        |                                                              |                                                                                  |      |        |         |     |
|----|------------------------|--------------------------------------------------------------|----------------------------------------------------------------------------------|------|--------|---------|-----|
| 33 | <a href="#">NUP133</a> | NUP133<br><a href="#">Entrez</a> ,<br><a href="#">Source</a> | nucleoporin 133kDa                                                               | 7701 | -0.608 | -0.5629 | No  |
| 34 | <a href="#">NUPL1</a>  | NUPL1<br><a href="#">Entrez</a> ,<br><a href="#">Source</a>  | nucleoporin like 1                                                               | 8168 | -0.851 | -0.5739 | Yes |
| 35 | <a href="#">EIF4G1</a> | EIF4G1<br><a href="#">Entrez</a> ,<br><a href="#">Source</a> | eukaryotic translation initiation factor 4 gamma, 1                              | 8184 | -0.864 | -0.5318 | Yes |
| 36 | <a href="#">SEH1L</a>  | SEH1L<br><a href="#">Entrez</a> ,<br><a href="#">Source</a>  | SEH1-like (S. cerevisiae)                                                        | 8202 | -0.884 | -0.4888 | Yes |
| 37 | <a href="#">JAK1</a>   | JAK1<br><a href="#">Entrez</a> ,<br><a href="#">Source</a>   | Janus kinase 1 (a protein tyrosine kinase)                                       | 8234 | -0.908 | -0.4463 | Yes |
| 38 | <a href="#">NEDD4</a>  | NEDD4<br><a href="#">Entrez</a> ,<br><a href="#">Source</a>  | neural precursor cell expressed, developmentally down-regulated 4                | 8350 | -1.020 | -0.4078 | Yes |
| 39 | <a href="#">KPNA1</a>  | KPNA1<br><a href="#">Entrez</a> ,<br><a href="#">Source</a>  | karyopherin alpha 1 (importin alpha 5)                                           | 8352 | -1.020 | -0.3561 | Yes |
| 40 | <a href="#">EIF4A1</a> | EIF4A1<br><a href="#">Entrez</a> ,<br><a href="#">Source</a> | eukaryotic translation initiation factor 4A, isoform 1                           | 8402 | -1.078 | -0.3070 | Yes |
| 41 | <a href="#">PPM1B</a>  | PPM1B<br><a href="#">Entrez</a> ,<br><a href="#">Source</a>  | protein phosphatase 1B (formerly 2C), magnesium-dependent, beta isoform          | 8427 | -1.116 | -0.2530 | Yes |
| 42 | <a href="#">ARIH1</a>  | ARIH1<br><a href="#">Entrez</a> ,<br><a href="#">Source</a>  | ariadne homolog, ubiquitin-conjugating enzyme E2 binding protein, 1 (Drosophila) | 8440 | -1.150 | -0.1960 | Yes |
| 43 | <a href="#">KPNA3</a>  | KPNA3<br><a href="#">Entrez</a> ,<br><a href="#">Source</a>  | karyopherin alpha 3 (importin alpha 4)                                           | 8442 | -1.152 | -0.1375 | Yes |
| 44 | <a href="#">KPNA4</a>  | KPNA4<br><a href="#">Entrez</a> ,<br><a href="#">Source</a>  | karyopherin alpha 4 (importin alpha 3)                                           | 8508 | -1.248 | -0.0816 | Yes |
| 45 | <a href="#">KPNB1</a>  | KPNB1<br><a href="#">Entrez</a> ,<br><a href="#">Source</a>  | karyopherin (importin) beta 1                                                    | 8626 | -1.899 | 0.0013  | Yes |

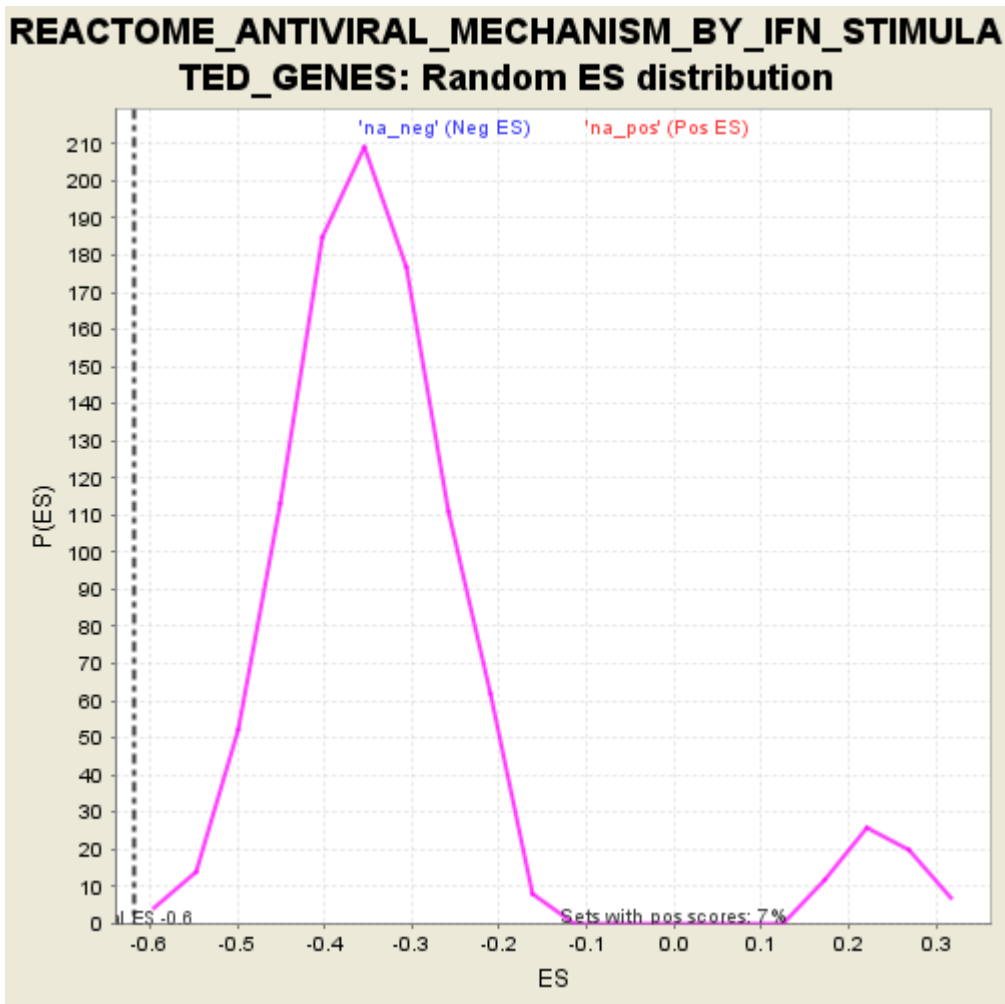

**Fig 2: REACTOME\_ANTIVIRAL\_MECHANISM\_BY\_IFN\_STIMULATED\_GENES: Random ES distribution**  
**Gene set null distribution of ES for**  
**REACTOME\_ANTIVIRAL\_MECHANISM\_BY\_IFN\_STIMULATED\_GENES**



**Table: GSEA Results Summary**

|                                   |                              |
|-----------------------------------|------------------------------|
| Dataset                           | GSEA_18M_collapsed           |
| Phenotype                         | NoPhenotypeAvailable         |
| Upregulated in class              | na_neg                       |
| GeneSet                           | REACTOME_EGFR_DOWNREGULATION |
| Enrichment Score (ES)             | -0.71340793                  |
| Normalized Enrichment Score (NES) | -1.724851                    |
| Nominal p-value                   | 0.0023364485                 |
| FDR q-value                       | 0.06289053                   |
| FWER p-Value                      | 0.217                        |

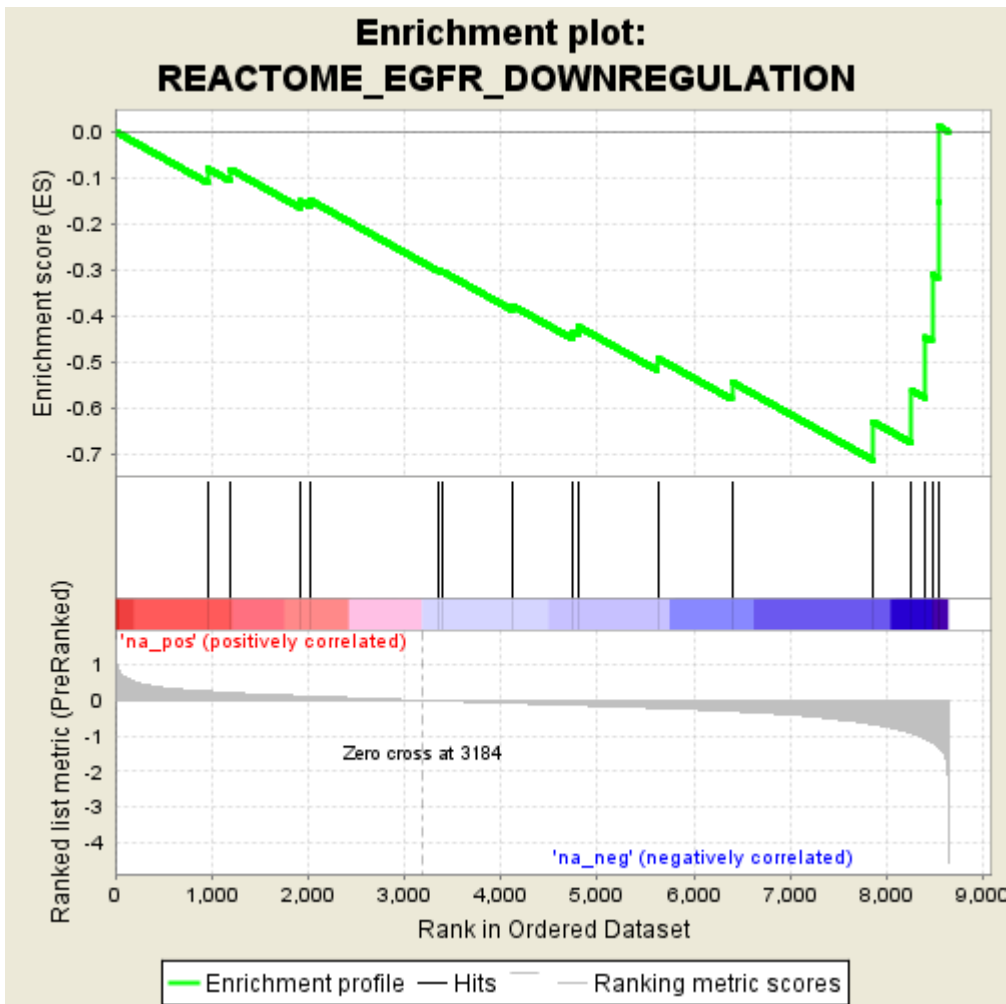

**Fig 1: Enrichment plot: REACTOME\_EGFR\_DOWNREGULATION**  
**Profile of the Running ES Score & Positions of GeneSet Members on the Rank Ordered List**

**Table: GSEA details [\[plain text format\]](#)**

| PROBE | GENE | GENE_TITLE | RANK | RANK | RUNNING | CORE |
|-------|------|------------|------|------|---------|------|
|-------|------|------------|------|------|---------|------|

|    |                         | SYMBOL                                                        |                                                                                                    | IN GENE LIST | METRIC SCORE | ES      | ENRICHMENT |
|----|-------------------------|---------------------------------------------------------------|----------------------------------------------------------------------------------------------------|--------------|--------------|---------|------------|
| 1  | <a href="#">EPS15L1</a> | EPS15L1<br><a href="#">Entrez</a> ,<br><a href="#">Source</a> | epidermal growth factor receptor pathway substrate 15-like 1                                       | 960          | 0.250        | -0.0807 | No         |
| 2  | <a href="#">CLTC</a>    | CLTC<br><a href="#">Entrez</a> ,<br><a href="#">Source</a>    | clathrin, heavy chain (Hc)                                                                         | 1194         | 0.211        | -0.0818 | No         |
| 3  | <a href="#">AP2A1</a>   | AP2A1<br><a href="#">Entrez</a> ,<br><a href="#">Source</a>   | adaptor-related protein complex 2, alpha 1 subunit                                                 | 1919         | 0.121        | -0.1509 | No         |
| 4  | <a href="#">CLTA</a>    | CLTA<br><a href="#">Entrez</a> ,<br><a href="#">Source</a>    | clathrin, light chain (Lca)                                                                        | 2024         | 0.110        | -0.1495 | No         |
| 5  | <a href="#">EGFR</a>    | EGFR<br><a href="#">Entrez</a> ,<br><a href="#">Source</a>    | epidermal growth factor receptor (erythroblastic leukemia viral (v-erb-b) oncogene homolog, avian) | 3352         | -0.015       | -0.3016 | No         |
| 6  | <a href="#">EPN1</a>    | EPN1<br><a href="#">Entrez</a> ,<br><a href="#">Source</a>    | epsin 1                                                                                            | 3398         | -0.019       | -0.3045 | No         |
| 7  | <a href="#">AP2M1</a>   | AP2M1<br><a href="#">Entrez</a> ,<br><a href="#">Source</a>   | adaptor-related protein complex 2, mu 1 subunit                                                    | 4116         | -0.081       | -0.3778 | No         |
| 8  | <a href="#">GRB2</a>    | GRB2<br><a href="#">Entrez</a> ,<br><a href="#">Source</a>    | growth factor receptor-bound protein 2                                                             | 4744         | -0.134       | -0.4341 | No         |
| 9  | <a href="#">SPRY2</a>   | SPRY2<br><a href="#">Entrez</a> ,<br><a href="#">Source</a>   | sprouty homolog 2 (Drosophila)                                                                     | 4802         | -0.139       | -0.4236 | No         |
| 10 | <a href="#">STAM</a>    | STAM<br><a href="#">Entrez</a> ,<br><a href="#">Source</a>    | signal transducing adaptor molecule (SH3 domain and ITAM motif) 1                                  | 5624         | -0.217       | -0.4923 | No         |
| 11 | <a href="#">STAM2</a>   | STAM2<br><a href="#">Entrez</a> ,<br><a href="#">Source</a>   | signal transducing adaptor molecule (SH3 domain and ITAM motif) 2                                  | 6394         | -0.305       | -0.5441 | No         |
| 12 | <a href="#">SH3KBP1</a> | SH3KBP1<br><a href="#">Entrez</a> ,<br><a href="#">Source</a> | SH3-domain kinase binding protein 1                                                                | 7855         | -0.678       | -0.6301 | Yes        |
| 13 | <a href="#">AP2A2</a>   | AP2A2<br><a href="#">Entrez</a> ,<br><a href="#">Source</a>   | adaptor-related protein complex 2, alpha 2 subunit                                                 | 8259         | -0.929       | -0.5628 | Yes        |
| 14 | <a href="#">CBL</a>     | CBL<br><a href="#">Entrez</a> ,<br><a href="#">Source</a>     | Cas-Br-M (murine) ecotropic retroviral transforming sequence                                       | 8393         | -1.070       | -0.4468 | Yes        |
| 15 | <a href="#">EPS15</a>   | EPS15<br><a href="#">Entrez</a> ,<br><a href="#">Source</a>   | epidermal growth factor receptor pathway substrate 15                                              | 8469         | -1.184       | -0.3101 | Yes        |

|    |                        |                                                              |                                                   |      |        |         |     |
|----|------------------------|--------------------------------------------------------------|---------------------------------------------------|------|--------|---------|-----|
| 16 | <a href="#">SH3GL2</a> | SH3GL2<br><a href="#">Entrez</a> ,<br><a href="#">Source</a> | SH3-domain GRB2-like 2                            | 8533 | -1.335 | -0.1535 | Yes |
| 17 | <a href="#">AP2B1</a>  | AP2B1<br><a href="#">Entrez</a> ,<br><a href="#">Source</a>  | adaptor-related protein complex 2, beta 1 subunit | 8540 | -1.348 | 0.0113  | Yes |

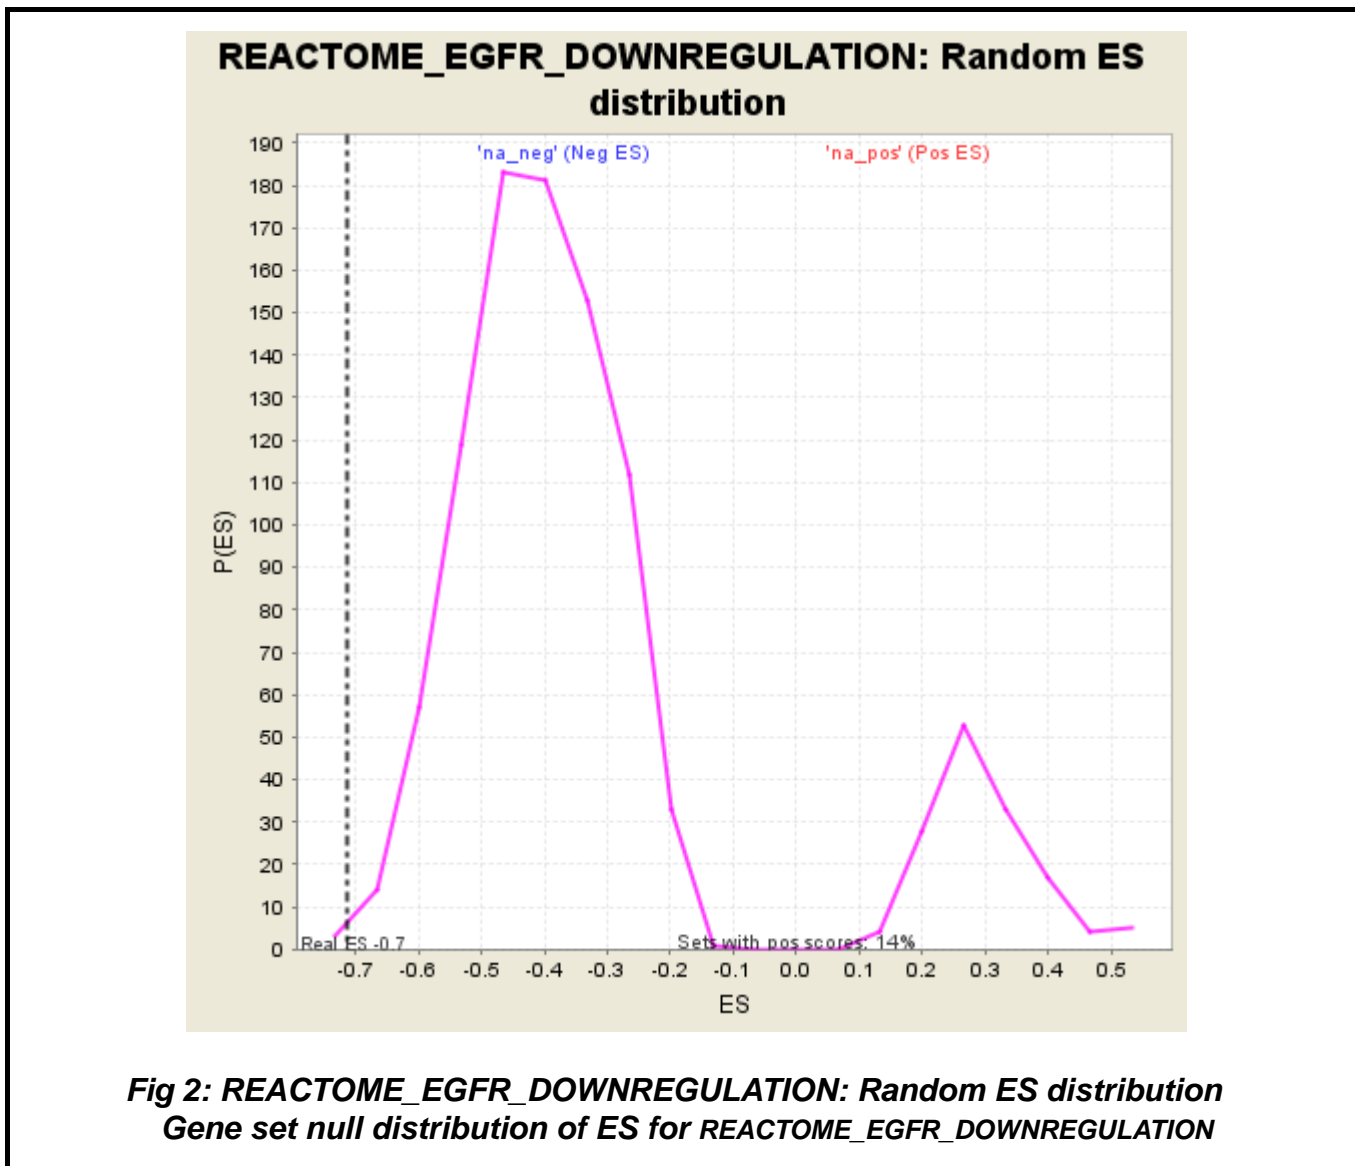

**Fig 2: REACTOME\_EGFR\_DOWNREGULATION: Random ES distribution**  
**Gene set null distribution of ES for REACTOME\_EGFR\_DOWNREGULATION**

**Table: GSEA Results Summary**

|                                   |                                                          |
|-----------------------------------|----------------------------------------------------------|
| Dataset                           | GSEA_18M_collapsed                                       |
| Phenotype                         | NoPhenotypeAvailable                                     |
| Upregulated in class              | na_neg                                                   |
| GeneSet                           | REACTOME_GABA_SYNTHESIS_RELEASE_REUPTAKE_AND_DEGRADATION |
| Enrichment Score (ES)             | -0.7022085                                               |
| Normalized Enrichment Score (NES) | -1.6867505                                               |
| Nominal p-value                   | 0.0023923444                                             |
| FDR q-value                       | 0.09922064                                               |
| FWER p-Value                      | 0.384                                                    |

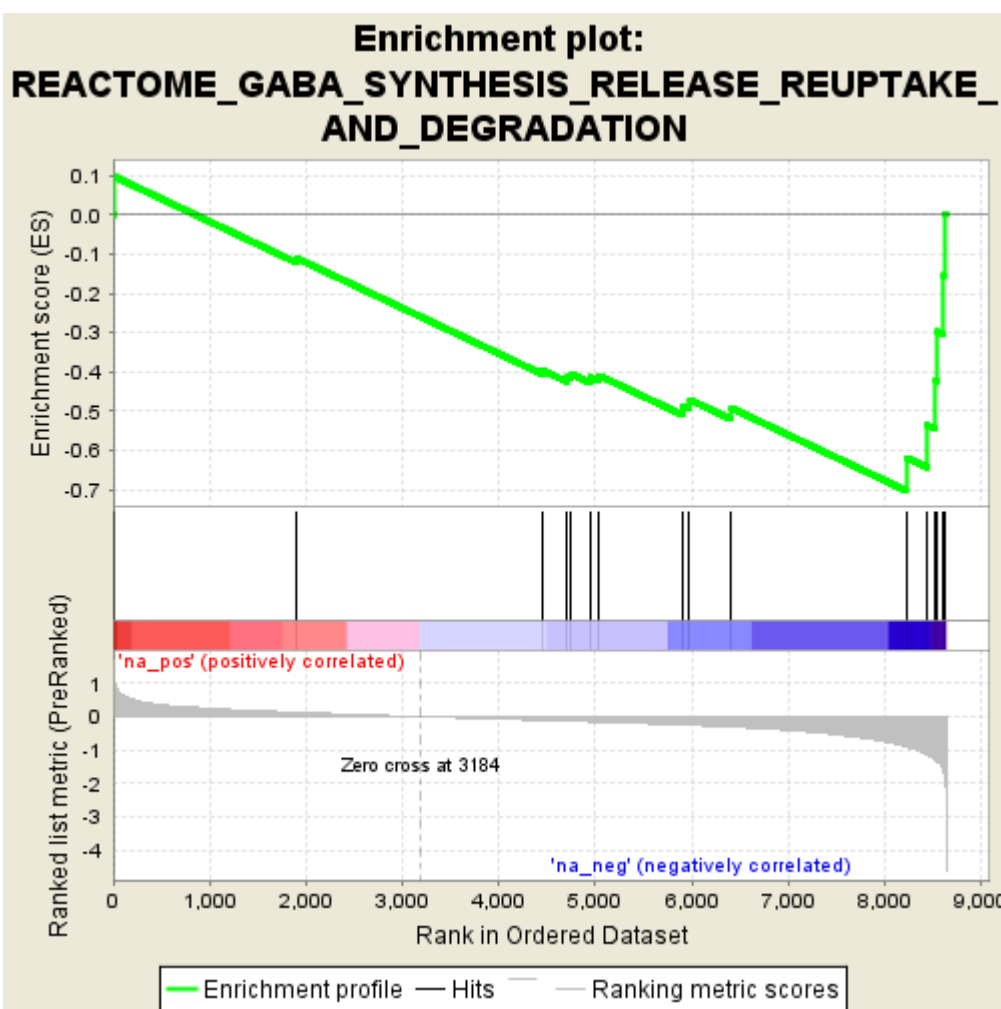

**Fig 1: Enrichment plot:  
 REACTOME\_GABA\_SYNTHESIS\_RELEASE\_REUPTAKE\_AND\_DEGRADATION  
 Profile of the Running ES Score & Positions of GeneSet Members on the Rank  
 Ordered List**

**Table: GSEA details [plain text format]**

|    | PROBE                   | GENE SYMBOL                                                   | GENE_TITLE                                                                        | RANK IN GENE LIST | RANK METRIC SCORE | RUNNING ES | CORE ENRICHMENT |
|----|-------------------------|---------------------------------------------------------------|-----------------------------------------------------------------------------------|-------------------|-------------------|------------|-----------------|
| 1  | <a href="#">SLC6A1</a>  | SLC6A1<br><a href="#">Entrez</a> ,<br><a href="#">Source</a>  | solute carrier family 6 (neurotransmitter transporter, GABA), member 1            | 13                | 1.049             | 0.0968     | No              |
| 2  | <a href="#">HSPA8</a>   | HSPA8<br><a href="#">Entrez</a> ,<br><a href="#">Source</a>   | heat shock 70kDa protein 8                                                        | 1905              | 0.122             | -0.1110    | No              |
| 3  | <a href="#">STX1A</a>   | STX1A<br><a href="#">Entrez</a> ,<br><a href="#">Source</a>   | syntaxin 1A (brain)                                                               | 4451              | -0.109            | -0.3960    | No              |
| 4  | <a href="#">SLC6A11</a> | SLC6A11<br><a href="#">Entrez</a> ,<br><a href="#">Source</a> | solute carrier family 6 (neurotransmitter transporter, GABA), member 11           | 4708              | -0.130            | -0.4135    | No              |
| 5  | <a href="#">ALDH5A1</a> | ALDH5A1<br><a href="#">Entrez</a> ,<br><a href="#">Source</a> | aldehyde dehydrogenase 5 family, member A1 (succinate-semialdehyde dehydrogenase) | 4750              | -0.134            | -0.4056    | No              |
| 6  | <a href="#">RIMS1</a>   | RIMS1<br><a href="#">Entrez</a> ,<br><a href="#">Source</a>   | regulating synaptic membrane exocytosis 1                                         | 4945              | -0.153            | -0.4138    | No              |
| 7  | <a href="#">SLC32A1</a> | SLC32A1<br><a href="#">Entrez</a> ,<br><a href="#">Source</a> | solute carrier family 32 (GABA vesicular transporter), member 1                   | 5034              | -0.160            | -0.4090    | No              |
| 8  | <a href="#">ABAT</a>    | ABAT<br><a href="#">Entrez</a> ,<br><a href="#">Source</a>    | 4-aminobutyrate aminotransferase                                                  | 5908              | -0.247            | -0.4871    | No              |
| 9  | <a href="#">SLC6A12</a> | SLC6A12<br><a href="#">Entrez</a> ,<br><a href="#">Source</a> | solute carrier family 6 (neurotransmitter transporter, betaine/GABA), member 12   | 5976              | -0.256            | -0.4709    | No              |
| 10 | <a href="#">SNAP25</a>  | SNAP25<br><a href="#">Entrez</a> ,<br><a href="#">Source</a>  | synaptosomal-associated protein, 25kDa                                            | 6408              | -0.306            | -0.4922    | No              |
| 11 | <a href="#">GAD2</a>    | GAD2<br><a href="#">Entrez</a> ,<br><a href="#">Source</a>    | glutamate decarboxylase 2 (pancreatic islets and brain, 65kDa)                    | 8220              | -0.898            | -0.6181    | Yes             |
| 12 | <a href="#">GAD1</a>    | GAD1<br><a href="#">Entrez</a> ,<br><a href="#">Source</a>    | glutamate decarboxylase 1 (brain, 67kDa)                                          | 8441              | -1.150            | -0.5358    | Yes             |
| 13 | <a href="#">VAMP2</a>   | VAMP2<br><a href="#">Entrez</a> ,<br><a href="#">Source</a>   | vesicle-associated membrane protein 2 (synaptobrevin 2)                           | 8526              | -1.314            | -0.4223    | Yes             |
| 14 | <a href="#">DNAJC5</a>  | DNAJC5<br><a href="#">Entrez</a> ,<br><a href="#">Source</a>  | DnaJ (Hsp40) homolog, subfamily C, member 5                                       | 8545              | -1.363            | -0.2966    | Yes             |
| 15 | <a href="#">STXBP1</a>  | STXBP1<br><a href="#">Entrez</a> ,<br><a href="#">Source</a>  | syntaxin binding protein 1                                                        | 8609              | -1.599            | -0.1541    | Yes             |

|    |                      |                                                            |                 |      |        |        |     |
|----|----------------------|------------------------------------------------------------|-----------------|------|--------|--------|-----|
| 16 | <a href="#">SYT1</a> | SYT1<br><a href="#">Entrez</a> ,<br><a href="#">Source</a> | synaptotagmin I | 8615 | -1.677 | 0.0026 | Yes |
|----|----------------------|------------------------------------------------------------|-----------------|------|--------|--------|-----|

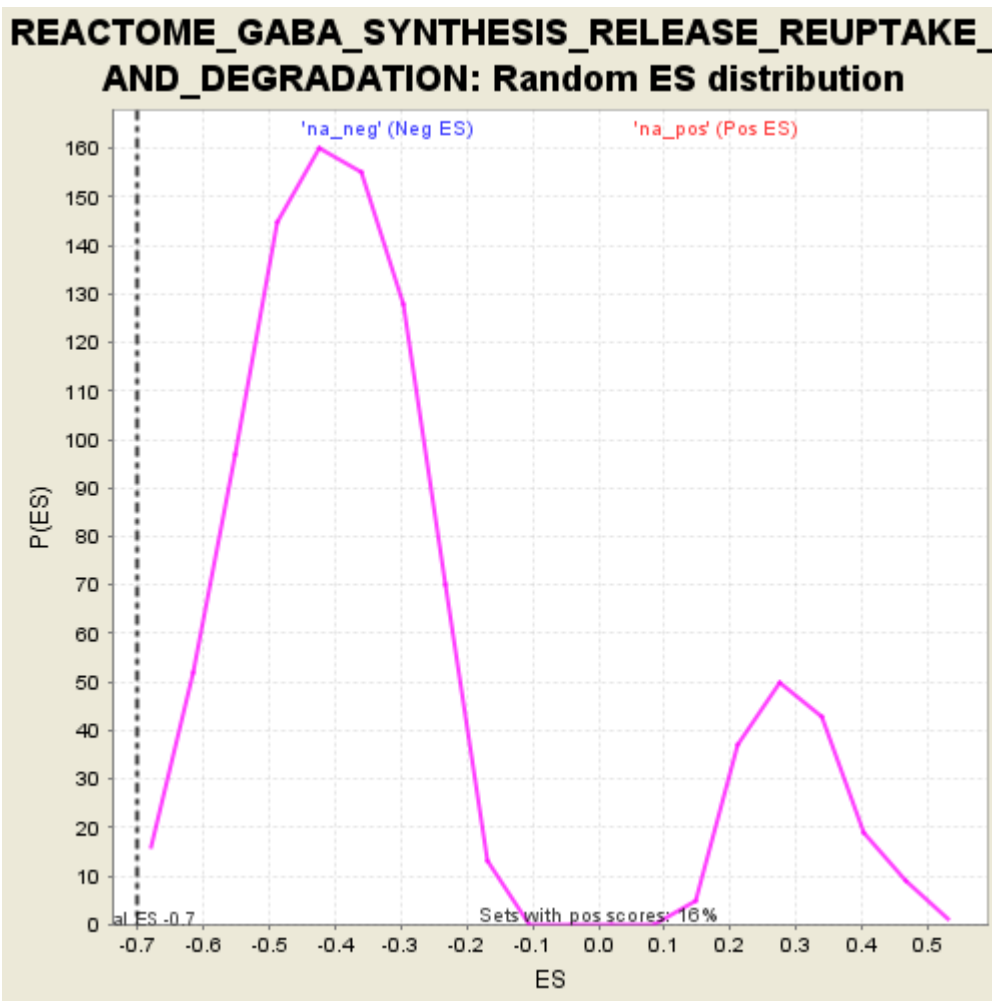

**Fig 2: REACTOME\_GABA\_SYNTHESIS\_RELEASE\_REUPTAKE\_AND\_DEGRADATION:  
Random ES distribution  
Gene set null distribution of ES for  
REACTOME\_GABA\_SYNTHESIS\_RELEASE\_REUPTAKE\_AND\_DEGRADATION**

**Table: GSEA Results Summary**

|                                   |                                         |
|-----------------------------------|-----------------------------------------|
| Dataset                           | GSEA_18M_collapsed                      |
| Phenotype                         | NoPhenotypeAvailable                    |
| Upregulated in class              | na_neg                                  |
| GeneSet                           | REACTOME_NEUROTRANSMITTER_RELEASE_CYCLE |
| Enrichment Score (ES)             | -0.6173815                              |
| Normalized Enrichment Score (NES) | -1.6624899                              |
| Nominal p-value                   | 0.0044247787                            |
| FDR q-value                       | 0.120829426                             |
| FWER p-Value                      | 0.513                                   |

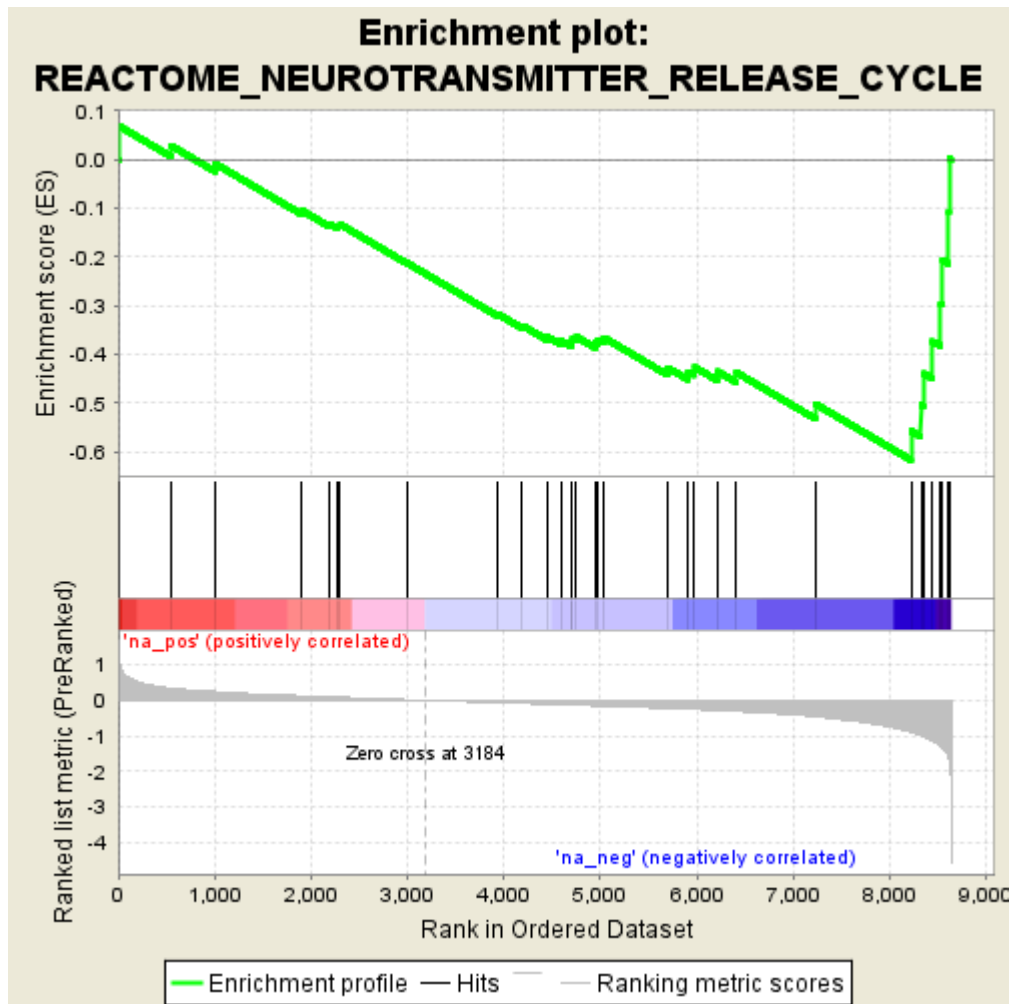

**Fig 1: Enrichment plot: REACTOME\_NEUROTRANSMITTER\_RELEASE\_CYCLE Profile of the Running ES Score & Positions of GeneSet Members on the Rank Ordered List**

**Table: GSEA details [\[plain text format\]](#)**

| PROBE | GENE | GENE_TITLE | RANK | RANK | RUNNING | CORE |
|-------|------|------------|------|------|---------|------|
|-------|------|------------|------|------|---------|------|

|    |                         | SYMBOL                                                        |                                                                                   | IN GENE LIST | METRIC SCORE | ES      | ENRICHMENT |
|----|-------------------------|---------------------------------------------------------------|-----------------------------------------------------------------------------------|--------------|--------------|---------|------------|
| 1  | <a href="#">SLC6A1</a>  | SLC6A1<br><a href="#">Entrez</a> ,<br><a href="#">Source</a>  | solute carrier family 6 (neurotransmitter transporter, GABA), member 1            | 13           | 1.049        | 0.0682  | No         |
| 2  | <a href="#">UNC13B</a>  | UNC13B<br><a href="#">Entrez</a> ,<br><a href="#">Source</a>  | unc-13 homolog B (C. elegans)                                                     | 548          | 0.335        | 0.0284  | No         |
| 3  | <a href="#">CHAT</a>    | CHAT<br><a href="#">Entrez</a> ,<br><a href="#">Source</a>    | choline acetyltransferase                                                         | 1005         | 0.242        | -0.0085 | No         |
| 4  | <a href="#">HSPA8</a>   | HSPA8<br><a href="#">Entrez</a> ,<br><a href="#">Source</a>   | heat shock 70kDa protein 8                                                        | 1905         | 0.122        | -0.1049 | No         |
| 5  | <a href="#">SLC22A2</a> | SLC22A2<br><a href="#">Entrez</a> ,<br><a href="#">Source</a> | solute carrier family 22 (organic cation transporter), member 2                   | 2195         | 0.094        | -0.1322 | No         |
| 6  | <a href="#">GLS</a>     | GLS<br><a href="#">Entrez</a> ,<br><a href="#">Source</a>     | glutaminase                                                                       | 2277         | 0.085        | -0.1360 | No         |
| 7  | <a href="#">GLS2</a>    | GLS2<br><a href="#">Entrez</a> ,<br><a href="#">Source</a>    | glutaminase 2 (liver, mitochondrial)                                              | 2302         | 0.083        | -0.1333 | No         |
| 8  | <a href="#">SYN3</a>    | SYN3<br><a href="#">Entrez</a> ,<br><a href="#">Source</a>    | synapsin III                                                                      | 2990         | 0.016        | -0.2120 | No         |
| 9  | <a href="#">SLC5A7</a>  | SLC5A7<br><a href="#">Entrez</a> ,<br><a href="#">Source</a>  | solute carrier family 5 (choline transporter), member 7                           | 3940         | -0.064       | -0.3180 | No         |
| 10 | <a href="#">SLC18A3</a> | SLC18A3<br><a href="#">Entrez</a> ,<br><a href="#">Source</a> | solute carrier family 18 (vesicular acetylcholine), member 3                      | 4190         | -0.087       | -0.3412 | No         |
| 11 | <a href="#">STX1A</a>   | STX1A<br><a href="#">Entrez</a> ,<br><a href="#">Source</a>   | syntaxin 1A (brain)                                                               | 4451         | -0.109       | -0.3641 | No         |
| 12 | <a href="#">SYN2</a>    | SYN2<br><a href="#">Entrez</a> ,<br><a href="#">Source</a>    | synapsin II                                                                       | 4593         | -0.120       | -0.3726 | No         |
| 13 | <a href="#">SLC38A2</a> | SLC38A2<br><a href="#">Entrez</a> ,<br><a href="#">Source</a> | solute carrier family 38, member 2                                                | 4698         | -0.129       | -0.3760 | No         |
| 14 | <a href="#">SLC6A11</a> | SLC6A11<br><a href="#">Entrez</a> ,<br><a href="#">Source</a> | solute carrier family 6 (neurotransmitter transporter, GABA), member 11           | 4708         | -0.130       | -0.3684 | No         |
| 15 | <a href="#">ALDH5A1</a> | ALDH5A1<br><a href="#">Entrez</a> ,<br><a href="#">Source</a> | aldehyde dehydrogenase 5 family, member A1 (succinate-semialdehyde dehydrogenase) | 4750         | -0.134       | -0.3643 | No         |
| 16 | <a href="#">RIMS1</a>   | RIMS1<br><a href="#">Entrez</a> ,<br><a href="#">Source</a>   | regulating synaptic membrane exocytosis 1                                         | 4945         | -0.153       | -0.3766 | No         |



|    |                         |                                                                               |                                                                                                         |      |        |         |     |
|----|-------------------------|-------------------------------------------------------------------------------|---------------------------------------------------------------------------------------------------------|------|--------|---------|-----|
| 17 | <a href="#">SLC17A7</a> | <a href="#">SLC17A7</a><br><a href="#">Entrez</a> ,<br><a href="#">Source</a> | solute carrier family 17 (sodium-dependent inorganic phosphate cotransporter), member 7                 | 4973 | -0.156 | -0.3694 | No  |
| 18 | <a href="#">SLC32A1</a> | <a href="#">SLC32A1</a><br><a href="#">Entrez</a> ,<br><a href="#">Source</a> | solute carrier family 32 (GABA vesicular transporter), member 1                                         | 5034 | -0.160 | -0.3658 | No  |
| 19 | <a href="#">SLC1A6</a>  | <a href="#">SLC1A6</a><br><a href="#">Entrez</a> ,<br><a href="#">Source</a>  | solute carrier family 1 (high affinity aspartate/glutamate transporter), member 6                       | 5697 | -0.224 | -0.4278 | No  |
| 20 | <a href="#">ABAT</a>    | <a href="#">ABAT</a><br><a href="#">Entrez</a> ,<br><a href="#">Source</a>    | 4-aminobutyrate aminotransferase                                                                        | 5908 | -0.247 | -0.4358 | No  |
| 21 | <a href="#">SLC6A12</a> | <a href="#">SLC6A12</a><br><a href="#">Entrez</a> ,<br><a href="#">Source</a> | solute carrier family 6 (neurotransmitter transporter, betaine/GABA), member 12                         | 5976 | -0.256 | -0.4265 | No  |
| 22 | <a href="#">SYN1</a>    | <a href="#">SYN1</a><br><a href="#">Entrez</a> ,<br><a href="#">Source</a>    | synapsin I                                                                                              | 6211 | -0.281 | -0.4350 | No  |
| 23 | <a href="#">SNAP25</a>  | <a href="#">SNAP25</a><br><a href="#">Entrez</a> ,<br><a href="#">Source</a>  | synaptosomal-associated protein, 25kDa                                                                  | 6408 | -0.306 | -0.4375 | No  |
| 24 | <a href="#">MAOA</a>    | <a href="#">MAOA</a><br><a href="#">Entrez</a> ,<br><a href="#">Source</a>    | monoamine oxidase A                                                                                     | 7228 | -0.458 | -0.5022 | No  |
| 25 | <a href="#">GAD2</a>    | <a href="#">GAD2</a><br><a href="#">Entrez</a> ,<br><a href="#">Source</a>    | glutamate decarboxylase 2 (pancreatic islets and brain, 65kDa)                                          | 8220 | -0.898 | -0.5577 | Yes |
| 26 | <a href="#">SLC18A2</a> | <a href="#">SLC18A2</a><br><a href="#">Entrez</a> ,<br><a href="#">Source</a> | solute carrier family 18 (vesicular monoamine), member 2                                                | 8322 | -0.988 | -0.5038 | Yes |
| 27 | <a href="#">SLC1A1</a>  | <a href="#">SLC1A1</a><br><a href="#">Entrez</a> ,<br><a href="#">Source</a>  | solute carrier family 1 (neuronal/epithelial high affinity glutamate transporter, system Xag), member 1 | 8349 | -1.019 | -0.4391 | Yes |
| 28 | <a href="#">GAD1</a>    | <a href="#">GAD1</a><br><a href="#">Entrez</a> ,<br><a href="#">Source</a>    | glutamate decarboxylase 1 (brain, 67kDa)                                                                | 8441 | -1.150 | -0.3733 | Yes |
| 29 | <a href="#">VAMP2</a>   | <a href="#">VAMP2</a><br><a href="#">Entrez</a> ,<br><a href="#">Source</a>   | vesicle-associated membrane protein 2 (synaptobrevin 2)                                                 | 8526 | -1.314 | -0.2957 | Yes |
| 30 | <a href="#">DNAJC5</a>  | <a href="#">DNAJC5</a><br><a href="#">Entrez</a> ,<br><a href="#">Source</a>  | DnaJ (Hsp40) homolog, subfamily C, member 5                                                             | 8545 | -1.363 | -0.2072 | Yes |
| 31 | <a href="#">STXBP1</a>  | <a href="#">STXBP1</a><br><a href="#">Entrez</a> ,<br><a href="#">Source</a>  | syntaxin binding protein 1                                                                              | 8609 | -1.599 | -0.1083 | Yes |
| 32 | <a href="#">SYT1</a>    | <a href="#">SYT1</a><br><a href="#">Entrez</a> ,<br><a href="#">Source</a>    | synaptotagmin I                                                                                         | 8615 | -1.677 | 0.0026  | Yes |

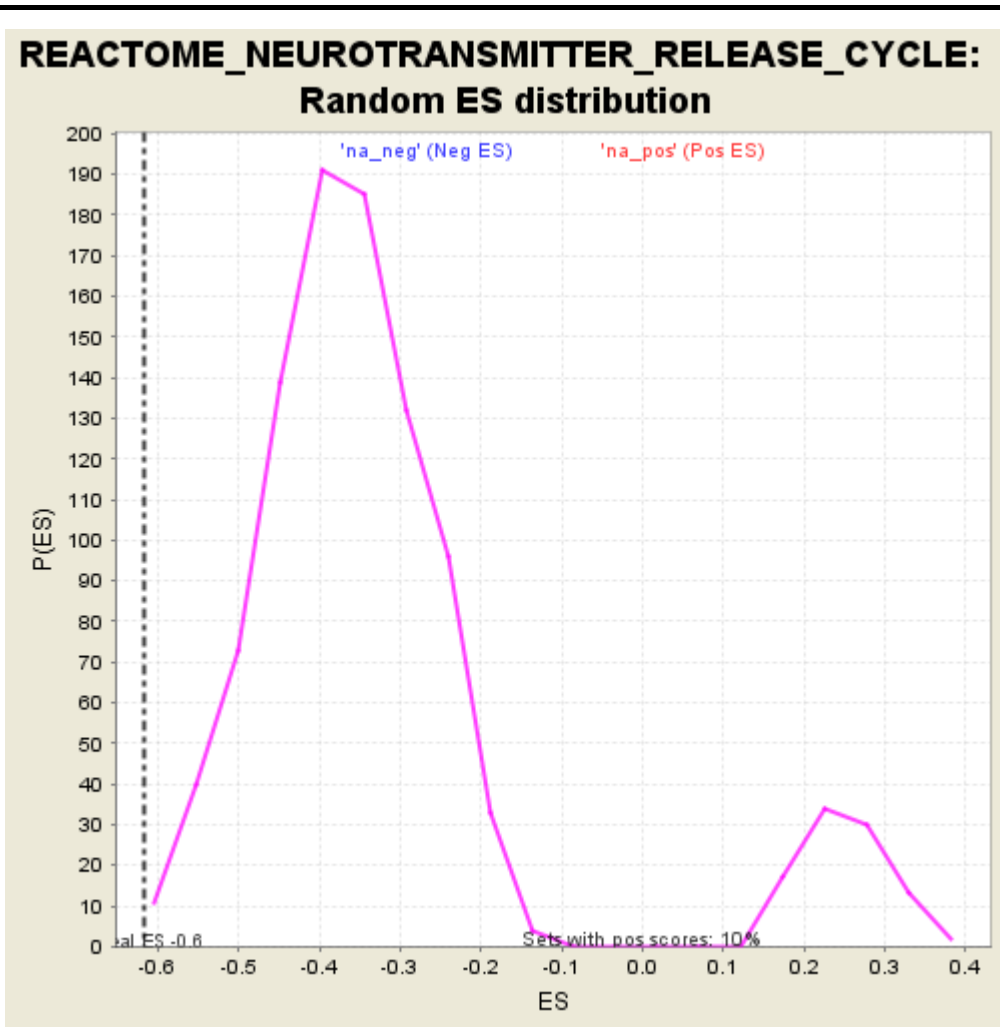

**Fig 2: REACTOME\_NEUROTRANSMITTER\_RELEASE\_CYCLE: Random ES distribution**

**Gene set null distribution of ES for REACTOME\_NEUROTRANSMITTER\_RELEASE\_CYCLE**

**Table: GSEA Results Summary**

|                                   |                                             |
|-----------------------------------|---------------------------------------------|
| Dataset                           | GSEA_18M_collapsed                          |
| Phenotype                         | NoPhenotypeAvailable                        |
| Upregulated in class              | na_neg                                      |
| GeneSet                           | REACTOME_LIGAND_GATED_ION_CHANNEL_TRANSPORT |
| Enrichment Score (ES)             | -0.6861634                                  |
| Normalized Enrichment Score (NES) | -1.6194682                                  |
| Nominal p-value                   | 0.008293839                                 |
| FDR q-value                       | 0.19161622                                  |
| FWER p-Value                      | 0.731                                       |

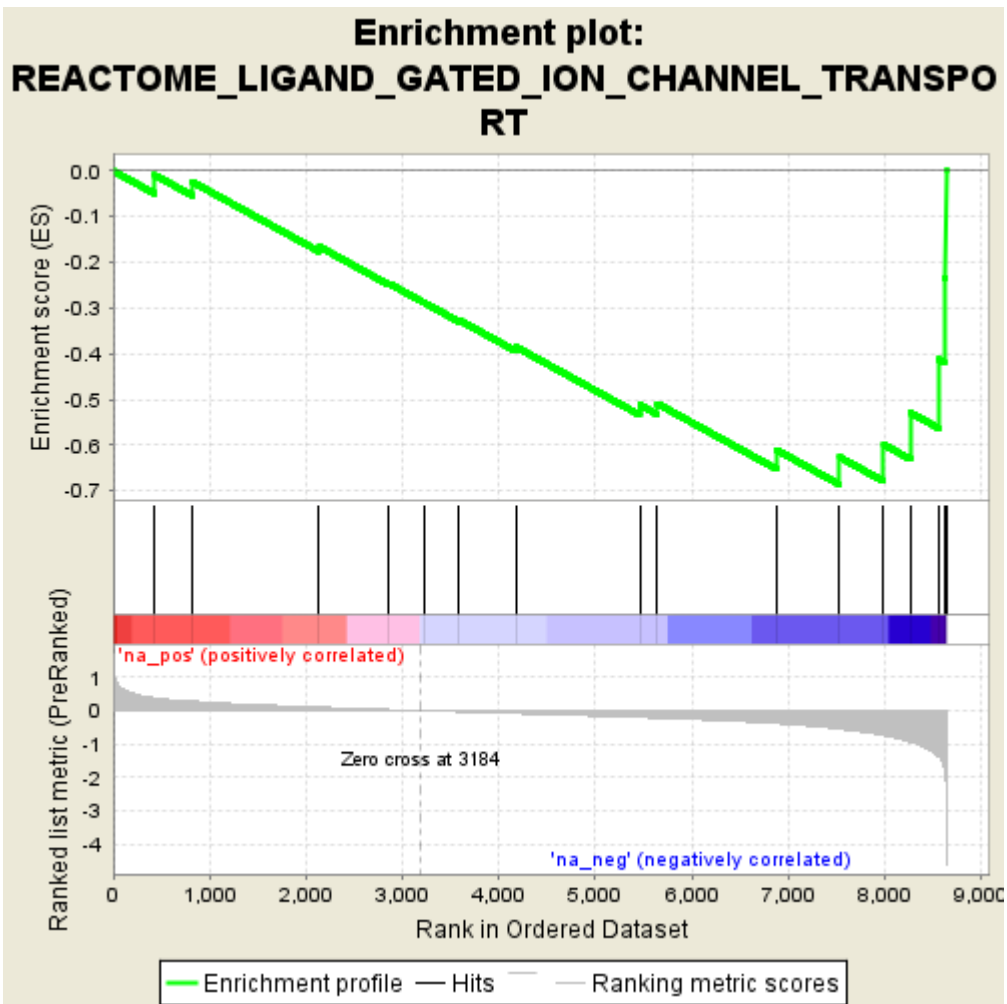

**Fig 1: Enrichment plot: REACTOME\_LIGAND\_GATED\_ION\_CHANNEL\_TRANSPORT**  
**Profile of the Running ES Score & Positions of GeneSet Members on the Rank Ordered List**

**Table: GSEA details [\[plain text format\]](#)**

| PROBE | GENE | GENE_TITLE | RANK | RANK | RUNNING | CORE |
|-------|------|------------|------|------|---------|------|
|-------|------|------------|------|------|---------|------|

|    |                         | SYMBOL                                                        |                                                                               | IN GENE LIST | METRIC SCORE | ES      | ENRICHMENT |
|----|-------------------------|---------------------------------------------------------------|-------------------------------------------------------------------------------|--------------|--------------|---------|------------|
| 1  | <a href="#">GABRG3</a>  | GABRG3<br><a href="#">Entrez</a> ,<br><a href="#">Source</a>  | gamma-aminobutyric acid (GABA) A receptor, gamma 3                            | 429          | 0.375        | -0.0089 | No         |
| 2  | <a href="#">GLRA2</a>   | GLRA2<br><a href="#">Entrez</a> ,<br><a href="#">Source</a>   | glycine receptor, alpha 2                                                     | 822          | 0.277        | -0.0242 | No         |
| 3  | <a href="#">GABRB1</a>  | GABRB1<br><a href="#">Entrez</a> ,<br><a href="#">Source</a>  | gamma-aminobutyric acid (GABA) A receptor, beta 1                             | 2136         | 0.100        | -0.1656 | No         |
| 4  | <a href="#">GLRA3</a>   | GLRA3<br><a href="#">Entrez</a> ,<br><a href="#">Source</a>   | glycine receptor, alpha 3                                                     | 2859         | 0.028        | -0.2463 | No         |
| 5  | <a href="#">GABRA3</a>  | GABRA3<br><a href="#">Entrez</a> ,<br><a href="#">Source</a>  | gamma-aminobutyric acid (GABA) A receptor, alpha 3                            | 3222         | -0.003       | -0.2879 | No         |
| 6  | <a href="#">GLRA1</a>   | GLRA1<br><a href="#">Entrez</a> ,<br><a href="#">Source</a>   | glycine receptor, alpha 1 (startle disease/hyperekplexia, stiff man syndrome) | 3587         | -0.036       | -0.3263 | No         |
| 7  | <a href="#">GABRR2</a>  | GABRR2<br><a href="#">Entrez</a> ,<br><a href="#">Source</a>  | gamma-aminobutyric acid (GABA) receptor, rho 2                                | 4177         | -0.086       | -0.3852 | No         |
| 8  | <a href="#">GABRA5</a>  | GABRA5<br><a href="#">Entrez</a> ,<br><a href="#">Source</a>  | gamma-aminobutyric acid (GABA) A receptor, alpha 5                            | 5460         | -0.201       | -0.5120 | No         |
| 9  | <a href="#">GABRA4</a>  | GABRA4<br><a href="#">Entrez</a> ,<br><a href="#">Source</a>  | gamma-aminobutyric acid (GABA) A receptor, alpha 4                            | 5639         | -0.218       | -0.5088 | No         |
| 10 | <a href="#">ARHGEF9</a> | ARHGEF9<br><a href="#">Entrez</a> ,<br><a href="#">Source</a> | Cdc42 guanine nucleotide exchange factor (GEF) 9                              | 6877         | -0.384       | -0.6104 | No         |
| 11 | <a href="#">GABRA2</a>  | GABRA2<br><a href="#">Entrez</a> ,<br><a href="#">Source</a>  | gamma-aminobutyric acid (GABA) A receptor, alpha 2                            | 7531         | -0.550       | -0.6262 | Yes        |
| 12 | <a href="#">GABRA6</a>  | GABRA6<br><a href="#">Entrez</a> ,<br><a href="#">Source</a>  | gamma-aminobutyric acid (GABA) A receptor, alpha 6                            | 7988         | -0.737       | -0.5987 | Yes        |
| 13 | <a href="#">GABRG2</a>  | GABRG2<br><a href="#">Entrez</a> ,<br><a href="#">Source</a>  | gamma-aminobutyric acid (GABA) A receptor, gamma 2                            | 8267         | -0.934       | -0.5291 | Yes        |
| 14 | <a href="#">GABRA1</a>  | GABRA1<br><a href="#">Entrez</a> ,<br><a href="#">Source</a>  | gamma-aminobutyric acid (GABA) A receptor, alpha 1                            | 8559         | -1.387       | -0.4117 | Yes        |
| 15 | <a href="#">GABRB3</a>  | GABRB3<br><a href="#">Entrez</a> ,<br><a href="#">Source</a>  | gamma-aminobutyric acid (GABA) A receptor, beta 3                             | 8619         | -1.698       | -0.2335 | Yes        |

|    |                        |                                          |                                                   |      |        |        |     |
|----|------------------------|------------------------------------------|---------------------------------------------------|------|--------|--------|-----|
| 16 | <a href="#">GABRB2</a> | GABRB2<br><a href="#">Entrez, Source</a> | gamma-aminobutyric acid (GABA) A receptor, beta 2 | 8633 | -2.160 | 0.0005 | Yes |
|----|------------------------|------------------------------------------|---------------------------------------------------|------|--------|--------|-----|

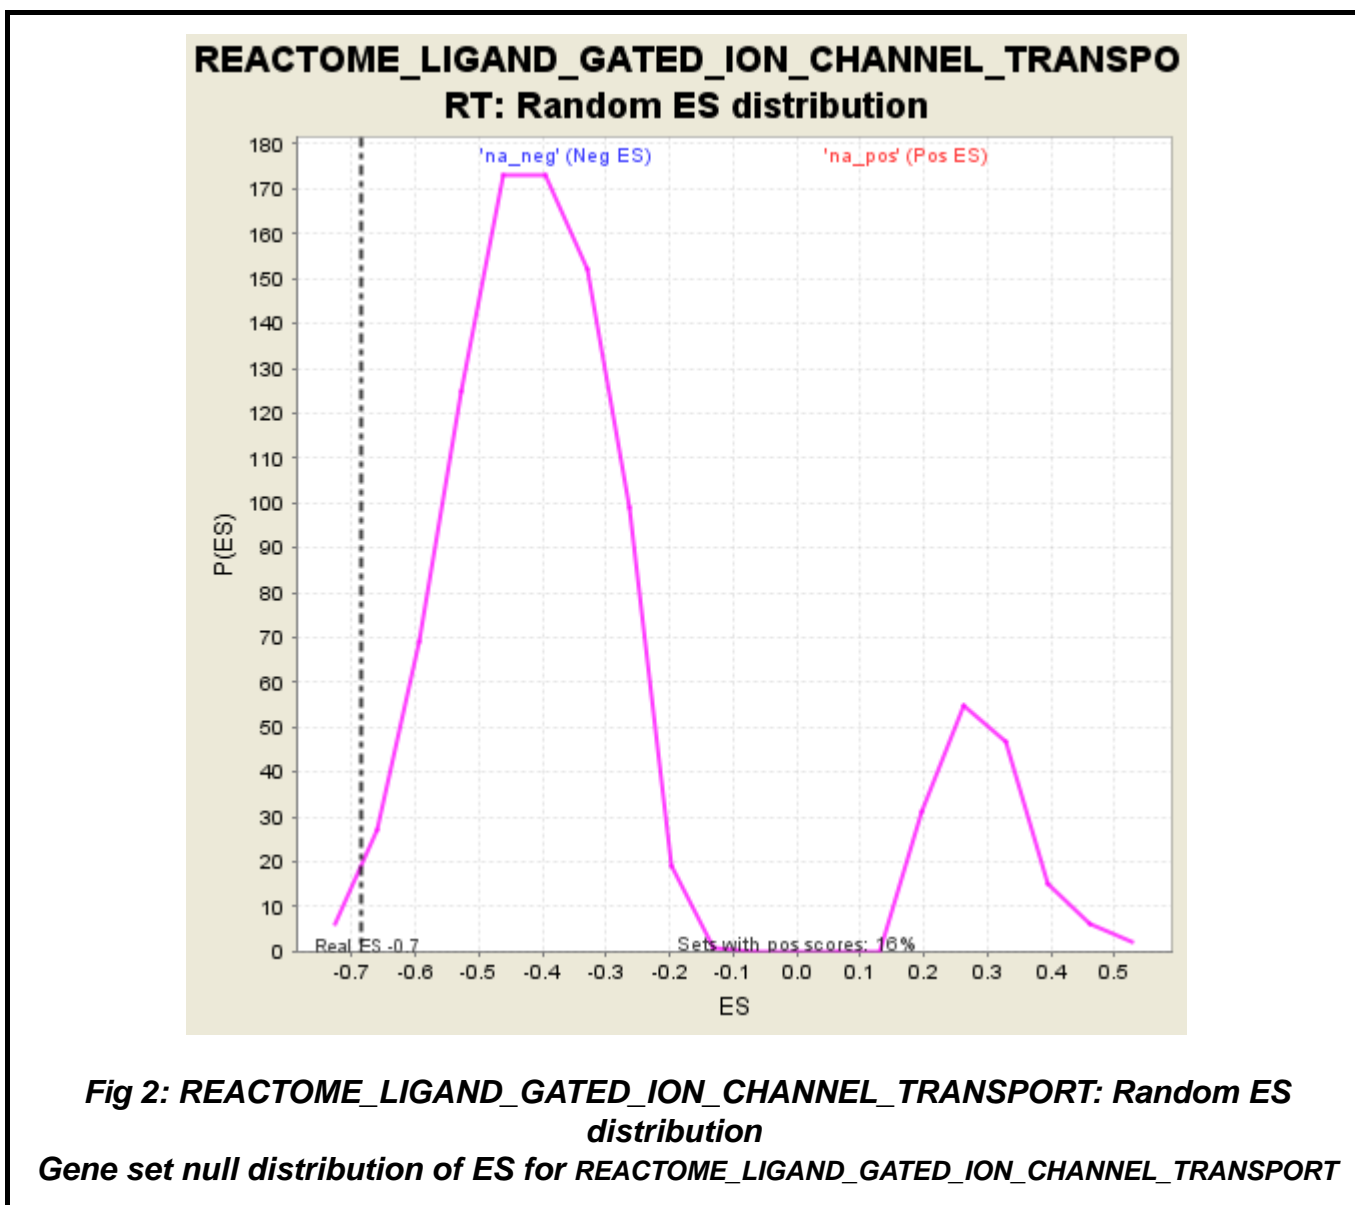

**Table: GSEA Results Summary**

|                                   |                                      |
|-----------------------------------|--------------------------------------|
| Dataset                           | GSEA_18M_collapsed                   |
| Phenotype                         | NoPhenotypeAvailable                 |
| Upregulated in class              | na_neg                               |
| GeneSet                           | REACTOME_LYSOSOME_VESICLE_BIOGENESIS |
| Enrichment Score (ES)             | -0.6641736                           |
| Normalized Enrichment Score (NES) | -1.6016495                           |
| Nominal p-value                   | 0.010575793                          |
| FDR q-value                       | 0.20676766                           |
| FWER p-Value                      | 0.802                                |

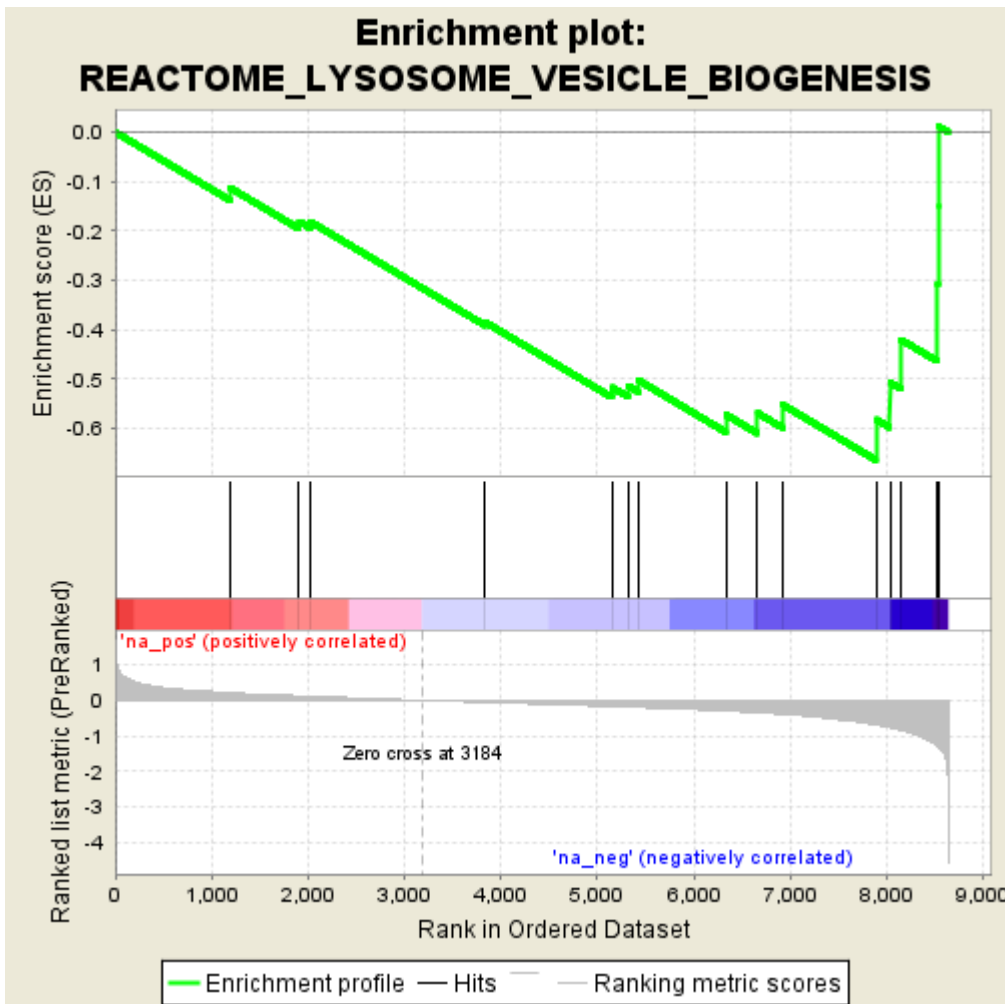

**Fig 1: Enrichment plot: REACTOME\_LYSOSOME\_VESICLE\_BIOGENESIS**  
**Profile of the Running ES Score & Positions of GeneSet Members on the Rank Ordered List**

**Table: GSEA details [\[plain text format\]](#)**

| PROBE | GENE | GENE_TITLE | RANK IN | RANK | RUNNING | CORE |
|-------|------|------------|---------|------|---------|------|
|-------|------|------------|---------|------|---------|------|

|    |                         | SYMBOL                                                        |                                                                | GENE LIST | METRIC SCORE | ES      | ENRICHMENT |
|----|-------------------------|---------------------------------------------------------------|----------------------------------------------------------------|-----------|--------------|---------|------------|
| 1  | <a href="#">CLTC</a>    | CLTC<br><a href="#">Entrez</a> ,<br><a href="#">Source</a>    | clathrin, heavy chain (Hc)                                     | 1194      | 0.211        | -0.1133 | No         |
| 2  | <a href="#">HSPA8</a>   | HSPA8<br><a href="#">Entrez</a> ,<br><a href="#">Source</a>   | heat shock 70kDa protein 8                                     | 1905      | 0.122        | -0.1810 | No         |
| 3  | <a href="#">CLTA</a>    | CLTA<br><a href="#">Entrez</a> ,<br><a href="#">Source</a>    | clathrin, light chain (Lca)                                    | 2024      | 0.110        | -0.1816 | No         |
| 4  | <a href="#">AP1S2</a>   | AP1S2<br><a href="#">Entrez</a> ,<br><a href="#">Source</a>   | adaptor-related protein complex 1, sigma 2 subunit             | 3836      | -0.056       | -0.3850 | No         |
| 5  | <a href="#">AP1S1</a>   | AP1S1<br><a href="#">Entrez</a> ,<br><a href="#">Source</a>   | adaptor-related protein complex 1, sigma 1 subunit             | 5150      | -0.171       | -0.5168 | No         |
| 6  | <a href="#">BLOC1S1</a> | BLOC1S1<br><a href="#">Entrez</a> ,<br><a href="#">Source</a> | biogenesis of lysosome-related organelles complex-1, subunit 1 | 5317      | -0.186       | -0.5139 | No         |
| 7  | <a href="#">CTSZ</a>    | CTSZ<br><a href="#">Entrez</a> ,<br><a href="#">Source</a>    | cathepsin Z                                                    | 5423      | -0.197       | -0.5025 | No         |
| 8  | <a href="#">DNM2</a>    | DNM2<br><a href="#">Entrez</a> ,<br><a href="#">Source</a>    | dynamamin 2                                                    | 6331      | -0.296       | -0.5723 | No         |
| 9  | <a href="#">VAMP8</a>   | VAMP8<br><a href="#">Entrez</a> ,<br><a href="#">Source</a>   | vesicle-associated membrane protein 8 (endobrevin)             | 6661      | -0.346       | -0.5691 | No         |
| 10 | <a href="#">AP1G1</a>   | AP1G1<br><a href="#">Entrez</a> ,<br><a href="#">Source</a>   | adaptor-related protein complex 1, gamma 1 subunit             | 6920      | -0.393       | -0.5521 | No         |
| 11 | <a href="#">ARF1</a>    | ARF1<br><a href="#">Entrez</a> ,<br><a href="#">Source</a>    | ADP-ribosylation factor 1                                      | 7887      | -0.689       | -0.5819 | Yes        |
| 12 | <a href="#">M6PR</a>    | M6PR<br><a href="#">Entrez</a> ,<br><a href="#">Source</a>    | mannose-6-phosphate receptor (cation dependent)                | 8031      | -0.768       | -0.5067 | Yes        |
| 13 | <a href="#">TXNDC5</a>  | TXNDC5<br><a href="#">Entrez</a> ,<br><a href="#">Source</a>  | thioredoxin domain containing 5                                | 8147      | -0.834       | -0.4204 | Yes        |
| 14 | <a href="#">VAMP2</a>   | VAMP2<br><a href="#">Entrez</a> ,<br><a href="#">Source</a>   | vesicle-associated membrane protein 2 (synaptobrevin 2)        | 8526      | -1.314       | -0.3072 | Yes        |
| 15 | <a href="#">SH3GL2</a>  | SH3GL2<br><a href="#">Entrez</a> ,<br><a href="#">Source</a>  | SH3-domain GRB2-like 2                                         | 8533      | -1.335       | -0.1484 | Yes        |
| 16 | <a href="#">DNAJC6</a>  | DNAJC6<br><a href="#">Entrez</a> ,<br><a href="#">Source</a>  | DnaJ (Hsp40) homolog, subfamily C, member 6                    | 8536      | -1.342       | 0.0117  | Yes        |

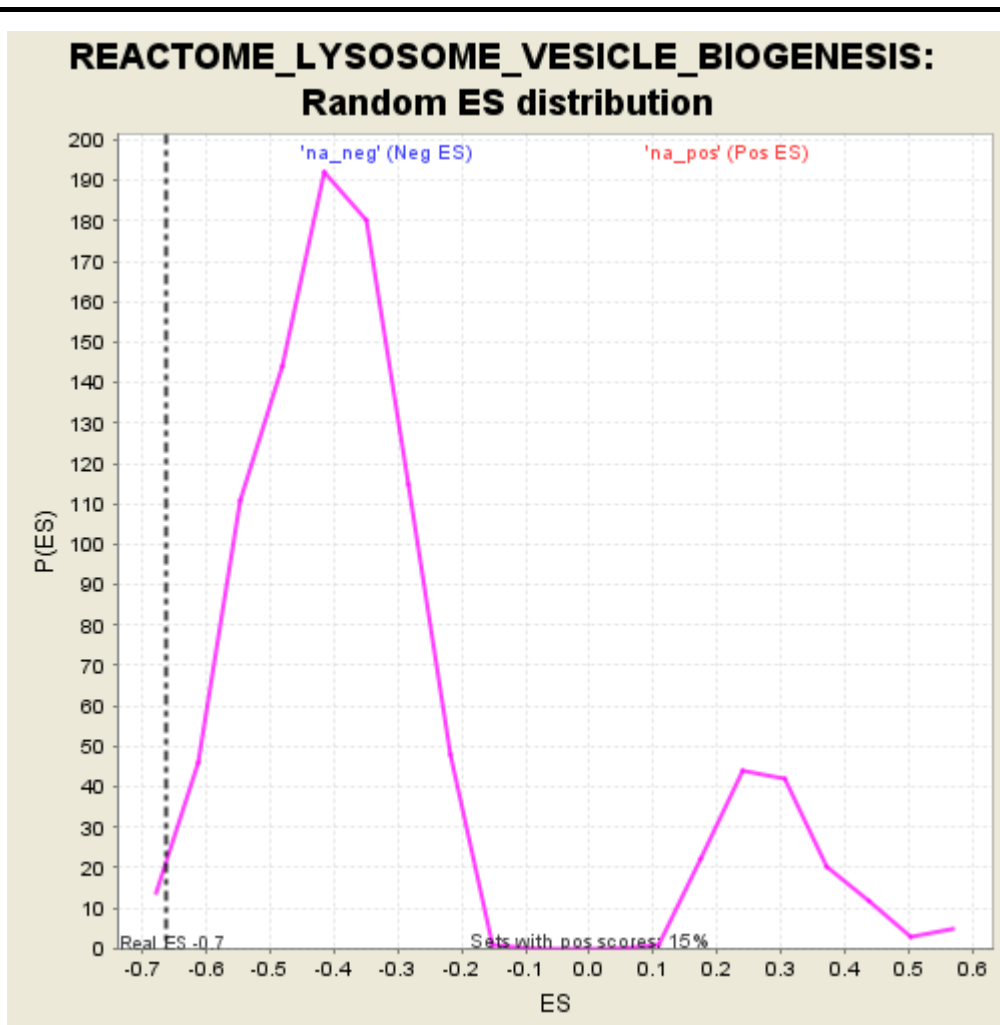

**Fig 2: REACTOME\_LYSOSOME\_VESICLE\_BIOGENESIS: Random ES distribution**  
**Gene set null distribution of ES for REACTOME\_LYSOSOME\_VESICLE\_BIOGENESIS**



**Table: GSEA Results Summary**

|                                   |                           |
|-----------------------------------|---------------------------|
| Dataset                           | GSEA_18M_collapsed        |
| Phenotype                         | NoPhenotypeAvailable      |
| Upregulated in class              | na_neg                    |
| GeneSet                           | REACTOME_SIGNALING_BY_ILS |
| Enrichment Score (ES)             | -0.53783953               |
| Normalized Enrichment Score (NES) | -1.583865                 |
| Nominal p-value                   | 0.0010235414              |
| FDR q-value                       | 0.23137298                |
| FWER p-Value                      | 0.865                     |

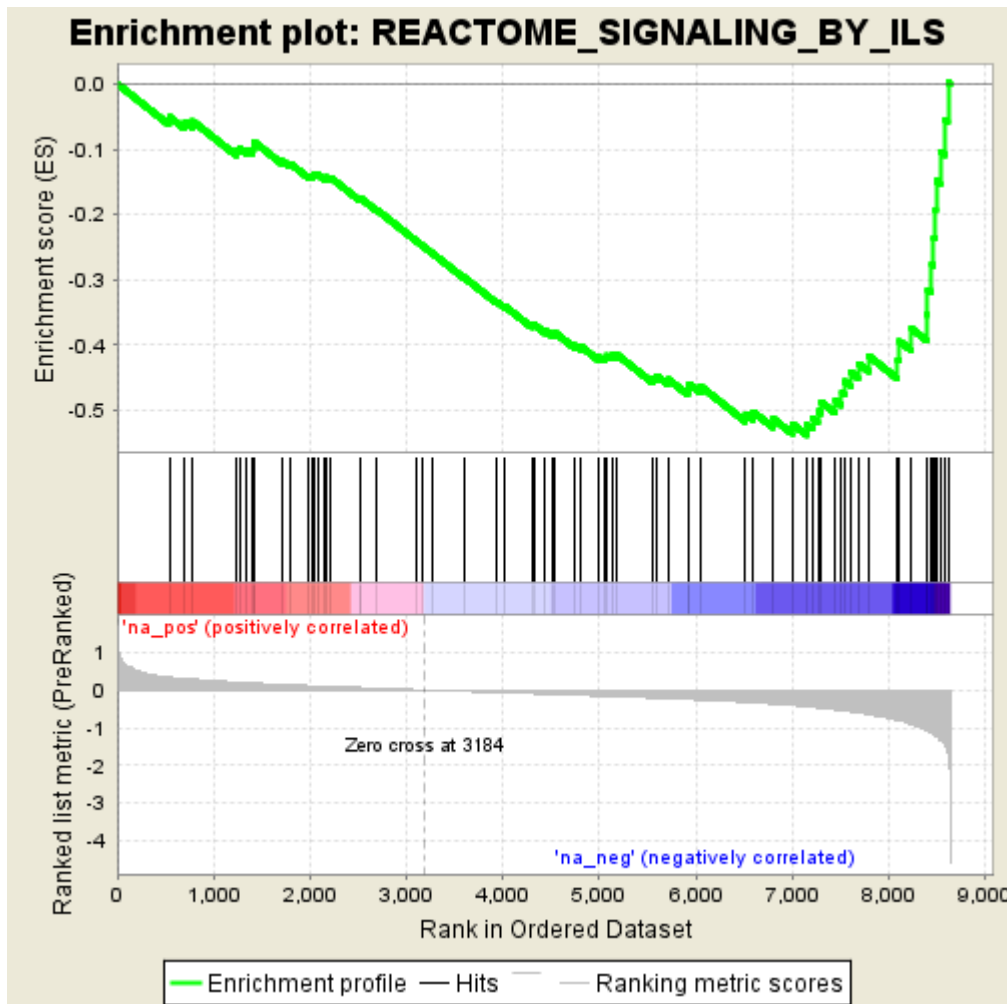

**Fig 1: Enrichment plot: REACTOME\_SIGNALING\_BY\_ILS**  
 Profile of the Running ES Score & Positions of GeneSet Members on the Rank Ordered List

**Table: GSEA details [\[plain text format\]](#)**

| PROBE | GENE | GENE_TITLE | RANK | RANK | RUNNING | CORE |
|-------|------|------------|------|------|---------|------|
|-------|------|------------|------|------|---------|------|

|    |                        | SYMBOL                                                       |                                                                                          | IN GENE LIST | METRIC SCORE | ES      | ENRICHMENT |
|----|------------------------|--------------------------------------------------------------|------------------------------------------------------------------------------------------|--------------|--------------|---------|------------|
| 1  | <a href="#">CHUK</a>   | CHUK<br><a href="#">Entrez</a> ,<br><a href="#">Source</a>   | conserved helix-loop-helix ubiquitous kinase                                             | 539          | 0.337        | -0.0504 | No         |
| 2  | <a href="#">GAB2</a>   | GAB2<br><a href="#">Entrez</a> ,<br><a href="#">Source</a>   | GRB2-associated binding protein 2                                                        | 702          | 0.297        | -0.0584 | No         |
| 3  | <a href="#">MAP3K8</a> | MAP3K8<br><a href="#">Entrez</a> ,<br><a href="#">Source</a> | mitogen-activated protein kinase kinase kinase 8                                         | 781          | 0.285        | -0.0570 | No         |
| 4  | <a href="#">YWHAZ</a>  | YWHAZ<br><a href="#">Entrez</a> ,<br><a href="#">Source</a>  | tyrosine 3-monooxygenase/tryptophan 5-monooxygenase activation protein, zeta polypeptide | 1235         | 0.204        | -0.1023 | No         |
| 5  | <a href="#">PIK3CD</a> | PIK3CD<br><a href="#">Entrez</a> ,<br><a href="#">Source</a> | phosphoinositide-3-kinase, catalytic, delta polypeptide                                  | 1265         | 0.200        | -0.0983 | No         |
| 6  | <a href="#">IL2RB</a>  | IL2RB<br><a href="#">Entrez</a> ,<br><a href="#">Source</a>  | interleukin 2 receptor, beta                                                             | 1344         | 0.188        | -0.1005 | No         |
| 7  | <a href="#">IKBKB</a>  | IKBKB<br><a href="#">Entrez</a> ,<br><a href="#">Source</a>  | inhibitor of kappa light polypeptide gene enhancer in B-cells, kinase beta               | 1403         | 0.181        | -0.1006 | No         |
| 8  | <a href="#">PTPN6</a>  | PTPN6<br><a href="#">Entrez</a> ,<br><a href="#">Source</a>  | protein tyrosine phosphatase, non-receptor type 6                                        | 1412         | 0.180        | -0.0948 | No         |
| 9  | <a href="#">NFKB2</a>  | NFKB2<br><a href="#">Entrez</a> ,<br><a href="#">Source</a>  | nuclear factor of kappa light polypeptide gene enhancer in B-cells 2 (p49/p100)          | 1416         | 0.180        | -0.0885 | No         |
| 10 | <a href="#">IL18</a>   | IL18<br><a href="#">Entrez</a> ,<br><a href="#">Source</a>   | interleukin 18 (interferon-gamma-inducing factor)                                        | 1714         | 0.145        | -0.1178 | No         |
| 11 | <a href="#">RAF1</a>   | RAF1<br><a href="#">Entrez</a> ,<br><a href="#">Source</a>   | v-raf-1 murine leukemia viral oncogene homolog 1                                         | 1794         | 0.134        | -0.1221 | No         |
| 12 | <a href="#">PIK3R2</a> | PIK3R2<br><a href="#">Entrez</a> ,<br><a href="#">Source</a> | phosphoinositide-3-kinase, regulatory subunit 2 (p85 beta)                               | 1989         | 0.114        | -0.1405 | No         |
| 13 | <a href="#">IRAK3</a>  | IRAK3<br><a href="#">Entrez</a> ,<br><a href="#">Source</a>  | interleukin-1 receptor-associated kinase 3                                               | 2027         | 0.109        | -0.1408 | No         |
| 14 | <a href="#">RBX1</a>   | RBX1<br><a href="#">Entrez</a> ,<br><a href="#">Source</a>   | ring-box 1                                                                               | 2043         | 0.108        | -0.1386 | No         |
| 15 | <a href="#">IRAK1</a>  | IRAK1<br><a href="#">Entrez</a> ,<br><a href="#">Source</a>  | interleukin-1 receptor-associated kinase 1                                               | 2078         | 0.104        | -0.1387 | No         |

|    |                        |                                                              |                                                                                                                                         |      |        |         |    |
|----|------------------------|--------------------------------------------------------------|-----------------------------------------------------------------------------------------------------------------------------------------|------|--------|---------|----|
| 16 | <a href="#">STAT3</a>  | STAT3<br><a href="#">Entrez</a> ,<br><a href="#">Source</a>  | signal transducer and activator of transcription 3 (acute-phase response factor)                                                        | 2150 | 0.098  | -0.1433 | No |
| 17 | <a href="#">HGF</a>    | HGF<br><a href="#">Entrez</a> ,<br><a href="#">Source</a>    | hepatocyte growth factor (hepapoietin A; scatter factor)                                                                                | 2173 | 0.095  | -0.1424 | No |
| 18 | <a href="#">IL1R1</a>  | IL1R1<br><a href="#">Entrez</a> ,<br><a href="#">Source</a>  | interleukin 1 receptor, type I                                                                                                          | 2214 | 0.092  | -0.1437 | No |
| 19 | <a href="#">CUL1</a>   | CUL1<br><a href="#">Entrez</a> ,<br><a href="#">Source</a>   | cullin 1                                                                                                                                | 2512 | 0.062  | -0.1760 | No |
| 20 | <a href="#">TYK2</a>   | TYK2<br><a href="#">Entrez</a> ,<br><a href="#">Source</a>   | tyrosine kinase 2                                                                                                                       | 2519 | 0.062  | -0.1745 | No |
| 21 | <a href="#">RELA</a>   | RELA<br><a href="#">Entrez</a> ,<br><a href="#">Source</a>   | v-rel reticuloendotheliosis viral oncogene homolog A, nuclear factor of kappa light polypeptide gene enhancer in B-cells 3, p65 (avian) | 2685 | 0.044  | -0.1921 | No |
| 22 | <a href="#">PTK2B</a>  | PTK2B<br><a href="#">Entrez</a> ,<br><a href="#">Source</a>  | PTK2B protein tyrosine kinase 2 beta                                                                                                    | 3106 | 0.006  | -0.2409 | No |
| 23 | <a href="#">CSF2RA</a> | CSF2RA<br><a href="#">Entrez</a> ,<br><a href="#">Source</a> | colony stimulating factor 2 receptor, alpha, low-affinity (granulocyte-macrophage)                                                      | 3166 | 0.001  | -0.2477 | No |
| 24 | <a href="#">INPPL1</a> | INPPL1<br><a href="#">Entrez</a> ,<br><a href="#">Source</a> | inositol polyphosphate phosphatase-like 1                                                                                               | 3265 | -0.008 | -0.2589 | No |
| 25 | <a href="#">YES1</a>   | YES1<br><a href="#">Entrez</a> ,<br><a href="#">Source</a>   | v-yes-1 Yamaguchi sarcoma viral oncogene homolog 1                                                                                      | 3591 | -0.036 | -0.2955 | No |
| 26 | <a href="#">MAP3K3</a> | MAP3K3<br><a href="#">Entrez</a> ,<br><a href="#">Source</a> | mitogen-activated protein kinase kinase kinase 3                                                                                        | 3936 | -0.064 | -0.3333 | No |
| 27 | <a href="#">STAT5B</a> | STAT5B<br><a href="#">Entrez</a> ,<br><a href="#">Source</a> | signal transducer and activator of transcription 5B                                                                                     | 4017 | -0.072 | -0.3400 | No |
| 28 | <a href="#">IL7R</a>   | IL7R<br><a href="#">Entrez</a> ,<br><a href="#">Source</a>   | interleukin 7 receptor                                                                                                                  | 4298 | -0.096 | -0.3691 | No |
| 29 | <a href="#">FYN</a>    | FYN<br><a href="#">Entrez</a> ,<br><a href="#">Source</a>    | FYN oncogene related to SRC, FGR, YES                                                                                                   | 4317 | -0.097 | -0.3676 | No |
| 30 | <a href="#">LYN</a>    | LYN<br><a href="#">Entrez</a> ,<br><a href="#">Source</a>    | v-yes-1 Yamaguchi sarcoma viral related oncogene homolog                                                                                | 4439 | -0.108 | -0.3778 | No |
| 31 | <a href="#">MAPK3</a>  | MAPK3<br><a href="#">Entrez</a> ,<br><a href="#">Source</a>  | mitogen-activated protein kinase 3                                                                                                      | 4509 | -0.114 | -0.3816 | No |

|    |                         |                                                               |                                                                                   |      |        |         |    |
|----|-------------------------|---------------------------------------------------------------|-----------------------------------------------------------------------------------|------|--------|---------|----|
| 32 | <a href="#">SOCS3</a>   | SOCS3<br><a href="#">Entrez</a> ,<br><a href="#">Source</a>   | suppressor of cytokine signaling 3                                                | 4541 | -0.117 | -0.3809 | No |
| 33 | <a href="#">GRB2</a>    | GRB2<br><a href="#">Entrez</a> ,<br><a href="#">Source</a>    | growth factor receptor-bound protein 2                                            | 4744 | -0.134 | -0.3996 | No |
| 34 | <a href="#">NRAS</a>    | NRAS<br><a href="#">Entrez</a> ,<br><a href="#">Source</a>    | neuroblastoma RAS viral (v-ras) oncogene homolog                                  | 4809 | -0.140 | -0.4019 | No |
| 35 | <a href="#">UBE2N</a>   | UBE2N<br><a href="#">Entrez</a> ,<br><a href="#">Source</a>   | ubiquitin-conjugating enzyme E2N (UBC13 homolog, yeast)                           | 4997 | -0.157 | -0.4179 | No |
| 36 | <a href="#">BLNK</a>    | BLNK<br><a href="#">Entrez</a> ,<br><a href="#">Source</a>    | B-cell linker                                                                     | 5054 | -0.162 | -0.4184 | No |
| 37 | <a href="#">SHC1</a>    | SHC1<br><a href="#">Entrez</a> ,<br><a href="#">Source</a>    | SHC (Src homology 2 domain containing) transforming protein 1                     | 5080 | -0.164 | -0.4153 | No |
| 38 | <a href="#">JAK3</a>    | JAK3<br><a href="#">Entrez</a> ,<br><a href="#">Source</a>    | Janus kinase 3 (a protein tyrosine kinase, leukocyte)                             | 5127 | -0.169 | -0.4144 | No |
| 39 | <a href="#">IL1RAP</a>  | IL1RAP<br><a href="#">Entrez</a> ,<br><a href="#">Source</a>  | interleukin 1 receptor accessory protein                                          | 5173 | -0.173 | -0.4133 | No |
| 40 | <a href="#">MAP2K1</a>  | MAP2K1<br><a href="#">Entrez</a> ,<br><a href="#">Source</a>  | mitogen-activated protein kinase kinase 1                                         | 5558 | -0.211 | -0.4503 | No |
| 41 | <a href="#">MAP2K6</a>  | MAP2K6<br><a href="#">Entrez</a> ,<br><a href="#">Source</a>  | mitogen-activated protein kinase kinase 6                                         | 5589 | -0.213 | -0.4459 | No |
| 42 | <a href="#">SQSTM1</a>  | SQSTM1<br><a href="#">Entrez</a> ,<br><a href="#">Source</a>  | sequestosome 1                                                                    | 5710 | -0.225 | -0.4516 | No |
| 43 | <a href="#">LCK</a>     | LCK<br><a href="#">Entrez</a> ,<br><a href="#">Source</a>     | lymphocyte-specific protein tyrosine kinase                                       | 5917 | -0.249 | -0.4665 | No |
| 44 | <a href="#">CASP1</a>   | CASP1<br><a href="#">Entrez</a> ,<br><a href="#">Source</a>   | caspase 1, apoptosis-related cysteine peptidase (interleukin 1, beta, convertase) | 5928 | -0.250 | -0.4584 | No |
| 45 | <a href="#">TNIP2</a>   | TNIP2<br><a href="#">Entrez</a> ,<br><a href="#">Source</a>   | TNFAIP3 interacting protein 2                                                     | 6051 | -0.264 | -0.4629 | No |
| 46 | <a href="#">RAPGEF1</a> | RAPGEF1<br><a href="#">Entrez</a> ,<br><a href="#">Source</a> | Rap guanine nucleotide exchange factor (GEF) 1                                    | 6514 | -0.322 | -0.5049 | No |
| 47 | <a href="#">PIK3CB</a>  | PIK3CB<br><a href="#">Entrez</a> ,<br><a href="#">Source</a>  | phosphoinositide-3-kinase, catalytic, beta polypeptide                            | 6592 | -0.333 | -0.5016 | No |
| 48 | <a href="#">PIK3CA</a>  | PIK3CA<br><a href="#">Entrez</a> ,<br><a href="#">Source</a>  | phosphoinositide-3-kinase, catalytic, alpha polypeptide                           | 6801 | -0.370 | -0.5122 | No |

|    |                        |                                                              |                                                                                          |      |        |         |     |
|----|------------------------|--------------------------------------------------------------|------------------------------------------------------------------------------------------|------|--------|---------|-----|
| 49 | <a href="#">STAT1</a>  | STAT1<br><a href="#">Entrez</a> ,<br><a href="#">Source</a>  | signal transducer and activator of transcription 1, 91kDa                                | 6998 | -0.406 | -0.5201 | No  |
| 50 | <a href="#">HCK</a>    | HCK<br><a href="#">Entrez</a> ,<br><a href="#">Source</a>    | hemopoietic cell kinase                                                                  | 7151 | -0.437 | -0.5217 | Yes |
| 51 | <a href="#">PIK3R3</a> | PIK3R3<br><a href="#">Entrez</a> ,<br><a href="#">Source</a> | phosphoinositide-3-kinase, regulatory subunit 3 (p55, gamma)                             | 7209 | -0.454 | -0.5116 | Yes |
| 52 | <a href="#">PELI2</a>  | PELI2<br><a href="#">Entrez</a> ,<br><a href="#">Source</a>  | pellino homolog 2 (Drosophila)                                                           | 7265 | -0.469 | -0.5007 | Yes |
| 53 | <a href="#">IKBKG</a>  | IKBKG<br><a href="#">Entrez</a> ,<br><a href="#">Source</a>  | inhibitor of kappa light polypeptide gene enhancer in B-cells, kinase gamma              | 7299 | -0.479 | -0.4868 | Yes |
| 54 | <a href="#">MAPK1</a>  | MAPK1<br><a href="#">Entrez</a> ,<br><a href="#">Source</a>  | mitogen-activated protein kinase 1                                                       | 7446 | -0.522 | -0.4846 | Yes |
| 55 | <a href="#">TRAF6</a>  | TRAF6<br><a href="#">Entrez</a> ,<br><a href="#">Source</a>  | TNF receptor-associated factor 6                                                         | 7512 | -0.544 | -0.4721 | Yes |
| 56 | <a href="#">JAK2</a>   | JAK2<br><a href="#">Entrez</a> ,<br><a href="#">Source</a>   | Janus kinase 2 (a protein tyrosine kinase)                                               | 7541 | -0.554 | -0.4548 | Yes |
| 57 | <a href="#">SOS1</a>   | SOS1<br><a href="#">Entrez</a> ,<br><a href="#">Source</a>   | son of sevenless homolog 1 (Drosophila)                                                  | 7606 | -0.574 | -0.4411 | Yes |
| 58 | <a href="#">MAP2K4</a> | MAP2K4<br><a href="#">Entrez</a> ,<br><a href="#">Source</a> | mitogen-activated protein kinase kinase 4                                                | 7683 | -0.601 | -0.4278 | Yes |
| 59 | <a href="#">BTRC</a>   | BTRC<br><a href="#">Entrez</a> ,<br><a href="#">Source</a>   | beta-transducin repeat containing                                                        | 7791 | -0.647 | -0.4163 | Yes |
| 60 | <a href="#">MAP3K7</a> | MAP3K7<br><a href="#">Entrez</a> ,<br><a href="#">Source</a> | mitogen-activated protein kinase kinase kinase 7                                         | 8090 | -0.803 | -0.4215 | Yes |
| 61 | <a href="#">IL6ST</a>  | IL6ST<br><a href="#">Entrez</a> ,<br><a href="#">Source</a>  | interleukin 6 signal transducer (gp130, oncostatin M receptor)                           | 8110 | -0.814 | -0.3936 | Yes |
| 62 | <a href="#">JAK1</a>   | JAK1<br><a href="#">Entrez</a> ,<br><a href="#">Source</a>   | Janus kinase 1 (a protein tyrosine kinase)                                               | 8234 | -0.908 | -0.3744 | Yes |
| 63 | <a href="#">CBL</a>    | CBL<br><a href="#">Entrez</a> ,<br><a href="#">Source</a>    | Cas-Br-M (murine) ecotropic retroviral transforming sequence                             | 8393 | -1.070 | -0.3533 | Yes |
| 64 | <a href="#">YWHAB</a>  | YWHAB<br><a href="#">Entrez</a> ,<br><a href="#">Source</a>  | tyrosine 3-monooxygenase/tryptophan 5-monooxygenase activation protein, beta polypeptide | 8401 | -1.077 | -0.3143 | Yes |

|    |                        |                                                                              |                                                             |      |        |         |     |
|----|------------------------|------------------------------------------------------------------------------|-------------------------------------------------------------|------|--------|---------|-----|
| 65 | <a href="#">KRAS</a>   | <a href="#">KRAS</a><br><a href="#">Entrez</a> ,<br><a href="#">Source</a>   | v-Ki-ras2 Kirsten rat sarcoma viral oncogene homolog        | 8444 | -1.153 | -0.2766 | Yes |
| 66 | <a href="#">PIK3R1</a> | <a href="#">PIK3R1</a><br><a href="#">Entrez</a> ,<br><a href="#">Source</a> | phosphoinositide-3-kinase, regulatory subunit 1 (p85 alpha) | 8463 | -1.179 | -0.2351 | Yes |
| 67 | <a href="#">PELI1</a>  | <a href="#">PELI1</a><br><a href="#">Entrez</a> ,<br><a href="#">Source</a>  | pellino homolog 1 (Drosophila)                              | 8482 | -1.209 | -0.1925 | Yes |
| 68 | <a href="#">CRK</a>    | <a href="#">CRK</a><br><a href="#">Entrez</a> ,<br><a href="#">Source</a>    | v-crk sarcoma virus CT10 oncogene homolog (avian)           | 8490 | -1.223 | -0.1482 | Yes |
| 69 | <a href="#">CRKL</a>   | <a href="#">CRKL</a><br><a href="#">Entrez</a> ,<br><a href="#">Source</a>   | v-crk sarcoma virus CT10 oncogene homolog (avian)-like      | 8535 | -1.339 | -0.1038 | Yes |
| 70 | <a href="#">TOLLIP</a> | <a href="#">TOLLIP</a><br><a href="#">Entrez</a> ,<br><a href="#">Source</a> | toll interacting protein                                    | 8584 | -1.449 | -0.0559 | Yes |
| 71 | <a href="#">PRKACB</a> | <a href="#">PRKACB</a><br><a href="#">Entrez</a> ,<br><a href="#">Source</a> | protein kinase, cAMP-dependent, catalytic, beta             | 8614 | -1.677 | 0.0027  | Yes |

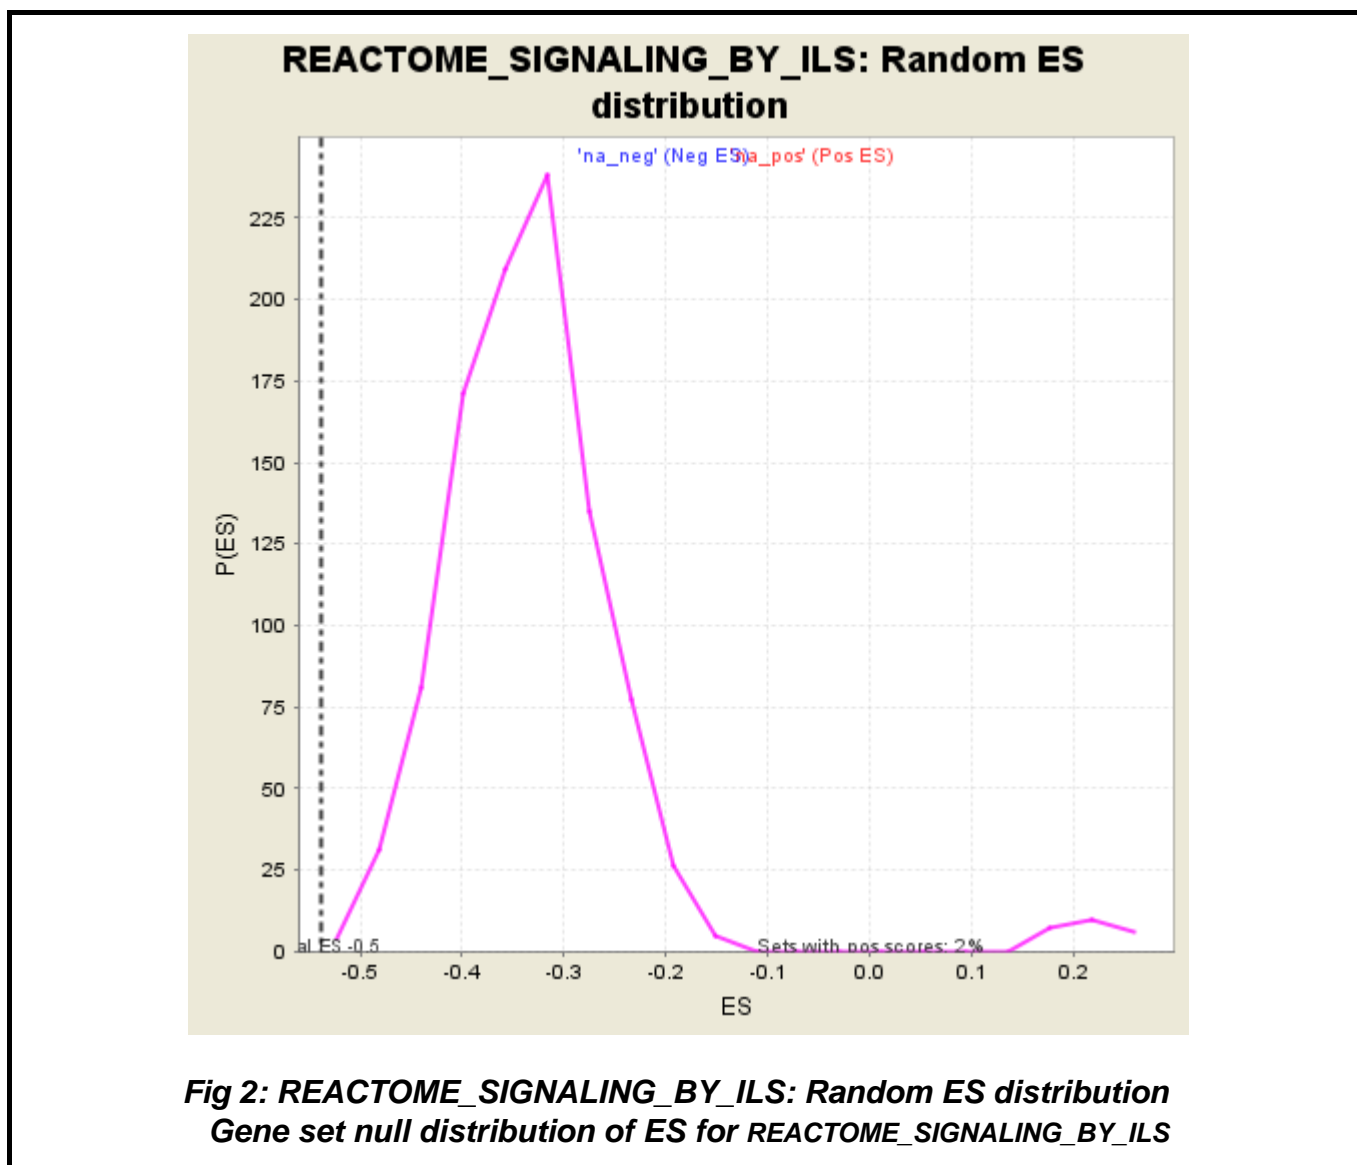



**Table: GSEA Results Summary**

|                                   |                                               |
|-----------------------------------|-----------------------------------------------|
| Dataset                           | GSEA_18M_collapsed                            |
| Phenotype                         | NoPhenotypeAvailable                          |
| Upregulated in class              | na_neg                                        |
| GeneSet                           | REACTOME_MAP_KINASE_ACTIVATION_IN_TLR_CASCADE |
| Enrichment Score (ES)             | -0.57339615                                   |
| Normalized Enrichment Score (NES) | -1.5781901                                    |
| Nominal p-value                   | 0.005376344                                   |
| FDR q-value                       | 0.22318275                                    |
| FWER p-Value                      | 0.878                                         |

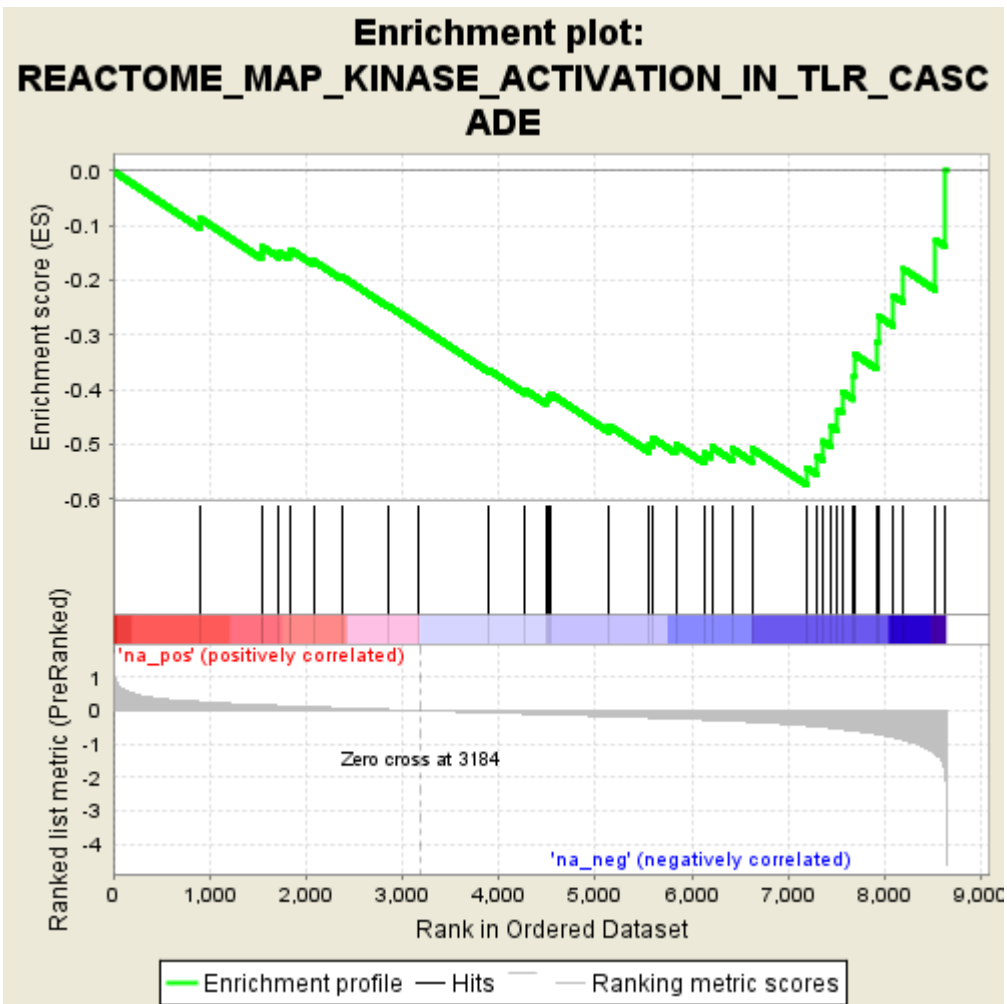

**Fig 1: Enrichment plot: REACTOME\_MAP\_KINASE\_ACTIVATION\_IN\_TLR\_CASCADE Profile of the Running ES Score & Positions of GeneSet Members on the Rank Ordered List**

**Table: GSEA details [\[plain text format\]](#)**

| PROBE | GENE | GENE_TITLE | RANK | RANK | RUNNING | CORE |
|-------|------|------------|------|------|---------|------|
|-------|------|------------|------|------|---------|------|



|    |                          | SYMBOL                                     |                                                                                      | IN GENE LIST | METRIC SCORE | ES      | ENRICHMENT |
|----|--------------------------|--------------------------------------------|--------------------------------------------------------------------------------------|--------------|--------------|---------|------------|
| 1  | <a href="#">MAPK8</a>    | MAPK8<br><a href="#">Entrez, Source</a>    | mitogen-activated protein kinase 8                                                   | 906          | 0.262        | -0.0871 | No         |
| 2  | <a href="#">RPS6KA1</a>  | RPS6KA1<br><a href="#">Entrez, Source</a>  | ribosomal protein S6 kinase, 90kDa, polypeptide 1                                    | 1540         | 0.165        | -0.1493 | No         |
| 3  | <a href="#">FOS</a>      | FOS<br><a href="#">Entrez, Source</a>      | v-fos FBJ murine osteosarcoma viral oncogene homolog                                 | 1548         | 0.164        | -0.1386 | No         |
| 4  | <a href="#">MEF2A</a>    | MEF2A<br><a href="#">Entrez, Source</a>    | MADS box transcription enhancer factor 2, polypeptide A (myocyte enhancer factor 2A) | 1719         | 0.145        | -0.1483 | No         |
| 5  | <a href="#">MAPK11</a>   | MAPK11<br><a href="#">Entrez, Source</a>   | mitogen-activated protein kinase 11                                                  | 1826         | 0.131        | -0.1515 | No         |
| 6  | <a href="#">PPP2R1B</a>  | PPP2R1B<br><a href="#">Entrez, Source</a>  | protein phosphatase 2 (formerly 2A), regulatory subunit A (PR 65), beta isoform      | 1840         | 0.130        | -0.1440 | No         |
| 7  | <a href="#">IRAK1</a>    | IRAK1<br><a href="#">Entrez, Source</a>    | interleukin-1 receptor-associated kinase 1                                           | 2078         | 0.104        | -0.1643 | No         |
| 8  | <a href="#">MAP2K3</a>   | MAP2K3<br><a href="#">Entrez, Source</a>   | mitogen-activated protein kinase kinase 3                                            | 2365         | 0.077        | -0.1922 | No         |
| 9  | <a href="#">MAPK7</a>    | MAPK7<br><a href="#">Entrez, Source</a>    | mitogen-activated protein kinase 7                                                   | 2852         | 0.029        | -0.2467 | No         |
| 10 | <a href="#">RPS6KA2</a>  | RPS6KA2<br><a href="#">Entrez, Source</a>  | ribosomal protein S6 kinase, 90kDa, polypeptide 2                                    | 3164         | 0.002        | -0.2828 | No         |
| 11 | <a href="#">MAPKAPK3</a> | MAPKAPK3<br><a href="#">Entrez, Source</a> | mitogen-activated protein kinase-activated protein kinase 3                          | 3892         | -0.060       | -0.3631 | No         |
| 12 | <a href="#">DUSP3</a>    | DUSP3<br><a href="#">Entrez, Source</a>    | dual specificity phosphatase 3 (vaccinia virus phosphatase VH1-related)              | 4269         | -0.093       | -0.4004 | No         |
| 13 | <a href="#">MAPKAPK2</a> | MAPKAPK2<br><a href="#">Entrez, Source</a> | mitogen-activated protein kinase-activated protein kinase 2                          | 4486         | -0.112       | -0.4177 | No         |
| 14 | <a href="#">MAPK3</a>    | MAPK3<br><a href="#">Entrez, Source</a>    | mitogen-activated protein kinase 3                                                   | 4509         | -0.114       | -0.4124 | No         |
| 15 | <a href="#">ATF1</a>     | ATF1<br><a href="#">Entrez, Source</a>     | activating transcription factor 1                                                    | 4537         | -0.116       | -0.4074 | No         |

|    |                         |                                                               |                                                                                      |      |        |         |     |
|----|-------------------------|---------------------------------------------------------------|--------------------------------------------------------------------------------------|------|--------|---------|-----|
| 16 | <a href="#">PPP2CB</a>  | PPP2CB<br><a href="#">Entrez</a> ,<br><a href="#">Source</a>  | protein phosphatase 2 (formerly 2A), catalytic subunit, beta isoform                 | 5137 | -0.170 | -0.4653 | No  |
| 17 | <a href="#">MAP2K1</a>  | MAP2K1<br><a href="#">Entrez</a> ,<br><a href="#">Source</a>  | mitogen-activated protein kinase kinase 1                                            | 5558 | -0.211 | -0.4995 | No  |
| 18 | <a href="#">MAP2K6</a>  | MAP2K6<br><a href="#">Entrez</a> ,<br><a href="#">Source</a>  | mitogen-activated protein kinase kinase 6                                            | 5589 | -0.213 | -0.4882 | No  |
| 19 | <a href="#">CREB1</a>   | CREB1<br><a href="#">Entrez</a> ,<br><a href="#">Source</a>   | cAMP responsive element binding protein 1                                            | 5833 | -0.238 | -0.4999 | No  |
| 20 | <a href="#">JUN</a>     | JUN<br><a href="#">Entrez</a> ,<br><a href="#">Source</a>     | jun oncogene                                                                         | 6134 | -0.272 | -0.5159 | No  |
| 21 | <a href="#">DUSP7</a>   | DUSP7<br><a href="#">Entrez</a> ,<br><a href="#">Source</a>   | dual specificity phosphatase 7                                                       | 6205 | -0.281 | -0.5045 | No  |
| 22 | <a href="#">MAPK10</a>  | MAPK10<br><a href="#">Entrez</a> ,<br><a href="#">Source</a>  | mitogen-activated protein kinase 10                                                  | 6420 | -0.307 | -0.5080 | No  |
| 23 | <a href="#">MEF2C</a>   | MEF2C<br><a href="#">Entrez</a> ,<br><a href="#">Source</a>   | MADS box transcription enhancer factor 2, polypeptide C (myocyte enhancer factor 2C) | 6625 | -0.339 | -0.5082 | No  |
| 24 | <a href="#">ELK1</a>    | ELK1<br><a href="#">Entrez</a> ,<br><a href="#">Source</a>    | ELK1, member of ETS oncogene family                                                  | 7187 | -0.449 | -0.5422 | Yes |
| 25 | <a href="#">IKBKG</a>   | IKBKG<br><a href="#">Entrez</a> ,<br><a href="#">Source</a>   | inhibitor of kappa light polypeptide gene enhancer in B-cells, kinase gamma          | 7299 | -0.479 | -0.5218 | Yes |
| 26 | <a href="#">DUSP6</a>   | DUSP6<br><a href="#">Entrez</a> ,<br><a href="#">Source</a>   | dual specificity phosphatase 6                                                       | 7361 | -0.498 | -0.4943 | Yes |
| 27 | <a href="#">MAPK1</a>   | MAPK1<br><a href="#">Entrez</a> ,<br><a href="#">Source</a>   | mitogen-activated protein kinase 1                                                   | 7446 | -0.522 | -0.4678 | Yes |
| 28 | <a href="#">TRAF6</a>   | TRAF6<br><a href="#">Entrez</a> ,<br><a href="#">Source</a>   | TNF receptor-associated factor 6                                                     | 7512 | -0.544 | -0.4375 | Yes |
| 29 | <a href="#">RPS6KA3</a> | RPS6KA3<br><a href="#">Entrez</a> ,<br><a href="#">Source</a> | ribosomal protein S6 kinase, 90kDa, polypeptide 3                                    | 7559 | -0.558 | -0.4041 | Yes |
| 30 | <a href="#">MAP2K7</a>  | MAP2K7<br><a href="#">Entrez</a> ,<br><a href="#">Source</a>  | mitogen-activated protein kinase kinase 7                                            | 7677 | -0.600 | -0.3760 | Yes |
| 31 | <a href="#">MAP2K4</a>  | MAP2K4<br><a href="#">Entrez</a> ,<br><a href="#">Source</a>  | mitogen-activated protein kinase kinase 4                                            | 7683 | -0.601 | -0.3348 | Yes |

|    |                         |                                           |                                                   |      |        |         |     |
|----|-------------------------|-------------------------------------------|---------------------------------------------------|------|--------|---------|-----|
| 32 | <a href="#">DUSP4</a>   | DUSP4<br><a href="#">Entrez, Source</a>   | dual specificity phosphatase 4                    | 7913 | -0.701 | -0.3127 | Yes |
| 33 | <a href="#">ATF2</a>    | ATF2<br><a href="#">Entrez, Source</a>    | activating transcription factor 2                 | 7931 | -0.710 | -0.2654 | Yes |
| 34 | <a href="#">MAP3K7</a>  | MAP3K7<br><a href="#">Entrez, Source</a>  | mitogen-activated protein kinase kinase kinase 7  | 8090 | -0.803 | -0.2280 | Yes |
| 35 | <a href="#">MAPK14</a>  | MAPK14<br><a href="#">Entrez, Source</a>  | mitogen-activated protein kinase 14               | 8194 | -0.875 | -0.1791 | Yes |
| 36 | <a href="#">MAPK9</a>   | MAPK9<br><a href="#">Entrez, Source</a>   | mitogen-activated protein kinase 9                | 8528 | -1.320 | -0.1261 | Yes |
| 37 | <a href="#">RPS6KA5</a> | RPS6KA5<br><a href="#">Entrez, Source</a> | ribosomal protein S6 kinase, 90kDa, polypeptide 5 | 8631 | -1.996 | 0.0007  | Yes |

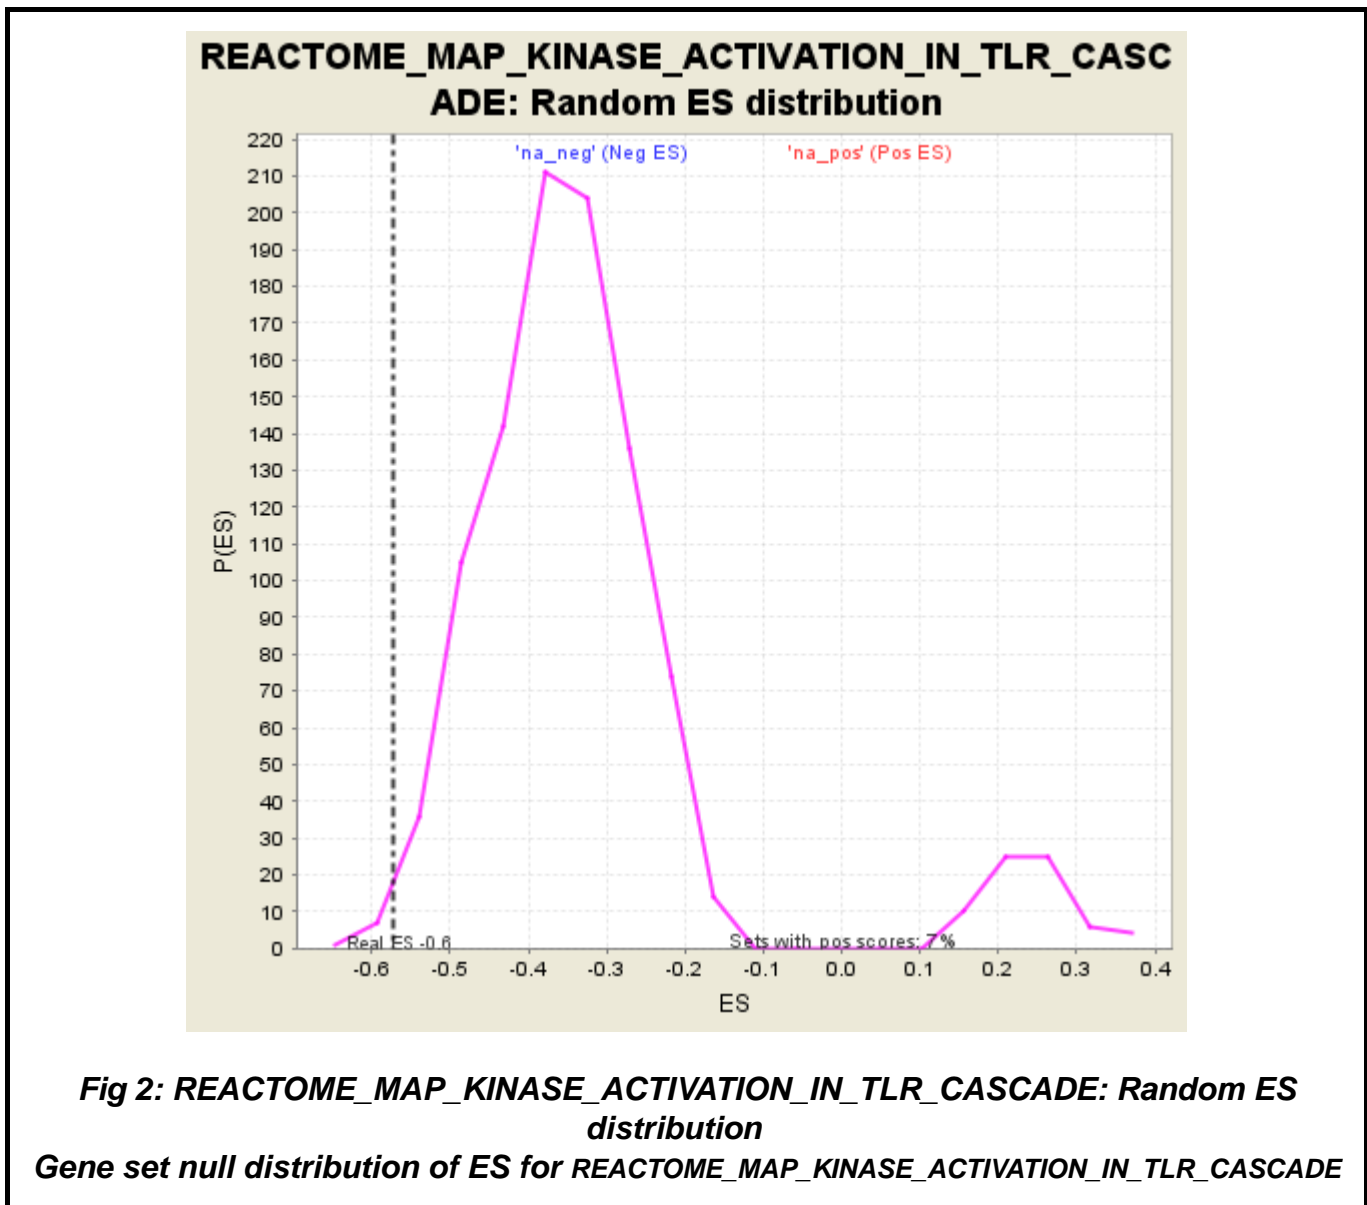

**Fig 2: REACTOME\_MAP\_KINASE\_ACTIVATION\_IN\_TLR\_CASCADE: Random ES distribution**

**Gene set null distribution of ES for REACTOME\_MAP\_KINASE\_ACTIVATION\_IN\_TLR\_CASCADE**

**Table: GSEA Results Summary**

|                                   |                                |
|-----------------------------------|--------------------------------|
| Dataset                           | GSEA_18M_collapsed             |
| Phenotype                         | NoPhenotypeAvailable           |
| Upregulated in class              | na_neg                         |
| GeneSet                           | REACTOME_ION_CHANNEL_TRANSPORT |
| Enrichment Score (ES)             | -0.57235                       |
| Normalized Enrichment Score (NES) | -1.5682837                     |
| Nominal p-value                   | 0.0075593954                   |
| FDR q-value                       | 0.23073831                     |
| FWER p-Value                      | 0.907                          |

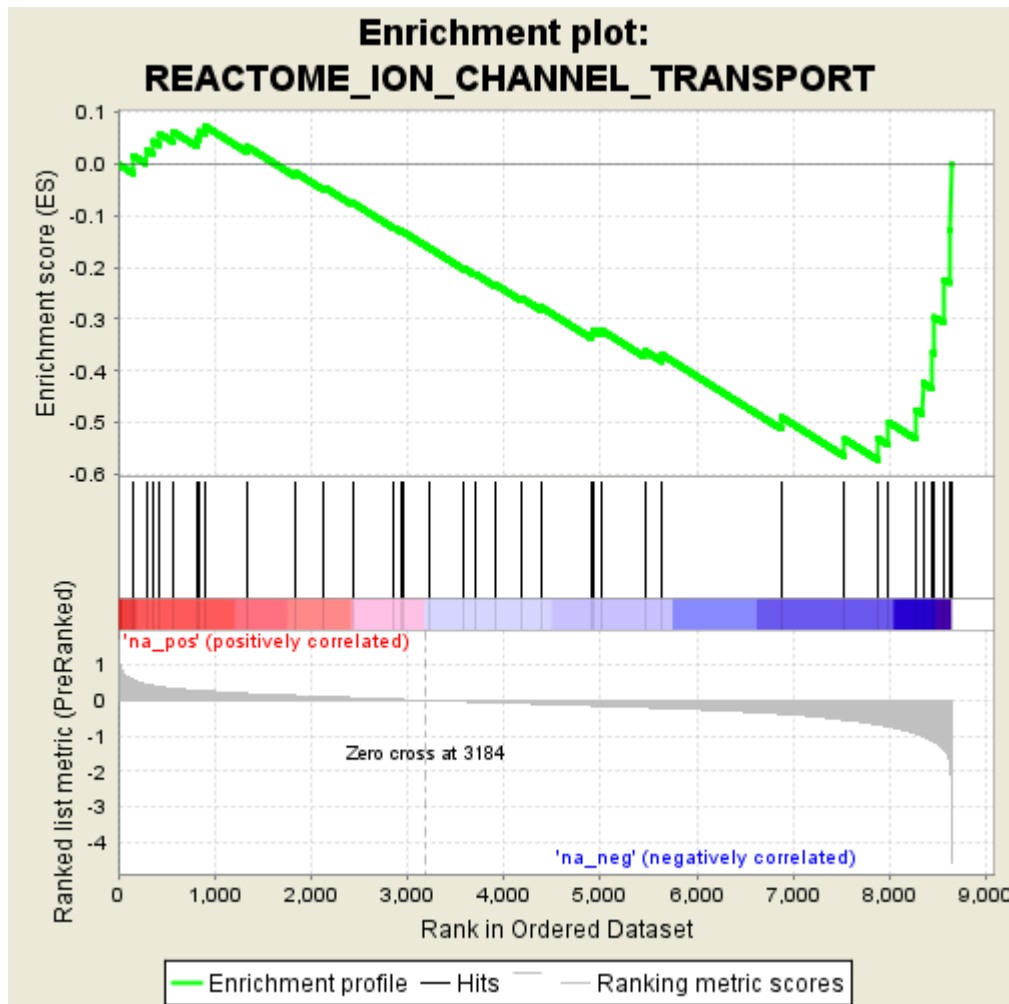

**Fig 1: Enrichment plot: REACTOME\_ION\_CHANNEL\_TRANSPORT**  
**Profile of the Running ES Score & Positions of GeneSet Members on the Rank Ordered List**

**Table: GSEA details [\[plain text format\]](#)**

| PROBE | GENE | GENE_TITLE | RANK | RANK | RUNNING | CORE |
|-------|------|------------|------|------|---------|------|
|-------|------|------------|------|------|---------|------|

|    |                        | SYMBOL                                                       |                                                                        | IN GENE LIST | METRIC SCORE | ES      | ENRICHMENT |
|----|------------------------|--------------------------------------------------------------|------------------------------------------------------------------------|--------------|--------------|---------|------------|
| 1  | <a href="#">ATP1A1</a> | ATP1A1<br><a href="#">Entrez</a> ,<br><a href="#">Source</a> | ATPase, Na+/K+ transporting, alpha 1 polypeptide                       | 157          | 0.571        | 0.0162  | No         |
| 2  | <a href="#">ATP2A1</a> | ATP2A1<br><a href="#">Entrez</a> ,<br><a href="#">Source</a> | ATPase, Ca++ transporting, cardiac muscle, fast twitch 1               | 289          | 0.446        | 0.0278  | No         |
| 3  | <a href="#">FXVD2</a>  | FXVD2<br><a href="#">Entrez</a> ,<br><a href="#">Source</a>  | FXVD domain containing ion transport regulator 2                       | 358          | 0.410        | 0.0446  | No         |
| 4  | <a href="#">GABRG3</a> | GABRG3<br><a href="#">Entrez</a> ,<br><a href="#">Source</a> | gamma-aminobutyric acid (GABA) A receptor, gamma 3                     | 429          | 0.375        | 0.0591  | No         |
| 5  | <a href="#">ATP7B</a>  | ATP7B<br><a href="#">Entrez</a> ,<br><a href="#">Source</a>  | ATPase, Cu++ transporting, beta polypeptide                            | 570          | 0.328        | 0.0626  | No         |
| 6  | <a href="#">GLRA2</a>  | GLRA2<br><a href="#">Entrez</a> ,<br><a href="#">Source</a>  | glycine receptor, alpha 2                                              | 822          | 0.277        | 0.0501  | No         |
| 7  | <a href="#">ATP10A</a> | ATP10A<br><a href="#">Entrez</a> ,<br><a href="#">Source</a> | ATPase, Class V, type 10A                                              | 845          | 0.273        | 0.0640  | No         |
| 8  | <a href="#">ATP8A2</a> | ATP8A2<br><a href="#">Entrez</a> ,<br><a href="#">Source</a> | ATPase, aminophospholipid transporter-like, Class I, type 8A, member 2 | 903          | 0.262        | 0.0731  | No         |
| 9  | <a href="#">ATP8B1</a> | ATP8B1<br><a href="#">Entrez</a> ,<br><a href="#">Source</a> | ATPase, Class I, type 8B, member 1                                     | 1339         | 0.189        | 0.0339  | No         |
| 10 | <a href="#">ATP11B</a> | ATP11B<br><a href="#">Entrez</a> ,<br><a href="#">Source</a> | ATPase, Class VI, type 11B                                             | 1843         | 0.130        | -0.0168 | No         |
| 11 | <a href="#">GABRB1</a> | GABRB1<br><a href="#">Entrez</a> ,<br><a href="#">Source</a> | gamma-aminobutyric acid (GABA) A receptor, beta 1                      | 2136         | 0.100        | -0.0447 | No         |
| 12 | <a href="#">ATP7A</a>  | ATP7A<br><a href="#">Entrez</a> ,<br><a href="#">Source</a>  | ATPase, Cu++ transporting, alpha polypeptide (Menkes syndrome)         | 2432         | 0.070        | -0.0748 | No         |
| 13 | <a href="#">GLRA3</a>  | GLRA3<br><a href="#">Entrez</a> ,<br><a href="#">Source</a>  | glycine receptor, alpha 3                                              | 2859         | 0.028        | -0.1226 | No         |
| 14 | <a href="#">ATP9B</a>  | ATP9B<br><a href="#">Entrez</a> ,<br><a href="#">Source</a>  | ATPase, Class II, type 9B                                              | 2927         | 0.022        | -0.1291 | No         |
| 15 | <a href="#">ATP1A2</a> | ATP1A2<br><a href="#">Entrez</a> ,<br><a href="#">Source</a> | ATPase, Na+/K+ transporting, alpha 2 (+) polypeptide                   | 2948         | 0.020        | -0.1302 | No         |
| 16 | <a href="#">GABRA3</a> | GABRA3<br><a href="#">Entrez</a> ,<br><a href="#">Source</a> | gamma-aminobutyric acid (GABA) A receptor, alpha 3                     | 3222         | -0.003       | -0.1617 | No         |

|    |                         |                                                               |                                                                               |      |        |         |     |
|----|-------------------------|---------------------------------------------------------------|-------------------------------------------------------------------------------|------|--------|---------|-----|
| 17 | <a href="#">GLRA1</a>   | GLRA1<br><a href="#">Entrez</a> ,<br><a href="#">Source</a>   | glycine receptor, alpha 1 (startle disease/hyperekplexia, stiff man syndrome) | 3587 | -0.036 | -0.2019 | No  |
| 18 | <a href="#">ATP2A2</a>  | ATP2A2<br><a href="#">Entrez</a> ,<br><a href="#">Source</a>  | ATPase, Ca <sup>++</sup> transporting, cardiac muscle, slow twitch 2          | 3695 | -0.045 | -0.2116 | No  |
| 19 | <a href="#">ATP2B3</a>  | ATP2B3<br><a href="#">Entrez</a> ,<br><a href="#">Source</a>  | ATPase, Ca <sup>++</sup> transporting, plasma membrane 3                      | 3908 | -0.061 | -0.2326 | No  |
| 20 | <a href="#">GABRR2</a>  | GABRR2<br><a href="#">Entrez</a> ,<br><a href="#">Source</a>  | gamma-aminobutyric acid (GABA) receptor, rho 2                                | 4177 | -0.086 | -0.2586 | No  |
| 21 | <a href="#">ATP2B2</a>  | ATP2B2<br><a href="#">Entrez</a> ,<br><a href="#">Source</a>  | ATPase, Ca <sup>++</sup> transporting, plasma membrane 2                      | 4383 | -0.103 | -0.2762 | No  |
| 22 | <a href="#">ATP10B</a>  | ATP10B<br><a href="#">Entrez</a> ,<br><a href="#">Source</a>  | ATPase, Class V, type 10B                                                     | 4905 | -0.150 | -0.3278 | No  |
| 23 | <a href="#">ATP1B3</a>  | ATP1B3<br><a href="#">Entrez</a> ,<br><a href="#">Source</a>  | ATPase, Na <sup>+</sup> /K <sup>+</sup> transporting, beta 3 polypeptide      | 4925 | -0.151 | -0.3209 | No  |
| 24 | <a href="#">ATP8A1</a>  | ATP8A1<br><a href="#">Entrez</a> ,<br><a href="#">Source</a>  | ATPase, aminophospholipid transporter (APLT), Class I, type 8A, member 1      | 5014 | -0.159 | -0.3215 | No  |
| 25 | <a href="#">GABRA5</a>  | GABRA5<br><a href="#">Entrez</a> ,<br><a href="#">Source</a>  | gamma-aminobutyric acid (GABA) A receptor, alpha 5                            | 5460 | -0.201 | -0.3612 | No  |
| 26 | <a href="#">GABRA4</a>  | GABRA4<br><a href="#">Entrez</a> ,<br><a href="#">Source</a>  | gamma-aminobutyric acid (GABA) A receptor, alpha 4                            | 5639 | -0.218 | -0.3687 | No  |
| 27 | <a href="#">ARHGEF9</a> | ARHGEF9<br><a href="#">Entrez</a> ,<br><a href="#">Source</a> | Cdc42 guanine nucleotide exchange factor (GEF) 9                              | 6877 | -0.384 | -0.4894 | No  |
| 28 | <a href="#">GABRA2</a>  | GABRA2<br><a href="#">Entrez</a> ,<br><a href="#">Source</a>  | gamma-aminobutyric acid (GABA) A receptor, alpha 2                            | 7531 | -0.550 | -0.5321 | Yes |
| 29 | <a href="#">ATP2A3</a>  | ATP2A3<br><a href="#">Entrez</a> ,<br><a href="#">Source</a>  | ATPase, Ca <sup>++</sup> transporting, ubiquitous                             | 7878 | -0.687 | -0.5310 | Yes |
| 30 | <a href="#">GABRA6</a>  | GABRA6<br><a href="#">Entrez</a> ,<br><a href="#">Source</a>  | gamma-aminobutyric acid (GABA) A receptor, alpha 6                            | 7988 | -0.737 | -0.4992 | Yes |
| 31 | <a href="#">GABRG2</a>  | GABRG2<br><a href="#">Entrez</a> ,<br><a href="#">Source</a>  | gamma-aminobutyric acid (GABA) A receptor, gamma 2                            | 8267 | -0.934 | -0.4753 | Yes |
| 32 | <a href="#">ATP11C</a>  | ATP11C<br><a href="#">Entrez</a> ,<br><a href="#">Source</a>  | ATPase, Class VI, type 11C                                                    | 8343 | -1.013 | -0.4230 | Yes |

|    |                        |                                                              |                                                    |      |        |         |     |
|----|------------------------|--------------------------------------------------------------|----------------------------------------------------|------|--------|---------|-----|
| 33 | <a href="#">ATP2C1</a> | ATP2C1<br><a href="#">Entrez</a> ,<br><a href="#">Source</a> | ATPase, Ca++ transporting, type 2C, member 1       | 8445 | -1.154 | -0.3652 | Yes |
| 34 | <a href="#">ATP1B2</a> | ATP1B2<br><a href="#">Entrez</a> ,<br><a href="#">Source</a> | ATPase, Na+/K+ transporting, beta 2 polypeptide    | 8462 | -1.179 | -0.2960 | Yes |
| 35 | <a href="#">GABRA1</a> | GABRA1<br><a href="#">Entrez</a> ,<br><a href="#">Source</a> | gamma-aminobutyric acid (GABA) A receptor, alpha 1 | 8559 | -1.387 | -0.2236 | Yes |
| 36 | <a href="#">GABRB3</a> | GABRB3<br><a href="#">Entrez</a> ,<br><a href="#">Source</a> | gamma-aminobutyric acid (GABA) A receptor, beta 3  | 8619 | -1.698 | -0.1282 | Yes |
| 37 | <a href="#">GABRB2</a> | GABRB2<br><a href="#">Entrez</a> ,<br><a href="#">Source</a> | gamma-aminobutyric acid (GABA) A receptor, beta 2  | 8633 | -2.160 | 0.0005  | Yes |

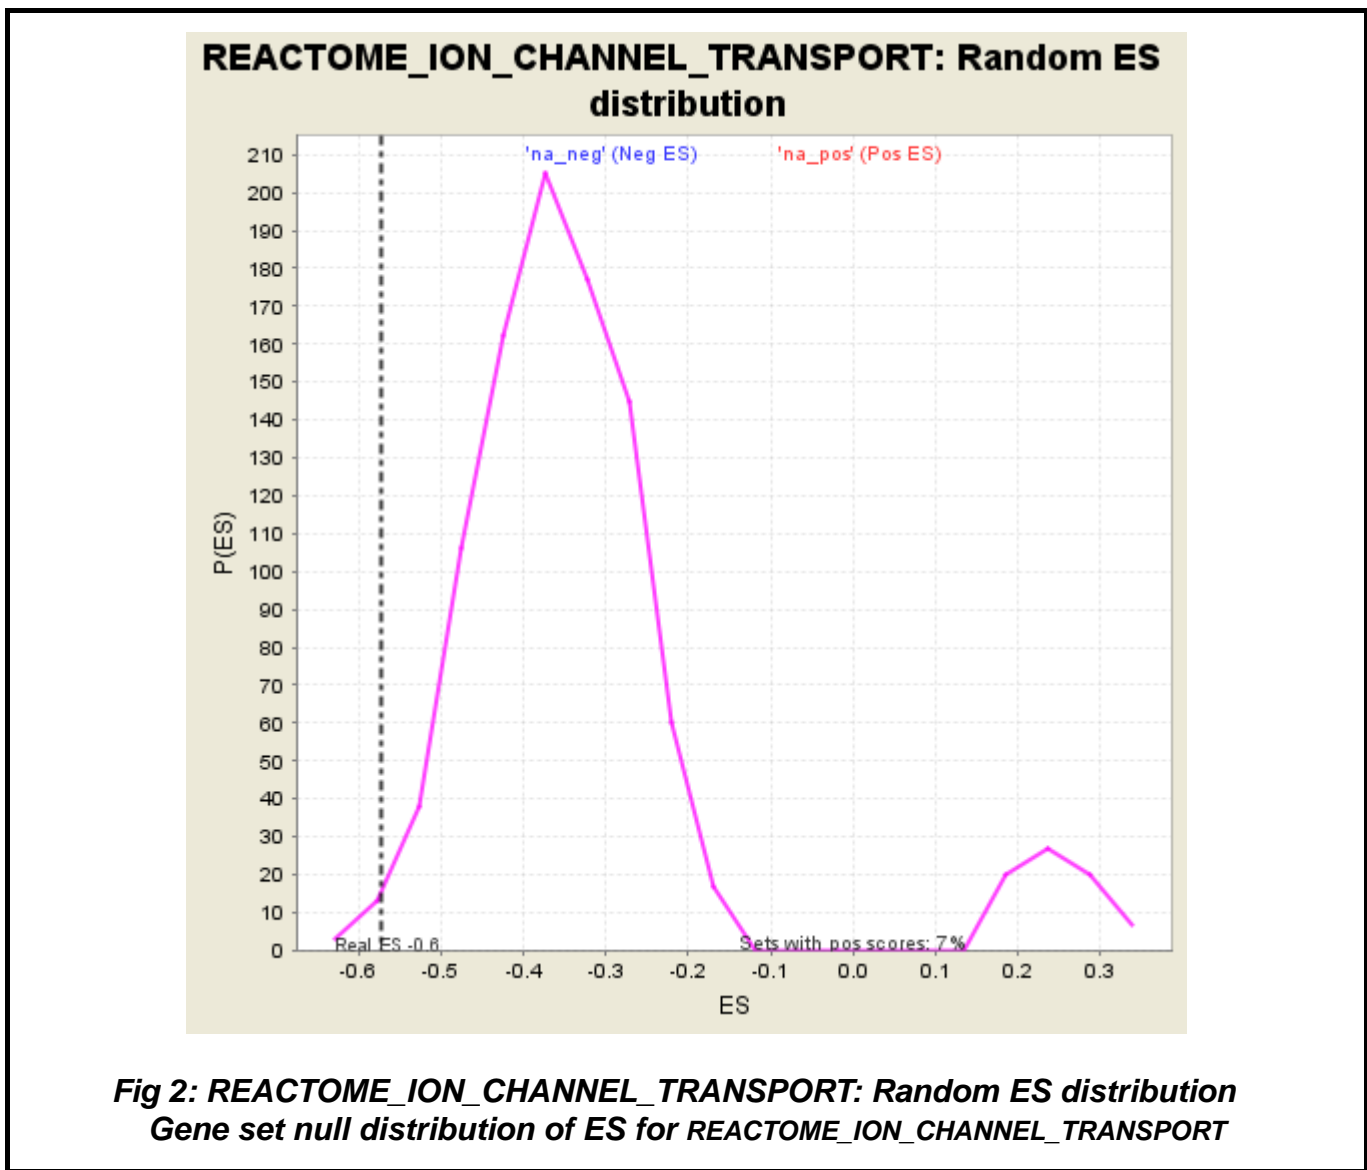

**Fig 2: REACTOME\_ION\_CHANNEL\_TRANSPORT: Random ES distribution**  
**Gene set null distribution of ES for REACTOME\_ION\_CHANNEL\_TRANSPORT**

**Table: GSEA Results Summary**

|                                   |                                      |
|-----------------------------------|--------------------------------------|
| Dataset                           | GSEA_18M_collapsed                   |
| Phenotype                         | NoPhenotypeAvailable                 |
| Upregulated in class              | na_neg                               |
| GeneSet                           | REACTOME_SIGNALING_BY_EGFR_IN_CANCER |
| Enrichment Score (ES)             | -0.5272721                           |
| Normalized Enrichment Score (NES) | -1.5673778                           |
| Nominal p-value                   | 0.0                                  |
| FDR q-value                       | 0.21364374                           |
| FWER p-Value                      | 0.91                                 |

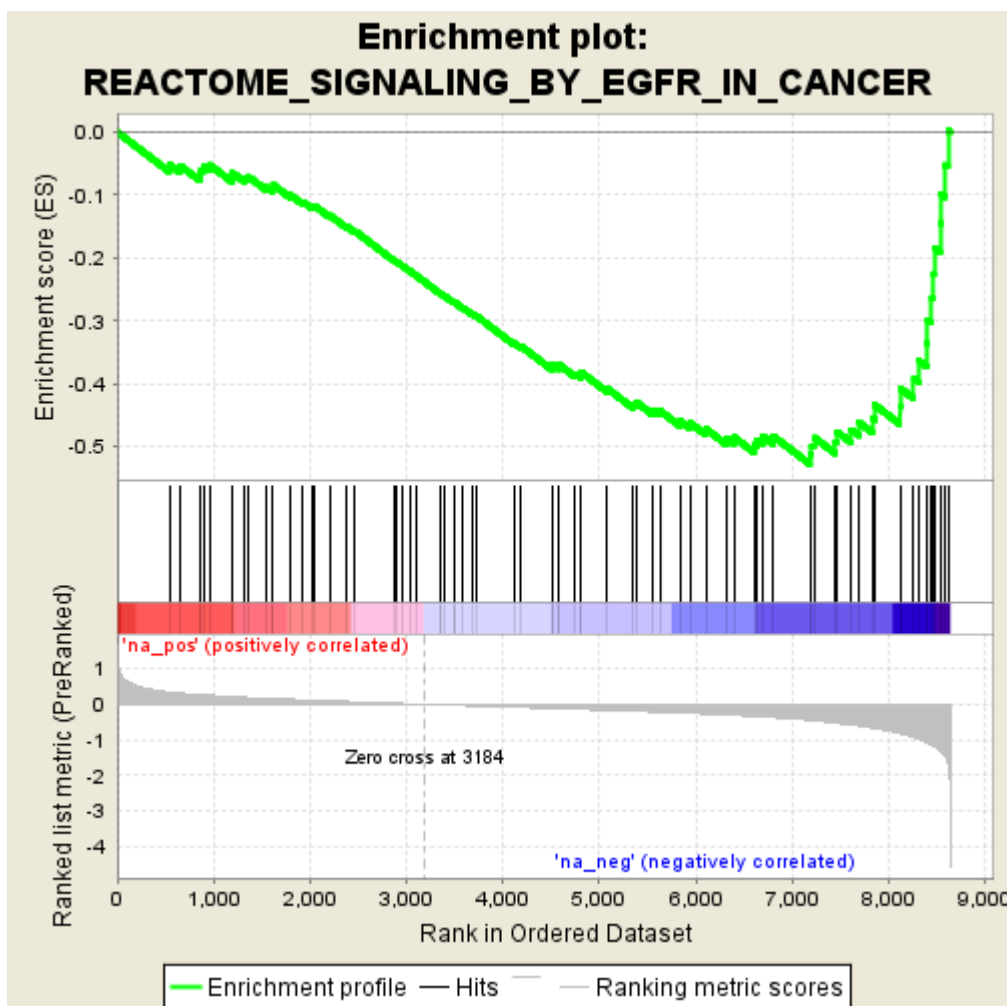

**Fig 1: Enrichment plot: REACTOME\_SIGNALING\_BY\_EGFR\_IN\_CANCER**  
**Profile of the Running ES Score & Positions of GeneSet Members on the Rank Ordered List**

**Table: GSEA details [\[plain text format\]](#)**

| PROBE | GENE | GENE_TITLE | RANK | RANK | RUNNING | CORE |
|-------|------|------------|------|------|---------|------|
|-------|------|------------|------|------|---------|------|



|    |                         | SYMBOL                                                        |                                                                         | IN GENE LIST | METRIC SCORE | ES      | ENRICHMENT |
|----|-------------------------|---------------------------------------------------------------|-------------------------------------------------------------------------|--------------|--------------|---------|------------|
| 1  | <a href="#">CHUK</a>    | CHUK<br><a href="#">Entrez</a> ,<br><a href="#">Source</a>    | conserved helix-loop-helix ubiquitous kinase                            | 539          | 0.337        | -0.0512 | No         |
| 2  | <a href="#">NR4A1</a>   | NR4A1<br><a href="#">Entrez</a> ,<br><a href="#">Source</a>   | nuclear receptor subfamily 4, group A, member 1                         | 647          | 0.310        | -0.0529 | No         |
| 3  | <a href="#">PTEN</a>    | PTEN<br><a href="#">Entrez</a> ,<br><a href="#">Source</a>    | phosphatase and tensin homolog (mutated in multiple advanced cancers 1) | 855          | 0.271        | -0.0677 | No         |
| 4  | <a href="#">ADCY1</a>   | ADCY1<br><a href="#">Entrez</a> ,<br><a href="#">Source</a>   | adenylate cyclase 1 (brain)                                             | 868          | 0.269        | -0.0597 | No         |
| 5  | <a href="#">PRKACA</a>  | PRKACA<br><a href="#">Entrez</a> ,<br><a href="#">Source</a>  | protein kinase, cAMP-dependent, catalytic, alpha                        | 893          | 0.264        | -0.0533 | No         |
| 6  | <a href="#">EPS15L1</a> | EPS15L1<br><a href="#">Entrez</a> ,<br><a href="#">Source</a> | epidermal growth factor receptor pathway substrate 15-like 1            | 960          | 0.250        | -0.0524 | No         |
| 7  | <a href="#">ADCY5</a>   | ADCY5<br><a href="#">Entrez</a> ,<br><a href="#">Source</a>   | adenylate cyclase 5                                                     | 1188         | 0.212        | -0.0715 | No         |
| 8  | <a href="#">CLTC</a>    | CLTC<br><a href="#">Entrez</a> ,<br><a href="#">Source</a>    | clathrin, heavy chain (Hc)                                              | 1194         | 0.211        | -0.0648 | No         |
| 9  | <a href="#">ADAM12</a>  | ADAM12<br><a href="#">Entrez</a> ,<br><a href="#">Source</a>  | ADAM metallopeptidase domain 12 (meltrin alpha)                         | 1315         | 0.192        | -0.0721 | No         |
| 10 | <a href="#">TRIB3</a>   | TRIB3<br><a href="#">Entrez</a> ,<br><a href="#">Source</a>   | tribbles homolog 3 (Drosophila)                                         | 1365         | 0.185        | -0.0713 | No         |
| 11 | <a href="#">RPS6KB2</a> | RPS6KB2<br><a href="#">Entrez</a> ,<br><a href="#">Source</a> | ribosomal protein S6 kinase, 70kDa, polypeptide 2                       | 1550         | 0.164        | -0.0871 | No         |
| 12 | <a href="#">ITPR2</a>   | ITPR2<br><a href="#">Entrez</a> ,<br><a href="#">Source</a>   | inositol 1,4,5-triphosphate receptor, type 2                            | 1615         | 0.156        | -0.0892 | No         |
| 13 | <a href="#">ADAM10</a>  | ADAM10<br><a href="#">Entrez</a> ,<br><a href="#">Source</a>  | ADAM metallopeptidase domain 10                                         | 1617         | 0.156        | -0.0839 | No         |
| 14 | <a href="#">RAF1</a>    | RAF1<br><a href="#">Entrez</a> ,<br><a href="#">Source</a>    | v-raf-1 murine leukemia viral oncogene homolog 1                        | 1794         | 0.134        | -0.0998 | No         |
| 15 | <a href="#">AP2A1</a>   | AP2A1<br><a href="#">Entrez</a> ,<br><a href="#">Source</a>   | adaptor-related protein complex 2, alpha 1 subunit                      | 1919         | 0.121        | -0.1100 | No         |
| 16 | <a href="#">CLTA</a>    | CLTA<br><a href="#">Entrez</a> ,<br><a href="#">Source</a>    | clathrin, light chain (Lca)                                             | 2024         | 0.110        | -0.1184 | No         |

|    |                         |                                                               |                                                                                                             |      |        |         |    |
|----|-------------------------|---------------------------------------------------------------|-------------------------------------------------------------------------------------------------------------|------|--------|---------|----|
| 17 | <a href="#">ADCY6</a>   | ADCY6<br><a href="#">Entrez</a> ,<br><a href="#">Source</a>   | adenylate cyclase 6                                                                                         | 2045 | 0.108  | -0.1170 | No |
| 18 | <a href="#">PRKCD</a>   | PRKCD<br><a href="#">Entrez</a> ,<br><a href="#">Source</a>   | protein kinase C, delta                                                                                     | 2203 | 0.093  | -0.1321 | No |
| 19 | <a href="#">ADCY7</a>   | ADCY7<br><a href="#">Entrez</a> ,<br><a href="#">Source</a>   | adenylate cyclase 7                                                                                         | 2380 | 0.075  | -0.1500 | No |
| 20 | <a href="#">PDE1B</a>   | PDE1B<br><a href="#">Entrez</a> ,<br><a href="#">Source</a>   | phosphodiesterase 1B,<br>calmodulin-dependent                                                               | 2464 | 0.067  | -0.1574 | No |
| 21 | <a href="#">GSK3A</a>   | GSK3A<br><a href="#">Entrez</a> ,<br><a href="#">Source</a>   | glycogen synthase kinase 3<br>alpha                                                                         | 2867 | 0.027  | -0.2034 | No |
| 22 | <a href="#">CSK</a>     | CSK<br><a href="#">Entrez</a> ,<br><a href="#">Source</a>     | c-src tyrosine kinase                                                                                       | 2899 | 0.025  | -0.2061 | No |
| 23 | <a href="#">CDKN1A</a>  | CDKN1A<br><a href="#">Entrez</a> ,<br><a href="#">Source</a>  | cyclin-dependent kinase inhibitor<br>1A (p21, Cip1)                                                         | 2964 | 0.018  | -0.2130 | No |
| 24 | <a href="#">PAG1</a>    | PAG1<br><a href="#">Entrez</a> ,<br><a href="#">Source</a>    | phosphoprotein associated with<br>glycosphingolipid microdomains<br>1                                       | 3035 | 0.012  | -0.2207 | No |
| 25 | <a href="#">PDE1A</a>   | PDE1A<br><a href="#">Entrez</a> ,<br><a href="#">Source</a>   | phosphodiesterase 1A,<br>calmodulin-dependent                                                               | 3101 | 0.006  | -0.2281 | No |
| 26 | <a href="#">PDPK1</a>   | PDPK1<br><a href="#">Entrez</a> ,<br><a href="#">Source</a>   | 3-phosphoinositide dependent<br>protein kinase-1                                                            | 3347 | -0.015 | -0.2562 | No |
| 27 | <a href="#">EGFR</a>    | EGFR<br><a href="#">Entrez</a> ,<br><a href="#">Source</a>    | epidermal growth factor receptor<br>(erythroblastic leukemia viral<br>(v-erb-b) oncogene homolog,<br>avian) | 3352 | -0.015 | -0.2562 | No |
| 28 | <a href="#">EPN1</a>    | EPN1<br><a href="#">Entrez</a> ,<br><a href="#">Source</a>    | epsin 1                                                                                                     | 3398 | -0.019 | -0.2608 | No |
| 29 | <a href="#">CDKN1B</a>  | CDKN1B<br><a href="#">Entrez</a> ,<br><a href="#">Source</a>  | cyclin-dependent kinase inhibitor<br>1B (p27, Kip1)                                                         | 3490 | -0.026 | -0.2705 | No |
| 30 | <a href="#">LRIG1</a>   | LRIG1<br><a href="#">Entrez</a> ,<br><a href="#">Source</a>   | leucine-rich repeats and<br>immunoglobulin-like domains 1                                                   | 3496 | -0.026 | -0.2702 | No |
| 31 | <a href="#">ADCY2</a>   | ADCY2<br><a href="#">Entrez</a> ,<br><a href="#">Source</a>   | adenylate cyclase 2 (brain)                                                                                 | 3580 | -0.035 | -0.2787 | No |
| 32 | <a href="#">PRKAR2A</a> | PRKAR2A<br><a href="#">Entrez</a> ,<br><a href="#">Source</a> | protein kinase,<br>cAMP-dependent, regulatory,<br>type II, alpha                                            | 3673 | -0.043 | -0.2879 | No |

|    |                          |                                                                |                                                                   |      |        |         |    |
|----|--------------------------|----------------------------------------------------------------|-------------------------------------------------------------------|------|--------|---------|----|
| 33 | <a href="#">HSP90AA1</a> | HSP90AA1<br><a href="#">Entrez</a> ,<br><a href="#">Source</a> | heat shock protein 90kDa alpha (cytosolic), class A member 1      | 3719 | -0.047 | -0.2916 | No |
| 34 | <a href="#">AP2M1</a>    | AP2M1<br><a href="#">Entrez</a> ,<br><a href="#">Source</a>    | adaptor-related protein complex 2, mu 1 subunit                   | 4116 | -0.081 | -0.3350 | No |
| 35 | <a href="#">ITPR3</a>    | ITPR3<br><a href="#">Entrez</a> ,<br><a href="#">Source</a>    | inositol 1,4,5-triphosphate receptor, type 3                      | 4184 | -0.087 | -0.3398 | No |
| 36 | <a href="#">MAPKAP1</a>  | MAPKAP1<br><a href="#">Entrez</a> ,<br><a href="#">Source</a>  | mitogen-activated protein kinase associated protein 1             | 4506 | -0.114 | -0.3734 | No |
| 37 | <a href="#">MAPK3</a>    | MAPK3<br><a href="#">Entrez</a> ,<br><a href="#">Source</a>    | mitogen-activated protein kinase 3                                | 4509 | -0.114 | -0.3697 | No |
| 38 | <a href="#">CAMK4</a>    | CAMK4<br><a href="#">Entrez</a> ,<br><a href="#">Source</a>    | calcium/calmodulin-dependent protein kinase IV                    | 4574 | -0.119 | -0.3730 | No |
| 39 | <a href="#">CASP9</a>    | CASP9<br><a href="#">Entrez</a> ,<br><a href="#">Source</a>    | caspase 9, apoptosis-related cysteine peptidase                   | 4581 | -0.119 | -0.3696 | No |
| 40 | <a href="#">GRB2</a>     | GRB2<br><a href="#">Entrez</a> ,<br><a href="#">Source</a>     | growth factor receptor-bound protein 2                            | 4744 | -0.134 | -0.3838 | No |
| 41 | <a href="#">SPRY2</a>    | SPRY2<br><a href="#">Entrez</a> ,<br><a href="#">Source</a>    | sprouty homolog 2 (Drosophila)                                    | 4802 | -0.139 | -0.3856 | No |
| 42 | <a href="#">NRAS</a>     | NRAS<br><a href="#">Entrez</a> ,<br><a href="#">Source</a>     | neuroblastoma RAS viral (v-ras) oncogene homolog                  | 4809 | -0.140 | -0.3815 | No |
| 43 | <a href="#">SHC1</a>     | SHC1<br><a href="#">Entrez</a> ,<br><a href="#">Source</a>     | SHC (Src homology 2 domain containing) transforming protein 1     | 5080 | -0.164 | -0.4073 | No |
| 44 | <a href="#">CALM1</a>    | CALM1<br><a href="#">Entrez</a> ,<br><a href="#">Source</a>    | calmodulin 1 (phosphorylase kinase, delta)                        | 5346 | -0.188 | -0.4317 | No |
| 45 | <a href="#">GAB1</a>     | GAB1<br><a href="#">Entrez</a> ,<br><a href="#">Source</a>     | GRB2-associated binding protein 1                                 | 5377 | -0.192 | -0.4286 | No |
| 46 | <a href="#">MAP2K1</a>   | MAP2K1<br><a href="#">Entrez</a> ,<br><a href="#">Source</a>   | mitogen-activated protein kinase kinase 1                         | 5558 | -0.211 | -0.4423 | No |
| 47 | <a href="#">STAM</a>     | STAM<br><a href="#">Entrez</a> ,<br><a href="#">Source</a>     | signal transducing adaptor molecule (SH3 domain and ITAM motif) 1 | 5624 | -0.217 | -0.4423 | No |
| 48 | <a href="#">CREB1</a>    | CREB1<br><a href="#">Entrez</a> ,<br><a href="#">Source</a>    | cAMP responsive element binding protein 1                         | 5833 | -0.238 | -0.4583 | No |
| 49 | <a href="#">PRKCE</a>    | PRKCE<br><a href="#">Entrez</a> ,<br><a href="#">Source</a>    | protein kinase C, epsilon                                         | 5938 | -0.251 | -0.4618 | No |

|    |                         |                                                               |                                                                                    |      |        |         |     |
|----|-------------------------|---------------------------------------------------------------|------------------------------------------------------------------------------------|------|--------|---------|-----|
| 50 | <a href="#">MDM2</a>    | MDM2<br><a href="#">Entrez</a> ,<br><a href="#">Source</a>    | Mdm2, transformed 3T3 cell double minute 2, p53 binding protein (mouse)            | 6102 | -0.269 | -0.4714 | No  |
| 51 | <a href="#">AKT1S1</a>  | AKT1S1<br><a href="#">Entrez</a> ,<br><a href="#">Source</a>  | AKT1 substrate 1 (proline-rich)                                                    | 6312 | -0.294 | -0.4856 | No  |
| 52 | <a href="#">STAM2</a>   | STAM2<br><a href="#">Entrez</a> ,<br><a href="#">Source</a>   | signal transducing adaptor molecule (SH3 domain and ITAM motif) 2                  | 6394 | -0.305 | -0.4845 | No  |
| 53 | <a href="#">PRKAR1B</a> | PRKAR1B<br><a href="#">Entrez</a> ,<br><a href="#">Source</a> | protein kinase, cAMP-dependent, regulatory, type I, beta                           | 6602 | -0.334 | -0.4970 | No  |
| 54 | <a href="#">PRKCA</a>   | PRKCA<br><a href="#">Entrez</a> ,<br><a href="#">Source</a>   | protein kinase C, alpha                                                            | 6631 | -0.341 | -0.4884 | No  |
| 55 | <a href="#">CALM3</a>   | CALM3<br><a href="#">Entrez</a> ,<br><a href="#">Source</a>   | calmodulin 3 (phosphorylase kinase, delta)                                         | 6689 | -0.350 | -0.4829 | No  |
| 56 | <a href="#">PIK3CA</a>  | PIK3CA<br><a href="#">Entrez</a> ,<br><a href="#">Source</a>  | phosphoinositide-3-kinase, catalytic, alpha polypeptide                            | 6801 | -0.370 | -0.4830 | No  |
| 57 | <a href="#">ADAM17</a>  | ADAM17<br><a href="#">Entrez</a> ,<br><a href="#">Source</a>  | ADAM metalloproteinase domain 17 (tumor necrosis factor, alpha, converting enzyme) | 7181 | -0.447 | -0.5117 | Yes |
| 58 | <a href="#">ADRBK1</a>  | ADRBK1<br><a href="#">Entrez</a> ,<br><a href="#">Source</a>  | adrenergic, beta, receptor kinase 1                                                | 7199 | -0.452 | -0.4980 | Yes |
| 59 | <a href="#">ADCY8</a>   | ADCY8<br><a href="#">Entrez</a> ,<br><a href="#">Source</a>   | adenylate cyclase 8 (brain)                                                        | 7224 | -0.457 | -0.4849 | Yes |
| 60 | <a href="#">MAPK1</a>   | MAPK1<br><a href="#">Entrez</a> ,<br><a href="#">Source</a>   | mitogen-activated protein kinase 1                                                 | 7446 | -0.522 | -0.4926 | Yes |
| 61 | <a href="#">ADCY3</a>   | ADCY3<br><a href="#">Entrez</a> ,<br><a href="#">Source</a>   | adenylate cyclase 3                                                                | 7460 | -0.528 | -0.4757 | Yes |
| 62 | <a href="#">SOS1</a>    | SOS1<br><a href="#">Entrez</a> ,<br><a href="#">Source</a>    | son of sevenless homolog 1 (Drosophila)                                            | 7606 | -0.574 | -0.4727 | Yes |
| 63 | <a href="#">CALM2</a>   | CALM2<br><a href="#">Entrez</a> ,<br><a href="#">Source</a>   | calmodulin 2 (phosphorylase kinase, delta)                                         | 7688 | -0.604 | -0.4611 | Yes |
| 64 | <a href="#">PRKAR2B</a> | PRKAR2B<br><a href="#">Entrez</a> ,<br><a href="#">Source</a> | protein kinase, cAMP-dependent, regulatory, type II, beta                          | 7828 | -0.668 | -0.4541 | Yes |
| 65 | <a href="#">SH3KBP1</a> | SH3KBP1<br><a href="#">Entrez</a> ,<br><a href="#">Source</a> | SH3-domain kinase binding protein 1                                                | 7855 | -0.678 | -0.4336 | Yes |
| 66 | <a href="#">AKT1</a>    | AKT1<br><a href="#">Entrez</a> ,<br><a href="#">Source</a>    | v-akt murine thymoma viral oncogene homolog 1                                      | 8115 | -0.817 | -0.4354 | Yes |

|    |                         |                                                               |                                                                                            |      |        |         |     |
|----|-------------------------|---------------------------------------------------------------|--------------------------------------------------------------------------------------------|------|--------|---------|-----|
| 67 | <a href="#">AKT2</a>    | AKT2<br><a href="#">Entrez</a> ,<br><a href="#">Source</a>    | v-akt murine thymoma viral oncogene homolog 2                                              | 8121 | -0.821 | -0.4074 | Yes |
| 68 | <a href="#">AP2A2</a>   | AP2A2<br><a href="#">Entrez</a> ,<br><a href="#">Source</a>   | adaptor-related protein complex 2, alpha 2 subunit                                         | 8259 | -0.929 | -0.3911 | Yes |
| 69 | <a href="#">PRKAR1A</a> | PRKAR1A<br><a href="#">Entrez</a> ,<br><a href="#">Source</a> | protein kinase, cAMP-dependent, regulatory, type I, alpha (tissue specific extinguisher 1) | 8313 | -0.980 | -0.3632 | Yes |
| 70 | <a href="#">CBL</a>     | CBL<br><a href="#">Entrez</a> ,<br><a href="#">Source</a>     | Cas-Br-M (murine) ecotropic retroviral transforming sequence                               | 8393 | -1.070 | -0.3352 | Yes |
| 71 | <a href="#">YWHAB</a>   | YWHAB<br><a href="#">Entrez</a> ,<br><a href="#">Source</a>   | tyrosine 3-monooxygenase/tryptophan 5-monooxygenase activation protein, beta polypeptide   | 8401 | -1.077 | -0.2985 | Yes |
| 72 | <a href="#">KRAS</a>    | KRAS<br><a href="#">Entrez</a> ,<br><a href="#">Source</a>    | v-Ki-ras2 Kirsten rat sarcoma viral oncogene homolog                                       | 8444 | -1.153 | -0.2633 | Yes |
| 73 | <a href="#">PIK3R1</a>  | PIK3R1<br><a href="#">Entrez</a> ,<br><a href="#">Source</a>  | phosphoinositide-3-kinase, regulatory subunit 1 (p85 alpha)                                | 8463 | -1.179 | -0.2244 | Yes |
| 74 | <a href="#">EPS15</a>   | EPS15<br><a href="#">Entrez</a> ,<br><a href="#">Source</a>   | epidermal growth factor receptor pathway substrate 15                                      | 8469 | -1.184 | -0.1838 | Yes |
| 75 | <a href="#">SH3GL2</a>  | SH3GL2<br><a href="#">Entrez</a> ,<br><a href="#">Source</a>  | SH3-domain GRB2-like 2                                                                     | 8533 | -1.335 | -0.1447 | Yes |
| 76 | <a href="#">AP2B1</a>   | AP2B1<br><a href="#">Entrez</a> ,<br><a href="#">Source</a>   | adaptor-related protein complex 2, beta 1 subunit                                          | 8540 | -1.348 | -0.0985 | Yes |
| 77 | <a href="#">AKT3</a>    | AKT3<br><a href="#">Entrez</a> ,<br><a href="#">Source</a>    | v-akt murine thymoma viral oncogene homolog 3 (protein kinase B, gamma)                    | 8586 | -1.473 | -0.0525 | Yes |
| 78 | <a href="#">PRKACB</a>  | PRKACB<br><a href="#">Entrez</a> ,<br><a href="#">Source</a>  | protein kinase, cAMP-dependent, catalytic, beta                                            | 8614 | -1.677 | 0.0027  | Yes |

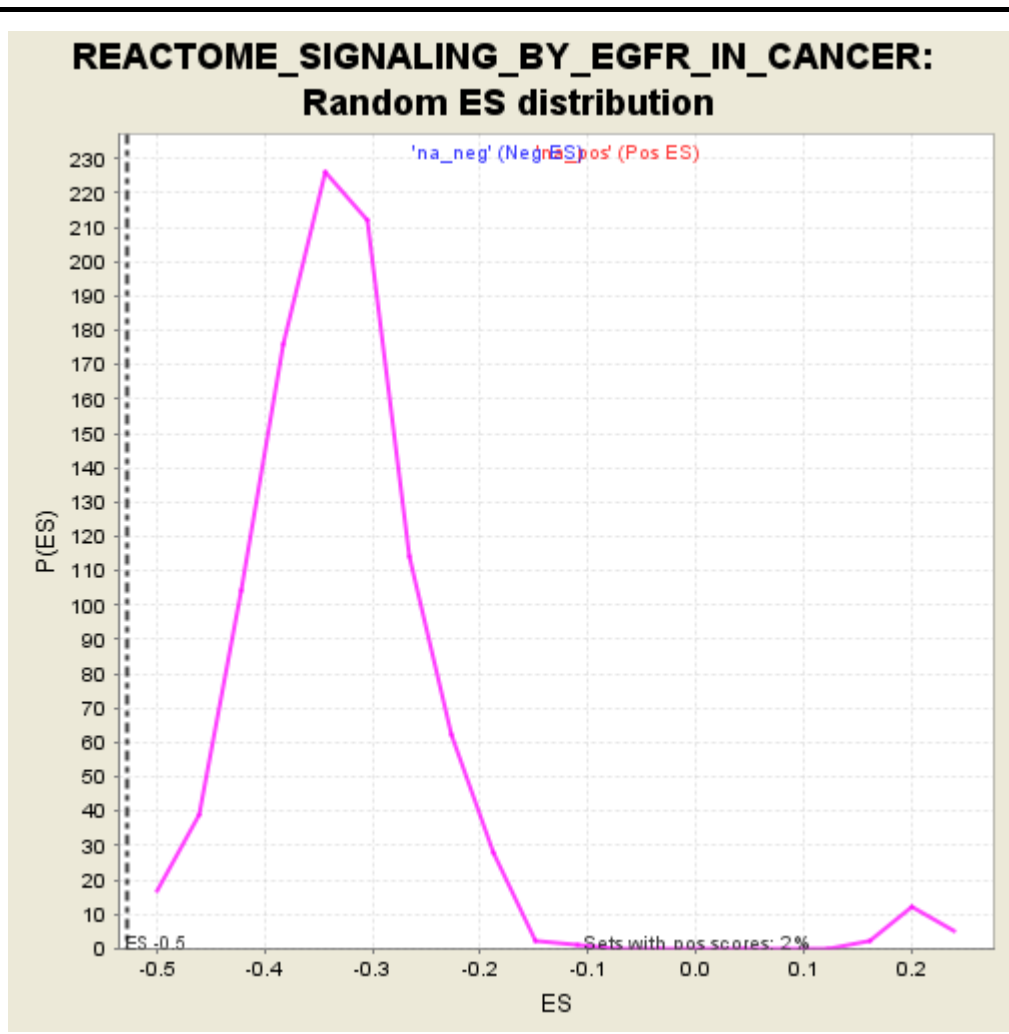

**Fig 2: REACTOME\_SIGNALING\_BY\_EGFR\_IN\_CANCER: Random ES distribution**  
**Gene set null distribution of ES for REACTOME\_SIGNALING\_BY\_EGFR\_IN\_CANCER**
