# Supplementary material for: Progression of pathology in PINK1-deficient mouse brain from splicing via ubiquitination, ER stress, and mitophagy changes to neuroinflammation
Source: Springer Nature journal article supplement (doi:10.1186/s12974-017-0928-0), 2017-08-02

(A) Reactome pathway  
 "Negative regulators of  
 RIG I and MDA5 signaling"

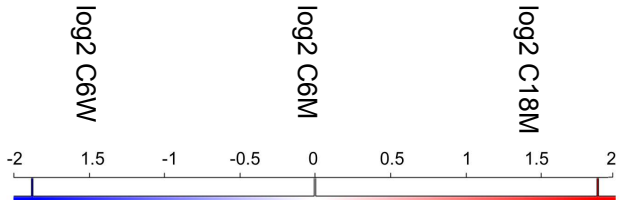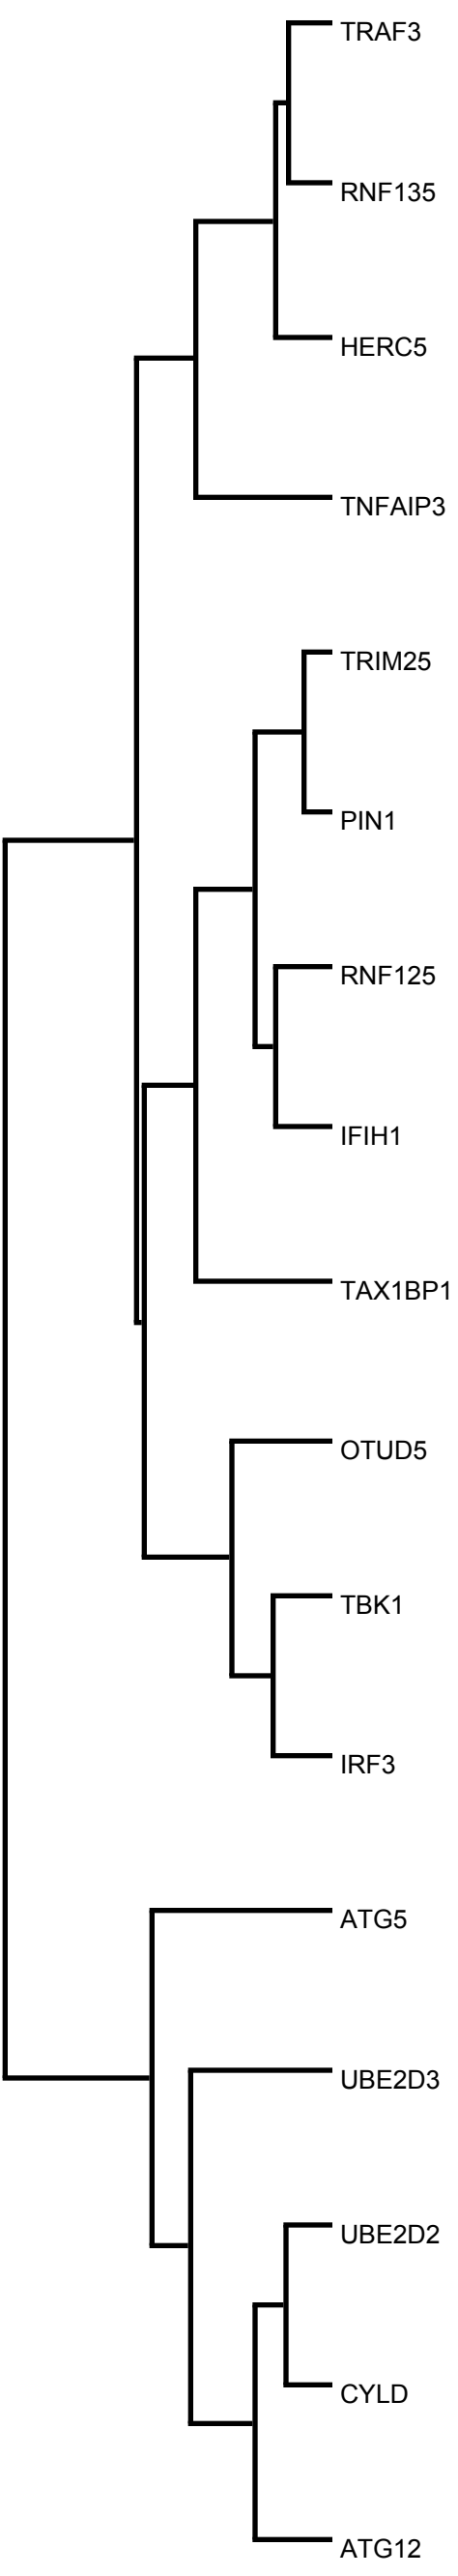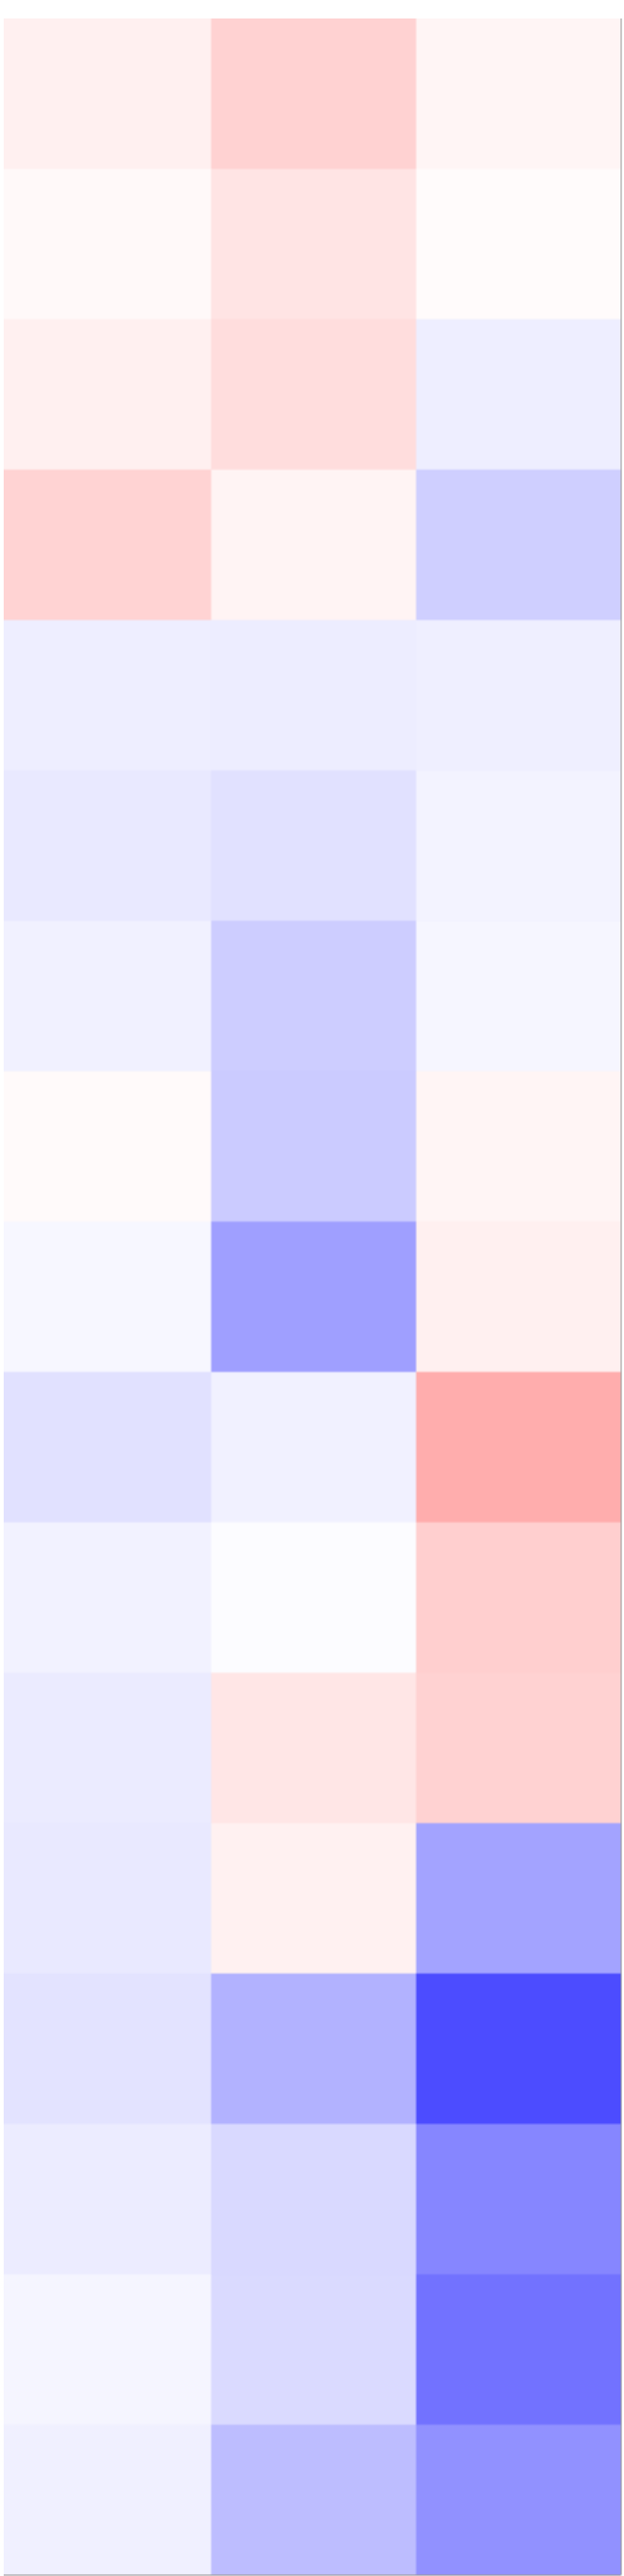

(B) Reactome pathway  
 "Antiviral mechanism by  
 IFN stimulated genes"

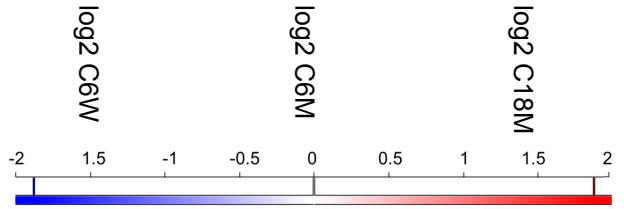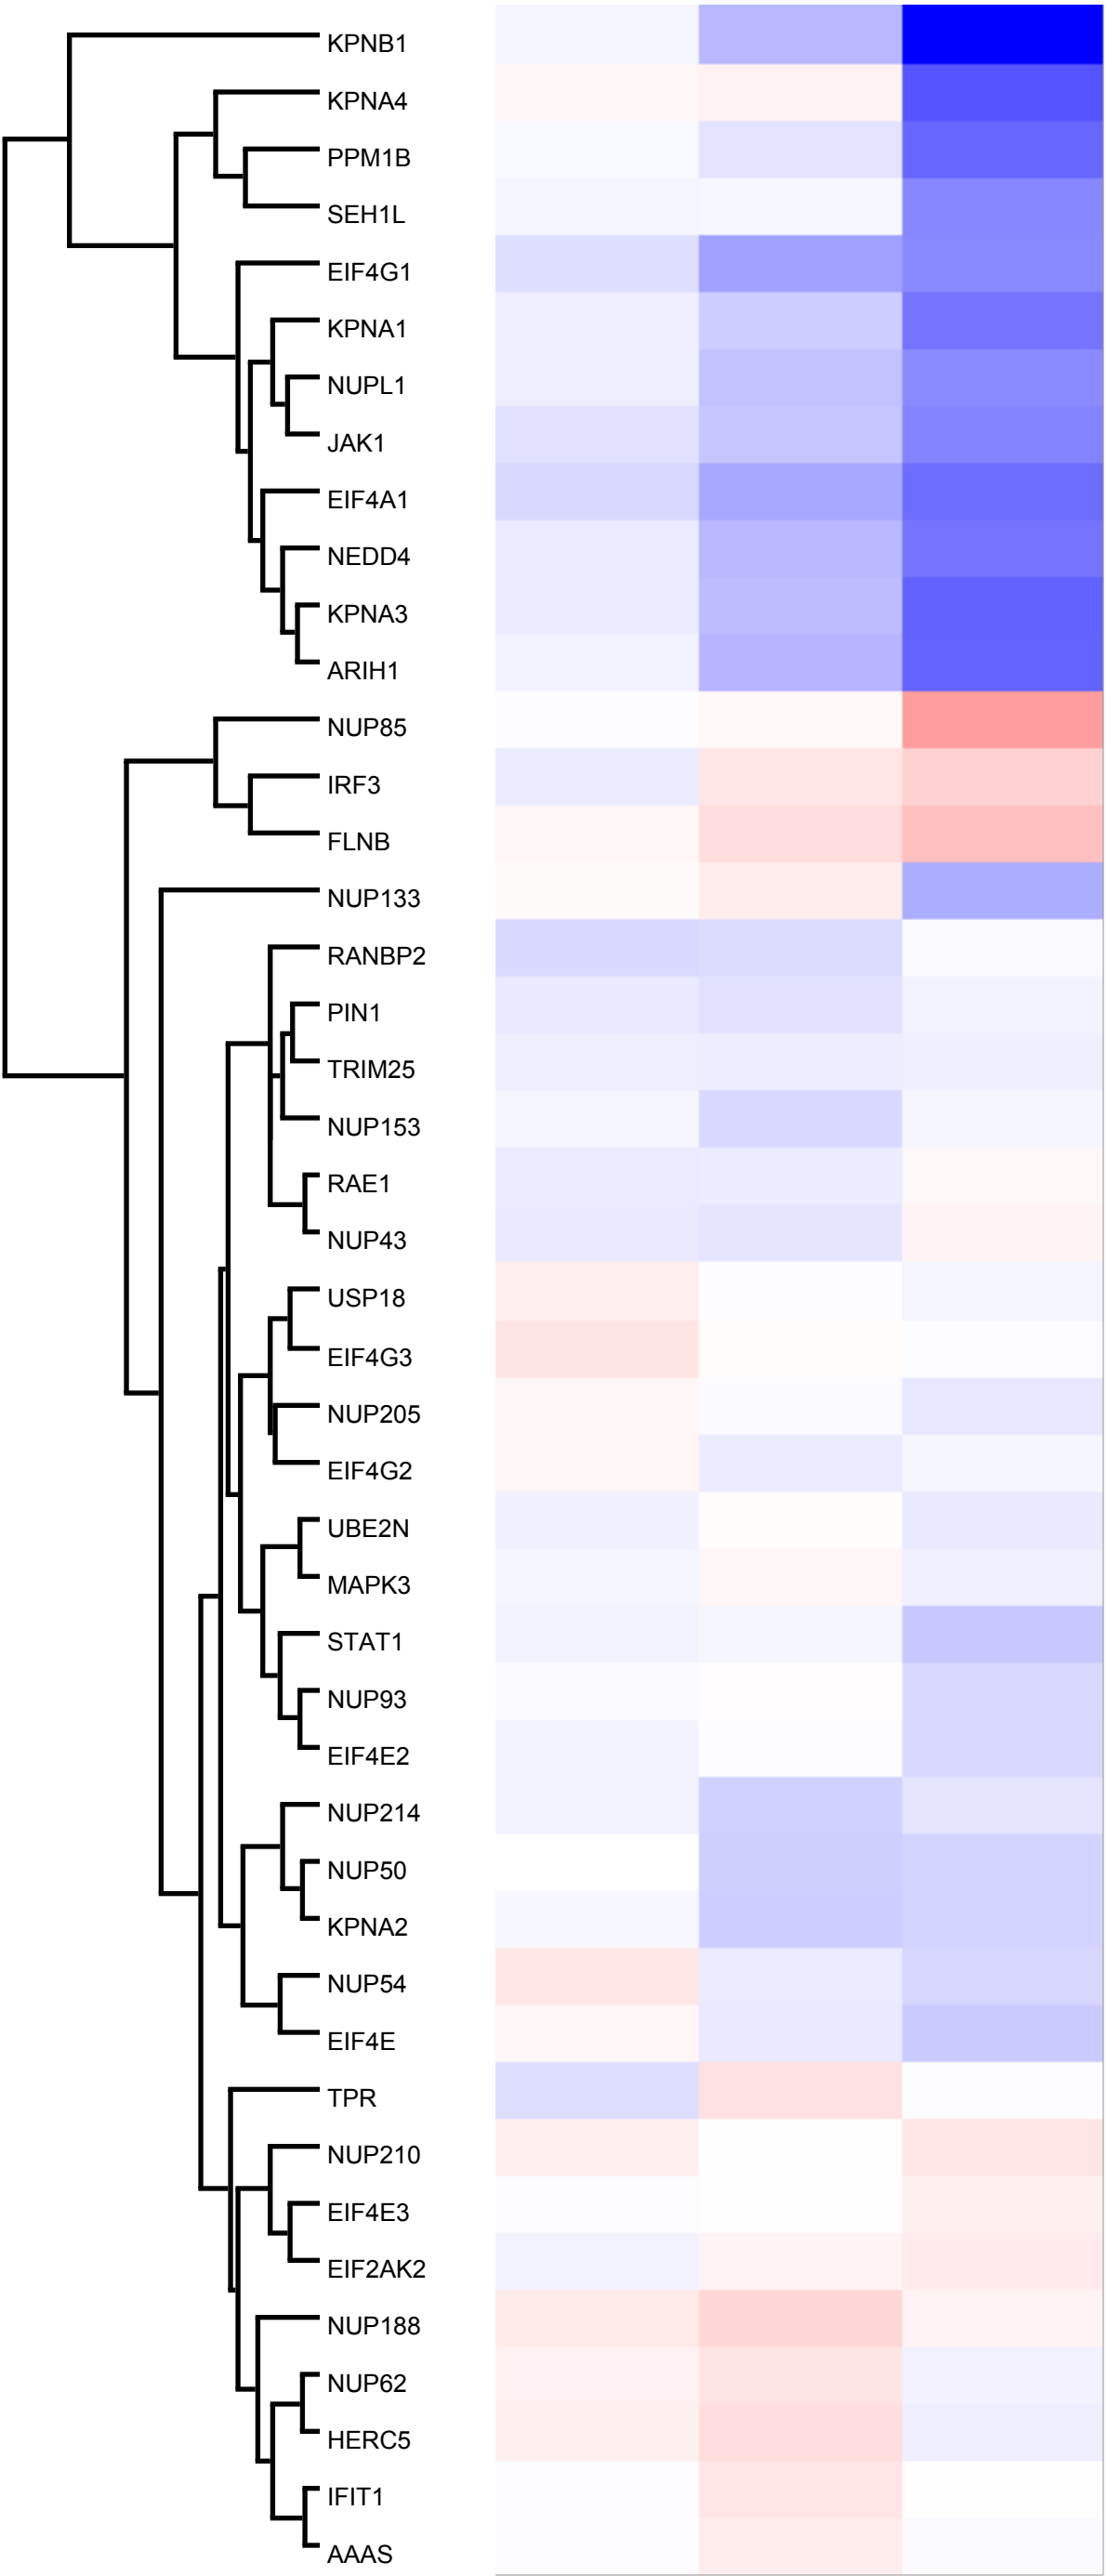

(C) Reactome pathway  
 "Antigen processing  
 ubiquitination  
 proteasome degradation"

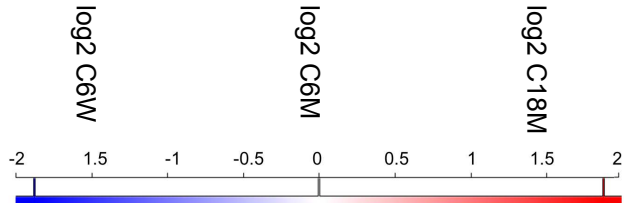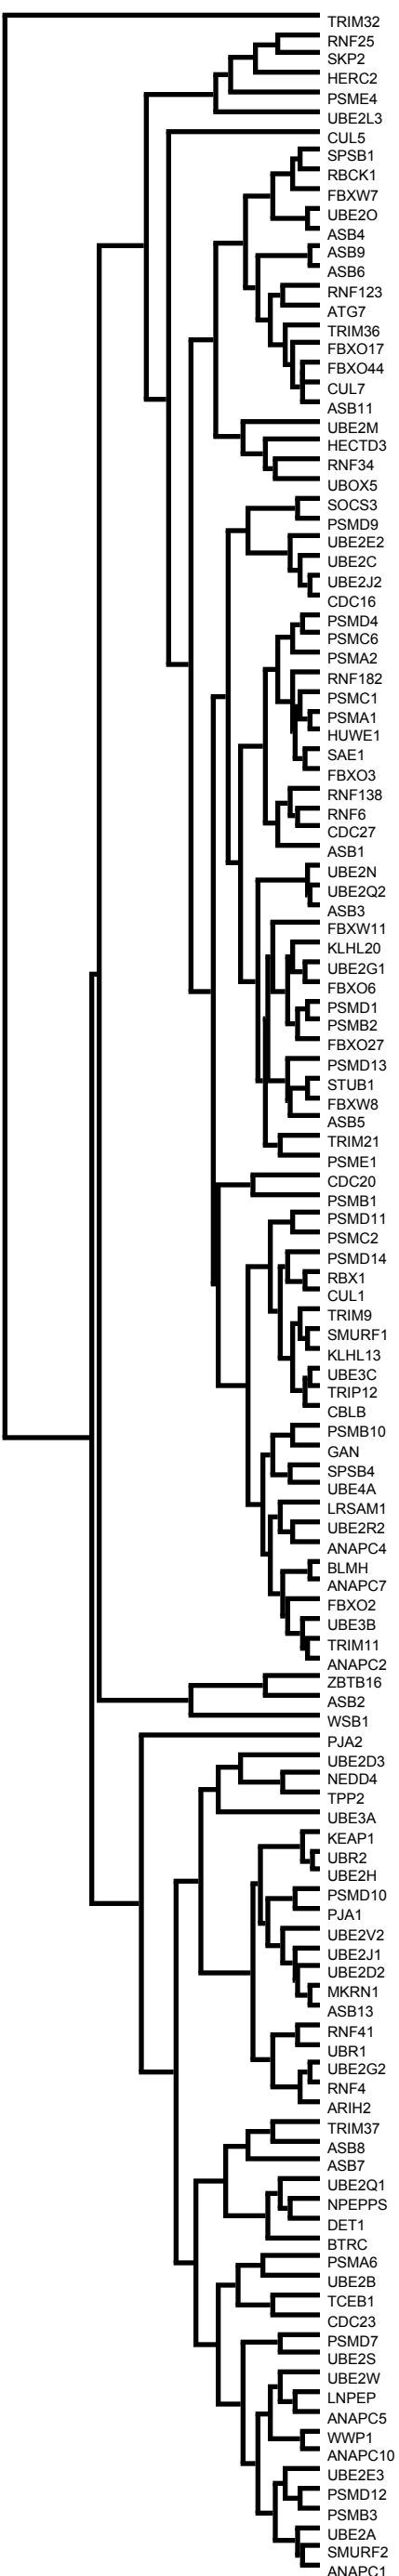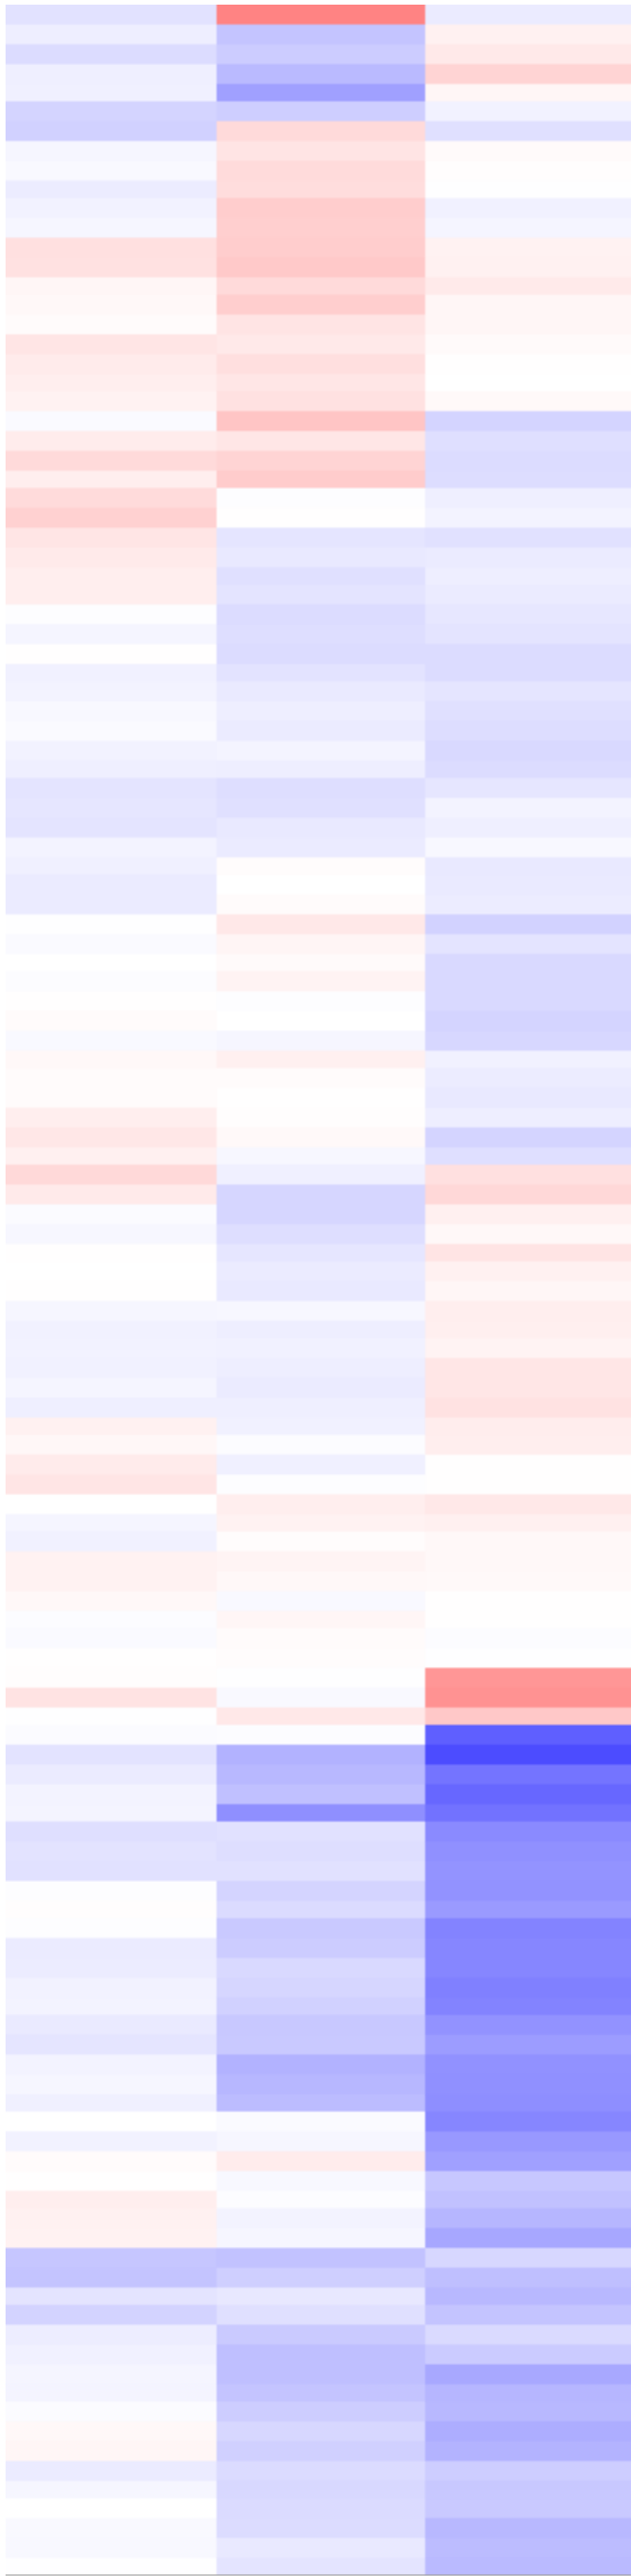

(D) Reactome pathway  
 "Activation of chaperone genes  
 by Xbp1s"

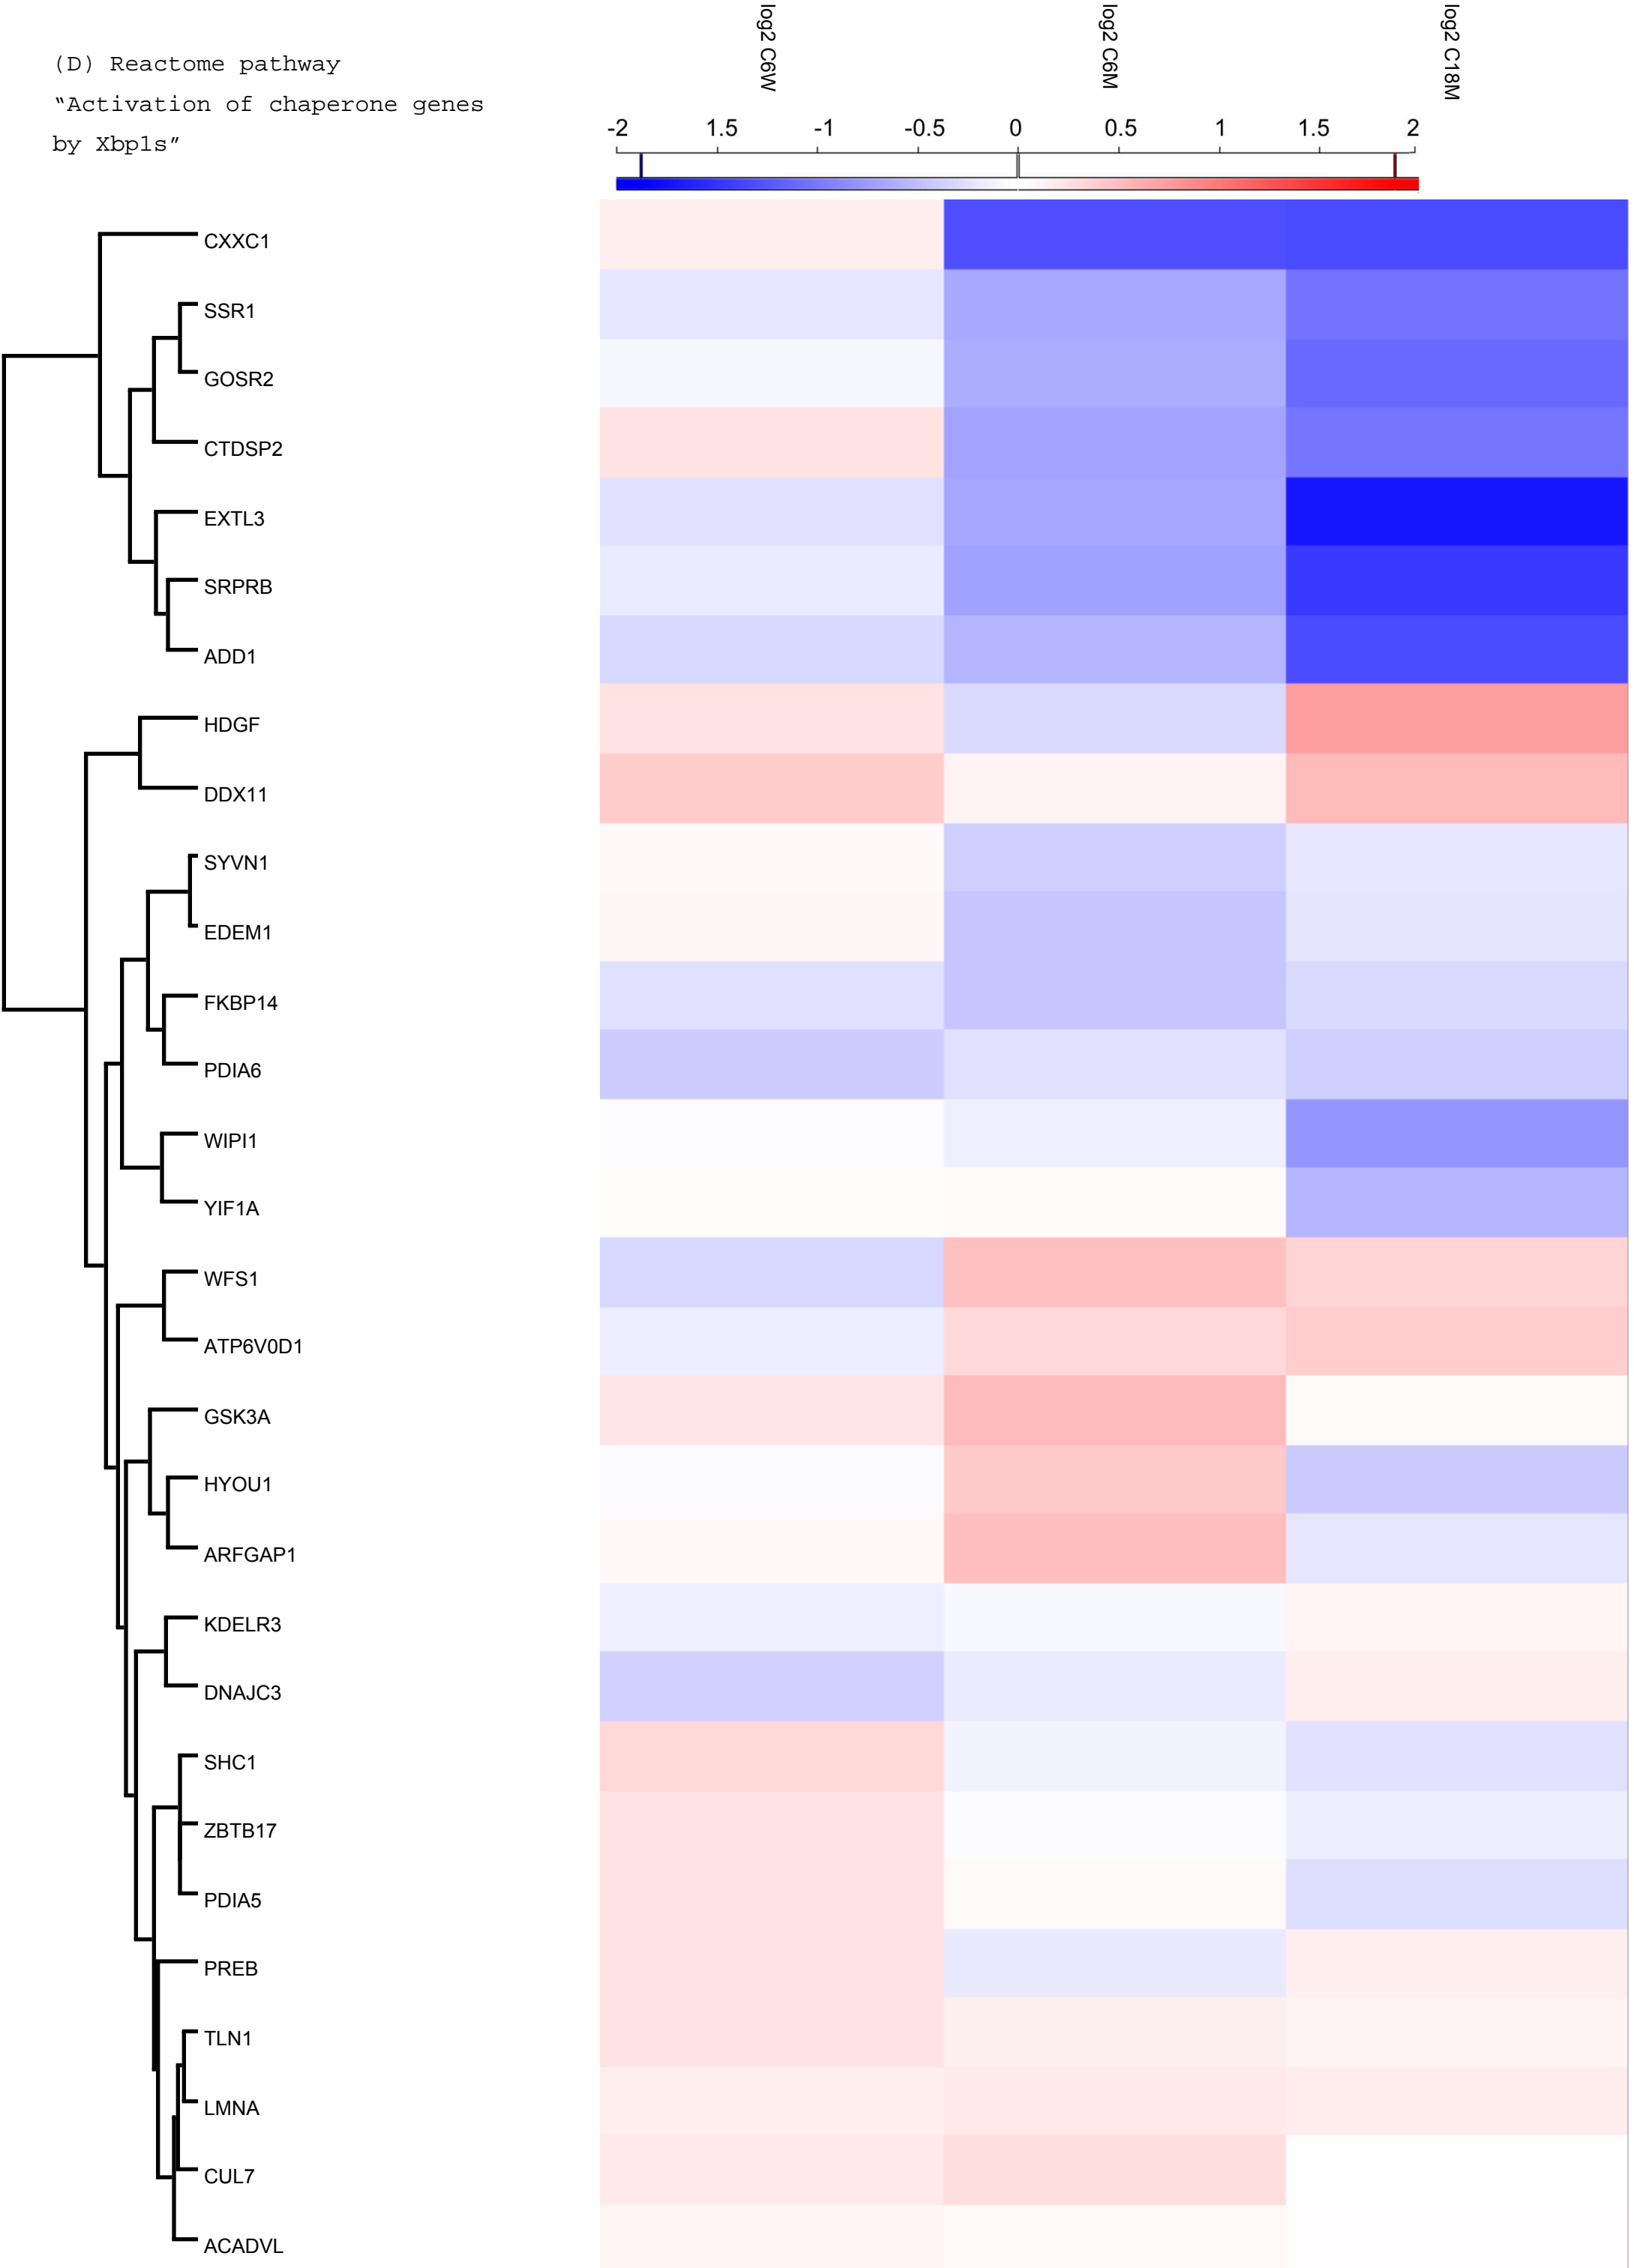

Supplement: MOESM7 [file 12974_2017_928_MOESM7_ESM.pdf]
