# Supplementary material for: Progression of pathology in PINK1-deficient mouse brain from splicing via ubiquitination, ER stress, and mitophagy changes to neuroinflammation
Source: Springer Nature journal article supplement (doi:10.1186/s12974-017-0928-0), 2017-08-02
Supplement: MOESM9 [file 12974_2017_928_MOESM9_ESM.pdf]

| Probe Set ID | Gene Symbol           | Chromosome Number | pvalue ([wt] Vs [ko]) | FCAbsolute ([wt] Vs [ko]) | Authors' Comments                                                                                                                                                                                                                                       |
|--------------|-----------------------|-------------------|-----------------------|---------------------------|---------------------------------------------------------------------------------------------------------------------------------------------------------------------------------------------------------------------------------------------------------|
| 1451148_at   | Pink1                 | chr4              | 6,97E-05              | 48,452423                 | KO                                                                                                                                                                                                                                                      |
| 1441937_s_at | Pink1                 | chr4              | 9,74E-05              | 45,783978                 | KO                                                                                                                                                                                                                                                      |
| 1424524_at   | Dram1 - 1200002N14Rik | chr10             | 1,37E-04              | 1,7332038                 | Dram1 DNA-damage regulated autophagy modulator 1; implicated in PARK2 variants of Parkinson's disease (Tatura-R 2016 Parkinsonism Relat Disord)                                                                                                         |
| 1452730_at   | 1110033J19Rik         | chr6              | 2,23E-04              | 2,0384903                 | Rps4l ribosomal protein S4-like                                                                                                                                                                                                                         |
| 1422616_s_at | Wdr54                 | chr6              | 5,54E-04              | 1,7951214                 |                                                                                                                                                                                                                                                         |
| 1429118_a_at | Gin1 - 4930429M06Rik  | chr1              | 6,74E-04              | 1,78669                   | Gin1 gypsy retrotransposon integrase 1                                                                                                                                                                                                                  |
| 1436359_at   | Ret                   | chr6              | 9,93E-04              | 1,7081106                 | PINK1/Parkin interactions with RET: Klein-P 2014 EMBO J for PINK1, Meka-DP 2015 J Clin Invest for Parkin                                                                                                                                                |
| 1436462_at   |                       |                   | 0,001027774           | 1,9132199                 |                                                                                                                                                                                                                                                         |
| 1428991_at   | Hrasls                | chr16             | 0,001528755           | 2,8665628                 |                                                                                                                                                                                                                                                         |
| 1448239_at   | Hmox1                 | chr8              | 0,001866731           | 1,7795864                 | cleaves the heme ring and liberates iron; innate immunity factor; crucial for mitochondrial quality control; implicated in Parkinson's disease (Schipper-HM 2015 Int J Mol Sci; Wegliel-B 2015 Free Radic Biol Med; Hull-TD 2016)                       |
| 1454714_x_at | Phgdh - LOC546010     | chr7              | 0,002202771           | 124,833885                |                                                                                                                                                                                                                                                         |
| 1427730_a_at | Zfp148                | chr16             | 0,003365849           | 1,630802                  |                                                                                                                                                                                                                                                         |
| 1424257_at   | Cdk7                  | chr13             | 0,004854731           | 2,1732583                 |                                                                                                                                                                                                                                                         |
| 1432443_at   | 1700021P22Rik         | chr7              | 0,004899022           | 1,543802                  | Golgi-associated Rab2B interactor-like 5                                                                                                                                                                                                                |
| 1418172_at   | Hebp1                 | chr6              | 0,004931319           | 1,8345174                 | heme binding protein 1, includes a natural chemoattractant peptide of 21 amino acids at the N-terminus, which is a natural ligand for formyl peptide receptor-like receptor 3 (FPRL3) and promotes calcium mobilization and chemotaxis (Devosse-T 2011) |
| 1456490_at   | Cdk2ap2               | chr19             | 0,00539204            | 1,8029057                 |                                                                                                                                                                                                                                                         |
| 1456565_s_at | Map3k12               | chr15             | 0,005866624           | 1,8616774                 |                                                                                                                                                                                                                                                         |
| 1451680_at   | Srxn1                 | chr2              | 0,006438374           | 1,5373628                 | oxidative stress resistance                                                                                                                                                                                                                             |
| 1426766_at   | 6330403K07Rik         | chr11             | 0,00683536            | 1,8228908                 | UGS148, involved in intracellular sorting, trafficking, exocytosis and membrane insertion                                                                                                                                                               |
| 1417602_at   | Per2                  | chr1              | 0,006929158           | 1,5086643                 |                                                                                                                                                                                                                                                         |
| 1434735_at   | Hlf                   | chr11             | 0,008153346           | 1,5317298                 | upstream of HIF1alpha                                                                                                                                                                                                                                   |
| 1429241_at   | Npal3                 | chr4              | 0,008624177           | 2,5109963                 |                                                                                                                                                                                                                                                         |
| 1424938_at   | Steap1                | chr5              | 0,009155522           | 1,9902649                 | Metalloreductase that has the ability to reduce both Fe(3+) to Fe(2+) and Cu(2+) to Cu(1+). Uses NAD(+) as acceptor                                                                                                                                     |
| 1432372_a_at | Spr                   | chr6              | 0,009455642           | 1,6994692                 | Dopa-responsive dystonia and Parkinsonism                                                                                                                                                                                                               |
| 1432217_a_at | 1700019F09Rik         | chr11             | 0,009735948           | 2,368865                  | WDRPUH, with WD40 repeat, cilia- and flagella-associated protein 52                                                                                                                                                                                     |
| 1431708_a_at | Tia1                  | chr6              | 0,010277364           | 4,357368                  | starvation regulator at stress granules                                                                                                                                                                                                                 |
| 1430837_a_at | Mbd1                  | chr18             | 0,010326727           | 3,3089137                 | Regulator Of Fibroblast Growth Factor 2 (FGF-2) Transcription                                                                                                                                                                                           |
| 1437753_at   |                       |                   | 0,010944241           | 1,5809302                 |                                                                                                                                                                                                                                                         |
| 1436045_at   | Tsga10                | chr1              | 0,010945085           | 1,9227682                 | prevents nuclear localization of HIF1alpha                                                                                                                                                                                                              |
| 1456256_at   | Eif5                  | chr12             | 0,011162037           | 1,6740198                 |                                                                                                                                                                                                                                                         |
| 1456041_at   | Snx16                 | chr3              | 0,013978108           | 1,5146377                 | promotes degradation of EGFR after stimulation, intracellular transport of vesicular stomatitis virus nucleocapsids (Le Blanc-I 2005 Nat Cell Biol)                                                                                                     |
| 1421009_at   | Rsad2                 | chr12             | 0,014488435           | 1,7024405                 | Interferon-inducible iron-sulfur (4FE-4S) cluster-binding antiviral protein (Chen-WQ 2015 Dev Comp Immunol)                                                                                                                                             |
| 1442165_at   | Armc9                 | chr1              | 0,015487114           | 1,840675                  |                                                                                                                                                                                                                                                         |
| 1449862_a_at | Pi4k2b                | chr5              | 0,016058756           | 1,8411335                 |                                                                                                                                                                                                                                                         |
| 1422256_at   | Sstr2                 | chr11             | 0,017115435           | 1,7433645                 | mediates negative regulation of insulin receptor signaling                                                                                                                                                                                              |
| 1452992_at   | Cdc26                 | chr4              | 0,017132841           | 1,52979                   | Component of APC/C complex, a cell cycle-regulated E3 ubiquitin ligase                                                                                                                                                                                  |
| 1455279_at   | Gm1060                | chr5              | 0,018250158           | 2,1300688                 |                                                                                                                                                                                                                                                         |
| 1432189_a_at | Sox5                  | chr6              | 0,01899819            | 1,6616669                 |                                                                                                                                                                                                                                                         |
| 1460227_at   | Timp1                 | chrX              | 0,019330187           | 1,5041677                 | inducible by cytokines and toll-like receptors (Li-L 2014 Mol Cell Biochem; Swanberg-M 2006 Neurobiol Dis)                                                                                                                                              |
| 1450432_s_at | Mus81                 | chr19             | 0,019486142           | 1,5867147                 | Up-regulated in cells treated with agents that damage DNA or block replication                                                                                                                                                                          |
| 1434894_at   | 3110050K21Rik         | chr14             | 0,019493764           | 1,6834528                 | Zc3h13 zinc finger CCCH type containing 13                                                                                                                                                                                                              |
| 1436519_a_at | 1110057K04Rik         | chr12             | 0,019745862           | 1,5311022                 | Ldah lipid droplet associated hydrolase                                                                                                                                                                                                                 |
| 1423667_at   | Mat2a                 | chr6              | 0,020037618           | 1,6003249                 | hypoxia induces DNA demethylation through Mat2a upregulation                                                                                                                                                                                            |
| 1456471_x_at | LOC224870 - Phgdh     | chr3              | 0,021097671           | 22,651728                 |                                                                                                                                                                                                                                                         |
| 1427524_a_at | 4930548G07Rik         | chr14             | 0,021225194           | 1,5558258                 | Mphosph8 M-phase phosphoprotein 8                                                                                                                                                                                                                       |
| 1451621_at   | 5830417C01Rik         | chr1              | 0,021344382           | 1,6901493                 | Desi2 desumoylating isopeptidase 2                                                                                                                                                                                                                      |
| 1423500_a_at | Sox5                  | chr6              | 0,022289125           | 1,5124487                 |                                                                                                                                                                                                                                                         |
| 1455064_at   | Rab36                 | chr10             | 0,02343256            | 1,7044375                 |                                                                                                                                                                                                                                                         |
| 1457264_at   | Phf2011               | chr15             | 0,023548324           | 1,7924849                 | influences DNA cytosine methylation via DNMT1 (Estève-PO 2014 J Biol Chem)                                                                                                                                                                              |
| 1421752_a_at | Serpinb5              | chr1              | 0,023890194           | 1,5496114                 | tumor suppressor, interactor of interferon regulatory factor 6                                                                                                                                                                                          |
| 1422725_at   | Mak                   | chr13             | 0,024152678           | 2,2695055                 |                                                                                                                                                                                                                                                         |

|              |               |       |             |           |                                                                                                                                                                                                               |
|--------------|---------------|-------|-------------|-----------|---------------------------------------------------------------------------------------------------------------------------------------------------------------------------------------------------------------|
| 1424253_at   | 1810073G14Rik | chr11 | 0,024282003 | 1,6238674 |                                                                                                                                                                                                               |
| 1421441_at   | Angpt1        | chr15 | 0,024920227 | 1,5130731 |                                                                                                                                                                                                               |
| 1435688_at   |               |       | 0,02493906  | 2,226304  |                                                                                                                                                                                                               |
| 1460006_at   | Atbf1         | chr8  | 0,02682056  | 1,7013267 |                                                                                                                                                                                                               |
| 1417988_at   | Resp18        | chr1  | 0,0270382   | 2,6684775 | RESP18 is involved in the cytotoxicity of dopaminergic neurotoxins in MN9D cells, overexpression aggravated cell death induced by MPP+ and 6OH-DA                                                             |
| 1435036_at   | A530050D06Rik | chr12 | 0,027661307 | 1,7793468 | Aspg asparaginase homolog                                                                                                                                                                                     |
| 1425191_at   | 9430098E02Rik | chr8  | 0,029728629 | 1,5816218 | Ocel1 occludin/ELL domain containing 1, NRF1 target like PINK1                                                                                                                                                |
| 1419749_at   | Dnmt2         | chr2  | 0,029773517 | 1,5979004 | cytosine methylation of RNA and DNA; role in stress granules represents a defense mechanism against viral infection (Schaefer-M 2010 Genes Dev)                                                               |
| 1427133_s_at | LOC545422     | chr2  | 0,030742085 | 1,5075078 |                                                                                                                                                                                                               |
| 1434510_at   | Papss2        | chr19 | 0,030916411 | 1,6075696 | sulfation activation pathway; expression regulated by lipopolysaccharide treatment; neighbor gene of PTEN (Kim-MS 2004 Am J Physiol Endocrinol Metab; Marbiah-MM 2014 EMBO J; Liu-Z 2016 Free Radic Biol Med) |
| 1436058_at   | Rsad2         | chr12 | 0,03116718  | 1,7421006 | Interferon-inducible iron-sulfur (4FE-4S) cluster-binding antiviral protein (Seo-JY 2011 Cell Host Microbe; Chen-WQ 2015 Dev Comp Immunol)                                                                    |
| 1421141_a_at | Foxp1         | chr6  | 0,031862367 | 1,7421789 | modulated by alpha-synuclein, responsible for DAergic midbrain neurons                                                                                                                                        |
| 1431630_a_at | Klf3          | chr5  | 0,032135975 | 1,8721375 | Binds to the CACCC box of erythroid cell-expressed genes, regulated by Interleukin-17, regulates inflammatory Galectin-3 (Ahmed-M 2013 Cytokine; Knights-AJ 2016 J Biol Chem)                                 |
| 1455260_at   | A830039H10Rik | chr5  | 0,032324962 | 1,5346051 |                                                                                                                                                                                                               |
| 1429380_at   | Rgs12         | chr5  | 0,03331049  | 1,7056541 | Ras/Raf/Mek-scaffold in nerve-growth-factor-mediated differentiation                                                                                                                                          |
| 1434929_at   | BC035044      | chr6  | 0,033569746 | 1,6217262 |                                                                                                                                                                                                               |
| 1453470_a_at | Gna13         | chr11 | 0,033591755 | 1,5725456 | interacts with RhoGEF                                                                                                                                                                                         |
| 1426631_at   | C330017115Rik | chr5  | 0,03389128  | 1,5001372 | Pus7 pseudouridylylase synthase 7 homolog                                                                                                                                                                     |
| 1441306_at   | 6820408C15Rik | chr2  | 0,03397604  | 2,9458206 |                                                                                                                                                                                                               |
| 1429588_at   | 2810474O19Rik | chr6  | 0,034188952 | 1,9378095 |                                                                                                                                                                                                               |
| 1452595_at   | Adams4        | chr1  | 0,03418908  | 1,8432097 | induced by interleukin-1, repressed by hyaluronan (Bondeson-J 2007 J Rheumatol; Yaikasli-KO 2009 Mol Cell Biochem; Yatabe-T 2009 Ann Rheum Dis)                                                               |
| 1435642_at   | 9630019K15Rik | chr17 | 0,034402315 | 2,4065404 | Prr18, proline rich 18                                                                                                                                                                                        |
| 1449390_at   | Gpatc4        | chr3  | 0,035351932 | 1,5143058 |                                                                                                                                                                                                               |
| 1423997_at   | Csde1         | chr3  | 0,03547374  | 1,7396368 | synonymous to UNR; internal initiation of translation of virus RNA; regulation of c-Fos RNA (Grosset-C 2000 Cell; Boussadia-O 2003 J Virol)                                                                   |
| 1426114_at   | Hnrpab        | chr11 | 0,03590401  | 1,5990748 | binds single-stranded RNA                                                                                                                                                                                     |
| 1439582_at   | Macf1         | chr4  | 0,03621851  | 1,9254653 | Wnt signaling pathway of wound healing                                                                                                                                                                        |
| 1434315_at   | Npal3         | chr4  | 0,036787618 | 1,8032653 |                                                                                                                                                                                                               |
| 1452139_at   | Slc35c1       | chr2  | 0,037324883 | 1,6265639 | GDP-fucose import from the cytoplasm into the Golgi lumen                                                                                                                                                     |
| 1422919_at   | Hrasls        | chr16 | 0,03812369  | 1,9519243 |                                                                                                                                                                                                               |
| 1435529_at   | Ifit3         | chr19 | 0,038313616 | 1,5106372 | enhances MAVS-mediated host antiviral responses, as adaptor leading to activation of TNFR-associated factor family member-associated NF-kB activator-binding kinase 1 (TBK1) (Liu-XY 2011 J Immunol)          |
| 1419069_at   | Rabgef1       | chr5  | 0,03857006  | 1,606571  |                                                                                                                                                                                                               |
| 1427942_at   | Pamci         | chr10 | 0,03936968  | 1,8311158 | endosomal RASSF9                                                                                                                                                                                              |
| 1422253_at   | Col10a1       | chr10 | 0,039610066 | 2,9920065 |                                                                                                                                                                                                               |
| 1421321_a_at | Net1          | chr13 | 0,040916238 | 1,6481261 | Rho-GEF Proto-Oncogene P65, induced by TGFB1, in JNK pathway                                                                                                                                                  |
| 1434868_at   | 4933431E20Rik | chr3  | 0,041321814 | 1,808017  |                                                                                                                                                                                                               |
| 1429566_a_at | Hipk2         | chr6  | 0,041372046 | 1,5986654 | response to hypoxia by acting as a transcriptional co-suppressor of HIF1A, involved in p53/TP53-mediated cellular apoptosis                                                                                   |
| 1448566_at   | Slc40a1       | chr1  | 0,041440252 | 1,9830165 | iron-regulated transporter; regulated by toll-like receptors and lipopolysaccharides; dysregulated in Parkinson's disease (Layoun-A 2012 Am J Pathol; Rhodes-SL 2014 Neurobiol Dis)                           |
| 1417481_at   | Ramp1         | chr1  | 0,0420383   | 1,9016539 |                                                                                                                                                                                                               |
| 1425349_a_at | Myef2         | chr2  | 0,042601384 | 2,0290363 |                                                                                                                                                                                                               |
| 1428751_at   | Pacrg         | chr17 | 0,044120647 | 1,5269926 |                                                                                                                                                                                                               |
| 1424966_at   | Tmem40        | chr6  | 0,044930708 | 1,5544113 |                                                                                                                                                                                                               |
| 1448417_at   | Ninj1         | chr13 | 0,045032132 | 1,5059755 | upregulated after nerve injury                                                                                                                                                                                |
| 1419420_at   | St6galnac5    | chr3  | 0,0450764   | 1,626536  |                                                                                                                                                                                                               |
| 1422033_a_at | Cnfr          | chr19 | 0,045293726 | 1,5433439 | Liu-J 2010 Proteomics, von Bohlen und Halbach-O 2009 Adv Exp Med Biol                                                                                                                                         |
| 1429217_at   | Zfp655        | chr5  | 0,045893386 | 1,7568653 |                                                                                                                                                                                                               |
| 1428599_at   | 2410012C07Rik | chr7  | 0,04663539  | 1,507578  |                                                                                                                                                                                                               |
| 1435069_at   | BC064078      | chr6  | 0,046687637 | 1,6245518 |                                                                                                                                                                                                               |
| 1455147_at   |               |       | 0,04702163  | 1,697666  |                                                                                                                                                                                                               |
| 1424098_at   | Elovl7        | chr13 | 0,04778445  | 1,5016968 | Elongation Of Very Long Chain Fatty Acids                                                                                                                                                                     |

|              |               |       |             |           |                                                                                   |
|--------------|---------------|-------|-------------|-----------|-----------------------------------------------------------------------------------|
| 1417618_at   | Itih2         | chr2  | 0,048334748 | 2,5506465 |                                                                                   |
| 1445404_at   | Kif27         | chr13 | 0,04843511  | 1,5450956 |                                                                                   |
| 1440147_at   | Lgi2          | chr5  | 0,0489945   | 2,0282414 | phenotype epilepsy                                                                |
| 1429059_s_at | 1110004B13Rik | chr11 | 0,049165368 | 1,7148007 | Tmem107 transmembrane protein 107                                                 |
| 1453734_at   | Atrx          | chrX  | 0,049633674 | 1,5523869 | PML nuclear body component involved in antiviral defense (Scherer-M 2016 J Virol) |
| 1427944_at   | C1qdc1        | chr6  | 0,049639553 | 1,6935508 |                                                                                   |

**Color coding:**

Pink1-KO

trophic factors

already implicated in neurodegenerative processes

DNA/RNA quality control

hypoxia/antioxidant factors

autophago-lysosomal modulator

vesicle trafficking

anti-microbial state factors
