# Supplementary material for: Progression of pathology in PINK1-deficient mouse brain from splicing via ubiquitination, ER stress, and mitophagy changes to neuroinflammation
Source: J Neuroinflammation. 2017 Aug 2;14:154. doi: 10.1186/s12974-017-0928-0 (PMC5541666; doi:10.1186/s12974-017-0928-0)
Supplement: Supplementary file 1 — Global transcriptome profile of Pink1 −/− brain regions (C = cerebellum, M = midbrain, S = striatum) across the mouse lifespan (6 W = 6 weeks, 24 W = 24 weeks = 6 months, 18 M = 18 months), showing all expression dysregulations which were consistent in all regions at all ages with significance (multiple testing adjusted p value <0.05). ID identifies the Affymetrix microarray chip probe. AveExpr quantifies the average expression strength among the tissues and ages for each transcript. F, P value, and AdjPvalue refer to statistical values. For each column, 3 mutant versus 3 WT tissues were analyzed to represent a specific brain region and age. (XLS 27 kb) [file 12974_2017_928_MOESM1_ESM.xls]

## Sheet: Tabelle1
ID	Gene Symbol	Gene Title	AveExpr	F	P.Value	Adj.P.Val	Log2 Expression changes (M-values)
							C.06w.KO vs C.06w.WT	C.24w.KO vs C.24w.WT	C.18m.KO vs C.18m.WT	M.06w.KO vs M.06w.WT	M.24w.KO vs M.24w.WT	M.18m.KO vs M.18m.WT	S.06w.KO vs S.06w.WT	S.24w.KO vs S.24w.WT	S.18m.KO vs S.18m.WT
1451148_at	Pink1	PTEN induced putative kinase 1	9.41519	1110.02	2.95209e-58	6.64751e-54	-3.71899	-3.82584	-4.2968	-3.7277	-3.89891	-3.97658	-3.68139	-4.16065	-4.3323
1441937_s_at	Pink1	PTEN induced putative kinase 1	8.81921	670.792	1.35924e-52	1.53037e-48	-4.08546	-4.29969	-4.57475	-3.96609	-4.09425	-4.091	-4.07959	-4.5803	-4.72328
1459828_at	Srrm1	Serine/arginine repetitive matrix 1	5.60709	35.723	7.17791e-21	2.30903e-17	1.39707	1.06354	1.44582	0.826833	0.635561	0.806423	0.788171	0.950761	1.23241
1429232_at	Hnrnpr	2610528B01Rik; RIKEN cDNA 2610528B01 gene	6.7072	31.6573	1.0906e-19	2.45582e-16	0.66621	0.801764	0.941382	0.815411	0.731821	1.15947	1.07599	0.634023	0.669841
1420935_a_at	Srrm1	serine/arginine repetitive matrix 1	8.58611	31.2204	1.48693e-19	3.04387e-16	1.30594	0.744903	0.999641	0.403627	1.19285	0.482567	1.06622	0.602699	0.537348
1418526_at	Srsf10	FUS interacting protein (serine-arginine rich) 1, Fusip1	7.53622	19.7634	2.68565e-15	3.55738e-12	-0.681274	-0.868299	-0.896386	-0.492119	-0.555024	-0.460458	-0.790341	-0.598451	-1.03195
1434540_a_at	Clta	clathrin, light polypeptide (Lca)	9.4864	10.2873	5.77973e-10	3.02669e-07	-2.41645	-0.927203	-1.94258	-2.7412	-1.39117	-1.48133	-2.49969	-1.51436	-1.51415
1439640_at	Hnrnpr	Gm17388; 16 days neonate thymus cDNA, RIKEN full-length enriched library, clone:A130046K21 product:hypothetical protein, full insert sequence	7.53473	6.52541	6.34267e-07	6.01744e-05	0.324489	0.479877	0.459207	0.359295	0.510961	0.314913	0.336298	0.381951	0.308279
