# Supplementary material for: Progression of pathology in PINK1-deficient mouse brain from splicing via ubiquitination, ER stress, and mitophagy changes to neuroinflammation
Source: J Neuroinflammation. 2017 Aug 2;14:154. doi: 10.1186/s12974-017-0928-0 (PMC5541666; doi:10.1186/s12974-017-0928-0)
Supplement: Supplementary file 2 — Global transcriptome profile of Pink1-deficient mouse cerebellar tissue at ages 6 weeks (A), 6 months (B), and 18 months (C), illustrating the network with respect to interactions between the encoded proteins, employing the STRING web-server multiple proteins algorithm. (ZIP 11629 kb) [file 12974_2017_928_MOESM2_ESM.zip]

Archive with 3 entries (3 files):
- TorresAuburger-SupplFigureS1A.tif
- TorresAuburger-SupplFigureS1B.tif
- TorresAuburger-SupplFigureS1C.tif
