# Supplementary material for: Progression of pathology in PINK1-deficient mouse brain from splicing via ubiquitination, ER stress, and mitophagy changes to neuroinflammation
Source: J Neuroinflammation. 2017 Aug 2;14:154. doi: 10.1186/s12974-017-0928-0 (PMC5541666; doi:10.1186/s12974-017-0928-0)
Supplement: Supplementary file 3 — STRING bioinformatics assessment of all significant changes, including subtle effects. Ranked list of the significant transcript expression changes in PINK1-deficient mouse cerebellar tissue at ages 6 weeks, 6 months, and 18 months, which were used as input for the STRING analysis (A). Significant functional enrichments in the protein-protein-interaction network according to the STRING database is shown regarding GO Cellular component at 6 weeks with all factors of AdjPvalue <0.05 (B), 6 months with all factors of AdjPvalue <0.05 (C), and 18 months with all factors of AdjPvalue <0.01, with the term “intracellular membrane-bounded organelle” being prominent at all 3 ages (D). Prominent enrichments were highlighted in yellow color. In GO Molecular Process at 18 months with all factors of AdjPvalue <0.01 the relevance of stimulus- and stress-dependent pathways is apparent, e.g., endoplasmic reticulum stress, and a significant enrichment of mitophagy factors appears here in lines 495 and 518 (E). Among KEGG pathways at 18 months with all factors of AdjPvalue <0.01, the highest ranked pathways include “MAPK signaling”, “Ubiquitin-mediated proteolysis”, “Protein processing in endoplasmic reticulum” and “Bacterial invasion of epithelial cells” (F). Orange color was used to highlight some MAPK-dependent synaptic signaling pathways with significant enrichment, purple color was used for ubiquitination and protein processing pathways, green color was used for neuroinflammation pathways. (ZIP 366 kb) [file 12974_2017_928_MOESM3_ESM.zip]

Archive with 6 entries (6 files):
- TorresAuburger-SupplTableS2A.xls
- TorresAuburger-SupplTableS2B.xls
- TorresAuburger-SupplTableS2C.xls
- TorresAuburger-SupplTableS2D.xls
- TorresAuburger-SupplTableS2E.xls
- TorresAuburger-SupplTableS2F.xls
