# Supplementary material for: Progression of pathology in PINK1-deficient mouse brain from splicing via ubiquitination, ER stress, and mitophagy changes to neuroinflammation
Source: J Neuroinflammation. 2017 Aug 2;14:154. doi: 10.1186/s12974-017-0928-0 (PMC5541666; doi:10.1186/s12974-017-0928-0)
Supplement: Supplementary file 3 — STRING bioinformatics assessment of all significant changes, including subtle effects. Ranked list of the significant transcript expression changes in PINK1-deficient mouse cerebellar tissue at ages 6 weeks, 6 months, and 18 months, which were used as input for the STRING analysis (A). Significant functional enrichments in the protein-protein-interaction network according to the STRING database is shown regarding GO Cellular component at 6 weeks with all factors of AdjPvalue <0.05 (B), 6 months with all factors of AdjPvalue <0.05 (C), and 18 months with all factors of AdjPvalue <0.01, with the term “intracellular membrane-bounded organelle” being prominent at all 3 ages (D). Prominent enrichments were highlighted in yellow color. In GO Molecular Process at 18 months with all factors of AdjPvalue <0.01 the relevance of stimulus- and stress-dependent pathways is apparent, e.g., endoplasmic reticulum stress, and a significant enrichment of mitophagy factors appears here in lines 495 and 518 (E). Among KEGG pathways at 18 months with all factors of AdjPvalue <0.01, the highest ranked pathways include “MAPK signaling”, “Ubiquitin-mediated proteolysis”, “Protein processing in endoplasmic reticulum” and “Bacterial invasion of epithelial cells” (F). Orange color was used to highlight some MAPK-dependent synaptic signaling pathways with significant enrichment, purple color was used for ubiquitination and protein processing pathways, green color was used for neuroinflammation pathways. (ZIP 366 kb) [file 12974_2017_928_MOESM3_ESM.zip › TorresAuburger-SupplTableS2A.xls]

## Sheet: 6weeks
Affymetrix ID	GeneSymbol	FoldChange	Adj. P-value
1451148_at	Pink1	-3.71899	6.64751e-54
1441937_s_at	Pink1	-4.08546	1.53037e-48
1458719_at	---	3.63423	1.12711e-34
1424108_at	Glo1	1.06143	1.36597e-25
1459828_at	Srrm1	1.39707	2.30903e-17
1428375_at	4932415G12Rik	-1.21719	6.22834e-17
1451240_a_at	Glo1	0.909333	1.55786e-16
1429232_at	2610528B01Rik	0.66621	2.45582e-16
1420935_a_at	Srrm1	1.30594	3.04387e-16
1431708_a_at	Tia1	4.57552	3.4069e-16
1438239_at	Mid1	-2.69142	9.22747e-14
1444739_at	Pole4	1.76971	1.64744e-12
1428376_at	4932415G12Rik	-0.924446	2.10961e-12
1418526_at	Fusip1	-0.681274	3.55738e-12
1449121_at	Fusip1	-0.438246	6.4346e-12
1438766_at	Pnrc2	-0.703785	7.51254e-12
1440296_at	EG666250 /// LOC669419	-1.72388	3.66765e-11
1444772_at	Smyd3	2.64557	4.65874e-11
1424109_a_at	Glo1	0.979525	7.41643e-11
1430375_a_at	Ccl27	-1.49207	6.4254e-10
1443109_at	5830417C01Rik	1.545	2.63159e-09
1419188_s_at	Ccl27	-1.35462	7.89478e-09
1436320_at	---	-0.457413	1.85543e-08
1428850_x_at	Cd99	-0.498917	2.06612e-08
1438807_at	Hnrpr	-0.421557	3.40761e-08
1434962_x_at	Ccl27	-1.43349	4.58084e-08
1453556_x_at	Cd99	-0.495317	8.04037e-08
1441228_at	Apold1	-0.513662	1.01298e-07
1460674_at	Paqr7	-0.401877	1.48844e-07
1417273_at	Pdk4	-0.483876	2.79684e-07
1434540_a_at	Clta	-2.41645	3.02669e-07
1418228_at	Nfu1	-0.400274	4.65254e-07
1428989_at	0710001D07Rik	0.469342	8.36697e-07
1417184_s_at	Hbb-b1 /// Hbb-b2	-1.1917	8.75367e-07
1438796_at	---	-1.38897	9.89065e-07
1459728_at	5830446M03Rik	0.674633	1.61291e-06
1452218_at	Ccdc117	-0.58519	1.77563e-06
1430514_a_at	Cd99	-0.377413	2.16256e-06
1441058_at	Itpkb	0.857298	2.16256e-06
1436070_at	Glo1	0.567393	2.4142e-06
1433869_at	Zxdc	0.393656	2.66418e-06
1452988_at	2610306M01Rik	-0.72968	2.98669e-06
1428101_at	Rnf38	-0.311829	3.33443e-06
1452318_a_at	Hspa1b	-1.33091	3.99754e-06
1421141_a_at	Foxp1	-1.06414	4.40264e-06
1437247_at	Fosl2 /// LOC634417	-1.16582	4.57211e-06
1427127_x_at	Hspa1b	-1.158	6.70384e-06
1452757_s_at	Hba-a1	-1.08145	6.97407e-06
1434121_at	Lgi4	-0.303636	7.37441e-06
1428361_x_at	Hba-a1	-0.96093	7.39429e-06
1423233_at	Cebpd	-0.521666	7.5674e-06
1418527_a_at	Fusip1	-0.415257	8.68316e-06
1427126_at	Hspa1b	-1.30142	8.82433e-06
1425228_a_at	Dguok	0.299382	1.09763e-05
1419979_s_at	Creb3	-0.855825	1.55253e-05
1417361_at	Asb3	-0.170318	1.67469e-05
1451612_at	Mt1	-0.594921	1.71767e-05
1452168_x_at	Gspt1	-0.195419	1.84391e-05
1421142_s_at	Foxp1	-0.757613	1.84391e-05
1447060_at	Smyd3	1.13942	1.8806e-05
1423372_at	Pole4	0.455041	1.90606e-05
1446158_at	Exoc6b	-0.597619	2.54173e-05
1417714_x_at	Hba-a1	-1.28577	2.57985e-05
1436725_at	E130306D19Rik	0.573324	2.61953e-05
1428437_at	Lsm14a	0.69004	2.89261e-05
1429521_at	Alkbh8	-0.27527	3.06665e-05
1416755_at	Dnajb1	-0.474852	3.25638e-05
1456050_at	C80998	-0.806969	3.28367e-05
1438855_x_at	Tnfaip2	0.496052	3.35359e-05
1422612_at	Hk2	-0.801559	5.35049e-05
1439640_at	---	0.324489	6.01744e-05
1428306_at	Ddit4	-0.481619	8.02862e-05
1448170_at	Siah2	-0.405886	8.22378e-05
1437142_a_at	Pigo	-0.720377	8.72248e-05
1452456_at	Nrip2	0.509628	8.92678e-05
1416756_at	Dnajb1	-0.412554	9.23699e-05
1460258_at	Lect1	1.66366	9.52826e-05
1436893_a_at	7-Mar	0.422483	9.83184e-05
1422216_at	Mid2	0.34584	0.000135898
1422733_at	Fjx1	-0.361593	0.000137242
1431295_a_at	Stx18	-0.327557	0.00014213
1424403_a_at	Rufy3	-0.187494	0.000145681
1450407_a_at	Anp32a	-0.435708	0.000156566
1450849_at	Hnrpu	-0.457408	0.000157719
1423051_at	Hnrpu	-0.476387	0.000159726
1434977_at	4933403F05Rik	-0.346462	0.000164407
1460645_at	Chordc1	-0.225004	0.000164748
1416064_a_at	Hspa5	-0.380077	0.000165298
1449731_s_at	Nfkbia	-0.30588	0.000167443
1421604_a_at	Klf3	-0.334052	0.000167958
1419147_at	Rec8L1	1.04894	0.000190296
1450988_at	Lgr5	-0.334996	0.000196687
1429390_at	Acpl2	0.426357	0.000196687
1439256_x_at	Gpr137b /// LOC664862	-0.207103	0.000206566
1442399_at	Xrn1	-0.199808	0.000212557
1428903_at	3110037I16Rik	0.274126	0.00024273
1439768_x_at	Sema4f	-0.636119	0.000243949
1439022_at	Phactr1	-0.277327	0.000247303
1428946_at	Ube1l2	-0.262716	0.000258646
1441635_at	Olfml2a	-0.298643	0.000267741
1417158_at	Zxdc	-0.598356	0.000274274
1444029_at	Parp11	0.400629	0.000287973
1418565_at	Serbp1	-0.386276	0.000291957
1452963_at	9530077C05Rik	-0.282076	0.000292523
1438300_at	Cdkn2aip	-0.363527	0.000357601
1449577_x_at	Tpm2	-0.607224	0.000359916
1429169_at	Rbm3	-0.61679	0.000362178
1440357_at	---	0.389882	0.000371225
1425249_a_at	Tyro3	-0.348759	0.000374311
1459293_at	Gprin3	0.279797	0.000381828
1424276_at	Snx16	-0.168921	0.00038619
1441847_at	Mast2	0.293474	0.000390103
1425488_at	Slu7	-0.303305	0.000392851
1417045_at	Bid	0.391934	0.000392851
1443835_x_at	1110014K08Rik /// EG664786 /// LOC664849 /// LOC672175	0.359252	0.000392991
1427590_at	Zfp39	0.35125	0.000407491
1453983_a_at	Mett10d	-0.295428	0.000428526
1452388_at	Hspa1a	-0.783669	0.000432522
1435158_at	Rbm12b	-0.365299	0.000432566
1452263_at	Slc35f4	0.395526	0.000456674
1444542_at	---	0.251543	0.000456674
1440365_at	Actb	-0.311999	0.000457647
1459921_at	Nxph1	0.258692	0.000458716
1455652_at	AW124694	-0.199525	0.000474388
1429510_at	2810410L24Rik	0.304963	0.000490333
1422616_s_at	Wdr54	0.441427	0.000515079
1458626_at	Nos1	0.369202	0.00052979
1450483_at	Gja12	-0.469054	0.0005308
1428944_at	Ube1l2	-0.193725	0.000548619
1419157_at	Sox4 /// LOC672274	-0.455977	0.000563027
1416675_s_at	Plcd1	0.229948	0.000570953
1436387_at	C330006P03Rik	-0.609847	0.000621622
1425248_a_at	Tyro3	-0.32379	0.000635313
1416920_at	Rbm4	-0.220806	0.000642535
1425028_a_at	Tpm2	-0.416386	0.000703558
1431592_a_at	Sh3kbp1	-0.409872	0.00072876
1456551_at	Klf15	-0.280193	0.00074307
1442272_at	1700021K10Rik	0.338411	0.00074307
1426626_at	Gtf2f2	-0.332776	0.0007623
1425342_a_at	Kcnk3	-0.552198	0.000785088
1417888_at	Trim13	-0.730514	0.000788996
1417403_at	Elovl6	-0.287725	0.000815268
1435357_at	---	-0.298395	0.000823923
1426968_a_at	Rdh10	-0.204077	0.000833071
1427567_a_at	Tpm3	-0.270442	0.00085006
1448185_at	Herpud1	-0.150078	0.00088538
1455624_at	---	0.20318	0.000930695
1454014_a_at	Mkks	-0.31753	0.000935835
1448456_at	Cln8	-0.393563	0.000945262
1424176_a_at	Anxa4	-1.09147	0.000966071
1435339_at	Kctd15	-0.320713	0.000969414
1419200_at	Fxyd7	-0.700031	0.000993268
1437169_at	Pdlim1 /// LOC545743	0.241951	0.00101254
1432713_at	6430709C05Rik	-0.326788	0.00103696
1416288_at	Dnaja1	-0.2527	0.00106487
1437797_at	Atp2a2	-0.291234	0.00106822
1418003_at	1190002H23Rik	-0.23909	0.00108035
1421830_at	Ak3l1	-0.37812	0.00109699
1415806_at	Plat	-0.337278	0.00124266
1423512_at	AW209491	-0.190703	0.00138191
1429685_at	C030002O17Rik	-0.226893	0.00140162
1433883_at	Tpm4	-0.305004	0.00145319
1445824_at	Zfp458	-0.299187	0.00147791
1426001_at	Eomes	-0.37286	0.00151125
1449550_at	Myo1c	0.356746	0.00154745
1445669_at	Spry4	-0.474925	0.00157456
1450437_a_at	Ncam1	-0.206043	0.00159256
1439774_at	Prrx1	-0.505753	0.0016082
1415868_at	Cct4	-0.359552	0.00166654
1424838_at	A330049M08Rik	0.25355	0.0016769
1424332_at	Rab40c	-0.610791	0.00177936
1422764_at	Mapre1	-0.2119	0.00180851
1446280_at	Foxp1	-1.22838	0.00183374
1438798_at	4931406P16Rik	0.56513	0.00184909
1457283_at	---	-0.342484	0.00189976
1419449_a_at	Gnai2	-0.267567	0.00192918
1427866_x_at	Hbb-b1	-0.516561	0.00193605
1427640_a_at	Runx1t1	-0.29561	0.00193684
1426402_at	Syncrip	-0.311314	0.00209962
1440562_at	---	0.732334	0.00210308
1435800_a_at	Csda	-0.238179	0.00210555
1423636_at	Wdr31	0.440792	0.00210555
1445400_at	Hbxip	0.411337	0.00210586
1453737_at	Wipf2	-0.460515	0.00211997
1451675_a_at	Alas2	-0.685046	0.00218835
1419066_at	Ier5l	0.314154	0.00223527
1439255_s_at	Gpr137b /// LOC664862	-0.302168	0.00234961
1426663_s_at	Slc45a3	-0.59902	0.00246224
1425101_a_at	Fkbp6	0.269547	0.00266064
1434960_at	Taf9b	-0.419055	0.00267036
1423795_at	Sfpq	-0.281986	0.00279295
1426785_s_at	Mgll	0.16372	0.00279946
1437410_at	Aldh2	0.30039	0.00281275
1448880_at	Ube2l3	-0.321122	0.00336079
1455804_x_at	Oxct1	-0.396496	0.00336079
1427159_at	Pcf11	-0.268669	0.00339085
1440709_at	C130081A10Rik	0.302471	0.00342641
1460045_at	Cdh7	-0.394713	0.00342764
1438447_at	Ddx11	0.278405	0.00346576
1421204_a_at	Nudt16	0.225858	0.00346642
1420497_a_at	Cebpz	-0.271094	0.00351642
1434448_at	Txlna	-0.344725	0.00354257
1452825_at	5330410G16Rik	-0.284745	0.0035948
1424271_at	Dcamkl1	-0.382976	0.00367123
1446480_at	D8Ertd82e	-0.679059	0.00379813
1454292_at	Gmcl1	-0.909008	0.00383827
1418299_at	Dpysl4	-0.348971	0.00384311
1458665_at	---	0.434924	0.00387812
1427410_at	Dleu2	-0.356398	0.00406466
1444285_at	Morf4l1	-0.745715	0.00430422
1447923_at	2810013C04Rik	-0.213609	0.00436592
1436317_at	D230012E17Rik	-0.320516	0.00438016
1436790_a_at	Sox11	-0.364561	0.00447791
1422683_at	Irak1bp1	-0.695452	0.00449
1441198_at	Zfp39	0.404318	0.00454543
1443728_at	---	-0.342757	0.00455311
1426510_at	Sccpdh	0.269785	0.00474844
1416929_at	Rbm12	-0.3827	0.00479191
1456955_at	---	0.518489	0.00483419
1443175_at	A830010M09Rik	-0.351571	0.00490135
1460275_at	Gpr3	-0.257353	0.0049574
1422536_at	Tnni3	0.35809	0.00503937
1427013_at	Car9	0.79653	0.00514258
1432014_at	6530409C15Rik	0.471366	0.00536746
1425460_at	Mtmr2	-0.277454	0.0054511
1423305_at	Extl1	-0.342972	0.00552877
1428233_at	Cpsf6	-0.319802	0.00553601
1455242_at	Foxp1	-0.362375	0.00558174
1446934_at	---	-0.670876	0.00559997
1415907_at	Ccnd3	-0.195986	0.00560684
1425301_at	Ncam2	-0.294542	0.00567237
1431003_a_at	2610002J02Rik	0.213228	0.00575426
1447589_at	Ppp4r1	0.382002	0.00577412
1422134_at	Fosb	-0.707992	0.00590486
1435832_at	Lrrc4	-0.289123	0.00595479
1428463_a_at	Ppp2r5e	-0.259648	0.00595479
1458148_at	Nlrc3	1.65923	0.00599855
1441492_at	Zfp64	0.373158	0.00608372
1428048_at	BC027582	0.498696	0.00625689
1451629_at	Lbh	0.379095	0.00627468
1458202_at	6330500D04Rik	0.439194	0.00660804
1454725_at	Tra2a	-0.438577	0.00670861
1419313_at	Ccnt1	-0.228185	0.00736809
1428592_s_at	Usp38	-0.333763	0.0073754
1442144_at	Emid1	-0.563294	0.00763409
1440030_at	Kcnt2	0.753822	0.00768821
1448113_at	Stmn1 /// LOC639458	-0.590475	0.00769911
1423669_at	Col1a1	0.436327	0.00770168
1431345_a_at	Taf1b	-0.236201	0.00777867
1448666_s_at	Tob2	-0.427228	0.0078287
1439398_x_at	Nelf	0.335403	0.00785178
1421680_at	A030005L19Rik	0.394715	0.00785447
1418025_at	Bhlhb2	0.203537	0.00804245
1429745_at	EG434795 /// EG434797 /// EG546325 /// MGC106740 /// LOC574405 /// LOC674060	0.227201	0.00805703
1440041_at	Tgfbr3	-0.471872	0.00814217
1459992_x_at	Cln8	-0.256797	0.00816311
1452940_x_at	Pitpnc1	0.397836	0.00826559
1428171_at	Prpf39	-0.263064	0.0083267
1443012_at	Tcf12	-0.432714	0.00860012
1436659_at	Dcamkl1	-0.279203	0.00866858
1450527_at	Sstr1	0.588088	0.008677
1456950_at	Alms1	0.483158	0.00868667
1452517_at	Plekhh1	-0.251065	0.00868802
1430251_at	D330022H12Rik	0.358098	0.00885496
1418760_at	Rdh11	-0.222017	0.0088928
1445062_at	Elovl6	-0.396009	0.00895186
1432012_a_at	Nsun6	0.322482	0.00917449
1435619_at	---	0.208353	0.00927227
1426566_s_at	Il17re	0.423296	0.00934773
1423444_at	Rock1	-0.287708	0.00950337
1438516_at	Rif1	-0.343207	0.00955417
1458099_at	---	-0.323767	0.00968363
1447307_at	---	-0.320445	0.0101202
1424324_at	Esco1	0.4095	0.01013
1451199_at	Qtrtd1	-0.315955	0.0101463
1427562_a_at	Prkca	0.462199	0.0103678
1446358_at	Bai3	-0.587752	0.0105722
1418611_at	Gpr162	0.168769	0.0105835
1451642_at	Kif1b	-0.298991	0.0106007
1432329_a_at	Matk	-0.461487	0.0108038
1422546_at	Ilf3	-0.497352	0.0108356
1454120_a_at	Pcgf6	-0.372836	0.0109666
1443642_at	Taok2	0.541798	0.0109781
1442032_at	BC030500	0.370583	0.0110718
1444385_at	Taok1	-0.333308	0.0112449
1438531_at	A730054J21Rik	0.462557	0.0114004
1438648_x_at	1190003M12Rik	0.369371	0.0116357
1426112_a_at	Cd72	0.594309	0.0120139
1455739_at	EG245190	0.27106	0.012153
1422583_at	Rab3b	0.440252	0.0122255
1453456_at	2900084O13Rik	-0.215781	0.0122255
1429092_at	Vkorc1l1	-0.264642	0.0124571
1440461_at	0910001A06Rik	-0.28727	0.0132733
1419244_a_at	Rab14	-0.253096	0.0133599
1437235_x_at	Lpp	0.272661	0.0135677
1425993_a_at	Hsp110	-0.335985	0.0137053
1417409_at	Jun	-0.419661	0.0137566
1456944_at	Kcnc1	0.432521	0.0139417
1437696_at	BC049807	-0.319761	0.0140614
1459589_at	Cryl1	0.410731	0.0141583
1452440_at	Tnfsf12 /// Tnfsf12-tnfsf13	0.208835	0.0145669
1423566_a_at	Hsp110	-0.455919	0.0146311
1455076_a_at	4933424B01Rik	-0.233906	0.014656
1447834_at	Copz1	0.358592	0.0147091
1458179_at	---	-0.385847	0.0148458
1458632_at	Dpysl2	-0.388915	0.0148482
1438073_at	Spry3	-0.20552	0.0150117
1428755_at	Creb1	-0.185051	0.0152626
1453159_at	Efhc1	0.338447	0.0152933
1438340_at	A930006D11Rik	-0.593528	0.0153907
1416895_at	Efna1	0.380232	0.015735
1425756_at	Rab40b	-0.313565	0.0157521
1440005_at	Onecut2	-0.388771	0.0158325
1456373_x_at	Rps20	-0.28095	0.0165057
1445439_at	Epb4.9	0.315822	0.0165584
1456824_at	Zfp612	-0.197922	0.0166439
1416200_at	Il33	-0.465806	0.0166882
1444196_at	AI662501	0.403551	0.0167795
1441475_at	Ptk2	-0.356962	0.0171017
1439450_x_at	A230046K03Rik	-0.257354	0.0176048
1422762_at	Kif17	0.340531	0.0189618
1443127_at	9630021D06Rik	-0.264747	0.019275
1456402_at	A330076H08Rik	-0.545217	0.0194065
1416752_at	Ldb3	-0.273533	0.0194276
1438821_at	Rfwd2	-0.294189	0.0194563
1443867_at	Ankrd12	-0.410338	0.0201181
1423062_at	Igfbp3	-0.594797	0.0203305
1440511_at	---	-0.337882	0.0204692
1423794_at	D2Ertd391e	-0.209664	0.0208628
1446347_at	4631405J19Rik	0.310568	0.0214165
1416432_at	Pfkfb3	-0.377328	0.0216435
1418497_at	Fgf13	0.186863	0.021768
1454547_at	2310045N14Rik	0.415199	0.0217869
1460179_at	Dnaja1	-0.202705	0.0221319
1426541_a_at	Endod1	-0.476568	0.0231738
1458054_at	Ext1	-0.404908	0.0240488
1420136_a_at	EG623356	-0.449704	0.024984
1442500_at	C77406	0.393087	0.0254528
1422403_at	Ifna1 /// Ifna2 /// Ifna4 /// Ifna5 /// Ifna6 /// Ifna7 /// Ifna9 /// Ifnab /// OTTMUSG00000011275 /// OTTMUSG00000007655 /// Ifna12 /// LOC384100 /// Ifna14	0.41243	0.025637
1453011_at	Bdh2	0.354747	0.0269814
1456975_at	Taok1	-0.319341	0.0274963
1456553_at	Zcchc11	-0.30614	0.0275559
1428074_at	Tmem158	-0.250513	0.0305148
1428167_a_at	Mpzl1	-0.416485	0.0320423
1433668_at	Pnrc1	-0.248315	0.0324453
1440425_at	---	-0.330978	0.0328522
1439138_at	2310035C23Rik	-0.381266	0.032883
1453595_at	2900064B18Rik	-0.554014	0.034283
1431836_x_at	5430432N15Rik	0.463246	0.0345172
1436703_x_at	Snapc2	0.226444	0.0346988
1425537_at	Ppm1a	-0.292624	0.0348316
1439724_at	Ric8b	0.410578	0.0349475
1426827_at	A730098D12Rik	-0.262664	0.0360821
1454056_at	9030407P20Rik	0.245231	0.0363576
1442959_at	Birc6	-0.368577	0.0364085
1453852_at	8430408E17Rik	-0.360633	0.0370396
1445028_at	Prkca	0.344307	0.0375076
1451636_at	Ankrd33	0.328174	0.0382029
1452179_at	Phf17	-0.375856	0.0383583
1422953_at	Fpr-rs2	0.510288	0.0387901
1415904_at	Lpl	0.586583	0.0389126
1439093_at	---	-0.248126	0.0393713
1420734_at	Ppp1r3f	0.192953	0.0397539
1430745_at	5930409G06Rik	-0.518333	0.0408055
1438068_at	---	-0.333622	0.04094
1441046_at	---	0.35484	0.0411737
1436296_x_at	Dnaic2	-0.457875	0.0422694
1437093_at	Dnaic1	0.460881	0.0422719
1442621_at	C77798	0.373087	0.0429967
1459322_at	Syne2	-0.420727	0.0441522
1442775_at	---	-0.632757	0.0453932
1437171_x_at	Gsn	-0.320109	0.045398
1419420_at	St6galnac5	-0.388966	0.0456653
1456916_at	Nsd1	-0.343328	0.0496549
1441986_at	Zcchc6	-0.405124	0.0497213
1427912_at	Cbr3	0.412647	0.0499813

## Sheet: 24weeks
Affymetrix ID	GeneSymbol	FoldChange	Adj. P-value
1451148_at	Pink1	-3.82584	6.64751e-54
1441937_s_at	Pink1	-4.29969	1.53037e-48
1454714_x_at	Phgdh /// LOC668771 /// LOC670155 /// LOC671972 /// LOC673015	-3.66015	4.43491e-33
1456471_x_at	Phgdh /// LOC382931 /// LOC384524 /// LOC385344 /// LOC547171 /// LOC627427 /// LOC666422 /// LOC666875 /// LOC668771 /// LOC669671 /// LOC669985 /// LOC670155 /// LOC670187 /// LOC671102 /// LOC671972 /// LOC673015 /// LOC675010	-1.14865	2.02785e-17
1459828_at	Srrm1	1.06354	2.30903e-17
1428375_at	4932415G12Rik	-0.49514	6.22834e-17
1429232_at	2610528B01Rik	0.801764	2.45582e-16
1420935_a_at	Srrm1	0.744903	3.04387e-16
1431708_a_at	Tia1	4.03906	3.4069e-16
1446565_at	Man1a2	-1.59118	1.64942e-13
1444739_at	Pole4	0.987019	1.64744e-12
1428376_at	4932415G12Rik	-0.696239	2.10961e-12
1418526_at	Fusip1	-0.868299	3.55738e-12
1449121_at	Fusip1	-0.837976	6.4346e-12
1438766_at	Pnrc2	-0.833064	7.51254e-12
1416187_s_at	Pnrc2	0.40213	7.51254e-12
1424109_a_at	Glo1	-0.247871	7.41643e-11
1416041_at	Sgk	-1.1254	2.81586e-10
1430375_a_at	Ccl27	-0.400866	6.4254e-10
1441493_at	Erc1	-2.53728	9.33942e-10
1418129_at	Dhcr24	-0.270512	3.25034e-09
1419188_s_at	Ccl27	-0.42623	7.89478e-09
1436320_at	---	1.63855	1.85543e-08
1428850_x_at	Cd99	1.08249	2.06612e-08
1433837_at	8430408G22Rik	-0.607299	2.48668e-08
1438807_at	Hnrpr	-0.513652	3.40761e-08
1434962_x_at	Ccl27	-0.443076	4.58084e-08
1453556_x_at	Cd99	0.857106	8.04037e-08
1418032_at	Itfg2	0.252772	9.45273e-08
1441228_at	Apold1	-0.528912	1.01298e-07
1460674_at	Paqr7	-0.31584	1.48844e-07
1443196_at	---	-0.44779	2.19719e-07
1417273_at	Pdk4	-1.02052	2.79684e-07
1434540_a_at	Clta	-0.927203	3.02669e-07
1437042_at	Arnt	0.519627	3.4557e-07
1455592_at	Vangl2	0.41053	3.69367e-07
1418228_at	Nfu1	-0.51176	4.65254e-07
1421487_a_at	Nck1	-0.283598	5.21709e-07
1427212_at	Mapkap1	-0.229906	7.00026e-07
1436022_at	Endogl1	-0.474574	8.34315e-07
1428989_at	0710001D07Rik	-0.230315	8.36697e-07
1438796_at	---	-1.93288	9.89065e-07
1459728_at	5830446M03Rik	0.526139	1.61291e-06
1452218_at	Ccdc117	-0.797761	1.77563e-06
1448140_at	Ciapin1	-0.327697	1.83992e-06
1430514_a_at	Cd99	0.715825	2.16256e-06
1415996_at	Txnip	-0.644592	2.17186e-06
1431031_at	Arid4b	-0.573125	2.50308e-06
1420088_at	Nfkbia	-0.50702	2.51975e-06
1433869_at	Zxdc	0.528433	2.66418e-06
1422327_s_at	G6pd2 /// G6pdx	-0.582375	2.86155e-06
1452988_at	2610306M01Rik	-0.29745	2.98669e-06
1432419_a_at	2700078K21Rik	-0.368033	2.98872e-06
1452318_a_at	Hspa1b	-1.05724	3.99754e-06
1438157_s_at	Nfkbia	-0.592005	3.99754e-06
1437247_at	Fosl2 /// LOC634417	-1.68087	4.57211e-06
1439630_x_at	Sbsn	-0.289447	5.22214e-06
1459530_at	Hsd17b12	-1.67944	6.36533e-06
1450679_at	5730470L24Rik	-0.649862	6.51581e-06
1427127_x_at	Hspa1b	-1.04178	6.70384e-06
1440773_at	2410004P22Rik	0.659982	7.5674e-06
1423233_at	Cebpd	-1.28613	7.5674e-06
1425190_a_at	Phospho2	-0.425393	7.5674e-06
1431644_a_at	Ica1	-0.27304	7.73436e-06
1434752_at	Zfp207	-0.26449	8.37965e-06
1453224_at	Zfand5	-0.691189	8.37965e-06
1418527_a_at	Fusip1	-0.823482	8.68316e-06
1427126_at	Hspa1b	-1.15996	8.82433e-06
1424816_at	Cecr5	0.357143	9.08769e-06
1421828_at	Kpna3	-0.40642	1.05954e-05
1439089_at	Zbtb41	-0.458908	1.06074e-05
1445562_at	Zbtb16	-0.605892	1.07831e-05
1431406_at	Agxt2l1	-0.472421	1.15139e-05
1424880_at	Trib1	-0.225122	1.40326e-05
1431382_a_at	Rsnl2	-0.615888	1.44533e-05
1440910_at	C77370	-0.421673	1.44533e-05
1419979_s_at	Creb3	-0.60702	1.55253e-05
1426680_at	Sepn1	0.278674	1.58316e-05
1428052_a_at	Zmym1	-0.788035	1.64663e-05
1455217_at	Lrig2	-0.456811	1.68859e-05
1451317_at	Ythdf2	-0.614504	1.71594e-05
1451612_at	Mt1	-0.588748	1.71767e-05
1439197_at	Pik4cb	0.502375	1.71767e-05
1452168_x_at	Gspt1	-0.189291	1.84391e-05
1423372_at	Pole4	0.183178	1.90606e-05
1436559_a_at	Psmd10	-0.317195	1.90606e-05
1420959_at	Asph	-0.599141	2.16667e-05
1446158_at	Exoc6b	-0.643229	2.54173e-05
1417714_x_at	Hba-a1	-0.577946	2.57985e-05
1432249_a_at	Ercc8	-0.502099	2.65287e-05
1455182_at	Kif1b	-0.677988	2.65287e-05
1422719_s_at	Nup50	-0.262485	2.91592e-05
1418716_at	Mrps25	-0.318741	2.96459e-05
1417371_at	Peli1	-0.347783	2.96459e-05
1417719_at	Sap30	-0.559239	2.96932e-05
1429521_at	Alkbh8	-0.3495	3.06665e-05
1447849_s_at	Maf	-0.332125	3.24732e-05
1416755_at	Dnajb1	-0.67516	3.25638e-05
1456050_at	C80998	-0.989699	3.28367e-05
1434360_s_at	Ptprg /// LOC632664	-0.470055	3.65446e-05
1432488_a_at	Sf3a3 /// LOC626830	-0.546562	3.66808e-05
1460260_s_at	Kpna1	-0.202919	3.84254e-05
1421435_at	Grid2	-0.306435	3.96428e-05
1423094_at	Crbn	-0.47818	4.10522e-05
1420977_at	Man1a2	-0.600028	4.30507e-05
1429518_at	Faim2	0.29302	4.41136e-05
1428834_at	Dusp4	-0.758885	4.52597e-05
1435071_at	Zfyve1	-0.507381	4.52597e-05
1452098_at	Chtf18	0.415814	4.55401e-05
1431105_a_at	Tmem33	-0.609039	5.1493e-05
1424690_at	5930434B04Rik	0.334117	5.29738e-05
1447313_at	---	0.606334	5.35049e-05
1422612_at	Hk2	-0.618669	5.35049e-05
1416754_at	Prkar1b	-0.540632	5.35049e-05
1417566_at	Abhd5	-0.454228	5.35399e-05
1440845_at	E030031F02Rik	-0.606294	5.35399e-05
1453960_a_at	Capzb	-0.6319	5.46601e-05
1423528_at	Bcas3	-0.701901	5.93079e-05
1423948_at	Bag2	-0.469671	5.93079e-05
1433387_at	2900022M07Rik	-0.86929	5.93079e-05
1435527_at	Nfic	0.459843	6.00113e-05
1439640_at	---	0.479877	6.01744e-05
1448306_at	Nfkbia	-0.34119	6.01744e-05
1423082_at	Derl1	-0.503442	6.09905e-05
1454168_a_at	Clpb	-0.414027	6.21766e-05
1431334_a_at	4933433P14Rik	-0.516661	6.31324e-05
1428499_at	2810454L23Rik	0.27881	6.43441e-05
1427518_at	D10627	-0.373516	6.70778e-05
1422753_a_at	Polr3k	-0.645499	6.70948e-05
1436972_at	Gpr61	0.188904	6.86284e-05
1448364_at	Ccng2	-0.564496	6.93706e-05
1417567_at	Ctnnbip1	0.414202	6.98258e-05
1421679_a_at	Cdkn1a	-0.635448	7.48769e-05
1429003_at	Snw1	-0.401727	7.63775e-05
1428721_at	Btbd5	-0.666851	7.68204e-05
1428306_at	Ddit4	-1.15727	8.02862e-05
1457570_at	A230001M10Rik	0.412265	8.02862e-05
1425732_a_at	Mxi1	-0.696315	8.19484e-05
1448170_at	Siah2	-0.242272	8.22378e-05
1448501_at	Tspan6	-0.319028	8.43046e-05
1421544_at	Dnahc11	0.268337	8.43046e-05
1430515_s_at	Aasdhppt	-0.422456	8.69657e-05
1449209_a_at	Rdh11	-0.326118	8.72248e-05
1437142_a_at	Pigo	-0.613435	8.72248e-05
1421448_at	Garnl1	-0.482164	9.23699e-05
1416756_at	Dnajb1	-0.827817	9.23699e-05
1429056_at	Narg1l	-0.4408	9.32955e-05
1450778_a_at	Rnuxa	-0.235218	9.43866e-05
1458163_at	BC066028	0.318312	9.599e-05
1418715_at	Pank1	-0.495809	9.82249e-05
1436893_a_at	7-Mar	0.418179	9.83184e-05
1429655_at	Nudcd1	-0.495683	0.000105574
1424876_s_at	Spg20	-0.304301	0.000106337
1420339_at	0610016J10Rik	-0.439373	0.000108874
1459253_at	Arrdc3	-0.36213	0.000111643
1451457_at	Sc5d	-0.463317	0.00011689
1421209_s_at	Ikbkg	-0.364022	0.000123814
1429375_at	Anapc10	-0.343737	0.000127065
1450321_at	Zfp354c	-0.544155	0.000127065
1431422_a_at	Dusp14	-0.418237	0.000132754
1459072_at	---	-0.723638	0.000134051
1416459_at	Arf2	-0.508624	0.00013527
1422216_at	Mid2	-0.438595	0.000135898
1460025_at	Lrig2	-0.613954	0.000136122
1436780_at	Ogt	0.690004	0.000139183
1454142_a_at	Pwp1	-0.538758	0.000140998
1431554_a_at	Anxa9	-0.35931	0.000141141
1431295_a_at	Stx18	-0.2492	0.00014213
1423183_at	Lgi1	-0.376521	0.000144371
1429902_at	5830443J22Rik	-0.71649	0.000144577
1428199_at	Adal	-0.528365	0.000150817
1435912_at	Ubxd7	-0.642053	0.000151054
1434978_at	4933403F05Rik	-0.464586	0.000152663
1451251_at	Appbp2	-0.525027	0.000153007
1432436_a_at	Ak3	-0.705886	0.000155393
1415997_at	Txnip	-0.592357	0.000155961
1450407_a_at	Anp32a	-0.484697	0.000156566
1441128_at	Wdr20a	-0.371614	0.000162964
1434977_at	4933403F05Rik	-0.358281	0.000164407
1460645_at	Chordc1	-0.480047	0.000164748
1454814_s_at	AU021838	-0.450934	0.00016482
1416064_a_at	Hspa5	-0.450623	0.000165298
1441799_at	6030422H21Rik	-1.0213	0.000170781
1435518_at	Rap1b	-0.426433	0.00017498
1419289_a_at	Syngr1	-0.590546	0.000177045
1431734_a_at	Dnajb4	-0.524622	0.000177277
1450388_s_at	Twsg1	0.185517	0.000186841
1438460_at	Zmym4	-0.267134	0.00018895
1418974_at	Blzf1	-0.334534	0.000189916
1460649_at	Irak1	0.632271	0.00019185
1436382_at	Zbtb12	-0.321702	0.000192176
1429390_at	Acpl2	0.635481	0.000196687
1451326_at	Abhd14b	0.524865	0.000196687
1439256_x_at	Gpr137b /// LOC664862	-0.311306	0.000206566
1425329_a_at	Cyb5r3	-0.310751	0.000210391
1457768_at	Prune	0.641477	0.000210391
1450907_at	Spcs2	-0.389282	0.000210391
1442399_at	Xrn1	0.261082	0.000212557
1424321_at	Rfc4	-0.326173	0.000220562
1448824_at	Ube2j1	-0.371987	0.000222289
1420656_at	Abcg8	0.427838	0.00022454
1427266_at	Pb1	-0.470795	0.000228046
1449037_at	Crem	-0.686149	0.000233256
1448673_at	Pvrl3	-0.634137	0.000239297
1435169_at	A930001N09Rik	-0.42903	0.000242629
1439768_x_at	Sema4f	-0.528732	0.000243949
1426519_at	P4ha1	-0.870812	0.000246875
1438635_x_at	B930041F14Rik	0.483144	0.000247303
1442027_at	Nbeal1	-0.308911	0.000249602
1419045_at	Slc25a23	0.91033	0.000249602
1432432_a_at	Rab3c	-0.429452	0.000249602
1448397_at	Gjb6	-0.435769	0.000251523
1428946_at	Ube1l2	-0.449734	0.000258646
1436858_at	Mbnl2	-0.421981	0.000265555
1441973_at	Zfp295	-0.387432	0.000267741
1430117_a_at	Zfp64	-0.449111	0.000268695
1445686_at	---	0.464758	0.000268695
1427230_at	B930041F14Rik	0.576738	0.00027305
1417158_at	Zxdc	-0.72852	0.000274274
1448591_at	Ctss	0.177254	0.00027535
1444048_at	Rp9h	0.702524	0.000287643
1452963_at	9530077C05Rik	-0.530234	0.000292523
1436167_at	Shf	0.43406	0.000295134
1441802_at	Spred2	-0.41257	0.000295863
1428971_at	5730405I09Rik	-0.334342	0.000305955
1430571_s_at	Armc6	-0.43066	0.000306179
1426398_at	Ube2w	-0.474597	0.000306547
1451839_a_at	Pde7a	-0.780254	0.000310604
1424538_at	Ubl4	-0.590129	0.000324106
1416706_at	Rpe	-0.512893	0.000328989
1452376_at	Zfp444	-0.304022	0.000332711
1451793_at	Klhl24	-0.633063	0.000336106
1455896_a_at	Kcnk1	-0.487562	0.0003389
1433621_at	Wdr41	-0.342002	0.000341037
1448379_at	Pot1a	-0.335238	0.000346869
1420938_at	Hs6st2	-0.61036	0.00034883
1424308_at	Slc24a3	0.332496	0.000348974
1441783_at	2410022M11Rik	0.528571	0.000349255
1431096_at	Ints8	-0.878862	0.000357271
1438300_at	Cdkn2aip	-0.399654	0.000357601
1440536_at	Slc22a5	0.59742	0.000361668
1429169_at	Rbm3	-0.949047	0.000362178
1456735_x_at	Acpl2	0.60654	0.000364909
1440357_at	---	0.489544	0.000371225
1417012_at	Sdc2	-0.530208	0.000371225
1425481_at	Cnot6l	-0.325804	0.000372226
1421233_at	Pknox1	-0.375839	0.000372226
1422159_at	Ppef2	-0.534955	0.000376275
1453263_at	Mak10	-0.488816	0.00038619
1424276_at	Snx16	-0.333417	0.00038619
1441847_at	Mast2	-0.305399	0.000390103
1417045_at	Bid	-0.306392	0.000392851
1431000_at	2310002B06Rik	-0.388955	0.000392991
1431506_s_at	Ppih /// LOC433064 /// LOC629952 /// EG665989 /// LOC666411 /// LOC669441 /// LOC671009 /// LOC676493	-0.352412	0.000396768
1423511_at	Asf1a	-0.470262	0.000402546
1427590_at	Zfp39	0.277796	0.000407491
1425148_a_at	Snx6	-0.493548	0.000420629
1448538_a_at	D4Wsu53e	-0.620635	0.000426674
1453983_a_at	Mett10d	-0.271655	0.000428526
1444402_at	Zc3h12c	-0.397662	0.000432522
1445869_at	---	0.286023	0.000432522
1429315_at	Syt11	0.500314	0.000432522
1452388_at	Hspa1a	-0.973313	0.000432522
1435158_at	Rbm12b	-0.311445	0.000432566
1444560_at	---	-0.38708	0.000432566
1435632_at	Nufip2	-0.308294	0.000436094
1434202_a_at	BC055107	-0.227704	0.000442495
1455930_at	LOC673503	-0.426658	0.000454111
1453473_a_at	Dynlt1 /// LOC671261	-0.266591	0.000456674
1417053_at	Phb /// LOC665511	-0.415715	0.000456674
1444542_at	---	0.48184	0.000456674
1418520_at	Tgoln1	-0.536623	0.000460357
1445713_at	9630041G16Rik	-1.01463	0.00047419
1460676_at	Josd1	-0.307786	0.000488101
1429510_at	2810410L24Rik	0.568057	0.000490333
1425487_at	Slu7	-0.470548	0.000492207
1424904_at	1300010F03Rik	-0.314313	0.0004951
1451177_at	Dnajb4	-0.421206	0.000496297
1452176_at	Nup153	-0.274206	0.000501313
1451345_at	Mtap	-0.383829	0.000504276
1427271_at	Zbtb44	-0.412528	0.000507039
1439174_at	Unc5c	-0.364343	0.000507484
1429078_a_at	Cops7a	-0.295356	0.000511342
1422616_s_at	Wdr54	0.210998	0.000515079
1450089_a_at	Srprb	-0.517473	0.000520124
1427448_at	Rabep1	-0.403329	0.000520484
1438220_at	Foxj3	-0.445332	0.000520484
1428645_at	Gnai3	-0.392883	0.000524842
1450483_at	Gja12	-0.441636	0.0005308
1443285_at	---	-0.300735	0.000537996
1422609_at	Arpp19	-0.477894	0.000546974
1428944_at	Ube1l2	-0.172642	0.000548619
1434984_at	6330514A18Rik	0.392116	0.000556994
1416917_at	1700123O20Rik	-0.363108	0.000563027
1422535_at	Ccne2	-0.5193	0.000563034
1457447_at	Rb1	-0.43437	0.000571122
1434861_at	---	-0.399906	0.000571122
1450154_at	Folh1	-0.40297	0.000573164
1447117_at	Ctnna2	-0.407704	0.000582816
1456415_at	Zfp451	-0.635211	0.000587911
1424589_s_at	Rnpc3	-0.563105	0.000590995
1424620_at	D13Wsu177e	-0.250933	0.000592317
1439470_at	2410025L10Rik	0.284089	0.000592979
1425106_a_at	Wars	-0.615686	0.000599007
1448781_at	Nab1	-0.346191	0.000599574
1454106_a_at	Cxxc1	-0.97536	0.000612963
1456114_at	Cds1	-0.31128	0.000613044
1432646_a_at	EG640370 /// EG667653 /// LOC672953	-1.00025	0.000621389
1436387_at	C330006P03Rik	-1.00358	0.000621622
1437120_at	Snx30	-0.755125	0.000621622
1460510_a_at	Coq10b	-0.705793	0.00062455
1429241_at	Npal3	-0.761118	0.000631936
1425248_a_at	Tyro3	0.356593	0.000635313
1450381_a_at	Bcl6	-0.974702	0.000636742
1416920_at	Rbm4	-0.318029	0.000642535
1436071_at	---	-0.218843	0.000652594
1433462_a_at	Pi4k2a	-0.389355	0.000655892
1440868_at	Gabpb2	0.429231	0.000656643
1429759_at	Rps6ka6	-0.345127	0.000657052
1460466_at	1700047I17Rik /// LOC665155	-0.420234	0.000667432
1447824_x_at	Hspa5	0.331184	0.000669297
1449895_at	Acr	0.371878	0.000669297
1419739_at	Tpm2	0.446914	0.000671761
1452128_a_at	Brcc3	-0.331838	0.000678596
1444478_at	2900057D21Rik	-0.528811	0.000678596
1442168_at	A230071A22Rik	-0.438936	0.00068598
1428654_at	1200016B10Rik	-0.304757	0.000690632
1455171_at	Suv420h1	-0.401961	0.000691921
1453035_at	Lnp	-0.528519	0.000693768
1419996_s_at	Arnt	0.261787	0.000696979
1459861_s_at	Fbxl10	-0.291749	0.000698633
1423418_at	Fdps	-0.519759	0.000702111
1455221_at	Abcg1	0.736753	0.000707053
1429720_at	Mak10	-0.241176	0.00072876
1434142_at	Ppm1d	-0.408526	0.000730204
1439604_at	Adamts16	0.273417	0.00073277
1439426_x_at	Lzp-s	-0.451817	0.000737984
1423559_at	Kcnc1	0.462888	0.000740389
1456551_at	Klf15	-0.267222	0.00074307
1448383_at	Mmp14	0.329199	0.00074307
1418627_at	Gclm	-0.209838	0.00074307
1450064_at	---	0.47748	0.000749097
1417350_at	Pldn	-0.471402	0.000759494
1453198_at	Zfp422-rs1	-0.383649	0.0007623
1421333_a_at	Mynn	-0.535567	0.000775842
1425833_a_at	Hpca	-0.650881	0.000776946
1450172_at	Pknox1	-0.325579	0.000777942
1418703_at	Rbms1	-0.259867	0.000778646
1417888_at	Trim13	-1.10468	0.000788996
1437079_at	Slc18a2	-0.790173	0.000791133
1435046_at	---	0.34257	0.000802606
1422243_at	Fgf7	-0.521624	0.000802955
1429376_s_at	Anapc10	-0.418497	0.000804991
1451730_at	Zfp62	-0.391569	0.000808582
1417403_at	Elovl6	-0.235254	0.000815268
1417712_at	Eif2s2	-0.202988	0.000816861
1421495_a_at	1700052N19Rik	-0.490183	0.000817582
1426503_a_at	Rnf121	-0.384424	0.000822375
1427345_a_at	Sult1a1	-0.372817	0.000822375
1423219_a_at	Mrpl49	-0.329991	0.000826672
1431431_a_at	Nfs1	-0.501119	0.000826672
1435947_at	2810455D13Rik	-0.304636	0.000827966
1435117_a_at	C330021A05Rik	0.219571	0.000829504
1453077_a_at	Snapc3	-0.373988	0.000829838
1426968_a_at	Rdh10	-0.253477	0.000833071
1448890_at	Klf2	-0.730942	0.000834451
1439266_a_at	Polr3k	-0.330675	0.000834451
1419664_at	Srr	-0.589187	0.000834548
1429719_at	Foxp4	0.519857	0.000835856
1440346_at	Jmjd3	-0.515997	0.000844968
1418508_a_at	Grb2	0.554126	0.000844968
1439734_at	---	0.593387	0.00085006
1459808_at	Fkbp4	0.430322	0.000855433
1420607_at	Rbm18	-0.819953	0.000856037
1425824_a_at	Pcsk4	0.493011	0.000856338
1429806_at	Eral1	-0.429231	0.000858364
1416129_at	Errfi1	-0.502499	0.000858732
1436919_at	Trp53i11	0.50327	0.000858732
1438686_at	Eif4g1	-0.695869	0.000869689
1452605_at	Thnsl1	-0.358026	0.000882144
1448185_at	Herpud1	-0.21993	0.00088538
1431789_s_at	Tmed5	-0.625234	0.000902293
1442049_at	Trf	0.752976	0.000907611
1436989_s_at	Slc12a6	-0.545069	0.000914208
1452735_at	Pcnp	-0.315907	0.000914208
1418530_at	Nup160	-0.372115	0.000917183
1453915_a_at	Slc37a3	-0.278881	0.000917183
1431037_a_at	Elavl1	-0.386259	0.000920508
1434364_at	Map3k14	0.466009	0.000920508
1434283_at	Arid5b	-0.387746	0.000922214
1452920_a_at	Ppil2	-0.261631	0.000922214
1449279_at	Gpx2	0.307038	0.000930695
1455624_at	---	0.361165	0.000930695
1454014_a_at	Mkks	-0.274271	0.000935835
1419692_a_at	Ltc4s	-0.302347	0.000935835
1419554_at	Cd47	0.215515	0.000942259
1426383_at	Cry2	0.797953	0.000942259
1448456_at	Cln8	-0.372805	0.000945262
1428954_at	Slc9a3r2	0.474716	0.000945262
1452094_at	P4ha1	-0.499261	0.000945262
1426452_a_at	Rab30	-0.422949	0.000945262
1429061_at	1810063B05Rik	-0.275208	0.000952635
1453257_at	Agpat5	-0.417756	0.000952844
1431484_at	Prrg1	0.481886	0.000954289
1458742_at	Lphn3	-0.317542	0.000954289
1427478_at	Usp12	-0.76318	0.000966071
1424176_a_at	Anxa4	-0.865872	0.000966071
1460400_at	Spast	-0.3087	0.000967455
1423753_at	Bambi	-0.399565	0.000967915
1435339_at	Kctd15	-0.251279	0.000969414
1426646_at	9130011J15Rik	-0.36735	0.00098736
1423560_at	Nell2	0.754253	0.000990683
1433567_at	Gmps	-0.267481	0.00099696
1433661_at	BC034204	0.640977	0.000999562
1426736_at	Gspt1	-0.275811	0.00100819
1456518_at	4930422I07Rik	-0.596027	0.00100884
1457848_at	A930016P21Rik	0.457102	0.00101119
1434414_at	Foxred2	0.295204	0.00102425
1436383_at	Cplx2	0.487148	0.00102425
1417408_at	F3	-0.449865	0.00102545
1431613_a_at	1700024D23Rik	-0.777617	0.00102545
1440210_at	Cacng2	0.181143	0.00103696
1426480_at	Sbds	-0.206362	0.00103696
1439487_at	Lig4	-0.44437	0.00103696
1432713_at	6430709C05Rik	-0.549033	0.00103696
1422471_at	Pex13	-0.317061	0.00104859
1452514_a_at	Kit	0.340698	0.00105912
1416288_at	Dnaja1	-0.515055	0.00106487
1425270_at	Kif1b	-0.636508	0.00106822
1428788_at	1700012G19Rik	0.419702	0.00106822
1453074_at	Dusp23	0.679882	0.00106822
1421862_a_at	Vamp1	-0.708942	0.00106822
1435248_a_at	Btaf1	-0.559521	0.00106822
1418896_a_at	Rpn2	-0.197232	0.00106971
1422702_at	Azin1	-0.465878	0.00106971
1439041_at	Slc39a10	-0.484304	0.00107077
1418003_at	1190002H23Rik	-0.261309	0.00108035
1459245_s_at	Grid2	-1.00876	0.00108247
1459305_at	Zmiz1	0.297751	0.00108319
1453240_a_at	Gcap14	-0.315697	0.0011246
1417982_at	Insig2	-0.409375	0.00113891
1450083_at	Cnot4	-0.460302	0.00113926
1416994_at	Ttc1	-0.503026	0.00114386
1440050_at	Hbs1l	-0.503232	0.00115955
1425281_a_at	Tsc22d3	-0.336036	0.00116786
1431252_a_at	Zfp655	-0.747933	0.00117896
1430519_a_at	Cnot7	-0.392457	0.00119279
1422279_at	Fv1	-0.330318	0.00119308
1458147_at	Mamdc1	-0.555238	0.00119308
1439857_at	---	-0.342814	0.00120392
1437551_at	4930504E06Rik	0.635337	0.00121502
1451264_at	Frmd6	-0.488791	0.00121502
1423143_at	Gtpbp4	-0.346708	0.00123073
1415806_at	Plat	-0.324282	0.00124266
1419365_at	Pex11a	0.370281	0.00124395
1421255_a_at	Cabp1	0.510649	0.00125022
1455702_at	---	0.244388	0.00125038
1429198_at	1810030O07Rik	-0.533835	0.00126498
1423331_a_at	Pvrl3	-0.526852	0.00126863
1449682_s_at	Tubb2b	-0.686947	0.00128451
1419439_at	Stk22s1 /// LOC672873	0.619138	0.00128691
1442599_at	Slc12a9	0.587245	0.00129438
1426242_at	Polr2a	1.37084	0.0013032
1452210_at	Dna2l	-0.499563	0.00133334
1429455_at	Gapvd1	0.576449	0.00134299
1434175_s_at	2210010N04Rik	0.967556	0.00134973
1435965_at	Cnot3	0.40433	0.00136015
1444177_at	EG626058	-0.41095	0.00137124
1438385_s_at	Gpt2	-0.468342	0.00137701
1436176_at	Syt11	-0.708488	0.00138191
1435068_at	Pip5k2b	0.615314	0.00138191
1423512_at	AW209491	-0.28237	0.00138191
1428757_at	Aasdhppt	-0.438345	0.00138191
1451516_at	Rhebl1	-0.479088	0.00138253
1435174_at	Rsbn1	-0.3101	0.00138806
1418020_s_at	Cpd	-0.509363	0.00143642
1435115_at	Fndc5	0.489269	0.00144501
1433883_at	Tpm4	-0.384977	0.00145319
1421818_at	Bcl6	-0.787782	0.00145861
1425358_at	Riok1	0.24142	0.00147748
1420383_a_at	Col4a3bp	-0.354318	0.0015028
1453172_at	Stch	-0.342175	0.00150655
1426001_at	Eomes	-0.60486	0.00151125
1438214_at	Trps1	-0.563108	0.00152731
1431016_at	Cwf19l1	-0.46705	0.00154842
1435249_at	Btaf1	-0.337214	0.00154987
1423452_at	Stk17b	-0.340056	0.00156632
1453988_a_at	Ide	-0.604567	0.00157079
1445669_at	Spry4	-0.446734	0.00157456
1452220_at	Dock1	-0.244804	0.00158479
1426972_at	Sec24d	-0.333149	0.00159935
1439774_at	Prrx1	-0.567212	0.0016082
1460724_at	Ap2a1	0.598773	0.00162439
1415765_at	Hnrpul2	-0.387856	0.00162774
1439077_at	Zxda /// LOC668171	-0.325501	0.00163325
1443701_at	BC025575	0.341975	0.00163409
1450860_at	Lap3	-0.300769	0.00163448
1453668_at	3110052M02Rik	-0.473271	0.00163511
1423904_a_at	Pvr	-0.324545	0.0016545
1456469_x_at	Lasp1	0.402535	0.0016545
1415868_at	Cct4	-0.333245	0.00166654
1421312_a_at	Kifc2	0.479397	0.00166654
1436332_at	Hspb6	0.430441	0.00166922
1424667_a_at	Cutl1	0.645538	0.00167418
1437772_s_at	Fuca1	-0.431029	0.00167418
1424838_at	A330049M08Rik	0.416649	0.0016769
1418584_at	Ccnh /// LOC672655	-0.42903	0.00168894
1420976_at	Man1a2	-0.623625	0.00169556
1451344_at	Tmem119	0.338735	0.00170686
1441157_at	C230006B20	0.424945	0.00171889
1444318_at	Chchd7	-0.515117	0.00172992
1455387_at	Nufip2	-0.44855	0.00175038
1426187_a_at	Hax1	-0.383222	0.00175335
1439300_at	---	-0.508179	0.00175859
1449348_at	Mpp6	-0.48147	0.00175919
1453623_a_at	Rad23a	-0.652525	0.00177872
1424332_at	Rab40c	-0.859253	0.00177936
1455372_at	Cpeb3	-0.364779	0.00178561
1450295_s_at	Pvr	-0.945225	0.00179925
1443962_at	Tfdp2	-0.327062	0.00180023
1422764_at	Mapre1	-0.312868	0.00180851
1449300_at	Cttnbp2nl	-0.513148	0.00181397
1442434_at	D8Ertd82e	-0.494654	0.00181866
1455166_at	AW146430	-0.266615	0.00181866
1431686_a_at	Gmfb	-1.30989	0.00182624
1433107_at	---	0.40828	0.00182823
1424677_at	Cyp2j9	-0.26695	0.00183301
1449956_at	Prkce	0.544364	0.00183374
1423720_a_at	Sar1a	-0.741959	0.00183779
1415843_at	Gbl	-0.575229	0.00184133
1427831_s_at	Zfp260 /// LOC635007	-0.745367	0.00186549
1436508_at	2410014A08Rik	-0.452567	0.00191059
1448820_a_at	Eif2s2	0.464312	0.00191718
1440179_x_at	Ibrdc1	-0.392997	0.00192029
1427891_at	Gimap6	-0.416597	0.00193605
1427640_a_at	Runx1t1	-0.278234	0.00193684
1435369_at	Fastkd5	-0.558457	0.00195579
1433481_at	Fkbp14	-0.314372	0.00196328
1452262_at	Grpel2	-0.279823	0.00196661
1429088_at	Lbh	0.543374	0.00200071
1452200_at	D11Ertd497e	-0.252059	0.00203092
1424859_at	Homer3	0.525083	0.00203826
1449523_at	Bcl7c	0.460907	0.00203972
1417983_a_at	Ube2v2	-0.35324	0.00206351
1423721_at	Tpm1	0.591078	0.00207917
1417602_at	Per2	-0.508179	0.00208579
1439031_at	Jph4	0.460575	0.00209331
1428541_at	3321401G04Rik	0.189285	0.00209338
1428198_at	Adal	-0.244956	0.00209543
1434750_at	Exoc3	-0.220981	0.00209962
1426402_at	Syncrip	-0.322897	0.00209962
1424500_at	Utp6	-0.54299	0.00209962
1440562_at	---	0.75647	0.00210308
1445400_at	Hbxip	0.322408	0.00210586
1437363_at	Homer1	-0.419598	0.00211997
1435110_at	Unc5b	0.315818	0.00211997
1439326_at	Lnpep	-0.437239	0.00212253
1449217_at	Casp8ap2	-0.305718	0.00214098
1426810_at	Jmjd1a	-0.360957	0.00214098
1425577_at	9830124H08Rik	-0.146518	0.0021664
1420508_at	Sema3f	0.279688	0.00217416
1429148_at	Nfic	0.715528	0.00217485
1451675_a_at	Alas2	-0.588449	0.00218835
1422959_s_at	Zfp313	-0.592616	0.0021904
1426090_a_at	Fert2	-0.503254	0.00220931
1436089_at	Ints6	-0.503345	0.00221798
1417624_at	Nab1	-0.265363	0.00226223
1425349_a_at	Myef2	-0.450789	0.00226223
1448545_at	Sdc2	-0.257494	0.00227001
1423026_at	Rad51c	-0.840869	0.00227706
1452261_at	Shprh	-0.384558	0.00228733
1436372_a_at	2210010A19Rik	-0.522554	0.00231581
1428124_at	Gtf2e1	-0.328611	0.00232043
1448772_at	Ube2a	-0.260402	0.00232336
1431278_s_at	Pla2g6	-0.664173	0.00233372
1451115_at	Pias3	0.291903	0.00233372
1443859_at	Rsbn1	-0.763886	0.00233372
1435867_at	---	-0.309156	0.00236841
1448586_at	Hspa14	-0.263868	0.00236958
1426683_at	Cnot6	-0.474662	0.0023746
1435877_at	Stk38l	-0.434515	0.0023746
1451196_at	Ypel5	-0.234649	0.00237514
1453102_at	Flrt3	0.315786	0.00237613
1450997_at	Stk17b	-0.360974	0.00238151
1425206_a_at	Ube3a	-0.825784	0.00240488
1435574_at	Chordc1	-0.776661	0.00240491
1421949_a_at	Ccdc123	-0.404008	0.00243012
1424918_at	Tbc1d19	-0.366271	0.00243643
1425462_at	Fbxw11	0.171446	0.0024432
1460577_at	AA591059	-0.504692	0.00245172
1440071_at	Magi1	0.342136	0.00245204
1416501_at	Pdpk1	-0.554197	0.00245902
1426081_a_at	Dio2	-0.490624	0.00246859
1440286_at	Fbxl16	0.579955	0.00248575
1453024_at	Wdr37	-0.35233	0.00250785
1459848_x_at	Dbh	0.40678	0.00250902
1418667_at	2410002O22Rik	-0.476161	0.00252228
1444667_at	Brdt	0.623075	0.00252349
1452100_at	Dullard	0.404385	0.00252728
1450376_at	Mxi1	-0.276979	0.00253701
1426425_at	Sugt1	-0.274706	0.00254423
1451723_at	Cnot6l	-0.4554	0.00254676
1422798_at	Cntnap2	-0.382931	0.00254676
1451805_at	Phip	-0.961044	0.00256311
1431923_at	Aifm3	0.209973	0.00256315
1434466_at	Atcay	-0.297166	0.00258052
1432272_a_at	Ercc4	-0.81965	0.00258571
1429373_x_at	Crtc2	0.333949	0.00262759
1424891_a_at	Zw10	-0.207001	0.00264765
1434730_at	AI854517	0.495078	0.002657
1424778_at	Reep3	-0.492482	0.00265878
1437584_at	Ccnd3	-0.505098	0.00266064
1455285_at	Slc31a1	-0.820826	0.00266064
1449491_at	Card10	0.292386	0.00267015
1420873_at	Twf1	-0.621121	0.00267162
1433746_at	Wdr3	-0.468124	0.00267721
1450044_at	Fzd7	0.363195	0.0026869
1442601_at	Gmeb1	0.404769	0.0026915
1427153_at	Bckdhb	-0.26493	0.0026915
1448302_at	Kctd20	-0.466232	0.00269314
1425030_at	Zfp622	-0.299773	0.00269852
1419553_a_at	Rabggtb	-0.352521	0.00270277
1441333_at	Trps1	-0.714614	0.002716
1434520_at	Sc5d	-0.335823	0.00271663
1421534_at	Dfna5h	-0.359915	0.00273809
1417540_at	Elf1	-0.432405	0.00273809
1436792_at	Whdc1	0.480057	0.00274041
1448435_at	Pcqap	0.568812	0.00274705
1460439_at	BC033915	0.223974	0.00274958
1443869_at	E430028B21Rik	-0.44297	0.00277653
1442471_at	---	0.442389	0.00278133
1433547_s_at	Nudcd1	-0.278569	0.00279011
1423795_at	Sfpq	-0.271497	0.00279295
1426785_s_at	Mgll	0.262372	0.00279946
1457186_at	Tbl1xr1	-0.48964	0.00280846
1441573_at	Scmh1	-0.391911	0.00281478
1429165_at	3110001I22Rik	-0.632731	0.00282436
1460278_a_at	D15Wsu75e	-0.386125	0.00283006
1418366_at	Hist2h2aa1 /// Hist1h2ad /// Hist1h2an /// Hist2h2ac /// Hist2h2aa2 /// Hist2h2ab	-0.688317	0.00284407
1444499_at	---	-0.871484	0.00285359
1424343_a_at	Eif1a	-0.345967	0.0028573
1453032_at	2610109B12Rik	-0.370922	0.00286301
1424136_a_at	Ppih /// LOC433064 /// LOC624822 /// EG665989 /// EG667598 /// LOC669441 /// LOC670964 /// LOC676493	-0.357562	0.00286875
1420973_at	Arid5b	-0.921487	0.00287296
1427194_a_at	Ercc8	-0.289647	0.00287624
1429462_at	Slc25a32	-0.544435	0.00287624
1419805_s_at	Ggps1	-0.430342	0.0029198
1429444_at	Rasl11a	-0.354718	0.00292307
1452162_at	Wdr48	-0.466912	0.00294622
1450722_at	Nup50	-0.351574	0.0029499
1428025_s_at	Pitpnc1	-0.562926	0.00296563
1434780_at	C130038G02Rik	0.246588	0.00296882
1434706_at	Vcpip1	-0.638152	0.0029695
1428449_at	Gtf3c2	0.399308	0.00297013
1429204_at	Camk2n2	0.450986	0.00297696
1423459_at	Cops2	-0.309777	0.00297698
1426478_at	Rasa1	-0.493529	0.00300072
1437527_x_at	Mcl1	-0.352402	0.00303252
1429479_at	6430590I03Rik	0.301027	0.00303565
1434161_at	5830457H20Rik	-0.266516	0.00305005
1418136_at	Tgfb1i1	0.63025	0.00305326
1427289_at	Ddhd1	-0.316346	0.00306097
1447559_at	AI834762	0.453613	0.00306345
1452921_at	B130050I23Rik	0.255561	0.00306928
1454612_at	Rkhd2	-0.444258	0.00306928
1454239_at	4930578G10Rik	0.55113	0.00306992
1417681_at	Nudt21	-0.350528	0.00309087
1451996_at	Tm2d1	-0.412189	0.00310487
1430798_x_at	Mrpl15	0.32824	0.00314489
1440984_at	Baz2b	-0.610168	0.00314516
1440237_at	Ercc4	0.421625	0.00315527
1426625_at	Zfp623	-0.177546	0.00315722
1454011_a_at	Rpa2	-0.388474	0.00316102
1457642_at	5730507N06Rik	-0.357396	0.00317545
1420975_at	Baz1b	-0.662825	0.00318424
1452160_at	Tiparp	-0.525873	0.00318424
1460716_a_at	Cbfb	-0.236081	0.00318699
1456473_x_at	Arf2	-0.515791	0.00320323
1437868_at	BC023892	-0.40526	0.00321532
1419350_at	Hook2	0.400076	0.0032209
1418969_at	Skp2	-0.377283	0.00322751
1456620_at	Gnptab	-0.307326	0.0032442
1460235_at	Scarb2	-0.264587	0.00327926
1459843_s_at	Smad1	-0.430606	0.00327926
1423394_at	Pcyox1	0.301606	0.00332232
1456878_at	AI646023	0.32847	0.00334583
1442570_at	---	-0.990665	0.00336045
1448880_at	Ube2l3	-0.362285	0.00336079
1456973_at	Arid5b	-0.786596	0.0033845
1456900_at	---	0.327742	0.00339621
1418746_at	Pnkd	0.359188	0.00340082
1450576_a_at	Sf3a2	0.670887	0.00340082
1428771_at	2410127E18Rik	-0.725535	0.00342238
1436633_at	LOC667668	0.441025	0.00342238
1417033_at	Ube2g2	-0.562307	0.00342396
1444477_at	Ctnna3	-0.453126	0.00344475
1438672_at	Parvb	0.440142	0.00344475
1451350_a_at	Leprot	-0.341176	0.00345606
1435049_s_at	AI854703	0.261338	0.00346576
1426249_at	Adrbk1	0.394538	0.00346576
1421204_a_at	Nudt16	0.42176	0.00346642
1436244_a_at	Tle2	0.422431	0.00347881
1418290_a_at	Ezh1	-0.848792	0.00347892
1455857_a_at	Rab2b	-0.600379	0.00347892
1456755_at	Trak1	0.696895	0.0034854
1436010_at	BC036313	0.51535	0.00348975
1446434_at	Galnact2	0.323413	0.00350275
1422579_at	Hspe1 /// EG628438 /// LOC636088	-0.365592	0.00351238
1420497_a_at	Cebpz	-0.221911	0.00351642
1449054_a_at	Pcbp4	0.334324	0.00351992
1434448_at	Txlna	-0.427646	0.00354257
1419224_at	Cecr6	0.610494	0.00357306
1427241_at	Papolg	-0.255153	0.0035948
1432504_at	1700106N22Rik	-0.373669	0.0035948
1448400_a_at	Smarcd2	-0.42151	0.00360442
1436229_at	BC049806	-0.401887	0.00366217
1451536_at	Mtfr1	-0.478476	0.00366778
1449325_at	Fads2	-0.734814	0.00367009
1424271_at	Dcamkl1	-0.389204	0.00367123
1426754_x_at	Ckap4	0.53841	0.00367281
1445706_x_at	---	0.25447	0.00368825
1423089_at	Tmod3	-0.809098	0.00370324
1435894_at	C030014L02	0.257185	0.00370732
1451813_at	Oprk1	0.654916	0.00370732
1451346_at	Mtap	-0.296395	0.00372029
1433633_at	Irf2bp2 /// LOC672960	-0.560101	0.00372568
1439395_at	9630025I21Rik	-0.418815	0.00373009
1451355_at	Asah3l	-0.785926	0.0037678
1419372_at	Gosr2	-0.453877	0.00377694
1458636_at	2610206B13Rik	-0.600954	0.00377976
1449408_at	Jam2	-0.310104	0.00379388
1445137_at	Ptk2	0.444711	0.00381819
1423660_at	Ctdsp2	-0.510652	0.00384127
1427376_a_at	Map4k5	-0.425441	0.00384127
1431015_at	Tmem129	-0.392969	0.00388158
1427279_at	---	0.412323	0.00392911
1443816_s_at	BB220380	0.29446	0.0039615
1454931_at	Eid2	0.340761	0.00401315
1430942_at	8430437O03Rik	0.335816	0.00402424
1415860_at	Kpna2 /// LOC670551 /// LOC671639	-0.367927	0.00402798
1422508_at	Atp6v1a	0.446562	0.00405289
1438754_at	---	0.663211	0.00405585
1437622_x_at	Mrpl28	-0.359263	0.00405984
1426361_at	Zc3h11a	-0.363042	0.00405984
1427410_at	Dleu2	-0.637785	0.00406466
1458364_s_at	Ifrg15	0.510213	0.00407711
1426235_a_at	Glul	-0.430166	0.00408354
1450903_at	Rad23b	0.761146	0.00409581
1433014_at	6330436F06Rik	-1.06846	0.00409914
1440086_at	Rnf182	-0.407214	0.00411519
1448063_at	Iqsec2	0.518349	0.00414957
1445922_at	Xrcc4	0.363632	0.0041915
1434398_at	Nkrf	-0.381075	0.00419993
1456531_x_at	Prpf19	-0.277644	0.00420282
1456592_at	Vps13a	-0.516944	0.00421189
1454819_at	---	-0.482339	0.00423417
1435185_at	Lrrcc1	0.269535	0.00425691
1444285_at	Morf4l1	0.520882	0.00430422
1457040_at	Lgi2	0.574003	0.0043147
1436917_s_at	Gpsm1	-0.295275	0.004331
1452947_at	Gprc5c	-0.563562	0.00436997
1436317_at	D230012E17Rik	-0.447431	0.00438016
1434635_at	Rph3a	0.642881	0.00439135
1420513_at	Efcab2	-0.379763	0.0044015
1443306_at	---	0.414556	0.00441119
1437137_at	6430550H21Rik	-0.693089	0.00441234
1440867_at	Spry4	-0.412016	0.00445369
1444184_at	Alkbh3	0.390468	0.00447773
1436790_a_at	Sox11	-0.412181	0.00447791
1452228_at	Tbc1d23	-0.510022	0.004545
1441198_at	Zfp39	0.412592	0.00454543
1447448_s_at	Klf6	-0.453184	0.00454951
1458669_at	---	0.427969	0.00458757
1440992_at	3110052M02Rik	-0.361937	0.00459233
1451041_at	Rock2	-0.26992	0.00460888
1437418_at	---	-0.261363	0.00460888
1460688_s_at	AA407659	-0.245059	0.00462856
1456476_at	Atxn2l	0.602682	0.00470406
1416718_at	Bcan	0.380006	0.00470406
1449173_at	Mpp2	0.524072	0.00471027
1450391_a_at	Mgll	0.388985	0.00472117
1434481_at	4121402D02Rik	0.354126	0.00473804
1421112_at	Nkx2-2	0.551594	0.00476344
1419206_at	Cd37	0.450025	0.00476981
1433653_at	BC029169	-0.212935	0.00478416
1416929_at	Rbm12	-0.475618	0.00479191
1449494_at	Rab3c	-0.434338	0.00483731
1450915_at	Ap3b1	-0.499818	0.00485595
1433972_at	Camta1	0.300804	0.00487097
1415828_a_at	D3Ucla1	-0.645601	0.00487263
1443175_at	A830010M09Rik	-0.265039	0.00490135
1449911_at	Lag3	0.295052	0.00490488
1427190_at	2900057D21Rik	-0.407279	0.00493516
1438714_at	Zfp207	-0.580205	0.00493946
1439143_at	A930018M24Rik	-0.322875	0.0049423
1420596_at	Cacng2	0.251385	0.00495366
1460275_at	Gpr3	-0.304917	0.0049574
1459985_at	Wdr61	-0.281887	0.00496825
1423718_at	Ak3	-0.289162	0.00497462
1448206_at	Psma2	-0.262093	0.00497462
1448682_at	Dynll1	-0.345043	0.00497618
1448913_at	Smarcd1	0.566444	0.00497618
1416184_s_at	Hmga1	0.340489	0.00499033
1431608_at	Als2	-0.707707	0.00503379
1458509_at	Mre11a	-0.563194	0.00504799
1426237_at	Sp2	0.930195	0.00505748
1432236_a_at	Suv39h1	-0.469493	0.00506384
1426356_at	6330578E17Rik	-0.583211	0.00506384
1427039_at	Epn1	0.600118	0.00508425
1418591_at	Dnaja4	-0.344505	0.00513188
1456822_at	Rad23b	-0.576472	0.00514258
1425018_at	Mcts1	-0.297052	0.0051667
1424924_at	Sec63	-0.351615	0.00516922
1426873_s_at	Jup	0.582028	0.00520097
1434419_s_at	Tardbp	-0.601099	0.00522314
1451406_a_at	Pcsk5	0.405667	0.00525006
1439061_at	Ccdc84	-0.538608	0.00525221
1436228_at	---	0.328751	0.00526007
1431026_at	Nat12	-0.510088	0.0052625
1427663_a_at	Clk4	-0.436136	0.00526387
1448879_at	Ube2l3	-0.457647	0.00526398
1423158_at	Gnpnat1	-0.546393	0.0052923
1447996_at	AI848149	-0.941346	0.00532835
1460063_at	D5Ertd798e	-0.418231	0.00533943
1420963_at	Hapln2	-0.351673	0.00533974
1444341_at	8030451F13Rik	-0.933052	0.00534589
1432014_at	6530409C15Rik	0.327664	0.00536746
1448317_at	Tmem128	-0.196158	0.00537446
1417792_at	Zfml	-0.43881	0.00537776
1432004_a_at	Dnm2	-0.691292	0.00539749
1450387_s_at	Ak3l1	-0.35369	0.00539966
1422533_at	Cyp51	-0.371445	0.00539966
1421569_at	Grid1	0.390473	0.00540562
1450728_at	Fjx1	0.277217	0.00540706
1418899_at	Ufm1	-0.531295	0.00541528
1423167_at	Prei3	-0.455826	0.00543751
1455672_s_at	Cplx2	0.363578	0.00543833
1423104_at	Irs1	-0.293773	0.00543903
1439740_s_at	Uck2	0.485045	0.00543903
1430536_a_at	Erh	-0.316663	0.0054511
1458353_at	A230063L24Rik	0.417966	0.00545111
1452886_at	---	-0.755577	0.00547067
1450661_x_at	Nfic	0.436352	0.00547389
1429730_at	1810009N02Rik	0.717891	0.00549881
1437005_a_at	Rpl18	-0.237005	0.00549881
1423305_at	Extl1	-0.328463	0.00552877
1428233_at	Cpsf6	-0.471655	0.00553601
1433155_at	B230204H03Rik	0.654143	0.00553601
1451028_at	Baiap2	0.464162	0.00558174
1418248_at	Gla	-0.385092	0.00558957
1446934_at	---	0.632583	0.00559997
1447585_s_at	Mrps6	-0.329217	0.00565237
1446804_at	Nxn	0.416088	0.00565573
1446386_at	Tcf4	0.421452	0.00565812
1426165_a_at	Casp3	-0.457493	0.00568613
1437799_at	4933407H18Rik	0.528997	0.00570304
1447062_at	Vps24	0.416464	0.00572349
1454669_at	Tmem11	-0.310901	0.00573699
1421922_at	Sh3bp5	-0.414818	0.00573856
1450535_at	Krtap12-1	0.412266	0.00573974
1450401_at	Tgs1	-0.374857	0.00574622
1431003_a_at	2610002J02Rik	0.228281	0.00575426
1434777_at	Mycl1	0.254406	0.00576243
1447589_at	Ppp4r1	0.437381	0.00577412
1428232_at	Cpsf6	-0.307444	0.00581729
1436925_at	Ches1	0.500633	0.00585095
1425796_a_at	Fgfr3	-0.826101	0.00589109
1434705_at	Ctbp2 /// Zranb1	-0.232251	0.00590217
1427152_at	Qser1	-0.485682	0.00591268
1440026_at	Trps1	-0.51376	0.00594231
1457875_at	Hcfc1	0.376041	0.00595479
1426699_at	AU040320	-0.442483	0.00596216
1424014_at	2900092E17Rik	0.357105	0.00596216
1449055_x_at	Pcbp4	0.378085	0.00596451
1422501_s_at	Idh3a	-0.424926	0.00596451
1456381_x_at	Mcl1	-0.319296	0.00597135
1450320_at	4931432E15Rik	0.395824	0.00597216
1427510_at	Gnai1	-0.554799	0.00599552
1435218_at	Rasgef1a	0.47187	0.00599552
1449079_s_at	St3gal6	-0.445194	0.00599855
1433944_at	Hectd2	-0.428834	0.00602236
1439550_at	---	0.462863	0.00606363
1426809_at	C430004E15Rik	0.385677	0.00606363
1456463_at	A230106M20Rik	0.395933	0.00606517
1425920_at	Cuedc1	0.657344	0.00608372
1441492_at	Zfp64	0.340343	0.00608372
1418865_at	Zfp385	0.685436	0.00611015
1440400_at	---	0.42043	0.00615463
1451105_at	Vash2	0.451202	0.00618619
1429079_a_at	2310045N01Rik	-0.321924	0.00619164
1432140_at	Gsdm2	0.484199	0.00620279
1416343_a_at	Lamp2	-0.495618	0.00620279
1428048_at	BC027582	0.572662	0.00625689
1431507_a_at	Synj2bp /// 1810020G14Rik	-0.382528	0.00625814
1452831_s_at	Ppat	-0.260651	0.00628222
1437667_a_at	Bach2	0.512647	0.00628963
1426837_at	Metap1	-0.462179	0.0063139
1446380_at	9430076C15Rik	-0.446765	0.00633668
1450428_at	Lhx1	0.633689	0.00633818
1418178_at	Ina	0.479485	0.00639146
1460614_at	Mier3	-0.340149	0.00642466
1451927_a_at	Mapk14	-0.746836	0.00643404
1450910_at	Cap2	-0.231849	0.00645854
1428210_s_at	Chuk	-0.344607	0.00645854
1460687_at	Setd8	0.498999	0.00648027
1457093_at	Gapvd1	0.203627	0.00648849
1449376_at	Nicn1	-0.366585	0.00653717
1418828_at	Thex1	-0.324992	0.00654553
1428187_at	Cd47	0.486717	0.00654703
1445402_at	Adk	-0.598589	0.0065701
1457433_x_at	Zfp120	0.355631	0.00659107
1460191_at	Ykt6	-0.709288	0.00662318
1430090_at	Ccdc28b	-0.448828	0.00663269
1453106_a_at	Rnmt	-0.233469	0.006642
1416511_a_at	Cdc42ep4	0.308991	0.00666866
1440390_at	BC025575	-0.951146	0.00666866
1455033_at	B430201A12Rik	-0.323072	0.00666866
1458613_at	Arrdc1	0.446559	0.00666866
1439892_at	Brsk1	0.542004	0.00683263
1452226_at	Rcc2	-0.419574	0.00686884
1438640_x_at	Pgk1 /// LOC433594 /// LOC665053 /// LOC668435	-0.34125	0.00690697
1433983_at	Cnksr3	-0.396381	0.00690943
1430418_at	Tmem57	-0.201938	0.00690943
1426241_a_at	Scmh1	0.304251	0.00695076
1423616_at	Tarbp2	0.363918	0.00700925
1419656_at	Slc25a36	-0.469607	0.00703844
1423337_at	Orc4l	-0.442366	0.00703844
1447221_x_at	Fgf14	0.66083	0.00704802
1426842_at	Ythdf3	-0.452461	0.0070751
1437733_at	Eif4ebp2	0.619824	0.00708967
1449618_s_at	2900092E17Rik	0.273542	0.0071697
1444207_at	Alms1	-0.602547	0.00718236
1458912_at	Rbm6	-0.594586	0.00718694
1428783_at	Prkar2a	-0.228424	0.00718856
1418067_at	Cfl2	-0.19374	0.00722586
1420588_at	Spinlw1	0.310782	0.00726149
1427146_at	AI790298	0.304021	0.00729757
1423958_a_at	Ttc33	-0.253316	0.00730265
1457518_at	C630004H02Rik	0.332191	0.0073814
1455463_at	Phyhip	0.765699	0.00739111
1430719_at	4833447P13Rik	0.439431	0.00739682
1450916_at	Stau2	0.404443	0.00739682
1422564_at	Actl6b	0.459495	0.00747322
1452316_at	Ints12	-0.414086	0.00748972
1437744_at	Slitrk4	-0.316431	0.0075321
1433835_at	Ppp3cb	-0.313224	0.0075321
1435918_at	BC055107	-0.319643	0.0075541
1419027_s_at	Gltp	0.295193	0.00756833
1441508_at	---	0.315651	0.00756833
1436184_at	Gm632	0.315676	0.00760339
1450372_a_at	Rpl18	-0.330777	0.00763524
1421997_s_at	Itga3	0.398473	0.00763941
1423669_at	Col1a1	0.564937	0.00770168
1437861_s_at	---	0.503828	0.00771163
1424992_at	Tprkb	0.545249	0.00775539
1434593_at	Eif5a2	-0.402593	0.00780501
1434908_at	AI480556	0.641013	0.00781909
1456325_at	Cep68	-0.359917	0.0078287
1431136_at	Rab36	-0.383498	0.00783677
1439398_x_at	Nelf	0.529151	0.00785178
1421680_at	A030005L19Rik	0.437248	0.00785447
1426269_at	Sybl1	-0.294691	0.00787968
1421164_a_at	Arhgef1	0.530688	0.00790577
1449880_s_at	Bglap-rs1 /// Bglap1 /// Bglap2	0.380051	0.00791301
1453755_at	Lsm11	-0.50765	0.00794829
1424670_s_at	Zfyve21	-0.365363	0.00796108
1455461_at	A530017D24Rik	0.233959	0.00796798
1424861_at	D930016D06Rik	-0.281708	0.00798874
1448559_at	Flot1	0.286645	0.00798973
1436236_x_at	Cotl1	0.283233	0.00800145
1425362_at	Hrbl	0.355445	0.00802844
1415893_at	Sgpl1	-0.628774	0.00805175
1455659_at	---	0.36386	0.00805684
1460287_at	Timp2	-0.473479	0.00805703
1450646_at	Cyp51	-0.354974	0.00811252
1459909_at	Nfix	0.901753	0.00813458
1436952_at	Klf9	-0.996139	0.00814217
1440041_at	Tgfbr3	0.431979	0.00814217
1419452_at	Uchl5	-0.269948	0.00815914
1433839_at	Nars2	-0.330711	0.00822832
1436509_at	2410014A08Rik	-0.306639	0.00825202
1428171_at	Prpf39	-0.225219	0.0083267
1436839_at	---	-0.408867	0.00833318
1460560_at	Bahcc1	0.461956	0.00839947
1456408_x_at	4933439C10Rik	0.230864	0.00841825
1450178_at	Brdt	-0.326911	0.00844931
1419505_a_at	Ggps1	-0.465645	0.00846464
1452772_at	Tnks2	-0.814182	0.00850243
1446833_at	Dock9	0.403507	0.00852317
1425862_a_at	Pik3c2a	-0.507045	0.00852629
1427476_a_at	Trim32	0.910901	0.00854927
1417168_a_at	Usp2	-0.332396	0.00856743
1421346_a_at	Slc6a6	0.51143	0.00859038
1457256_x_at	Ptch2 /// LOC674483	0.262174	0.00863709
1444679_at	Phf21a	0.432393	0.00863709
1435096_at	Ric8b	-0.184191	0.00863955
1427414_at	Prkar2a	-0.54457	0.00866599
1436659_at	Dcamkl1	-0.227862	0.00866858
1458664_at	---	0.522636	0.00868192
1450757_at	Cdh11	-0.270256	0.00868452
1418581_a_at	Limk2	-0.215335	0.00868452
1445204_at	Ccdc85a	-0.377789	0.00868452
1459403_at	Ldlr	0.722493	0.00868667
1423037_at	Agtrl1	0.4675	0.00868667
1425570_at	Slamf1	0.434297	0.00868747
1456683_at	Sltm	0.323989	0.00868802
1446906_at	C81615	-0.529251	0.00874006
1452192_at	BC053440	-0.315718	0.00874006
1450957_a_at	Sqstm1	-0.165675	0.00877401
1421114_a_at	Epyc	0.571654	0.00879079
1450664_at	Gabpa	-0.35265	0.00888977
1440770_at	Bcl2	-0.999964	0.008897
1443170_at	---	0.594303	0.0089196
1445186_at	Stc2	0.461299	0.00893837
1434524_at	Eif2b3	-0.274773	0.00895186
1445062_at	Elovl6	-0.52132	0.00895186
1440540_at	Gle1l	0.429991	0.00895223
1435711_at	---	0.933754	0.00904047
1428383_a_at	2310021P13Rik	0.642689	0.00906146
1424724_a_at	D16Ertd472e	-0.566833	0.00910259
1438085_at	A230048G03Rik /// LOC670614	-0.851979	0.00916882
1430041_at	6330548G22Rik	-0.420358	0.00917955
1452768_at	Tex261	0.730054	0.00918208
1420614_at	Dynlt3	-0.258334	0.00918879
1427050_at	5730420B22Rik	-0.225287	0.00918879
1433772_at	Stch	-0.4885	0.00919407
1453520_at	Ttc21b	-0.380291	0.00926595
1436535_at	Trove2	-0.299339	0.00927227
1435619_at	---	0.343756	0.00927227
1440479_at	Cbx4	0.324136	0.00931801
1439400_x_at	5430433E21Rik	0.356923	0.00935451
1452161_at	Tiparp	-0.427724	0.00940878
1429884_at	Srgap2	0.218559	0.00945549
1448055_at	Fndc7	0.366798	0.00947349
1453307_a_at	Anapc5	-0.368537	0.00948689
1443520_at	AU022870	0.746423	0.00953987
1446675_at	Adk	0.395373	0.00955218
1438516_at	Rif1	-0.432275	0.00955417
1429009_at	Snrp70	0.51787	0.00955767
1454635_at	Fbxl3	-0.237841	0.00956377
1450841_at	Stt3a	-0.388109	0.00958084
1423309_at	Tgoln1	-0.168822	0.00958117
1455955_s_at	Snx17	-0.196253	0.00958641
1437017_at	AI480653	-0.250523	0.00965958
1418235_at	Atg5	-0.502207	0.00967031
1429951_at	Ssbp2	-0.548272	0.00977094
1433724_at	D15Ertd621e	-0.33802	0.00979796
1439075_at	Polr3f	0.325849	0.00979796
1449044_at	Eef1e1	-0.28978	0.00983569
1437729_at	Rpl27a	-0.980738	0.009839
1428616_at	Zfp131	-0.368475	0.00985859
1424767_at	Cdh22	0.227483	0.00986881
1418045_at	Inpp1	-0.259642	0.00987974
1435119_at	---	-0.361283	0.00990255
1446972_at	D15Wsu126e	-0.585405	0.00991286
1458142_at	Zdhhc9	-0.335459	0.0099959
1442264_at	Rasgrp2	0.419451	0.0100208
1424076_at	Gdpd1	-0.285877	0.0100208
1439741_x_at	Uck2	0.48862	0.0100366
1423561_at	Nell2	0.886215	0.0100455
1456243_x_at	Mcl1	-0.331491	0.0100456
1456772_at	Ncf1	0.475384	0.010059
1448404_at	Scamp2	-0.248209	0.0100847
1419180_at	Bcl9l	0.526963	0.0100912
1416835_s_at	Amd1 /// Amd2	-0.564678	0.0101078
1436999_at	5033414K04Rik	0.283832	0.0101099
1421697_at	Ush2a	0.699532	0.01013
1453739_at	Tmem126b	-0.384412	0.01013
1452806_at	1500016O10Rik	0.447652	0.01013
1455397_at	Caskin1	0.414096	0.01013
1446928_at	Dnajc17 /// LOC638909	0.535806	0.0101412
1451199_at	Qtrtd1	-0.335679	0.0101463
1452612_at	Zfp294	-0.347674	0.0101619
1422752_at	Polr3k	-0.279987	0.0102438
1422512_a_at	Ogfr	-0.59238	0.0102632
1435449_at	Bcl2l11	-0.562243	0.0102885
1441472_at	Arid3b	0.357913	0.0103195
1420542_at	ORF28	-0.510227	0.0103632
1440838_at	AI852064	0.528864	0.01041
1432143_a_at	Hbp1	-0.622674	0.0104306
1416601_a_at	Dscr1	-0.820701	0.0104375
1424696_at	Gpr89	-0.251371	0.0104411
1448864_at	Snrk	0.326612	0.0104853
1428288_at	Klf9	-0.29615	0.0104968
1443312_at	Rfx4	0.378061	0.0105159
1450519_a_at	Prkaca	0.506496	0.010555
1448028_at	Tbc1d24	0.4669	0.0105814
1418611_at	Gpr162	0.231263	0.0105835
1456614_at	Acn9	-0.340512	0.0105933
1451642_at	Kif1b	-0.34043	0.0106007
1449336_a_at	Slk	-0.621911	0.0106007
1448930_at	3010026O09Rik	0.325506	0.0106698
1416543_at	Nfe2l2	-0.624614	0.0106876
1452633_s_at	LOC637741	0.461979	0.0106971
1450212_at	Fmnl1	0.394246	0.0107448
1441545_at	9230115F04Rik	-0.405691	0.0107448
1416816_at	Nek7	0.267922	0.0107504
1442905_at	Arf4	0.411805	0.0107504
1453582_at	Chka	-0.507407	0.0107504
1450725_s_at	Car14	-0.442982	0.0107511
1453550_a_at	Mlstd2	-0.643794	0.0107512
1421045_at	Mrc2	0.515639	0.0107769
1432329_a_at	Matk	-0.468491	0.0108038
1428838_a_at	Dck	-0.636712	0.0108137
1449362_a_at	Mink1	0.677347	0.0108381
1436288_at	1700049M11Rik	0.285745	0.0109005
1459181_at	---	0.471876	0.0109311
1450023_at	Gtpbp1	0.268573	0.0109363
1425512_at	---	0.592933	0.0109463
1421957_a_at	Pcyt1a	-0.260456	0.0109587
1454120_a_at	Pcgf6	-0.440484	0.0109666
1417937_at	Dact1	-0.323407	0.0110023
1455905_at	2610507B11Rik	-0.671602	0.0110349
1435598_at	---	0.304072	0.0110733
1445002_at	---	0.335704	0.0110831
1425187_at	Sel1l	-0.374121	0.0111313
1455942_at	Fbxl11	0.51592	0.0111555
1423370_a_at	Csnk1g2	0.207043	0.0111555
1419415_a_at	Rarg	0.423455	0.0112194
1427790_at	Mapkapk5 /// Adam1a	-0.288569	0.0113275
1453620_at	3010022N24Rik	0.622199	0.0113593
1434203_at	BC055107	-0.280632	0.011378
1435784_at	Atg9a	0.45667	0.0113786
1421074_at	Cyp7b1	-0.429775	0.0114326
1439610_at	Rab27b	-0.475449	0.0114555
1456057_x_at	Tmem109	-0.27924	0.0114932
1436600_at	Tnrc9	-0.495372	0.0115321
1418053_at	Sncb	0.821653	0.0115333
1419054_a_at	Ptpn21	0.843102	0.0115402
1431035_at	Daam1	-0.813331	0.0115595
1423222_at	Cap2	-0.5394	0.011598
1449855_s_at	Uchl3 /// Uchl4	-0.372509	0.0116388
1457251_x_at	Adcy1	0.339	0.0116817
1453125_at	Sox11	-0.461241	0.0117499
1451474_a_at	Parp8	-0.347305	0.0117872
1436851_at	Ptger1 /// Pkn1	0.375909	0.0117919
1439776_at	Ogfod1	-0.896114	0.0118009
1456962_at	Cntn2	-0.394745	0.0118159
1428507_at	Hdhd2	-0.490915	0.0118173
1435788_at	2900086B20Rik	0.260645	0.0118539
1421054_at	Xpo4	-0.708395	0.0118776
1452203_at	Obfc2a	-0.456652	0.0120881
1418701_at	Comt	0.540493	0.0121014
1450309_at	Astn2	1.01704	0.0121287
1448026_at	---	0.535992	0.0121425
1433632_at	Irf2bp2 /// LOC672960	-0.404148	0.012143
1455739_at	EG245190	0.380272	0.012153
1434550_at	3830406C13Rik	-0.437046	0.0121701
1431167_at	Dgkg	0.404018	0.0122036
1426592_a_at	Fbxo22	0.161541	0.0122083
1424235_at	Ormdl2	-0.364706	0.0122287
1452789_at	Snn	0.438286	0.0122909
1417771_a_at	Psmc6	-0.242933	0.0122988
1449342_at	Ptplb	-0.318587	0.0123156
1428974_s_at	Lztfl1	-0.352052	0.0123186
1455622_at	Podxl2	0.482289	0.012339
1434507_at	Npepl1	0.476814	0.0123476
1418322_at	Crem	-0.484351	0.0124139
1451561_at	Prr12	0.72741	0.0124155
1423209_at	---	-0.402536	0.012421
1452708_a_at	Luc7l	-0.648373	0.012438
1455979_at	Arid1b	0.266221	0.0124466
1428192_at	Kbtbd7	-0.307279	0.0124952
1422712_a_at	Ube2i	-0.300791	0.0125135
1415845_at	Syt4	0.378112	0.012559
1433921_s_at	Dph3	-0.363305	0.0125954
1458385_at	Hspa4l	-0.407118	0.0126784
1446152_at	Lass6	-0.56244	0.0127003
1443875_at	Gm603	0.382575	0.0127293
1420741_x_at	2310069N01Rik	0.347169	0.0128062
1437641_at	4930535B03Rik	-0.568275	0.0128064
1416366_at	LOC675851	-0.323084	0.0128098
1419489_at	AW049604	0.235005	0.0128249
1424216_a_at	Papola	-0.455998	0.0128804
1440882_at	Lrp8	-0.355102	0.0128947
1450106_a_at	Evl	0.394931	0.0129253
1418214_at	Klc2	0.826833	0.0129632
1438079_at	BC050078	0.425282	0.0130002
1417994_a_at	Accn1	0.285863	0.0130007
1425557_x_at	Tsc22d3	-0.298811	0.0130209
1420089_at	Nfkbia	-0.351859	0.0131147
1429197_s_at	Rabgap1l	-0.471627	0.0131147
1442408_at	Sulf2	-0.69083	0.0131178
1424081_at	Pcgf6	-0.184779	0.0131187
1433971_at	Camta1	0.398966	0.01314
1456947_at	Pafah1b1	0.240361	0.01314
1427291_at	Sycp1	-0.437425	0.0131924
1426936_at	2610305J24Rik /// BC005512 /// LOC215866 /// LOC629242 /// EG630153 /// EG630525 /// LOC631386 /// LOC637482 /// LOC641366 /// EG668904 /// LOC669019 /// LOC669231 /// LOC669436 /// LOC670270 /// LOC670719 /// LOC672061 /// LOC672196 /// LOC672939 /// LOC	0.968446	0.0132068
1440461_at	0910001A06Rik	-0.337239	0.0132733
1419244_a_at	Rab14	0.353636	0.0133599
1417576_a_at	Otub2	-0.712978	0.0133718
1455369_at	Apba1	0.685255	0.013455
1429245_at	2510022D24Rik	0.401827	0.0134741
1436685_at	EG544888	0.497973	0.0135442
1441003_at	Ercc4	0.281692	0.013548
1437235_x_at	Lpp	0.336011	0.0135677
1416985_at	Sirpa	0.340741	0.0135744
1451672_at	Gprk6	0.209317	0.0135858
1417904_at	Dclre1a	0.284674	0.0136701
1458286_at	0610007P14Rik	0.396694	0.013679
1453746_at	Fnbp1	0.367154	0.0136829
1459735_at	Fkbp15	0.313951	0.0136972
1416091_at	Mtap4	0.353762	0.0136972
1456351_at	Brd8	0.364604	0.0136975
1425993_a_at	Hsp110	-0.415454	0.0137053
1421415_s_at	Gcnt2	-0.551161	0.0137508
1456944_at	Kcnc1	0.351948	0.0139417
1431089_at	Cpsf2	-0.368246	0.0139487
1428382_at	Smarcc2	0.51553	0.013972
1439833_at	3-Sep	0.525843	0.0140123
1437696_at	BC049807	-0.431858	0.0140614
1449531_at	Leprel2	0.39914	0.0141291
1423073_at	Cmpk	-0.169376	0.0142014
1456688_at	Top2b	-0.92586	0.0142517
1452661_at	Tfrc	0.275787	0.0142517
1419185_a_at	Mlxipl	0.524516	0.014282
1422500_at	Idh3a	-0.451838	0.01429
1455567_at	Crkrs	0.58929	0.0142937
1460739_at	Zmiz2	0.416162	0.0143246
1416881_at	Mcl1	-0.492875	0.0143288
1458162_at	---	0.434767	0.0143521
1452440_at	Tnfsf12 /// Tnfsf12-tnfsf13	0.245642	0.0145669
1436550_at	Fbxo30	-0.501673	0.0145739
1423148_at	Skp1a	-0.227712	0.0145857
1423566_a_at	Hsp110	-0.376794	0.0146311
1445499_at	Zc3h13	-0.31631	0.014648
1421424_a_at	Anpep	0.744915	0.0146947
1417320_at	Grpel1	-0.333137	0.0147091
1437739_a_at	5430432N15Rik	0.367618	0.0147101
1434736_at	Hlf	0.305018	0.0147101
1452788_at	Ppp2r5e	-0.409299	0.0147183
1449078_at	St3gal6	-0.351639	0.0147766
1429363_at	Vps37a	-0.497048	0.0147995
1425050_at	Isoc1	-0.300182	0.0148048
1425964_x_at	Hspb1	-0.38627	0.0148636
1427400_at	Lbx1	0.491219	0.0149126
1436580_at	---	0.277853	0.0149408
1428409_at	Nat13	-0.284279	0.0149662
1452187_at	Rbm5	-0.504116	0.0149707
1442224_at	Plekha6	0.602983	0.0149996
1456637_at	Lrrtm2	-0.901134	0.0150113
1438073_at	Spry3	-0.229968	0.0150117
1432108_at	Pcgf6	-0.322407	0.0150677
1442822_at	Camk4	-0.806324	0.0150677
1437894_at	Prox1	-0.672917	0.015085
1428708_x_at	Ptms	0.505542	0.0150918
1426509_s_at	Gfap	0.810788	0.0150969
1427173_a_at	Mrps33	-0.254097	0.0150969
1426901_s_at	Camta2	0.411215	0.0151885
1434661_at	Syngr1	0.333537	0.0152562
1443890_at	---	0.289325	0.0152603
1455158_at	Itga3	0.437963	0.0152603
1445969_at	---	0.386549	0.0152844
1442324_at	Tmem181	0.48319	0.0152933
1419099_x_at	Stom	-0.786343	0.0152933
1417902_at	Slc19a2	-0.319021	0.0153187
1424002_at	Pdcl3	-0.262425	0.0153738
1438340_at	A930006D11Rik	0.69962	0.0153907
1449865_at	Sema3a	-0.651941	0.0154441
1456492_at	9130404D08Rik	0.639746	0.0154944
1417931_at	Ndst2	0.236552	0.015564
1425933_a_at	Nt5c2	-0.418979	0.0156932
1424757_at	BC018242	0.346282	0.0156932
1455883_a_at	Lrrtm1	-0.547541	0.0157256
1455516_at	---	-0.275394	0.0157573
1436842_at	B230380D07Rik	-0.27647	0.0157588
1457872_at	Pde4b	0.357057	0.0158008
1440005_at	Onecut2	0.362376	0.0158325
1425511_at	Mark1	-0.23271	0.0158587
1448156_at	Tff1	0.314866	0.0158652
1452685_at	0610009O20Rik	0.394443	0.0159015
1441771_at	Atrx	-0.441927	0.0160268
1418326_at	Slc7a5	0.659396	0.0160268
1433769_at	Als2cl	0.34116	0.0160743
1455320_at	---	-0.283272	0.0161273
1454963_at	E430028B21Rik	-0.344486	0.0161657
1458238_at	Arid5b	-0.564854	0.0161835
1428223_at	Mfsd2	-0.3414	0.016201
1445440_at	A430106J12Rik	-0.348413	0.0162116
1434228_at	Ppm2c	-0.262734	0.0163037
1423107_at	Ube2b	-0.290899	0.0163479
1452573_a_at	9330134C04Rik	-0.273841	0.0163682
1418651_at	Spata6	-0.369018	0.0164202
1456163_at	2700049P18Rik	-0.323501	0.0164348
1428487_s_at	Coq10b	-0.533599	0.0164483
1434787_at	Arf3	0.276836	0.0164672
1419679_at	Lats2	-0.703405	0.016534
1451147_x_at	Csdc2	0.530845	0.0166147
1456824_at	Zfp612	-0.249605	0.0166439
1447624_s_at	Stox2	-0.348201	0.0166495
1435026_at	Spock2	0.81484	0.0166858
1456829_at	Pnma3	0.516732	0.0166882
1450936_a_at	Dnase1l2	-0.551784	0.0166943
1428139_at	Tmem180	0.353937	0.0167857
1457375_at	---	0.372219	0.0168597
1450161_at	Ikbkg	-0.490472	0.0168816
1416062_at	Tbc1d15	-1.01568	0.0169447
1439797_at	Ppard	0.519825	0.0169473
1448374_at	Med28	0.426911	0.0169899
1457229_at	Gpr173	0.498516	0.0169943
1435956_at	Frmd5	-0.334443	0.0170287
1418572_x_at	Tnfrsf12a	-0.392612	0.0170582
1423140_at	Lip1	0.849166	0.0171092
1433801_at	9930012K11Rik	0.476102	0.017122
1445720_at	Sltm	-0.415258	0.0172212
1424553_at	Gup1	0.276138	0.017249
1420117_at	---	-0.644038	0.0173308
1417751_at	Stk10	0.202478	0.0173422
1458401_at	4932438A13Rik /// LOC671298 /// LOC676099	-0.677632	0.0174274
1428551_at	Trmt11	-0.285105	0.0174387
1455792_x_at	Ndn	-0.280137	0.0174456
1442864_at	Esrra	0.3388	0.0175366
1425968_s_at	Speg	0.380122	0.017594
1423740_a_at	Rbm10	-0.356238	0.0176287
1444069_at	---	0.563924	0.0176817
1435152_at	Leng8	0.989081	0.0177189
1441521_at	Cacnb2	0.521402	0.017785
1455773_at	---	-0.595051	0.0177896
1446937_at	Bptf	0.377823	0.0177954
1415748_a_at	Dctn5	-0.236321	0.0178868
1430138_at	Cd3eap	0.358989	0.0179734
1428506_at	Atic	-0.247277	0.0179734
1432410_a_at	Bmp7	-0.452385	0.0179981
1440989_at	---	-0.327596	0.0180667
1440903_at	Herc1	-0.371812	0.0180934
1419182_at	Svep1	0.374773	0.0180934
1456698_s_at	Hnrpdl	0.321979	0.0181569
1451287_s_at	2810003C17Rik	0.384452	0.018181
1418623_at	Rab2	-0.858893	0.0182166
1417235_at	Ehd3	0.285575	0.0183747
1448790_at	Sema6b	0.377681	0.0183962
1450933_at	Pde7a	-0.342564	0.0184158
1425182_x_at	Klk1b22 /// Klk1b9	1.23928	0.0184599
1455363_at	Bai1	0.457578	0.0184845
1455779_at	---	0.542039	0.0185783
1442149_at	Tbc1d16	0.437274	0.0185968
1438094_x_at	Gtpbp9	-0.23265	0.0186006
1460249_at	Lnx2	-0.395129	0.0186115
1460094_at	---	0.486418	0.0186243
1422073_a_at	Celsr2	0.510316	0.0187038
1457312_at	Nhlrc2	0.333793	0.0187038
1418202_a_at	Wiz	0.5055	0.0187211
1440067_at	Ncam1	-0.435552	0.0188239
1415746_at	Cic	0.33006	0.0189711
1453171_s_at	Ppm1a	0.186746	0.0190879
1446474_at	---	0.433221	0.0190974
1433613_at	---	-0.242958	0.0191495
1419247_at	Rgs2	-0.530783	0.0192125
1457090_at	---	0.354674	0.0192517
1434250_at	Pak2	-0.563897	0.0192604
1419880_x_at	---	0.345223	0.0192704
1441511_at	Kcnt1	0.317959	0.0192867
1436399_s_at	Nrk	0.600401	0.0194799
1439224_at	Ankib1	-0.819494	0.0195977
1432067_at	4930473O22Rik	0.387311	0.019727
1415999_at	Hey1	-0.253066	0.0197644
1422307_at	---	-0.682438	0.0197876
1429170_a_at	Mtf1	-0.38163	0.0198348
1457692_at	---	0.306448	0.019846
1447143_at	Phf14	-0.365955	0.0198614
1447294_at	Fbxw11	-0.552563	0.0198678
1424640_at	Arl8a	0.612215	0.0198842
1420752_at	Dtx3	0.557035	0.0198842
1436622_at	Iqsec2	0.406851	0.0198842
1438160_x_at	Slco4a1	-0.566768	0.0198889
1445147_at	Psme4	-0.697564	0.0199122
1436177_at	---	0.41209	0.0199803
1455089_at	Gng12	-0.330653	0.0199826
1424926_at	Sec63	-0.544557	0.020049
1425884_at	Bxdc1	-0.58568	0.0200623
1434115_at	Cdh13	0.362241	0.020071
1433617_s_at	B4galt5	0.342864	0.0200742
1449620_s_at	D16Wsu65e	0.230862	0.0200752
1432539_a_at	Nup54	-0.638536	0.0200934
1460341_at	Plekhb2	-0.177945	0.0201293
1441275_at	Kbtbd8	-0.563482	0.0201296
1455057_at	Gmps	0.306006	0.0201296
1444975_at	Chchd6	0.332313	0.0203101
1447915_x_at	BC054438	-0.371165	0.0203101
1423845_at	Csdc2	0.490001	0.0203381
1445727_at	Ube3a	-0.563115	0.020348
1442761_at	Tpd52l2	-0.629679	0.0203596
1436155_at	Nmnat2	0.395901	0.020366
1455357_x_at	Tomm20	-0.247038	0.0204041
1434309_at	Fntb	0.404527	0.0204145
1428724_at	Pcf11	0.363744	0.0204692
1430566_at	4733401A01Rik	-0.56684	0.0204692
1422906_at	Abcg2	-0.329457	0.0204743
1417233_at	Chchd4	-0.297799	0.0205456
1459722_at	Zswim6	-0.629603	0.020562
1455518_at	---	0.583961	0.0206371
1432016_a_at	Idh3a	-0.324409	0.0208205
1426885_a_at	Cdk2ap1	0.325589	0.0208205
1416032_at	Tmem109	0.835422	0.0208628
1449966_s_at	Cab39l	-0.661539	0.0208674
1428707_at	Ptms	0.53687	0.0208738
1423321_at	Myadm	0.364857	0.0209246
1428127_at	4921506J03Rik	-0.373869	0.0209246
1448370_at	Ulk1	0.329192	0.0209465
1460593_at	Susd4	0.21142	0.0210715
1455548_at	Dlgap4	0.278616	0.0211211
1424345_s_at	Ube2m	0.424645	0.0211211
1452235_at	Man1b1	0.561072	0.0212199
1424983_a_at	2700078E11Rik	-0.390435	0.0212397
1442328_at	---	0.649465	0.0213184
1448502_at	Slc16a7	-0.431621	0.0213274
1451891_a_at	Dysf	0.362905	0.0213532
1448806_at	Mmp24	0.304488	0.0213821
1439209_at	Tcf12	-0.361042	0.0214383
1449653_at	---	-0.601	0.0214383
1453713_s_at	4930546H06Rik	0.442687	0.0214383
1455753_at	C630035N08Rik	0.617955	0.0214383
1439441_x_at	Lats2	-0.394148	0.0214404
1434833_at	Map4k2	0.452562	0.0214752
1440097_at	Mirg	0.686379	0.0214852
1429239_a_at	Stard4	-0.907584	0.0214852
1429224_at	Pnma1	0.519961	0.0215452
1448516_at	Tsn	0.250106	0.0216435
1424373_at	Armcx3	-0.398738	0.0216764
1450010_at	Hsd17b12	-0.71816	0.0217373
1458849_at	Asah2	0.353803	0.021768
1451465_at	Ubl7	0.488782	0.0219014
1458089_at	Fkbp5	-0.428421	0.0219014
1449194_at	Mrps25	-0.458696	0.0219179
1457235_at	Lrp1b	-0.808136	0.0219968
1443779_s_at	Lcor	-0.34609	0.0219968
1434825_at	Tnrc18	0.392337	0.0219968
1436216_s_at	2610204M08Rik	0.357663	0.0220148
1424327_at	3200002M19Rik	-0.25975	0.0221542
1426717_at	Nipa2	-0.246019	0.022216
1428355_at	Osbp2	0.300148	0.0222634
1416249_at	Nadk	-0.33783	0.0222921
1421184_a_at	Mettl7a /// Ubie /// LOC554292	-0.674056	0.0223949
1438667_at	5730410E15Rik	-0.299004	0.0224072
1435626_a_at	Herpud1	-0.285856	0.0224072
1445247_at	C530044C16Rik	0.465754	0.0224209
1416488_at	Ccng2	-0.381772	0.0224209
1458958_at	Nope	0.31329	0.0224275
1452658_at	Krr1	-0.56625	0.0225477
1441478_at	9930013L23Rik	0.317873	0.0225606
1458230_at	---	0.337148	0.0225653
1434547_at	Cpd	-0.33116	0.0226605
1429753_at	Nxph4	0.396243	0.0227102
1434424_at	9630055N22Rik /// LOC670389	-0.338598	0.02276
1452462_a_at	Banp	-0.341404	0.0229139
1415867_at	Cct4	-0.305295	0.0229534
1442701_at	---	-0.497118	0.0229732
1437434_a_at	Gpr177	-0.320028	0.0230412
1432064_at	Ubox5	0.370955	0.0230695
1439269_x_at	Mcm7 /// LOC433027	-0.355047	0.0231527
1423256_a_at	Atp6v1g1 /// LOC666030 /// LOC671155 /// LOC671196	-0.235205	0.0232466
1439062_at	Kbtbd3	-0.528792	0.023318
1420922_at	Usp9x	-0.410357	0.023345
1418152_at	Nsbp1	-0.471908	0.0235745
1450067_a_at	1810034K20Rik	-0.384928	0.0236108
1460092_at	Lsamp	-0.362443	0.0236416
1451828_a_at	Acsl4	-0.727201	0.0236416
1448740_at	2400006H24Rik	-0.354783	0.0237118
1417240_at	Zyx	0.345976	0.0238009
1437118_at	Usp7	-0.620981	0.0242091
1451422_at	Myo18a	0.389975	0.024227
1437281_x_at	Xab2	0.373971	0.024227
1419743_s_at	Carm1	0.455076	0.0243407
1453107_s_at	Foxm1 /// Pebp1 /// 4933413G19Rik	0.409398	0.0243419
1452383_at	---	-0.82174	0.0243508
1428457_at	5830472M02Rik	-0.286458	0.0244554
1424472_at	Nol6	0.52452	0.0244554
1427343_at	Rasd2	1.05706	0.0246431
1440526_at	D130029J02Rik	0.497621	0.0246628
1459038_at	---	-0.781153	0.0247089
1415844_at	Syt4	0.448495	0.0247322
1431889_x_at	Psg21	0.408961	0.0247589
1436923_at	Rab2b	-0.599962	0.024894
1457434_s_at	Ptpla	-0.339354	0.0249457
1425806_a_at	Surb7	-0.371724	0.0250145
1455328_at	Accn2	0.328442	0.0250605
1440274_at	Rapgef4	0.512562	0.0250792
1451663_a_at	Trim3	0.348758	0.0250955
1425266_a_at	Rap1gds1	0.323313	0.0252117
1436468_at	Zdhhc8	0.26483	0.0252125
1455143_at	Nlgn2	0.722003	0.025309
1438327_at	Zfp533	-0.605822	0.0253289
1422675_at	Smarce1	-0.311884	0.0253599
1439192_at	Nova2	0.514545	0.0256163
1421498_a_at	2010204K13Rik	-0.327726	0.0256319
1422403_at	Ifna1 /// Ifna2 /// Ifna4 /// Ifna5 /// Ifna6 /// Ifna7 /// Ifna9 /// Ifnab /// OTTMUSG00000011275 /// OTTMUSG00000007655 /// Ifna12 /// LOC384100 /// Ifna14	0.408569	0.025637
1458740_at	Cntnap5a	0.395042	0.0257233
1456346_at	Dnm1	0.630924	0.025815
1421225_a_at	Slc4a4	0.46337	0.025849
1426870_at	Fbxo33	-0.520597	0.0258822
1457290_at	Mab21l1	0.476319	0.0259059
1434059_at	B230312A22Rik	0.381447	0.0259347
1437943_s_at	Mea1	-0.341531	0.0260908
1447569_at	1700081L11Rik	-0.593555	0.0260908
1437841_x_at	Csdc2	0.458556	0.0260995
1446284_at	Mtss1	0.624294	0.0262746
1448280_at	Syp	0.587719	0.026284
1452835_a_at	Polrmt	0.318845	0.026365
1445188_at	Gphn	0.769375	0.0264288
1442643_at	Jmjd3	0.377511	0.026478
1428945_at	Ube1l2	-0.377033	0.0264884
1451898_a_at	Sema6c	0.333628	0.0265099
1442138_at	Gpr62	0.312576	0.0265195
1437033_a_at	Skp2	-0.397266	0.0265504
1425004_s_at	Mocs1	0.468294	0.0266091
1441535_at	Mllt3	-0.671772	0.0267617
1451079_at	Adpgk	1.05941	0.0267908
1418332_a_at	Agtpbp1 /// LOC671356	0.280092	0.0268957
1428055_at	Rian	-0.420371	0.0269173
1438659_x_at	Chchd6	-0.372634	0.0269531
1456564_at	C030046I01Rik	0.265535	0.0270198
1459595_at	---	0.664222	0.0271081
1449245_at	Grin2c	0.4484	0.0271271
1437008_x_at	Tmem109	-0.226126	0.0271293
1441356_at	Shc2	0.348549	0.0271734
1458350_at	Opa3	0.494878	0.0271901
1441360_at	Rps6ka3	-0.464584	0.0272098
1421394_a_at	Birc4	-1.24262	0.0272957
1425979_a_at	Fbf1	0.3141	0.0274413
1450162_at	Dpf3	-0.417417	0.0274832
1456874_at	Flrt2	-0.500073	0.0275423
1448203_at	Atp5l	-0.2463	0.0275441
1456553_at	Zcchc11	-0.348715	0.0275559
1449515_at	Zfp292	-0.246706	0.0276106
1429491_s_at	Rif1 /// LOC671598	-0.410797	0.0276484
1445991_at	Lhfp	-1.3369	0.0276484
1456162_x_at	Add3	0.432854	0.0277327
1438959_x_at	---	0.403481	0.0277327
1442631_at	2700070H01Rik	0.725609	0.0277327
1455136_at	Atp1a2	0.575896	0.0277843
1455061_a_at	Acaa2	-0.555841	0.0278347
1446080_at	Cutl2	0.320806	0.0279055
1453296_at	Tmem103	0.29685	0.027906
1424720_at	Mgat4b	0.210859	0.0279343
1434658_at	3110056O03Rik	0.27944	0.0280556
1416641_at	Lig1	0.280712	0.0281043
1423388_at	Ap1g1	-0.356342	0.0281759
1455336_at	Thap2	-0.379459	0.0282391
1450662_at	Tesk1	0.264541	0.0283063
1433733_a_at	Cry1	-0.375311	0.0283078
1442945_at	2010109K09Rik	-0.547749	0.0284546
1425894_at	Mrgprf	0.309798	0.0284798
1455700_at	Mterfd3	0.229202	0.0285534
1427103_at	Plekhq1	0.536042	0.0285534
1450231_a_at	Birc4	-1.06611	0.0286085
1428341_at	Zfp655	-0.396892	0.0287529
1458149_at	---	0.461652	0.0287653
1431803_at	Cyp2d13	0.326803	0.0287691
1430589_at	Pigh	-0.800237	0.0288343
1457623_x_at	Trp53	0.3053	0.0289797
1442750_at	---	-0.387111	0.0290056
1426360_at	Zc3h11a	-0.581036	0.0290363
1420687_at	4932438H23Rik	0.315688	0.0290576
1438272_at	Csmd3	-0.334216	0.0290756
1439657_at	LOC319980	0.407833	0.0291292
1448690_at	Kcnk1	-0.333576	0.029148
1448825_at	Pdk2	0.343129	0.0291602
1427584_at	Amot	-0.711377	0.0291634
1426692_at	Ccdc97	0.566392	0.0291726
1418371_at	Dynll2	-0.567718	0.0292679
1440861_a_at	---	0.733935	0.0293053
1434967_at	Zswim6	-0.463572	0.0294812
1419667_at	Sgcb	-0.431158	0.0295043
1452817_at	Smyd3	-0.252315	0.0295136
1433768_at	Palld	-0.306683	0.0295424
1418518_at	Furin	0.321085	0.0295424
1440350_at	---	0.451491	0.0295822
1437854_at	Lrrc18	0.452418	0.029611
1446979_at	Dcps	0.408779	0.0296315
1447763_at	---	-0.603725	0.0296823
1448356_at	Ube2d2	-0.210643	0.029792
1424274_at	Vdp	-0.402006	0.0299003
1456960_at	Adk	-0.559699	0.0299013
1441572_at	C030036D22Rik	-0.369145	0.0299013
1446323_at	---	0.454056	0.0300414
1427573_at	Chic1	-0.557327	0.0301341
1450920_at	Ccnb2	-0.669003	0.0303146
1416133_at	C920006C10Rik	0.47213	0.0303305
1460610_at	9430057O19Rik	0.528283	0.0304405
1437317_at	Ube1l	0.347128	0.0306344
1442524_at	---	0.558978	0.0306385
1457842_at	Zfp292	-0.35626	0.0306394
1438803_s_at	Snx16	-0.456215	0.0308779
1434138_at	Prune	0.330472	0.030956
1423967_at	Palm	0.443764	0.0310058
1443248_at	Tmco3	0.356827	0.0310223
1423750_a_at	Sf1	0.394572	0.0311785
1420575_at	Mt3	0.790768	0.0312076
1459911_at	Cdr2l	0.304792	0.0312076
1423840_at	Ccdc56	-0.383492	0.0312388
1431841_at	4930434E21Rik	0.395181	0.0312737
1435044_at	Ebf4	0.323571	0.0312737
1429124_s_at	Rexo1	0.227815	0.0312946
1426053_a_at	Xpr1	-0.477664	0.0313369
1435195_at	Vash1	0.354766	0.0313369
1440248_at	Casc4	-0.715211	0.0313789
1446226_at	Fancb	0.298306	0.0314656
1442671_at	Hip2	-0.424329	0.0315503
1442164_at	Blzf1	0.453526	0.0316385
1435495_at	Adora1	0.454903	0.0317628
1428730_at	Krit1	-0.704363	0.0319642
1449003_a_at	Vti1b	-0.251554	0.0319668
1422635_at	Ache	0.39111	0.0320136
1446418_at	Atg7	0.361553	0.0320186
1448882_at	Tmem93	-0.300051	0.0320742
1451388_a_at	Atp11b	0.314959	0.0320778
1430395_at	Ankrd45	-0.653044	0.0320875
1439583_x_at	D130029J02Rik	0.434152	0.0320875
1457758_at	Eny2	0.932107	0.0321724
1456699_s_at	A730098D12Rik	-0.320143	0.0321784
1455937_at	Lrrtm4	-0.315361	0.0322226
1424386_at	Reep2	0.33333	0.0322239
1422621_at	Ranbp2	-0.316811	0.0322911
1416560_at	Slc13a3	0.352299	0.0322926
1416841_at	1110059E24Rik	-0.326959	0.0323654
1448711_at	Mcm3ap	0.323718	0.0323743
1451592_at	P42pop	0.632399	0.0324822
1421993_a_at	Tmem134	0.441185	0.0324881
1432158_a_at	Trappc2	-0.235544	0.0325002
1428160_at	Ndufab1	-0.781308	0.0325061
1436702_at	Nat8l	0.446867	0.0327642
1440425_at	---	-0.281978	0.0328522
1454777_at	Slco2b1	0.361842	0.0328522
1428497_at	Secisbp2	-0.413496	0.0329136
1437518_at	---	-0.383913	0.032942
1449202_at	Sema4g	0.701434	0.0330118
1459628_at	Zmat4	0.642346	0.0331104
1424986_s_at	Fbxw7	0.249002	0.0331254
1441744_at	---	0.63745	0.0331254
1420961_a_at	Ivns1abp	-0.639211	0.0331349
1416332_at	Cirbp	0.552498	0.0331701
1452937_s_at	Ccdc28b	-0.405751	0.0331864
1419901_at	---	0.341363	0.03325
1449117_at	Jund1	0.404841	0.0333825
1451611_at	Hrasls3	-0.386646	0.033413
1454046_x_at	Pgs1	0.292061	0.0335052
1430590_at	D3Ertd751e	-0.490038	0.0335525
1423661_s_at	Ctdsp2	-0.48497	0.033562
1430062_at	1600002O04Rik	0.501776	0.0336805
1447929_at	Ssh3	0.579273	0.0337007
1434701_at	AW215868	-0.389746	0.0337962
1427047_at	Nup188	0.296328	0.0339074
1422769_at	Syncrip	-0.595094	0.0339453
1433985_at	Abi2	0.321151	0.0339453
1451484_a_at	Syn1	0.384971	0.0339825
1433951_at	Arl5a	-0.254152	0.0339983
1436665_a_at	Ltbp4	0.392133	0.0339983
1440964_s_at	AI465270	0.392003	0.0340357
1434287_at	Agpat5	-0.355688	0.0341373
1434893_at	Atp1a2	0.531799	0.034217
1447280_at	Dtna	-0.496474	0.0343921
1437394_at	Centg2	0.529066	0.0344388
1428143_a_at	Pnpla2	0.250699	0.0346235
1444864_at	D12Ertd125e	0.338977	0.0346392
1436703_x_at	Snapc2	0.222299	0.0346988
1437686_x_at	Cutl1	0.384826	0.0348964
1415897_a_at	Mgst1	-0.362546	0.0348964
1427110_at	Raver1	0.548278	0.0348964
1438277_at	E130308A19Rik	-0.34365	0.0350618
1455215_at	C530028O21Rik	0.566787	0.0352819
1459183_at	LOC666048	0.363292	0.0353709
1458340_at	---	0.485729	0.0355574
1428996_at	4833426J09Rik	0.447593	0.035563
1439477_at	Ube2b	0.421991	0.0355928
1434470_at	Syt13	0.452673	0.0356259
1424137_at	Gprin1	0.497924	0.0356318
1459440_at	Nav3	-0.365765	0.0357
1445731_at	Pik3cb	0.454869	0.0357077
1443269_at	D130009B15Rik	0.410046	0.0357813
1452608_at	Mycbp	-0.470352	0.0358167
1452871_at	Neil1	0.316746	0.035939
1418832_at	Pkp3	-0.484431	0.0360667
1421145_at	Slc26a2	0.660471	0.0361938
1423294_at	Mest	-0.349747	0.0362244
1448761_a_at	Copg2	-0.391516	0.0362833
1437474_at	Gatad2b	0.182975	0.0363559
1436000_a_at	Skp2	-0.468482	0.0365226
1425859_a_at	Psmd4	-0.26154	0.0365383
1425760_a_at	Pitpnm1	0.249827	0.0365383
1433032_at	2900064K03Rik	-0.553266	0.0369169
1439848_at	Bves	0.593047	0.0372355
1460637_s_at	Pfdn5	-0.258057	0.0372355
1421152_a_at	Gnao1	0.303971	0.0374936
1430195_at	2810043O03Rik	-0.531399	0.0377124
1454788_at	Arl4c /// LOC632433	0.368613	0.0378061
1442815_at	Pex19	0.323123	0.0379693
1421887_a_at	Aplp2	0.245244	0.0379693
1455352_at	AU023006	0.284184	0.0379693
1459883_at	---	-0.352061	0.038087
1455417_at	Kcnj11	0.368091	0.0381175
1451636_at	Ankrd33	0.309885	0.0382029
1442678_at	Ccdc28b	-0.483174	0.0383032
1454978_at	Ttyh3	0.784907	0.038539
1437309_a_at	Rpa1	-0.250024	0.038539
1428835_at	Myh14 /// LOC672865	0.296272	0.0386876
1432304_a_at	9030624J02Rik	-0.54305	0.0387206
1436613_at	---	0.710357	0.0388268
1434049_at	Entpd3	0.431128	0.0389082
1455701_at	Snx26	0.819542	0.0389206
1424220_a_at	Porcn	0.293917	0.0389573
1426025_s_at	Laptm5	0.664465	0.0389573
1460705_at	Rps6kb1	-0.363582	0.0392597
1458396_at	P2rx3	0.500486	0.0393035
1456800_a_at	D130029J02Rik	0.604339	0.0394257
1460406_at	AI427122	-0.328524	0.0395399
1435623_at	Tmem118	0.450994	0.0395499
1423841_at	Bxdc2	-0.469623	0.0397655
1432447_a_at	2310005N01Rik	-0.288044	0.039814
1451800_at	Gcc2	-0.840551	0.0399312
1438668_x_at	Atxn2l	0.448777	0.0404122
1430253_at	2900006B11Rik	0.451763	0.0405553
1458689_at	Atg10	0.445369	0.0408055
1447485_at	Gpr150	0.914886	0.0408681
1433897_at	AI597468	-0.365541	0.0408681
1427458_at	Bmp1	0.623427	0.0408847
1431380_at	5730409L17Rik	-0.677906	0.0408847
1452055_at	Ctdsp1	0.408092	0.0409134
1446470_at	---	0.43494	0.04094
1451289_at	Dcamkl1	-0.451139	0.0410544
1435183_at	Tbkbp1	0.327015	0.0411125
1441905_x_at	Snrpn	-0.280986	0.0411852
1451303_at	BC002230	0.34535	0.0413182
1418980_a_at	Cnp1	0.340005	0.041327
1433642_at	Arl15	-0.334647	0.0414087
1427385_s_at	Actn1	0.596668	0.0414102
1452801_at	Pigk	-0.476411	0.0414693
1428577_at	Ppfia4	0.468481	0.0415696
1438182_x_at	Asb6	0.399231	0.041576
1423221_at	Tubb4	0.353877	0.0423766
1430411_at	6330525I24Rik	0.456559	0.0424937
1425734_a_at	Ccdc77	-0.677596	0.0424994
1436355_at	Fads6	0.393952	0.0427949
1422528_a_at	Zfp36l1	0.511532	0.0430693
1435949_at	Zc3h3	0.338477	0.0430888
1458800_at	Tnrc6c	0.562763	0.0434147
1419186_a_at	St8sia4	-0.434328	0.0435885
1418468_at	Anxa11	0.835851	0.0436464
1430318_at	Sat2	0.400671	0.0437079
1451969_s_at	Parp3	0.761032	0.0438172
1456424_s_at	Pltp	0.387262	0.0438987
1421715_at	EG56544 /// EG245113 /// EG620718 /// LOC670328 /// LOC673714	0.372998	0.0439393
1444411_at	---	-0.653465	0.0439393
1439501_at	Cbara1	-0.416063	0.0439393
1417969_at	Fbxo31	-0.235054	0.0439591
1422467_at	Ppt1	-0.337315	0.0441138
1430689_at	2810019C22Rik	-0.538082	0.044216
1422156_a_at	Rps2 /// EG544872 /// EG546164 /// LOC546298 /// LOC620248 /// LOC620559 /// LOC623242 /// LOC628962 /// LOC637606 /// LOC664975 /// LOC665951 /// EG667279 /// EG667846 /// EG667847 /// LOC669206 /// LOC669347 /// LOC670479 /// LOC671929 /// LOC672594 ///	-0.216946	0.0442268
1454677_at	Timp2	0.227161	0.0443031
1435489_at	LOC552912	0.2784	0.0443398
1444444_at	---	-0.361816	0.0444377
1437907_a_at	Tbca	-0.267037	0.0445618
1415792_at	Rbck1	0.268445	0.0445859
1436812_at	Fkrp	0.667789	0.0446068
1438905_x_at	C030046I01Rik	0.358149	0.0446448
1455079_at	Dcun1d4	-0.488606	0.0450768
1437801_at	Morf4l1 /// LOC433955 /// EG627352 /// LOC635663	-1.08031	0.0451919
1441167_at	---	0.526041	0.0452467
1455800_x_at	Samm50	-0.282058	0.0452773
1455298_at	Id4	0.540026	0.0453932
1416212_at	Magoh	-0.241788	0.0455324
1442368_at	Kctd12b	-0.549679	0.0456983
1434169_at	9030409G11Rik	0.274475	0.045742
1433686_at	Cabin1	0.398987	0.0459537
1448346_at	Cfl1	0.463411	0.0459618
1449847_a_at	Col4a3bp	-0.588697	0.0459618
1417660_s_at	Vps29	-0.259823	0.0460019
1435933_at	Scn2a1	0.322237	0.0461511
1453604_a_at	Hbs1l	-0.696273	0.0462189
1427006_at	Rapgef1	0.425798	0.0463013
1418829_a_at	Eno2	0.323688	0.0463076
1455227_at	Aadacl1	0.257324	0.0463242
1436179_a_at	Dnajc5	0.340663	0.0463639
1423973_a_at	Arf3	0.367661	0.046678
1426297_at	Tcfe2a	0.406047	0.046781
1457736_at	Vps37d	0.320047	0.0468256
1425810_a_at	Csrp1	-0.677598	0.046835
1445379_at	Atp11c	-0.433117	0.0469068
1423726_at	Vat1	0.725457	0.04724
1433931_at	C030046I01Rik	0.67243	0.0473131
1457691_at	Ebi2	0.564338	0.0474822
1452181_at	Ckap4	0.519697	0.0477805
1452771_s_at	Acsl3	-0.360663	0.0480075
1425116_a_at	Spnb4	0.35267	0.04819
1428860_at	4930572J05Rik	0.755372	0.0482564
1452336_at	BC027382	0.668171	0.0485507
1452357_at	Gp1bb /// Sept5	0.293364	0.0486133
1448451_at	Ak2	-0.431657	0.0487378
1450027_at	Sdc3	0.260822	0.0487378
1423749_s_at	Rangap1	0.482359	0.0487669
1438535_at	Phip	-0.318115	0.0490431
1457531_a_at	F430201B04Rik	0.529948	0.0491194
1458656_at	AW050198	0.442627	0.0493526
1457124_at	EG668580	-0.368025	0.0495131
1424110_a_at	Nme1	-0.204208	0.04996

## Sheet: 18months
Affymetrix ID	GeneSymbol	FoldChange	Adj. P-value
1451148_at	Pink1	-4.2968	6.64751e-54
1441937_s_at	Pink1	-4.57475	1.53037e-48
1458719_at	---	0.677851	1.12711e-34
1454714_x_at	Phgdh /// LOC668771 /// LOC670155 /// LOC671972 /// LOC673015	-3.55547	4.43491e-33
1424108_at	Glo1	0.294156	1.36597e-25
1456471_x_at	Phgdh /// LOC382931 /// LOC384524 /// LOC385344 /// LOC547171 /// LOC627427 /// LOC666422 /// LOC666875 /// LOC668771 /// LOC669671 /// LOC669985 /// LOC670155 /// LOC670187 /// LOC671102 /// LOC671972 /// LOC673015 /// LOC675010	-1.81958	2.02785e-17
1459828_at	Srrm1	1.44582	2.30903e-17
1428375_at	4932415G12Rik	-1.8297	6.22834e-17
1451240_a_at	Glo1	0.656514	1.55786e-16
1429232_at	2610528B01Rik	0.941382	2.45582e-16
1420935_a_at	Srrm1	0.999641	3.04387e-16
1431708_a_at	Tia1	1.41755	3.4069e-16
1446565_at	Man1a2	-1.11763	1.64942e-13
1428376_at	4932415G12Rik	-1.63759	2.10961e-12
1418526_at	Fusip1	-0.896386	3.55738e-12
1449121_at	Fusip1	-0.591569	6.4346e-12
1438766_at	Pnrc2	-0.993329	7.51254e-12
1416187_s_at	Pnrc2	0.755584	7.51254e-12
1440296_at	EG666250 /// LOC669419	-1.33584	3.66765e-11
1444772_at	Smyd3	1.89525	4.65874e-11
1424109_a_at	Glo1	-0.248303	7.41643e-11
1416041_at	Sgk	0.381356	2.81586e-10
1430375_a_at	Ccl27	-0.741429	6.4254e-10
1441493_at	Erc1	-2.90829	9.33942e-10
1443109_at	5830417C01Rik	1.37039	2.63159e-09
1419188_s_at	Ccl27	-0.776522	7.89478e-09
1436320_at	---	-0.975313	1.85543e-08
1428850_x_at	Cd99	-1.19703	2.06612e-08
1434962_x_at	Ccl27	-0.95474	4.58084e-08
1453556_x_at	Cd99	-0.66066	8.04037e-08
1418032_at	Itfg2	-0.454762	9.45273e-08
1441228_at	Apold1	0.454225	1.01298e-07
1460674_at	Paqr7	-0.607972	1.48844e-07
1443196_at	---	-1.07755	2.19719e-07
1434540_a_at	Clta	-1.94258	3.02669e-07
1437042_at	Arnt	0.802989	3.4557e-07
1459429_at	Ktn1	1.18569	3.4557e-07
1418228_at	Nfu1	-0.554767	4.65254e-07
1441495_at	Kctd8	-1.43792	5.18733e-07
1421487_a_at	Nck1	-0.800344	5.21709e-07
1427212_at	Mapkap1	-0.783651	7.00026e-07
1436022_at	Endogl1	-0.710377	8.34315e-07
1449030_at	Syn2	-0.807275	8.73691e-07
1438290_x_at	Sftpc	0.856238	8.73691e-07
1440157_at	Scml4	0.615683	1.60502e-06
1452218_at	Ccdc117	-0.304107	1.77563e-06
1443752_at	E230008N13Rik	0.952824	1.79895e-06
1448140_at	Ciapin1	-0.732194	1.83992e-06
1449186_at	Bag4	-1.03797	1.85849e-06
1430514_a_at	Cd99	-0.331527	2.16256e-06
1425563_s_at	Pcdh10	-1.23813	2.16256e-06
1417514_at	Ssx2ip	-1.19289	2.16256e-06
1441058_at	Itpkb	0.987618	2.16256e-06
1447839_x_at	Adm	0.868488	2.38978e-06
1435137_s_at	1200015M12Rik /// 1200016E24Rik /// A130040M12Rik /// E430024C06Rik	0.260863	2.4142e-06
1431031_at	Arid4b	-1.27453	2.50308e-06
1420088_at	Nfkbia	0.450822	2.51975e-06
1419905_s_at	Hpgd	-0.750264	2.82417e-06
1422327_s_at	G6pd2 /// G6pdx	-1.06975	2.86155e-06
1432419_a_at	2700078K21Rik	-0.726172	2.98872e-06
1416147_at	Hspa4	-0.438949	3.00939e-06
1428101_at	Rnf38	-0.593624	3.33443e-06
1434528_at	Aard	-0.30743	3.34413e-06
1438157_s_at	Nfkbia	0.444827	3.99754e-06
1421141_a_at	Foxp1	-0.68487	4.40264e-06
1459766_x_at	---	1.39009	5.07224e-06
1426456_a_at	Pias2	-0.8288	5.16558e-06
1439630_x_at	Sbsn	-0.39244	5.22214e-06
1450679_at	5730470L24Rik	-0.755613	6.51581e-06
1453369_a_at	Fundc1	-1.31821	6.77161e-06
1440773_at	2410004P22Rik	0.649832	7.5674e-06
1423233_at	Cebpd	0.503225	7.5674e-06
1425190_a_at	Phospho2	-0.986089	7.5674e-06
1431644_a_at	Ica1	-0.860299	7.73436e-06
1444612_at	3222402P14Rik	-1.42666	8.37965e-06
1434752_at	Zfp207	0.410797	8.37965e-06
1453224_at	Zfand5	-1.76064	8.37965e-06
1450945_at	Prkca	-0.79079	8.68316e-06
1418527_a_at	Fusip1	-1.3146	8.68316e-06
1444952_a_at	Nucks1	1.07112	9.93568e-06
1421828_at	Kpna3	-1.1486	1.05954e-05
1439089_at	Zbtb41	-0.941721	1.06074e-05
1445562_at	Zbtb16	0.938123	1.07831e-05
1425228_a_at	Dguok	-0.535168	1.09763e-05
1431406_at	Agxt2l1	0.459312	1.15139e-05
1448127_at	Rrm1	-1.52215	1.25917e-05
1453113_at	Wdsub1	-0.580126	1.30707e-05
1456904_at	---	-0.532398	1.30707e-05
1424880_at	Trib1	-0.788747	1.40326e-05
1433388_at	2900022M07Rik	0.877908	1.44496e-05
1431382_a_at	Rsnl2	-1.30238	1.44533e-05
1440910_at	C77370	-0.832627	1.44533e-05
1419979_s_at	Creb3	-0.450099	1.55253e-05
1426680_at	Sepn1	-0.261226	1.58316e-05
1417956_at	Cidea	-0.722807	1.64663e-05
1455102_at	D330037H05Rik /// LOC673040 /// LOC677019	-0.814493	1.64663e-05
1417361_at	Asb3	-0.517141	1.67469e-05
1451317_at	Ythdf2	-0.468859	1.71594e-05
1419749_at	Trdmt1	-0.77941	1.71594e-05
1451612_at	Mt1	0.533042	1.71767e-05
1439197_at	Pik4cb	0.630355	1.71767e-05
1433793_s_at	Nrip2	-1.34479	1.79874e-05
1433974_at	Sephs1	-1.2615	1.84391e-05
1452168_x_at	Gspt1	-0.515917	1.84391e-05
1447060_at	Smyd3	1.042	1.8806e-05
1423372_at	Pole4	-0.358648	1.90606e-05
1432489_a_at	2410187C16Rik	-0.954308	1.90606e-05
1436559_a_at	Psmd10	-0.804191	1.90606e-05
1439296_at	---	1.23621	1.99565e-05
1450631_x_at	Defcr12 /// Defcr15 /// Defcr25 /// Defcr3 /// Defcr6 /// Defcr17 /// Defcr23 /// Defcr24 /// Defa-ps1	2.16639	1.99565e-05
1420959_at	Asph	-0.721778	2.16667e-05
1449092_at	Ppm1d	-0.738287	2.42857e-05
1436725_at	E130306D19Rik	0.589595	2.61953e-05
1418109_at	Gspt2	-0.525388	2.61953e-05
1425711_a_at	Akt1	-0.816682	2.65287e-05
1432249_a_at	Ercc8	-1.20821	2.65287e-05
1455182_at	Kif1b	-0.262105	2.65287e-05
1432462_a_at	Crsp8	-1.0183	2.66854e-05
1448624_at	Cd2bp2	-0.888402	2.69441e-05
1426313_at	Bre	-1.09843	2.79864e-05
1422719_s_at	Nup50	-0.700212	2.91592e-05
1425337_at	Slc12a5	-1.38061	2.96459e-05
1418716_at	Mrps25	-0.435378	2.96459e-05
1417371_at	Peli1	-0.208146	2.96459e-05
1416774_at	Wee1	-1.56901	3.00221e-05
1449083_at	Ccdc91	-0.333265	3.00221e-05
1433792_at	Nrip2	-1.2906	3.06696e-05
1424845_a_at	Cep68	0.487572	3.15422e-05
1435139_at	Narg1	-0.777505	3.20131e-05
1425344_at	Narf	-0.984155	3.24732e-05
1442712_at	EG667350	0.913304	3.25638e-05
1438855_x_at	Tnfaip2	0.959621	3.35359e-05
1434360_s_at	Ptprg /// LOC632664	-0.807157	3.65446e-05
1432488_a_at	Sf3a3 /// LOC626830	-0.888528	3.66808e-05
1417442_a_at	Pex3	-0.922203	3.78888e-05
1432207_a_at	Toe1	-0.91942	3.78888e-05
1460260_s_at	Kpna1	-0.577299	3.84254e-05
1445330_at	Pdia3	-0.684564	3.84254e-05
1436800_at	Fstl5	-1.21196	3.91999e-05
1421435_at	Grid2	-0.876016	3.96428e-05
1427916_at	St7l	-0.622933	3.96565e-05
1429534_a_at	Immt	-0.706633	4.0094e-05
1449645_s_at	Cct3	-1.10827	4.0094e-05
1423094_at	Crbn	-0.959152	4.10522e-05
1435647_at	Ikbkg	-1.04627	4.12812e-05
1420977_at	Man1a2	-0.652731	4.30507e-05
1452236_at	Abcf1	0.28973	4.41136e-05
1429518_at	Faim2	-0.467526	4.41136e-05
1428834_at	Dusp4	-0.700701	4.52597e-05
1435071_at	Zfyve1	-1.01522	4.52597e-05
1460362_at	2410001C21Rik	-0.834653	4.52597e-05
1453907_at	C030041B07Rik	0.527176	4.52597e-05
1426621_a_at	Ppp2r2b	-0.846332	4.52597e-05
1456875_at	1810013L24Rik	-0.663261	4.79458e-05
1443896_at	Tbc1d5	-0.618152	4.96974e-05
1433526_at	Klhl8	-0.910891	5.06712e-05
1431105_a_at	Tmem33	-1.20044	5.1493e-05
1440180_x_at	Zbtb3	0.998694	5.29738e-05
1424690_at	5930434B04Rik	-0.810807	5.29738e-05
1450039_at	Usp9x	-1.27988	5.35049e-05
1447313_at	---	0.422784	5.35049e-05
1416754_at	Prkar1b	-1.32621	5.35049e-05
1417566_at	Abhd5	-0.921279	5.35399e-05
1426627_at	Map3k7	-0.802763	5.35399e-05
1440845_at	E030031F02Rik	-0.705997	5.35399e-05
1426657_s_at	Phgdh /// LOC666422 /// LOC666875 /// LOC669985 /// LOC671102 /// LOC673015 /// LOC675010	-0.44362	5.46294e-05
1428402_at	Zcchc3	-0.750701	5.46294e-05
1428189_at	5730494M16Rik	-0.63119	5.46601e-05
1453960_a_at	Capzb	-1.24658	5.46601e-05
1431403_a_at	2900002G04Rik	0.433395	5.46744e-05
1416132_at	C920006C10Rik	-1.6675	5.74042e-05
1424406_at	Bcl2l13	-0.476127	5.75803e-05
1424935_at	Gdap1l1	-0.33985	5.79375e-05
1423528_at	Bcas3	-1.53283	5.93079e-05
1425963_at	Cabp7	-1.58748	5.93079e-05
1423948_at	Bag2	-0.490011	5.93079e-05
1433387_at	2900022M07Rik	0.749432	5.93079e-05
1435527_at	Nfic	0.198114	6.00113e-05
1439640_at	---	0.459207	6.01744e-05
1422891_at	H2-Ea	0.552179	6.01744e-05
1423082_at	Derl1	-1.17271	6.09905e-05
1430158_at	3110021A11Rik	-0.555296	6.10537e-05
1454168_a_at	Clpb	-0.895813	6.21766e-05
1431873_a_at	Tube1	-0.216562	6.21766e-05
1431334_a_at	4933433P14Rik	-1.17156	6.31324e-05
1428499_at	2810454L23Rik	-0.450927	6.43441e-05
1427518_at	D10627	-0.938477	6.70778e-05
1422753_a_at	Polr3k	-0.707595	6.70948e-05
1426929_at	Brunol4	-0.319274	6.83475e-05
1436972_at	Gpr61	0.224914	6.86284e-05
1448364_at	Ccng2	-1.18044	6.93706e-05
1450052_at	Kif2a	-0.640999	6.98258e-05
1417567_at	Ctnnbip1	-0.419281	6.98258e-05
1459878_a_at	A430107O13Rik	1.52823	7.01093e-05
1440670_at	---	0.527167	7.31869e-05
1425099_a_at	Arntl	-0.488935	7.43869e-05
1429501_s_at	Ppm1a	-1.07134	7.48769e-05
1425533_a_at	Stau2	-0.399831	7.48769e-05
1453021_at	Stxbp5	-0.610454	8.01122e-05
1434467_at	Atcay	-1.03794	8.19484e-05
1425732_a_at	Mxi1	-1.16432	8.19484e-05
1448170_at	Siah2	-0.302876	8.22378e-05
1438112_at	9430021M05Rik	-0.692305	8.25795e-05
1443290_at	---	-0.463855	8.37263e-05
1417307_at	Dmd	-0.589292	8.43046e-05
1448501_at	Tspan6	-0.82022	8.43046e-05
1421544_at	Dnahc11	0.708495	8.43046e-05
1436305_at	Ibrdc1	-0.776448	8.43046e-05
1430515_s_at	Aasdhppt	-0.817761	8.69657e-05
1449209_a_at	Rdh11	-0.799337	8.72248e-05
1452456_at	Nrip2	-1.48962	8.92678e-05
1459770_at	Taok1	0.975797	9.02837e-05
1421448_at	Garnl1	-1.23234	9.23699e-05
1416756_at	Dnajb1	-0.916723	9.23699e-05
1435646_at	Ikbkg	-1.17989	9.23699e-05
1457354_at	Krt222	-0.805895	9.43866e-05
1427528_a_at	Epha7	-0.924584	9.43866e-05
1450778_a_at	Rnuxa	-0.512563	9.43866e-05
1460553_at	1700025K23Rik	-0.573661	9.48401e-05
1460258_at	Lect1	1.44704	9.52826e-05
1458163_at	BC066028	-0.281433	9.599e-05
1426084_a_at	Tor1aip1	-0.490681	9.69418e-05
1450520_at	Cacng3	-0.992148	9.7035e-05
1423962_at	Wdr26	-0.689585	9.7035e-05
1457284_at	---	-0.474992	9.80063e-05
1418715_at	Pank1	-0.262463	9.82249e-05
1436893_a_at	7-Mar	-0.350465	9.83184e-05
1434027_at	Dscr1l2	-0.526182	9.85924e-05
1436327_a_at	Vps53	-1.00771	9.85924e-05
1430133_at	Tbc1d8b	-0.584986	0.000100493
1431061_s_at	Peli1	-1.20912	0.000102576
1429655_at	Nudcd1	-0.905071	0.000105574
1424876_s_at	Spg20	-0.809505	0.000106337
1417325_at	Btrc	-0.647169	0.000106337
1430556_at	Spag9	0.314207	0.000106337
1428345_at	Ppapdc2	-1.03067	0.000106337
1439188_at	Cpsf6	-0.45659	0.000106697
1438679_at	Trim8	-1.19365	0.000107289
1420339_at	0610016J10Rik	-0.670385	0.000108874
1459897_a_at	Sbsn	-0.306505	0.000109759
1443665_at	AI852444	-1.86714	0.000109759
1449391_at	Zfp37	-1.06343	0.000110115
1459253_at	Arrdc3	-0.433143	0.000111643
1448897_at	Mkrn2	-0.695384	0.000114843
1455279_at	Gm1060	0.261752	0.000116615
1451457_at	Sc5d	-0.291385	0.00011689
1460460_a_at	Gorasp2	-1.34762	0.00011689
1434040_at	Appbp2	-0.683533	0.000117018
1429786_a_at	Zwint	-1.21819	0.000117018
1460519_a_at	Mettl5	-0.751376	0.000117018
1421209_s_at	Ikbkg	-0.479301	0.000123814
1441910_x_at	Ccne1	0.420078	0.000124274
1419451_at	Fzr1	-0.693912	0.000125772
1423161_s_at	Spred1	-0.750827	0.00012624
1429375_at	Anapc10	-0.560365	0.000127065
1450321_at	Zfp354c	-1.24676	0.000127065
1450747_at	Keap1	-0.86093	0.00012991
1431422_a_at	Dusp14	-0.876034	0.000132754
1416459_at	Arf2	-1.07837	0.00013527
1422216_at	Mid2	-0.901719	0.000135898
1460414_at	AW822216	0.425192	0.000135898
1452080_a_at	Dcun1d1	-1.44219	0.000135898
1441235_at	Nup133	-0.608374	0.000136122
1420545_a_at	Chn1	-0.861217	0.000136122
1460025_at	Lrig2	-0.444977	0.000136122
1447759_x_at	Ccdc22	0.420617	0.000137155
1422733_at	Fjx1	-0.711587	0.000137242
1425170_a_at	Adam15	-1.00195	0.000137787
1418464_at	Matn4	-0.230973	0.000138768
1423005_a_at	Espn	0.650543	0.000140744
1454142_a_at	Pwp1	-0.911578	0.000140998
1431554_a_at	Anxa9	-0.354575	0.000141141
1424822_at	Slain1	-0.690593	0.000142002
1433810_x_at	Ddx5	-0.96274	0.00014213
1431295_a_at	Stx18	-0.576484	0.00014213
1451908_a_at	Sec14l1	-0.937968	0.00014213
1423183_at	Lgi1	-0.815717	0.000144371
1424403_a_at	Rufy3	-0.575494	0.000145681
1444303_at	Mark2	0.685545	0.000146044
1451353_at	Tm6sf1	-0.541325	0.000147659
1428199_at	Adal	-0.964365	0.000150817
1426449_a_at	Pja1	-0.746184	0.000151054
1428993_at	1110017I16Rik	0.581585	0.000151054
1422767_at	Bysl	-0.403753	0.000151054
1418913_at	Bhmt2	0.886439	0.000151054
1421797_a_at	Snx12	-1.38005	0.000152663
1434978_at	4933403F05Rik	-0.51164	0.000152663
1428648_at	Cand1	-0.464051	0.000153007
1416289_at	Plod1	-0.266764	0.000153932
1448216_at	Syngr3	-0.781248	0.000153932
1416173_at	Pes1	-0.580585	0.000153932
1432436_a_at	Ak3	-1.2429	0.000155393
1450849_at	Hnrpu	-0.74724	0.000157719
1423051_at	Hnrpu	-0.568354	0.000159726
1452274_at	Zfand3	-0.758088	0.000159726
1455923_at	Kctd8	-0.817938	0.000159726
1441128_at	Wdr20a	-0.593515	0.000162964
1426427_at	Ttll1	-0.666151	0.000162964
1424201_a_at	Seh1l	-0.884358	0.00016466
1426191_a_at	Bcl2l1	-1.21784	0.00016482
1454814_s_at	AU021838	-0.429304	0.00016482
1418280_at	Klf6	-1.25638	0.000165298
1449731_s_at	Nfkbia	0.423164	0.000167443
1439144_at	Cwf19l1	0.860856	0.000167793
1421604_a_at	Klf3	-0.868143	0.000167958
1451579_at	BC024139	0.492547	0.000169034
1421395_at	Zik1	-1.0784	0.000169373
1425382_a_at	Aqp4	-0.611616	0.000169373
1432229_a_at	Cdyl2	-0.701153	0.000169781
1458354_x_at	Krt28	1.27532	0.000171866
1429617_at	Cyld	-1.03564	0.000171897
1449969_at	Tmod4	0.638339	0.000171933
1457183_at	Slc6a1	1.04887	0.000172521
1435518_at	Rap1b	-0.805474	0.00017498
1419289_a_at	Syngr1	-1.43944	0.000177045
1431734_a_at	Dnajb4	-0.788141	0.000177277
1424259_at	Tmem112	-0.672444	0.000179458
1452025_a_at	Zfp2	-1.12032	0.000179482
1453470_a_at	Gna13	-1.34694	0.000181597
1455625_at	---	-0.472532	0.000181958
1416931_at	Nif3l1	-0.536191	0.000185561
1440679_at	---	0.475816	0.000185817
1450388_s_at	Twsg1	-0.365314	0.000186841
1434370_s_at	Faf1	-1.09072	0.000186841
1427227_at	Gabrg1	-1.13742	0.00018842
1418974_at	Blzf1	-0.794842	0.000189916
1430134_a_at	Yars2	-0.948971	0.000190296
1452747_at	Atp13a2 /// LOC676620	-0.624899	0.000191954
1436382_at	Zbtb12	-0.335413	0.000192176
1419761_a_at	Gabpb1	-0.940331	0.000195876
1450988_at	Lgr5	-0.367807	0.000196687
1446612_at	9330118A15Rik	-1.27655	0.00019895
1418754_at	Adcy8	-0.456574	0.00020252
1418498_at	Fgf13	-1.41556	0.000203969
1450129_a_at	Socs6	-0.678778	0.000206566
1439256_x_at	Gpr137b /// LOC664862	-0.310228	0.000206566
1429385_at	Wdr68	-1.41397	0.00020856
1425329_a_at	Cyb5r3	-0.620088	0.000210391
1457768_at	Prune	0.619475	0.000210391
1450907_at	Spcs2	-0.658188	0.000210391
1456544_at	---	-0.48378	0.000212488
1430394_a_at	Abcb9	-0.780775	0.000212488
1449406_at	Cyhr1	-0.569003	0.00021369
1435134_at	Aadacl1	-1.36689	0.00021369
1434763_at	Tmem142b	-0.977211	0.000214189
1449978_at	Zfy2	1.21036	0.000214189
1420356_at	Ninj2	-0.5211	0.000215364
1432349_a_at	Sync	0.865798	0.000220562
1424321_at	Rfc4	-0.698367	0.000220562
1448824_at	Ube2j1	-0.88915	0.000222289
1420656_at	Abcg8	0.27757	0.00022454
1438140_a_at	Zfp64	-0.991583	0.000225462
1449460_at	Asb13	-0.913123	0.000225584
1431646_a_at	Stx6	-0.791151	0.000229414
1423322_at	Lin7c	-0.840769	0.000231847
1450097_s_at	Gna12	-1.08969	0.000232354
1449037_at	Crem	-0.501325	0.000233256
1440130_at	BB116930	-0.580421	0.000234986
1449086_at	Rnf141	-1.11302	0.000239297
1435169_at	A930001N09Rik	-0.744278	0.000242629
1428903_at	3110037I16Rik	-0.372147	0.00024273
1448478_at	Trfp	-0.326524	0.000243949
1426519_at	P4ha1	-0.985666	0.000246875
1438635_x_at	B930041F14Rik	-0.258476	0.000247303
1456047_at	Pla2g4b	0.651101	0.000249602
1439662_at	Homer1	-0.735963	0.000249602
1432432_a_at	Rab3c	-1.00716	0.000249602
1460693_a_at	Col9a3	1.41337	0.000249602
1453367_a_at	Abhd12	-0.984415	0.000249602
1434357_a_at	Kpnb1	-1.89925	0.000249602
1416785_at	Kcnip1	-0.836907	0.000250282
1457980_x_at	Uck2	0.355299	0.000254669
1436869_at	Shh	-0.542515	0.000256559
1431645_a_at	Gdi2	-1.62496	0.000256902
1423475_at	Cnnm2	-0.705582	0.000258247
1424982_a_at	2700078E11Rik	-0.654574	0.000260417
1426312_at	Bre	-0.608956	0.000265555
1436858_at	Mbnl2	-1.04828	0.000265555
1419223_a_at	Dtna	-1.49536	0.000265974
1452935_at	EG546143	-0.594791	0.000267741
1422499_at	Lima1	0.931428	0.000268033
1444993_at	LOC664949 /// LOC671072 /// LOC675080	-0.422085	0.000268695
1430117_a_at	Zfp64	-0.713753	0.000268695
1445686_at	---	0.540352	0.000268695
1432252_a_at	4933406K04Rik	0.97235	0.000268695
1435980_x_at	Wnt6	0.947985	0.000268695
1427230_at	B930041F14Rik	-0.427638	0.00027305
1423880_at	D10Wsu52e	-0.226163	0.000279796
1448749_at	Plek	-0.977709	0.000280409
1442066_at	C530028O21Rik	-0.67593	0.000290484
1418565_at	Serbp1	-0.795884	0.000291957
1452963_at	9530077C05Rik	-0.232904	0.000292523
1436167_at	Shf	-0.238986	0.000295134
1441916_s_at	Odf3	0.963658	0.000295134
1460290_at	Lpin2	-0.614865	0.000297449
1428971_at	5730405I09Rik	-0.720241	0.000305955
1430571_s_at	Armc6	-0.689062	0.000306179
1456135_s_at	Pxn	0.429336	0.000306547
1426398_at	Ube2w	-0.640221	0.000306547
1429834_a_at	1110014N23Rik	-0.910911	0.000306547
1433938_at	Trp53bp2	-0.476857	0.000306547
1451794_at	Tmcc3	-0.64114	0.000309009
1451839_a_at	Pde7a	-0.741847	0.000310604
1426368_at	Rin2	-0.604825	0.000318063
1455853_x_at	Tspan31	1.19049	0.000318063
1424164_at	Mrpl50	-1.12134	0.000318063
1421958_at	L1cam	-0.880719	0.000319161
1429392_at	Wdr40a	-0.866362	0.000320248
1419522_at	Zmynd19	-0.543663	0.000323533
1424538_at	Ubl4	-0.821996	0.000324106
1416706_at	Rpe	-0.9112	0.000328989
1452376_at	Zfp444	-0.542332	0.000332711
1428544_at	0610007L01Rik	-0.710366	0.000333471
1423603_at	Zfpm1	-0.409124	0.000334363
1440318_at	Wdr35	-1.10755	0.000335009
1451793_at	Klhl24	-0.931891	0.000336106
1437734_at	Ppp1r12a	-0.616907	0.000336106
1455896_a_at	Kcnk1	-0.924051	0.0003389
1417259_a_at	Capzb	-0.70136	0.000341037
1433621_at	Wdr41	-0.68021	0.000341037
1448207_at	Lasp1	-0.853896	0.000341555
1436541_at	2310008H09Rik	-0.924408	0.000348464
1420938_at	Hs6st2	-0.836056	0.00034883
1416239_at	Ass1	-0.64049	0.000349255
1441783_at	2410022M11Rik	-0.645463	0.000349255
1418318_at	Rnf128	-0.249744	0.000356094
1431096_at	Ints8	-1.40207	0.000357271
1428119_a_at	Rap2c	-0.68323	0.000360696
1433582_at	1190002N15Rik	-0.625866	0.000360992
1426314_at	Ednrb	-1.23787	0.000361566
1429169_at	Rbm3	-0.452988	0.000362178
1456735_x_at	Acpl2	0.352667	0.000364909
1456482_at	Pik3r3	-0.453721	0.000367469
1440357_at	---	-0.372992	0.000371225
1454875_a_at	Rbbp4	-1.50546	0.000371225
1419361_at	Ss18	-0.852875	0.000371225
1431285_at	Mgrn1	-0.86521	0.000371225
1417012_at	Sdc2	-1.18032	0.000371225
1434902_at	Rnf157	-0.923071	0.000371225
1425481_at	Cnot6l	-0.723187	0.000372226
1421233_at	Pknox1	-0.97218	0.000372226
1425249_a_at	Tyro3	-0.574481	0.000374311
1435001_at	Plaa	-0.400914	0.000374439
1446065_at	Kcnd2	0.432873	0.000374439
1430034_at	Cct4	-0.421676	0.000375518
1429601_x_at	C630010D07Rik /// LOC665563 /// LOC674367	-0.366718	0.000376275
1435566_s_at	Araf	-0.845364	0.000376533
1428430_at	Rgmb	-1.09924	0.000379549
1424297_at	Zfp282	-0.38662	0.000379704
1436568_at	Jam2	-0.404211	0.000381828
1437476_at	Rrm2b	-1.18658	0.000381828
1453263_at	Mak10	-1.01045	0.00038619
1424276_at	Snx16	-0.310494	0.00038619
1441847_at	Mast2	0.403451	0.000390103
1447032_at	Clybl	0.981962	0.000390103
1438615_x_at	2010317E24Rik	0.867462	0.000392206
1421730_at	Nr5a1	0.660495	0.000392851
1441607_at	AU015603	-1.03315	0.000392851
1456739_x_at	Armcx2	0.275973	0.000392851
1431000_at	2310002B06Rik	-0.89918	0.000392991
1428985_at	Ints12	-0.585274	0.000396113
1431506_s_at	Ppih /// LOC433064 /// LOC629952 /// EG665989 /// LOC666411 /// LOC669441 /// LOC671009 /// LOC676493	-0.60095	0.000396768
1428863_at	Ankrd39	-0.508898	0.000400801
1423511_at	Asf1a	-0.616855	0.000402546
1430187_at	Zfp60	-0.665391	0.000405186
1455130_at	Spty2d1	-0.315912	0.000405248
1416518_at	H1foo	0.711452	0.000407491
1426582_at	Atf2	-0.709901	0.000407491
1448119_at	Bpgm	-0.941407	0.000418063
1448538_a_at	D4Wsu53e	-0.968065	0.000426674
1451413_at	Cast	-0.344379	0.000426774
1453149_at	Slc25a32	-0.675164	0.000427687
1447603_x_at	1700027J05Rik	0.473639	0.000428018
1453983_a_at	Mett10d	-0.211535	0.000428526
1423237_at	Galnt1	-0.305368	0.000432522
1422117_s_at	Khdrbs2	-0.627527	0.000432522
1426331_a_at	Frmd4b	-0.595567	0.000432522
1444402_at	Zc3h12c	-0.662335	0.000432522
1425479_at	Smyd5	-0.883316	0.000432522
1445869_at	---	0.459685	0.000432522
1416362_a_at	Fkbp4	-0.541505	0.000432522
1420640_at	Jmy	-0.439649	0.000432522
1444560_at	---	-0.386693	0.000432566
1423652_at	Hbld2	-1.21138	0.000436094
1435632_at	Nufip2	-0.462681	0.000436094
1421433_at	Zfhx4	-0.835762	0.000440987
1436126_at	Dnali1	0.97385	0.000442495
1434209_at	Prmt6	-0.480321	0.000442495
1434202_a_at	BC055107	0.224225	0.000442495
1434672_at	Gpr22	-0.910645	0.000444639
1423778_at	Usp20	-0.6809	0.000446485
1450382_at	Nf2	-0.560408	0.000452529
1455290_at	Znrf2	-0.765394	0.000452529
1455930_at	LOC673503	0.896724	0.000454111
1420839_at	Plekha3	-1.18293	0.000454748
1456486_at	Zfp574	-0.795441	0.000456674
1421900_at	Eif2ak1	-0.784536	0.000456674
1453473_a_at	Dynlt1 /// LOC671261	-0.642993	0.000456674
1417053_at	Phb /// LOC665511	-0.544724	0.000456674
1430289_a_at	Wdr77	-1.0441	0.000456674
1452263_at	Slc35f4	-0.370189	0.000456674
1420889_at	Hccs	-1.11117	0.000457647
1459921_at	Nxph1	-0.731562	0.000458716
1418520_at	Tgoln1	-1.00536	0.000460357
1438205_at	1110014N23Rik	-1.01136	0.00046561
1426411_a_at	Strbp /// C230082I21Rik	-0.560957	0.000470237
1449116_a_at	Dtymk	-0.683606	0.000470486
1449857_at	1200011I18Rik	-1.4052	0.000470794
1420282_s_at	Prss29	0.715461	0.000471457
1445713_at	9630041G16Rik	-0.695121	0.00047419
1421890_at	St3gal2	-1.48076	0.00047419
1455652_at	AW124694	-0.292845	0.000474388
1450007_at	1500003O03Rik	-1.49127	0.000481658
1419678_at	Lats2	-0.885916	0.00048251
1428649_at	Cand1	-1.46597	0.00048673
1460676_at	Josd1	-0.451739	0.000488101
1451223_a_at	Btf3l4	-0.88903	0.000488389
1428777_at	Spred1	-0.858997	0.000489188
1418079_at	Psme3	-0.726205	0.000490931
1425487_at	Slu7	-0.908315	0.000492207
1421015_s_at	Pole3	-0.808313	0.000494919
1424904_at	1300010F03Rik	-0.504892	0.0004951
1451177_at	Dnajb4	-0.211763	0.000496297
1428358_at	1810010M01Rik	0.943265	0.000496297
1441416_at	Inpp4b	-0.589563	0.000498433
1451345_at	Mtap	-0.778951	0.000504276
1427271_at	Zbtb44	-0.354106	0.000507039
1448414_at	Rad1	-0.544891	0.000508298
1429078_a_at	Cops7a	-0.539914	0.000511342
1419041_at	Itfg1	-0.89874	0.000515079
1422616_s_at	Wdr54	-0.249193	0.000515079
1432360_a_at	Tmtc4	-0.656662	0.000515959
1450089_a_at	Srprb	-1.09209	0.000520124
1456470_x_at	Tubb2c	0.457646	0.000520124
1427448_at	Rabep1	-0.465664	0.000520484
1450986_at	Nol5	-0.499443	0.000520484
1438220_at	Foxj3	-1.0755	0.000520484
1428645_at	Gnai3	-0.294573	0.000524842
1421539_at	Zic4	-1.41203	0.000529035
1458626_at	Nos1	0.703815	0.00052979
1450483_at	Gja12	-1.02857	0.0005308
1434440_at	Gnai1	-0.487835	0.0005308
1426635_at	Acbd3	-1.0145	0.000535981
1451956_a_at	Oprs1	-0.918614	0.000536836
1426620_at	Chst10	-0.661147	0.000540641
1456523_at	C77713	-0.768604	0.000544797
1422609_at	Arpp19	-0.540526	0.000546974
1424178_at	Tmem38a	-1.01888	0.000550425
1447657_s_at	Synpo2l	0.742529	0.000550612
1421866_at	Nr3c1	-1.7046	0.000556667
1454687_at	Lrfn5	-0.605658	0.000559793
1448332_at	Pex19	-0.897537	0.000563027
1419157_at	Sox4 /// LOC672274	-0.825247	0.000563027
1440864_at	AI836737	-0.600813	0.000568841
1450731_s_at	Tnfrsf21	-0.788891	0.000570108
1450440_at	Gfra1	-0.698747	0.000570108
1416675_s_at	Plcd1	0.359234	0.000570953
1430634_a_at	Pfkp	-1.69048	0.000571122
1424826_s_at	Mtss1	-0.556656	0.000571122
1417984_at	Ube2v2	-0.912638	0.000571122
1450154_at	Folh1	-0.359136	0.000573164
1445503_at	Gm715 /// LOC671594	-0.67187	0.000580592
1459054_at	BC035954	0.819192	0.000582251
1447117_at	Ctnna2	-0.538127	0.000582816
1434979_at	4933403F05Rik	-0.836349	0.000585979
1456415_at	Zfp451	-0.389289	0.000587911
1456422_at	---	-1.52033	0.000590995
1424589_s_at	Rnpc3	-0.480481	0.000590995
1424620_at	D13Wsu177e	-0.615911	0.000592317
1439470_at	2410025L10Rik	0.258919	0.000592979
1437743_at	Aebp2	-0.587127	0.000594721
1430127_a_at	Ccnd2	-1.04894	0.000595379
1435234_at	Ncoa2	-1.22849	0.000596348
1425106_a_at	Wars	-0.811626	0.000599007
1416794_at	Arl6ip2	-1.75437	0.000599007
1448781_at	Nab1	-0.489554	0.000599574
1417491_at	Ctsb	-0.244719	0.000602755
1452037_at	Mgat2	-0.575107	0.0006105
1454106_a_at	Cxxc1	-0.996169	0.000612963
1456114_at	Cds1	-0.588935	0.000613044
1457832_at	Zc3h15	-0.746901	0.000613044
1428587_at	Tmem41b	-0.957627	0.000621389
1432646_a_at	EG640370 /// EG667653 /// LOC672953	-1.52737	0.000621389
1449551_at	Myo1c	-0.626879	0.000621389
1449264_at	Syt11	-1.05826	0.000621389
1460510_a_at	Coq10b	-0.490028	0.00062455
1426849_at	Sec24b	-1.47454	0.000625524
1439264_x_at	Lasp1	0.44103	0.000625872
1437879_at	Alg10b	-1.40155	0.000629354
1429254_at	Aqp11	-0.721213	0.000629377
1452294_at	Pcdh1	-0.305329	0.000629377
1421809_at	Dgcr2	-0.777556	0.000629377
1418384_at	9430083G14Rik	-0.740192	0.000629377
1429241_at	Npal3	-1.27845	0.000631936
1439124_at	9530020G05Rik	0.520878	0.000633607
1450381_a_at	Bcl6	-0.767399	0.000636742
1416019_at	Dr1	-1.48206	0.000641437
1436071_at	---	-0.276053	0.000652594
1417153_at	Btbd14a	-0.91629	0.000653981
1433462_a_at	Pi4k2a	-0.870404	0.000655892
1440868_at	Gabpb2	0.916293	0.000656643
1429759_at	Rps6ka6	-0.599331	0.000657052
1420871_at	Gucy1b3	-0.914778	0.000657261
1437595_at	E030010A14Rik	0.814104	0.00066018
1457668_x_at	Ebna1bp2	1.21367	0.00066375
1432305_at	4930542C16Rik	0.626495	0.000667396
1460466_at	1700047I17Rik /// LOC665155	-0.670591	0.000667432
1447824_x_at	Hspa5	0.281278	0.000669297
1421369_a_at	Mab21l1	-1.15388	0.000669297
1448845_at	Rpp25	-0.307232	0.000676212
1452128_a_at	Brcc3	-0.368321	0.000678596
1444478_at	2900057D21Rik	-0.429913	0.000678596
1450478_a_at	Ptpn12	-0.607643	0.000680699
1429389_at	Setmar	-0.563152	0.000681128
1453481_at	Zdhhc2	-0.60076	0.000681135
1455171_at	Suv420h1	-0.713356	0.000691921
1453035_at	Lnp	-0.768097	0.000693768
1426679_at	Zfp706	-0.879464	0.000694366
1429299_at	Ddah1	-0.701096	0.000694366
1419996_s_at	Arnt	0.465143	0.000696979
1446978_at	---	0.708887	0.000697927
1459861_s_at	Fbxl10	0.276071	0.000698633
1440228_at	Ranbp6	-1.36691	0.00069905
1423418_at	Fdps	-0.698962	0.000702111
1440822_x_at	Reps1	0.403669	0.000702735
1422886_a_at	Clk4	0.244897	0.000704389
1419398_a_at	Reep5	-0.632363	0.000708276
1419095_a_at	Apom	0.774497	0.000709754
1454606_at	4933426M11Rik	-0.313148	0.000713976
1424587_at	Gemin8	-0.328728	0.000718543
1431592_a_at	Sh3kbp1	-0.678327	0.00072876
1429720_at	Mak10	-0.341763	0.00072876
1439604_at	Adamts16	0.273305	0.00073277
1439426_x_at	Lzp-s	-0.396289	0.000737984
1428718_at	Scrn1	-1.06068	0.000741371
1427548_a_at	Clns1a	-0.885281	0.000741766
1453742_at	Vps33a	-1.09177	0.000742543
1451693_a_at	Fgf12	-0.946235	0.00074307
1448383_at	Mmp14	-0.255224	0.00074307
1418627_at	Gclm	-0.321302	0.00074307
1442272_at	1700021K10Rik	0.307632	0.00074307
1429291_at	Psmd1	-0.281409	0.000748214
1450064_at	---	-0.482098	0.000749097
1436262_x_at	Otud5	0.598716	0.000754909
1417350_at	Pldn	-0.850173	0.000759494
1424981_at	Nln	-0.894078	0.00075996
1453198_at	Zfp422-rs1	-0.46424	0.0007623
1421947_at	Gng12	-0.554053	0.0007623
1426626_at	Gtf2f2	-0.633778	0.0007623
1453761_at	Phf6	-1.36945	0.000767407
1436648_at	Nanos1	-0.878106	0.000770279
1434993_at	B830045N13Rik	-0.371283	0.000771008
1421333_a_at	Mynn	-1.07988	0.000775842
1448933_at	Pcdhb17	-0.302153	0.00077611
1435621_at	Mlstd1	-1.0318	0.00077611
1425833_a_at	Hpca	-0.917196	0.000776946
1419190_at	Vti1a	-0.98208	0.00077752
1450172_at	Pknox1	-0.399959	0.000777942
1451058_at	Mcts2	-0.522144	0.000778646
1418703_at	Rbms1	-0.236741	0.000778646
1429384_at	Csnk1g3	-0.892664	0.000780947
1450227_at	Ankrd6	-0.984528	0.000784681
1425342_a_at	Kcnk3	-1.11314	0.000785088
1428941_at	Zmym2	-0.772709	0.000787538
1417888_at	Trim13	-1.12887	0.000788996
1437079_at	Slc18a2	-0.987668	0.000791133
1431304_a_at	Tmem183a	-1.25969	0.000796114
1417874_at	Tmem9b	-0.778498	0.000797796
1438196_at	Gpd1l	-1.22178	0.000802868
1422243_at	Fgf7	-0.963542	0.000802955
1426189_at	Dusp15	-0.717671	0.000803212
1417752_at	Coro1c	-1.58712	0.000804462
1448192_s_at	Prps1 /// AU021838	-0.992708	0.000804462
1429376_s_at	Anapc10	-0.395938	0.000804991
1451493_at	Ndfip1	-0.791744	0.000805012
1451730_at	Zfp62	-0.551747	0.000808582
1441871_at	1810044D09Rik	0.637012	0.000810926
1417403_at	Elovl6	-0.243572	0.000815268
1417712_at	Eif2s2	-0.281782	0.000816861
1421495_a_at	1700052N19Rik	-0.951792	0.000817582
1422969_s_at	Ihpk1	-0.678292	0.000817582
1426503_a_at	Rnf121	-0.794708	0.000822375
1427345_a_at	Sult1a1	0.375844	0.000822375
1453206_at	Acad9	-0.441209	0.00082536
1423219_a_at	Mrpl49	-0.668605	0.000826672
1431431_a_at	Nfs1	-1.02835	0.000826672
1435947_at	2810455D13Rik	-0.384402	0.000827966
1439029_at	Gpt2	-1.08168	0.000827966
1424575_at	Rabl5	-0.610344	0.000828656
1435117_a_at	C330021A05Rik	-0.369189	0.000829504
1453077_a_at	Snapc3	-0.82362	0.000829838
1427708_a_at	Nf2	-0.79521	0.000833071
1426968_a_at	Rdh10	-0.271356	0.000833071
1425319_s_at	6530403A03Rik	0.507273	0.000833071
1455202_at	Gm50	-0.675011	0.000834451
1436429_at	Zfp606	-0.720343	0.000834451
1439266_a_at	Polr3k	-0.427611	0.000834451
1419664_at	Srr	-0.829855	0.000834548
1431827_a_at	Tlk2	-0.581857	0.000837674
1431200_a_at	Dph3	-0.630875	0.000841633
1418819_at	Arl8b	-1.37336	0.000846005
1442051_at	---	-0.616514	0.000846005
1427567_a_at	Tpm3	-0.705631	0.00085006
1459513_at	---	0.886616	0.000854482
1421833_at	Pip5k1a	-0.7009	0.000854817
1450379_at	Msn	-0.836824	0.000855433
1420607_at	Rbm18	-1.23031	0.000856037
1433499_at	2010005J08Rik	-0.667631	0.000858054
1436919_at	Trp53i11	-0.413273	0.000858732
1450882_s_at	Gpr137b /// LOC664862 /// LOC673335	-0.962349	0.000859268
1416562_at	Gad1	-1.14993	0.000860872
1450970_at	Got1	-0.678385	0.000861904
1438686_at	Eif4g1	-0.863773	0.000869689
1452605_at	Thnsl1	-0.579904	0.000882144
1452856_at	Crebzf	-0.543404	0.00088538
1433836_a_at	8430408G22Rik	0.893092	0.000886111
1452942_at	Tmem65	-0.594926	0.000886425
1431789_s_at	Tmed5	-0.700921	0.000902293
1418889_a_at	Csnk1d	-1.25836	0.000914169
1452735_at	Pcnp	-0.60733	0.000914208
1452490_a_at	Ap2a2	-0.928877	0.000914208
1448310_at	Ick	-0.384272	0.000914208
1442889_at	---	-0.517695	0.000914208
1423537_at	Gap43	-0.389228	0.000917183
1453915_a_at	Slc37a3	-0.55753	0.000917183
1431746_a_at	Ube1c	-1.00212	0.000919841
1431037_a_at	Elavl1	-0.871692	0.000920508
1439672_at	Synj1	0.40105	0.000921587
1434283_at	Arid5b	-0.287866	0.000922214
1452920_a_at	Ppil2	-0.498498	0.000922214
1452632_at	LOC637741	0.479855	0.000930695
1455624_at	---	0.439344	0.000930695
1419554_at	Cd47	-0.184423	0.000942259
1426383_at	Cry2	0.479228	0.000942259
1420753_at	Tll1	-1.16532	0.000945262
1448456_at	Cln8	-0.81443	0.000945262
1428829_at	6820401H01Rik	-0.323898	0.000945262
1417539_at	Slc35a1	-0.81584	0.000947655
1453257_at	Agpat5	-0.385561	0.000952844
1427566_at	Wfikkn1	0.668687	0.000953589
1458742_at	Lphn3	-0.578204	0.000954289
1430869_a_at	Hoxc13 /// Habp4 /// LOC671769	-0.94608	0.00096268
1427478_at	Usp12	-1.23027	0.000966071
1418621_at	Rab2	-0.939909	0.000966071
1460400_at	Spast	-0.645265	0.000967455
1416818_at	Parva	-1.91024	0.000967915
1431137_at	Rusc1	-0.939965	0.000977672
1435751_at	Abcc9	0.625966	0.000978272
1449228_at	Sh3gl2	-1.33527	0.000982746
1435009_at	Slc9a6	-1.41104	0.00098736
1426646_at	9130011J15Rik	-0.34158	0.00098736
1419251_at	Eps15	-1.18403	0.000990069
1451608_a_at	Tspan33	0.619396	0.000991947
1437774_at	1700020I14Rik	-0.381792	0.000992295
1452191_at	Prcp	-0.477575	0.000992295
1419200_at	Fxyd7	-0.721551	0.000993268
1455924_at	Rab6b	-1.07128	0.000994401
1450208_a_at	Elmo1	-1.38839	0.000996531
1417509_at	Rnf19	-0.754059	0.00099696
1433567_at	Gmps	-0.270483	0.00099696
1455265_a_at	Rgs16	0.299038	0.00099696
1452711_at	Spg3a	-0.624494	0.00100684
1430137_at	Map3k13	-0.464185	0.00100819
1426736_at	Gspt1	-0.538589	0.00100819
1422576_at	Atxn10	-0.500403	0.00100826
1421815_at	Epdr2	-1.23393	0.00100884
1456518_at	4930422I07Rik	-0.915855	0.00100884
1453380_a_at	Xrcc6bp1	-0.794817	0.00100884
1439452_x_at	Dnpep	0.417757	0.00101254
1421874_a_at	Mrps23	-0.855712	0.00101377
1442662_at	Tmem167	-0.71854	0.00101576
1431724_a_at	P2ry12	-1.0675	0.00101999
1449438_at	Dpm1	-0.59575	0.00102224
1455480_s_at	Ube2d3	-1.31631	0.00102425
1455935_at	2410131K14Rik	-0.463393	0.00102425
1423053_at	Arf4	-0.768961	0.00102425
1436383_at	Cplx2	-0.370277	0.00102425
1450078_at	Nrk	-1.18832	0.00102545
1431613_a_at	1700024D23Rik	-1.03877	0.00102545
1415697_at	G3bp2	-0.874931	0.00102743
1443401_at	---	-0.630999	0.00102743
1428618_at	Hcfc2	-0.447177	0.00102743
1425542_a_at	Ppp2r5c	-0.628883	0.00102891
1431091_at	Pygo1	-0.988554	0.00103651
1424691_at	5930434B04Rik	-0.691421	0.00103696
1440210_at	Cacng2	0.210989	0.00103696
1426480_at	Sbds	-0.350516	0.00103696
1456798_at	9330118A15Rik	-0.67763	0.00103696
1439487_at	Lig4	-0.466546	0.00103696
1454043_a_at	Kcnab1	-1.5674	0.00103696
1450898_at	Hiat1	-0.671143	0.00104086
1452527_a_at	P2rx4	-0.792332	0.00104327
1429186_a_at	Cdadc1	-0.819388	0.00104486
1460314_s_at	Hist2h3c1 /// Hist2h3c2 /// Hist1h3g /// Hist1h3f /// Hist1h3c /// Hist1h3d /// Hist1h3b /// Hist1h3e /// Hist1h3h /// Hist1h3i /// Hist2h3b /// Hist1h3a	-0.753027	0.00104489
1451111_at	Nup133	-0.830074	0.00104489
1431744_a_at	Smap1	-1.02349	0.00104489
1422471_at	Pex13	-0.341003	0.00104859
1458183_at	2810039B14Rik	-0.510674	0.00104859
1424548_at	Zgpat	-0.578196	0.00104903
1420951_a_at	Son	-1.37857	0.00105086
1460286_at	6-Sep	-0.90449	0.00105245
1441935_at	Ankra2	1.39621	0.00105252
1452514_a_at	Kit	-0.499942	0.00105912
1425321_a_at	Clmn	-0.576946	0.00105912
1425348_a_at	Srprb	-0.333618	0.00105917
1441208_at	Hdhd2	-0.646955	0.00105917
1416288_at	Dnaja1	-0.312114	0.00106487
1418253_a_at	Hspa4l	-0.744843	0.00106822
1425270_at	Kif1b	0.509898	0.00106822
1428788_at	1700012G19Rik	-0.20877	0.00106822
1453074_at	Dusp23	-0.415885	0.00106822
1439561_at	2010012O05Rik	-0.222588	0.00106822
1452463_x_at	Igk-V28	1.13748	0.00106822
1421862_a_at	Vamp1	-1.4332	0.00106822
1418440_at	Col8a1	0.850112	0.00106822
1435298_at	Cog5	-0.557796	0.00106822
1418896_a_at	Rpn2	-0.29993	0.00106971
1422702_at	Azin1	-0.762352	0.00106971
1439041_at	Slc39a10	-0.833172	0.00107077
1453822_at	Dnalc1	0.563924	0.00107077
1453726_s_at	2810407C02Rik	-0.945612	0.001071
1441358_at	Pcdhb16	-0.71882	0.00108035
1418003_at	1190002H23Rik	-0.354755	0.00108035
1459245_s_at	Grid2	-1.82249	0.00108247
1418459_at	Ccdc91	-0.577934	0.00108772
1419559_at	Cyp4f14	-0.393767	0.00109023
1421830_at	Ak3l1	-0.406721	0.00109699
1429533_at	Immt	-1.69008	0.00110015
1416033_at	Tmem109	-0.568773	0.00111063
1429381_x_at	Igh-VJ558 /// LOC544903 /// LOC544907 /// LOC633774 /// LOC676478 /// LOC677563	1.17598	0.00113163
1450878_at	Sri	-0.546923	0.00113324
1417982_at	Insig2	-0.719613	0.00113891
1453762_at	Vps26b	-1.13702	0.00113904
1416994_at	Ttc1	-0.714324	0.00114386
1424772_at	H2afj /// LOC632401	-0.628988	0.00115282
1440050_at	Hbs1l	-0.777886	0.00115955
1434773_a_at	Slc2a1	0.626606	0.00116786
1425281_a_at	Tsc22d3	-0.556453	0.00116786
1431252_a_at	Zfp655	-0.991726	0.00117896
1450730_at	Hs2st1	-0.397097	0.00118383
1457740_at	Arntl	-0.35826	0.00118767
1429057_at	Narg1l	0.360286	0.00119039
1430519_a_at	Cnot7	-0.795124	0.00119279
1420666_at	Doc2b	-1.28761	0.00119304
1460044_at	Onecut2	-0.707982	0.00119308
1422279_at	Fv1	-0.75332	0.00119308
1451792_a_at	Pja1	-1.34677	0.00119532
1427455_x_at	Igk-C /// Igk-V28 /// Igk-V8-16	1.67622	0.00120352
1416123_at	Ccnd2	0.576518	0.00120427
1443872_at	2-Mar	-0.202563	0.00120427
1427869_at	Igh-6	1.0475	0.00120458
1455793_at	BC035537	-0.378848	0.00120589
1451010_at	Nol11	-0.901395	0.00121197
1451264_at	Frmd6	-0.266722	0.00121502
1425361_at	Zfp397	-0.717693	0.00121508
1452175_at	1810026J23Rik	-1.03357	0.00121513
1456618_at	Mark4	-0.675741	0.00121806
1441541_at	Smek2	-0.462029	0.0012287
1451340_at	Arid5a	-0.295463	0.0012287
1423143_at	Gtpbp4	-0.434	0.00123073
1420937_at	Cpsf2	-0.212656	0.00123648
1429502_at	Stch	-0.985327	0.00124263
1420617_at	Cpeb4	-0.555828	0.00124777
1421731_a_at	Fen1	-0.456829	0.00124794
1421255_a_at	Cabp1	-0.363469	0.00125022
1455702_at	---	-0.48657	0.00125038
1421845_at	Golph3	-1.33452	0.00125084
1441960_x_at	5730494M16Rik	-0.451385	0.00125084
1423265_at	Minpp1	-0.477541	0.00125084
1440824_at	Fbxo45	0.440346	0.00125369
1424053_a_at	Tcf25	-0.614314	0.00125741
1427944_at	C1qdc1	0.887143	0.00125741
1429198_at	1810030O07Rik	-0.71256	0.00126498
1424875_at	Spg20	-1.27606	0.00126502
1416022_at	Fabp5	-0.541954	0.00126836
1437513_a_at	Serinc1	-1.57294	0.00126863
1423331_a_at	Pvrl3	-0.606417	0.00126863
1421491_a_at	Tmem49	-0.851405	0.00126863
1437536_at	Fkrp	-0.782469	0.00127491
1431030_a_at	Rnf14	-2.26615	0.00127491
1449682_s_at	Tubb2b	-1.42221	0.00128451
1419439_at	Stk22s1 /// LOC672873	1.07802	0.00128691
1443579_s_at	Depdc6	-0.595987	0.00129212
1451972_at	Glcci1	-0.477591	0.00129212
1425578_a_at	Gfra2	0.383555	0.00129558
1446022_at	---	0.561378	0.00129718
1458347_s_at	Tmprss2	0.888711	0.00130543
1449866_at	Syt2	-1.00638	0.00131175
1445275_at	C130092O11Rik	-0.59988	0.00131269
1458670_at	Adarb2	-1.36123	0.00133777
1436325_at	Rora	-0.974029	0.00134299
1438550_x_at	Srr	-0.848585	0.00134932
1423519_at	2210412D01Rik	-0.587749	0.00134986
1423349_at	Socs5	-0.482228	0.00136294
1451036_at	Spg21	-0.728196	0.00136372
1416235_at	Lrrc59	-1.11993	0.00136465
1429775_a_at	Gpr137b /// LOC664862 /// LOC673335	-0.825324	0.00136572
1455734_at	Crbn	-0.557476	0.00136811
1453485_s_at	1110005A03Rik	-0.406101	0.00138149
1436176_at	Syt11	-0.386443	0.00138191
1428757_at	Aasdhppt	-0.747408	0.00138191
1451516_at	Rhebl1	-0.315783	0.00138253
1423746_at	Txndc5	-0.834171	0.00138351
1430236_s_at	Gsdm2	1.08687	0.00138351
1426229_s_at	Kras	-1.15333	0.00138375
1425748_at	Diras1	-1.20696	0.00138819
1437417_s_at	Gpc6	-0.245488	0.00139414
1451358_a_at	Racgap1	-0.621385	0.00140801
1441440_at	Atg4c	0.443478	0.00140801
1422078_at	Akt3	-1.47254	0.00140801
1455109_at	Tbl1xr1	-0.430463	0.00140914
1456682_at	Lonrf2	-1.32361	0.00141549
1424715_at	Retsat	-0.580411	0.0014214
1451339_at	Suox	-0.613551	0.00142522
1419544_at	Atp6v1c1	-0.62597	0.00143642
1418020_s_at	Cpd	-1.08466	0.00143642
1424305_at	Igj	0.937284	0.00143642
1435115_at	Fndc5	-0.287259	0.00144501
1429218_at	Det1	-0.535092	0.00144698
1419012_at	Zfpm2	-0.799165	0.00144722
1433479_at	5730410I19Rik	-1.07916	0.00144722
1428228_at	Pgm3	-0.523998	0.00145148
1459651_s_at	Nup54	-0.30341	0.00147193
1426146_a_at	Chpt1	-1.05098	0.00147193
1430310_at	Tspan11	-0.714469	0.00147665
1432384_a_at	Mettl6	-0.824653	0.00147748
1433508_at	Klf6	-0.337635	0.00147787
1416229_at	Rfk	-0.949318	0.00147811
1420383_a_at	Col4a3bp	-0.549727	0.0015028
1434020_at	Pdap1	0.573528	0.00150394
1453172_at	Stch	-0.286316	0.00150655
1426001_at	Eomes	-0.666597	0.00151125
1426955_at	Col18a1	0.337812	0.00151284
1429187_at	Tmed7	-1.51976	0.00151316
1423361_at	Yme1l1	-0.687813	0.00151446
1426593_a_at	Fbxo22	0.552623	0.00151948
1442843_at	4933411D12Rik	0.34752	0.00152731
1448603_at	Srpk2	-0.939905	0.00153527
1420856_a_at	Lancl2	-0.978547	0.00154339
1452082_at	6430548M08Rik	-0.425145	0.00154394
1422949_at	Nos1	-1.48053	0.00154394
1430623_s_at	Obfc2a	-0.754637	0.00154408
1416346_at	Timm8a1	-0.682174	0.00154745
1449550_at	Myo1c	0.50189	0.00154745
1416559_at	1500003O22Rik	-0.417102	0.00154745
1431016_at	Cwf19l1	-0.810134	0.00154842
1415990_at	Vdac2	-0.315539	0.00155369
1428399_a_at	Armc9	-0.521191	0.00155587
1430053_a_at	Gtpbp9	-0.922868	0.00155587
1448348_at	Gpiap1	-1.81203	0.00155781
1450354_a_at	Ptdss2	-0.614852	0.00156632
1423452_at	Stk17b	-0.491379	0.00156632
1428398_at	B3galt5	-0.915148	0.00156882
1453988_a_at	Ide	-1.20008	0.00157079
1442030_at	---	-0.509534	0.00157864
1451943_a_at	Ppm1a	-1.01707	0.00157864
1452220_at	Dock1	-0.275855	0.00158479
1452467_at	Mmab	-0.864688	0.0015876
1426972_at	Sec24d	-0.388196	0.00159935
1448541_at	Kns2	-1.453	0.00160036
1423179_at	Kcnb1	-0.496183	0.00160441
1426066_a_at	Dtna	-1.04343	0.00160603
1453736_s_at	B230219D22Rik	-1.15014	0.00160603
1427754_a_at	Dnm1	-0.744086	0.00161172
1450022_at	Gtpbp1	-0.826503	0.00161181
1453164_a_at	Ptdss2	-0.695151	0.00161181
1439302_at	Ube1l2	-0.534778	0.00161566
1453581_at	Cep170	-0.423772	0.00161788
1454174_a_at	C330007P06Rik	-1.58959	0.00161999
1449514_at	Gprk5	-0.637694	0.00162401
1430849_a_at	Cgrrf1	-0.712223	0.00162439
1415765_at	Hnrpul2	-0.424245	0.00162774
1439077_at	Zxda /// LOC668171	-0.383952	0.00163325
1443701_at	BC025575	-0.402782	0.00163409
1450860_at	Lap3	-0.537782	0.00163448
1453668_at	3110052M02Rik	-0.556317	0.00163511
1460476_s_at	1200015N20Rik	-0.652662	0.0016508
1429234_s_at	11-Sep	-0.460526	0.00165115
1429520_a_at	Phca	-0.568223	0.00165139
1444359_at	Zfp777	-0.416045	0.0016545
1436393_a_at	Trim37	-0.894086	0.0016545
1434381_at	BC060631	-0.547737	0.0016545
1437845_x_at	Pofut2	0.483942	0.00165948
1421065_at	Jak2	-0.554489	0.00166088
1451658_a_at	Polr3c	-0.92483	0.00166122
1415868_at	Cct4	-0.65484	0.00166654
1421312_a_at	Kifc2	0.234415	0.00166654
1450729_at	Hs2st1	-0.570135	0.00166654
1439316_at	Rbm39	0.317984	0.00167027
1423054_at	Wdr1	-0.77375	0.00167027
1424667_a_at	Cutl1	-0.423142	0.00167418
1437772_s_at	Fuca1	-0.744397	0.00167418
1426376_at	Reep5	-0.448533	0.0016761
1455520_at	LOC629605	-0.499468	0.00167632
1452093_at	2500001K11Rik	-0.269602	0.00168241
1420646_at	D10Ertd438e	-1.35616	0.00168723
1424885_at	Klhdc8a	-0.428243	0.0016881
1418584_at	Ccnh /// LOC672655	-0.573632	0.00168894
1457264_at	Phf20l1	0.41752	0.00168894
1420976_at	Man1a2	-1.05103	0.00169556
1424735_at	Slc25a25	-0.537867	0.00170234
1451344_at	Tmem119	-0.505704	0.00170686
1420847_a_at	Fgfr2	-1.14606	0.00171258
1425351_at	Srxn1	-1.05583	0.00171575
1428557_a_at	Osgepl1	-0.429739	0.00171741
1448190_at	Mrpl33	0.631367	0.00171741
1425680_a_at	Btrc	-0.314537	0.00172183
1426023_a_at	Rabep1	-1.06969	0.00172654
1444318_at	Chchd7	-0.628362	0.00172992
1429351_at	Klhl24	-0.577515	0.00173482
1457843_at	Lypd6	-0.827311	0.0017374
1452112_a_at	Rbm4b	-0.733978	0.00173813
1424536_at	Oas1e	0.469153	0.00174028
1424389_at	Nupl1	-0.850539	0.00174028
1421005_at	Cep110	0.933082	0.00174462
1440619_at	Mapk8ip1	0.904269	0.00175335
1426187_a_at	Hax1	-0.372966	0.00175335
1450847_at	Ncbp2	-0.605922	0.00175378
1450015_x_at	Sgpp1	-1.38917	0.00175859
1439300_at	---	-0.473922	0.00175859
1449348_at	Mpp6	-0.264767	0.00175919
1453623_a_at	Rad23a	-0.914202	0.00177872
1424332_at	Rab40c	-0.933474	0.00177936
1427535_s_at	AW822216	0.282815	0.00178561
1455372_at	Cpeb3	-0.420705	0.00178561
1450845_a_at	Bzw1	-0.98882	0.00179173
1421139_a_at	Zfp386	-0.789624	0.00179322
1449503_at	Kpna1	-1.02032	0.00179846
1450295_s_at	Pvr	-0.535004	0.00179925
1443962_at	Tfdp2	-0.481094	0.00180023
1422570_at	---	-0.803466	0.00180134
1422764_at	Mapre1	-0.478694	0.00180851
1449300_at	Cttnbp2nl	-0.681651	0.00181397
1455166_at	AW146430	-0.306884	0.00181866
1421891_at	St3gal2	-0.579637	0.00182238
1431686_a_at	Gmfb	-1.67436	0.00182624
1450016_at	Ccng1	-1.16425	0.00182823
1424677_at	Cyp2j9	-0.311016	0.00183301
1427071_at	Fbxo42	-0.447646	0.00183301
1440271_at	---	-0.477083	0.00183374
1455908_a_at	Scpep1	0.625667	0.00183374
1431274_a_at	---	-1.53972	0.00183374
1417534_at	Itgb5	-0.317035	0.00183374
1425452_s_at	Ptprj /// AW125753	-0.640942	0.00183374
1423720_a_at	Sar1a	-1.17658	0.00183779
1415843_at	Gbl	-1.03637	0.00184133
1439967_at	1700071A11Rik	-0.707714	0.00185039
1427831_s_at	Zfp260 /// LOC635007	-0.902966	0.00186549
1420634_a_at	Smad2	-0.504795	0.00186919
1431183_at	1700066M21Rik	-1.32547	0.0018781
1436209_at	Dnajc16	-0.376267	0.00188133
1450385_at	Kpna3	-1.15232	0.00188133
1431071_at	Mtx3	-0.835442	0.00188262
1457283_at	---	-0.394102	0.00189976
1425227_a_at	Atp6v0a1	-2.61489	0.00189976
1416317_a_at	Stambp	-1.15916	0.00189976
1450693_at	Rgs17	-0.261953	0.00190633
1453836_a_at	Mgll	-0.723434	0.00190945
1430307_a_at	Mod1 /// LOC624892 /// LOC677317	-0.76044	0.00191059
1436508_at	2410014A08Rik	-0.558668	0.00191059
1448820_a_at	Eif2s2	0.579472	0.00191718
1440179_x_at	Ibrdc1	-0.399437	0.00192029
1423041_a_at	Bzw1	-0.671272	0.00192094
1444758_at	4930595D18Rik	0.634833	0.00192918
1421102_a_at	Vamp3	-1.23771	0.00193195
1417728_at	Mbd3	-0.271648	0.00193605
1419652_s_at	2610200G18Rik	-0.395307	0.00193605
1417383_at	Entpd5	-0.650773	0.00193605
1453744_a_at	Ankrd40	-0.899681	0.00193703
1421478_a_at	Zfp318	-0.378424	0.00194482
1447007_at	1700008I05Rik	0.726933	0.0019462
1436502_at	Mtus1	-0.832248	0.00195647
1450025_at	Pard6g	-0.816789	0.00196451
1452262_at	Grpel2	-0.268155	0.00196661
1451156_s_at	Vldlr	-1.04975	0.00197151
1437711_x_at	Odc1 /// LOC666231 /// LOC668343 /// LOC670279 /// LOC671973 /// LOC673302	0.406881	0.00197464
1416437_a_at	Mapk8ip3	-0.77895	0.00199271
1425855_a_at	Crk	-1.22324	0.00200724
1425326_at	Acly	-1.03564	0.00200983
1421026_at	Gna12	-1.24269	0.00201152
1450506_a_at	Isg20l1	-0.819646	0.00201152
1425520_a_at	Dhdds	-0.844467	0.00201501
1424917_a_at	Wipi1	-0.586026	0.00201501
1418532_at	Fzd2	-0.514768	0.00202924
1426233_at	Map2k4	-0.60127	0.00203086
1452200_at	D11Ertd497e	-0.471505	0.00203092
1424859_at	Homer3	-0.312636	0.00203826
1454125_a_at	4930563E19Rik	0.71051	0.00203826
1448309_at	Ap3m1	-1.15567	0.00203972
1431606_a_at	Angel2	-1.01024	0.00204875
1416549_at	Slc35b4	-0.545098	0.00205167
1450115_at	Gnaq	-1.35172	0.00205811
1432566_at	1700129I15Rik	0.630855	0.00205901
1438661_a_at	Arf2	-1.1799	0.00205901
1443952_at	Thra	0.339581	0.00206264
1425550_a_at	Prkar1a	-0.979986	0.00206351
1417983_a_at	Ube2v2	-0.292066	0.00206351
1419030_at	Ero1l	-0.793405	0.00206351
1427660_x_at	Igk-C /// Igk-V28 /// Igk-V8-16	2.25517	0.00206999
1439190_at	Fhad1	0.741226	0.00206999
1448787_at	Moap1	-0.35879	0.00207036
1420547_at	Galc	-1.06688	0.00208471
1455726_at	Gm71	-0.500685	0.00209076
1458518_at	Cpeb2	-1.12887	0.00209076
1428541_at	3321401G04Rik	0.235679	0.00209338
1428198_at	Adal	-0.375403	0.00209543
1434750_at	Exoc3	-0.305857	0.00209962
1426402_at	Syncrip	-0.319382	0.00209962
1424500_at	Utp6	-0.719084	0.00209962
1435800_a_at	Csda	0.54937	0.00210555
1423636_at	Wdr31	-0.372786	0.00210555
1427148_at	Pja2	-1.17517	0.00210586
1437714_x_at	Usp14	0.61373	0.00210586
1450370_a_at	Kcnip4	-1.253	0.00210608
1427188_at	Arih1	-1.14953	0.00210832
1424468_s_at	Phldb1	0.323299	0.00211997
1437363_at	Homer1	-0.319305	0.00211997
1453737_at	Wipf2	-0.468077	0.00211997
1435110_at	Unc5b	-0.31023	0.00211997
1429121_at	4921517N04Rik	-0.987342	0.00211997
1455504_a_at	Mkrn1	-0.933732	0.00211997
1423247_at	Txndc4	-0.554763	0.00212232
1439326_at	Lnpep	-0.534756	0.00212253
1426575_at	Tmem23	-0.57473	0.00212622
1417341_a_at	Ppp1r2	-1.18164	0.00213438
1451117_a_at	Tom1l1	-0.45169	0.00214098
1449217_at	Casp8ap2	0.251608	0.00214098
1435532_at	4933426K21Rik	-0.685352	0.00214098
1448117_at	Kitl	-0.984591	0.00214271
1417677_at	Opn3	-0.658068	0.00214628
1421282_at	Bmp5	-1.22326	0.00214718
1427273_at	D130054N24Rik	-0.493288	0.00215496
1441192_at	Scly	0.364342	0.00215592
1422473_at	Pde4b	-0.248361	0.0021631
1425577_at	9830124H08Rik	0.23946	0.0021664
1420508_at	Sema3f	0.318036	0.00217416
1429110_a_at	Nsun4	-0.575083	0.00218835
1422959_s_at	Zfp313	-0.990305	0.0021904
1433518_at	Lcmt2	-0.534449	0.00220931
1426090_a_at	Fert2	-0.950049	0.00220931
1447751_x_at	Dus2l	-0.54814	0.00221798
1432431_s_at	2900006F19Rik	-0.530538	0.00223481
1419066_at	Ier5l	-0.36763	0.00223527
1430378_at	2900011G08Rik	-0.730656	0.00223682
1452638_s_at	Dnm1l	-2.5645	0.00223682
1422972_s_at	Gcn5l2	-0.347363	0.00224352
1415684_at	Atg5	-0.674932	0.00225419
1417624_at	Nab1	0.278243	0.00226223
1438854_x_at	Pitpnm1	0.384146	0.00226429
1441840_x_at	Sbno2	1.03401	0.00226735
1442014_at	Ifrd1	0.449224	0.00226735
1439083_at	Ahi1	-1.37708	0.00226735
1415677_at	Dhrs1	-0.416435	0.00226735
1421013_at	Pitpnb	-1.49923	0.00226878
1458443_at	Crtc1	-0.702421	0.00226956
1448545_at	Sdc2	-0.500177	0.00227001
1450396_at	Stag2	-1.15957	0.00227052
1423026_at	Rad51c	-0.67518	0.00227706
1452261_at	Shprh	-0.390241	0.00228733
1441899_x_at	Bcan	0.430666	0.00229402
1450193_at	Hcn1	-0.33082	0.00231581
1420405_at	Slco1a4	0.56747	0.00231581
1436372_a_at	2210010A19Rik	-1.0348	0.00231581
1429437_at	Prpf40a	-0.323089	0.0023164
1420419_a_at	Otof	0.785076	0.0023164
1425403_at	Dnm3	-0.566013	0.0023164
1451551_at	Krt84	0.480739	0.0023164
1428124_at	Gtf2e1	-0.620161	0.00232043
1420878_a_at	Ywhab	-1.07733	0.00232336
1448772_at	Ube2a	-0.52218	0.00232336
1418082_at	Nmt1	-0.871124	0.0023314
1431278_s_at	Pla2g6	-0.615582	0.00233372
1437944_at	Shc2	-0.643481	0.00233372
1415807_s_at	Sfrs2	-0.897054	0.00233372
1429914_at	Epc1	-0.586036	0.00233372
1443859_at	Rsbn1	-0.937981	0.00233372
1456324_at	Zfp748	-0.435145	0.00234393
1439255_s_at	Gpr137b /// LOC664862	-0.300484	0.00234961
1422736_at	Ranbp9	-0.657532	0.00235202
1437520_a_at	Nup85	0.718637	0.00235284
1422293_a_at	Kctd1	-0.636266	0.00235993
1435867_at	---	-0.221524	0.00236841
1448586_at	Hspa14	-0.35658	0.00236958
1426683_at	Cnot6	-0.485351	0.0023746
1415957_a_at	Nnp1	-0.536415	0.0023746
1435877_at	Stk38l	-0.741888	0.0023746
1451196_at	Ypel5	-0.344264	0.00237514
1453102_at	Flrt3	-0.305967	0.00237613
1417114_at	Gmcl1	-0.617073	0.00238798
1451229_at	Hdac11	-0.180319	0.00239324
1449504_at	Kpna1	-1.59826	0.00240032
1458753_at	Gm941	-1.2322	0.00240488
1425206_a_at	Ube3a	-1.03406	0.00240488
1419548_at	Kpna1	-0.741478	0.00240491
1428880_at	0610038F07Rik	-0.549649	0.00240911
1416463_at	Gpiap1	-0.553121	0.00242884
1424301_at	Zfp219	0.24453	0.00243012
1424918_at	Tbc1d19	-0.327699	0.00243643
1419257_at	Tcea1	-1.07157	0.00243714
1425462_at	Fbxw11	-0.326665	0.0024432
1415834_at	Dusp6	-0.497563	0.00244715
1425461_at	Fbxw11	-2.0201	0.00245265
1424344_s_at	Eif1a	-0.3416	0.00245458
1422539_at	Extl2	-0.409661	0.00245994
1455007_s_at	Gpt2	-0.383778	0.00246
1426081_a_at	Dio2	-0.698311	0.00246859
1425551_at	Hip1r	-0.537324	0.00246913
1418632_at	Ube2h	-0.790488	0.00246913
1460650_at	Atp6v0a1	-1.09854	0.00248842
1443799_at	---	0.463179	0.00250135
1453024_at	Wdr37	-0.357489	0.00250785
1459848_x_at	Dbh	0.435431	0.00250902
1450439_at	Hcfc1	-1.09675	0.00251435
1415694_at	Wars	-0.282375	0.00252228
1418667_at	2410002O22Rik	-0.473729	0.00252228
1423734_at	Rac1	-0.963594	0.00252228
1420684_at	Acox3	-0.786869	0.00252228
1452100_at	Dullard	-0.242914	0.00252728
1416593_at	Glrx	-0.975232	0.0025342
1450376_at	Mxi1	-0.268466	0.00253701
1426425_at	Sugt1	-0.498248	0.00254423
1424796_at	1700054N08Rik	-0.658177	0.00254676
1452021_a_at	Hes6	-0.570315	0.00254676
1451723_at	Cnot6l	-0.562513	0.00254676
1422798_at	Cntnap2	-0.613619	0.00254676
1451805_at	Phip	-0.688374	0.00256311
1431923_at	Aifm3	-0.451665	0.00256315
1430976_a_at	Mrpl9	-0.707773	0.00256323
1451795_at	Tom1l2	-1.22651	0.0025651
1425197_at	Ptpn2	-0.588547	0.00257558
1434466_at	Atcay	-0.432478	0.00258052
1451724_at	Ankmy2	-0.671918	0.00258113
1448607_at	---	-0.928991	0.00258452
1432272_a_at	Ercc4	-1.38544	0.00258571
1421624_a_at	Enah	-0.68233	0.00259079
1424453_at	Pcyt1a	-0.721151	0.00259833
1419385_a_at	Ubqln1	-0.879774	0.00259833
1420624_a_at	Vamp8	-0.345936	0.00259996
1434352_at	B630005N14Rik	-0.548762	0.00260548
1453641_at	Bcas1	0.760631	0.00260879
1438285_at	2210015D19Rik	-0.411787	0.00262184
1429776_a_at	Dnajb6	-1.00495	0.00262564
1437183_at	Lrrc4b	-0.698315	0.00262564
1426094_at	Rhbdl1	-0.269344	0.00262785
1426629_at	Dhx8	-0.411402	0.0026289
1436997_x_at	Sh3bgrl	0.550736	0.0026385
1424891_a_at	Zw10	0.213917	0.00264765
1454230_a_at	Slc25a27	-0.680753	0.00265878
1434130_at	Lhfpl2	-0.829357	0.00265878
1454032_at	Neto2	-1.32728	0.00266064
1426857_a_at	Hsdl2	-0.687633	0.00266064
1439160_at	4732496O08Rik	-0.717075	0.00266443
1444151_at	Elavl3	0.350699	0.0026697
1420873_at	Twf1	-0.940524	0.00267162
1416146_at	Hspa4	-0.348582	0.00267721
1460171_at	Cops5	-0.304856	0.0026915
1427153_at	Bckdhb	-0.37703	0.0026915
1415945_at	Mcm5	-0.433502	0.0026915
1448302_at	Kctd20	-0.435313	0.00269314
1425030_at	Zfp622	-0.473113	0.00269852
1416541_at	Clpb	-0.367888	0.00269852
1457306_at	---	-0.478126	0.00269969
1456970_at	Cdh7	-0.778361	0.00270277
1419553_a_at	Rabggtb	-0.289666	0.00270277
1436412_at	Zc3h15	-0.542034	0.00270522
1450080_at	Cxx1c	-0.605356	0.002716
1441333_at	Trps1	-1.02508	0.002716
1434520_at	Sc5d	-0.375527	0.00271663
1450202_at	Grin1	-0.712937	0.00271663
1421063_s_at	Snrpn /// Snurf	-0.84306	0.00272106
1424013_at	Etf1	-0.415931	0.0027302
1421534_at	Dfna5h	-0.736397	0.00273809
1436792_at	Whdc1	0.302436	0.00274041
1443857_at	Hook3	-0.844912	0.00274515
1449936_at	8430419L09Rik	-1.33021	0.00274705
1452499_a_at	Kif2a	-0.904306	0.00274705
1424074_at	Btf3l4	-0.276841	0.00274705
1460439_at	BC033915	-0.381778	0.00274958
1455963_at	6332401O19Rik	-1.1203	0.00274958
1430332_a_at	Gusb	-0.640574	0.00275933
1443869_at	E430028B21Rik	-0.358573	0.00277653
1430613_at	1520402A15Rik	-0.359431	0.00279595
1425850_a_at	Nek6 /// LOC674247	-0.658559	0.00279595
1426785_s_at	Mgll	-0.191639	0.00279946
1419029_at	Ero1l	-0.992063	0.00279946
1436004_at	Usp27x	-0.39053	0.00280038
1423457_at	Slc35a5	-0.929456	0.00280317
1429165_at	3110001I22Rik	-0.322339	0.00282436
1434017_at	---	-0.382319	0.00282436
1460278_a_at	D15Wsu75e	-0.531466	0.00283006
1446990_at	Nfia	-0.400198	0.00283411
1450956_at	Scd3	-0.8009	0.00283411
1429130_at	Ttc25	0.669373	0.00283411
1448375_at	Tm9sf3	-1.186	0.00283844
1432029_a_at	Smap1	-0.631991	0.00285054
1447577_x_at	Pcca	0.708943	0.00285054
1444499_at	---	-0.72254	0.00285359
1457111_at	AA415038	0.30071	0.00285684
1419557_a_at	Tmem9	-0.621073	0.00286002
1441787_at	Zc3h12c	-0.912878	0.00286301
1436105_at	2310015A05Rik	-0.7699	0.00286301
1448460_at	Acvr1	-0.569234	0.00286301
1424136_a_at	Ppih /// LOC433064 /// LOC624822 /// EG665989 /// EG667598 /// LOC669441 /// LOC670964 /// LOC676493	-0.506172	0.00286875
1427194_a_at	Ercc8	-0.492362	0.00287624
1429462_at	Slc25a32	-0.57841	0.00287624
1447442_at	Helz	0.700193	0.00287624
1438782_at	Cntn4	-0.822823	0.00289662
1419805_s_at	Ggps1	-0.598145	0.0029198
1454817_at	Utp18	-0.452972	0.00292024
1416786_at	Acvr1	-0.920728	0.00292307
1429444_at	Rasl11a	-0.449302	0.00292307
1452162_at	Wdr48	-0.643819	0.00294622
1450722_at	Nup50	-0.322986	0.0029499
1426998_at	Zfand3	-0.373321	0.00296294
1449507_a_at	Cd47	-0.803874	0.00296294
1429492_x_at	Ptdss2	0.3575	0.00296484
1428025_s_at	Pitpnc1	-0.614875	0.00296563
1434594_at	Dnahc1	0.917848	0.00296569
1430449_at	C330002I19Rik	-1.05627	0.00296569
1434706_at	Vcpip1	-0.368083	0.0029695
1443837_x_at	Bcl2	0.283044	0.00297142
1423459_at	Cops2	-0.495036	0.00297698
1452300_at	2410005O16Rik	-0.956935	0.0029839
1423488_at	Mmd	-0.593076	0.0029839
1416386_a_at	M6pr	-0.768082	0.00299143
1417975_at	Kpna4	-1.24847	0.00299559
1421313_s_at	Cttn	-0.634558	0.00300063
1426478_at	Rasa1	-0.760023	0.00300072
1417462_at	Cap1	-0.971374	0.00302281
1453853_a_at	Arhgef12	-0.67869	0.00303231
1455663_at	Olfml1	-0.616385	0.0030337
1425161_a_at	Trabd	-0.684416	0.00303418
1429479_at	6430590I03Rik	-0.397218	0.00303565
1449129_a_at	Kcnip3	-1.34892	0.00303896
1437568_at	Mmp16	-0.885913	0.00305487
1427289_at	Ddhd1	-0.367544	0.00306097
1447559_at	AI834762	-0.403346	0.00306345
1424654_at	Acp2	-0.508451	0.00306556
1454612_at	Rkhd2	-0.258494	0.00306928
1438198_at	Bri3bp	-0.209241	0.00306928
1454239_at	4930578G10Rik	-0.380154	0.00306992
1416572_at	Mmp14	-0.740797	0.00308715
1437201_at	Lrrc4c	-0.272778	0.00309087
1417681_at	Nudt21	-0.343245	0.00309087
1452134_at	Tmem175	-0.504041	0.00309636
1460626_at	11-Sep	-0.344081	0.00309685
1424229_at	Dyrk3	-0.617994	0.00310039
1431375_s_at	Parva	-0.419372	0.00310487
1418735_at	Krt4	0.574899	0.00310859
1450351_a_at	Rsn	-0.521259	0.0031127
1459747_at	---	-0.596435	0.00313437
1451897_a_at	Nbr1	-0.91973	0.0031397
1422547_at	Ranbp1	-0.607875	0.00314516
1443762_s_at	Sbf2	0.292683	0.00315261
1440237_at	Ercc4	-0.283953	0.00315527
1426625_at	Zfp623	-0.265917	0.00315722
1425369_a_at	Sox10	-0.631208	0.00316102
1419756_at	Dgkg	-0.616277	0.00316102
1454011_a_at	Rpa2	-0.613582	0.00316102
1420391_at	Pard3	-0.452883	0.00316102
1436539_at	Clmn	-0.982946	0.00316102
1456080_a_at	Serinc3	-1.25886	0.00318048
1421606_a_at	Sult4a1	-1.18145	0.00318048
1428882_at	Wipi2	-0.659136	0.00318424
1424214_at	9130213B05Rik	-0.257104	0.00318608
1451743_at	D19Wsu162e	-0.785044	0.00318699
1460118_at	---	-0.850498	0.0031972
1418533_s_at	Fzd2	-0.235394	0.00320292
1456473_x_at	Arf2	-0.970117	0.00320323
1451250_at	Gprin1	-0.578522	0.00321121
1438264_a_at	Tpp2	-1.11307	0.00321121
1428717_at	Scrn1	-0.699264	0.00321173
1432478_a_at	Ibrdc3	-0.722597	0.00321532
1437868_at	BC023892	-0.355365	0.00321532
1445676_at	---	0.346103	0.00321532
1425656_a_at	Baiap2	-0.486746	0.00323898
1456620_at	Gnptab	-0.421141	0.0032442
1430436_at	3321401G04Rik	0.823443	0.0032443
1429311_at	Ube2q1	-0.416436	0.0032541
1425522_at	2600011C06Rik	-0.918359	0.0032541
1452103_at	2600005N12Rik	-0.501166	0.0032541
1455695_at	St8sia1	0.891347	0.00325654
1423724_at	Zwint	-0.398368	0.00327362
1460235_at	Scarb2	-0.360764	0.00327926
1459843_s_at	Smad1	0.321368	0.00327926
1450247_a_at	Scamp5	-1.04809	0.00327926
1451302_at	1110012L19Rik	-0.468354	0.00328139
1416037_a_at	Cct2	-0.294147	0.00328862
1450243_a_at	Dscr1l1	-1.31284	0.0032993
1451676_at	Drap1	-0.264109	0.00330421
1450685_at	Arpp19	-0.511478	0.00331099
1451127_at	AW146242	-0.576202	0.00331099
1423394_at	Pcyox1	-0.331209	0.00332232
1455649_at	Ttc9	-0.655092	0.00333464
1436277_at	Rnf207	1.13678	0.00335019
1428818_at	Mon2	-0.524136	0.00335642
1452170_at	2010209O12Rik	-0.276129	0.00336079
1459793_s_at	---	-0.376193	0.00336079
1455804_x_at	Oxct1	0.641264	0.00336079
1457046_s_at	C77370	0.680108	0.00339621
1431036_a_at	Tmed2	-0.392202	0.00339621
1419189_at	Vti1a	-0.252834	0.00339621
1418746_at	Pnkd	-0.285483	0.00340082
1425390_at	Adat1	-0.481585	0.00342238
1428771_at	2410127E18Rik	-1.37475	0.00342238
1436633_at	LOC667668	-0.480171	0.00342238
1441064_at	E330039K12Rik	-1.00067	0.00342262
1417033_at	Ube2g2	-0.80784	0.00342396
1449041_a_at	Trip6	0.418893	0.00342396
1426599_a_at	Slc2a1	0.489254	0.00342396
1424215_at	Fundc1	-0.337836	0.00342526
1440709_at	C130081A10Rik	-0.438267	0.00342641
1444477_at	Ctnna3	-0.555085	0.00344475
1438672_at	Parvb	-0.296458	0.00344475
1421280_at	Gabra1	-1.38656	0.00344491
1460164_at	Spin	-1.30657	0.00344491
1416973_at	Nhp2l1	-0.518757	0.00344575
1416893_at	3110001A13Rik	-1.4684	0.00344851
1452057_at	Actr1b	-0.5365	0.00345606
1451350_a_at	Leprot	-0.472247	0.00345606
1424484_at	Mobk1b	-0.897592	0.00346576
1438447_at	Ddx11	0.380389	0.00346576
1452484_at	Car7	-0.71319	0.00346576
1420472_at	Mtpn	-1.84389	0.00346576
1450451_at	Spock2	-0.963616	0.00346576
1421204_a_at	Nudt16	-0.217373	0.00346642
1460717_at	Tspyl1	-1.33749	0.00346795
1452922_at	Ppp1r3d	-0.266102	0.00347881
1436244_a_at	Tle2	0.378269	0.00347881
1451634_at	2810051F02Rik	0.493955	0.00347881
1445202_at	---	-0.532275	0.00347892
1421238_a_at	Ptprt	-0.641779	0.00347892
1418290_a_at	Ezh1	-0.837476	0.00347892
1455857_a_at	Rab2b	-1.02227	0.00347892
1439115_at	Mcph1	0.364446	0.00347892
1455228_at	Whsc1	-0.343761	0.00348246
1425666_at	LOC624168	-1.2026	0.00348282
1432920_at	5330421C15Rik	-0.787228	0.0034854
1456755_at	Trak1	-0.569744	0.0034854
1435394_s_at	Rhoc	0.354764	0.00348739
1436010_at	BC036313	0.343747	0.00348975
1450457_at	Cbl	-1.07048	0.00348975
1421095_a_at	Trpc1	-1.20596	0.00350168
1450762_s_at	Zfp191	-0.845152	0.00350275
1421876_at	Mapk9	-1.32016	0.00350275
1446434_at	Galnact2	0.416145	0.00350275
1437545_at	Rcor1	0.255231	0.00351642
1423599_a_at	Pdcl	-0.500205	0.00351642
1423924_s_at	Tspan14	-0.39125	0.00351716
1459639_at	Brsk2	-1.29892	0.00351992
1421816_at	LOC630729	-0.9516	0.00352259
1434826_at	Rfesd	-0.565294	0.00353668
1437652_at	Sema6c	0.684346	0.00353866
1437102_at	Ythdf1	-0.562642	0.00353905
1448525_a_at	Bnip3l	-0.563531	0.00354019
1438638_x_at	1700027J05Rik	0.50804	0.00354257
1416475_at	Ube2d2	-0.886248	0.00354257
1434448_at	Txlna	-0.601839	0.00354257
1416247_at	Dctn3	-0.401917	0.00355586
1450034_at	Stat1	-0.406313	0.00355586
1453063_at	Cltb	-0.276404	0.00355739
1455558_at	Gm114	-0.393092	0.00355817
1422885_at	Snrpd3	-0.377978	0.00355817
1439554_at	Scmh1	0.555063	0.00356468
1419224_at	Cecr6	-0.426034	0.00357306
1416167_at	Prdx4	-0.300421	0.00357306
1434766_at	---	-0.403087	0.00357306
1427241_at	Papolg	-0.353319	0.0035948
1432504_at	1700106N22Rik	-0.376412	0.0035948
1428719_at	2010309G21Rik /// LOC207685	0.912323	0.00359933
1417164_at	Dusp10	-0.860927	0.00359965
1460337_at	Sh3kbp1	-0.454583	0.00361912
1445480_at	Gpr19	-0.695293	0.00362505
1418177_at	Gabrg2	-0.934059	0.0036305
1434064_at	Tmem142c	-0.65782	0.00363167
1428532_at	Ints7	-0.454064	0.00364031
1436229_at	BC049806	-0.582271	0.00366217
1425659_at	Tom1l2	-0.956285	0.00366714
1416627_at	Spint1	0.595587	0.00367009
1449325_at	Fads2	-0.945474	0.00367009
1418212_at	Omg	-0.434377	0.00367281
1426444_at	Rhbdd2	-0.528057	0.00368491
1445706_x_at	---	0.346398	0.00368825
1453260_a_at	Ppp2r2a	-0.465616	0.00368825
1448183_a_at	Hif1a	-1.57506	0.00370324
1423596_at	Nek6 /// LOC674247	-0.651577	0.00370732
1417820_at	Tor1b	0.35113	0.00370732
1435894_at	C030014L02	-0.207664	0.00370732
1451346_at	Mtap	-0.528089	0.00372029
1433633_at	Irf2bp2 /// LOC672960	-0.505029	0.00372568
1457118_at	Shc4	-0.252486	0.00373009
1457689_at	Sbf2	0.473496	0.00373013
1424655_at	Acp2	-0.705123	0.00377694
1419372_at	Gosr2	-0.827326	0.00377694
1452332_at	Ccdc85a	-0.255867	0.00377713
1426612_at	Tipin	-0.345344	0.00377812
1450486_a_at	Oprl1	-0.826604	0.00377976
1415900_a_at	Kit	-1.00784	0.00379132
1449408_at	Jam2	-0.565949	0.00379388
1457632_s_at	Mrg1	-0.373988	0.00379813
1450905_at	Plxnc1	-0.792866	0.00379813
1438108_at	9430067K14Rik	-0.687977	0.00379813
1446480_at	D8Ertd82e	0.824183	0.00379813
1444164_at	Fkbp3	-0.40229	0.00380006
1418932_at	Nfil3	-0.337363	0.00380006
1438706_at	6430517E21Rik	-0.712568	0.00380479
1434181_at	Plekhc1	-0.495935	0.00380705
1436953_at	Wipf1	-0.395656	0.00380918
1431385_a_at	Mbtps1	-1.47479	0.00381341
1438801_at	Dnm3	-1.23271	0.00383844
1423660_at	Ctdsp2	-0.760895	0.00384127
1429651_at	Phactr3	-0.316672	0.00384127
1427376_a_at	Map4k5	-0.719833	0.00384127
1418299_at	Dpysl4	-0.354034	0.00384311
1432269_a_at	Sh3kbp1	-0.605045	0.00384648
1418493_a_at	Snca	-0.565648	0.00386658
1453137_at	Fbxo30	-0.368919	0.00387169
1415829_at	Lbr	0.2581	0.00387229
1458665_at	---	0.577241	0.00387812
1431015_at	Tmem129	-0.711507	0.00388158
1421834_at	Pip5k1a	-0.537578	0.00388176
1416701_at	Rnd3	-0.513717	0.00388344
1426051_a_at	Cenpb	-0.437564	0.00390731
1417176_at	Csnk1e	-0.414235	0.00390731
1438087_at	Tpmt	0.379592	0.00392595
1427279_at	---	-0.490906	0.00392911
1443781_at	---	-1.2529	0.00393793
1456783_at	9330107J05Rik	0.67789	0.00394448
1455297_at	Spin2	-0.499372	0.00396865
1420954_a_at	Add1	-0.995891	0.00398454
1418073_at	Acot9	-0.459466	0.00398788
1454931_at	Eid2	-0.253989	0.00401315
1415860_at	Kpna2 /// LOC670551 /// LOC671639	-0.323328	0.00402798
1427097_at	Wwp1	-0.600669	0.00403086
1448843_at	LOC636537	-0.809874	0.00403536
1421018_at	1110018J18Rik	-0.747129	0.0040454
1416702_at	Serpini1	-1.15423	0.00405063
1425330_a_at	Ppm1b	-1.11629	0.0040508
1422508_at	Atp6v1a	-0.459009	0.00405289
1437622_x_at	Mrpl28	0.321434	0.00405984
1443148_at	Hip2	0.52281	0.00405984
1438009_at	MGC73635	-0.859243	0.00405984
1426361_at	Zc3h11a	0.238049	0.00405984
1427410_at	Dleu2	-0.363563	0.00406466
1451631_at	BC021395	-1.43299	0.00407907
1426235_a_at	Glul	-0.295566	0.00408354
1432418_a_at	Ckmt1	-0.625414	0.00409678
1455774_at	Jund1	-0.309556	0.00410028
1429508_at	2310057M21Rik	-0.283482	0.00410147
1430219_at	Fts	0.273226	0.00410949
1437045_at	Mapk8	0.261707	0.00411022
1439147_at	1110049B09Rik	0.779185	0.00411286
1434150_a_at	Mettl7a /// Ubie	0.364495	0.00411519
1450846_at	Bzw1	-1.6098	0.00411519
1453731_a_at	Tmem77	-0.432019	0.00412062
1449552_at	Zfr	-0.565372	0.0041246
1451347_at	Ccdc95	-0.726162	0.0041246
1453327_at	Krt24	0.576818	0.0041246
1453605_s_at	Ccdc91	-0.817932	0.00415326
1416986_a_at	Sirpa	-1.50515	0.0041915
1434398_at	Nkrf	-0.221397	0.00419993
1456531_x_at	Prpf19	0.409269	0.00420282
1456592_at	Vps13a	-0.701473	0.00421189
1432555_at	Whrn	0.416618	0.00422734
1448060_at	Sema6d	-1.40105	0.00422734
1417343_at	Fxyd6	-0.782734	0.00423256
1452476_at	Cacnb2	-1.21591	0.00423417
1437254_at	Cep76	-0.797719	0.00423946
1421832_at	Twsg1	-1.20376	0.0042418
1420583_a_at	Rora	-0.772533	0.00424779
1450942_at	Ccdc16	-0.408999	0.00425168
1421396_at	Pcsk1	-0.773705	0.00425868
1426434_at	Tmem43	-0.445318	0.0042607
1430152_at	Eps15	-0.421807	0.0042668
1420745_a_at	Ccndbp1	-0.455878	0.00427045
1417203_at	Ethe1	-0.518059	0.00427257
1435432_at	Centg2	-0.557909	0.0042964
1421100_a_at	Dab1	-0.81236	0.00430124
1444285_at	Morf4l1	-0.531119	0.00430422
1429106_at	4921509J17Rik	-0.355745	0.00430422
1425763_x_at	Igh-VJ558 /// LOC544903 /// LOC544907 /// LOC633774 /// LOC676478 /// LOC677563	1.56686	0.00430422
1444764_at	A130022J21Rik	-0.433553	0.00431303
1457040_at	Lgi2	-0.452724	0.0043147
1456108_x_at	Zfp179	0.641405	0.0043147
1444058_at	2310047C04Rik	-0.640074	0.00432235
1436917_s_at	Gpsm1	0.564914	0.004331
1449244_at	Cdh2	-0.387893	0.004331
1450006_at	Ncoa4 /// EG627557	-1.06218	0.00433344
1438557_x_at	Dnpep	0.377883	0.0043455
1452036_a_at	Tmpo	-0.288972	0.00436152
1430533_a_at	Ctnnb1	-1.04726	0.00436215
1447923_at	2810013C04Rik	0.227315	0.00436592
1452947_at	Gprc5c	-0.37379	0.00436997
1437392_at	LOC433485	-0.460709	0.00437491
1442360_at	---	-0.706426	0.00438109
1436607_a_at	C330002I19Rik /// LOC633081	-0.849844	0.0044015
1420513_at	Efcab2	-0.556008	0.0044015
1421081_a_at	Banf1	-0.449554	0.00440229
1437137_at	6430550H21Rik	-1.15323	0.00441234
1422468_at	Ppt1	-0.770904	0.00442793
1450472_s_at	Smad3	-0.963638	0.00444858
1450399_at	Psen1	-0.565633	0.00444913
1435964_a_at	Taok3	0.55572	0.00445884
1424749_at	Wdfy1	-0.665158	0.00447742
1416190_a_at	Sec61a1	-0.755634	0.00447742
1443017_at	Cpeb2	-0.585158	0.00447752
1436790_a_at	Sox11	-0.559366	0.00447791
1422229_at	Dub2 /// Dub2a	0.819441	0.00450504
1419377_at	Med9	-0.357423	0.004545
1434794_at	Rhof	-0.621523	0.004545
1452417_x_at	Igk-C /// Igk-V28 /// 2010205A11Rik /// Igk-V8-16	2.51413	0.004545
1452228_at	Tbc1d23	-0.805026	0.004545
1424531_a_at	Tcea3	0.707923	0.0045477
1447448_s_at	Klf6	-0.374218	0.00454951
1443728_at	---	0.38383	0.00455311
1426572_at	Me2	-0.605988	0.00455422
1439042_at	Adcyap1r1	-1.41128	0.00455791
1424258_at	Polr2d	-0.367989	0.00456457
1427085_at	2810432D09Rik	-0.26828	0.00456832
1459320_at	---	-0.394942	0.00457739
1447881_x_at	---	-0.309229	0.00458918
1432416_a_at	Npm1	-0.511573	0.00460821
1451041_at	Rock2	-0.489256	0.00460888
1426888_at	Ehmt2	-0.76625	0.00460888
1420825_at	Letm1	-0.827906	0.00462028
1443986_at	Cdc73	-0.835465	0.00463294
1450183_a_at	Sh2b3	-0.691615	0.00463881
1425676_a_at	Elovl1	-0.478009	0.00464171
1452896_at	Gtl3	-0.508535	0.00464186
1454136_a_at	4921524J17Rik	-0.365381	0.00467337
1424222_s_at	Rad23b	-0.464181	0.00472635
1428123_at	2610528K11Rik	-1.23386	0.00473098
1444930_at	Rabep1	-0.409698	0.00473804
1452628_at	Bag5	-0.400323	0.00473804
1421789_s_at	Arf3	-1.98995	0.00473804
1426510_at	Sccpdh	-0.46908	0.00474844
1458133_at	---	-0.368954	0.00476406
1421064_at	Mpp5	-0.313618	0.00476406
1437437_x_at	Dnpep	0.342488	0.0047777
1453796_a_at	Ergic2	-0.500368	0.00477833
1451532_s_at	Steap1	0.66891	0.00478416
1433653_at	BC029169	0.235022	0.00478416
1416929_at	Rbm12	-0.522177	0.00479191
1449262_s_at	Lin7c	-1.84002	0.00480671
1452007_at	Sybl1	-0.817104	0.00480699
1424668_a_at	Cutl1	-0.676578	0.00481064
1421954_at	Crkl	-1.33878	0.00481064
1422822_at	Stard5	-0.805227	0.00481954
1456955_at	---	0.575429	0.00483419
1417289_at	Plekha2	-0.386093	0.00483419
1421771_a_at	Ipp	-0.481233	0.00483731
1449494_at	Rab3c	-0.605591	0.00483731
1433559_at	Slc45a4	-0.243302	0.00485595
1423481_at	Riok2	-0.435182	0.00485886
1460241_a_at	St3gal5	-0.476211	0.00486804
1460186_at	Tm9sf3	-0.991762	0.00487097
1454012_a_at	Parp6	-1.02431	0.00487097
1415828_a_at	D3Ucla1	-0.858869	0.00487263
1450310_at	Grid2ip	0.408648	0.00487754
1422985_at	Fzd1	-1.3953	0.00487754
1417747_at	Cplx1	-0.972463	0.00488964
1426585_s_at	Mapk1	-0.522075	0.00488964
1422879_at	Sypl	-0.877193	0.0049017
1428307_at	Zdhhc13	-0.379155	0.0049083
1433993_at	4931406P16Rik	-0.250475	0.00493164
1427190_at	2900057D21Rik	-0.272262	0.00493516
1459907_a_at	Whsc1l1	-0.86333	0.00493946
1451109_a_at	Nedd4	-1.01957	0.0049423
1431118_at	6720427H10Rik	-0.494936	0.0049423
1428897_at	2610029I01Rik	-0.409752	0.00495366
1424603_at	Sumf1	-0.377447	0.0049574
1460275_at	Gpr3	0.247369	0.0049574
1450921_at	Aptx	-0.349367	0.00495795
1421324_a_at	Akt2	-0.820859	0.00495795
1459985_at	Wdr61	-0.335985	0.00496825
1421051_s_at	Vps25	-0.476822	0.00497462
1423718_at	Ak3	-0.516425	0.00497462
1448206_at	Psma2	-0.260011	0.00497462
1425400_a_at	Cited4	-0.613074	0.00497462
1448682_at	Dynll1	-0.294984	0.00497618
1431962_a_at	Stambp	-0.552187	0.00497618
1452980_at	2810468N07Rik	-0.262836	0.00498168
1453860_s_at	Nr3c1	-0.932994	0.00498168
1423594_a_at	Ednrb	-0.925096	0.00498811
1454915_at	Rab3gap2	-0.28022	0.00498811
1419024_at	Ptp4a1	-0.720248	0.00499091
1436268_at	Ddn	0.660433	0.00502513
1438583_at	Ern1	0.557778	0.00502513
1431608_at	Als2	-0.665461	0.00503379
1422536_at	Tnni3	0.493677	0.00503937
1448033_at	Tatdn1	-0.61449	0.00504799
1453069_at	Pik3cb	-0.333206	0.00504799
1458509_at	Mre11a	-0.541405	0.00504799
1428013_at	6030458C11Rik	-0.389583	0.00505513
1432236_a_at	Suv39h1	-0.686671	0.00506384
1426356_at	6330578E17Rik	-0.631892	0.00506384
1443805_at	Dact3	-0.378587	0.00506384
1416573_at	Pofut2	-0.71043	0.00506384
1420920_a_at	Arf1	-0.688592	0.00506384
1455390_at	1500005P14Rik /// Alkbh6	-0.298137	0.00508371
1450130_at	Xpr1	-0.991757	0.00509342
1417188_s_at	Hip2	-0.600685	0.00512299
1450537_at	Mid2	-0.997965	0.00512775
1453135_at	Fndc5	-0.545075	0.00514258
1417780_at	Lass4	-0.27893	0.0051486
1443902_at	6430573F11Rik	-0.847157	0.00515338
1456675_at	AA536749	-1.30584	0.00516329
1425018_at	Mcts1	-0.349833	0.0051667
1424924_at	Sec63	-0.435658	0.00516922
1440355_at	Kctd12b	-0.480419	0.00516922
1451092_a_at	Rangap1	-0.415219	0.00519341
1434419_s_at	Tardbp	-0.709131	0.00522314
1436158_at	Eif4ebp2	-0.427026	0.00525141
1439655_at	Ube2d2	1.0237	0.00525748
1431026_at	Nat12	-0.661585	0.0052625
1437950_at	BC035537	-0.259364	0.0052625
1448879_at	Ube2l3	-0.687694	0.00526398
1424705_at	Rbmx2	-0.393332	0.00526512
1438217_at	A2bp1	-0.548561	0.00526661
1427077_a_at	Ap2b1	-1.34768	0.0052714
1424397_at	Dhx36	-0.526614	0.00527497
1416122_at	Ccnd2	-0.624808	0.00529152
1423158_at	Gnpnat1	-0.53844	0.0052923
1440734_at	Ttbk2	-1.40513	0.0052923
1453422_a_at	1110020G09Rik	-0.986325	0.00532561
1459308_at	Kcnn3	0.328962	0.00532622
1447996_at	AI848149	-1.14749	0.00532835
1429503_at	2900024C23Rik	-0.262633	0.00533021
1426617_a_at	Ttyh1	-0.834594	0.00533943
1416732_at	Top2b	-1.23329	0.00533974
1417398_at	Rras2	-0.68505	0.00533974
1453081_at	2410022M11Rik	-0.537169	0.00534386
1444341_at	8030451F13Rik	-0.785593	0.00534589
1445296_at	D7Ertd715e	-0.863705	0.00534983
1425037_at	Fgd4	-0.723805	0.00534987
1455658_at	Cggbp1	-1.20059	0.00535478
1436101_at	Rnf24	-0.440539	0.00535478
1453082_at	2310022L06Rik	-0.44398	0.00536563
1431885_a_at	Mus81	-0.453047	0.00536785
1439289_s_at	0710005I19Rik	-0.695308	0.00537446
1448317_at	Tmem128	-0.244819	0.00537446
1417792_at	Zfml	-0.552131	0.00537776
1453823_a_at	A930028L21Rik	-0.302286	0.00539676
1415854_at	Kitl	-1.74463	0.00539952
1435617_at	AI480743	-0.437659	0.00539966
1416499_a_at	Dctn6	0.290008	0.00539966
1446814_at	---	0.521918	0.00539972
1421569_at	Grid1	-0.405489	0.00540562
1458422_at	D730002M21Rik	0.38096	0.00540562
1453419_at	2900078C09Rik	-0.365709	0.00540562
1427090_at	Zbed4	-0.382412	0.00540562
1450728_at	Fjx1	-0.389868	0.00540706
1418899_at	Ufm1	-0.378103	0.00541528
1436308_at	Zfp292	-0.447391	0.00543751
1423167_at	Prei3	-0.467081	0.00543751
1455672_s_at	Cplx2	-0.276865	0.00543833
1423104_at	Irs1	-0.288527	0.00543903
1450153_at	Gopc	-0.949034	0.00544358
1420876_a_at	6-Sep	-0.909745	0.00544398
1425460_at	Mtmr2	-0.292592	0.0054511
1430536_a_at	Erh	-0.402054	0.0054511
1452886_at	---	-1.01244	0.00547067
1423685_at	Aars	-0.458225	0.00547389
1416393_at	Emg1	-0.300641	0.00549055
1437005_a_at	Rpl18	-0.19633	0.00549881
1448844_at	Cyb5b	-1.43943	0.00550349
1453712_a_at	Map2k5	-0.98686	0.00550382
1423966_at	Cd99l2	-0.744891	0.00551073
1429475_at	2810457I06Rik	-0.347437	0.00551936
1437742_at	Rab21	-0.324156	0.00552877
1428233_at	Cpsf6	-0.406734	0.00553601
1421790_a_at	Kcnab3	-0.757236	0.00553601
1428204_at	C030002O17Rik	-0.185892	0.00553601
1428488_at	Pigk	-0.220626	0.00555045
1436706_at	Tmem32	-0.857296	0.00555669
1452137_at	Acbd3	-1.11387	0.00555669
1448334_a_at	Ccni	0.422255	0.00556948
1451680_at	Srxn1	-0.653195	0.00557465
1452290_at	Tmem106b	-1.38018	0.00557792
1423283_at	Pitpna	-0.499153	0.00557829
1454927_at	Zfp41	-0.400408	0.00558174
1428966_at	2610204K14Rik	-0.587229	0.00558174
1425638_at	Centa2	0.65348	0.00558174
1418248_at	Gla	-0.716633	0.00558957
1446934_at	---	-0.748471	0.00559997
1420506_a_at	Stxbp1	-1.59894	0.00560664
1415907_at	Ccnd3	-0.21682	0.00560684
1437354_at	C230091D08Rik	-0.802805	0.005622
1416503_at	Lxn	-0.435209	0.0056251
1447723_at	---	0.462043	0.0056251
1418700_at	Lias	-0.180428	0.0056348
1426346_at	Prepl	-0.955119	0.0056348
1431655_a_at	Mulk	-1.01151	0.00563746
1426416_a_at	Yipf4	-0.746306	0.00563746
1446804_at	Nxn	0.501596	0.00565573
1427578_a_at	Itgb4bp	-0.311004	0.00565812
1446386_at	Tcf4	0.261777	0.00565812
1423125_at	Dcamkl1	-1.50056	0.00565812
1425301_at	Ncam2	-0.517526	0.00567237
1423187_at	Gabarapl2	-0.548687	0.00568613
1439606_at	---	-0.298506	0.00570304
1426436_at	Tmem159	-0.581239	0.00571066
1453372_at	Dnajc1	-0.438488	0.00571428
1434830_at	Mxd1	0.185092	0.00571454
1417077_at	Bcap29	-0.397196	0.00571489
1445725_at	---	-0.419343	0.00573294
1426495_at	2410042D21Rik	-0.74275	0.00573532
1454669_at	Tmem11	-0.385073	0.00573699
1449214_a_at	Opa1	-1.58073	0.00573856
1421922_at	Sh3bp5	-0.532356	0.00573856
1433506_at	Lrrc8d	-0.506705	0.00573856
1440851_at	4933407N01Rik	0.424891	0.00574632
1421336_at	Prox1	-1.29988	0.00574632
1431003_a_at	2610002J02Rik	-0.260717	0.00575426
1431405_a_at	4930413O22Rik	0.343718	0.00577393
1418966_a_at	Dcbld1	-0.676512	0.00577393
1447589_at	Ppp4r1	0.634048	0.00577412
1420158_s_at	Abcf1	0.741257	0.00578069
1431379_a_at	Slc13a1	-0.796597	0.00579252
1437969_s_at	0610007P22Rik	-0.362541	0.00579386
1421653_a_at	Igh-VJ558 /// LOC544903 /// LOC544907 /// LOC633774 /// LOC676478 /// LOC677563	1.57409	0.00579716
1434016_at	Znrf2	-0.476071	0.00579883
1415823_at	Scd2	-1.25367	0.00580622
1451449_at	4933407N01Rik	-0.342505	0.0058317
1422793_at	Pafah1b2	-1.24168	0.00586714
1415930_a_at	Map1lc3b	-0.693619	0.00587943
1425796_a_at	Fgfr3	-0.722471	0.00589109
1417142_at	4932442K08Rik	-0.351674	0.00589247
1451525_at	Arhgap12	-0.278741	0.00590486
1420918_at	Sgk3	-0.666333	0.00590486
1426184_a_at	Pdcd6ip	-1.2242	0.00590486
1454765_at	Gtf3c3	-0.419564	0.00591268
1427152_at	Qser1	-0.380421	0.00591268
1428545_at	0610007L01Rik	-0.534728	0.0059172
1460702_at	Triap1	-0.459766	0.0059256
1454280_at	4931406H21Rik	-1.15259	0.00592701
1423129_at	Shoc2	-0.240493	0.00593347
1422167_at	Sema5a	-1.22985	0.00593347
1422577_at	Cs	-0.808177	0.00593347
1425929_a_at	Rnf14	-0.851843	0.00594102
1435832_at	Lrrc4	-0.343549	0.00595479
1457875_at	Hcfc1	0.407859	0.00595479
1428463_a_at	Ppp2r5e	0.259776	0.00595479
1435325_at	Usp46	-0.580167	0.00595838
1416640_at	Kcne1l	-0.512175	0.00596065
1426699_at	AU040320	-0.475596	0.00596216
1457425_at	C130038G02Rik	-0.481165	0.00596216
1424014_at	2900092E17Rik	0.345428	0.00596216
1421881_a_at	Elavl2	-0.487821	0.00596258
1419243_at	Rab14	-0.674193	0.00596258
1422501_s_at	Idh3a	-0.327966	0.00596451
1418075_at	St6galnac4	-0.387561	0.00597216
1450320_at	4931432E15Rik	0.620113	0.00597216
1425428_at	Hif3a	0.443398	0.00598186
1427510_at	Gnai1	-0.709575	0.00599552
1420629_a_at	Dnaja3	-1.04578	0.00599855
1428129_at	Lman1	-1.07159	0.00599855
1452933_at	Ankrd39	-0.492682	0.00602236
1460387_a_at	Siae	-0.515614	0.00602392
1427908_at	Bnip1	-0.388016	0.00602711
1435320_at	Ctdspl2	-0.540217	0.00603671
1434034_at	Cerk	-0.315044	0.00603738
1440901_at	Dgkb	-0.989207	0.00603802
1422954_at	Zfp60	-0.87619	0.00604957
1451241_at	Lamb1-1	-0.377384	0.00604957
1439550_at	---	0.456381	0.00606363
1426809_at	C430004E15Rik	-0.411952	0.00606363
1416125_at	Fkbp5	0.595197	0.00606363
1420867_at	Tmed2	-1.2679	0.00606363
1436192_at	Arfgef2 /// LOC670796	-0.332813	0.00610563
1424732_s_at	3110005G23Rik	-0.547698	0.00613177
1415788_at	Ublcp1	-0.347399	0.00614502
1460360_at	Asrgl1	-0.489853	0.00615871
1420862_at	Dctn4	-0.611214	0.0061682
1429079_a_at	2310045N01Rik	-0.335278	0.00619164
1416343_a_at	Lamp2	-0.565096	0.00620279
1442099_at	Usp31	-0.969244	0.00620406
1451245_at	Lrrc3b	-0.469258	0.00622382
1455183_at	Stk38l	-0.332951	0.00622463
1423549_at	Slc1a4	-0.39518	0.00622775
1452271_at	Xpr1	-0.444118	0.0062279
1424659_at	Slit2	0.497838	0.0062279
1419744_at	H2-DMb2	0.509699	0.00624305
1450779_at	Fabp7	-0.400071	0.00624305
1427412_s_at	Rapgef6	-0.689903	0.00624305
1451400_at	Gemin8	-0.427245	0.00624954
1428048_at	BC027582	-0.48058	0.00625689
1430700_a_at	Pla2g7	-0.558094	0.00625814
1431507_a_at	Synj2bp /// 1810020G14Rik	-0.440118	0.00625814
1425899_a_at	Itsn1	-0.708999	0.00626538
1423675_at	Usp1	-0.898058	0.00627415
1430944_at	A930030B08Rik	0.525312	0.00630021
1426837_at	Metap1	-0.551205	0.0063139
1424870_at	Osbpl10	-0.326041	0.00631484
1421189_at	Gabrb3	-1.69838	0.00633668
1430889_a_at	Tpmt	-0.748493	0.00633668
1448918_at	Slco3a1	-0.300774	0.00634356
1427163_at	Ubr2	-0.810956	0.00635168
1428738_a_at	D14Ertd449e	-0.44051	0.00635377
1457178_at	Rabgap1l	0.198421	0.00635496
1423588_at	Arpc4	-0.939809	0.00636531
1449010_at	Hspa4l	-0.346623	0.00639965
1435271_at	Irf3	0.330823	0.00640553
1436796_at	1110061A14Rik	-0.268452	0.00643084
1451927_a_at	Mapk14	-0.874883	0.00643404
1450910_at	Cap2	-0.333615	0.00645854
1428210_s_at	Chuk	0.337498	0.00645854
1418922_at	Igsf4b	-0.699885	0.00647401
1457093_at	Gapvd1	0.213218	0.00648849
1421846_at	Wsb2	-0.622233	0.00649982
1424946_a_at	Mtfr1	-0.569167	0.00650543
1422300_at	Nog	-1.1004	0.00653717
1449137_at	Pdha1	-0.948458	0.00653717
1449275_at	2310038H17Rik	-0.683426	0.00653717
1449376_at	Nicn1	-0.431396	0.00653717
1418828_at	Thex1	-0.492072	0.00654553
1424247_at	Erc1	-0.297375	0.00654703
1451667_at	C530043G21Rik	-1.49387	0.00657016
1441142_at	2700081L22Rik	-0.631092	0.00658332
1422145_at	Mgat3	-1.53481	0.006586
1442791_x_at	6720407P12Rik	0.990571	0.00659291
1460191_at	Ykt6	-0.946362	0.00662318
1452663_at	Svop	-0.476784	0.0066241
1449968_s_at	Acot9 /// Acot10	-0.352942	0.0066241
1451018_at	Leprotl1	-0.55529	0.00662878
1430090_at	Ccdc28b	0.28245	0.00663269
1453106_a_at	Rnmt	-0.356522	0.006642
1433476_at	C78339	-0.36952	0.00665017
1419935_s_at	Csnk2a2	-0.530338	0.00666766
1415674_a_at	Trappc4	-0.44334	0.00666866
1435246_at	Paqr8	-0.687308	0.00666866
1451981_at	Gtrgeo22	-0.521497	0.00666866
1450074_at	Kif3b	-0.673929	0.00667435
1422673_at	Prkcm	-0.312898	0.00668734
1429552_at	Wdr16	0.6304	0.00670558
1454725_at	Tra2a	0.626117	0.00670861
1421181_at	Nptxr /// Npcd	-0.951385	0.00670861
1451619_at	Golph3l	-0.830095	0.00674576
1457834_at	Yy1	-0.977406	0.00674603
1450708_at	Scg2	-0.468436	0.00676706
1450116_at	D3Ertd300e	-1.00533	0.00678695
1460353_at	Tmem48	-0.758527	0.00680219
1429564_at	Pcgf5	-0.32266	0.00680219
1426329_s_at	Baalc	-0.823382	0.00680219
1451398_at	Cbr4	-0.462623	0.00682373
1427730_a_at	Zfp148	-0.666305	0.00684652
1415789_a_at	Ublcp1 /// LOC665689	-0.33389	0.0068627
1442535_at	Zfp609	-0.38997	0.00686702
1430437_a_at	1300018I17Rik	-0.564196	0.00686709
1451190_a_at	Sbk1	0.618351	0.00686709
1439214_a_at	Api5	-1.08155	0.00686764
1452226_at	Rcc2	-0.52086	0.00686884
1434506_at	Arid2	-0.2967	0.00686884
1458428_at	Kcnt1	0.377453	0.00689084
1430440_at	4930442J19Rik	0.742795	0.0068974
1449100_at	Pard6a	-0.421648	0.00692265
1455912_x_at	Unc45a	0.647046	0.00693036
1432211_a_at	Fbxo9	-0.593403	0.00693036
1419748_at	Abcd2	-0.927196	0.00693393
1417063_at	C1qb	-0.479635	0.00694384
1455803_at	Slco4a1	0.362179	0.00695076
1423048_a_at	Tollip	-1.44929	0.00695382
1455082_at	Cblb	-0.291462	0.00697543
1422791_at	Pafah1b2	-1.04221	0.00698512
1447204_at	Map4k5	0.486161	0.00698662
1421083_x_at	Banf1	-0.456733	0.00699789
1450713_at	Cspg5	-0.586137	0.0070035
1447745_at	Aqp4	-1.3318	0.00700925
1419656_at	Slc25a36	-0.650542	0.00703844
1418010_a_at	Sh3glb1	-0.195962	0.0070474
1447221_x_at	Fgf14	0.605795	0.00704802
1426842_at	Ythdf3	-0.56368	0.0070751
1437733_at	Eif4ebp2	-0.45383	0.00708967
1456632_at	Bcl11a	-0.351472	0.00709226
1428275_at	Abhd13	-0.684819	0.00709527
1421193_a_at	Pbx3	-0.351664	0.00712626
1434790_a_at	Lta4h	-0.425348	0.00715009
1435033_at	Arhgef4	-0.198802	0.00715753
1433300_at	2900005I04Rik	0.391692	0.00715867
1444505_at	Zmiz1	-1.04398	0.00715867
1449618_s_at	2900092E17Rik	0.350053	0.0071697
1425942_a_at	Gpm6b	-0.586655	0.00718453
1418067_at	Cfl2	-0.195451	0.00722586
1428888_at	Tmem33	-1.47261	0.00725147
1425339_at	Plcb4	-0.684846	0.00728376
1422341_s_at	Lypla3	-1.03906	0.00728376
1451583_a_at	BC025076	-0.535613	0.00729026
1429538_a_at	5730406M06Rik	-0.629539	0.00729681
1427146_at	AI790298	0.171269	0.00729757
1438771_at	Brd1	0.344259	0.00730239
1458895_at	C80008	0.598385	0.00730239
1423958_a_at	Ttc33	-0.19973	0.00730265
1452132_at	Tlcd1	-0.290816	0.00730265
1456664_x_at	Hnrpf /// LOC637008 /// LOC665008 /// LOC672616	0.28968	0.00730545
1429432_at	Bat2d	0.768377	0.00730545
1442169_at	Vldlr	-0.644452	0.00731456
1427319_at	A230046K03Rik	-0.377709	0.00736416
1431068_at	Rmnd5a	-1.9057	0.0073814
1421568_at	Kcna6	-1.38267	0.00739111
[truncated: 1,603 more rows]
