# Supplementary material for: Progression of pathology in PINK1-deficient mouse brain from splicing via ubiquitination, ER stress, and mitophagy changes to neuroinflammation
Source: J Neuroinflammation. 2017 Aug 2;14:154. doi: 10.1186/s12974-017-0928-0 (PMC5541666; doi:10.1186/s12974-017-0928-0)
Supplement: Supplementary file 3 — STRING bioinformatics assessment of all significant changes, including subtle effects. Ranked list of the significant transcript expression changes in PINK1-deficient mouse cerebellar tissue at ages 6 weeks, 6 months, and 18 months, which were used as input for the STRING analysis (A). Significant functional enrichments in the protein-protein-interaction network according to the STRING database is shown regarding GO Cellular component at 6 weeks with all factors of AdjPvalue <0.05 (B), 6 months with all factors of AdjPvalue <0.05 (C), and 18 months with all factors of AdjPvalue <0.01, with the term “intracellular membrane-bounded organelle” being prominent at all 3 ages (D). Prominent enrichments were highlighted in yellow color. In GO Molecular Process at 18 months with all factors of AdjPvalue <0.01 the relevance of stimulus- and stress-dependent pathways is apparent, e.g., endoplasmic reticulum stress, and a significant enrichment of mitophagy factors appears here in lines 495 and 518 (E). Among KEGG pathways at 18 months with all factors of AdjPvalue <0.01, the highest ranked pathways include “MAPK signaling”, “Ubiquitin-mediated proteolysis”, “Protein processing in endoplasmic reticulum” and “Bacterial invasion of epithelial cells” (F). Orange color was used to highlight some MAPK-dependent synaptic signaling pathways with significant enrichment, purple color was used for ubiquitination and protein processing pathways, green color was used for neuroinflammation pathways. (ZIP 366 kb) [file 12974_2017_928_MOESM3_ESM.zip › TorresAuburger-SupplTableS2B.xls]

## Sheet: Pink1KOcbll6wk-GOcellComponent
#pathway ID	pathway description	observed gene count	false discovery rate	matching proteins in your network (IDs)	matching proteins in your network (labels)
GO.0043229	intracellular organelle	172	3.59e-09	ENSMUSP00000000641,ENSMUSP00000000642,ENSMUSP00000001185,ENSMUSP00000001187,ENSMUSP00000001547,ENSMUSP00000002395,ENSMUSP00000003502,ENSMUSP00000003575,ENSMUSP00000003640,ENSMUSP00000004560,ENSMUSP00000005620,ENSMUSP00000011981,ENSMUSP00000012104,ENSMUSP00000014698,ENSMUSP00000017435,ENSMUSP00000019721,ENSMUSP00000020270,ENSMUSP00000020308,ENSMUSP00000020350,ENSMUSP00000020681,ENSMUSP00000020702,…	Acpl2,Actb,Ak3,Alas2,Aldh2,Alkbh8,Alms1,Ankrd33,Anp32a,Anxa4,Atg13,Atp2a2,Bhlhe40,Bid,Birc6,Cbr3,Ccnd3,Ccnt1,Cct4,Cdkn2aip,Cebpz,Chd2,Cln8,Clta,Col1a1,Copz1,Cpsf6,Creb1,Creb3,Cryl1,Csda,Ddit4,Ddx11,Ddx50,Dguok,Dnaic1,Dnaic2,Dnaja1,Dnajb1,Efhc1,Elovl6,Emid1,Eomes,Epb4.9,Esco1,Exo5,Ext1,Extl1,Faap20,Fam210a,Fam65b,Fgf13,Fkbp6,Fosb,Foxp1,Gm2506,Gmcl1,Gnai2,Hbxip,Herpud1,Hk2,Hnrnpu,Hspa1a,Hspa5,Igfbp…
GO.0044446	intracellular organelle part	126	3.16e-08	ENSMUSP00000000642,ENSMUSP00000001185,ENSMUSP00000001187,ENSMUSP00000002395,ENSMUSP00000003502,ENSMUSP00000003575,ENSMUSP00000004560,ENSMUSP00000005620,ENSMUSP00000011981,ENSMUSP00000012104,ENSMUSP00000019721,ENSMUSP00000020270,ENSMUSP00000020350,ENSMUSP00000020681,ENSMUSP00000022517,ENSMUSP00000022595,ENSMUSP00000022629,ENSMUSP00000022694,ENSMUSP00000024879,ENSMUSP00000025142,ENSMUSP00000025696,…	Acpl2,Actb,Ak3,Alas2,Aldh2,Alkbh8,Alms1,Anp32a,Anxa4,Atp2a2,Bhlhe40,Bid,Birc6,Cbr3,Ccnt1,Cct4,Cdkn2aip,Chd2,Cln8,Clta,Copz1,Cpsf6,Creb1,Creb3,Cryl1,Ddx11,Ddx50,Dnaic1,Dnaic2,Dnajb1,Dpysl2,Efhc1,Elovl6,Epb4.9,Esco1,Exo5,Ext1,Extl1,Faap20,Fgf13,Fkbp6,Gmcl1,Gnai2,Gsn,Gtf2f2,Hbxip,Herpud1,Hk2,Hnrnpu,Hspa1a,Hspa5,Ilf3,Isy1,Jun,Kiaa1033,Kif17,Kif1b,Kif3a,Lgr5,Mgll,Mid1,Mid2,Mkks,Morf4l1,Mtmr2,Myo1c,Nel…
GO.0043231	intracellular membrane-bounded organelle	158	6.39e-08	ENSMUSP00000000641,ENSMUSP00000000642,ENSMUSP00000001185,ENSMUSP00000001187,ENSMUSP00000001547,ENSMUSP00000002395,ENSMUSP00000003502,ENSMUSP00000003640,ENSMUSP00000004560,ENSMUSP00000005620,ENSMUSP00000011981,ENSMUSP00000012104,ENSMUSP00000014698,ENSMUSP00000017435,ENSMUSP00000019721,ENSMUSP00000020270,ENSMUSP00000020308,ENSMUSP00000020350,ENSMUSP00000020681,ENSMUSP00000020702,ENSMUSP00000021413,…	Acpl2,Actb,Ak3,Alas2,Aldh2,Alkbh8,Ankrd33,Anp32a,Anxa4,Atg13,Atp2a2,Bhlhe40,Bid,Birc6,Cbr3,Ccnd3,Ccnt1,Cct4,Cdkn2aip,Cebpz,Chd2,Cln8,Clta,Col1a1,Copz1,Cpsf6,Creb1,Creb3,Cryl1,Csda,Ddit4,Ddx11,Ddx50,Dguok,Dnaja1,Dnajb1,Dpysl2,Elovl6,Emid1,Eomes,Epb4.9,Esco1,Exo5,Ext1,Extl1,Faap20,Fam210a,Fgf13,Fkbp6,Fosb,Foxp1,Gm2506,Gmcl1,Gnai2,Gsn,Hbxip,Herpud1,Hk2,Hnrnpu,Hspa1a,Hspa5,Igfbp3,Il33,Ilf3,Irak1bp1,I…
GO.0005622	intracellular	183	8.68e-08	ENSMUSP00000000641,ENSMUSP00000000642,ENSMUSP00000001185,ENSMUSP00000001187,ENSMUSP00000002395,ENSMUSP00000003575,ENSMUSP00000003640,ENSMUSP00000004560,ENSMUSP00000005620,ENSMUSP00000010804,ENSMUSP00000011981,ENSMUSP00000012104,ENSMUSP00000014698,ENSMUSP00000017435,ENSMUSP00000019721,ENSMUSP00000020270,ENSMUSP00000020308,ENSMUSP00000020350,ENSMUSP00000020551,ENSMUSP00000020630,ENSMUSP00000020681,…	Acpl2,Actb,Ak3,Alas2,Aldh2,Alkbh8,Alms1,Ankrd33,Anp32a,Anxa4,Asb3,Atg13,Bdh2,Bhlhe40,Bid,Birc6,Cbr3,Ccnd3,Ccnt1,Cct4,Cdkn2aip,Cebpz,Chd2,Cln8,Clta,Copz1,Cpsf6,Creb1,Creb3,Cryl1,Csda,Dclk1,Ddit4,Ddx11,Ddx50,Desi2,Dguok,Dnaic1,Dnaic2,Dnajb1,Dpysl4,Efhc1,Elovl6,Emid1,Eomes,Epb4.9,Esco1,Exo5,Exoc6b,Ext1,Extl1,Faap20,Fam210a,Fam65b,Fgf13,Fkbp6,Fosb,Foxp1,Gm2506,Gmcl1,Hba-a1,Hbxip,Herpud1,Hk2,Hnrnpu,Hs…
GO.0043226	organelle	177	8.68e-08	ENSMUSP00000000641,ENSMUSP00000000642,ENSMUSP00000001185,ENSMUSP00000001187,ENSMUSP00000001547,ENSMUSP00000002395,ENSMUSP00000003502,ENSMUSP00000003640,ENSMUSP00000004560,ENSMUSP00000005620,ENSMUSP00000010804,ENSMUSP00000011981,ENSMUSP00000012104,ENSMUSP00000014698,ENSMUSP00000015712,ENSMUSP00000017435,ENSMUSP00000019721,ENSMUSP00000020270,ENSMUSP00000020308,ENSMUSP00000020350,ENSMUSP00000020630,…	Acpl2,Actb,Ak3,Alas2,Aldh2,Alkbh8,Alms1,Ankrd33,Anp32a,Anxa4,Atg13,Bdh2,Bhlhe40,Bid,Birc6,Cbr3,Ccnd3,Ccnt1,Cct4,Cdkn2aip,Cebpz,Chd2,Cln8,Clta,Col1a1,Copz1,Cpsf6,Creb1,Creb3,Cryl1,Csda,Ddit4,Ddx11,Ddx50,Dguok,Dnaic1,Dnaic2,Dnajb1,Efhc1,Efna1,Elovl6,Emid1,Endod1,Eomes,Epb4.9,Esco1,Exo5,Ext1,Extl1,Faap20,Fam210a,Fam49b,Fam65b,Fgf13,Fkbp6,Fosb,Foxp1,Glo1,Gm2506,Gmcl1,Gnai2,Hbxip,Herpud1,Hk2,Hnrnpu,Hs…
GO.0044422	organelle part	126	8.68e-08	ENSMUSP00000000642,ENSMUSP00000001185,ENSMUSP00000001187,ENSMUSP00000002395,ENSMUSP00000003502,ENSMUSP00000003575,ENSMUSP00000004560,ENSMUSP00000005620,ENSMUSP00000011981,ENSMUSP00000012104,ENSMUSP00000019721,ENSMUSP00000020270,ENSMUSP00000020350,ENSMUSP00000020681,ENSMUSP00000022327,ENSMUSP00000022517,ENSMUSP00000022595,ENSMUSP00000022629,ENSMUSP00000022694,ENSMUSP00000024879,ENSMUSP00000025142,…	Acpl2,Actb,Ak3,Alas2,Aldh2,Alkbh8,Alms1,Anp32a,Anxa4,Bhlhe40,Bid,Birc6,Cbr3,Ccnt1,Cct4,Cdkn2aip,Chd2,Cln8,Clta,Copz1,Cpsf6,Creb1,Creb3,Cryl1,Ddx11,Ddx50,Dnaic1,Dnaic2,Dnajb1,Dpysl2,Efhc1,Elovl6,Epb4.9,Esco1,Exo5,Ext1,Extl1,Faap20,Fam65b,Fgf13,Fkbp6,Gmcl1,Gnai2,Gsn,Gtf2f2,Hbxip,Herpud1,Hk2,Hnrnpu,Hspa1a,Hspa5,Ilf3,Isy1,Jun,Kiaa1033,Kif17,Kif1b,Ldb3,Lgr5,Mgll,Mid1,Mid2,Mkks,Morf4l1,Mtmr2,Myo1c,Nelf…
GO.0044424	intracellular part	180	8.68e-08	ENSMUSP00000000641,ENSMUSP00000000642,ENSMUSP00000001185,ENSMUSP00000001187,ENSMUSP00000002395,ENSMUSP00000003575,ENSMUSP00000003640,ENSMUSP00000004560,ENSMUSP00000005620,ENSMUSP00000010804,ENSMUSP00000011981,ENSMUSP00000012104,ENSMUSP00000014698,ENSMUSP00000017435,ENSMUSP00000019721,ENSMUSP00000020270,ENSMUSP00000020308,ENSMUSP00000020350,ENSMUSP00000020630,ENSMUSP00000020681,ENSMUSP00000020702,…	Acpl2,Actb,Ak3,Alas2,Aldh2,Alkbh8,Alms1,Ankrd33,Anp32a,Anxa4,Atg13,Bdh2,Bhlhe40,Bid,Birc6,Cbr3,Ccnd3,Ccnt1,Cct4,Cdkn2aip,Cebpz,Chd2,Cln8,Clta,Copz1,Cpsf6,Creb1,Creb3,Cryl1,Csda,Ddit4,Ddx11,Ddx50,Desi2,Dguok,Dnaic1,Dnaic2,Dnajb1,Dpysl4,Efhc1,Elovl6,Emid1,Eomes,Epb4.9,Esco1,Exo5,Exoc6b,Ext1,Extl1,Faap20,Fam210a,Fam65b,Fgf13,Fkbp6,Fosb,Foxp1,Gm2506,Gmcl1,Hba-a1,Hbxip,Herpud1,Hk2,Hnrnpu,Hspa1a,Hspa1b…
GO.0044464	cell part	194	3.62e-07	ENSMUSP00000000641,ENSMUSP00000000642,ENSMUSP00000001185,ENSMUSP00000001187,ENSMUSP00000002395,ENSMUSP00000003575,ENSMUSP00000003640,ENSMUSP00000004560,ENSMUSP00000005620,ENSMUSP00000010804,ENSMUSP00000011981,ENSMUSP00000012104,ENSMUSP00000014698,ENSMUSP00000015712,ENSMUSP00000017435,ENSMUSP00000019721,ENSMUSP00000020270,ENSMUSP00000020308,ENSMUSP00000020350,ENSMUSP00000020551,ENSMUSP00000020630,…	Acpl2,Actb,Ak3,Alas2,Aldh2,Alkbh8,Alms1,Ankrd33,Anp32a,Anxa4,Arhgef39,Asb3,Atg13,Bai3,Bdh2,Bhlhe40,Bid,Birc6,Cbr3,Ccnd3,Ccnt1,Cct4,Cd72,Cdh7,Cdkn2aip,Cebpz,Chd2,Cln8,Clta,Copz1,Cpsf6,Creb1,Creb3,Cryl1,Csda,Ddit4,Ddx11,Ddx50,Desi2,Dguok,Dnaic1,Dnaic2,Dnajb1,Dpysl4,Efhc1,Efna1,Elovl6,Emid1,Eomes,Epb4.9,Esco1,Exo5,Exoc6b,Ext1,Extl1,Faap20,Fam210a,Fam49b,Fam65b,Fgf13,Fkbp6,Fosb,Foxp1,Fpr2,Fxyd7,Gm250…
GO.0005623	cell	194	4.38e-07	ENSMUSP00000000641,ENSMUSP00000000642,ENSMUSP00000001185,ENSMUSP00000001187,ENSMUSP00000002395,ENSMUSP00000003575,ENSMUSP00000003640,ENSMUSP00000004560,ENSMUSP00000005620,ENSMUSP00000010804,ENSMUSP00000011981,ENSMUSP00000012104,ENSMUSP00000014698,ENSMUSP00000015712,ENSMUSP00000017435,ENSMUSP00000019721,ENSMUSP00000020270,ENSMUSP00000020308,ENSMUSP00000020350,ENSMUSP00000020551,ENSMUSP00000020630,…	Acpl2,Actb,Ak3,Alas2,Aldh2,Alkbh8,Alms1,Ankrd33,Anp32a,Anxa4,Arhgef39,Asb3,Atg13,Bai3,Bdh2,Bhlhe40,Bid,Birc6,Cbr3,Ccnd3,Ccnt1,Cct4,Cd72,Cdh7,Cdkn2aip,Cebpz,Chd2,Cln8,Clta,Copz1,Cpsf6,Creb1,Creb3,Cryl1,Csda,Ddit4,Ddx11,Ddx50,Desi2,Dguok,Dnaic1,Dnaic2,Dnajb1,Dpysl4,Efhc1,Efna1,Elovl6,Emid1,Eomes,Epb4.9,Esco1,Exo5,Exoc6b,Ext1,Extl1,Faap20,Fam210a,Fam49b,Fam65b,Fgf13,Fkbp6,Fosb,Foxp1,Fpr2,Fxyd7,Gm250…
GO.0043227	membrane-bounded organelle	166	4.85e-07	ENSMUSP00000000641,ENSMUSP00000000642,ENSMUSP00000001185,ENSMUSP00000001187,ENSMUSP00000001547,ENSMUSP00000002395,ENSMUSP00000003502,ENSMUSP00000003575,ENSMUSP00000003640,ENSMUSP00000004560,ENSMUSP00000005620,ENSMUSP00000010804,ENSMUSP00000011981,ENSMUSP00000012104,ENSMUSP00000014698,ENSMUSP00000015712,ENSMUSP00000017435,ENSMUSP00000019721,ENSMUSP00000020270,ENSMUSP00000020308,ENSMUSP00000020350,…	Acpl2,Actb,Ak3,Alas2,Aldh2,Alkbh8,Ankrd33,Anp32a,Anxa4,Atg13,Bdh2,Bhlhe40,Bid,Birc6,Cbr3,Ccnd3,Ccnt1,Cct4,Cdkn2aip,Cebpz,Chd2,Cln8,Clta,Col1a1,Copz1,Cpsf6,Creb1,Creb3,Cryl1,Csda,Ddit4,Ddx11,Ddx50,Dguok,Dnajb1,Dpysl2,Efna1,Elovl6,Emid1,Endod1,Eomes,Epb4.9,Esco1,Exo5,Ext1,Extl1,Faap20,Fam210a,Fam49b,Fgf13,Fkbp6,Fosb,Foxp1,Glo1,Gm2506,Gmcl1,Gnai2,Hbxip,Herpud1,Hk2,Hnrnpu,Hspa1a,Hspa4,Hspa5,Igfbp3,Il…
GO.0044444	cytoplasmic part	116	4.96e-07	ENSMUSP00000000641,ENSMUSP00000000642,ENSMUSP00000001187,ENSMUSP00000001547,ENSMUSP00000003575,ENSMUSP00000004560,ENSMUSP00000005620,ENSMUSP00000010804,ENSMUSP00000014698,ENSMUSP00000019721,ENSMUSP00000020308,ENSMUSP00000020350,ENSMUSP00000020630,ENSMUSP00000021413,ENSMUSP00000021514,ENSMUSP00000022327,ENSMUSP00000022517,ENSMUSP00000022629,ENSMUSP00000022694,ENSMUSP00000023387,ENSMUSP00000024879,…	Acpl2,Actb,Ak3,Alas2,Aldh2,Alkbh8,Alms1,Ankrd33,Anp32a,Anxa4,Atg13,Bhlhe40,Bid,Birc6,Cbr3,Cct4,Cln8,Clta,Col1a1,Copz1,Creb1,Creb3,Cryl1,Ddit4,Dguok,Dnaic1,Dnaic2,Dnaja1,Dnajb1,Dpysl2,Efhc1,Elovl6,Emid1,Epb4.9,Exo5,Exoc6b,Ext1,Extl1,Fam210a,Fgf13,Fkbp6,Gnai2,Hba-a1,Hbxip,Herpud1,Hk2,Hnrnpu,Hspa1a,Hspa4,Hspa5,Il33,Ilf3,Jun,Kcnk3,Kiaa1033,Kif17,Kif1b,Ldb3,Lgr5,Lsm14a,Mapre1,Mgll,Mid1,Mkks,Mt1,Myo1c,…
GO.0005634	nucleus	110	7.43e-07	ENSMUSP00000001185,ENSMUSP00000001187,ENSMUSP00000002395,ENSMUSP00000003640,ENSMUSP00000005620,ENSMUSP00000011981,ENSMUSP00000012104,ENSMUSP00000014698,ENSMUSP00000017435,ENSMUSP00000020270,ENSMUSP00000020681,ENSMUSP00000020702,ENSMUSP00000021413,ENSMUSP00000021514,ENSMUSP00000022517,ENSMUSP00000022595,ENSMUSP00000024857,ENSMUSP00000024885,ENSMUSP00000025142,ENSMUSP00000025724,ENSMUSP00000026032,…	Actb,Alkbh8,Ankrd33,Anp32a,Anxa4,Bhlhe40,Cbr3,Ccnd3,Ccnt1,Cct4,Cdkn2aip,Cebpz,Chd2,Cpsf6,Creb1,Creb3,Cryl1,Csda,Ddx11,Ddx50,Dguok,Dnaja1,Dnajb1,Eomes,Esco1,Exo5,Faap20,Fgf13,Fkbp6,Fosb,Foxp1,Gm2506,Gmcl1,Gnai2,Gsn,Hnrnpu,Hspa1a,Igfbp3,Il33,Ilf3,Irak1bp1,Isy1,Jun,Kiaa1033,Klf15,Klf3,Lbh,Lpp,Mamstr,Mettl16,Mgll,Morf4l1,Mt1,Mtmr2,Myo1c,Nelf,Nfkbia,Nfu1,Nos1,Nrip2,Nsd1,Nudt16,Onecut2,Pcgf6,Phactr1,Ph…
GO.0043232	intracellular non-membrane-bounded organelle	74	1.68e-06	ENSMUSP00000002395,ENSMUSP00000003575,ENSMUSP00000005620,ENSMUSP00000020270,ENSMUSP00000022327,ENSMUSP00000022517,ENSMUSP00000022595,ENSMUSP00000022629,ENSMUSP00000022694,ENSMUSP00000024879,ENSMUSP00000025142,ENSMUSP00000025724,ENSMUSP00000028239,ENSMUSP00000028730,ENSMUSP00000030436,ENSMUSP00000030536,ENSMUSP00000030539,ENSMUSP00000030623,ENSMUSP00000031841,ENSMUSP00000032194,ENSMUSP00000033473,…	Actb,Alkbh8,Alms1,Bhlhe40,Birc6,Cct4,Cdkn2aip,Chd2,Creb1,Cryl1,Ddx11,Ddx50,Dnaic1,Dnaic2,Dnajb1,Dpysl2,Efhc1,Epb4.9,Esco1,Faap20,Fam65b,Fgf13,Fkbp6,Gnai2,Gsn,Gtf2f2,Hnrnpu,Il33,Ilf3,Jun,Kif17,Kif1b,Kif3a,Ldb3,Lsm14a,Mast2,Mid2,Mkks,Morf4l1,Myo1c,Nelf,Nos1,Nsd1,Nudt16,Onecut2,Pink1,Plekhh1,Pnrc2,Pole4,Ptk2,Rbm4,Rec8,Rfwd2,Rgcc,Ric8b,Rif1,Rock1,Rps20,Sccpdh,Sfpq,Sh3kbp1,Syne2,Taf1b,Taok2,Tcf12,Tia1…
GO.0005737	cytoplasm	150	4.14e-06	ENSMUSP00000000641,ENSMUSP00000000642,ENSMUSP00000001187,ENSMUSP00000003575,ENSMUSP00000004560,ENSMUSP00000005620,ENSMUSP00000010804,ENSMUSP00000011981,ENSMUSP00000014698,ENSMUSP00000017435,ENSMUSP00000019721,ENSMUSP00000020308,ENSMUSP00000020350,ENSMUSP00000020630,ENSMUSP00000020681,ENSMUSP00000021413,ENSMUSP00000021447,ENSMUSP00000021514,ENSMUSP00000022327,ENSMUSP00000022517,ENSMUSP00000022595,…	Acpl2,Actb,Ak3,Alas2,Aldh2,Alkbh8,Alms1,Ankrd33,Anp32a,Anxa4,Atg13,Bdh2,Bhlhe40,Bid,Birc6,Cbr3,Ccnd3,Cct4,Cdkn2aip,Cln8,Clta,Copz1,Creb1,Creb3,Cryl1,Csda,Ddit4,Ddx11,Desi2,Dguok,Dnaic1,Dnaic2,Dnaja1,Dnajb1,Dpysl2,Dpysl4,Efhc1,Elovl6,Emid1,Epb4.9,Exo5,Exoc6b,Ext1,Extl1,Fam210a,Fam65b,Fgf13,Fkbp6,Hba-a1,Hbxip,Herpud1,Hk2,Hnrnpu,Hspa1a,Hspa1b,Hspa4,Hspa5,Il17re,Il33,Ilf3,Irak1bp1,Jun,Kcnk3,Kiaa1033,…
GO.0005829	cytosol	46	6.47e-06	ENSMUSP00000000642,ENSMUSP00000003502,ENSMUSP00000004560,ENSMUSP00000005620,ENSMUSP00000010804,ENSMUSP00000014698,ENSMUSP00000020308,ENSMUSP00000020630,ENSMUSP00000021413,ENSMUSP00000021514,ENSMUSP00000022517,ENSMUSP00000022629,ENSMUSP00000022694,ENSMUSP00000028239,ENSMUSP00000028730,ENSMUSP00000030118,ENSMUSP00000030375,ENSMUSP00000030536,ENSMUSP00000032060,ENSMUSP00000033473,ENSMUSP00000034215,…	Actb,Alkbh8,Ankrd33,Atg13,Bid,Cbr3,Cct4,Creb3,Cryl1,Ddit4,Dguok,Dnaja1,Dnajb1,Dpysl2,Epb4.9,Exo5,Fgf13,Fkbp6,Gnai2,Gsn,Hba-a1,Hbxip,Hk2,Hspa4,Jun,Kcnk3,Kif3a,Mgll,Mkks,Mt1,Mtmr2,Myo1c,Nfkbia,Nfu1,Nos1,Phactr1,Pink1,Plcd1,Ppm1a,Prkca,Ptk2,Rab3b,Ric8b,Rps20,Siah2,Uba6
GO.0005575	cellular_component	203	3.89e-05	ENSMUSP00000000641,ENSMUSP00000000642,ENSMUSP00000001185,ENSMUSP00000001187,ENSMUSP00000002395,ENSMUSP00000003640,ENSMUSP00000004560,ENSMUSP00000005620,ENSMUSP00000007797,ENSMUSP00000010804,ENSMUSP00000011981,ENSMUSP00000012104,ENSMUSP00000014698,ENSMUSP00000015712,ENSMUSP00000017435,ENSMUSP00000019721,ENSMUSP00000020270,ENSMUSP00000020308,ENSMUSP00000020350,ENSMUSP00000020551,ENSMUSP00000020630,…	Acpl2,Actb,Ak3,Alas2,Aldh2,Alkbh8,Alms1,Ankrd33,Anp32a,Anxa4,Arhgef39,Asb3,Atg13,Bai3,Bdh2,Bhlhe40,Bid,Birc6,Cbr3,Ccnd3,Ccnt1,Cct4,Cd72,Cd99,Cdh7,Cdkn2aip,Cebpz,Chd2,Cln8,Clta,Copz1,Cpsf6,Creb1,Creb3,Cryl1,Csda,Ddit4,Ddx11,Ddx50,Desi2,Dguok,Dnaic1,Dnaic2,Dnajb1,Dpysl4,Efhc1,Efna1,Elovl6,Emid1,Endod1,Eomes,Epb4.9,Esco1,Exo5,Exoc6b,Ext1,Extl1,Faap20,Fam210a,Fam49b,Fam65b,Fjx1,Fkbp6,Fosb,Foxp1,Fpr2,…
GO.0044448	cell cortex part	9	0.000144	ENSMUSP00000003575,ENSMUSP00000022694,ENSMUSP00000028239,ENSMUSP00000028981,ENSMUSP00000062920,ENSMUSP00000097908,ENSMUSP00000098066,ENSMUSP00000099806,ENSMUSP00000125312	Actb,Epb4.9,Exoc6b,Gsn,Mapre1,Nelf,Tnfaip2,Tpm3,Tpm4
GO.0005856	cytoskeleton	43	0.000154	ENSMUSP00000003575,ENSMUSP00000022327,ENSMUSP00000022595,ENSMUSP00000022629,ENSMUSP00000022694,ENSMUSP00000024879,ENSMUSP00000028239,ENSMUSP00000028730,ENSMUSP00000030536,ENSMUSP00000030539,ENSMUSP00000033473,ENSMUSP00000034981,ENSMUSP00000042343,ENSMUSP00000046981,ENSMUSP00000046991,ENSMUSP00000047697,ENSMUSP00000049460,ENSMUSP00000057543,ENSMUSP00000061472,ENSMUSP00000061511,ENSMUSP00000062920,…	Actb,Alkbh8,Alms1,Birc6,Cct4,Ddx11,Dnaic1,Dnaic2,Dpysl2,Efhc1,Epb4.9,Fgf13,Gnai2,Gsn,Gtf2f2,Kif17,Kif1b,Kif3a,Ldb3,Mast2,Mid2,Mkks,Myo1c,Nelf,Nos1,Onecut2,Pink1,Plekhh1,Ptk2,Rfwd2,Rgcc,Ric8b,Rif1,Rock1,Sh3kbp1,Syne2,Taok2,Tnni3,Tpm2,Tpm3,Tpm4,Wipf2,Xrn1
GO.0044428	nuclear part	66	0.000181	ENSMUSP00000001185,ENSMUSP00000001187,ENSMUSP00000002395,ENSMUSP00000005620,ENSMUSP00000011981,ENSMUSP00000012104,ENSMUSP00000020270,ENSMUSP00000020681,ENSMUSP00000022517,ENSMUSP00000026032,ENSMUSP00000026865,ENSMUSP00000028222,ENSMUSP00000028763,ENSMUSP00000030375,ENSMUSP00000030623,ENSMUSP00000031841,ENSMUSP00000032060,ENSMUSP00000032194,ENSMUSP00000034755,ENSMUSP00000035179,ENSMUSP00000039133,…	Actb,Alkbh8,Anp32a,Anxa4,Bhlhe40,Cbr3,Ccnt1,Cct4,Cdkn2aip,Chd2,Cpsf6,Creb1,Creb3,Cryl1,Ddx11,Ddx50,Dnajb1,Exo5,Faap20,Fkbp6,Gmcl1,Gnai2,Gtf2f2,Hnrnpu,Hspa1a,Hspa5,Ilf3,Isy1,Jun,Kiaa1033,Mgll,Morf4l1,Myo1c,Nelf,Nfu1,Nos1,Nsd1,Nudt16,Onecut2,Pcgf6,Phf17,Pitpnc1,Pole4,Rbm12,Rbm4,Rec8,Rfwd2,Rnf38,Runx1t1,Sfpq,Siah2,Slu7,Snapc2,Srrm1,Srsf10,Syncrip,Syne2,Taf1b,Taf9b,Taok2,Tcf12,Tia1,Tra2a,Tyro3,Ythdc1…
GO.0070013	intracellular organelle lumen	65	0.000575	ENSMUSP00000001185,ENSMUSP00000002395,ENSMUSP00000005620,ENSMUSP00000011981,ENSMUSP00000012104,ENSMUSP00000019721,ENSMUSP00000020270,ENSMUSP00000020681,ENSMUSP00000022517,ENSMUSP00000025696,ENSMUSP00000026865,ENSMUSP00000028222,ENSMUSP00000030375,ENSMUSP00000030623,ENSMUSP00000031411,ENSMUSP00000031841,ENSMUSP00000032060,ENSMUSP00000032194,ENSMUSP00000034755,ENSMUSP00000035179,ENSMUSP00000039133,…	Actb,Ak3,Alas2,Aldh2,Alkbh8,Anp32a,Bhlhe40,Cbr3,Ccnt1,Cct4,Cdkn2aip,Chd2,Cpsf6,Creb1,Creb3,Cryl1,Ddx11,Ddx50,Dnajb1,Exo5,Faap20,Fkbp6,Gmcl1,Gnai2,Gtf2f2,Hnrnpu,Hspa1a,Hspa5,Ilf3,Jun,Kiaa1033,Mgll,Morf4l1,Myo1c,Nelf,Nfu1,Nsd1,Nudt16,Onecut2,Oxct1,Pdk4,Phf17,Pitpnc1,Pole4,Rbm12,Rbm4,Rec8,Rfwd2,Rnf38,Runx1t1,Sfpq,Siah2,Slu7,Snapc2,Srrm1,Srsf10,Syne2,Taf1b,Taf9b,Taok2,Tcf12,Tia1,Tra2a,Ythdc1,Zcchc11
GO.0031974	membrane-enclosed lumen	66	0.000577	ENSMUSP00000001185,ENSMUSP00000002395,ENSMUSP00000005620,ENSMUSP00000011981,ENSMUSP00000012104,ENSMUSP00000019721,ENSMUSP00000020270,ENSMUSP00000020681,ENSMUSP00000022517,ENSMUSP00000025696,ENSMUSP00000026865,ENSMUSP00000028222,ENSMUSP00000030375,ENSMUSP00000030536,ENSMUSP00000030623,ENSMUSP00000031411,ENSMUSP00000031841,ENSMUSP00000032060,ENSMUSP00000032194,ENSMUSP00000034755,ENSMUSP00000035179,…	Actb,Ak3,Alas2,Aldh2,Alkbh8,Anp32a,Bhlhe40,Cbr3,Ccnt1,Cct4,Cdkn2aip,Chd2,Cpsf6,Creb1,Creb3,Cryl1,Ddx11,Ddx50,Dnajb1,Exo5,Faap20,Fkbp6,Gmcl1,Gnai2,Gtf2f2,Hnrnpu,Hspa1a,Hspa5,Ilf3,Jun,Kiaa1033,Mgll,Morf4l1,Myo1c,Nelf,Nfu1,Nsd1,Nudt16,Onecut2,Oxct1,Pdk4,Phf17,Pink1,Pitpnc1,Pole4,Rbm12,Rbm4,Rec8,Rfwd2,Rnf38,Runx1t1,Sfpq,Siah2,Slu7,Snapc2,Srrm1,Srsf10,Syne2,Taf1b,Taf9b,Taok2,Tcf12,Tia1,Tra2a,Ythdc1,Zc…
GO.0005654	nucleoplasm	50	0.000651	ENSMUSP00000002395,ENSMUSP00000011981,ENSMUSP00000012104,ENSMUSP00000020681,ENSMUSP00000026865,ENSMUSP00000030375,ENSMUSP00000030623,ENSMUSP00000032060,ENSMUSP00000032194,ENSMUSP00000035179,ENSMUSP00000039133,ENSMUSP00000039322,ENSMUSP00000043193,ENSMUSP00000043713,ENSMUSP00000047571,ENSMUSP00000047697,ENSMUSP00000047712,ENSMUSP00000050461,ENSMUSP00000054270,ENSMUSP00000057543,ENSMUSP00000059973,…	Actb,Alkbh8,Bhlhe40,Cbr3,Ccnt1,Cct4,Cdkn2aip,Chd2,Cpsf6,Creb1,Creb3,Ddx11,Exo5,Faap20,Fkbp6,Gnai2,Gtf2f2,Hnrnpu,Hspa1a,Ilf3,Jun,Kiaa1033,Mgll,Morf4l1,Myo1c,Nelf,Nfu1,Nsd1,Nudt16,Onecut2,Phf17,Pitpnc1,Pole4,Rbm12,Rbm4,Rec8,Rfwd2,Rnf38,Runx1t1,Sfpq,Siah2,Slu7,Snapc2,Srrm1,Srsf10,Syne2,Taf1b,Taf9b,Tia1,Ythdc1
GO.0031981	nuclear lumen	59	0.000653	ENSMUSP00000001185,ENSMUSP00000002395,ENSMUSP00000005620,ENSMUSP00000011981,ENSMUSP00000012104,ENSMUSP00000020270,ENSMUSP00000020681,ENSMUSP00000022517,ENSMUSP00000026865,ENSMUSP00000030375,ENSMUSP00000030623,ENSMUSP00000031841,ENSMUSP00000032060,ENSMUSP00000032194,ENSMUSP00000034755,ENSMUSP00000035179,ENSMUSP00000039133,ENSMUSP00000039322,ENSMUSP00000043193,ENSMUSP00000043713,ENSMUSP00000044836,…	Actb,Alkbh8,Anp32a,Bhlhe40,Cbr3,Ccnt1,Cct4,Cdkn2aip,Chd2,Cpsf6,Creb1,Creb3,Cryl1,Ddx11,Ddx50,Dnajb1,Exo5,Faap20,Fkbp6,Gmcl1,Gnai2,Gtf2f2,Hnrnpu,Hspa1a,Ilf3,Jun,Kiaa1033,Mgll,Morf4l1,Myo1c,Nelf,Nfu1,Nsd1,Nudt16,Onecut2,Phf17,Pitpnc1,Pole4,Rbm12,Rbm4,Rec8,Rfwd2,Rnf38,Runx1t1,Sfpq,Siah2,Slu7,Snapc2,Srrm1,Srsf10,Syne2,Taf1b,Taf9b,Taok2,Tcf12,Tia1,Tra2a,Ythdc1,Zcchc11
GO.0030863	cortical cytoskeleton	7	0.000724	ENSMUSP00000003575,ENSMUSP00000022694,ENSMUSP00000028239,ENSMUSP00000028981,ENSMUSP00000062920,ENSMUSP00000097908,ENSMUSP00000098066	Actb,Epb4.9,Gsn,Mapre1,Nelf,Tpm3,Tpm4
GO.0032991	macromolecular complex	76	0.00145	ENSMUSP00000001547,ENSMUSP00000002395,ENSMUSP00000003575,ENSMUSP00000007797,ENSMUSP00000012104,ENSMUSP00000015712,ENSMUSP00000020681,ENSMUSP00000020702,ENSMUSP00000021413,ENSMUSP00000021447,ENSMUSP00000021514,ENSMUSP00000022629,ENSMUSP00000022694,ENSMUSP00000025142,ENSMUSP00000026032,ENSMUSP00000026865,ENSMUSP00000028239,ENSMUSP00000028981,ENSMUSP00000030118,ENSMUSP00000030436,ENSMUSP00000030539,…	Actb,Atp2a2,Ccnd3,Ccnt1,Cct4,Clta,Col1a1,Copz1,Cpsf6,Creb1,Ddx11,Dnaic1,Dnaic2,Dnaja1,Dpysl2,Emid1,Epb4.9,Esco1,Exoc6b,Faap20,Fgf13,Gabrb2,Gjc2,Gnai2,Gsn,Gtf2f2,Hba-a1,Hbxip,Herpud1,Hnrnpu,Igfbp3,Ilf3,Isy1,Jun,Kcnc1,Kiaa1033,Kif17,Kif1b,Kif3a,Lpl,Lsm14a,Mapre1,Mid1,Mid2,Morf4l1,Myo1c,Nelf,Nfkbia,Nsd1,Pcgf6,Phf17,Pnrc2,Pole4,Ppm1a,Ppp2r5e,Rbm4,Rec8,Rps20,Runx1t1,Sfpq,Slu7,Srrm1,Stx18,Syncrip,Syne2…
GO.0042995	cell projection	37	0.0033	ENSMUSP00000021514,ENSMUSP00000022327,ENSMUSP00000022694,ENSMUSP00000028730,ENSMUSP00000028981,ENSMUSP00000030183,ENSMUSP00000030536,ENSMUSP00000030539,ENSMUSP00000031229,ENSMUSP00000033473,ENSMUSP00000034396,ENSMUSP00000037045,ENSMUSP00000038964,ENSMUSP00000042343,ENSMUSP00000047697,ENSMUSP00000050034,ENSMUSP00000061472,ENSMUSP00000062158,ENSMUSP00000062392,ENSMUSP00000062920,ENSMUSP00000063468,…	Alms1,Car9,Dclk1,Dnaic1,Dnaic2,Efhc1,Epb4.9,Fam49b,Fam65b,Fgf13,Kcnc1,Kif17,Kif1b,Ldb3,Lrrc4,Mapre1,Mgll,Mkks,Mtmr2,Myo1c,Ncam2,Ncmap,Nelf,Nos1,Pink1,Ppm1a,Prkca,Ptk2,Rbm3,Rock1,Rufy3,Sh3kbp1,Siah2,Sstr1,Syne2,Taok2,Tpm3
GO.0044463	cell projection part	23	0.00526	ENSMUSP00000022629,ENSMUSP00000022694,ENSMUSP00000028730,ENSMUSP00000028981,ENSMUSP00000030183,ENSMUSP00000030539,ENSMUSP00000033473,ENSMUSP00000034396,ENSMUSP00000042343,ENSMUSP00000047697,ENSMUSP00000050034,ENSMUSP00000062158,ENSMUSP00000062920,ENSMUSP00000065787,ENSMUSP00000071904,ENSMUSP00000100028,ENSMUSP00000101486,ENSMUSP00000104069,ENSMUSP00000106013,ENSMUSP00000112782,ENSMUSP00000120421,…	Alms1,Car9,Dclk1,Dnaic1,Dnaic2,Dpysl2,Efhc1,Epb4.9,Fam65b,Fgf13,Kcnc1,Kif17,Kif3a,Lrrc4,Mapre1,Mgll,Mkks,Mtmr2,Myo1c,Ncmap,Nos1,Syne2,Tpm3
GO.0097458	neuron part	27	0.0068	ENSMUSP00000003502,ENSMUSP00000021514,ENSMUSP00000022694,ENSMUSP00000030536,ENSMUSP00000031229,ENSMUSP00000033473,ENSMUSP00000034396,ENSMUSP00000037045,ENSMUSP00000038964,ENSMUSP00000042343,ENSMUSP00000050034,ENSMUSP00000061472,ENSMUSP00000062158,ENSMUSP00000062392,ENSMUSP00000062920,ENSMUSP00000063468,ENSMUSP00000067496,ENSMUSP00000097908,ENSMUSP00000100008,ENSMUSP00000101486,ENSMUSP00000108075,…	Creb3,Dclk1,Efhc1,Epb4.9,Fgf13,Herpud1,Kcnc1,Kif1b,Lrrc4,Mgll,Mtmr2,Ncam2,Ncmap,Nelf,Nos1,Pink1,Ppm1a,Prkca,Rab3b,Rbm3,Rdh11,Rufy3,Sh3kbp1,Siah2,Sstr1,Taok2,Tpm3
GO.0005938	cell cortex	10	0.00728	ENSMUSP00000003575,ENSMUSP00000022694,ENSMUSP00000028239,ENSMUSP00000028981,ENSMUSP00000046981,ENSMUSP00000062920,ENSMUSP00000097908,ENSMUSP00000098066,ENSMUSP00000099806,ENSMUSP00000125312	Actb,Epb4.9,Exoc6b,Gsn,Mapre1,Nelf,Ric8b,Tnfaip2,Tpm3,Tpm4
GO.0044430	cytoskeletal part	29	0.0113	ENSMUSP00000003575,ENSMUSP00000022595,ENSMUSP00000022629,ENSMUSP00000022694,ENSMUSP00000024879,ENSMUSP00000028239,ENSMUSP00000028730,ENSMUSP00000030539,ENSMUSP00000033473,ENSMUSP00000038765,ENSMUSP00000042343,ENSMUSP00000046981,ENSMUSP00000057543,ENSMUSP00000061472,ENSMUSP00000062920,ENSMUSP00000064155,ENSMUSP00000065787,ENSMUSP00000069549,ENSMUSP00000071904,ENSMUSP00000076160,ENSMUSP00000096458,…	Alms1,Birc6,Cct4,Ddx11,Dnaic1,Dnaic2,Dpysl2,Efhc1,Epb4.9,Fgf13,Gnai2,Gsn,Kif17,Kif1b,Kif3a,Mid1,Mid2,Mkks,Myo1c,Ptk2,Rfwd2,Rgcc,Ric8b,Rif1,Rock1,Tnni3,Tpm2,Tpm3,Tpm4
GO.0044451	nucleoplasm part	19	0.0113	ENSMUSP00000012104,ENSMUSP00000020681,ENSMUSP00000026865,ENSMUSP00000030623,ENSMUSP00000039133,ENSMUSP00000068408,ENSMUSP00000076160,ENSMUSP00000082346,ENSMUSP00000084586,ENSMUSP00000086312,ENSMUSP00000093462,ENSMUSP00000097089,ENSMUSP00000098066,ENSMUSP00000100008,ENSMUSP00000101479,ENSMUSP00000109123,ENSMUSP00000125003,ENSMUSP00000137116,ENSMUSP00000137345	Actb,Ccnt1,Cpsf6,Creb3,Faap20,Gtf2f2,Hspa1a,Morf4l1,Nsd1,Phf17,Pole4,Rbm4,Rfwd2,Sfpq,Slu7,Srrm1,Srsf10,Taf9b,Ythdc1
GO.0048471	perinuclear region of cytoplasm	17	0.0201	ENSMUSP00000001187,ENSMUSP00000003502,ENSMUSP00000022327,ENSMUSP00000022694,ENSMUSP00000026826,ENSMUSP00000028239,ENSMUSP00000030118,ENSMUSP00000030536,ENSMUSP00000031423,ENSMUSP00000034215,ENSMUSP00000039110,ENSMUSP00000045009,ENSMUSP00000062392,ENSMUSP00000082652,ENSMUSP00000084586,ENSMUSP00000105663,ENSMUSP00000137345	Anp32a,Anxa4,Atp2a2,Dnaja1,Epb4.9,Gsn,Hspa1a,Ldb3,Mt1,Pink1,Prkca,Ptk2,Rab3b,Rab40c,Rbm4,Serbp1,Trim13
GO.0060171	stereocilium membrane	2	0.0201	ENSMUSP00000104069,ENSMUSP00000106013	Fam65b,Myo1c
GO.0015630	microtubule cytoskeleton	24	0.0223	ENSMUSP00000022595,ENSMUSP00000022629,ENSMUSP00000024879,ENSMUSP00000028730,ENSMUSP00000030539,ENSMUSP00000033473,ENSMUSP00000042343,ENSMUSP00000046981,ENSMUSP00000057543,ENSMUSP00000061472,ENSMUSP00000061511,ENSMUSP00000064155,ENSMUSP00000065787,ENSMUSP00000069549,ENSMUSP00000071904,ENSMUSP00000076160,ENSMUSP00000086312,ENSMUSP00000100028,ENSMUSP00000102095,ENSMUSP00000105663,ENSMUSP00000108617,…	Alkbh8,Alms1,Birc6,Cct4,Ddx11,Dnaic1,Dnaic2,Dpysl2,Efhc1,Fgf13,Gnai2,Gtf2f2,Kif17,Kif1b,Kif3a,Mast2,Mid2,Mkks,Ptk2,Rfwd2,Rgcc,Ric8b,Rif1,Rock1
GO.0043234	protein complex	62	0.0275	ENSMUSP00000001547,ENSMUSP00000002395,ENSMUSP00000003575,ENSMUSP00000007797,ENSMUSP00000012104,ENSMUSP00000020702,ENSMUSP00000021413,ENSMUSP00000021447,ENSMUSP00000021514,ENSMUSP00000022629,ENSMUSP00000022694,ENSMUSP00000026032,ENSMUSP00000026865,ENSMUSP00000028239,ENSMUSP00000028981,ENSMUSP00000030118,ENSMUSP00000030536,ENSMUSP00000030539,ENSMUSP00000031224,ENSMUSP00000031423,ENSMUSP00000033473,…	Actb,Atp2a2,Ccnd3,Ccnt1,Cct4,Clta,Col1a1,Copz1,Cpsf6,Creb1,Dnaic1,Dnaic2,Dnaja1,Dpysl2,Emid1,Epb4.9,Exoc6b,Faap20,Fgf13,Gabrb2,Gjc2,Gnai2,Gsn,Gtf2f2,Hba-a1,Hbxip,Herpud1,Hnrnpu,Igfbp3,Jun,Kcnc1,Kiaa1033,Kif17,Kif1b,Kif3a,Mapre1,Mid1,Mid2,Morf4l1,Myo1c,Nfkbia,Nsd1,Pcgf6,Phf17,Pink1,Pole4,Ppm1a,Ppp2r5e,Rec8,Runx1t1,Stx18,Syncrip,Syne2,Taf1b,Taf9b,Taok2,Tcf12,Tgfbr3,Tnfaip2,Tnni3,Tpm3,Tpm4
GO.0016363	nuclear matrix	6	0.0278	ENSMUSP00000001185,ENSMUSP00000030623,ENSMUSP00000082652,ENSMUSP00000095857,ENSMUSP00000097908,ENSMUSP00000125003	Anp32a,Gmcl1,Nelf,Runx1t1,Sfpq,Srrm1
GO.0036464	cytoplasmic ribonucleoprotein granule	7	0.0281	ENSMUSP00000030436,ENSMUSP00000034981,ENSMUSP00000047571,ENSMUSP00000082723,ENSMUSP00000093425,ENSMUSP00000098066,ENSMUSP00000137345	Actb,Hnrnpu,Lsm14a,Pnrc2,Rbm4,Tia1,Xrn1
GO.0043005	neuron projection	21	0.0281	ENSMUSP00000021514,ENSMUSP00000030536,ENSMUSP00000031229,ENSMUSP00000033473,ENSMUSP00000034396,ENSMUSP00000037045,ENSMUSP00000038964,ENSMUSP00000061472,ENSMUSP00000062158,ENSMUSP00000062392,ENSMUSP00000062920,ENSMUSP00000063468,ENSMUSP00000067496,ENSMUSP00000097908,ENSMUSP00000101486,ENSMUSP00000108075,ENSMUSP00000112782,ENSMUSP00000112963,ENSMUSP00000120421,ENSMUSP00000124938,ENSMUSP00000127374	Fgf13,Kcnc1,Kif1b,Kif3a,Lrrc4,Mgll,Mtmr2,Ncam2,Ncmap,Nelf,Nos1,Pink1,Ppm1a,Prkca,Rbm3,Rufy3,Sh3kbp1,Siah2,Sstr1,Taok2,Tpm3
GO.0012505	endomembrane system	55	0.0301	ENSMUSP00000000641,ENSMUSP00000001185,ENSMUSP00000001187,ENSMUSP00000001547,ENSMUSP00000003502,ENSMUSP00000020350,ENSMUSP00000022517,ENSMUSP00000022603,ENSMUSP00000022694,ENSMUSP00000024879,ENSMUSP00000025295,ENSMUSP00000025724,ENSMUSP00000026826,ENSMUSP00000027053,ENSMUSP00000027554,ENSMUSP00000028222,ENSMUSP00000028763,ENSMUSP00000028981,ENSMUSP00000029047,ENSMUSP00000030118,ENSMUSP00000030643,…	Acpl2,Anp32a,Anxa4,Atp2a2,Bhlhe40,Birc6,Cln8,Col1a1,Copz1,Creb3,Cryl1,Dnaja1,Elovl6,Emid1,Epb4.9,Ext1,Extl1,Fkbp6,Gmcl1,Hbxip,Herpud1,Hspa5,Il33,Kiaa1033,Lect1,Lgr5,Mapre1,Mtmr2,Myo1c,Nelf,Nos1,Pgap1,Pigo,Plat,Prkca,Rab3b,Rab40b,Rab40c,Rdh10,Rdh11,Rfwd2,Rock1,Sema4f,Siah2,Snx16,Spry4,St6galnac5,Stx18,Syne2,Tgfbr3,Tmem59l,Trim13,Tyro3,Vkorc1l1,Xrn1
GO.0071944	cell periphery	64	0.0435	ENSMUSP00000000641,ENSMUSP00000001187,ENSMUSP00000003502,ENSMUSP00000003575,ENSMUSP00000007797,ENSMUSP00000015712,ENSMUSP00000020270,ENSMUSP00000020350,ENSMUSP00000021413,ENSMUSP00000021514,ENSMUSP00000022517,ENSMUSP00000022694,ENSMUSP00000026826,ENSMUSP00000026865,ENSMUSP00000027542,ENSMUSP00000028222,ENSMUSP00000028238,ENSMUSP00000028239,ENSMUSP00000028763,ENSMUSP00000028981,ENSMUSP00000029566,…	Actb,Anxa4,Arhgef39,Atp2a2,Bai3,Cd72,Cdh7,Clta,Cryl1,Ddx50,Dnaic2,Efna1,Epb4.9,Exoc6b,Fam65b,Fgf13,Fpr2,Fxyd7,Gabrb2,Gjc2,Gnai2,Gpr162,Gpr3,Gsn,Hspa5,Il17re,Kcnc1,Kcnk3,Kif17,Lgr5,Lpl,Lrrc4,Mapre1,Matk,Mpzl1,Mtmr2,Myo1c,Ncam2,Ncmap,Nelf,Nfkbia,Nos1,Paqr7,Phf17,Ppm1a,Prkca,Ptk2,Rab14,Rab3b,Rab40b,Rab40c,Ric8b,Rif1,Rock1,Sema4f,Serbp1,Sstr1,Syne2,Tgfbr3,Tnfaip2,Tpm3,Tpm4,Tyro3,Xrn1
