# Supplementary material for: Progression of pathology in PINK1-deficient mouse brain from splicing via ubiquitination, ER stress, and mitophagy changes to neuroinflammation
Source: J Neuroinflammation. 2017 Aug 2;14:154. doi: 10.1186/s12974-017-0928-0 (PMC5541666; doi:10.1186/s12974-017-0928-0)
Supplement: Supplementary file 3 — STRING bioinformatics assessment of all significant changes, including subtle effects. Ranked list of the significant transcript expression changes in PINK1-deficient mouse cerebellar tissue at ages 6 weeks, 6 months, and 18 months, which were used as input for the STRING analysis (A). Significant functional enrichments in the protein-protein-interaction network according to the STRING database is shown regarding GO Cellular component at 6 weeks with all factors of AdjPvalue <0.05 (B), 6 months with all factors of AdjPvalue <0.05 (C), and 18 months with all factors of AdjPvalue <0.01, with the term “intracellular membrane-bounded organelle” being prominent at all 3 ages (D). Prominent enrichments were highlighted in yellow color. In GO Molecular Process at 18 months with all factors of AdjPvalue <0.01 the relevance of stimulus- and stress-dependent pathways is apparent, e.g., endoplasmic reticulum stress, and a significant enrichment of mitophagy factors appears here in lines 495 and 518 (E). Among KEGG pathways at 18 months with all factors of AdjPvalue <0.01, the highest ranked pathways include “MAPK signaling”, “Ubiquitin-mediated proteolysis”, “Protein processing in endoplasmic reticulum” and “Bacterial invasion of epithelial cells” (F). Orange color was used to highlight some MAPK-dependent synaptic signaling pathways with significant enrichment, purple color was used for ubiquitination and protein processing pathways, green color was used for neuroinflammation pathways. (ZIP 366 kb) [file 12974_2017_928_MOESM3_ESM.zip › TorresAuburger-SupplTableS2C.xls]

## Sheet: Pink1KOcbll6mo-GOcellComponent
#pathway ID	pathway description	observed gene count	false discovery rate	matching proteins in your network (IDs)	matching proteins in your network (labels)
GO.0043229	intracellular organelle	874	4.99e-63	ENSMUSP00000000080,ENSMUSP00000000335,ENSMUSP00000000632,ENSMUSP00000000641,ENSMUSP00000000642,ENSMUSP00000000767,ENSMUSP00000000910,ENSMUSP00000001187,ENSMUSP00000001507,ENSMUSP00000001547,ENSMUSP00000001559,ENSMUSP00000001592,ENSMUSP00000001675,ENSMUSP00000001757,ENSMUSP00000001836,ENSMUSP00000001884,ENSMUSP00000002320,ENSMUSP00000002572,ENSMUSP00000002683,ENSMUSP00000002818,ENSMUSP00000002837,…	AI480653,AU040320,AY007814,Abcg1,Abcg2,Abhd14b,Abhd5,Abi2,Acaa2,Ache,Acn9,Acpl2,Acsl3,Acsl4,Actl6b,Actn1,Adcy1,Add3,Adk,Adora1,Adpgk,Agbl5,Agpat5,Agxt2l1,Aifm3,Ak2,Ak3,Alas2,Alkbh3,Alkbh5,Alkbh8,Alms1,Als2,Als2cl,Anapc10,Anapc15,Anapc5,Ankrd33,Anp32a,Anpep,Anxa11,Anxa4,Ap1g1,Ap2a1,Ap3b1,Aplp2,Appbp2,Arf2,Arf3,Arf4,Arid3b,Arid4b,Arid5b,Arl8a,Armcx3,Arnt,Arrdc1,Arrdc3,Asah2,Asah3l,Asf1a,Asph,Astn2,…
GO.0043231	intracellular membrane-bounded organelle	826	3.19e-62	ENSMUSP00000000080,ENSMUSP00000000335,ENSMUSP00000000632,ENSMUSP00000000641,ENSMUSP00000000642,ENSMUSP00000000767,ENSMUSP00000000910,ENSMUSP00000001187,ENSMUSP00000001507,ENSMUSP00000001547,ENSMUSP00000001559,ENSMUSP00000001592,ENSMUSP00000001757,ENSMUSP00000001836,ENSMUSP00000001884,ENSMUSP00000002320,ENSMUSP00000002572,ENSMUSP00000002683,ENSMUSP00000002818,ENSMUSP00000002837,ENSMUSP00000003818,…	AI480653,AY007814,Abcg1,Abcg2,Abhd14b,Abhd5,Acaa2,Ache,Acn9,Acpl2,Acsl3,Acsl4,Actl6b,Actn1,Adcy1,Add3,Adk,Adora1,Adpgk,Agbl5,Agpat5,Agxt2l1,Aifm3,Ak2,Ak3,Alas2,Alkbh3,Alkbh5,Alkbh8,Als2,Als2cl,Anapc10,Anapc15,Anapc5,Ankrd33,Anp32a,Anpep,Anxa11,Anxa4,Ap1g1,Ap2a1,Ap3b1,Aplp2,Appbp2,Arf2,Arf3,Arf4,Arid3b,Arid4b,Arid5b,Arl8a,Armcx3,Arnt,Arrdc3,Asah2,Asah3l,Asf1a,Asph,Astn2,Atcay,Atg5,Atg9a,Atic,Atp11…
GO.0044424	intracellular part	939	2.74e-61	ENSMUSP00000000080,ENSMUSP00000000365,ENSMUSP00000000632,ENSMUSP00000000641,ENSMUSP00000000642,ENSMUSP00000000767,ENSMUSP00000000910,ENSMUSP00000001187,ENSMUSP00000001507,ENSMUSP00000001548,ENSMUSP00000001559,ENSMUSP00000001592,ENSMUSP00000001675,ENSMUSP00000001757,ENSMUSP00000001836,ENSMUSP00000001884,ENSMUSP00000002320,ENSMUSP00000002572,ENSMUSP00000002683,ENSMUSP00000002818,ENSMUSP00000002837,…	AI480653,AU040320,AY007814,Aasdhppt,Abcg1,Abcg2,Abhd14b,Abhd5,Abi2,Acaa2,Ache,Acn9,Acpl2,Acsl3,Acsl4,Actl6b,Actn1,Add3,Adk,Adora1,Adpgk,Adrbk1,Agap1,Agbl5,Agpat5,Agxt2l1,Aifm3,Ak2,Ak3,Alas2,Alkbh3,Alkbh5,Alkbh8,Alms1,Als2,Als2cl,Anapc10,Anapc15,Anapc5,Ankrd33,Anp32a,Anpep,Anxa11,Anxa4,Anxa9,Aplp2,Appbp2,Arf2,Arf3,Arhgap33,Arhgef1,Arid3b,Arid4b,Arid5b,Arl8a,Armcx3,Arnt,Arpp19,Arrdc1,Arrdc3,Asah2,A…
GO.0005622	intracellular	952	9.83e-61	ENSMUSP00000000080,ENSMUSP00000000365,ENSMUSP00000000632,ENSMUSP00000000641,ENSMUSP00000000642,ENSMUSP00000000767,ENSMUSP00000000910,ENSMUSP00000001187,ENSMUSP00000001507,ENSMUSP00000001548,ENSMUSP00000001559,ENSMUSP00000001592,ENSMUSP00000001675,ENSMUSP00000001757,ENSMUSP00000001836,ENSMUSP00000001884,ENSMUSP00000002320,ENSMUSP00000002572,ENSMUSP00000002683,ENSMUSP00000002818,ENSMUSP00000002837,…	AI480653,AU040320,AY007814,Aasdhppt,Abcg1,Abcg2,Abhd14b,Abhd5,Abi2,Acaa2,Ache,Acn9,Acpl2,Acsl3,Acsl4,Actl6b,Actn1,Adcy9,Add3,Adk,Adora1,Adpgk,Adrbk1,Agap1,Agbl5,Agpat5,Agxt2l1,Aifm3,Ak2,Ak3,Alas2,Alkbh3,Alkbh5,Alkbh8,Alms1,Als2,Als2cl,Anapc10,Anapc15,Anapc5,Ankrd33,Anp32a,Anpep,Anxa11,Anxa4,Anxa9,Aplp2,Appbp2,Arf2,Arf3,Arhgap33,Arhgef1,Arid3b,Arid4b,Arid5b,Arl15,Arl5a,Arl5b,Arl8a,Armcx3,Arnt,Arpp…
GO.0043227	membrane-bounded organelle	880	6.95e-60	ENSMUSP00000000080,ENSMUSP00000000335,ENSMUSP00000000632,ENSMUSP00000000641,ENSMUSP00000000642,ENSMUSP00000000767,ENSMUSP00000000910,ENSMUSP00000001187,ENSMUSP00000001507,ENSMUSP00000001547,ENSMUSP00000001548,ENSMUSP00000001559,ENSMUSP00000001592,ENSMUSP00000001757,ENSMUSP00000001824,ENSMUSP00000001836,ENSMUSP00000001884,ENSMUSP00000001920,ENSMUSP00000002320,ENSMUSP00000002400,ENSMUSP00000002572,…	AI480653,AU040320,AY007814,Aasdhppt,Abcg1,Abcg2,Abhd14b,Abhd5,Abi2,Acaa2,Ache,Acn9,Acpl2,Acsl3,Acsl4,Actl6b,Actn1,Add3,Adk,Adora1,Adpgk,Agbl5,Agpat5,Agxt2l1,Aif1l,Aifm3,Ak2,Ak3,Alas2,Alkbh3,Alkbh5,Alkbh8,Als2,Als2cl,Anapc10,Anapc15,Anapc5,Ankrd33,Anp32a,Anpep,Anxa11,Anxa4,Anxa9,Ap1g1,Ap2a1,Ap3b1,Aplp2,Appbp2,Arf2,Arf3,Arid3b,Arid4b,Arid5b,Arl15,Arl8a,Armcx3,Arnt,Arrdc1,Arrdc3,Asah2,Asah3l,Asf1a,A…
GO.0043226	organelle	914	1.35e-58	ENSMUSP00000000080,ENSMUSP00000000335,ENSMUSP00000000632,ENSMUSP00000000641,ENSMUSP00000000642,ENSMUSP00000000767,ENSMUSP00000000910,ENSMUSP00000001187,ENSMUSP00000001507,ENSMUSP00000001547,ENSMUSP00000001548,ENSMUSP00000001559,ENSMUSP00000001592,ENSMUSP00000001675,ENSMUSP00000001757,ENSMUSP00000001824,ENSMUSP00000001836,ENSMUSP00000001884,ENSMUSP00000002320,ENSMUSP00000002400,ENSMUSP00000002572,…	AI480653,AU040320,AY007814,Aasdhppt,Abcg1,Abcg2,Abhd14b,Abhd5,Acaa2,Ache,Acn9,Acpl2,Acsl3,Acsl4,Actl6b,Actn1,Add3,Adk,Adora1,Adpgk,Adrbk1,Agbl5,Agpat5,Agxt2l1,Aifm3,Ak2,Ak3,Alas2,Alkbh3,Alkbh5,Alkbh8,Alms1,Als2,Als2cl,Anapc10,Anapc15,Anapc5,Ankrd33,Anp32a,Anpep,Anxa11,Anxa4,Anxa9,Ap1g1,Ap2a1,Ap3b1,Aplp2,Appbp2,Arf2,Arf3,Arid3b,Arid4b,Arid5b,Arl15,Arl8a,Armcx3,Arnt,Arrdc1,Arrdc3,Asah2,Asah3l,Asf1a…
GO.0005623	cell	1006	2.89e-56	ENSMUSP00000000080,ENSMUSP00000000365,ENSMUSP00000000632,ENSMUSP00000000641,ENSMUSP00000000642,ENSMUSP00000000767,ENSMUSP00000000910,ENSMUSP00000001187,ENSMUSP00000001256,ENSMUSP00000001507,ENSMUSP00000001559,ENSMUSP00000001592,ENSMUSP00000001675,ENSMUSP00000001757,ENSMUSP00000001824,ENSMUSP00000001836,ENSMUSP00000001884,ENSMUSP00000002320,ENSMUSP00000002572,ENSMUSP00000002683,ENSMUSP00000002818,…	AI480653,AU040320,AY007814,Aasdhppt,Abcg1,Abcg2,Abcg8,Abhd14b,Abhd5,Abi2,Acaa2,Accn1,Ache,Acn9,Acpl2,Acsl3,Actl6b,Actn1,Add3,Adk,Adp,Adpgk,Adrbk1,Agap1,Agbl5,Agpat5,Agxt2l1,Aifm3,Ak2,Ak3,Alas2,Alkbh3,Alkbh5,Alkbh8,Alms1,Als2cl,Anapc10,Anapc15,Anapc5,Ankrd33,Anp32a,Anpep,Anxa11,Anxa4,Anxa9,Aplnr,Aplp2,Appbp2,Arf2,Arf3,Arhgap33,Arhgef1,Arid3b,Arid4b,Arid5b,Arl15,Arl5a,Arl5b,Arl8a,Armcx3,Arnt,Arpp19…
GO.0044464	cell part	1004	2.89e-56	ENSMUSP00000000080,ENSMUSP00000000365,ENSMUSP00000000632,ENSMUSP00000000641,ENSMUSP00000000642,ENSMUSP00000000767,ENSMUSP00000000910,ENSMUSP00000001187,ENSMUSP00000001256,ENSMUSP00000001507,ENSMUSP00000001559,ENSMUSP00000001592,ENSMUSP00000001675,ENSMUSP00000001757,ENSMUSP00000001824,ENSMUSP00000001836,ENSMUSP00000001884,ENSMUSP00000002320,ENSMUSP00000002572,ENSMUSP00000002683,ENSMUSP00000002818,…	AI480653,AU040320,AY007814,Aasdhppt,Abcg1,Abcg2,Abcg8,Abhd14b,Abhd5,Abi2,Acaa2,Accn1,Ache,Acn9,Acpl2,Acsl3,Actl6b,Actn1,Add3,Adk,Adp,Adpgk,Adrbk1,Agap1,Agbl5,Agpat5,Agxt2l1,Aifm3,Ak2,Ak3,Alas2,Alkbh3,Alkbh5,Alkbh8,Alms1,Als2cl,Anapc10,Anapc15,Anapc5,Ankrd33,Anp32a,Anpep,Anxa11,Anxa4,Anxa9,Aplnr,Aplp2,Appbp2,Arf2,Arf3,Arhgap33,Arhgef1,Arid3b,Arid4b,Arid5b,Arl15,Arl5a,Arl5b,Arl8a,Armcx3,Arnt,Arpp19…
GO.0005634	nucleus	559	1.18e-42	ENSMUSP00000000080,ENSMUSP00000000632,ENSMUSP00000000767,ENSMUSP00000001187,ENSMUSP00000001559,ENSMUSP00000001569,ENSMUSP00000001592,ENSMUSP00000001757,ENSMUSP00000001836,ENSMUSP00000002320,ENSMUSP00000002572,ENSMUSP00000002683,ENSMUSP00000003870,ENSMUSP00000003876,ENSMUSP00000003911,ENSMUSP00000004051,ENSMUSP00000004054,ENSMUSP00000004094,ENSMUSP00000004097,ENSMUSP00000004330,ENSMUSP00000004780,…	AY007814,Abcg1,Abcg2,Abhd14b,Abhd5,Acr,Actl6b,Adcy1,Add3,Adk,Agbl5,Agpat5,Alkbh3,Alkbh5,Alkbh8,Als2,Amot,Anapc10,Anapc15,Anapc5,Ankrd33,Anp32a,Anxa11,Anxa4,Apba1,Aplp2,Appbp2,Arid3b,Arid4b,Arid5b,Arnt,Asf1a,Atrx,Atxn2l,Azin1,Bach2,Bahcc1,Baiap2,Banp,Bcas3,Bcl2,Bcl6,Bcl9l,Bloc1s6,Blzf1,Brcc3,Brd8,Brdt,Brix1,Brsk1,Cabp1,Cacul1,Camk2n2,Camk4,Camkmt,Camta1,Camta2,Carm1,Casp3,Casp8ap2,Cbfa2t3,Cbfb,Cbx…
GO.0005737	cytoplasm	769	1.37e-41	ENSMUSP00000000080,ENSMUSP00000000129,ENSMUSP00000000365,ENSMUSP00000000632,ENSMUSP00000000641,ENSMUSP00000000642,ENSMUSP00000000910,ENSMUSP00000001187,ENSMUSP00000001507,ENSMUSP00000001548,ENSMUSP00000001559,ENSMUSP00000001569,ENSMUSP00000001592,ENSMUSP00000001675,ENSMUSP00000001757,ENSMUSP00000001836,ENSMUSP00000001884,ENSMUSP00000001920,ENSMUSP00000002572,ENSMUSP00000002818,ENSMUSP00000002837,…	AI480653,AU040320,AY007814,Aasdhppt,Abcg1,Abcg2,Abhd14b,Abhd5,Abi2,Acaa2,Ache,Acn9,Acpl2,Acsl3,Acsl4,Actn1,Adcy1,Add3,Adk,Adora1,Adpgk,Adrbk1,Agap1,Agbl5,Agpat5,Agxt2l1,Aif1l,Aifm3,Ak2,Ak3,Alas2,Alkbh3,Alkbh8,Alms1,Als2,Als2cl,Amot,Anapc10,Ankrd33,Anp32a,Anpep,Anxa11,Anxa4,Anxa9,Appbp2,Appl1,Arf2,Arf3,Arhgap33,Arhgef1,Arl8a,Armcx3,Arnt,Arpp19,Arrdc1,Arrdc3,Asah2,Asah3l,Asb6,Asph,Astn2,Atcay,Atg10…
GO.0044446	intracellular organelle part	604	1.44e-41	ENSMUSP00000000001,ENSMUSP00000000129,ENSMUSP00000000632,ENSMUSP00000000642,ENSMUSP00000000767,ENSMUSP00000000910,ENSMUSP00000001187,ENSMUSP00000001507,ENSMUSP00000001559,ENSMUSP00000001592,ENSMUSP00000001836,ENSMUSP00000001920,ENSMUSP00000002683,ENSMUSP00000002818,ENSMUSP00000002837,ENSMUSP00000003575,ENSMUSP00000003818,ENSMUSP00000003870,ENSMUSP00000003876,ENSMUSP00000003911,ENSMUSP00000004054,…	AI480653,AY007814,Abcg1,Abcg2,Abhd14b,Acaa2,Acn9,Acpl2,Acsl3,Acsl4,Actl6b,Actn1,Add3,Adk,Agbl5,Agpat5,Aif1l,Aifm3,Ak2,Ak3,Alas2,Alkbh3,Alkbh5,Alkbh8,Alms1,Als2,Anapc10,Anapc15,Anapc5,Anp32a,Anpep,Anxa11,Anxa4,Ap1g1,Ap3b1,Appbp2,Arid3b,Arl8a,Armcx3,Arnt,Asah3l,Asf1a,Asph,Atcay,Atg9a,Atp11c,Atp6v1a,Atrx,Atxn2l,B4galt5,Bahcc1,Baiap2,Banp,Bcas3,Bckdhb,Bcl2,Bcl2l11,Bcl6,Bcl9l,Bid,Bloc1s6,Brcc3,Brd8,Br…
GO.0044422	organelle part	615	3.49e-41	ENSMUSP00000000001,ENSMUSP00000000129,ENSMUSP00000000632,ENSMUSP00000000642,ENSMUSP00000000767,ENSMUSP00000000910,ENSMUSP00000001187,ENSMUSP00000001507,ENSMUSP00000001559,ENSMUSP00000001592,ENSMUSP00000001836,ENSMUSP00000001920,ENSMUSP00000002572,ENSMUSP00000002683,ENSMUSP00000002818,ENSMUSP00000002837,ENSMUSP00000003575,ENSMUSP00000003818,ENSMUSP00000003870,ENSMUSP00000003876,ENSMUSP00000003911,…	AI480653,AY007814,Abcg1,Abcg2,Abhd14b,Acaa2,Acn9,Acpl2,Acsl3,Acsl4,Actl6b,Actn1,Add3,Adk,Agbl5,Agpat5,Aif1l,Aifm3,Ak2,Ak3,Alas2,Alkbh3,Alkbh5,Alkbh8,Alms1,Als2,Anapc10,Anapc15,Anapc5,Anp32a,Anpep,Anxa11,Anxa4,Ap1g1,Ap3b1,Appbp2,Arid3b,Arl8a,Armcx3,Arnt,Asah3l,Asf1a,Asph,Atcay,Atg5,Atg7,Atg9a,Atp11c,Atp6v1a,Atrx,Atxn2l,B4galt5,Bahcc1,Baiap2,Banp,Bcas3,Bckdhb,Bcl2,Bcl2l11,Bcl6,Bcl9l,Bid,Bloc1s6,Brc…
GO.0005575	cellular_component	1034	2.88e-37	ENSMUSP00000000080,ENSMUSP00000000365,ENSMUSP00000000632,ENSMUSP00000000641,ENSMUSP00000000642,ENSMUSP00000000767,ENSMUSP00000000910,ENSMUSP00000001115,ENSMUSP00000001187,ENSMUSP00000001256,ENSMUSP00000001507,ENSMUSP00000001559,ENSMUSP00000001592,ENSMUSP00000001675,ENSMUSP00000001757,ENSMUSP00000001836,ENSMUSP00000001884,ENSMUSP00000002320,ENSMUSP00000002400,ENSMUSP00000002572,ENSMUSP00000002683,…	AI480653,AI597468,AU022687,AU040320,AY007814,Aasdhppt,Abcg1,Abcg2,Abcg8,Abhd14b,Abhd5,Acaa2,Accn1,Ache,Acn9,Acpl2,Acsl3,Actl6b,Actn1,Adamts16,Add3,Adk,Adp,Adpgk,Adrbk1,Agap1,Agbl5,Agfg2,Agpat5,Agxt2l1,Aifm3,Ak2,Ak3,Alas2,Alkbh3,Alkbh5,Alkbh8,Alms1,Als2cl,Anapc10,Anapc15,Anapc5,Ankrd33,Anp32a,Anpep,Anxa11,Anxa4,Anxa9,Aplnr,Aplp2,Appbp2,Arf2,Arf3,Arhgap33,Arhgef1,Arid3b,Arid4b,Arid5b,Arl5a,Arl5b,Ar…
GO.0044428	nuclear part	331	6.26e-26	ENSMUSP00000000129,ENSMUSP00000000632,ENSMUSP00000000767,ENSMUSP00000001187,ENSMUSP00000001559,ENSMUSP00000001569,ENSMUSP00000001592,ENSMUSP00000001836,ENSMUSP00000002683,ENSMUSP00000002825,ENSMUSP00000003870,ENSMUSP00000003876,ENSMUSP00000003911,ENSMUSP00000004054,ENSMUSP00000004780,ENSMUSP00000004990,ENSMUSP00000005507,ENSMUSP00000005606,ENSMUSP00000005620,ENSMUSP00000005954,ENSMUSP00000008445,…	Abcg1,Abcg2,Abhd14b,Actl6b,Add3,Adk,Agpat5,Alkbh3,Alkbh5,Alkbh8,Amot,Anapc10,Anapc15,Anapc5,Anp32a,Anxa11,Anxa4,Appl1,Arid3b,Arnt,Asf1a,Atrx,Atxn2l,Bahcc1,Baiap2,Banp,Baz1b,Bcl2,Bcl9l,Bloc1s6,Blzf1,Brcc3,Brd8,Brix1,Brsk1,Cacul1,Camk4,Carm1,Casp8ap2,Cbfa2t3,Cbx4,Ccdc97,Cct4,Cd3eap,Cdk12,Cdkn1a,Cdkn2aip,Cep68,Cfl1,Cfl2,Chtf18,Chuk,Ciapin1,Cirbp,Cmpk1,Cnp,Col4a3bp,Cops2,Cops7a,Cotl1,Cpsf2,Cpsf6,Crbn…
GO.0044444	cytoplasmic part	531	1.86e-25	ENSMUSP00000000129,ENSMUSP00000000641,ENSMUSP00000000642,ENSMUSP00000000910,ENSMUSP00000001187,ENSMUSP00000001507,ENSMUSP00000001547,ENSMUSP00000001548,ENSMUSP00000001559,ENSMUSP00000001569,ENSMUSP00000001592,ENSMUSP00000001836,ENSMUSP00000001884,ENSMUSP00000002818,ENSMUSP00000002837,ENSMUSP00000003310,ENSMUSP00000003575,ENSMUSP00000003669,ENSMUSP00000003818,ENSMUSP00000003876,ENSMUSP00000004097,…	AI480653,AU040320,AY007814,Abcg1,Abcg2,Abhd14b,Abhd5,Abi2,Acaa2,Ache,Acn9,Acpl2,Acsl3,Acsl4,Actn1,Add3,Adk,Adora1,Adpgk,Agap1,Agbl5,Agpat5,Agxt2l1,Aifm3,Ak2,Ak3,Alas2,Alkbh3,Alkbh8,Alms1,Als2,Als2cl,Amot,Ankrd33,Anp32a,Anpep,Anxa11,Anxa4,Anxa9,Appbp2,Appl1,Arf2,Arf3,Arl8a,Armcx3,Arrdc1,Arrdc3,Asah2,Asah3l,Asph,Astn2,Atcay,Atg5,Atg7,Atg9a,Atic,Atp11c,Atp6v1a,Atxn2l,B4galt5,Bcas3,Bckdhb,Bcl2,Bcl2l1…
GO.0031974	membrane-enclosed lumen	318	3.71e-19	ENSMUSP00000000129,ENSMUSP00000000767,ENSMUSP00000000910,ENSMUSP00000001559,ENSMUSP00000001836,ENSMUSP00000002825,ENSMUSP00000003870,ENSMUSP00000003876,ENSMUSP00000003911,ENSMUSP00000004054,ENSMUSP00000004780,ENSMUSP00000004990,ENSMUSP00000005507,ENSMUSP00000005606,ENSMUSP00000005620,ENSMUSP00000005954,ENSMUSP00000007482,ENSMUSP00000008445,ENSMUSP00000009120,ENSMUSP00000009679,ENSMUSP00000009789,…	Abcg1,Abcg2,Abhd14b,Acn9,Actl6b,Add3,Adk,Ak2,Ak3,Alas2,Alkbh3,Alkbh5,Alkbh8,Anp32a,Anxa11,Appl1,Arid3b,Asf1a,Atrx,Atxn2l,Bahcc1,Baiap2,Banp,Baz1b,Bckdhb,Bcl9l,Bloc1s6,Blzf1,Brcc3,Brd8,Brix1,Brsk1,Camk4,Carm1,Casp8ap2,Cbfa2t3,Cbx4,Ccdc123,Cct4,Cd3eap,Cdk12,Cdkn1a,Cdkn2aip,Cep68,Cfl1,Cfl2,Chchd4,Chchd7,Chtf18,Chuk,Ciapin1,Cirbp,Cmpk1,Cnp,Col4a3bp,Cops7a,Cpsf2,Cpsf6,Crbn,Creb3,Crebrf,Crtc2,Cry1,Cry2…
GO.0043233	organelle lumen	310	4.08e-18	ENSMUSP00000000129,ENSMUSP00000000767,ENSMUSP00000000910,ENSMUSP00000001559,ENSMUSP00000001836,ENSMUSP00000002825,ENSMUSP00000003870,ENSMUSP00000003876,ENSMUSP00000003911,ENSMUSP00000004054,ENSMUSP00000004780,ENSMUSP00000004990,ENSMUSP00000005507,ENSMUSP00000005606,ENSMUSP00000005620,ENSMUSP00000005954,ENSMUSP00000007482,ENSMUSP00000008445,ENSMUSP00000009120,ENSMUSP00000009679,ENSMUSP00000009789,…	Abcg1,Abcg2,Abhd14b,Acn9,Actl6b,Add3,Adk,Ak3,Alas2,Alkbh3,Alkbh5,Alkbh8,Anp32a,Anxa11,Appl1,Arid3b,Asf1a,Atrx,Atxn2l,Bahcc1,Baiap2,Banp,Baz1b,Bckdhb,Bcl9l,Bloc1s6,Blzf1,Brcc3,Brd8,Brix1,Brsk1,Camk4,Carm1,Casp8ap2,Cbfa2t3,Cbx4,Cct4,Cd3eap,Cdk12,Cdkn1a,Cdkn2aip,Cep68,Cfl1,Cfl2,Chtf18,Chuk,Ciapin1,Cirbp,Cmpk1,Cnp,Col4a3bp,Cops7a,Cpsf2,Cpsf6,Crbn,Creb3,Crebrf,Crtc2,Cry1,Cry2,Ctss,Cxxc1,Dact1,Dbh,Dclr…
GO.0070013	intracellular organelle lumen	309	4.08e-18	ENSMUSP00000000129,ENSMUSP00000000767,ENSMUSP00000001559,ENSMUSP00000001836,ENSMUSP00000002825,ENSMUSP00000003870,ENSMUSP00000003876,ENSMUSP00000003911,ENSMUSP00000004054,ENSMUSP00000004780,ENSMUSP00000004990,ENSMUSP00000005507,ENSMUSP00000005606,ENSMUSP00000005620,ENSMUSP00000005954,ENSMUSP00000007482,ENSMUSP00000008445,ENSMUSP00000009120,ENSMUSP00000009679,ENSMUSP00000009789,ENSMUSP00000011981,…	Abcg1,Abcg2,Abhd14b,Acn9,Actl6b,Add3,Adk,Ak3,Alas2,Alkbh3,Alkbh5,Alkbh8,Anp32a,Anxa11,Appl1,Arid3b,Asf1a,Atrx,Atxn2l,Bahcc1,Baiap2,Banp,Baz1b,Bckdhb,Bcl9l,Bloc1s6,Blzf1,Brcc3,Brd8,Brix1,Brsk1,Camk4,Carm1,Casp8ap2,Cbfa2t3,Cbx4,Cct4,Cd3eap,Cdk12,Cdkn1a,Cdkn2aip,Cep68,Cfl1,Cfl2,Chtf18,Chuk,Ciapin1,Cirbp,Cmpk1,Cnp,Col4a3bp,Cops7a,Cpsf2,Cpsf6,Crbn,Creb3,Crebrf,Crtc2,Cry1,Cry2,Ctss,Cxxc1,Dact1,Dclre1a,…
GO.0031981	nuclear lumen	279	2.48e-17	ENSMUSP00000000129,ENSMUSP00000000767,ENSMUSP00000001559,ENSMUSP00000001836,ENSMUSP00000002825,ENSMUSP00000003870,ENSMUSP00000003876,ENSMUSP00000003911,ENSMUSP00000004054,ENSMUSP00000004780,ENSMUSP00000004990,ENSMUSP00000005507,ENSMUSP00000005606,ENSMUSP00000005620,ENSMUSP00000005954,ENSMUSP00000008445,ENSMUSP00000009120,ENSMUSP00000009679,ENSMUSP00000011981,ENSMUSP00000012612,ENSMUSP00000016452,…	Abcg1,Abcg2,Abhd14b,Actl6b,Add3,Adk,Alkbh3,Alkbh5,Alkbh8,Anp32a,Anxa11,Appl1,Arid3b,Asf1a,Atrx,Atxn2l,Bahcc1,Baiap2,Banp,Baz1b,Bcl9l,Bloc1s6,Blzf1,Brcc3,Brd8,Brix1,Brsk1,Camk4,Carm1,Casp8ap2,Cbfa2t3,Cbx4,Cct4,Cd3eap,Cdk12,Cdkn1a,Cdkn2aip,Cep68,Cfl1,Cfl2,Chtf18,Chuk,Ciapin1,Cirbp,Cmpk1,Cnp,Col4a3bp,Cops7a,Cpsf2,Cpsf6,Crbn,Creb3,Crebrf,Crtc2,Cry1,Cry2,Cxxc1,Dact1,Dclre1a,Dcps,Dnajb1,Dnajb4,Dock1,Dp…
GO.0012505	endomembrane system	293	3.39e-17	ENSMUSP00000000632,ENSMUSP00000000641,ENSMUSP00000000910,ENSMUSP00000001187,ENSMUSP00000001507,ENSMUSP00000001547,ENSMUSP00000001569,ENSMUSP00000001836,ENSMUSP00000002572,ENSMUSP00000002818,ENSMUSP00000002837,ENSMUSP00000003818,ENSMUSP00000004097,ENSMUSP00000005606,ENSMUSP00000005798,ENSMUSP00000005815,ENSMUSP00000005954,ENSMUSP00000008684,ENSMUSP00000008907,ENSMUSP00000009789,ENSMUSP00000014892,…	AI480653,AY007814,Abcg1,Ache,Acpl2,Acsl3,Actn1,Adora1,Adpgk,Agpat5,Aifm3,Als2,Anp32a,Anxa11,Anxa4,Ap1g1,Ap2a1,Ap3b1,Apba1,Appl1,Arf2,Arf3,Arf4,Arl8a,Arrdc3,Asah3l,Asph,Astn2,Atg9a,Atp11c,Atp1a2,B4galt5,Baiap2,Bcl2,Bloc1s6,Bmp1,Cabp1,Camkmt,Casc4,Cbfa2t3,Ccdc88a,Cdc42ep4,Cds1,Ckap4,Cln8,Cntnap2,Col1a1,Col4a3bp,Copg2,Cotl1,Creb3,Csgalnact2,Ctdnep1,Ctss,Cux1,Cyb5r3,Cyp51,Cyp7b1,Dbh,Derl1,Dhcr24,Dnaj…
GO.0005654	nucleoplasm	226	1.2e-14	ENSMUSP00000000767,ENSMUSP00000001559,ENSMUSP00000003876,ENSMUSP00000003911,ENSMUSP00000004054,ENSMUSP00000004780,ENSMUSP00000004990,ENSMUSP00000005507,ENSMUSP00000005606,ENSMUSP00000005954,ENSMUSP00000008445,ENSMUSP00000009120,ENSMUSP00000009679,ENSMUSP00000011981,ENSMUSP00000012612,ENSMUSP00000017629,ENSMUSP00000018556,ENSMUSP00000018691,ENSMUSP00000020227,ENSMUSP00000020461,ENSMUSP00000020513,…	Abcg1,Abcg2,Add3,Adk,Alkbh3,Alkbh5,Alkbh8,Anxa11,Appl1,Arid3b,Atrx,Atxn2l,Bahcc1,Baiap2,Banp,Bcl9l,Bloc1s6,Blzf1,Brcc3,Brd8,Brsk1,Camk4,Carm1,Casp8ap2,Cbfa2t3,Cbx4,Cct4,Cdk12,Cdkn1a,Cdkn2aip,Cep68,Chtf18,Chuk,Ciapin1,Cirbp,Cmpk1,Cnp,Col4a3bp,Cops7a,Cpsf2,Cpsf6,Creb3,Crebrf,Crtc2,Cry1,Cry2,Cxxc1,Dact1,Dcps,Dnajb4,Dock1,Dph3,Dusp4,Eid2,Elf1,Eny2,Ercc4,Ezh1,Faap20,Fam63a,Fam63b,Fancb,Fbxl3,Fbxw7,Fdp…
GO.0043232	intracellular non-membrane-bounded organelle	298	3.47e-14	ENSMUSP00000000001,ENSMUSP00000000129,ENSMUSP00000000767,ENSMUSP00000001569,ENSMUSP00000001592,ENSMUSP00000001675,ENSMUSP00000001836,ENSMUSP00000002572,ENSMUSP00000003575,ENSMUSP00000003870,ENSMUSP00000003876,ENSMUSP00000004294,ENSMUSP00000004330,ENSMUSP00000004990,ENSMUSP00000005077,ENSMUSP00000005606,ENSMUSP00000005620,ENSMUSP00000007482,ENSMUSP00000008445,ENSMUSP00000009120,ENSMUSP00000009157,…	Abhd14b,Abhd5,Abi2,Acsl3,Acsl4,Actl6b,Actn1,Add3,Agbl5,Alkbh8,Alms1,Als2,Amot,Anxa11,Appbp2,Arl8a,Asf1a,Atrx,Atxn2l,Bahcc1,Baiap2,Bcas3,Bcl2l11,Bcl6,Bcl9l,Brd8,Brix1,Brsk1,Cabp1,Camk2n2,Camk4,Capzb,Cbfa2t3,Ccdc123,Ccdc28b,Ccdc77,Ccnb2,Cct4,Cd3eap,Cdc42ep4,Cdk12,Cdkn2aip,Cep68,Cfl1,Ciapin1,Cirbp,Ckap4,Cmpk1,Cnot3,Cnot7,Cnp,Cotl1,Crbn,Csrp1,Ctnna2,Ctnna3,Cttnbp2nl,Cyb5r3,Daam1,Dclre1a,Dctn5,Dhcr24,…
GO.0031090	organelle membrane	244	6.36e-14	ENSMUSP00000000001,ENSMUSP00000000632,ENSMUSP00000000642,ENSMUSP00000000910,ENSMUSP00000001187,ENSMUSP00000001507,ENSMUSP00000001569,ENSMUSP00000002818,ENSMUSP00000002837,ENSMUSP00000003310,ENSMUSP00000003818,ENSMUSP00000004097,ENSMUSP00000004560,ENSMUSP00000005798,ENSMUSP00000008907,ENSMUSP00000009727,ENSMUSP00000014892,ENSMUSP00000016678,ENSMUSP00000017332,ENSMUSP00000018186,ENSMUSP00000018625,…	AI480653,AY007814,Abcg2,Acaa2,Acpl2,Acsl3,Acsl4,Actn1,Agpat5,Aifm3,Ak2,Alas2,Anpep,Anxa4,Ap1g1,Ap3b1,Appbp2,Appl1,Arl8a,Armcx3,Asah3l,Asph,Atcay,Atg5,Atg9a,Atp11c,Atp6v1a,B4galt5,Bckdhb,Bcl2,Bid,Blzf1,Cabp1,Cacfd1,Cbfa2t3,Ccz1,Cds1,Chchd6,Chmp3,Ckap4,Cln8,Clta,Cnp,Coa3,Copg2,Coq10b,Cotl1,Creb3,Csgalnact2,Ctdnep1,Cux1,Cyb5r3,Cyp51,Cyp7b1,Dbh,Derl1,Dhcr24,Dnm2,Dysf,Ehd3,Eif5a2,Elovl6,Emc6,Eral1,Erc…
GO.0032991	macromolecular complex	353	1.47e-13	ENSMUSP00000000001,ENSMUSP00000000129,ENSMUSP00000000767,ENSMUSP00000001547,ENSMUSP00000001548,ENSMUSP00000001592,ENSMUSP00000001757,ENSMUSP00000001920,ENSMUSP00000002683,ENSMUSP00000002818,ENSMUSP00000002825,ENSMUSP00000003351,ENSMUSP00000003575,ENSMUSP00000003818,ENSMUSP00000003876,ENSMUSP00000003911,ENSMUSP00000004294,ENSMUSP00000004330,ENSMUSP00000004378,ENSMUSP00000005077,ENSMUSP00000005507,…	Abcg8,Abi2,Acr,Actl6b,Aif1l,Als2,Anapc10,Anapc15,Anapc5,Ap1g1,Ap3b1,Apba1,Appbp2,Appl1,Arnt,Asf1a,Atg5,Atp1a2,Atp6v1a,Atrx,Atxn2l,Bahcc1,Baz1b,Bcas3,Bckdhb,Bcl2,Brcc3,Brd8,C77370,Cabp1,Cacnb2,Cacul1,Capzb,Casp3,Cbx4,Ccdc123,Ccdc97,Ccnd3,Ccny,Cct4,Cd3eap,Cdk12,Cdkn1a,Chmp3,Chuk,Cirbp,Clta,Cnot3,Cnot6,Cnot6l,Cnot7,Cnp,Cntnap2,Col1a1,Copg2,Cops2,Cops7a,Cpeb3,Cplx2,Cpsf2,Cpsf6,Crbn,Crem,Ctdnep1,Ctnnb…
GO.0016020	membrane	562	2.04e-13	ENSMUSP00000000129,ENSMUSP00000000365,ENSMUSP00000000632,ENSMUSP00000000641,ENSMUSP00000000642,ENSMUSP00000000910,ENSMUSP00000001115,ENSMUSP00000001187,ENSMUSP00000001256,ENSMUSP00000001507,ENSMUSP00000001548,ENSMUSP00000001569,ENSMUSP00000001592,ENSMUSP00000001675,ENSMUSP00000001824,ENSMUSP00000001920,ENSMUSP00000002572,ENSMUSP00000002818,ENSMUSP00000002837,ENSMUSP00000003351,ENSMUSP00000003575,…	AI480653,AI597468,AU040320,AY007814,Abcg1,Abcg2,Abcg8,Abi2,Acaa2,Accn1,Accn2,Ache,Acpl2,Acsl3,Acsl4,Actn1,Adcy1,Adcy9,Add3,Adp,Adpgk,Adrbk1,Agfg2,Agpat5,Aif1l,Aifm3,Ak2,Alas2,Als2,Amot,Anpep,Anxa11,Anxa4,Aplnr,Aplp2,Appbp2,Appl1,Arhgap33,Arhgef1,Arl8a,Armcx3,Arrdc1,Arrdc3,Asah2,Asah3l,Asph,Astn2,Atcay,Atg5,Atg9a,Atic,Atp11c,Atp1a2,Atxn2l,B4galt5,BC018242,Bai1,Baiap2,Bambi,Bcan,Bckdhb,Bcl2,Bcl2l11…
GO.0098588	bounding membrane of organelle	195	6.54e-13	ENSMUSP00000000001,ENSMUSP00000000642,ENSMUSP00000000910,ENSMUSP00000001507,ENSMUSP00000001569,ENSMUSP00000002818,ENSMUSP00000002837,ENSMUSP00000003818,ENSMUSP00000004097,ENSMUSP00000005798,ENSMUSP00000008684,ENSMUSP00000008907,ENSMUSP00000009727,ENSMUSP00000014892,ENSMUSP00000016678,ENSMUSP00000018186,ENSMUSP00000018691,ENSMUSP00000019439,ENSMUSP00000019937,ENSMUSP00000020023,ENSMUSP00000020251,…	AI480653,AY007814,Acpl2,Acsl3,Acsl4,Actn1,Agpat5,Anpep,Ap1g1,Ap3b1,Appl1,Arl8a,Armcx3,Asah3l,Asph,Atg5,Atg9a,Atp11c,Atp6v1a,B4galt5,Bcl2,Blzf1,Cabp1,Cbfa2t3,Ccz1,Cds1,Chmp3,Ckap4,Cln8,Clta,Cnp,Copg2,Creb3,Csgalnact2,Ctdnep1,Cux1,Cyb5r3,Cyp51,Cyp7b1,Dbh,Derl1,Dhcr24,Dnm2,Ehd3,Eif5a2,Elovl6,Emc6,Erc1,Exoc3,Extl1,Fads2,Fam57b,Far1,Fkbp14,Fkbp4,Fkbp5,Fkrp,Flot1,Fndc5,Gcnt2,Gnai1,Gnai3,Gnpnat1,Gnptab,…
GO.0043234	protein complex	305	6.61e-12	ENSMUSP00000000001,ENSMUSP00000000767,ENSMUSP00000001547,ENSMUSP00000001548,ENSMUSP00000001592,ENSMUSP00000001757,ENSMUSP00000001920,ENSMUSP00000002818,ENSMUSP00000003351,ENSMUSP00000003575,ENSMUSP00000003818,ENSMUSP00000003876,ENSMUSP00000003911,ENSMUSP00000004294,ENSMUSP00000004330,ENSMUSP00000004378,ENSMUSP00000005077,ENSMUSP00000005507,ENSMUSP00000005798,ENSMUSP00000009679,ENSMUSP00000009789,…	Abcg8,Abi2,Acr,Actl6b,Aif1l,Als2,Anapc10,Anapc15,Anapc5,Ap1g1,Ap3b1,Apba1,Appbp2,Appl1,Arnt,Asf1a,Atg5,Atp1a2,Atp6v1a,Atrx,Bahcc1,Bcas3,Bckdhb,Bcl2,Brcc3,Brd8,C77370,Cabp1,Cacnb2,Cacul1,Capzb,Casp3,Cbx4,Ccdc123,Ccnd3,Ccny,Cct4,Cd3eap,Cdk12,Cdkn1a,Chmp3,Chuk,Clta,Cnot3,Cnot6,Cnot6l,Cnot7,Cnp,Cntnap2,Col1a1,Copg2,Cops2,Cops7a,Cpeb3,Cplx2,Cpsf2,Cpsf6,Crbn,Crem,Ctdnep1,Ctnnbip1,Cxxc1,Dact1,Dctn5,Derl…
GO.0005783	endoplasmic reticulum	140	1.66e-09	ENSMUSP00000000641,ENSMUSP00000001507,ENSMUSP00000001547,ENSMUSP00000002818,ENSMUSP00000002837,ENSMUSP00000003818,ENSMUSP00000008684,ENSMUSP00000009789,ENSMUSP00000014892,ENSMUSP00000016696,ENSMUSP00000018186,ENSMUSP00000018691,ENSMUSP00000019439,ENSMUSP00000019937,ENSMUSP00000020023,ENSMUSP00000020285,ENSMUSP00000020340,ENSMUSP00000020400,ENSMUSP00000020546,ENSMUSP00000021329,ENSMUSP00000021347,…	AI480653,AY007814,Acsl3,Adora1,Adpgk,Agpat5,Aifm3,Anp32a,Asph,Atp11c,Bcl2,Ccdc88a,Cds1,Ckap4,Cln8,Col1a1,Col4a3bp,Creb3,Ctdnep1,Cyb5r3,Cyp51,Cyp7b1,Derl1,Dhcr24,Dnaja1,Eif5a2,Elovl6,Emc6,Extl1,Fads2,Fam57b,Fbxw7,Fgfr3,Fkbp14,Fkbp4,Fkbp5,Fkrp,Fndc5,Foxred2,Glul,Gosr2,Gpsm1,Hax1,Herpud1,Hhatl,Hsd17b12,Hspa13,Hspa5,Inf2,Insig2,Jph4,Kcnj11,Lass6,Leprel2,Lnp,Lrrtm1,Ltc4s,Man1b1,Mest,Mfsd2a,Mgst1,Mlec,…
GO.0005856	cytoskeleton	162	1.68e-08	ENSMUSP00000000001,ENSMUSP00000000129,ENSMUSP00000001569,ENSMUSP00000001592,ENSMUSP00000001675,ENSMUSP00000003575,ENSMUSP00000004294,ENSMUSP00000004330,ENSMUSP00000004990,ENSMUSP00000005077,ENSMUSP00000005606,ENSMUSP00000009157,ENSMUSP00000018625,ENSMUSP00000020023,ENSMUSP00000020775,ENSMUSP00000020904,ENSMUSP00000021183,ENSMUSP00000021554,ENSMUSP00000021689,ENSMUSP00000022115,ENSMUSP00000022416,…	Abi2,Actn1,Add3,Agbl5,Alkbh8,Alms1,Als2,Amot,Anxa11,Appbp2,Arl8a,Baiap2,Bcas3,Bcl2l11,Brsk1,Cabp1,Camk2n2,Capzb,Ccdc123,Ccdc28b,Ccdc77,Ccnb2,Cct4,Cdc42ep4,Cep68,Cfl1,Ckap4,Cnp,Cotl1,Csrp1,Ctnna2,Ctnna3,Cttnbp2nl,Daam1,Dctn5,Dhcr24,Dnm1,Dynll1,Dynll2,Dynlt3,Eral1,Esrra,Evl,Fbf1,Fbxo31,Fbxw11,Fer,Fkbp4,Flot1,Fnbp1,Fntb,Frmd5,Frmd6,Gcap14,Gfap,Gnai1,Gnai3,Gng12,Gphn,Gtf2e1,Hax1,Hid1,Hook2,Hspb1,Ikbk…
GO.1902494	catalytic complex	94	1.28e-07	ENSMUSP00000000001,ENSMUSP00000003876,ENSMUSP00000004330,ENSMUSP00000004378,ENSMUSP00000009157,ENSMUSP00000009789,ENSMUSP00000016452,ENSMUSP00000018333,ENSMUSP00000018556,ENSMUSP00000020657,ENSMUSP00000020775,ENSMUSP00000021447,ENSMUSP00000022038,ENSMUSP00000022597,ENSMUSP00000022720,ENSMUSP00000022993,ENSMUSP00000023206,ENSMUSP00000023813,ENSMUSP00000023829,ENSMUSP00000025444,ENSMUSP00000026032,…	Abcg8,Anapc10,Anapc15,Anapc5,Appl1,Atp1a2,Bckdhb,Brcc3,Brd8,C77370,Cacul1,Cbx4,Ccnd3,Ccny,Cd3eap,Cdk12,Cdkn1a,Crbn,Ctdnep1,Cxxc1,Derl1,Dna2,Dnaja1,Dynll1,Dynll2,Dynlt3,Eno2,Eny2,Erc1,Ercc4,Ercc8,Ezh1,Fbxl3,Fbxo31,Fbxw11,Fbxw7,Fntb,Gclm,Gnai1,Gnai3,Gnao1,Gng12,Ikbkg,Ints12,Ints6,Ints8,Kansl1,Meaf6,Med21,Morf4l1,Msl1,Naa16,Naa30,Naa35,Ncf1,Nck1,Ndufab1,Ndufc2,Ogt,P4ha1,PAGR1,Pcgf6,Pdk2,Phf21a,Pigk,…
GO.0005794	Golgi apparatus	118	3.21e-07	ENSMUSP00000000001,ENSMUSP00000001547,ENSMUSP00000001836,ENSMUSP00000002818,ENSMUSP00000002837,ENSMUSP00000004097,ENSMUSP00000005606,ENSMUSP00000008907,ENSMUSP00000014892,ENSMUSP00000020251,ENSMUSP00000020285,ENSMUSP00000020391,ENSMUSP00000020546,ENSMUSP00000020938,ENSMUSP00000021090,ENSMUSP00000021329,ENSMUSP00000021574,ENSMUSP00000022196,ENSMUSP00000022429,ENSMUSP00000022693,ENSMUSP00000022765,…	Abcg1,Ache,Acpl2,Acr,Acsl3,Ap1g1,Ap3b1,Apba1,Arf2,Arf3,Arf4,Asah3l,Atg9a,B4galt5,Bmp1,Cabp1,Camkmt,Casc4,Cbfa2t3,Ccdc88a,Clta,Cntnap2,Col1a1,Col4a3bp,Copg2,Creb3,Csgalnact2,Cux1,Dhcr24,Erc1,Fam20a,Fam57b,Fbxw7,Fgf7,Fgfr3,Fkrp,Fv1,Gcc2,Gcnt2,Gla,Gnai3,Gnpnat1,Gnptab,Gosr2,Gpr89,Gpsm1,Grb2,Gtpbp4,Hid1,Ica1,Kbtbd8,Lap3,Ldlr,Leprot,Lig1,Man1a2,Map4k2,Mapkap1,Mapre1,Mgat4b,Mink1,Mmp24,Mob4,Myo18a,Ndst…
GO.0005829	cytosol	153	7.02e-07	ENSMUSP00000000335,ENSMUSP00000000642,ENSMUSP00000001559,ENSMUSP00000001592,ENSMUSP00000002818,ENSMUSP00000003669,ENSMUSP00000004330,ENSMUSP00000004378,ENSMUSP00000004560,ENSMUSP00000004990,ENSMUSP00000005507,ENSMUSP00000005606,ENSMUSP00000005620,ENSMUSP00000005954,ENSMUSP00000009157,ENSMUSP00000015846,ENSMUSP00000017629,ENSMUSP00000018186,ENSMUSP00000018333,ENSMUSP00000020227,ENSMUSP00000020308,…	Abhd14b,Abhd5,Abi2,Adk,Agap1,Agbl5,Alkbh8,Als2,Ankrd33,Anxa9,Appl1,Atg5,Atg7,Atp1a2,Atp6v1a,Baiap2,Bcl2,Bcl2l11,Bid,Bloc1s6,Cabp1,Camk2n2,Carm1,Casp3,Ccdc123,Ccdc88a,Cct4,Cdkn1a,Cfl1,Chmp3,Col4a3bp,Comt,Copg2,Cplx2,Creb3,Cry1,Cry2,Ctnnbip1,Cyb5r3,Ddit4,Dhcr24,Dnaja1,Dnaja4,Dnajb1,Dnajb4,Dnm2,Dusp23,Dynll1,Eno2,Erc1,Errfi1,Fam72a,Fbxl3,Fbxw11,Fgf14,Fkbp4,Fmnl1,Gapvd1,Gimap6,Gjb6,Gmps,Gpsm1,Gpx2,Gr…
GO.0005789	endoplasmic reticulum membrane	86	1.12e-06	ENSMUSP00000001507,ENSMUSP00000002837,ENSMUSP00000003818,ENSMUSP00000008684,ENSMUSP00000014892,ENSMUSP00000018186,ENSMUSP00000018691,ENSMUSP00000019439,ENSMUSP00000019937,ENSMUSP00000020023,ENSMUSP00000021329,ENSMUSP00000021347,ENSMUSP00000021676,ENSMUSP00000022765,ENSMUSP00000022819,ENSMUSP00000022993,ENSMUSP00000025567,ENSMUSP00000026409,ENSMUSP00000027053,ENSMUSP00000027554,ENSMUSP00000028222,…	AI480653,Acsl3,Agpat5,Asph,Atp11c,Bcl2,Cds1,Ckap4,Cln8,Creb3,Ctdnep1,Cyb5r3,Cyp51,Cyp7b1,Derl1,Dhcr24,Eif5a2,Elovl6,Emc6,Extl1,Fads2,Fam57b,Fkbp14,Fkbp4,Fkbp5,Furin,Gosr2,Gpsm1,Herpud1,Hhatl,Hsd17b12,Hspa5,Insig2,Jph4,Lass6,Lnp,Ltc4s,Man1b1,Mest,Mfsd2a,Mgst1,Mlec,Nat8l,ORF11,Ormdl2,Pcyt1a,Pgap1,Pi4kb,Pigk,Pigo,Pip4k2b,Pitpnm1,Porcn,Ptpla,Ptplb,Rab2a,Rab2b,Rdh10,Rdh11,Reep2,Reep3,Rnf121,Rpn2,Sc5d,…
GO.0042175	nuclear outer membrane-endoplasmic reticulum membrane network	87	1.37e-06	ENSMUSP00000001507,ENSMUSP00000002837,ENSMUSP00000003818,ENSMUSP00000008684,ENSMUSP00000014892,ENSMUSP00000018186,ENSMUSP00000018691,ENSMUSP00000019439,ENSMUSP00000019937,ENSMUSP00000020023,ENSMUSP00000021329,ENSMUSP00000021347,ENSMUSP00000021676,ENSMUSP00000022765,ENSMUSP00000022819,ENSMUSP00000022993,ENSMUSP00000025567,ENSMUSP00000026409,ENSMUSP00000027053,ENSMUSP00000027554,ENSMUSP00000028222,…	AI480653,Acsl3,Agpat5,Asph,Atp11c,Bcl2,Cds1,Ckap4,Cln8,Creb3,Ctdnep1,Cyb5r3,Cyp51,Cyp7b1,Derl1,Dhcr24,Eif5a2,Elovl6,Emc6,Extl1,Fads2,Fam57b,Fkbp14,Fkbp4,Fkbp5,Furin,Gosr2,Gpsm1,Herpud1,Hhatl,Hsd17b12,Hspa5,Insig2,Jph4,Lass6,Lnp,Ltc4s,Man1b1,Mest,Mfsd2a,Mgst1,Mlec,Nat8l,Nav3,ORF11,Ormdl2,Pcyt1a,Pgap1,Pi4kb,Pigk,Pigo,Pip4k2b,Pitpnm1,Porcn,Ptpla,Ptplb,Rab2a,Rab2b,Rdh10,Rdh11,Reep2,Reep3,Rnf121,Rpn2,…
GO.0015630	microtubule cytoskeleton	99	1.38e-06	ENSMUSP00000000001,ENSMUSP00000000129,ENSMUSP00000001569,ENSMUSP00000004294,ENSMUSP00000004330,ENSMUSP00000004990,ENSMUSP00000005077,ENSMUSP00000005606,ENSMUSP00000009157,ENSMUSP00000018625,ENSMUSP00000020023,ENSMUSP00000020775,ENSMUSP00000020904,ENSMUSP00000022115,ENSMUSP00000022416,ENSMUSP00000022531,ENSMUSP00000022595,ENSMUSP00000022701,ENSMUSP00000024869,ENSMUSP00000025642,ENSMUSP00000025729,…	Agbl5,Alkbh8,Alms1,Als2,Anxa11,Appbp2,Arl8a,Bcas3,Bcl2l11,Brsk1,Camk2n2,Ccdc123,Ccdc28b,Ccdc77,Ccnb2,Cct4,Cdc42ep4,Cep68,Cnp,Dctn5,Dnm1,Dynll1,Dynll2,Dynlt3,Esrra,Fbf1,Fbxo31,Fbxw11,Fer,Fkbp4,Flot1,Fntb,Gcap14,Gnai1,Gnai3,Hid1,Hook2,Hspb1,Ikbkg,Irs1,Kbtbd8,Kif1b,Kifc2,Klc2,Krit1,Lats2,Lrrcc1,Mapk14,Mast2,Meaf6,Mid2,Mkks,Mt3,Mtap4,Mtus2,Mycbp,Ndn,Neil1,Nek7,Nfe2l2,Nicn1,Nme1,Nudt21,Ogt,Ola1,Pla2g6…
GO.1990234	transferase complex	66	1.45e-06	ENSMUSP00000003876,ENSMUSP00000004330,ENSMUSP00000016452,ENSMUSP00000018556,ENSMUSP00000020657,ENSMUSP00000022038,ENSMUSP00000022597,ENSMUSP00000022720,ENSMUSP00000022993,ENSMUSP00000023206,ENSMUSP00000023829,ENSMUSP00000025444,ENSMUSP00000026032,ENSMUSP00000026665,ENSMUSP00000026973,ENSMUSP00000028914,ENSMUSP00000028964,ENSMUSP00000029650,ENSMUSP00000030118,ENSMUSP00000032279,ENSMUSP00000032429,…	Anapc10,Anapc15,Anapc5,Brcc3,Brd8,C77370,Cacul1,Cbx4,Ccnd3,Ccny,Cd3eap,Cdk12,Cdkn1a,Crbn,Cxxc1,Derl1,Dna2,Dnaja1,Eny2,Erc1,Ercc4,Ercc8,Ezh1,Fbxl3,Fbxo31,Fbxw11,Fbxw7,Fntb,Ikbkg,Ints12,Ints6,Ints8,Kansl1,Meaf6,Med21,Morf4l1,Msl1,Naa16,Naa30,Naa35,Ogt,PAGR1,Pcgf6,Pik3c2a,Pik3cb,Pik3r6,Pole4,Polr2a,Polr3f,Polr3k,Prkar1b,Rabggtb,Rapgef4,Rbck1,Rpn2,Rprd2,Skp1a,Skp2,Spcs2,Stt3a,Ube2a,Ube2b,Ube2d2a,Ube2…
GO.0005739	mitochondrion	145	1.72e-06	ENSMUSP00000000335,ENSMUSP00000000642,ENSMUSP00000001884,ENSMUSP00000002818,ENSMUSP00000003310,ENSMUSP00000003876,ENSMUSP00000004560,ENSMUSP00000004990,ENSMUSP00000005606,ENSMUSP00000007482,ENSMUSP00000008684,ENSMUSP00000009157,ENSMUSP00000009789,ENSMUSP00000012612,ENSMUSP00000017332,ENSMUSP00000018186,ENSMUSP00000019721,ENSMUSP00000020227,ENSMUSP00000020308,ENSMUSP00000020339,ENSMUSP00000020580,…	Abcg1,Abcg2,Acaa2,Acn9,Acsl3,Acsl4,Agpat5,Agxt2l1,Aifm3,Ak2,Ak3,Alas2,Alkbh3,Armcx3,Asah2,Atcay,Atic,Atp6v1a,Bckdhb,Bcl2,Bcl2l11,Bid,Brd8,Casp8ap2,Ccdc123,Cd3eap,Cecr5,Chchd4,Chchd6,Chchd7,Ciapin1,Cln8,Clpb,Cnp,Coa3,Coa5,Coa6,Col4a3bp,Comt,Coq10b,Cry1,Cry2,Cyb5r3,Dcps,Ddit4,Depp,Dnaja1,Dnajc27,Dynll1,Eral1,Exog,Fam210a,Fam72a,Fastkd5,Fbxw7,Fdps,Fkbp4,Glul,Gprc5c,Gpt2,Grpel1,Grpel2,Hax1,Hcfc1,Hk2,…
GO.0044430	cytoskeletal part	116	3e-06	ENSMUSP00000000001,ENSMUSP00000001569,ENSMUSP00000001592,ENSMUSP00000001920,ENSMUSP00000003575,ENSMUSP00000004294,ENSMUSP00000004330,ENSMUSP00000004990,ENSMUSP00000005077,ENSMUSP00000005606,ENSMUSP00000009157,ENSMUSP00000018625,ENSMUSP00000020023,ENSMUSP00000020775,ENSMUSP00000020904,ENSMUSP00000021554,ENSMUSP00000022115,ENSMUSP00000022416,ENSMUSP00000022531,ENSMUSP00000022595,ENSMUSP00000022701,…	Actn1,Agbl5,Aif1l,Alms1,Als2,Amot,Anxa11,Appbp2,Arl8a,Bcas3,Bcl2l11,Brsk1,Camk2n2,Capzb,Ccdc123,Ccdc28b,Ccdc77,Ccnb2,Cct4,Cep68,Cfl1,Cnp,Daam1,Dctn5,Dnm1,Dynll1,Dynll2,Dynlt3,Fbf1,Fbxo31,Fbxw11,Fkbp4,Flot1,Fntb,Gfap,Gnai1,Gnai3,Gng12,Hid1,Hook2,Hspb1,Ikbkg,Ina,Irs1,Jup,Kbtbd8,Kif1b,Kifc2,Klc2,Krit1,Krtap12-1,Lasp1,Lats2,Lrrcc1,Mapk14,Meaf6,Med28,Mid2,Mkks,Mt3,Mtap4,Mtus2,Myadm,Mycbp,Myo18a,Ndn,Ne…
GO.0016023	cytoplasmic membrane-bounded vesicle	91	6.26e-06	ENSMUSP00000000001,ENSMUSP00000000910,ENSMUSP00000001547,ENSMUSP00000001569,ENSMUSP00000002818,ENSMUSP00000005798,ENSMUSP00000005815,ENSMUSP00000005954,ENSMUSP00000009727,ENSMUSP00000014892,ENSMUSP00000015460,ENSMUSP00000016678,ENSMUSP00000018625,ENSMUSP00000020340,ENSMUSP00000021329,ENSMUSP00000021554,ENSMUSP00000021676,ENSMUSP00000021714,ENSMUSP00000022196,ENSMUSP00000022416,ENSMUSP00000023486,…	AY007814,Actn1,Als2cl,Amot,Anxa11,Ap1g1,Ap2a1,Ap3b1,Apba1,Appbp2,Baiap2,Bloc1s6,Brsk1,Cacfd1,Ccdc88a,Cct4,Chic1,Chmp3,Clta,Cnp,Col1a1,Copg2,Cttnbp2,Dbh,Dnm2,Dysf,Ehd3,Eppin,Exoc3,Fgfr3,Flot1,Fmnl1,Fnbp1,Furin,Gnai3,Gosr2,Gpr89,Hax1,Hspa5,Ica1,Kif1b,Kit,Lamp2,Lnpep,Mapkap1,Mmp14,Mt3,ORF11,Pcsk4,Pcsk5,Pdpk1,Pi4k2a,Pik3c2a,Plat,Ppt1,Rab2a,Rab3c,Rabep1,Rph3a,Scamp2,Slamf1,Slc18a2,Snx17,Snx6,Sppl2b,Sp…
GO.0044432	endoplasmic reticulum part	91	1.03e-05	ENSMUSP00000001507,ENSMUSP00000002837,ENSMUSP00000003818,ENSMUSP00000008684,ENSMUSP00000009789,ENSMUSP00000014892,ENSMUSP00000016696,ENSMUSP00000018186,ENSMUSP00000018691,ENSMUSP00000019439,ENSMUSP00000019937,ENSMUSP00000020023,ENSMUSP00000020340,ENSMUSP00000021329,ENSMUSP00000021347,ENSMUSP00000021676,ENSMUSP00000022377,ENSMUSP00000022765,ENSMUSP00000022819,ENSMUSP00000022993,ENSMUSP00000025567,…	AI480653,Acsl3,Agpat5,Asph,Atp11c,Bcl2,Cds1,Ckap4,Cln8,Creb3,Ctdnep1,Cyb5r3,Cyp51,Cyp7b1,Derl1,Dhcr24,Eif5a2,Elovl6,Emc6,Extl1,Fads2,Fam57b,Fkbp14,Fkbp4,Fkbp5,Foxred2,Gosr2,Gpsm1,Herpud1,Hhatl,Hsd17b12,Hspa5,Insig2,Jph4,Lass6,Lnp,Ltc4s,Man1b1,Mest,Mfsd2a,Mgst1,Mlec,Nat8l,ORF11,Ormdl2,P4ha1,Pcsk4,Pcsk5,Pcyt1a,Pgap1,Pi4kb,Pigh,Pigk,Pigo,Pip4k2b,Pitpnm1,Porcn,Ptpla,Ptplb,Rab2a,Rab2b,Rdh10,Rdh11,Reep…
GO.0030054	cell junction	103	1.3e-05	ENSMUSP00000000129,ENSMUSP00000001548,ENSMUSP00000001569,ENSMUSP00000001592,ENSMUSP00000001920,ENSMUSP00000002572,ENSMUSP00000003351,ENSMUSP00000003575,ENSMUSP00000003669,ENSMUSP00000005077,ENSMUSP00000005815,ENSMUSP00000009727,ENSMUSP00000015855,ENSMUSP00000020400,ENSMUSP00000021090,ENSMUSP00000021554,ENSMUSP00000021689,ENSMUSP00000021714,ENSMUSP00000022115,ENSMUSP00000023072,ENSMUSP00000023087,…	Abi2,Ache,Actn1,Add3,Aif1l,Amot,Atcay,Atp1a2,Brsk1,Bves,Capzb,Cdh13,Cep68,Cfl1,Cplx2,Csrp1,Ctnna2,Ctnna3,Dact1,Dnm2,Dtna,Ehd3,Evl,Faap20,Faim2,Fbf1,Fer,Flot1,Frmd6,Gphn,Grb2,Grid1,Grid2,Grin2c,Homer1,Homer3,Hspa5,Hspb1,Ica1,Iglon5,Itga3,Jam2,Jup,Kazn,Kcnj11,Kit,Krit1,Lap3,Lasp1,Lgi1,Lig4,Lpp,Lrrtm1,Lrrtm2,Lrrtm4,Lsamp,Magi1,Mast2,Mink1,Mmp14,Mrc2,Mtss1,Myadm,Nck1,Nelf,Nlgn2,Palld,Parvb,Pdpk1,Pi4k…
GO.0097458	neuron part	101	1.74e-05	ENSMUSP00000000335,ENSMUSP00000001548,ENSMUSP00000003351,ENSMUSP00000003669,ENSMUSP00000004054,ENSMUSP00000004378,ENSMUSP00000005606,ENSMUSP00000008445,ENSMUSP00000020400,ENSMUSP00000021045,ENSMUSP00000021514,ENSMUSP00000021802,ENSMUSP00000022429,ENSMUSP00000022819,ENSMUSP00000023509,ENSMUSP00000023758,ENSMUSP00000023759,ENSMUSP00000025110,ENSMUSP00000025830,ENSMUSP00000025999,ENSMUSP00000026436,…	Abi2,Accn1,Accn2,Acsl4,Actl6b,Add3,Apba1,Arf4,Atcay,Atp1a2,Baiap2,Bcan,Brsk1,Cabp1,Cacfd1,Cap2,Cdh13,Cntn2,Cntnap2,Comt,Cpeb3,Cplx2,Creb3,Ctnna2,Dcc,Dclk1,Dnm1,Dpf3,Eno2,Epn1,Erc1,Fbxo31,Fkbp15,Glul,Gnao1,Gprin1,Grid1,Grid2,Grin2c,Herpud1,Homer1,Homer3,Ica1,Iglon5,Itga3,Jph4,Kcnc1,Kcnj11,Kif1b,Klc2,Klhl24,Kpna1,Lrrtm1,Lsamp,Mgll,Mink1,Mob2,Mob4,Mtap4,Ncmap,Nelf,Nell2,Nlgn2,Osbp2,Pdpk1,Phax,Pias3,…
GO.0031410	cytoplasmic vesicle	96	2.24e-05	ENSMUSP00000000001,ENSMUSP00000000910,ENSMUSP00000001547,ENSMUSP00000001569,ENSMUSP00000002818,ENSMUSP00000005798,ENSMUSP00000005815,ENSMUSP00000005954,ENSMUSP00000009727,ENSMUSP00000014892,ENSMUSP00000015460,ENSMUSP00000016678,ENSMUSP00000018625,ENSMUSP00000020340,ENSMUSP00000021329,ENSMUSP00000021554,ENSMUSP00000021676,ENSMUSP00000021714,ENSMUSP00000022196,ENSMUSP00000022416,ENSMUSP00000023486,…	AU040320,AY007814,Actn1,Als2cl,Amot,Anxa11,Ap1g1,Ap2a1,Ap3b1,Apba1,Appbp2,Arrdc1,Atg9a,Baiap2,Bloc1s6,Brsk1,Cacfd1,Ccdc88a,Cct4,Chic1,Chmp3,Clta,Cnp,Col1a1,Copg2,Cttnbp2,Dbh,Dnm2,Dysf,Ehd3,Eppin,Exoc3,Fgfr3,Flot1,Fmnl1,Fnbp1,Furin,Gnai3,Gosr2,Gpr89,Hax1,Hspa5,Ica1,Kif1b,Kit,Lamp2,Lnpep,Mapkap1,Mmp14,Mt3,ORF11,Pcsk4,Pcsk5,Pdpk1,Pik3c2a,Plat,Ppt1,Rab2a,Rab3c,Rabep1,Rph3a,Scamp2,Slamf1,Slc18a2,Snx17…
GO.0044451	nucleoplasm part	69	2.24e-05	ENSMUSP00000000767,ENSMUSP00000003876,ENSMUSP00000008445,ENSMUSP00000012259,ENSMUSP00000018556,ENSMUSP00000020681,ENSMUSP00000022701,ENSMUSP00000023206,ENSMUSP00000025444,ENSMUSP00000025642,ENSMUSP00000026665,ENSMUSP00000028761,ENSMUSP00000028914,ENSMUSP00000029650,ENSMUSP00000029950,ENSMUSP00000030348,ENSMUSP00000030623,ENSMUSP00000032088,ENSMUSP00000032429,ENSMUSP00000032918,ENSMUSP00000034022,…	Alkbh5,Appl1,Atrx,Atxn2l,Brd8,Casp8ap2,Cbx4,Cdk12,Cpsf2,Cpsf6,Creb3,Crebrf,Cxxc1,Eny2,Ercc4,Ezh1,Faap20,Fancb,Gatad2b,Hspa1a,Ints12,Ints6,Ints8,Kansl1,Lin52,Magoh,Meaf6,Med15,Med21,Med28,Mllt3,Morf4l1,Msl1,Nudt21,Ogt,PAGR1,Phax,Phf21a,Pole4,Polr2a,Polr3f,Polr3k,Prpf19,Psme4,Rb1,Rbm4,Rp9,Rpa1,Rpa2,Rprd2,Sap30,Sfpq,Slu7,Snrnp70,Sqstm1,Srrm1,Srsf10,Tardbp,Tbl1xr1,Tgs1,Trp53,Ube2i,Ubox5,Usp7,Wdr61,Yt…
GO.0031988	membrane-bounded vesicle	243	2.37e-05	ENSMUSP00000000335,ENSMUSP00000000910,ENSMUSP00000001187,ENSMUSP00000001547,ENSMUSP00000001548,ENSMUSP00000001569,ENSMUSP00000001592,ENSMUSP00000001757,ENSMUSP00000001824,ENSMUSP00000001920,ENSMUSP00000002400,ENSMUSP00000002572,ENSMUSP00000002818,ENSMUSP00000003575,ENSMUSP00000004378,ENSMUSP00000004560,ENSMUSP00000004990,ENSMUSP00000005077,ENSMUSP00000005606,ENSMUSP00000005620,ENSMUSP00000005714,…	AU040320,AY007814,Aasdhppt,Abhd14b,Abi2,Acaa2,Acsl4,Actn1,Adcy1,Aif1l,Ak2,Als2cl,Amot,Anpep,Anxa11,Anxa4,Anxa9,Ap1g1,Ap2a1,Ap3b1,Apba1,Aplp2,Appbp2,Appl1,Arf3,Arl15,Arl8a,Arrdc1,Atic,Atp6v1a,B4galt5,Bid,Bloc1s6,Bmp1,Bmp7,Brsk1,Cab39l,Cacfd1,Camk4,Capzb,Ccdc88a,Ccny,Cct4,Ccz1,Cd37,Cd47,Cdh11,Cdh13,Cfl1,Cfl2,Chic1,Chmp3,Ckap4,Clta,Cmpk1,Cnp,Col1a1,Comt,Copg2,Cotl1,Cpd,Crtc2,Csrp1,Ctdsp1,Cttnbp2,Cux…
GO.0048471	perinuclear region of cytoplasm	63	2.37e-05	ENSMUSP00000001187,ENSMUSP00000001548,ENSMUSP00000005606,ENSMUSP00000020546,ENSMUSP00000021574,ENSMUSP00000023087,ENSMUSP00000023467,ENSMUSP00000023486,ENSMUSP00000023813,ENSMUSP00000023829,ENSMUSP00000024099,ENSMUSP00000024860,ENSMUSP00000024869,ENSMUSP00000025110,ENSMUSP00000025729,ENSMUSP00000025830,ENSMUSP00000025925,ENSMUSP00000026826,ENSMUSP00000028241,ENSMUSP00000030118,ENSMUSP00000030536,…	Ache,Acsl3,Anp32a,Anxa4,Ap1g1,Apba1,Arf3,Cabp1,Capzb,Cdh13,Cdkn1a,Ckap4,Cnp,Col4a3bp,Dnaja1,Dnm2,Ehd3,Fbxw7,Fgfr3,Fkbp4,Gskip,Gtpbp4,Hhatl,Hspa1a,Inf2,Itga3,Lnpep,Mob2,Mob4,Mre11a,Mt1,Mt3,Nme1,Pak2,Per2,Pink1,Pla2g16,Prkaca,Prkce,Ptk2,Rab40c,Rad51c,Rangap1,Rbm4,Rps6kb1,Spast,Stc2,Stom,Syt4,Tarbp2,Tfrc,Tnks2,Tpd52l2,Trappc2,Trf,Trim13,Twf1,Uso1,Usp2,Vamp7,Vti1b,Zdhhc8,Zfyve1
GO.0098805	whole membrane	145	4.29e-05	ENSMUSP00000000335,ENSMUSP00000000641,ENSMUSP00000000642,ENSMUSP00000000910,ENSMUSP00000001187,ENSMUSP00000001548,ENSMUSP00000001569,ENSMUSP00000001920,ENSMUSP00000002572,ENSMUSP00000003351,ENSMUSP00000003669,ENSMUSP00000005798,ENSMUSP00000008684,ENSMUSP00000016678,ENSMUSP00000018186,ENSMUSP00000019044,ENSMUSP00000020340,ENSMUSP00000020400,ENSMUSP00000020523,ENSMUSP00000021329,ENSMUSP00000021554,…	AY007814,Abcg8,Abi2,Acsl3,Acsl4,Actn1,Adora1,Aif1l,Anpep,Anxa4,Ap1g1,Ap2a1,Ap3b1,Appl1,Arl8a,Armcx3,Atg5,Atg9a,Atp11c,Atp1a2,Atp6v1a,Bcl2,Bves,Casp3,Ccz1,Cdh13,Cfl1,Chmp3,Clta,Cnp,Cntnap2,Comt,Copg2,Ctnna2,Cyb5r3,Dbh,Ehd3,Epn1,Exoc3,Faim2,Far1,Flot1,Fnbp1,Fndc5,Furin,Gjb6,Gnpnat1,Gosr2,Gphn,Gpr89,Grid1,Grid2,Grin2c,Hax1,Hbxip,Hk2,Homer1,Homer3,Ica1,Irs1,Itga3,Kcnc1,Kcnj11,Lamp2,Laptm5,Ldlr,Leprot…
GO.0045202	synapse	67	5e-05	ENSMUSP00000000335,ENSMUSP00000000641,ENSMUSP00000001548,ENSMUSP00000003351,ENSMUSP00000003669,ENSMUSP00000005606,ENSMUSP00000020400,ENSMUSP00000021045,ENSMUSP00000021802,ENSMUSP00000022429,ENSMUSP00000023334,ENSMUSP00000023750,ENSMUSP00000023758,ENSMUSP00000024099,ENSMUSP00000025110,ENSMUSP00000025830,ENSMUSP00000025999,ENSMUSP00000026436,ENSMUSP00000026985,ENSMUSP00000027038,ENSMUSP00000027178,…	Accn1,Accn2,Ache,Add3,Als2,Apba1,Arf4,Atcay,Atp1a2,Baiap2,Bcan,Brsk1,Cabp1,Cacfd1,Cap2,Comt,Cpeb3,Cplx2,Ctnna2,Dact1,Dclk1,Dlgap4,Dnm2,Dtna,Epn1,Faim2,Gphn,Grid1,Grid2,Grin2c,Homer1,Homer3,Ica1,Itga3,Lgi1,Lrrtm1,Lrrtm2,Lrrtm4,Mgll,Mink1,Mob4,Mtap4,Nelf,Nlgn2,Nmnat2,Oprk1,P2rx3,Pdpk1,Pias3,Ppt1,Prkaca,Pvrl3,Rab3c,Rasgrp2,Rph3a,Rps6kb1,Sema4f,Sncb,Spg20,Srgap2,Syn1,Syp,Syt11,Syt4,Tbc1d24,Tmem57,Vam…
GO.0031982	vesicle	248	5.38e-05	ENSMUSP00000000335,ENSMUSP00000000910,ENSMUSP00000001187,ENSMUSP00000001547,ENSMUSP00000001548,ENSMUSP00000001569,ENSMUSP00000001592,ENSMUSP00000001757,ENSMUSP00000001824,ENSMUSP00000001920,ENSMUSP00000002400,ENSMUSP00000002572,ENSMUSP00000002818,ENSMUSP00000003575,ENSMUSP00000004378,ENSMUSP00000004560,ENSMUSP00000004990,ENSMUSP00000005077,ENSMUSP00000005606,ENSMUSP00000005620,ENSMUSP00000005714,…	AU040320,AY007814,Aasdhppt,Abhd14b,Abi2,Acaa2,Acsl4,Actn1,Adcy1,Aif1l,Ak2,Als2,Als2cl,Amot,Anpep,Anxa11,Anxa4,Anxa9,Ap1g1,Ap2a1,Ap3b1,Apba1,Aplp2,Appbp2,Appl1,Arf3,Arl15,Arl8a,Arrdc1,Atg9a,Atic,Atp1a2,Atp6v1a,B4galt5,Bid,Bloc1s6,Bmp1,Bmp7,Brsk1,Cab39l,Cacfd1,Camk4,Capzb,Ccdc88a,Ccny,Cct4,Ccz1,Cd37,Cd47,Cdh11,Cdh13,Cfl1,Cfl2,Chic1,Chmp3,Ckap4,Clta,Cmpk1,Cnp,Col1a1,Comt,Copg2,Cotl1,Cpd,Crtc2,Csrp1,…
GO.0044431	Golgi apparatus part	67	0.000118	ENSMUSP00000002818,ENSMUSP00000004097,ENSMUSP00000008907,ENSMUSP00000014892,ENSMUSP00000020251,ENSMUSP00000020391,ENSMUSP00000021329,ENSMUSP00000022196,ENSMUSP00000022765,ENSMUSP00000022871,ENSMUSP00000023295,ENSMUSP00000025729,ENSMUSP00000025897,ENSMUSP00000027866,ENSMUSP00000028238,ENSMUSP00000029141,ENSMUSP00000029738,ENSMUSP00000030254,ENSMUSP00000031355,ENSMUSP00000031519,ENSMUSP00000032279,…	Acpl2,Acr,Ap1g1,Ap3b1,Asah3l,Atg9a,B4galt5,Blzf1,Cabp1,Cbfa2t3,Clta,Copg2,Creb3,Csgalnact2,Cux1,Dhcr24,Dnm2,Erc1,Fam57b,Fkrp,Gcc2,Gcnt2,Gnpnat1,Gnptab,Gosr2,Gpr89,Gpsm1,Hid1,Ica1,Lap3,Leprot,Man1a2,Map4k2,Mgat4b,Mmp24,Mob4,Myo18a,Ndst2,Nmnat2,Pitpnm1,Rab14,Rab27b,Rab2a,Rab2b,Rab30,Rab36,Rnf121,Scamp2,Sdc2,Sdc3,Sppl2b,St3gal6,St8sia4,Stx18,Sulf2,Sybu,Tex261,Tgoln1,Tnks2,Uso1,Vamp7,Vcpip1,Whamm,Wls…
GO.0043005	neuron projection	79	0.000194	ENSMUSP00000000335,ENSMUSP00000001548,ENSMUSP00000003351,ENSMUSP00000004054,ENSMUSP00000005606,ENSMUSP00000009727,ENSMUSP00000020400,ENSMUSP00000021045,ENSMUSP00000021514,ENSMUSP00000022429,ENSMUSP00000022819,ENSMUSP00000023509,ENSMUSP00000023758,ENSMUSP00000025110,ENSMUSP00000026436,ENSMUSP00000026985,ENSMUSP00000030412,ENSMUSP00000030536,ENSMUSP00000030628,ENSMUSP00000030714,ENSMUSP00000031490,…	Abi2,Accn1,Accn2,Arf4,Atcay,Atp1a2,Baiap2,Bcan,Cabp1,Cdh13,Cntn2,Cntnap2,Comt,Cpeb3,Cplx2,Ctnna2,Cttnbp2,Dcc,Dnm2,Epn1,Fkbp15,Fkbp4,Glul,Gnao1,Gprin1,Grid1,Grid2,Grin2c,Hcfc1,Homer1,Iglon5,Itga3,Jph4,Kcnc1,Kcnj11,Kif1b,Klc2,Klhl24,Kpna1,Lrrtm1,Lsamp,Mgll,Mink1,Mob2,Mob4,Mt3,Ncmap,Nelf,Nell2,Osbp2,Pi4k2a,Pias3,Pink1,Ppm1a,Ppt1,Prkaca,Rangap1,Rasgrp2,Rbm3,Rgs2,Rph3a,Rps6kb1,Sdc3,Sema3a,Siah2,Srgap2…
GO.0071944	cell periphery	277	0.000333	ENSMUSP00000000001,ENSMUSP00000000129,ENSMUSP00000000365,ENSMUSP00000000641,ENSMUSP00000001187,ENSMUSP00000001256,ENSMUSP00000001548,ENSMUSP00000001569,ENSMUSP00000001592,ENSMUSP00000001824,ENSMUSP00000001920,ENSMUSP00000002572,ENSMUSP00000002818,ENSMUSP00000003351,ENSMUSP00000003575,ENSMUSP00000003669,ENSMUSP00000004378,ENSMUSP00000005077,ENSMUSP00000005606,ENSMUSP00000005719,ENSMUSP00000015146,…	AY007814,Abcg1,Abcg2,Abcg8,Accn1,Accn2,Ache,Actn1,Adcy1,Adcy9,Add3,Adp,Adrbk1,Aif1l,Amot,Anpep,Anxa4,Ap2a1,Apba1,Aplnr,Aplp2,Arhgap33,Arhgef1,Arrdc1,Arrdc3,Asah2,Asph,Atp11c,Atp1a2,Atp6v1a,Bai1,Baiap2,Bambi,Bcas3,Bves,Cacnb2,Cap2,Capzb,Casp3,Ccdc123,Ccdc88a,Ccny,Cd37,Cd47,Cdc42ep4,Cdh11,Cdh13,Cdh22,Celsr2,Cfl1,Chic1,Chmp3,Chuk,Ckap4,Clta,Cnp,Cntn2,Cntnap2,Csmd3,Ctnna2,Cttnbp2,Daam1,Dcc,Dgkg,Dnajb…
GO.0031967	organelle envelope	83	0.000375	ENSMUSP00000000632,ENSMUSP00000000642,ENSMUSP00000001187,ENSMUSP00000004560,ENSMUSP00000008684,ENSMUSP00000017332,ENSMUSP00000018186,ENSMUSP00000019721,ENSMUSP00000019859,ENSMUSP00000021091,ENSMUSP00000021183,ENSMUSP00000021574,ENSMUSP00000022416,ENSMUSP00000022908,ENSMUSP00000023071,ENSMUSP00000023448,ENSMUSP00000025729,ENSMUSP00000027125,ENSMUSP00000028426,ENSMUSP00000028465,ENSMUSP00000028763,…	Abcg2,Acaa2,Acn9,Acsl3,Acsl4,Agpat5,Aifm3,Ak2,Alas2,Anxa11,Anxa4,Armcx3,Atcay,Bckdhb,Bcl2,Bid,Ccdc123,Chchd4,Chchd6,Chchd7,Ciapin1,Cnp,Coa3,Coq10b,Cotl1,Ctdnep1,Cyb5r3,Eif5a2,Eny2,Eral1,Exog,Gle1,Grpel2,Gtpbp4,Hax1,Hk2,Ina,Kcnj11,Lass6,Ltc4s,Mcl1,Mcm3ap,Mgst1,Micu1,Mt3,Nat8l,Nav3,Ndufab1,Ndufc2,Nelf,Nlrx1,Nme1,Nup160,Nup188,Nup50,Nup54,P2rx3,Pafah1b1,Pdk4,Pi4kb,Pink1,Rps6kb1,Samm50,Slc25a23,Slc25…
GO.0044433	cytoplasmic vesicle part	44	0.000428	ENSMUSP00000000910,ENSMUSP00000002818,ENSMUSP00000009727,ENSMUSP00000016678,ENSMUSP00000018625,ENSMUSP00000020340,ENSMUSP00000021329,ENSMUSP00000021554,ENSMUSP00000022196,ENSMUSP00000023295,ENSMUSP00000025110,ENSMUSP00000026084,ENSMUSP00000028238,ENSMUSP00000028648,ENSMUSP00000029738,ENSMUSP00000031029,ENSMUSP00000031355,ENSMUSP00000031490,ENSMUSP00000032487,ENSMUSP00000035158,ENSMUSP00000036289,…	AY007814,Acr,Actn1,Ap1g1,Ap3b1,Appbp2,Cacfd1,Clta,Copg2,Dbh,Dysf,Exoc3,Furin,Gosr2,Gpr89,Ica1,Kif1b,Lamp2,Lnpep,Pcsk4,Pi4k2a,Rab14,Rab27b,Rab3c,Rph3a,Slc18a2,Snx17,Sppl2b,Spred2,Syngr1,Syp,Syt11,Syt13,Syt4,Trf,Ulk1,Uso1,Vamp1,Vamp7,Vti1b,Whamm,Wls,Ykt6,Zdhhc8
GO.0031968	organelle outer membrane	24	0.000485	ENSMUSP00000000642,ENSMUSP00000008684,ENSMUSP00000018186,ENSMUSP00000023071,ENSMUSP00000030536,ENSMUSP00000032719,ENSMUSP00000033634,ENSMUSP00000034211,ENSMUSP00000034621,ENSMUSP00000039529,ENSMUSP00000042367,ENSMUSP00000044048,ENSMUSP00000045291,ENSMUSP00000048350,ENSMUSP00000072134,ENSMUSP00000078661,ENSMUSP00000080518,ENSMUSP00000086405,ENSMUSP00000099409,ENSMUSP00000099833,ENSMUSP00000108371,…	Acsl3,Acsl4,Armcx3,Bcl2,Cnp,Cyb5r3,Hax1,Hk2,Ltc4s,Mcl1,Mgst1,Mt3,Nav3,Nlrx1,Nme1,Pi4kb,Pink1,Rps6kb1,Samm50,Snn,Spg20,Tmem109,Tomm20,Vat1
GO.0012506	vesicle membrane	40	0.000551	ENSMUSP00000000910,ENSMUSP00000001187,ENSMUSP00000002818,ENSMUSP00000016678,ENSMUSP00000018625,ENSMUSP00000020340,ENSMUSP00000021090,ENSMUSP00000021329,ENSMUSP00000021554,ENSMUSP00000022196,ENSMUSP00000026084,ENSMUSP00000028238,ENSMUSP00000028648,ENSMUSP00000029738,ENSMUSP00000031029,ENSMUSP00000031355,ENSMUSP00000031490,ENSMUSP00000032487,ENSMUSP00000035158,ENSMUSP00000036289,ENSMUSP00000036998,…	AY007814,Actn1,Anxa4,Ap1g1,Ap3b1,Appbp2,Appl1,Clta,Copg2,Dbh,Dysf,Exoc3,Furin,Gosr2,Gpr89,Grb2,Ica1,Kif1b,Lamp2,Lnpep,Nck1,Pcsk4,Rab14,Rab27b,Rab3c,Slc18a2,Snx17,Sppl2b,Spred2,Syt13,Trf,Ulk1,Uso1,Vamp1,Vamp7,Vti1b,Whamm,Wls,Ykt6,Zdhhc8
GO.0000139	Golgi membrane	52	0.00102	ENSMUSP00000002818,ENSMUSP00000004097,ENSMUSP00000008907,ENSMUSP00000014892,ENSMUSP00000020251,ENSMUSP00000020391,ENSMUSP00000021329,ENSMUSP00000022765,ENSMUSP00000025729,ENSMUSP00000025897,ENSMUSP00000027866,ENSMUSP00000028238,ENSMUSP00000029141,ENSMUSP00000029738,ENSMUSP00000030254,ENSMUSP00000031355,ENSMUSP00000031519,ENSMUSP00000032279,ENSMUSP00000036289,ENSMUSP00000038063,ENSMUSP00000038350,…	Acpl2,Asah3l,B4galt5,Blzf1,Cabp1,Cbfa2t3,Clta,Copg2,Creb3,Csgalnact2,Cux1,Dhcr24,Dnm2,Erc1,Fam57b,Fkrp,Furin,Gcnt2,Gnpnat1,Gnptab,Gosr2,Gpr89,Gpsm1,Hid1,Ica1,Leprot,Man1a2,Map4k2,Mgat4b,Mmp24,Mob4,Myo18a,Ndst2,Pitpnm1,Rab14,Rab2a,Rab2b,Rab36,Rnf121,Scamp2,Sppl2b,St3gal6,St8sia4,Stx18,Sybu,Tex261,Tnks2,Uso1,Whamm,Wls,Ykt6,Zdhhc9
GO.0005741	mitochondrial outer membrane	21	0.0012	ENSMUSP00000000642,ENSMUSP00000008684,ENSMUSP00000018186,ENSMUSP00000023071,ENSMUSP00000030536,ENSMUSP00000033634,ENSMUSP00000034211,ENSMUSP00000034621,ENSMUSP00000042367,ENSMUSP00000044048,ENSMUSP00000045291,ENSMUSP00000048350,ENSMUSP00000072134,ENSMUSP00000078661,ENSMUSP00000080518,ENSMUSP00000086405,ENSMUSP00000099409,ENSMUSP00000108371,ENSMUSP00000117022,ENSMUSP00000119715,ENSMUSP00000136493	Acsl3,Acsl4,Armcx3,Bcl2,Cnp,Cyb5r3,Hax1,Hk2,Mcl1,Mgst1,Mt3,Nlrx1,Nme1,Pi4kb,Pink1,Rps6kb1,Samm50,Snn,Spg20,Tomm20,Vat1
GO.0042995	cell projection	130	0.00133	ENSMUSP00000000129,ENSMUSP00000000335,ENSMUSP00000001569,ENSMUSP00000001920,ENSMUSP00000002572,ENSMUSP00000003351,ENSMUSP00000003669,ENSMUSP00000004054,ENSMUSP00000009157,ENSMUSP00000009727,ENSMUSP00000019044,ENSMUSP00000020400,ENSMUSP00000021045,ENSMUSP00000021514,ENSMUSP00000021554,ENSMUSP00000021689,ENSMUSP00000021802,ENSMUSP00000022819,ENSMUSP00000023072,ENSMUSP00000023087,ENSMUSP00000023509,…	Abi2,Accn1,Accn2,Actn1,Add3,Adrbk1,Aif1l,Ak2,Alms1,Amot,Ap2a1,Atcay,Atg5,Atg7,Atp1a2,Atp6v1a,Baiap2,Bcan,Bves,Cabp1,Cap2,Capzb,Ccdc123,Ccdc88a,Cdh13,Cfl1,Cnp,Cntn2,Cntnap2,Comt,Cpeb3,Cplx2,Ctnna2,Ctnna3,Cttnbp2,Dcc,Dclk1,Dnm2,Dynll1,Dysf,Epn1,Evl,Fam49b,Fbf1,Fer,Fkbp15,Fkbp4,Flot1,Gfap,Gnao1,Gprin1,Grid1,Grid2,Grin2c,Hax1,Hcfc1,Homer1,Homer3,Iglon5,Irs1,Jph4,Kcnc1,Kcnj11,Kif1b,Klc2,Klhl24,Kpna1,L…
GO.0005768	endosome	62	0.00165	ENSMUSP00000001569,ENSMUSP00000002818,ENSMUSP00000005798,ENSMUSP00000005954,ENSMUSP00000016678,ENSMUSP00000021090,ENSMUSP00000021329,ENSMUSP00000021714,ENSMUSP00000022993,ENSMUSP00000024829,ENSMUSP00000024860,ENSMUSP00000024869,ENSMUSP00000026826,ENSMUSP00000027178,ENSMUSP00000027297,ENSMUSP00000027684,ENSMUSP00000028049,ENSMUSP00000028224,ENSMUSP00000028238,ENSMUSP00000029047,ENSMUSP00000030080,…	Abcg1,Als2,Ap1g1,Appl1,Arl8a,Arrdc3,Astn2,Atg9a,Atp11c,Atp1a2,Bloc1s6,Cntnap2,Ctss,Derl1,Dnm2,Dysf,ENSMUSG00000030982,Ehd3,Fkbp15,Flot1,Furin,Gapvd1,Gnpnat1,Gosr2,Grb2,Hbxip,Kcnj11,Kcnk1,Lamp2,Ldlr,Leprot,Nipa2,Nmnat2,Pank1,Plekhb2,Rab14,Rab27b,Rab3c,Rab40c,Rabep1,Rabgap1l,Rcc2,Scamp2,Siah2,Slc31a1,Snx16,Snx17,Snx30,Snx6,Spast,Sppl2b,Sqstm1,Trak1,Trf,Trim3,Vamp7,Vps29,Vps37a,Vps37d,Vti1b,Ykt6,Zfy…
GO.0005886	plasma membrane	266	0.00165	ENSMUSP00000000001,ENSMUSP00000000129,ENSMUSP00000000365,ENSMUSP00000000641,ENSMUSP00000001187,ENSMUSP00000001256,ENSMUSP00000001548,ENSMUSP00000001569,ENSMUSP00000001592,ENSMUSP00000001824,ENSMUSP00000001920,ENSMUSP00000002572,ENSMUSP00000002818,ENSMUSP00000003351,ENSMUSP00000003669,ENSMUSP00000004378,ENSMUSP00000005077,ENSMUSP00000005606,ENSMUSP00000005719,ENSMUSP00000015146,ENSMUSP00000015460,…	AY007814,Abcg1,Abcg2,Abcg8,Accn1,Accn2,Ache,Actn1,Adcy1,Adcy9,Add3,Adp,Adrbk1,Aif1l,Amot,Anpep,Anxa4,Ap2a1,Apba1,Aplnr,Aplp2,Arhgap33,Arhgef1,Arrdc1,Arrdc3,Asah2,Asph,Atp11c,Atp1a2,Atp6v1a,Bai1,Baiap2,Bambi,Bves,Cacnb2,Cap2,Casp3,Ccdc123,Ccdc88a,Ccny,Cd37,Cd47,Cdc42ep4,Cdh11,Cdh13,Cdh22,Celsr2,Cfl1,Chic1,Chmp3,Chuk,Ckap4,Clta,Cnp,Cntn2,Cntnap2,Csmd3,Ctnna2,Daam1,Dcc,Dgkg,Dnajb4,Dnajc5,Dtna,Dysf,E…
GO.0005874	microtubule	38	0.0027	ENSMUSP00000004294,ENSMUSP00000009157,ENSMUSP00000018625,ENSMUSP00000020023,ENSMUSP00000020775,ENSMUSP00000024869,ENSMUSP00000028981,ENSMUSP00000029385,ENSMUSP00000032508,ENSMUSP00000033519,ENSMUSP00000034211,ENSMUSP00000034803,ENSMUSP00000035055,ENSMUSP00000035157,ENSMUSP00000035227,ENSMUSP00000036065,ENSMUSP00000038144,ENSMUSP00000038781,ENSMUSP00000053190,ENSMUSP00000054168,ENSMUSP00000061472,…	Appbp2,Bcas3,Bcl2l11,Cct4,Cnp,Dnm1,Dnm2,Dynll1,Dynll2,Dynlt3,Fkbp4,Hid1,Hook2,Kif1b,Kifc2,Klc2,Krit1,Mapre1,Mid2,Mt3,Mtap4,Mtus2,Nicn1,Rcc2,Reep2,Reep3,Serp1,Spast,Srprb,Stau2,Sybu,Tbca,Tbl1xr1,Tubb2b,Tubb4a,Whamm,Zfp207,Zw10
GO.0030133	transport vesicle	20	0.00297	ENSMUSP00000000910,ENSMUSP00000005954,ENSMUSP00000014892,ENSMUSP00000021329,ENSMUSP00000021676,ENSMUSP00000027837,ENSMUSP00000028238,ENSMUSP00000028648,ENSMUSP00000031355,ENSMUSP00000038350,ENSMUSP00000040062,ENSMUSP00000052262,ENSMUSP00000057462,ENSMUSP00000068349,ENSMUSP00000068487,ENSMUSP00000069284,ENSMUSP00000090987,ENSMUSP00000102985,ENSMUSP00000103483,ENSMUSP00000133064	Bloc1s6,Clta,Dbh,Fgfr3,Furin,Gosr2,Ica1,ORF11,Pi4k2a,Rab14,Rab27b,Scamp2,Spred2,Syt13,Tex261,Tgoln1,Uso1,Vamp7,Vangl2,Vti1b
GO.0036477	somatodendritic compartment	56	0.00297	ENSMUSP00000000335,ENSMUSP00000003351,ENSMUSP00000004054,ENSMUSP00000004378,ENSMUSP00000008445,ENSMUSP00000021045,ENSMUSP00000022429,ENSMUSP00000022819,ENSMUSP00000023509,ENSMUSP00000023758,ENSMUSP00000026436,ENSMUSP00000026985,ENSMUSP00000027038,ENSMUSP00000028465,ENSMUSP00000030412,ENSMUSP00000030714,ENSMUSP00000031490,ENSMUSP00000031519,ENSMUSP00000032508,ENSMUSP00000033634,ENSMUSP00000034198,…	Abi2,Accn1,Accn2,Acsl4,Arf4,Atcay,Atp1a2,Baiap2,Bcan,Cabp1,Cntn2,Cntnap2,Comt,Cpeb3,Cplx2,Creb3,Cttnbp2,Eno2,Fbxo31,Fkbp4,Glul,Gnao1,Grid1,Grid2,Grin2c,Homer1,Iglon5,Jph4,Kcnc1,Kcnj11,Klhl24,Kpna1,Lsamp,Mink1,Mob4,Mt3,Nelf,Nell2,Oprk1,Osbp2,P2rx3,Phax,Pias3,Ppt1,Rangap1,Rbm3,Sema3a,Siah2,Slc31a1,Srgap2,Srr,Syn1,Tubb4a,Ulk1,Wls,Zfp385a
GO.0030659	cytoplasmic vesicle membrane	36	0.00304	ENSMUSP00000000910,ENSMUSP00000002818,ENSMUSP00000016678,ENSMUSP00000018625,ENSMUSP00000020340,ENSMUSP00000021329,ENSMUSP00000021554,ENSMUSP00000022196,ENSMUSP00000026084,ENSMUSP00000028238,ENSMUSP00000028648,ENSMUSP00000029738,ENSMUSP00000031029,ENSMUSP00000031355,ENSMUSP00000031490,ENSMUSP00000032487,ENSMUSP00000035158,ENSMUSP00000036289,ENSMUSP00000036998,ENSMUSP00000038368,ENSMUSP00000039416,…	AY007814,Actn1,Ap1g1,Ap3b1,Appbp2,Clta,Copg2,Dbh,Dysf,Exoc3,Furin,Gosr2,Gpr89,Ica1,Kif1b,Lamp2,Lnpep,Pcsk4,Rab14,Rab27b,Rab3c,Slc18a2,Snx17,Sppl2b,Spred2,Syt13,Trf,Ulk1,Uso1,Vamp1,Vamp7,Vti1b,Whamm,Wls,Ykt6,Zdhhc8
GO.0016604	nuclear body	37	0.00324	ENSMUSP00000000767,ENSMUSP00000008445,ENSMUSP00000020681,ENSMUSP00000022701,ENSMUSP00000025444,ENSMUSP00000025642,ENSMUSP00000026665,ENSMUSP00000028761,ENSMUSP00000029950,ENSMUSP00000030348,ENSMUSP00000030623,ENSMUSP00000032088,ENSMUSP00000034204,ENSMUSP00000034763,ENSMUSP00000035415,ENSMUSP00000039133,ENSMUSP00000041370,ENSMUSP00000045460,ENSMUSP00000049116,ENSMUSP00000054112,ENSMUSP00000055714,…	Alkbh5,Atrx,Atxn2l,Casp8ap2,Cbx4,Cdk12,Cpsf6,Creb3,Crebrf,Cxxc1,Gatad2b,Hspa1a,Magoh,Nudt21,Phax,Prpf19,Psme4,Rb1,Rbm4,Rp9,Rpa1,Rpa2,Sfpq,Slu7,Snrnp70,Sqstm1,Srrm1,Srsf10,Tardbp,Tgs1,Trp53,Ube2i,Ubox5,Usp7,Ythdc1,Zfml,Zmiz1
GO.0044425	membrane part	377	0.00381	ENSMUSP00000000129,ENSMUSP00000000335,ENSMUSP00000000641,ENSMUSP00000000910,ENSMUSP00000001187,ENSMUSP00000001256,ENSMUSP00000001507,ENSMUSP00000001548,ENSMUSP00000001569,ENSMUSP00000001592,ENSMUSP00000001824,ENSMUSP00000001920,ENSMUSP00000002572,ENSMUSP00000002818,ENSMUSP00000002837,ENSMUSP00000003351,ENSMUSP00000003669,ENSMUSP00000003818,ENSMUSP00000004097,ENSMUSP00000004560,ENSMUSP00000005719,…	AI480653,AI597468,AU040320,AY007814,Abcg1,Abcg2,Abcg8,Abi2,Accn1,Accn2,Ache,Acpl2,Acsl3,Acsl4,Adcy1,Adcy9,Adora1,Adp,Agpat5,Aif1l,Amot,Anpep,Anxa4,Ap1g1,Ap3b1,Aplnr,Aplp2,Armcx3,Asah2,Asah3l,Asph,Astn2,Atg9a,Atp11c,Atp1a2,B4galt5,BC018242,Bai1,Bambi,Bcan,Bcl2,Bcl2l11,Bid,Bves,Cabp1,Cacfd1,Cacnb2,Car14,Casc4,Casp3,Cd37,Cd47,Cd99,Cdh11,Cdh13,Cdh22,Cds1,Celsr2,Cfl1,Chmp3,Chuk,Ckap4,Cln8,Clta,Cntn2,C…
GO.0005811	lipid particle	11	0.00445	ENSMUSP00000018186,ENSMUSP00000025642,ENSMUSP00000033634,ENSMUSP00000033769,ENSMUSP00000042367,ENSMUSP00000045291,ENSMUSP00000050336,ENSMUSP00000054309,ENSMUSP00000066238,ENSMUSP00000122274,ENSMUSP00000127149	Abhd5,Acsl3,Acsl4,Ckap4,Cyb5r3,Irak1,Pitpnm1,Pnpla2,Prpf19,Rap1b,Spg20
GO.0031300	intrinsic component of organelle membrane	27	0.00448	ENSMUSP00000003818,ENSMUSP00000004097,ENSMUSP00000004560,ENSMUSP00000014892,ENSMUSP00000017332,ENSMUSP00000020523,ENSMUSP00000022993,ENSMUSP00000028222,ENSMUSP00000028465,ENSMUSP00000030536,ENSMUSP00000032761,ENSMUSP00000036289,ENSMUSP00000040048,ENSMUSP00000043477,ENSMUSP00000044734,ENSMUSP00000045351,ENSMUSP00000059494,ENSMUSP00000060892,ENSMUSP00000069429,ENSMUSP00000071351,ENSMUSP00000076790,…	Armcx3,Asah3l,Asph,Bid,Cacfd1,Coa3,Creb3,Cux1,Derl1,Elovl6,Emc6,Hspa5,Insig2,Micu1,P2rx3,Pex11a,Pex13,Pigk,Pink1,Porcn,Sppl2b,St3gal6,St8sia4,Syp,Tex261,Tmem11,Zdhhc9
GO.0030425	dendrite	42	0.00482	ENSMUSP00000000335,ENSMUSP00000003351,ENSMUSP00000004054,ENSMUSP00000021045,ENSMUSP00000022429,ENSMUSP00000022819,ENSMUSP00000023758,ENSMUSP00000026436,ENSMUSP00000026985,ENSMUSP00000027038,ENSMUSP00000027178,ENSMUSP00000028465,ENSMUSP00000030412,ENSMUSP00000030714,ENSMUSP00000031519,ENSMUSP00000033761,ENSMUSP00000034198,ENSMUSP00000034211,ENSMUSP00000036721,ENSMUSP00000038964,ENSMUSP00000043522,…	Abi2,Accn1,Accn2,Adora1,Als2,Arf4,Atcay,Atp1a2,Baiap2,Bcan,Cabp1,Cntnap2,Comt,Cpeb3,Cplx2,Cttnbp2,Gnao1,Grid1,Grid2,Grin2c,Hcfc1,Homer1,Jph4,Kpna1,Mink1,Mob4,Mt3,Nelf,Nell2,Oprk1,Osbp2,P2rx3,Pi4k2a,Pias3,Ppt1,Rangap1,Rbm3,Sema3a,Srgap2,Syn1,Wls,Zfp385a
GO.0098796	membrane protein complex	75	0.00522	ENSMUSP00000000001,ENSMUSP00000001548,ENSMUSP00000001569,ENSMUSP00000001592,ENSMUSP00000002818,ENSMUSP00000003351,ENSMUSP00000003818,ENSMUSP00000005798,ENSMUSP00000005954,ENSMUSP00000021090,ENSMUSP00000021329,ENSMUSP00000021514,ENSMUSP00000022196,ENSMUSP00000022993,ENSMUSP00000023071,ENSMUSP00000023486,ENSMUSP00000026217,ENSMUSP00000026985,ENSMUSP00000031224,ENSMUSP00000032487,ENSMUSP00000032882,…	Abcg8,Ap1g1,Ap3b1,Atp1a2,Atp6v1a,Bcl2,Bloc1s6,Cacnb2,Casp3,Chmp3,Chuk,Clta,Cntnap2,Copg2,Cplx2,Ctdnep1,Derl1,Dnm1,Dtna,Emc6,Flot1,Gjb6,Gjc2,Gnai1,Gnai3,Gnao1,Gng12,Gosr2,Grb2,Grid1,Grid2,Grin2c,Hbxip,Herpud1,Hook2,Insig2,Itga3,Jup,Kcnc1,Kcnj11,Kcnk1,Kcnt1,Lrrtm4,Micu1,Ncf1,Ndufab1,Ndufc2,Nup160,Pank1,Pigk,Pik3c2a,Pik3cb,Pik3r6,Porcn,Ppm1a,Rangap1,Rpn2,Samm50,Snx6,Spcs2,Stt3a,Stx18,Tfrc,Tgfbr3,Tom…
GO.0005694	chromosome	66	0.00549	ENSMUSP00000000129,ENSMUSP00000000767,ENSMUSP00000003876,ENSMUSP00000009120,ENSMUSP00000009157,ENSMUSP00000012612,ENSMUSP00000016452,ENSMUSP00000018333,ENSMUSP00000018556,ENSMUSP00000020004,ENSMUSP00000020657,ENSMUSP00000021052,ENSMUSP00000023151,ENSMUSP00000023206,ENSMUSP00000023598,ENSMUSP00000025729,ENSMUSP00000025999,ENSMUSP00000028098,ENSMUSP00000029448,ENSMUSP00000030138,ENSMUSP00000030536,…	Add3,Asf1a,Atrx,Bahcc1,Bcas3,Bcl6,Brd8,Dctn5,Dynll1,Dynlt3,Ercc4,Faap20,Fer,Gabpa,Gatad2b,Hmga1,Hmgn5,Jund,Kansl1,Kdm2a,Lig4,Mau2,Morf4l1,Neil1,Nelf,Nfe2l2,Nol6,Nup160,Orc4,Pink1,Pole4,Polr2a,Pot1a,Rad51c,Rangap1,Rcc2,Rfc4,Rif1,Rpa1,Rpa2,Sap30,Scmh1,Setd8,Sfpq,Shprh,Smarcc2,Smarcd2,Smarce1,Suv39h1,Suv420h1,Sycp1,Tardbp,Tcf12,Tcf3,Tnks2,Tnrc18,Trp53,Ube2a,Ube2b,Uchl5,Uvssa,Wdr61,Zfp207,Zfp385a,Zmi…
GO.0031301	integral component of organelle membrane	26	0.00549	ENSMUSP00000003818,ENSMUSP00000004097,ENSMUSP00000004560,ENSMUSP00000014892,ENSMUSP00000017332,ENSMUSP00000020523,ENSMUSP00000022993,ENSMUSP00000028222,ENSMUSP00000028465,ENSMUSP00000030536,ENSMUSP00000032761,ENSMUSP00000036289,ENSMUSP00000040048,ENSMUSP00000043477,ENSMUSP00000045351,ENSMUSP00000059494,ENSMUSP00000060892,ENSMUSP00000069429,ENSMUSP00000071351,ENSMUSP00000076790,ENSMUSP00000077273,…	Armcx3,Asah3l,Asph,Bid,Cacfd1,Coa3,Creb3,Cux1,Derl1,Elovl6,Emc6,Hspa5,Insig2,Micu1,P2rx3,Pex11a,Pex13,Pigk,Pink1,Porcn,Sppl2b,St3gal6,St8sia4,Syp,Tex261,Tmem11
GO.0061695	transferase complex, transferring phosphorus-containing groups	24	0.00638	ENSMUSP00000004330,ENSMUSP00000023206,ENSMUSP00000023829,ENSMUSP00000026973,ENSMUSP00000028914,ENSMUSP00000029650,ENSMUSP00000032279,ENSMUSP00000035037,ENSMUSP00000038418,ENSMUSP00000040488,ENSMUSP00000044582,ENSMUSP00000044653,ENSMUSP00000050001,ENSMUSP00000052522,ENSMUSP00000056359,ENSMUSP00000071200,ENSMUSP00000085187,ENSMUSP00000086788,ENSMUSP00000088297,ENSMUSP00000088336,ENSMUSP00000093462,…	C77370,Ccnd3,Ccny,Cd3eap,Cdk12,Cdkn1a,Dna2,Erc1,Ercc4,Ikbkg,Ints12,Ints6,Ints8,Pik3c2a,Pik3cb,Pik3r6,Pole4,Polr2a,Polr3f,Polr3k,Prkar1b,Rapgef4,Rprd2,Wdr61
GO.0015629	actin cytoskeleton	38	0.00656	ENSMUSP00000000129,ENSMUSP00000001675,ENSMUSP00000003575,ENSMUSP00000020775,ENSMUSP00000021183,ENSMUSP00000021554,ENSMUSP00000023087,ENSMUSP00000023918,ENSMUSP00000026436,ENSMUSP00000027263,ENSMUSP00000027677,ENSMUSP00000027837,ENSMUSP00000028098,ENSMUSP00000034057,ENSMUSP00000042123,ENSMUSP00000046557,ENSMUSP00000052322,ENSMUSP00000060227,ENSMUSP00000070427,ENSMUSP00000072087,ENSMUSP00000076751,…	Actn1,Amot,Baiap2,Capzb,Cdc42ep4,Cfl1,Cfl2,Csrp1,Ctnna2,Cttnbp2nl,Daam1,Dynll2,Eral1,Fer,Gng12,Hax1,Ints6,Ivns1abp,Lasp1,Med28,Mtss1,Myadm,Myo18a,Onecut2,Orc4,Palld,Pls1,Ptk2,Rltpr,Stk17b,Stk38l,Tmod3,Tpm2,Tpm4,Twf1,Ube2k,Vangl2,Zyx
GO.0044456	synapse part	49	0.00656	ENSMUSP00000000335,ENSMUSP00000000641,ENSMUSP00000001548,ENSMUSP00000003351,ENSMUSP00000003669,ENSMUSP00000020400,ENSMUSP00000021045,ENSMUSP00000021802,ENSMUSP00000022429,ENSMUSP00000023334,ENSMUSP00000023750,ENSMUSP00000023758,ENSMUSP00000025110,ENSMUSP00000025830,ENSMUSP00000025999,ENSMUSP00000026436,ENSMUSP00000026985,ENSMUSP00000027178,ENSMUSP00000028465,ENSMUSP00000030412,ENSMUSP00000031519,…	Accn1,Accn2,Add3,Als2,Apba1,Arf4,Atp1a2,Baiap2,Brsk1,Cabp1,Cacfd1,Cap2,Comt,Cplx2,Ctnna2,Dclk1,Dnm2,Epn1,Erc1,Faim2,Gphn,Grid1,Grid2,Grin2c,Homer1,Homer3,Ica1,Itga3,Lrrtm1,Lrrtm2,Lrrtm4,Mink1,Mob4,Mtap4,Nelf,Nlgn2,P2rx3,Pdpk1,Ppt1,Pvrl3,Rab3c,Rph3a,Sema4f,Srgap2,Syn1,Syp,Syt11,Syt4,Tbc1d24
GO.0031252	cell leading edge	35	0.00699	ENSMUSP00000000129,ENSMUSP00000001569,ENSMUSP00000001920,ENSMUSP00000021091,ENSMUSP00000021554,ENSMUSP00000021689,ENSMUSP00000023072,ENSMUSP00000024698,ENSMUSP00000026436,ENSMUSP00000027178,ENSMUSP00000034057,ENSMUSP00000040596,ENSMUSP00000041135,ENSMUSP00000043522,ENSMUSP00000048978,ENSMUSP00000051888,ENSMUSP00000052262,ENSMUSP00000058754,ENSMUSP00000067898,ENSMUSP00000072087,ENSMUSP00000074416,…	Abi2,Actn1,Adora1,Aif1l,Als2,Amot,Baiap2,Bcas3,Capzb,Ccdc88a,Cfl1,Cntnap2,Ctnna2,Ctnna3,Dnm2,Dysf,Evl,Fer,Flot1,Hax1,Kcnc1,Kcnj11,Myadm,Pafah1b1,Palld,Palm,Parvb,Ptk2,Rasgrp2,Srgap2,Tmod3,Tnfrsf12a,Tpm1,Vamp7,Wls
GO.0005643	nuclear pore	10	0.00705	ENSMUSP00000019859,ENSMUSP00000042852,ENSMUSP00000046540,ENSMUSP00000050289,ENSMUSP00000052905,ENSMUSP00000057771,ENSMUSP00000059289,ENSMUSP00000065836,ENSMUSP00000125960,ENSMUSP00000131457	Eif5a2,Eny2,Gle1,Mcm3ap,Nup160,Nup188,Nup50,Nup54,Rangap1,Tmem33
GO.0098794	postsynapse	36	0.00721	ENSMUSP00000000335,ENSMUSP00000000641,ENSMUSP00000003351,ENSMUSP00000003669,ENSMUSP00000020400,ENSMUSP00000021045,ENSMUSP00000021802,ENSMUSP00000022429,ENSMUSP00000023334,ENSMUSP00000023750,ENSMUSP00000023758,ENSMUSP00000025999,ENSMUSP00000026436,ENSMUSP00000027178,ENSMUSP00000028465,ENSMUSP00000031519,ENSMUSP00000034211,ENSMUSP00000035055,ENSMUSP00000040596,ENSMUSP00000044009,ENSMUSP00000050034,…	Accn1,Accn2,Add3,Als2,Arf4,Atp1a2,Baiap2,Cabp1,Cap2,Comt,Ctnna2,Cttnbp2,Dclk1,Dnm2,Faim2,Gphn,Grid1,Grid2,Grin2c,Homer1,Homer3,Lrrtm1,Lrrtm2,Lrrtm4,Mink1,Mob4,Mt3,Mtap4,Nelf,Nlgn2,P2rx3,Palm,Pdpk1,Pvrl3,Sema4f,Srgap2
GO.0044233	ER-mitochondrion membrane contact site	4	0.00779	ENSMUSP00000033634,ENSMUSP00000042224,ENSMUSP00000044769,ENSMUSP00000136493	Acsl4,Atg5,Tomm20,Zfyve1
GO.0030027	lamellipodium	21	0.008	ENSMUSP00000000129,ENSMUSP00000001569,ENSMUSP00000021689,ENSMUSP00000023072,ENSMUSP00000027178,ENSMUSP00000034057,ENSMUSP00000048978,ENSMUSP00000052262,ENSMUSP00000058754,ENSMUSP00000072087,ENSMUSP00000074606,ENSMUSP00000078661,ENSMUSP00000080579,ENSMUSP00000095195,ENSMUSP00000099565,ENSMUSP00000105663,ENSMUSP00000108455,ENSMUSP00000112259,ENSMUSP00000117022,ENSMUSP00000124376,ENSMUSP00000133564	Abi2,Als2,Amot,Capzb,Ccdc88a,Cfl1,Ctnna2,Ctnna3,Dnm2,Dysf,Evl,Fer,Flot1,Hax1,Nme1,Palld,Parvb,Ptk2,Srgap2,Tmod3,Vamp7
GO.0005912	adherens junction	43	0.00805	ENSMUSP00000001548,ENSMUSP00000001569,ENSMUSP00000001592,ENSMUSP00000001920,ENSMUSP00000002572,ENSMUSP00000003575,ENSMUSP00000005077,ENSMUSP00000015855,ENSMUSP00000021554,ENSMUSP00000021689,ENSMUSP00000021714,ENSMUSP00000023072,ENSMUSP00000023087,ENSMUSP00000023334,ENSMUSP00000024860,ENSMUSP00000024984,ENSMUSP00000025295,ENSMUSP00000027677,ENSMUSP00000028222,ENSMUSP00000031377,ENSMUSP00000032479,…	Abi2,Actn1,Aif1l,Cdh13,Cfl1,Csrp1,Ctnna2,Ctnna3,Dnm2,Ehd3,Evl,Flot1,Hspa5,Hspb1,Itga3,Jup,Lap3,Lasp1,Lig4,Lpp,Mmp14,Mrc2,Mtss1,Palld,Parvb,Pdpk1,Pianp,Pkp3,Pnma1,Prkar2a,Prune,Ptk2,Pvrl3,Rpl18,Scarb2,Slc9a3r2,Spry4,Tgfb1i1,Tmem204,Tpm4,Twf1,Zfyve21,Zyx
GO.0016514	SWI/SNF complex	5	0.00834	ENSMUSP00000021052,ENSMUSP00000023759,ENSMUSP00000099422,ENSMUSP00000100868,ENSMUSP00000119356	Actl6b,Smarcc2,Smarcd1,Smarcd2,Smarce1
GO.0044427	chromosomal part	59	0.0089	ENSMUSP00000000129,ENSMUSP00000000767,ENSMUSP00000003876,ENSMUSP00000009120,ENSMUSP00000009157,ENSMUSP00000012612,ENSMUSP00000016452,ENSMUSP00000018333,ENSMUSP00000018556,ENSMUSP00000020004,ENSMUSP00000020657,ENSMUSP00000021052,ENSMUSP00000023151,ENSMUSP00000023206,ENSMUSP00000023598,ENSMUSP00000025729,ENSMUSP00000028098,ENSMUSP00000029448,ENSMUSP00000030536,ENSMUSP00000030623,ENSMUSP00000033156,…	Asf1a,Atrx,Bahcc1,Bcas3,Bcl6,Brd8,Dctn5,Dynll1,Dynlt3,Ercc4,Fer,Gabpa,Gatad2b,Hmga1,Hmgn5,Jund,Kansl1,Kdm2a,Mau2,Morf4l1,Nelf,Nfe2l2,Nup160,Orc4,Pink1,Pole4,Polr2a,Pot1a,Rad51c,Rangap1,Rcc2,Rfc4,Rif1,Rpa1,Rpa2,Sap30,Scmh1,Sfpq,Shprh,Smarcc2,Smarcd2,Smarce1,Suv39h1,Suv420h1,Sycp1,Tardbp,Tcf12,Tcf3,Tnks2,Tnrc18,Trp53,Ube2a,Ube2b,Uchl5,Wdr61,Zfp207,Zfp385a,Zmiz2,Zw10
GO.0070161	anchoring junction	44	0.00967	ENSMUSP00000001548,ENSMUSP00000001569,ENSMUSP00000001592,ENSMUSP00000001920,ENSMUSP00000002572,ENSMUSP00000003575,ENSMUSP00000005077,ENSMUSP00000015855,ENSMUSP00000021554,ENSMUSP00000021689,ENSMUSP00000021714,ENSMUSP00000023072,ENSMUSP00000023087,ENSMUSP00000023334,ENSMUSP00000024860,ENSMUSP00000024984,ENSMUSP00000025295,ENSMUSP00000027677,ENSMUSP00000028222,ENSMUSP00000031377,ENSMUSP00000032479,…	Abi2,Actn1,Aif1l,Cdh13,Cfl1,Csrp1,Ctnna2,Ctnna3,Dnm2,Ehd3,Evl,Flot1,Hspa5,Hspb1,Itga3,Jup,Kazn,Lap3,Lasp1,Lig4,Lpp,Mmp14,Mrc2,Mtss1,Palld,Parvb,Pdpk1,Pianp,Pkp3,Pnma1,Prkar2a,Prune,Ptk2,Pvrl3,Rpl18,Scarb2,Slc9a3r2,Spry4,Tgfb1i1,Tmem204,Tpm4,Twf1,Zfyve21,Zyx
GO.0005657	replication fork	11	0.0115	ENSMUSP00000000767,ENSMUSP00000002825,ENSMUSP00000012612,ENSMUSP00000020657,ENSMUSP00000023151,ENSMUSP00000023598,ENSMUSP00000025642,ENSMUSP00000064079,ENSMUSP00000093462,ENSMUSP00000099621,ENSMUSP00000104298	Baz1b,Bcl6,Pole4,Prpf19,Rad51c,Rfc4,Rpa1,Rpa2,Trp53,Ube2b,Zmiz2
GO.0000151	ubiquitin ligase complex	23	0.0122	ENSMUSP00000004330,ENSMUSP00000016452,ENSMUSP00000020657,ENSMUSP00000022720,ENSMUSP00000022993,ENSMUSP00000026032,ENSMUSP00000026665,ENSMUSP00000028964,ENSMUSP00000030118,ENSMUSP00000032429,ENSMUSP00000033544,ENSMUSP00000038744,ENSMUSP00000048244,ENSMUSP00000057573,ENSMUSP00000059211,ENSMUSP00000061604,ENSMUSP00000075721,ENSMUSP00000080480,ENSMUSP00000083393,ENSMUSP00000094225,ENSMUSP00000102591,…	Anapc10,Anapc15,Anapc5,Brcc3,Cacul1,Cbx4,Crbn,Derl1,Dnaja1,Ercc8,Fbxl3,Fbxo31,Fbxw11,Fbxw7,Ikbkg,Med21,Pcgf6,Rbck1,Skp1a,Skp2,Ube2a,Ube2b,Ube2d2a
GO.0071565	nBAF complex	5	0.0122	ENSMUSP00000023759,ENSMUSP00000099422,ENSMUSP00000100868,ENSMUSP00000119356,ENSMUSP00000137477	Actl6b,Dpf3,Smarcc2,Smarcd1,Smarce1
GO.0044309	neuron spine	15	0.0126	ENSMUSP00000000335,ENSMUSP00000021045,ENSMUSP00000022429,ENSMUSP00000023758,ENSMUSP00000026436,ENSMUSP00000027178,ENSMUSP00000028465,ENSMUSP00000034211,ENSMUSP00000040596,ENSMUSP00000043522,ENSMUSP00000083077,ENSMUSP00000088089,ENSMUSP00000093536,ENSMUSP00000095195,ENSMUSP00000125415	Accn1,Accn2,Adora1,Als2,Arf4,Atp1a2,Baiap2,Comt,Cttnbp2,Grid2,Mob4,Mt3,P2rx3,Palm,Srgap2
GO.0005952	cAMP-dependent protein kinase complex	4	0.0131	ENSMUSP00000005606,ENSMUSP00000026973,ENSMUSP00000035220,ENSMUSP00000088336	Prkaca,Prkar1b,Prkar2a,Rapgef4
GO.0030424	axon	36	0.0131	ENSMUSP00000000335,ENSMUSP00000009727,ENSMUSP00000020400,ENSMUSP00000023509,ENSMUSP00000026985,ENSMUSP00000027038,ENSMUSP00000027178,ENSMUSP00000030412,ENSMUSP00000030536,ENSMUSP00000030628,ENSMUSP00000030714,ENSMUSP00000032487,ENSMUSP00000032508,ENSMUSP00000033761,ENSMUSP00000034211,ENSMUSP00000036721,ENSMUSP00000040596,ENSMUSP00000043340,ENSMUSP00000043522,ENSMUSP00000065877,ENSMUSP00000069429,…	Adora1,Als2,Atcay,Cntn2,Cntnap2,Comt,Cplx2,Ctnna2,Dcc,Epn1,Fkbp15,Fkbp4,Glul,Hcfc1,Homer1,Kcnc1,Kcnj11,Klhl24,Lrrtm1,Mgll,Mink1,Mt3,Ncmap,Oprk1,Palm,Pink1,Ppt1,Sdc3,Sema3a,Syn1,Syngr1,Syp,Tbc1d24,Tmem57,Tubb4a,Vamp1
GO.0044429	mitochondrial part	66	0.0131	ENSMUSP00000000642,ENSMUSP00000004560,ENSMUSP00000007482,ENSMUSP00000008684,ENSMUSP00000017332,ENSMUSP00000018186,ENSMUSP00000019721,ENSMUSP00000020580,ENSMUSP00000021183,ENSMUSP00000022908,ENSMUSP00000023071,ENSMUSP00000023448,ENSMUSP00000025014,ENSMUSP00000025696,ENSMUSP00000027125,ENSMUSP00000029147,ENSMUSP00000030536,ENSMUSP00000030583,ENSMUSP00000031099,ENSMUSP00000031822,ENSMUSP00000032172,…	Abcg2,Acaa2,Acn9,Acsl3,Acsl4,Aifm3,Ak2,Ak3,Alas2,Armcx3,Atcay,Bckdhb,Bcl2,Bid,Ccdc123,Chchd4,Chchd6,Chchd7,Ciapin1,Cnp,Coa3,Coq10b,Cyb5r3,Eral1,Exog,Grpel1,Grpel2,Hax1,Hk2,Mcl1,Mgst1,Micu1,Mrpl15,Mrpl28,Mrpl49,Mrps25,Mrps6,Mt3,Mterfd3,Nars2,Nat8l,Ndufab1,Ndufc2,Nfs1,Nlrx1,Nme1,Pde12,Pdk2,Pdk4,Pdp1,Pi4kb,Pink1,Polrmt,Rps6kb1,Samm50,Slc25a23,Slc25a32,Slc25a36,Snn,Spg20,Srgap2,Tmem11,Tmem126b,Trp53,…
GO.1903349	omegasome membrane	3	0.0138	ENSMUSP00000031490,ENSMUSP00000042224,ENSMUSP00000060892	Emc6,Ulk1,Zfyve1
GO.1903561	extracellular vesicle	183	0.0138	ENSMUSP00000000001,ENSMUSP00000000335,ENSMUSP00000001187,ENSMUSP00000001548,ENSMUSP00000001569,ENSMUSP00000001592,ENSMUSP00000001757,ENSMUSP00000001824,ENSMUSP00000001920,ENSMUSP00000002400,ENSMUSP00000002572,ENSMUSP00000002818,ENSMUSP00000003575,ENSMUSP00000004378,ENSMUSP00000004560,ENSMUSP00000004990,ENSMUSP00000005077,ENSMUSP00000005606,ENSMUSP00000005620,ENSMUSP00000005714,ENSMUSP00000008907,…	AU040320,Aasdhppt,Abhd14b,Abi2,Acaa2,Acsl4,Actn1,Adcy1,Aif1l,Ak2,Anpep,Anxa11,Anxa4,Anxa9,Aplp2,Appl1,Arf3,Arl15,Arl8a,Arrdc1,Atic,Atp1a2,Atp6v1a,B4galt5,Baiap2,Bid,Cab39l,Camk4,Capzb,Ccny,Cct4,Cd37,Cd47,Cdh11,Cdh13,Cfl1,Cfl2,Chmp3,Ckap4,Cmpk1,Cnp,Comt,Cotl1,Cpd,Crtc2,Csrp1,Ctdsp1,Cux2,Cyb5r3,Dnajb1,Dnajb4,Dnm1,Dnm2,Dusp23,Dynll1,Dysf,Eef1e1,Efr3a,Eno2,F3,Fam20a,Fam49b,Fam63a,Fkbp4,Fkbp5,Flot1,Fm…
GO.1990462	omegasome	3	0.0138	ENSMUSP00000031490,ENSMUSP00000042224,ENSMUSP00000060892	Emc6,Ulk1,Zfyve1
GO.0090544	BAF-type complex	6	0.0145	ENSMUSP00000021052,ENSMUSP00000023759,ENSMUSP00000099422,ENSMUSP00000100868,ENSMUSP00000119356,ENSMUSP00000137477	Actl6b,Dpf3,Smarcc2,Smarcd1,Smarcd2,Smarce1
GO.0044463	cell projection part	69	0.0158	ENSMUSP00000000335,ENSMUSP00000001920,ENSMUSP00000003669,ENSMUSP00000005606,ENSMUSP00000009727,ENSMUSP00000019044,ENSMUSP00000020400,ENSMUSP00000021045,ENSMUSP00000021802,ENSMUSP00000022819,ENSMUSP00000023758,ENSMUSP00000025999,ENSMUSP00000026436,ENSMUSP00000026985,ENSMUSP00000027038,ENSMUSP00000027178,ENSMUSP00000028465,ENSMUSP00000028730,ENSMUSP00000028981,ENSMUSP00000030583,ENSMUSP00000030628,…	Accn1,Accn2,Add3,Aif1l,Ak2,Alms1,Als2,Ap2a1,Atg5,Atg7,Atp1a2,Baiap2,Bves,Cap2,Ccdc123,Cfl1,Cntn2,Cntnap2,Comt,Cplx2,Ctnna2,Cttnbp2,Dclk1,Dnm2,Epn1,Fbf1,Fkbp15,Fkbp4,Glul,Gprin1,Grid2,Homer1,Homer3,Irs1,Jph4,Kcnc1,Kcnj11,Klc2,Lrrtm1,Mapre1,Mgll,Mkks,Mob2,Mob4,Mt3,Mtap4,Ncmap,Nme1,Oprk1,P2rx3,Pdpk1,Prkaca,Rasgrp2,Slc22a5,Spata6,Srgap2,Syn1,Syngr1,Syp,Tbc1d24,Tmem57,Tpm1,Tubb4a,Ube2k,Unc119b,Ush2a,U…
GO.0030014	CCR4-NOT complex	5	0.016	ENSMUSP00000020624,ENSMUSP00000034012,ENSMUSP00000039098,ENSMUSP00000078690,ENSMUSP00000108629	Cnot3,Cnot6,Cnot6l,Cnot7,Cpeb3
GO.0005813	centrosome	43	0.0181	ENSMUSP00000000001,ENSMUSP00000001569,ENSMUSP00000005606,ENSMUSP00000009157,ENSMUSP00000020775,ENSMUSP00000020904,ENSMUSP00000021091,ENSMUSP00000022115,ENSMUSP00000022595,ENSMUSP00000024869,ENSMUSP00000025729,ENSMUSP00000027178,ENSMUSP00000028517,ENSMUSP00000028730,ENSMUSP00000028981,ENSMUSP00000030400,ENSMUSP00000030586,ENSMUSP00000032283,ENSMUSP00000033156,ENSMUSP00000034204,ENSMUSP00000034508,…	Alms1,Als2,Brsk1,Camk2n2,Ccdc123,Ccdc28b,Ccdc77,Ccnb2,Cct4,Cep68,Dctn5,Dnm2,Dynll1,Dynll2,Fbf1,Fbxo31,Fbxw11,Flot1,Gnai1,Gnai3,Hook2,Lrrcc1,Mapre1,Meaf6,Mkks,Mycbp,Ndn,Nfe2l2,Nme1,Nudt21,Ola1,Pafah1b1,Prkaca,Prkar2a,Rgcc,Ric8b,Rock2,Skp1a,Spast,Tnks2,Usp2,Vps37a,Xrcc4
GO.0070062	extracellular exosome	181	0.0182	ENSMUSP00000000001,ENSMUSP00000000335,ENSMUSP00000001187,ENSMUSP00000001548,ENSMUSP00000001569,ENSMUSP00000001592,ENSMUSP00000001757,ENSMUSP00000001824,ENSMUSP00000001920,ENSMUSP00000002400,ENSMUSP00000002572,ENSMUSP00000002818,ENSMUSP00000003575,ENSMUSP00000004378,ENSMUSP00000004560,ENSMUSP00000004990,ENSMUSP00000005077,ENSMUSP00000005606,ENSMUSP00000005620,ENSMUSP00000005714,ENSMUSP00000008907,…	AU040320,Aasdhppt,Abhd14b,Abi2,Acaa2,Acsl4,Actn1,Adcy1,Aif1l,Ak2,Anpep,Anxa11,Anxa4,Anxa9,Aplp2,Appl1,Arf3,Arl15,Arl8a,Arrdc1,Atic,Atp6v1a,B4galt5,Baiap2,Bid,Cab39l,Camk4,Capzb,Ccny,Cct4,Cd37,Cd47,Cdh11,Cdh13,Cfl1,Cfl2,Chmp3,Ckap4,Cmpk1,Cnp,Comt,Cotl1,Cpd,Crtc2,Csrp1,Ctdsp1,Cux2,Cyb5r3,Dnajb1,Dnajb4,Dnm1,Dnm2,Dusp23,Dynll1,Dysf,Eef1e1,Efr3a,Eno2,F3,Fam20a,Fam49b,Fam63a,Fkbp4,Fkbp5,Flot1,Fmnl1,Fol…
GO.0060076	excitatory synapse	6	0.0184	ENSMUSP00000001548,ENSMUSP00000020400,ENSMUSP00000053097,ENSMUSP00000069429,ENSMUSP00000078093,ENSMUSP00000089225	Homer1,Itga3,Lrrtm1,Lrrtm2,Nlgn2,Syp
GO.0005635	nuclear envelope	34	0.0193	ENSMUSP00000000632,ENSMUSP00000001187,ENSMUSP00000019859,ENSMUSP00000021091,ENSMUSP00000021574,ENSMUSP00000022416,ENSMUSP00000025729,ENSMUSP00000028426,ENSMUSP00000028465,ENSMUSP00000028763,ENSMUSP00000030628,ENSMUSP00000032719,ENSMUSP00000034285,ENSMUSP00000039529,ENSMUSP00000040287,ENSMUSP00000041347,ENSMUSP00000042852,ENSMUSP00000046540,ENSMUSP00000050289,ENSMUSP00000052905,ENSMUSP00000059289,…	Agpat5,Anxa11,Anxa4,Bcl2,Cotl1,Ctdnep1,Eif5a2,Eny2,Gle1,Gtpbp4,Hax1,Ina,Kcnj11,Lass6,Ltc4s,Mcm3ap,Nav3,Nelf,Nup160,Nup188,Nup50,Nup54,P2rx3,Pafah1b1,Smad1,Tfdp2,Tmem109,Tmem33,Tmem57,Tnks2,Tnrc18,Tyro3,Wdr3,Zfp354c
GO.0031414	N-terminal protein acetyltransferase complex	4	0.0195	ENSMUSP00000022038,ENSMUSP00000022597,ENSMUSP00000041450,ENSMUSP00000070140	Naa16,Naa30,Naa35,Naa50
GO.0005740	mitochondrial envelope	51	0.0198	ENSMUSP00000000642,ENSMUSP00000004560,ENSMUSP00000008684,ENSMUSP00000017332,ENSMUSP00000018186,ENSMUSP00000019721,ENSMUSP00000021183,ENSMUSP00000022908,ENSMUSP00000023071,ENSMUSP00000023448,ENSMUSP00000027125,ENSMUSP00000030536,ENSMUSP00000030583,ENSMUSP00000031822,ENSMUSP00000032172,ENSMUSP00000032843,ENSMUSP00000032882,ENSMUSP00000033157,ENSMUSP00000033634,ENSMUSP00000034211,ENSMUSP00000034621,…	Abcg2,Acaa2,Acn9,Acsl3,Acsl4,Aifm3,Ak2,Alas2,Armcx3,Atcay,Bckdhb,Bcl2,Bid,Ccdc123,Chchd4,Chchd6,Chchd7,Ciapin1,Cnp,Coa3,Coq10b,Cyb5r3,Eral1,Exog,Grpel2,Hax1,Hk2,Mcl1,Mgst1,Micu1,Mt3,Nat8l,Ndufab1,Ndufc2,Nlrx1,Nme1,Pdk4,Pi4kb,Pink1,Rps6kb1,Samm50,Slc25a23,Slc25a32,Slc25a36,Snn,Spg20,Srgap2,Tmem11,Tmem126b,Txnip,Vat1
GO.0008180	COP9 signalosome	7	0.0207	ENSMUSP00000001569,ENSMUSP00000009157,ENSMUSP00000021090,ENSMUSP00000028222,ENSMUSP00000028635,ENSMUSP00000108058,ENSMUSP00000108455	Amot,Cops2,Cops7a,Dynll1,Flot1,Grb2,Hspa5
GO.0098793	presynapse	18	0.0214	ENSMUSP00000009727,ENSMUSP00000025110,ENSMUSP00000025830,ENSMUSP00000030412,ENSMUSP00000032279,ENSMUSP00000032487,ENSMUSP00000034211,ENSMUSP00000039517,ENSMUSP00000040062,ENSMUSP00000043522,ENSMUSP00000069284,ENSMUSP00000069429,ENSMUSP00000078198,ENSMUSP00000080568,ENSMUSP00000088089,ENSMUSP00000088464,ENSMUSP00000109639,ENSMUSP00000132945	Adora1,Apba1,Brsk1,Cacfd1,Cttnbp2,Erc1,Ica1,Mt3,Pi4k2a,Ppt1,Rab3c,Rph3a,Syn1,Syngr1,Syp,Syt11,Syt4,Vamp1
GO.0043197	dendritic spine	14	0.0247	ENSMUSP00000000335,ENSMUSP00000021045,ENSMUSP00000022429,ENSMUSP00000023758,ENSMUSP00000026436,ENSMUSP00000027178,ENSMUSP00000028465,ENSMUSP00000034211,ENSMUSP00000043522,ENSMUSP00000083077,ENSMUSP00000088089,ENSMUSP00000093536,ENSMUSP00000095195,ENSMUSP00000125415	Accn1,Accn2,Adora1,Als2,Arf4,Atp1a2,Baiap2,Comt,Cttnbp2,Grid2,Mob4,Mt3,P2rx3,Srgap2
GO.0000228	nuclear chromosome	38	0.0277	ENSMUSP00000000129,ENSMUSP00000000767,ENSMUSP00000002825,ENSMUSP00000003876,ENSMUSP00000009120,ENSMUSP00000012612,ENSMUSP00000016452,ENSMUSP00000018333,ENSMUSP00000020004,ENSMUSP00000020657,ENSMUSP00000021052,ENSMUSP00000023206,ENSMUSP00000025642,ENSMUSP00000025999,ENSMUSP00000028098,ENSMUSP00000029448,ENSMUSP00000030138,ENSMUSP00000034022,ENSMUSP00000034405,ENSMUSP00000034755,ENSMUSP00000041370,…	Add3,Asf1a,Atrx,Baz1b,Brd8,Ercc4,Fer,Gabpa,Gatad2b,Jund,Kdm2a,Morf4l1,Mre11a,Nelf,Nol6,Orc4,Pole4,Polr2a,Pot1a,Prpf19,Rpa1,Rpa2,Sap30,Smarcc2,Smarcd2,Smarce1,Suv39h1,Suv420h1,Sycp1,Tardbp,Tcf12,Tcf3,Trp53,Ube2a,Ube2b,Uchl5,Zfp385a,Zmiz2
GO.0016363	nuclear matrix	13	0.0277	ENSMUSP00000021428,ENSMUSP00000025444,ENSMUSP00000030623,ENSMUSP00000045369,ENSMUSP00000059211,ENSMUSP00000068529,ENSMUSP00000077262,ENSMUSP00000082652,ENSMUSP00000095857,ENSMUSP00000097908,ENSMUSP00000104298,ENSMUSP00000112259,ENSMUSP00000125003	Anp32a,Cfl1,Cfl2,Cxxc1,Ercc8,Ndn,Nelf,Runx1t1,Sfpq,Snw1,Srrm1,Tgfb1i1,Trp53
GO.0000785	chromatin	37	0.0296	ENSMUSP00000000129,ENSMUSP00000002825,ENSMUSP00000003876,ENSMUSP00000009120,ENSMUSP00000016452,ENSMUSP00000018333,ENSMUSP00000020004,ENSMUSP00000020657,ENSMUSP00000021052,ENSMUSP00000030536,ENSMUSP00000030623,ENSMUSP00000033597,ENSMUSP00000034022,ENSMUSP00000034755,ENSMUSP00000039422,ENSMUSP00000040287,ENSMUSP00000041370,ENSMUSP00000043643,ENSMUSP00000047683,ENSMUSP00000054763,ENSMUSP00000056359,…	Asf1a,Atrx,Bahcc1,Baz1b,Bcas3,Brd8,Fer,Gabpa,Gatad2b,Hmga1,Hmgn5,Jund,Kdm2a,Mau2,Morf4l1,Nelf,Nfe2l2,Pink1,Polr2a,Rpa2,Sap30,Sfpq,Shprh,Smarcc2,Smarcd2,Smarce1,Suv39h1,Tardbp,Tcf12,Tcf3,Tnrc18,Trp53,Ube2a,Ube2b,Uchl5,Wdr61,Zfp385a
GO.0005815	microtubule organizing center	52	0.0313	ENSMUSP00000000001,ENSMUSP00000001569,ENSMUSP00000005606,ENSMUSP00000009157,ENSMUSP00000020775,ENSMUSP00000020904,ENSMUSP00000021091,ENSMUSP00000022115,ENSMUSP00000022531,ENSMUSP00000022595,ENSMUSP00000024869,ENSMUSP00000025729,ENSMUSP00000027178,ENSMUSP00000027642,ENSMUSP00000028517,ENSMUSP00000028730,ENSMUSP00000028981,ENSMUSP00000030400,ENSMUSP00000030586,ENSMUSP00000032283,ENSMUSP00000033156,…	Alms1,Als2,Brsk1,Camk2n2,Ccdc123,Ccdc28b,Ccdc77,Ccnb2,Cct4,Cep68,Dctn5,Dnm2,Dynll1,Dynll2,Fbf1,Fbxo31,Fbxw11,Flot1,Gnai1,Gnai3,Hook2,Irs1,Lats2,Lrrcc1,Mapre1,Meaf6,Mkks,Mycbp,Ndn,Neil1,Nek7,Nfe2l2,Nme1,Nudt21,Ogt,Ola1,Pafah1b1,Pla2g6,Prkaca,Prkar2a,Ptk2,Rad26l,Rgcc,Ric8b,Rock2,Skp1a,Spast,Tnks2,Ush2a,Usp2,Vps37a,Xrcc4
GO.0005925	focal adhesion	35	0.0344	ENSMUSP00000001548,ENSMUSP00000001569,ENSMUSP00000001592,ENSMUSP00000001920,ENSMUSP00000002572,ENSMUSP00000003575,ENSMUSP00000005077,ENSMUSP00000015855,ENSMUSP00000021554,ENSMUSP00000021689,ENSMUSP00000021714,ENSMUSP00000023072,ENSMUSP00000023087,ENSMUSP00000024860,ENSMUSP00000025295,ENSMUSP00000027677,ENSMUSP00000028222,ENSMUSP00000031377,ENSMUSP00000034057,ENSMUSP00000035220,ENSMUSP00000036304,…	Actn1,Aif1l,Cdh13,Cfl1,Csrp1,Dnm2,Ehd3,Evl,Flot1,Hspa5,Hspb1,Itga3,Jup,Lap3,Lasp1,Lig4,Lpp,Mmp14,Mrc2,Palld,Parvb,Pdpk1,Pnma1,Prkar2a,Prune,Ptk2,Rpl18,Scarb2,Slc9a3r2,Spry4,Tgfb1i1,Tpm4,Twf1,Zfyve21,Zyx
GO.0005730	nucleolus	66	0.0355	ENSMUSP00000001836,ENSMUSP00000003870,ENSMUSP00000005620,ENSMUSP00000008445,ENSMUSP00000009679,ENSMUSP00000017629,ENSMUSP00000020346,ENSMUSP00000020461,ENSMUSP00000021090,ENSMUSP00000021574,ENSMUSP00000022855,ENSMUSP00000025906,ENSMUSP00000026063,ENSMUSP00000026387,ENSMUSP00000026987,ENSMUSP00000028098,ENSMUSP00000028517,ENSMUSP00000029147,ENSMUSP00000030138,ENSMUSP00000030206,ENSMUSP00000030491,…	Abhd14b,Actl6b,Bcl9l,Brix1,Camk4,Cbfa2t3,Cd3eap,Cdk12,Cdkn2aip,Ciapin1,Cmpk1,Crbn,Dclre1a,Dnajb1,Eri1,Esrra,Fbxw7,Grb2,Gtpbp4,Hmgn5,Kdm2a,Kdm2b,Krr1,Meaf6,Mob2,Mxi1,Nfic,Nfs1,Nkrf,Nol6,Nop16,Nudt16,Ola1,Orc4,Phax,Plk5,Pnma1,Pnma3,Polr3k,Pwp1,Rasl11a,Rbm4,Rcc2,Rgs2,Rnmt,Rpf2,Rpl18,Rps6ka6,Sbds,Setd8,Skp2,Slc7a5,Snapc3,Stau2,Tbca,Thap2,Top2b,Trp53,Uso1,Utp6,Wdr3,Zcchc11,Zfp207,Zfp385a,Zfp622,Zmym4
GO.0044454	nuclear chromosome part	35	0.0355	ENSMUSP00000000129,ENSMUSP00000000767,ENSMUSP00000002825,ENSMUSP00000003876,ENSMUSP00000009120,ENSMUSP00000012612,ENSMUSP00000016452,ENSMUSP00000018333,ENSMUSP00000020004,ENSMUSP00000020657,ENSMUSP00000021052,ENSMUSP00000023206,ENSMUSP00000025642,ENSMUSP00000028098,ENSMUSP00000029448,ENSMUSP00000034022,ENSMUSP00000034405,ENSMUSP00000034755,ENSMUSP00000041370,ENSMUSP00000047683,ENSMUSP00000071200,…	Asf1a,Baz1b,Brd8,Ercc4,Fer,Gabpa,Gatad2b,Jund,Kdm2a,Morf4l1,Mre11a,Nelf,Orc4,Pole4,Polr2a,Pot1a,Prpf19,Rpa1,Rpa2,Sap30,Smarcc2,Smarcd2,Smarce1,Suv39h1,Suv420h1,Sycp1,Tardbp,Tcf12,Tcf3,Trp53,Ube2a,Ube2b,Uchl5,Zfp385a,Zmiz2
GO.0008021	synaptic vesicle	16	0.0356	ENSMUSP00000009727,ENSMUSP00000025110,ENSMUSP00000025830,ENSMUSP00000030412,ENSMUSP00000032487,ENSMUSP00000034211,ENSMUSP00000039517,ENSMUSP00000040062,ENSMUSP00000069284,ENSMUSP00000069429,ENSMUSP00000078198,ENSMUSP00000080568,ENSMUSP00000088089,ENSMUSP00000088464,ENSMUSP00000109639,ENSMUSP00000132945	Apba1,Brsk1,Cacfd1,Cttnbp2,Ica1,Mt3,Pi4k2a,Ppt1,Rab3c,Rph3a,Syn1,Syngr1,Syp,Syt11,Syt4,Vamp1
GO.0005913	cell-cell adherens junction	9	0.0373	ENSMUSP00000001569,ENSMUSP00000001592,ENSMUSP00000021554,ENSMUSP00000023334,ENSMUSP00000058754,ENSMUSP00000070427,ENSMUSP00000074606,ENSMUSP00000101654,ENSMUSP00000124376	Abi2,Actn1,Ctnna2,Ctnna3,Flot1,Jup,Pkp3,Pvrl3,Zyx
GO.0031201	SNARE complex	8	0.0373	ENSMUSP00000002818,ENSMUSP00000005954,ENSMUSP00000021329,ENSMUSP00000026985,ENSMUSP00000032487,ENSMUSP00000052262,ENSMUSP00000057462,ENSMUSP00000109761	Bloc1s6,Cplx2,Gosr2,Stx18,Vamp1,Vamp7,Vti1b,Ykt6
GO.0030135	coated vesicle	16	0.0377	ENSMUSP00000014892,ENSMUSP00000021329,ENSMUSP00000022196,ENSMUSP00000027837,ENSMUSP00000031355,ENSMUSP00000035158,ENSMUSP00000038368,ENSMUSP00000057462,ENSMUSP00000063277,ENSMUSP00000068349,ENSMUSP00000068487,ENSMUSP00000090844,ENSMUSP00000102985,ENSMUSP00000103483,ENSMUSP00000126092,ENSMUSP00000133564	AY007814,Ap1g1,Ap3b1,Clta,Copg2,Dnm2,Furin,Gosr2,Pik3c2a,Rab27b,Tex261,Tgoln1,Trf,Uso1,Vangl2,Vti1b
GO.0044448	cell cortex part	13	0.0384	ENSMUSP00000003575,ENSMUSP00000021554,ENSMUSP00000028981,ENSMUSP00000039416,ENSMUSP00000042123,ENSMUSP00000077273,ENSMUSP00000091317,ENSMUSP00000094505,ENSMUSP00000097908,ENSMUSP00000099565,ENSMUSP00000112259,ENSMUSP00000115882,ENSMUSP00000125312	Actn1,Asph,Capzb,Cfl1,Exoc3,Exoc6b,Lasp1,Mapre1,Med28,Myadm,Nelf,Pls1,Tpm4
GO.0000502	proteasome complex	10	0.0388	ENSMUSP00000003911,ENSMUSP00000005077,ENSMUSP00000018333,ENSMUSP00000022380,ENSMUSP00000022993,ENSMUSP00000030134,ENSMUSP00000033805,ENSMUSP00000045460,ENSMUSP00000103161,ENSMUSP00000120461	Derl1,Hspb1,Psmc6,Psmd10,Psme4,Rad23a,Rad23b,Ube3a,Ubl4,Uchl5
GO.0070603	SWI/SNF superfamily-type complex	10	0.0388	ENSMUSP00000003876,ENSMUSP00000018333,ENSMUSP00000021052,ENSMUSP00000023759,ENSMUSP00000042875,ENSMUSP00000099422,ENSMUSP00000100868,ENSMUSP00000109203,ENSMUSP00000119356,ENSMUSP00000137477	Actl6b,Appl1,Atrx,Brd8,Dpf3,Smarcc2,Smarcd1,Smarcd2,Smarce1,Uchl5
GO.0030658	transport vesicle membrane	9	0.0404	ENSMUSP00000000910,ENSMUSP00000021329,ENSMUSP00000031355,ENSMUSP00000040062,ENSMUSP00000052262,ENSMUSP00000057462,ENSMUSP00000090987,ENSMUSP00000102985,ENSMUSP00000103483	Clta,Dbh,Furin,Gosr2,Ica1,Spred2,Uso1,Vamp7,Vti1b
GO.0019898	extrinsic component of membrane	26	0.0418	ENSMUSP00000000001,ENSMUSP00000000129,ENSMUSP00000001592,ENSMUSP00000005798,ENSMUSP00000005954,ENSMUSP00000029047,ENSMUSP00000030080,ENSMUSP00000030811,ENSMUSP00000031490,ENSMUSP00000034198,ENSMUSP00000035037,ENSMUSP00000042224,ENSMUSP00000046557,ENSMUSP00000052522,ENSMUSP00000068716,ENSMUSP00000074259,ENSMUSP00000078198,ENSMUSP00000102152,ENSMUSP00000105663,ENSMUSP00000105970,ENSMUSP00000106018,…	Bcl2l11,Bloc1s6,Errfi1,Fer,Frmd5,Gnai1,Gnai3,Gnao1,Gng12,Gphn,Hid1,Jup,Matk,Mgll,Ncf1,Pik3c2a,Pik3cb,Pik3r6,Ptk2,Rph3a,Snx16,Snx30,Snx6,Ulk1,Vps13a,Zfyve1
GO.0034399	nuclear periphery	14	0.0418	ENSMUSP00000021428,ENSMUSP00000025444,ENSMUSP00000030623,ENSMUSP00000045369,ENSMUSP00000059211,ENSMUSP00000068529,ENSMUSP00000077262,ENSMUSP00000082652,ENSMUSP00000095857,ENSMUSP00000097908,ENSMUSP00000104298,ENSMUSP00000111301,ENSMUSP00000112259,ENSMUSP00000125003	Anp32a,Cfl1,Cfl2,Cxxc1,Ercc8,Ndn,Nelf,Runx1t1,Sfpq,Snw1,Srrm1,Suv39h1,Tgfb1i1,Trp53
GO.0005769	early endosome	25	0.0422	ENSMUSP00000001569,ENSMUSP00000005798,ENSMUSP00000022993,ENSMUSP00000027178,ENSMUSP00000028049,ENSMUSP00000028238,ENSMUSP00000029047,ENSMUSP00000031029,ENSMUSP00000032635,ENSMUSP00000034713,ENSMUSP00000035158,ENSMUSP00000038144,ENSMUSP00000042875,ENSMUSP00000044482,ENSMUSP00000051263,ENSMUSP00000053384,ENSMUSP00000067496,ENSMUSP00000068410,ENSMUSP00000069284,ENSMUSP00000075619,ENSMUSP00000080579,…	Als2,Appl1,Chmp3,Cntnap2,Ctss,Derl1,Dysf,ENSMUSG00000030982,Fkbp15,Flot1,Furin,Ldlr,Nipa2,Pi4k2a,Rab14,Rabep1,Rabgap1l,Rcc2,Siah2,Snx16,Snx17,Snx6,Trak1,Trf,Trim3
GO.0005862	muscle thin filament tropomyosin	2	0.0426	ENSMUSP00000051888,ENSMUSP00000103546	Tpm1,Tpm2
GO.0030529	ribonucleoprotein complex	54	0.0426	ENSMUSP00000002683,ENSMUSP00000007482,ENSMUSP00000019614,ENSMUSP00000020681,ENSMUSP00000020904,ENSMUSP00000021428,ENSMUSP00000022038,ENSMUSP00000023813,ENSMUSP00000024260,ENSMUSP00000025014,ENSMUSP00000025642,ENSMUSP00000029804,ENSMUSP00000030138,ENSMUSP00000030348,ENSMUSP00000030436,ENSMUSP00000031349,ENSMUSP00000031978,ENSMUSP00000033927,ENSMUSP00000034012,ENSMUSP00000034211,ENSMUSP00000034981,…	Atxn2l,Ccdc97,Cirbp,Cnot3,Cnot7,Cpsf6,Eri1,Ina,Isy1,Krr1,Lsm11,Luc7l,Magoh,Metap1,Mrpl15,Mrpl28,Mrpl49,Mrps25,Mrps33,Mrps6,Mt3,Naa35,Nck1,Nol6,Nufip2,Ogfod1,Pcbp4,Pnrc2,Prpf19,Psma2,Rbm4,Rbm5,Rnpc3,Rock2,Rpl18,Rpl27a,Sf1,Sf3a2,Slu7,Snrnp35,Snrnp70,Snrpn,Snw1,Sqstm1,Srrm1,Syncrip,Tarbp2,Tia1,Trove2,Utp6,Wdr3,Xab2,Xrn1,Ythdf2
GO.0032807	DNA ligase IV complex	2	0.0426	ENSMUSP00000022115,ENSMUSP00000093130	Lig4,Xrcc4
GO.0033267	axon part	19	0.0426	ENSMUSP00000009727,ENSMUSP00000026985,ENSMUSP00000027038,ENSMUSP00000028465,ENSMUSP00000032487,ENSMUSP00000032508,ENSMUSP00000043340,ENSMUSP00000043522,ENSMUSP00000069429,ENSMUSP00000071135,ENSMUSP00000080568,ENSMUSP00000083375,ENSMUSP00000083707,ENSMUSP00000094989,ENSMUSP00000101486,ENSMUSP00000110288,ENSMUSP00000124938,ENSMUSP00000127374,ENSMUSP00000136002	Adora1,Cntn2,Cntnap2,Cplx2,Epn1,Fkbp4,Glul,Kcnc1,Kcnj11,Mgll,Ncmap,Oprk1,P2rx3,Syn1,Syngr1,Syp,Tbc1d24,Tubb4a,Vamp1
GO.0044614	nuclear pore cytoplasmic filaments	2	0.0426	ENSMUSP00000003310,ENSMUSP00000057771	Ranbp2,Rangap1
GO.0031984	organelle subcompartment	27	0.0434	ENSMUSP00000022196,ENSMUSP00000028238,ENSMUSP00000029141,ENSMUSP00000029738,ENSMUSP00000031355,ENSMUSP00000032879,ENSMUSP00000038350,ENSMUSP00000039819,ENSMUSP00000040222,ENSMUSP00000041110,ENSMUSP00000042224,ENSMUSP00000047449,ENSMUSP00000051248,ENSMUSP00000052262,ENSMUSP00000054033,ENSMUSP00000054309,ENSMUSP00000066891,ENSMUSP00000068349,ENSMUSP00000068487,ENSMUSP00000077273,ENSMUSP00000085405,…	Ap1g1,Ap3b1,Asph,Atg9a,B4galt5,Csgalnact2,Dnm2,Gcc2,Gpr89,Hid1,Lap3,Lnp,Mmp24,Mob4,Myo18a,Nmnat2,Pitpnm1,Rab14,Rab27b,Rab30,Scamp2,Sulf2,Tgoln1,Uso1,Vamp7,Vcpip1,Zfyve1
GO.0042382	paraspeckles	3	0.0437	ENSMUSP00000030623,ENSMUSP00000034204,ENSMUSP00000068408	Cpsf6,Nudt21,Sfpq
GO.0071204	histone pre-mRNA 3 end processing complex	3	0.0437	ENSMUSP00000033927,ENSMUSP00000057343,ENSMUSP00000133649	Eri1,Lsm11,Syncrip
GO.1990391	DNA repair complex	6	0.0445	ENSMUSP00000022115,ENSMUSP00000023206,ENSMUSP00000030134,ENSMUSP00000059211,ENSMUSP00000093130,ENSMUSP00000093462	Ercc4,Ercc8,Lig4,Pole4,Rad23b,Xrcc4
GO.0005773	vacuole	44	0.0481	ENSMUSP00000000001,ENSMUSP00000001569,ENSMUSP00000005815,ENSMUSP00000016678,ENSMUSP00000022196,ENSMUSP00000022416,ENSMUSP00000023295,ENSMUSP00000026985,ENSMUSP00000027414,ENSMUSP00000027684,ENSMUSP00000028238,ENSMUSP00000029047,ENSMUSP00000030412,ENSMUSP00000030434,ENSMUSP00000031377,ENSMUSP00000031490,ENSMUSP00000031621,ENSMUSP00000032065,ENSMUSP00000033621,ENSMUSP00000034215,ENSMUSP00000034713,…	Acr,Anpep,Anxa11,Ap3b1,Arl8a,Atg5,Atg9a,Atp11c,Atp6v1a,Ccz1,Cplx2,Ctss,Fgfr3,Flot1,Fnbp1,Fuca1,Gla,Gnai1,Gnai3,Hbxip,Kit,Lamp2,Laptm5,Ldlr,Lnpep,Mt1,Pcyox1,Pi4k2a,Ppt1,Rab14,Rab2a,Rpn2,Scarb2,Snx16,Sppl2b,Sqstm1,Stk11ip,Tecpr1,Ulk1,Vamp7,Vti1b,Wdr41,Wdr48,Zfyve1
GO.0043025	neuronal cell body	34	0.0481	ENSMUSP00000004378,ENSMUSP00000008445,ENSMUSP00000021045,ENSMUSP00000023509,ENSMUSP00000026436,ENSMUSP00000026985,ENSMUSP00000027038,ENSMUSP00000027178,ENSMUSP00000028465,ENSMUSP00000030412,ENSMUSP00000031490,ENSMUSP00000031519,ENSMUSP00000032508,ENSMUSP00000033634,ENSMUSP00000033761,ENSMUSP00000043522,ENSMUSP00000057573,ENSMUSP00000067496,ENSMUSP00000067552,ENSMUSP00000071135,ENSMUSP00000074751,…	Accn1,Acsl4,Adora1,Als2,Baiap2,Cabp1,Cntn2,Cntnap2,Cplx2,Creb3,Eno2,Fbxo31,Fkbp4,Glul,Hcfc1,Homer1,Iglon5,Kcnc1,Kcnj11,Klhl24,Lsamp,Mob4,Nelf,Nell2,Oprk1,P2rx3,Phax,Ppt1,Siah2,Slc31a1,Srr,Tubb4a,Ulk1,Zfp385a
GO.0030863	cortical cytoskeleton	10	0.0485	ENSMUSP00000003575,ENSMUSP00000021554,ENSMUSP00000028981,ENSMUSP00000042123,ENSMUSP00000091317,ENSMUSP00000094505,ENSMUSP00000097908,ENSMUSP00000099565,ENSMUSP00000112259,ENSMUSP00000115882	Actn1,Capzb,Cfl1,Lasp1,Mapre1,Med28,Myadm,Nelf,Pls1,Tpm4
GO.0000109	nucleotide-excision repair complex	4	0.0487	ENSMUSP00000023206,ENSMUSP00000030134,ENSMUSP00000059211,ENSMUSP00000093462	Ercc4,Ercc8,Pole4,Rad23b
GO.0097386	glial cell projection	4	0.0487	ENSMUSP00000030536,ENSMUSP00000034211,ENSMUSP00000064691,ENSMUSP00000083375	Gfap,Glul,Mt3,Pink1
