# Supplementary material for: Progression of pathology in PINK1-deficient mouse brain from splicing via ubiquitination, ER stress, and mitophagy changes to neuroinflammation
Source: J Neuroinflammation. 2017 Aug 2;14:154. doi: 10.1186/s12974-017-0928-0 (PMC5541666; doi:10.1186/s12974-017-0928-0)
Supplement: Supplementary file 3 — STRING bioinformatics assessment of all significant changes, including subtle effects. Ranked list of the significant transcript expression changes in PINK1-deficient mouse cerebellar tissue at ages 6 weeks, 6 months, and 18 months, which were used as input for the STRING analysis (A). Significant functional enrichments in the protein-protein-interaction network according to the STRING database is shown regarding GO Cellular component at 6 weeks with all factors of AdjPvalue <0.05 (B), 6 months with all factors of AdjPvalue <0.05 (C), and 18 months with all factors of AdjPvalue <0.01, with the term “intracellular membrane-bounded organelle” being prominent at all 3 ages (D). Prominent enrichments were highlighted in yellow color. In GO Molecular Process at 18 months with all factors of AdjPvalue <0.01 the relevance of stimulus- and stress-dependent pathways is apparent, e.g., endoplasmic reticulum stress, and a significant enrichment of mitophagy factors appears here in lines 495 and 518 (E). Among KEGG pathways at 18 months with all factors of AdjPvalue <0.01, the highest ranked pathways include “MAPK signaling”, “Ubiquitin-mediated proteolysis”, “Protein processing in endoplasmic reticulum” and “Bacterial invasion of epithelial cells” (F). Orange color was used to highlight some MAPK-dependent synaptic signaling pathways with significant enrichment, purple color was used for ubiquitination and protein processing pathways, green color was used for neuroinflammation pathways. (ZIP 366 kb) [file 12974_2017_928_MOESM3_ESM.zip › TorresAuburger-SupplTableS2D.xls]

## Sheet: Pink1KOcbll18mo-GOcellComponent
#pathway ID	pathway description	observed gene count	false discovery rate
GO.0005622	intracellular	1225	5.15e-76
GO.0044424	intracellular part	1204	1.69e-75
GO.0043229	intracellular organelle	1098	6.96e-70
GO.0043231	intracellular membrane-bounded organelle	1031	6.34e-67
GO.0005737	cytoplasm	1030	8.48e-67
GO.0043227	membrane-bounded organelle	1108	2.22e-66
GO.0043226	organelle	1154	2.04e-65
GO.0005623	cell	1281	4.68e-65
GO.0044464	cell part	1278	6.12e-65
GO.0044446	intracellular organelle part	771	6.67e-51
GO.0005575	cellular_component	1345	7.88e-51
GO.0044422	organelle part	785	2.28e-50
GO.0044444	cytoplasmic part	716	4.97e-42
GO.0005634	nucleus	678	8.17e-41
GO.0012505	endomembrane system	404	3.35e-30
GO.0016020	membrane	753	8.18e-23
GO.0044428	nuclear part	385	6.93e-21
GO.0031090	organelle membrane	325	7.02e-21
GO.0098588	bounding membrane of organelle	263	3.54e-20
GO.0043234	protein complex	413	5.39e-20
GO.0032991	macromolecular complex	459	3.1e-18
GO.0031974	membrane-enclosed lumen	385	4.37e-18
GO.0070013	intracellular organelle lumen	377	9.32e-18
GO.0043233	organelle lumen	378	1.08e-17
GO.0005794	Golgi apparatus	172	1.72e-15
GO.0043228	non-membrane-bounded organelle	372	2.37e-15
GO.0043232	intracellular non-membrane-bounded organelle	372	2.37e-15
GO.0005829	cytosol	220	6.45e-15
GO.0044431	Golgi apparatus part	110	2.83e-14
GO.0031981	nuclear lumen	328	3.57e-14
GO.0005654	nucleoplasm	270	2.75e-13
GO.0005856	cytoskeleton	216	6.06e-13
GO.0000139	Golgi membrane	89	9.81e-13
GO.0031988	membrane-bounded vesicle	341	6.44e-12
GO.0030054	cell junction	146	6.09e-11
GO.0005783	endoplasmic reticulum	174	1.42e-10
GO.0048471	perinuclear region of cytoplasm	91	2.28e-10
GO.0045202	synapse	98	2.29e-10
GO.0031982	vesicle	343	2.4e-10
GO.0097458	neuron part	140	8.75e-10
GO.0098805	whole membrane	201	1.27e-09
GO.1902494	catalytic complex	119	2.32e-09
GO.0044430	cytoskeletal part	154	2.6e-09
GO.0043005	neuron projection	114	3.44e-09
GO.0044456	synapse part	80	6.05e-09
GO.0042995	cell projection	187	1.74e-08
GO.0031410	cytoplasmic vesicle	129	2.09e-08
GO.0016023	cytoplasmic membrane-bounded vesicle	119	2.94e-08
GO.0005635	nuclear envelope	59	3.03e-08
GO.0015630	microtubule cytoskeleton	126	3.16e-08
GO.0044432	endoplasmic reticulum part	119	5.56e-08
GO.0005739	mitochondrion	184	8.07e-08
GO.0005768	endosome	90	2.36e-07
GO.1990234	transferase complex	81	2.62e-07
GO.0044425	membrane part	515	2.92e-07
GO.0044433	cytoplasmic vesicle part	62	2.92e-07
GO.0070062	extracellular exosome	262	4.14e-07
GO.0065010	extracellular membrane-bounded organelle	262	4.74e-07
GO.1903561	extracellular vesicle	262	6.3e-07
GO.0005789	endoplasmic reticulum membrane	104	7.05e-07
GO.0043230	extracellular organelle	262	7.08e-07
GO.0031965	nuclear membrane	43	8.8e-07
GO.0042175	nuclear outer membrane-endoplasmic reticulum membrane network	105	1.03e-06
GO.0071944	cell periphery	365	1.76e-06
GO.0005773	vacuole	72	2.11e-06
GO.0005886	plasma membrane	356	3.56e-06
GO.0005912	adherens junction	64	3.56e-06
GO.0031967	organelle envelope	109	6.05e-06
GO.0031975	envelope	109	6.71e-06
GO.0098794	postsynapse	53	7.14e-06
GO.0015629	actin cytoskeleton	55	1.09e-05
GO.0005769	early endosome	41	1.39e-05
GO.0070161	anchoring junction	64	1.39e-05
GO.0030425	dendrite	59	1.84e-05
GO.0019898	extrinsic component of membrane	42	2.08e-05
GO.0098796	membrane protein complex	103	2.72e-05
GO.0031201	SNARE complex	14	3.18e-05
GO.0031984	organelle subcompartment	43	3.66e-05
GO.0012506	vesicle membrane	51	4.09e-05
GO.0008021	synaptic vesicle	26	4.16e-05
GO.0098793	presynapse	28	4.16e-05
GO.0005815	microtubule organizing center	77	4.23e-05
GO.0010008	endosome membrane	47	4.4e-05
GO.0005874	microtubule	51	4.62e-05
GO.0005774	vacuolar membrane	42	4.87e-05
GO.0044440	endosomal part	48	5.24e-05
GO.0044437	vacuolar part	43	5.51e-05
GO.0030659	cytoplasmic vesicle membrane	48	7.41e-05
GO.0000323	lytic vacuole	59	8.38e-05
GO.0005764	lysosome	59	8.38e-05
GO.0005925	focal adhesion	52	0.000109
GO.0030055	cell-substrate junction	53	0.000109
GO.0005924	cell-substrate adherens junction	52	0.000162
GO.0005813	centrosome	60	0.000252
GO.0044451	nucleoplasm part	78	0.00032
GO.0098791	Golgi subcompartment	39	0.00032
GO.0030424	axon	49	0.000395
GO.0044463	cell projection part	93	0.000519
GO.0061695	transferase complex, transferring phosphorus-containing groups	31	0.00064
GO.0030672	synaptic vesicle membrane	14	0.00068
GO.0036477	somatodendritic compartment	70	0.000845
GO.0097060	synaptic membrane	36	0.00139
GO.0005793	endoplasmic reticulum-Golgi intermediate compartment	16	0.00187
GO.0045211	postsynaptic membrane	31	0.00187
GO.0005765	lysosomal membrane	33	0.00191
GO.0005643	nuclear pore	12	0.00254
GO.1902710	GABA receptor complex	4	0.00265
GO.0008076	voltage-gated potassium channel complex	14	0.00325
GO.0005938	cell cortex	30	0.00374
GO.0031901	early endosome membrane	16	0.00399
GO.0031414	N-terminal protein acetyltransferase complex	5	0.00413
GO.0034705	potassium channel complex	14	0.00448
GO.0005884	actin filament	13	0.00458
GO.0008287	protein serine/threonine phosphatase complex	10	0.00466
GO.0031968	organelle outer membrane	25	0.00516
GO.0005776	autophagosome	13	0.00532
GO.0030017	sarcomere	25	0.00561
GO.0031252	cell leading edge	42	0.00601
GO.0098589	membrane region	103	0.00626
GO.0008385	IkappaB kinase complex	4	0.0066
GO.0019867	outer membrane	25	0.00662
GO.0005730	nucleolus	86	0.00678
GO.0098797	plasma membrane protein complex	50	0.00678
GO.0005802	trans-Golgi network	24	0.00768
GO.0031519	PcG protein complex	10	0.00856
GO.0005819	spindle	35	0.00919
GO.0014069	postsynaptic density	27	0.0093
GO.0000407	pre-autophagosomal structure	9	0.00949
GO.0044306	neuron projection terminus	19	0.00996
GO.0030667	secretory granule membrane	14	0.0102
GO.0044449	contractile fiber part	25	0.0108
GO.0000151	ubiquitin ligase complex	27	0.0126
GO.0043292	contractile fiber	27	0.0135
GO.0044421	extracellular region part	298	0.0135
GO.0030016	myofibril	26	0.0148
GO.0000775	chromosome, centromeric region	24	0.0163
GO.0000109	nucleotide-excision repair complex	5	0.0169
GO.0016604	nuclear body	41	0.0169
GO.1902711	GABA-A receptor complex	3	0.0207
GO.0033116	endoplasmic reticulum-Golgi intermediate compartment membrane	9	0.021
GO.0005869	dynactin complex	4	0.0231
GO.0030496	midbody	19	0.0238
GO.0030027	lamellipodium	23	0.0241
GO.0034399	nuclear periphery	17	0.027
GO.0031301	integral component of organelle membrane	28	0.0282
GO.0032588	trans-Golgi network membrane	6	0.0282
GO.0005694	chromosome	76	0.0286
GO.0034702	ion channel complex	30	0.0294
GO.0031674	I band	18	0.0299
GO.0016607	nuclear speck	25	0.0301
GO.0043197	dendritic spine	16	0.0301
GO.0098687	chromosomal region	29	0.0301
GO.1902911	protein kinase complex	12	0.0301
GO.0009898	cytoplasmic side of plasma membrane	22	0.0318
GO.0030135	coated vesicle	19	0.0321
GO.0005790	smooth endoplasmic reticulum	7	0.0323
GO.0030175	filopodium	14	0.0324
GO.0033267	axon part	23	0.0328
GO.0035098	ESC/E(Z) complex	5	0.0328
GO.0005741	mitochondrial outer membrane	20	0.0339
GO.0044429	mitochondrial part	78	0.0339
GO.0030018	Z disc	16	0.0348
GO.0044309	neuron spine	16	0.0348
GO.0098562	cytoplasmic side of membrane	23	0.0348
GO.0005795	Golgi stack	18	0.036
GO.0030427	site of polarized growth	18	0.036
GO.0043209	myelin sheath	26	0.0382
GO.0044297	cell body	47	0.0395
GO.0031415	NatA complex	3	0.0402
GO.0019897	extrinsic component of plasma membrane	20	0.0417
GO.0005671	Ada2/Gcn5/Ada3 transcription activator complex	5	0.0418
GO.0016581	NuRD complex	5	0.0418
GO.0031300	intrinsic component of organelle membrane	28	0.0418
GO.0043679	axon terminus	16	0.0444
GO.0000776	kinetochore	17	0.0485
GO.0005788	endoplasmic reticulum lumen	16	0.0485
GO.0071782	endoplasmic reticulum tubular network	4	0.0485
GO.0072686	mitotic spindle	9	0.0487
