# Supplementary material for: Progression of pathology in PINK1-deficient mouse brain from splicing via ubiquitination, ER stress, and mitophagy changes to neuroinflammation
Source: J Neuroinflammation. 2017 Aug 2;14:154. doi: 10.1186/s12974-017-0928-0 (PMC5541666; doi:10.1186/s12974-017-0928-0)
Supplement: Supplementary file 3 — STRING bioinformatics assessment of all significant changes, including subtle effects. Ranked list of the significant transcript expression changes in PINK1-deficient mouse cerebellar tissue at ages 6 weeks, 6 months, and 18 months, which were used as input for the STRING analysis (A). Significant functional enrichments in the protein-protein-interaction network according to the STRING database is shown regarding GO Cellular component at 6 weeks with all factors of AdjPvalue <0.05 (B), 6 months with all factors of AdjPvalue <0.05 (C), and 18 months with all factors of AdjPvalue <0.01, with the term “intracellular membrane-bounded organelle” being prominent at all 3 ages (D). Prominent enrichments were highlighted in yellow color. In GO Molecular Process at 18 months with all factors of AdjPvalue <0.01 the relevance of stimulus- and stress-dependent pathways is apparent, e.g., endoplasmic reticulum stress, and a significant enrichment of mitophagy factors appears here in lines 495 and 518 (E). Among KEGG pathways at 18 months with all factors of AdjPvalue <0.01, the highest ranked pathways include “MAPK signaling”, “Ubiquitin-mediated proteolysis”, “Protein processing in endoplasmic reticulum” and “Bacterial invasion of epithelial cells” (F). Orange color was used to highlight some MAPK-dependent synaptic signaling pathways with significant enrichment, purple color was used for ubiquitination and protein processing pathways, green color was used for neuroinflammation pathways. (ZIP 366 kb) [file 12974_2017_928_MOESM3_ESM.zip › TorresAuburger-SupplTableS2E.xls]

## Sheet: Pink1KOcbll18mo-GOmolecProcess
#pathway ID	pathway description	observed gene count	false discovery rate
GO.0009987	cellular process	1088	3.56E-43
GO.0008150	biological_process	1143	8.94E-40
GO.0008152	metabolic process	848	2.34E-37
GO.0044237	cellular metabolic process	743	4.48E-35
GO.0044260	cellular macromolecule metabolic process	618	1.78E-32
GO.0071704	organic substance metabolic process	761	2.54E-31
GO.0050789	regulation of biological process	838	2.82E-31
GO.0044238	primary metabolic process	743	4.32E-31
GO.0044763	single-organism cellular process	892	7.58E-31
GO.0065007	biological regulation	864	7.58E-31
GO.0043170	macromolecule metabolic process	652	9.43E-31
GO.0044699	single-organism process	952	1.48E-29
GO.0044267	cellular protein metabolic process	374	3.25E-29
GO.0050794	regulation of cellular process	796	3.64E-29
GO.0019538	protein metabolic process	419	7.70E-28
GO.0043412	macromolecule modification	324	1.14E-26
GO.0006464	cellular protein modification process	312	1.22E-26
GO.0051641	cellular localization	243	1.17E-22
GO.0008104	protein localization	212	1.55E-20
GO.0071840	cellular component organization or biogenesis	451	4.07E-19
GO.0051179	localization	430	2.62E-18
GO.0016043	cellular component organization	435	3.01E-18
GO.0033036	macromolecule localization	227	3.86E-17
GO.0019222	regulation of metabolic process	556	1.28E-16
GO.0048519	negative regulation of biological process	424	5.98E-16
GO.0051234	establishment of localization	349	1.33E-15
GO.0048523	negative regulation of cellular process	397	1.80E-15
GO.0006810	transport	337	3.13E-15
GO.0034613	cellular protein localization	143	5.02E-15
GO.0051649	establishment of localization in cell	184	6.76E-15
GO.0048518	positive regulation of biological process	483	9.30E-15
GO.0070727	cellular macromolecule localization	143	9.30E-15
GO.0051716	cellular response to stimulus	460	2.82E-14
GO.0031323	regulation of cellular metabolic process	487	1.18E-13
GO.0006996	organelle organization	285	1.57E-13
GO.0045184	establishment of protein localization	153	1.57E-13
GO.0015031	protein transport	144	2.21E-13
GO.0050896	response to stimulus	537	2.34E-13
GO.0070647	protein modification by small protein conjugation or removal	108	2.40E-13
GO.0048522	positive regulation of cellular process	422	1.59E-12
GO.0016192	vesicle-mediated transport	134	1.62E-12
GO.0010646	regulation of cell communication	281	1.74E-12
GO.0065009	regulation of molecular function	267	2.08E-12
GO.0035556	intracellular signal transduction	167	4.98E-12
GO.0060255	regulation of macromolecule metabolic process	465	4.98E-12
GO.0023051	regulation of signaling	267	7.04E-12
GO.0046907	intracellular transport	140	1.30E-11
GO.0080090	regulation of primary metabolic process	463	1.62E-11
GO.0048583	regulation of response to stimulus	304	2.44E-11
GO.0016567	protein ubiquitination	87	2.85E-11
GO.0032446	protein modification by small protein conjugation	91	4.56E-11
GO.0006796	phosphate-containing compound metabolic process	195	8.49E-11
GO.0009058	biosynthetic process	376	1.16E-10
GO.0006793	phosphorus metabolic process	198	1.29E-10
GO.0006807	nitrogen compound metabolic process	427	1.44E-10
GO.1902578	single-organism localization	277	2.29E-10
GO.0044249	cellular biosynthetic process	361	2.70E-10
GO.0051128	regulation of cellular component organization	232	2.70E-10
GO.0007154	cell communication	370	3.24E-10
GO.1901576	organic substance biosynthetic process	365	6.47E-10
GO.0009966	regulation of signal transduction	233	6.95E-10
GO.0010648	negative regulation of cell communication	137	8.38E-10
GO.0023057	negative regulation of signaling	136	9.92E-10
GO.0033554	cellular response to stress	165	1.02E-09
GO.0044700	single organism signaling	356	1.32E-09
GO.0023052	signaling	356	1.47E-09
GO.1903649	regulation of cytoplasmic transport	69	2.10E-09
GO.0009893	positive regulation of metabolic process	327	3.23E-09
GO.0009968	negative regulation of signal transduction	123	3.32E-09
GO.0032879	regulation of localization	230	5.18E-09
GO.0034641	cellular nitrogen compound metabolic process	396	6.11E-09
GO.0032502	developmental process	447	6.53E-09
GO.1903650	negative regulation of cytoplasmic transport	28	6.99E-09
GO.0044085	cellular component biogenesis	196	7.09E-09
GO.0044767	single-organism developmental process	444	1.10E-08
GO.1902582	single-organism intracellular transport	114	1.13E-08
GO.0032386	regulation of intracellular transport	79	1.24E-08
GO.0044710	single-organism metabolic process	337	2.25E-08
GO.0048856	anatomical structure development	403	2.84E-08
GO.0051171	regulation of nitrogen compound metabolic process	338	4.04E-08
GO.0032880	regulation of protein localization	111	4.39E-08
GO.0033043	regulation of organelle organization	130	4.58E-08
GO.0051246	regulation of protein metabolic process	242	4.99E-08
GO.0090304	nucleic acid metabolic process	315	5.59E-08
GO.0031399	regulation of protein modification process	168	5.63E-08
GO.0010256	endomembrane system organization	62	5.93E-08
GO.0006139	nucleobase-containing compound metabolic process	347	6.68E-08
GO.0044765	single-organism transport	248	8.06E-08
GO.0032268	regulation of cellular protein metabolic process	226	9.26E-08
GO.0007165	signal transduction	328	9.28E-08
GO.0007399	nervous system development	202	9.55E-08
GO.0048699	generation of neurons	147	1.01E-07
GO.0022607	cellular component assembly	174	2.04E-07
GO.0043933	macromolecular complex subunit organization	185	2.04E-07
GO.0046483	heterocycle metabolic process	355	2.30E-07
GO.0071702	organic substance transport	172	2.30E-07
GO.0051049	regulation of transport	175	2.42E-07
GO.1901360	organic cyclic compound metabolic process	372	2.58E-07
GO.0048585	negative regulation of response to stimulus	140	2.90E-07
GO.0031325	positive regulation of cellular metabolic process	269	3.23E-07
GO.0006725	cellular aromatic compound metabolic process	355	3.79E-07
GO.0044707	single-multicellular organism process	460	3.93E-07
GO.0009057	macromolecule catabolic process	89	3.96E-07
GO.1902589	single-organism organelle organization	195	4.46E-07
GO.2000112	regulation of cellular macromolecule biosynthetic process	306	4.46E-07
GO.0006470	protein dephosphorylation	36	5.20E-07
GO.0010468	regulation of gene expression	329	6.57E-07
GO.0031326	regulation of cellular biosynthetic process	326	6.83E-07
GO.0032501	multicellular organismal process	471	6.83E-07
GO.0019219	regulation of nucleobase-containing compound metabolic process	311	6.94E-07
GO.0030163	protein catabolic process	70	7.49E-07
GO.0006886	intracellular protein transport	77	7.56E-07
GO.0044265	cellular macromolecule catabolic process	81	7.56E-07
GO.0034645	cellular macromolecule biosynthetic process	283	7.63E-07
GO.0010467	gene expression	302	8.61E-07
GO.1902531	regulation of intracellular signal transduction	142	8.63E-07
GO.0009059	macromolecule biosynthetic process	284	9.57E-07
GO.0022008	neurogenesis	151	9.57E-07
GO.0048869	cellular developmental process	321	1.02E-06
GO.0030154	cell differentiation	306	1.03E-06
GO.0051252	regulation of RNA metabolic process	288	1.03E-06
GO.0009894	regulation of catabolic process	91	1.09E-06
GO.0032387	negative regulation of intracellular transport	28	1.09E-06
GO.0080135	regulation of cellular response to stress	86	1.28E-06
GO.0007275	multicellular organismal development	384	1.35E-06
GO.0048731	system development	341	1.35E-06
GO.0044093	positive regulation of molecular function	159	1.39E-06
GO.1903827	regulation of cellular protein localization	68	1.80E-06
GO.0050790	regulation of catalytic activity	199	2.18E-06
GO.0010556	regulation of macromolecule biosynthetic process	309	2.19E-06
GO.0061024	membrane organization	80	2.35E-06
GO.0090317	negative regulation of intracellular protein transport	23	2.37E-06
GO.0006355	regulation of transcription, DNA-templated	277	2.42E-06
GO.0009889	regulation of biosynthetic process	326	2.50E-06
GO.0008219	cell death	112	2.55E-06
GO.0016265	death	112	2.55E-06
GO.1903506	regulation of nucleic acid-templated transcription	277	2.72E-06
GO.0009056	catabolic process	150	3.00E-06
GO.0009892	negative regulation of metabolic process	232	3.38E-06
GO.2001141	regulation of RNA biosynthetic process	277	3.43E-06
GO.0044257	cellular protein catabolic process	64	3.55E-06
GO.0010604	positive regulation of macromolecule metabolic process	249	4.39E-06
GO.0046823	negative regulation of nucleocytoplasmic transport	19	4.39E-06
GO.0006950	response to stress	257	4.49E-06
GO.0012501	programmed cell death	108	4.87E-06
GO.0051603	proteolysis involved in cellular protein catabolic process	62	5.83E-06
GO.1903828	negative regulation of cellular protein localization	27	7.15E-06
GO.0050767	regulation of neurogenesis	81	7.36E-06
GO.0007049	cell cycle	123	7.85E-06
GO.0060341	regulation of cellular localization	125	8.21E-06
GO.0044802	single-organism membrane organization	71	8.53E-06
GO.0010941	regulation of cell death	148	8.71E-06
GO.0016311	dephosphorylation	42	8.73E-06
GO.0051223	regulation of protein transport	86	8.90E-06
GO.0042308	negative regulation of protein import into nucleus	17	1.10E-05
GO.1902580	single-organism cellular localization	84	1.16E-05
GO.0070201	regulation of establishment of protein localization	90	1.23E-05
GO.0033157	regulation of intracellular protein transport	53	1.32E-05
GO.0031329	regulation of cellular catabolic process	77	1.39E-05
GO.0060548	negative regulation of cell death	101	1.42E-05
GO.0031324	negative regulation of cellular metabolic process	210	1.47E-05
GO.0019220	regulation of phosphate metabolic process	155	1.48E-05
GO.0000209	protein polyubiquitination	30	1.61E-05
GO.0051174	regulation of phosphorus metabolic process	155	1.84E-05
GO.1901575	organic substance catabolic process	129	1.84E-05
GO.0042992	negative regulation of transcription factor import into nucleus	13	1.86E-05
GO.0051338	regulation of transferase activity	90	2.01E-05
GO.0042325	regulation of phosphorylation	134	2.30E-05
GO.0045664	regulation of neuron differentiation	67	2.55E-05
GO.0010605	negative regulation of macromolecule metabolic process	208	2.57E-05
GO.0016310	phosphorylation	115	2.57E-05
GO.0016070	RNA metabolic process	265	2.80E-05
GO.0051726	regulation of cell cycle	99	3.09E-05
GO.0007264	small GTPase mediated signal transduction	49	3.13E-05
GO.0051960	regulation of nervous system development	88	3.13E-05
GO.0060284	regulation of cell development	94	3.47E-05
GO.0030030	cell projection organization	101	3.69E-05
GO.0046822	regulation of nucleocytoplasmic transport	35	3.87E-05
GO.1903533	regulation of protein targeting	44	3.90E-05
GO.0006915	apoptotic process	102	4.35E-05
GO.0032434	regulation of proteasomal ubiquitin-dependent protein catabolic process	26	4.70E-05
GO.0042981	regulation of apoptotic process	136	5.04E-05
GO.0043066	negative regulation of apoptotic process	92	5.05E-05
GO.0019941	modification-dependent protein catabolic process	54	5.11E-05
GO.0033365	protein localization to organelle	55	5.11E-05
GO.0045595	regulation of cell differentiation	155	5.11E-05
GO.1902532	negative regulation of intracellular signal transduction	55	5.11E-05
GO.0010498	proteasomal protein catabolic process	41	5.18E-05
GO.0006511	ubiquitin-dependent protein catabolic process	53	5.39E-05
GO.0044271	cellular nitrogen compound biosynthetic process	261	5.39E-05
GO.1900181	negative regulation of protein localization to nucleus	17	5.67E-05
GO.0043067	regulation of programmed cell death	137	5.68E-05
GO.0006508	proteolysis	109	5.70E-05
GO.0001932	regulation of protein phosphorylation	124	5.76E-05
GO.0043069	negative regulation of programmed cell death	93	5.79E-05
GO.0044248	cellular catabolic process	124	6.31E-05
GO.1903320	regulation of protein modification by small protein conjugation or removal	35	6.86E-05
GO.0051493	regulation of cytoskeleton organization	54	7.56E-05
GO.0051224	negative regulation of protein transport	35	7.74E-05
GO.0051172	negative regulation of nitrogen compound metabolic process	145	8.00E-05
GO.0051129	negative regulation of cellular component organization	68	8.08E-05
GO.0043632	modification-dependent macromolecule catabolic process	54	8.11E-05
GO.0042347	negative regulation of NF-kappaB import into nucleus	8	8.64E-05
GO.0042994	cytoplasmic sequestering of transcription factor	8	8.64E-05
GO.0044087	regulation of cellular component biogenesis	79	8.84E-05
GO.0050793	regulation of developmental process	206	9.10E-05
GO.0051173	positive regulation of nitrogen compound metabolic process	174	9.15E-05
GO.0071822	protein complex subunit organization	119	9.58E-05
GO.0031327	negative regulation of cellular biosynthetic process	141	0.00011
GO.0000075	cell cycle checkpoint	28	0.000117
GO.0031396	regulation of protein ubiquitination	32	0.00012
GO.0065008	regulation of biological quality	244	0.000122
GO.0051130	positive regulation of cellular component organization	121	0.000129
GO.0043549	regulation of kinase activity	81	0.00014
GO.0016482	cytoplasmic transport	66	0.000146
GO.0043523	regulation of neuron apoptotic process	34	0.000154
GO.0045935	positive regulation of nucleobase-containing compound metabolic process	166	0.000154
GO.0045930	negative regulation of mitotic cell cycle	29	0.000162
GO.0010638	positive regulation of organelle organization	73	0.00017
GO.0051254	positive regulation of RNA metabolic process	151	0.00017
GO.0061136	regulation of proteasomal protein catabolic process	33	0.000196
GO.0051051	negative regulation of transport	58	0.0002
GO.0022604	regulation of cell morphogenesis	60	0.000224
GO.0006887	exocytosis	35	0.000237
GO.0051220	cytoplasmic sequestering of protein	10	0.000237
GO.2001234	negative regulation of apoptotic signaling pathway	35	0.000237
GO.0030032	lamellipodium assembly	12	0.000242
GO.0009890	negative regulation of biosynthetic process	141	0.000245
GO.0043161	proteasome-mediated ubiquitin-dependent protein catabolic process	38	0.000262
GO.0006457	protein folding	29	0.00027
GO.0072659	protein localization to plasma membrane	26	0.000272
GO.0097581	lamellipodium organization	13	0.000289
GO.1903050	regulation of proteolysis involved in cellular protein catabolic process	35	0.000291
GO.2001233	regulation of apoptotic signaling pathway	53	0.000306
GO.1990778	protein localization to cell periphery	26	0.000311
GO.0034654	nucleobase-containing compound biosynthetic process	220	0.000324
GO.0007010	cytoskeleton organization	91	0.00033
GO.0042176	regulation of protein catabolic process	49	0.000336
GO.0065003	macromolecular complex assembly	109	0.000339
GO.0031344	regulation of cell projection organization	60	0.000354
GO.0010639	negative regulation of organelle organization	40	0.000378
GO.0080134	regulation of response to stress	116	0.000395
GO.0042306	regulation of protein import into nucleus	28	0.000434
GO.1904589	regulation of protein import	28	0.000495
GO.0051050	positive regulation of transport	92	0.000521
GO.2000026	regulation of multicellular organismal development	157	0.000539
GO.1901214	regulation of neuron death	37	0.000544
GO.0006650	glycerophospholipid metabolic process	30	0.000554
GO.0045893	positive regulation of transcription, DNA-templated	144	0.000554
GO.0048193	Golgi vesicle transport	29	0.000554
GO.0010558	negative regulation of macromolecule biosynthetic process	133	0.000564
GO.0045666	positive regulation of neuron differentiation	42	0.000564
GO.0006357	regulation of transcription from RNA polymerase II promoter	164	0.000584
GO.0006644	phospholipid metabolic process	37	0.000585
GO.0018193	peptidyl-amino acid modification	76	0.000596
GO.0007029	endoplasmic reticulum organization	12	0.000603
GO.1900180	regulation of protein localization to nucleus	30	0.000606
GO.1902680	positive regulation of RNA biosynthetic process	144	0.000606
GO.0032940	secretion by cell	49	0.000609
GO.0019438	aromatic compound biosynthetic process	224	0.000648
GO.1903362	regulation of cellular protein catabolic process	36	0.00067
GO.0043085	positive regulation of catalytic activity	123	0.000672
GO.0010769	regulation of cell morphogenesis involved in differentiation	41	0.000705
GO.0018130	heterocycle biosynthetic process	223	0.000705
GO.0006396	RNA processing	76	0.000729
GO.0032409	regulation of transporter activity	29	0.000762
GO.1901362	organic cyclic compound biosynthetic process	232	0.000775
GO.0045859	regulation of protein kinase activity	73	0.000796
GO.0045934	negative regulation of nucleobase-containing compound metabolic process	131	0.000812
GO.0031400	negative regulation of protein modification process	63	0.000813
GO.0032270	positive regulation of cellular protein metabolic process	121	0.000813
GO.0006897	endocytosis	52	0.000822
GO.0051247	positive regulation of protein metabolic process	129	0.000845
GO.0001933	negative regulation of protein phosphorylation	47	0.000887
GO.0006461	protein complex assembly	90	0.000887
GO.0070271	protein complex biogenesis	90	0.000887
GO.0051495	positive regulation of cytoskeleton organization	27	0.000956
GO.0010629	negative regulation of gene expression	139	0.00104
GO.0030182	neuron differentiation	93	0.00104
GO.0045839	negative regulation of mitotic nuclear division	10	0.00104
GO.0031175	neuron projection development	62	0.00107
GO.0009653	anatomical structure morphogenesis	198	0.00117
GO.0031401	positive regulation of protein modification process	99	0.00119
GO.0051253	negative regulation of RNA metabolic process	121	0.00119
GO.0071310	cellular response to organic substance	135	0.0012
GO.0009719	response to endogenous stimulus	120	0.00122
GO.0050769	positive regulation of neurogenesis	48	0.00125
GO.1900006	positive regulation of dendrite development	14	0.00125
GO.0009896	positive regulation of catabolic process	50	0.00129
GO.0046486	glycerolipid metabolic process	35	0.00132
GO.0051784	negative regulation of nuclear division	12	0.00133
GO.0010975	regulation of neuron projection development	46	0.00139
GO.0051248	negative regulation of protein metabolic process	100	0.00144
GO.0048666	neuron development	76	0.00148
GO.0043524	negative regulation of neuron apoptotic process	25	0.00151
GO.0006974	cellular response to DNA damage stimulus	69	0.00163
GO.0043269	regulation of ion transport	66	0.00169
GO.2000113	negative regulation of cellular macromolecule biosynthetic process	125	0.00174
GO.1904029	regulation of cyclin-dependent protein kinase activity	22	0.00183
GO.0045944	positive regulation of transcription from RNA polymerase II promoter	108	0.00186
GO.0032388	positive regulation of intracellular transport	42	0.00197
GO.0006469	negative regulation of protein kinase activity	31	0.00199
GO.0006605	protein targeting	37	0.00214
GO.0010033	response to organic substance	186	0.00218
GO.0032259	methylation	36	0.0023
GO.0031328	positive regulation of cellular biosynthetic process	164	0.00236
GO.1902679	negative regulation of RNA biosynthetic process	116	0.00236
GO.1901135	carbohydrate derivative metabolic process	84	0.00238
GO.0007183	SMAD protein complex assembly	5	0.0024
GO.0030036	actin cytoskeleton organization	47	0.0024
GO.0007009	plasma membrane organization	30	0.00253
GO.0031331	positive regulation of cellular catabolic process	44	0.00255
GO.0032269	negative regulation of cellular protein metabolic process	93	0.00271
GO.0006351	transcription, DNA-templated	192	0.00275
GO.0097659	nucleic acid-templated transcription	192	0.00275
GO.0010628	positive regulation of gene expression	160	0.00281
GO.0032774	RNA biosynthetic process	193	0.00288
GO.0043122	regulation of I-kappaB kinase/NF-kappaB signaling	32	0.00297
GO.0070887	cellular response to chemical stimulus	160	0.00297
GO.0006468	protein phosphorylation	86	0.00299
GO.0010557	positive regulation of macromolecule biosynthetic process	153	0.00299
GO.0051648	vesicle localization	26	0.00326
GO.0050773	regulation of dendrite development	20	0.00373
GO.0051348	negative regulation of transferase activity	35	0.00373
GO.0072657	protein localization to membrane	37	0.00373
GO.0048584	positive regulation of response to stimulus	157	0.00382
GO.0042990	regulation of transcription factor import into nucleus	17	0.00403
GO.0006629	lipid metabolic process	95	0.00426
GO.0072665	protein localization to vacuole	9	0.00426
GO.0000904	cell morphogenesis involved in differentiation	58	0.00449
GO.0042326	negative regulation of phosphorylation	48	0.00449
GO.0060322	head development	78	0.0046
GO.0000902	cell morphogenesis	86	0.00465
GO.0006623	protein targeting to vacuole	8	0.00469
GO.0032989	cellular component morphogenesis	94	0.00469
GO.0034622	cellular macromolecular complex assembly	59	0.00474
GO.0010647	positive regulation of cell communication	139	0.00509
GO.0044711	single-organism biosynthetic process	99	0.00511
GO.0044092	negative regulation of molecular function	97	0.00513
GO.0009891	positive regulation of biosynthetic process	164	0.00522
GO.0045936	negative regulation of phosphate metabolic process	58	0.00522
GO.0009263	deoxyribonucleotide biosynthetic process	5	0.00542
GO.0007420	brain development	74	0.00544
GO.0048468	cell development	147	0.00548
GO.0043254	regulation of protein complex assembly	40	0.00552
GO.0031532	actin cytoskeleton reorganization	13	0.00574
GO.0016071	mRNA metabolic process	52	0.00576
GO.0032507	maintenance of protein location in cell	14	0.00588
GO.0071495	cellular response to endogenous stimulus	83	0.0059
GO.1901215	negative regulation of neuron death	26	0.0059
GO.0010959	regulation of metal ion transport	39	0.00599
GO.1903507	negative regulation of nucleic acid-templated transcription	112	0.00624
GO.0072666	establishment of protein localization to vacuole	8	0.0065
GO.0008654	phospholipid biosynthetic process	23	0.00661
GO.0007034	vacuolar transport	15	0.0068
GO.0007253	cytoplasmic sequestering of NF-kappaB	4	0.0068
GO.0006888	ER to Golgi vesicle-mediated transport	13	0.00683
GO.0007254	JNK cascade	13	0.00683
GO.0051403	stress-activated MAPK cascade	14	0.0069
GO.0051650	establishment of vesicle localization	24	0.00705
GO.0007093	mitotic cell cycle checkpoint	18	0.00734
GO.0031570	DNA integrity checkpoint	18	0.00734
GO.0051347	positive regulation of transferase activity	53	0.00765
GO.0046903	secretion	54	0.00769
GO.0051239	regulation of multicellular organismal process	210	0.00791
GO.0007265	Ras protein signal transduction	27	0.00811
GO.0090407	organophosphate biosynthetic process	44	0.00825
GO.0045786	negative regulation of cell cycle	42	0.00826
GO.0051962	positive regulation of nervous system development	51	0.00833
GO.0034976	response to endoplasmic reticulum stress	26	0.00856
GO.0033673	negative regulation of kinase activity	31	0.0086
GO.0030029	actin filament-based process	47	0.00879
GO.0022898	regulation of transmembrane transporter activity	25	0.009
GO.1901564	organonitrogen compound metabolic process	124	0.009
GO.0043623	cellular protein complex assembly	35	0.00903
GO.0007030	Golgi organization	15	0.00907
GO.0050673	epithelial cell proliferation	17	0.00907
GO.0050805	negative regulation of synaptic transmission	12	0.00939
GO.0010771	negative regulation of cell morphogenesis involved in differentiation	16	0.00987
GO.1901137	carbohydrate derivative biosynthetic process	55	0.00998
GO.0006999	nuclear pore organization	5	0.0102
GO.0007017	microtubule-based process	57	0.0104
GO.0008283	cell proliferation	60	0.0104
GO.0018209	peptidyl-serine modification	21	0.0104
GO.0032970	regulation of actin filament-based process	38	0.0104
GO.0010948	negative regulation of cell cycle process	25	0.0108
GO.1904062	regulation of cation transmembrane transport	23	0.0108
GO.0045892	negative regulation of transcription, DNA-templated	109	0.011
GO.0001952	regulation of cell-matrix adhesion	16	0.0112
GO.0042221	response to chemical	236	0.0113
GO.0060828	regulation of canonical Wnt signaling pathway	25	0.0118
GO.0010720	positive regulation of cell development	53	0.0122
GO.0034762	regulation of transmembrane transport	45	0.0127
GO.0002028	regulation of sodium ion transport	14	0.0129
GO.0032482	Rab protein signal transduction	14	0.0129
GO.0061077	chaperone-mediated protein folding	11	0.0129
GO.2001242	regulation of intrinsic apoptotic signaling pathway	23	0.0131
GO.0007033	vacuole organization	18	0.0134
GO.0010564	regulation of cell cycle process	52	0.0134
GO.0032412	regulation of ion transmembrane transporter activity	24	0.0136
GO.0009101	glycoprotein biosynthetic process	34	0.0139
GO.0032535	regulation of cellular component size	36	0.0143
GO.0032886	regulation of microtubule-based process	23	0.0144
GO.0042327	positive regulation of phosphorylation	81	0.0144
GO.0045185	maintenance of protein location	14	0.0149
GO.0046474	glycerophospholipid biosynthetic process	18	0.0151
GO.0044255	cellular lipid metabolic process	72	0.0152
GO.0010765	positive regulation of sodium ion transport	9	0.0154
GO.0006397	mRNA processing	44	0.0155
GO.0043124	negative regulation of I-kappaB kinase/NF-kappaB signaling	11	0.0155
GO.0051640	organelle localization	41	0.0155
GO.0019042	viral latency	3	0.0158
GO.0022603	regulation of anatomical structure morphogenesis	88	0.0158
GO.0060916	mesenchymal cell proliferation involved in lung development	3	0.0158
GO.2000017	positive regulation of determination of dorsal identity	3	0.0158
GO.0070507	regulation of microtubule cytoskeleton organization	20	0.016
GO.0003149	membranous septum morphogenesis	4	0.0163
GO.0043244	regulation of protein complex disassembly	16	0.0163
GO.0071763	nuclear membrane organization	4	0.0163
GO.1903322	positive regulation of protein modification by small protein conjugation or removal	19	0.0163
GO.0009100	glycoprotein metabolic process	37	0.0165
GO.0051932	synaptic transmission, GABAergic	5	0.0173
GO.0000077	DNA damage checkpoint	16	0.0183
GO.0007417	central nervous system development	86	0.0183
GO.0016197	endosomal transport	27	0.0183
GO.0016579	protein deubiquitination	16	0.0183
GO.0043270	positive regulation of ion transport	29	0.0183
GO.0051705	multi-organism behavior	16	0.0183
GO.0051782	negative regulation of cell division	12	0.0183
GO.0008610	lipid biosynthetic process	47	0.0184
GO.0070646	protein modification by small protein removal	18	0.0184
GO.0007032	endosome organization	9	0.0188
GO.0019637	organophosphate metabolic process	70	0.0188
GO.0023056	positive regulation of signaling	125	0.0192
GO.0009200	deoxyribonucleoside triphosphate metabolic process	6	0.0196
GO.0048070	regulation of developmental pigmentation	6	0.0196
GO.1903651	positive regulation of cytoplasmic transport	32	0.0199
GO.0090174	organelle membrane fusion	13	0.0205
GO.0006479	protein methylation	17	0.0206
GO.0031398	positive regulation of protein ubiquitination	17	0.0206
GO.0032956	regulation of actin cytoskeleton organization	33	0.0206
GO.0042752	regulation of circadian rhythm	17	0.0206
GO.0016055	Wnt signaling pathway	33	0.0221
GO.0022402	cell cycle process	82	0.0221
GO.0045017	glycerolipid biosynthetic process	19	0.0221
GO.0006665	sphingolipid metabolic process	17	0.0232
GO.1903573	negative regulation of response to endoplasmic reticulum stress	9	0.0233
GO.0009262	deoxyribonucleotide metabolic process	7	0.0241
GO.0031365	N-terminal protein amino acid modification	7	0.0241
GO.0045737	positive regulation of cyclin-dependent protein serine/threonine kinase activity	7	0.0241
GO.0000165	MAPK cascade	24	0.0242
GO.0007162	negative regulation of cell adhesion	28	0.0263
GO.0051093	negative regulation of developmental process	85	0.0263
GO.0042594	response to starvation	27	0.0265
GO.0006259	DNA metabolic process	64	0.0266
GO.0006417	regulation of translation	35	0.0269
GO.0032271	regulation of protein polymerization	21	0.0269
GO.0034765	regulation of ion transmembrane transport	42	0.0269
GO.0061025	membrane fusion	19	0.0269
GO.0006809	nitric oxide biosynthetic process	5	0.0272
GO.0033674	positive regulation of kinase activity	47	0.0274
GO.0006995	cellular response to nitrogen starvation	6	0.0276
GO.0043562	cellular response to nitrogen levels	6	0.0276
GO.0051090	regulation of sequence-specific DNA binding transcription factor activity	40	0.0277
GO.0000122	negative regulation of transcription from RNA polymerase II promoter	77	0.028
GO.0008064	regulation of actin polymerization or depolymerization	20	0.028
GO.0009267	cellular response to starvation	23	0.028
GO.0016241	regulation of macroautophagy	27	0.028
GO.0030832	regulation of actin filament length	20	0.028
GO.0051651	maintenance of location in cell	14	0.028
GO.1901879	regulation of protein depolymerization	14	0.028
GO.0031098	stress-activated protein kinase signaling cascade	17	0.0282
GO.0035493	SNARE complex assembly	4	0.0312
GO.0044387	negative regulation of protein kinase activity by regulation of protein phosphorylation	4	0.0312
GO.0048041	focal adhesion assembly	7	0.0312
GO.0048671	negative regulation of collateral sprouting	4	0.0312
GO.1904030	negative regulation of cyclin-dependent protein kinase activity	14	0.0318
GO.0006906	vesicle fusion	12	0.033
GO.0045596	negative regulation of cell differentiation	67	0.0339
GO.0007005	mitochondrion organization	39	0.034
GO.0046834	lipid phosphorylation	9	0.0343
GO.0050771	negative regulation of axonogenesis	9	0.0343
GO.0048812	neuron projection morphogenesis	42	0.0346
GO.0008277	regulation of G-protein coupled receptor protein signaling pathway	17	0.0349
GO.0043666	regulation of phosphoprotein phosphatase activity	10	0.0352
GO.0007166	cell surface receptor signaling pathway	134	0.0359
GO.0001701	in utero embryonic development	48	0.0378
GO.0090150	establishment of protein localization to membrane	21	0.0378
GO.2001057	reactive nitrogen species metabolic process	6	0.0378
GO.0031669	cellular response to nutrient levels	26	0.0379
GO.0050775	positive regulation of dendrite morphogenesis	8	0.038
GO.0060412	ventricular septum morphogenesis	8	0.038
GO.0043414	macromolecule methylation	24	0.0383
GO.1903146	regulation of mitophagy	23	0.0383
GO.0048489	synaptic vesicle transport	17	0.0384
GO.0023014	signal transduction by protein phosphorylation	28	0.0389
GO.0010522	regulation of calcium ion transport into cytosol	13	0.0394
GO.0090002	establishment of protein localization to plasma membrane	13	0.0394
GO.1902115	regulation of organelle assembly	16	0.0394
GO.0033044	regulation of chromosome organization	27	0.0395
GO.1904031	positive regulation of cyclin-dependent protein kinase activity	7	0.0395
GO.0015693	magnesium ion transport	5	0.0397
GO.0070848	response to growth factor	43	0.0397
GO.2001243	negative regulation of intrinsic apoptotic signaling pathway	15	0.0398
GO.0070085	glycosylation	29	0.0402
GO.0040007	growth	48	0.0406
GO.1903008	organelle disassembly	10	0.0408
GO.0006928	movement of cell or subcellular component	101	0.0425
GO.0061061	muscle structure development	49	0.0444
GO.0043255	regulation of carbohydrate biosynthetic process	15	0.0446
GO.0048814	regulation of dendrite morphogenesis	13	0.0446
GO.0010821	regulation of mitochondrion organization	37	0.0453
GO.0001934	positive regulation of protein phosphorylation	75	0.0457
GO.0018022	peptidyl-lysine methylation	11	0.0458
GO.0050770	regulation of axonogenesis	19	0.0458
GO.0060411	cardiac septum morphogenesis	11	0.0458
GO.0000422	mitophagy	8	0.0459
GO.0097479	synaptic vesicle localization	17	0.0461
GO.0003383	apical constriction	3	0.0466
GO.0006486	protein glycosylation	28	0.0466
GO.0006499	N-terminal protein myristoylation	3	0.0466
GO.0006914	autophagy	21	0.0466
GO.0007258	JUN phosphorylation	3	0.0466
GO.0015931	nucleobase-containing compound transport	21	0.0466
GO.0021543	pallium development	23	0.0466
GO.0043413	macromolecule glycosylation	28	0.0466
GO.0051581	negative regulation of neurotransmitter uptake	3	0.0466
GO.0051612	negative regulation of serotonin uptake	3	0.0466
GO.0098602	single organism cell adhesion	50	0.0466
GO.0007041	lysosomal transport	10	0.0468
GO.0030900	forebrain development	43	0.0468
GO.0043484	regulation of RNA splicing	16	0.0468
GO.1901799	negative regulation of proteasomal protein catabolic process	10	0.0468
GO.0042345	regulation of NF-kappaB import into nucleus	9	0.0469
GO.0048589	developmental growth	41	0.0469
GO.0031346	positive regulation of cell projection organization	34	0.047
GO.0042147	retrograde transport, endosome to Golgi	12	0.0471
GO.0051301	cell division	51	0.0475
GO.1901385	regulation of voltage-gated calcium channel activity	6	0.0476
GO.0006997	nucleus organization	15	0.0477
GO.0016236	macroautophagy	13	0.0481
GO.0022406	membrane docking	13	0.0481
GO.0032101	regulation of response to external stimulus	74	0.0481
GO.0048284	organelle fusion	14	0.0482
