# Supplementary material for: Progression of pathology in PINK1-deficient mouse brain from splicing via ubiquitination, ER stress, and mitophagy changes to neuroinflammation
Source: J Neuroinflammation. 2017 Aug 2;14:154. doi: 10.1186/s12974-017-0928-0 (PMC5541666; doi:10.1186/s12974-017-0928-0)
Supplement: Supplementary file 3 — STRING bioinformatics assessment of all significant changes, including subtle effects. Ranked list of the significant transcript expression changes in PINK1-deficient mouse cerebellar tissue at ages 6 weeks, 6 months, and 18 months, which were used as input for the STRING analysis (A). Significant functional enrichments in the protein-protein-interaction network according to the STRING database is shown regarding GO Cellular component at 6 weeks with all factors of AdjPvalue <0.05 (B), 6 months with all factors of AdjPvalue <0.05 (C), and 18 months with all factors of AdjPvalue <0.01, with the term “intracellular membrane-bounded organelle” being prominent at all 3 ages (D). Prominent enrichments were highlighted in yellow color. In GO Molecular Process at 18 months with all factors of AdjPvalue <0.01 the relevance of stimulus- and stress-dependent pathways is apparent, e.g., endoplasmic reticulum stress, and a significant enrichment of mitophagy factors appears here in lines 495 and 518 (E). Among KEGG pathways at 18 months with all factors of AdjPvalue <0.01, the highest ranked pathways include “MAPK signaling”, “Ubiquitin-mediated proteolysis”, “Protein processing in endoplasmic reticulum” and “Bacterial invasion of epithelial cells” (F). Orange color was used to highlight some MAPK-dependent synaptic signaling pathways with significant enrichment, purple color was used for ubiquitination and protein processing pathways, green color was used for neuroinflammation pathways. (ZIP 366 kb) [file 12974_2017_928_MOESM3_ESM.zip › TorresAuburger-SupplTableS2F.xls]

## Sheet: Pink1KOcbll18mo-KEGGpathways
#pathway ID	pathway description	observed gene count	false discovery rate
4010	MAPK signaling pathway	47	2.64e-06
4120	Ubiquitin mediated proteolysis	32	2.64e-06
4141	Protein processing in endoplasmic reticulum	34	1.68e-05
5100	Bacterial invasion of epithelial cells	20	6.37e-05
5200	Pathways in cancer	50	0.000126
4144	Endocytosis	35	0.00049
4390	Hippo signaling pathway	28	0.00049
4611	Platelet activation	25	0.00049
4722	Neurotrophin signaling pathway	24	0.00049
5145	Toxoplasmosis	23	0.00049
5205	Proteoglycans in cancer	36	0.00049
5210	Colorectal cancer	16	0.00049
5220	Chronic myeloid leukemia	17	0.00049
4070	Phosphatidylinositol signaling system	18	0.000519
5212	Pancreatic cancer	16	0.000519
5142	Chagas disease (American trypanosomiasis)	21	0.000683
4015	Rap1 signaling pathway	34	0.000687
4062	Chemokine signaling pathway	30	0.000751
4917	Prolactin signaling pathway	17	0.000751
5166	HTLV-I infection	40	0.000751
4810	Regulation of actin cytoskeleton	34	0.000823
4914	Progesterone-mediated oocyte maturation	18	0.00118
4261	Adrenergic signaling in cardiomyocytes	25	0.00126
4919	Thyroid hormone signaling pathway	22	0.00144
4130	SNARE interactions in vesicular transport	10	0.00168
4730	Long-term depression	14	0.00168
4370	VEGF signaling pathway	14	0.00194
4022	cGMP-PKG signaling pathway	27	0.00239
4310	Wnt signaling pathway	24	0.00239
4012	ErbB signaling pathway	17	0.0024
4014	Ras signaling pathway	33	0.00249
4068	FoxO signaling pathway	23	0.00249
4530	Tight junction	23	0.00266
4723	Retrograde endocannabinoid signaling	19	0.00282
4915	Estrogen signaling pathway	18	0.00282
4360	Axon guidance	22	0.0032
4728	Dopaminergic synapse	21	0.0051
562	Inositol phosphate metabolism	13	0.00544
4620	Toll-like receptor signaling pathway	18	0.00544
4668	TNF signaling pathway	19	0.00544
4721	Synaptic vesicle cycle	13	0.00544
4664	Fc epsilon RI signaling pathway	14	0.00569
4725	Cholinergic synapse	19	0.00607
4916	Melanogenesis	17	0.00795
5211	Renal cell carcinoma	13	0.00795
4727	GABAergic synapse	16	0.00799
4710	Circadian rhythm	8	0.00842
3420	Nucleotide excision repair	10	0.00858
4210	Apoptosis	15	0.00858
4510	Focal adhesion	29	0.00858
4520	Adherens junction	14	0.00858
5213	Endometrial cancer	11	0.00961
4622	RIG-I-like receptor signaling pathway	13	0.012
4713	Circadian entrainment	16	0.0124
5222	Small cell lung cancer	15	0.0127
4270	Vascular smooth muscle contraction	19	0.0133
4142	Lysosome	19	0.015
4380	Osteoclast differentiation	19	0.015
4660	T cell receptor signaling pathway	17	0.015
4724	Glutamatergic synapse	18	0.015
5215	Prostate cancer	15	0.0162
5221	Acute myeloid leukemia	11	0.0175
564	Glycerophospholipid metabolism	15	0.0192
5032	Morphine addiction	15	0.0192
4921	Oxytocin signaling pathway	22	0.0204
4910	Insulin signaling pathway	20	0.0211
4540	Gap junction	14	0.03
4150	mTOR signaling pathway	11	0.0313
4151	PI3K-Akt signaling pathway	40	0.0321
5161	Hepatitis B	20	0.0347
3015	mRNA surveillance pathway	14	0.0382
4152	AMPK signaling pathway	18	0.0387
4662	B cell receptor signaling pathway	12	0.0387
4961	Endocrine and other factor-regulated calcium reabsorption	10	0.0387
4621	NOD-like receptor signaling pathway	10	0.0476
5164	Influenza A	22	0.0476
