# Supplementary material for: Progression of pathology in PINK1-deficient mouse brain from splicing via ubiquitination, ER stress, and mitophagy changes to neuroinflammation
Source: J Neuroinflammation. 2017 Aug 2;14:154. doi: 10.1186/s12974-017-0928-0 (PMC5541666; doi:10.1186/s12974-017-0928-0)
Supplement: Supplementary file 5 — GSEA bioinformatics assessment—ranked pathways by age. Ranked pathway dysregulations are shown separately on different datasheets for the predefined Reactome and KEGG gene sets regarding down- and upregulations, and progressive ages. Green background colors for the nominal p value and the False Discovery Rate q values indicate significance according to GSEA recommendations. Neuroinflammation pathways are highlighted in red color, MAPK signaling in purple, Parkinson’s disease in yellow, ubiquitination pathways in blue, endoplasmic reticulum stress response pathways in orange, the mTOR signaling pathway (mimicked by starvation stress during in vitro experiments) in dark gray, the vesicular pathways in light brown. (XLSX 123 kb) [file 12974_2017_928_MOESM5_ESM.xlsx]

## Sheet: GSEA_Reactome_CW6_down
NAME	SIZE	NES	NOM p-val	FDR q-val	FWER p-val
REACTOME_GABA_SYNTHESIS_RELEASE_REUPTAKE_AND_DEGRADATION	16	-1.98203	0	0.345297	0.279
REACTOME_PIP3_ACTIVATES_AKT_SIGNALING	17	-1.96617	0.00163399	0.202003	0.318
REACTOME_LYSOSOME_VESICLE_BIOGENESIS	16	-1.96258	0.00322061	0.138251	0.324
REACTOME_PI3K_EVENTS_IN_ERBB4_SIGNALING	23	-1.84783	0.00952381	0.247966	0.607
REACTOME_POST_NMDA_RECEPTOR_ACTIVATION_EVENTS	30	-1.82414	0.00611621	0.233778	0.668
REACTOME_SIGNALING_BY_EGFR_IN_CANCER	78	-1.82142	0	0.199964	0.681
REACTOME_GAB1_SIGNALOSOME	24	-1.80049	0.0048	0.195414	0.735
REACTOME_PI3K_EVENTS_IN_ERBB2_SIGNALING	27	-1.78298	0.0107362	0.191905	0.779
REACTOME_NGF_SIGNALLING_VIA_TRKA_FROM_THE_PLASMA_MEMBRANE	105	-1.7751	0	0.178905	0.789
REACTOME_TRANS_GOLGI_NETWORK_VESICLE_BUDDING	42	-1.76412	0.00291121	0.173139	0.812
REACTOME_NEUROTRANSMITTER_RELEASE_CYCLE	32	-1.74966	0.0114778	0.171403	0.841
REACTOME_SIGNALING_BY_ERBB2	70	-1.74774	0.00407056	0.159707	0.843
REACTOME_PI3K_AKT_ACTIVATION	24	-1.74708	0.0136157	0.148089	0.844
REACTOME_GOLGI_ASSOCIATED_VESICLE_BIOGENESIS	38	-1.74502	0.00917431	0.139723	0.847
REACTOME_EGFR_DOWNREGULATION	17	-1.7114	0.0142857	0.162852	0.911
REACTOME_ACTIVATION_OF_NMDA_RECEPTOR_UPON_GLUTAMATE_BINDING_AND_POSTSYNAPTIC_EVENTS	34	-1.70683	0.00440529	0.156702	0.916
REACTOME_RECYCLING_PATHWAY_OF_L1	21	-1.70032	0.0180451	0.154451	0.926
REACTOME_CREB_PHOSPHORYLATION_THROUGH_THE_ACTIVATION_OF_RAS	24	-1.6924	0.0165414	0.154407	0.933
REACTOME_DESTABILIZATION_OF_MRNA_BY_AUF1_HNRNP_D0	26	-1.68422	0.0107527	0.154172	0.941
REACTOME_DOWNSTREAM_SIGNALING_EVENTS_OF_B_CELL_RECEPTOR_BCR	53	-1.67676	0.0103093	0.153924	0.949
REACTOME_MAPK_TARGETS_NUCLEAR_EVENTS_MEDIATED_BY_MAP_KINASES	27	-1.67269	0.0171607	0.151096	0.952
REACTOME_TRIF_MEDIATED_TLR3_SIGNALING	50	-1.65979	0.0125174	0.157575	0.959
REACTOME_SMOOTH_MUSCLE_CONTRACTION	17	-1.64577	0.0231788	0.166754	0.971
REACTOME_PROTEIN_FOLDING	28	-1.63911	0.0319489	0.167106	0.976
REACTOME_ENOS_ACTIVATION_AND_REGULATION	17	-1.6339	0.0212072	0.166183	0.978
REACTOME_DOWNSTREAM_SIGNAL_TRANSDUCTION	71	-1.62953	0.0150068	0.164502	0.982
REACTOME_TRAF6_MEDIATED_INDUCTION_OF_NFKB_AND_MAP_KINASES_UPON_TLR7_8_OR_9_ACTIVATION	50	-1.60832	0.015919	0.181311	0.992
REACTOME_PI_METABOLISM	33	-1.59151	0.014771	0.195692	0.998
REACTOME_RNA_POL_I_TRANSCRIPTION	18	-1.57487	0.0345912	0.210563	0.998
REACTOME_SIGNALING_BY_SCF_KIT	51	-1.568	0.0101156	0.212924	0.998
REACTOME_SIGNALING_BY_THE_B_CELL_RECEPTOR_BCR	76	-1.56171	0.0210674	0.215736	0.998
REACTOME_TOLL_RECEPTOR_CASCADES	74	-1.5576	0.0149457	0.215248	0.999
REACTOME_MYOGENESIS	18	-1.5552	0.0369181	0.211739	0.999
REACTOME_NFKB_AND_MAP_KINASES_ACTIVATION_MEDIATED_BY_TLR4_SIGNALING_REPERTOIRE	51	-1.55301	0.0208623	0.208293	0.999
REACTOME_MEMBRANE_TRAFFICKING	73	-1.53974	0.0141443	0.221378	1
REACTOME_LOSS_OF_NLP_FROM_MITOTIC_CENTROSOMES	34	-1.53452	0.0308166	0.222852	1
REACTOME_SIGNALLING_BY_NGF	171	-1.5274	0.00486618	0.227417	1
REACTOME_CD28_CO_STIMULATION	21	-1.52534	0.0463679	0.224294	1
REACTOME_RAS_ACTIVATION_UOPN_CA2_INFUX_THROUGH_NMDA_RECEPTOR	15	-1.51244	0.040625	0.237119	1
REACTOME_CD28_DEPENDENT_PI3K_AKT_SIGNALING	15	-1.51022	0.0398671	0.234481	1
REACTOME_SIGNALING_BY_PDGF	95	-1.50217	0.0202156	0.240356	1
REACTOME_MAP_KINASE_ACTIVATION_IN_TLR_CASCADE	37	-1.49297	0.0423977	0.248471	1
REACTOME_REGULATION_OF_MRNA_STABILITY_BY_PROTEINS_THAT_BIND_AU_RICH_ELEMENTS	47	-1.47567	0.0294944	0.269202	1
REACTOME_G_BETA_GAMMA_SIGNALLING_THROUGH_PI3KGAMMA	20	-1.47127	0.0703125	0.270277	1
REACTOME_INFLUENZA_LIFE_CYCLE	71	-1.46665	0.0471063	0.272433	1
REACTOME_MHC_CLASS_II_ANTIGEN_PRESENTATION	50	-1.46088	0.0434153	0.27609	1
REACTOME_MYD88_MAL_CASCADE_INITIATED_ON_PLASMA_MEMBRANE	56	-1.45641	0.0365682	0.277735	1
REACTOME_PHOSPHOLIPID_METABOLISM	111	-1.45314	0.0236842	0.277323	1
REACTOME_TRANSMISSION_ACROSS_CHEMICAL_SYNAPSES	156	-1.44792	0.0134146	0.280593	1
REACTOME_SIGNALING_BY_ERBB4	58	-1.44613	0.046875	0.27857	1
REACTOME_INNATE_IMMUNE_SYSTEM	122	-1.44128	0.0283871	0.2809	1
REACTOME_RECRUITMENT_OF_MITOTIC_CENTROSOME_PROTEINS_AND_COMPLEXES	38	-1.43583	0.0661871	0.284358	1
REACTOME_ACTIVATED_TLR4_SIGNALLING	62	-1.43381	0.0546218	0.28251	1
REACTOME_TRIGLYCERIDE_BIOSYNTHESIS	25	-1.43149	0.0601266	0.281725	1
REACTOME_ASSOCIATION_OF_TRIC_CCT_WITH_TARGET_PROTEINS_DURING_BIOSYNTHESIS	18	-1.41055	0.088189	0.313897	1
REACTOME_BASIGIN_INTERACTIONS	17	-1.40184	0.0883797	0.325313	1
REACTOME_COSTIMULATION_BY_THE_CD28_FAMILY	32	-1.38536	0.0903614	0.352313	1
REACTOME_TRAF6_MEDIATED_NFKB_ACTIVATION	15	-1.38054	0.104	0.355849	1
REACTOME_SEMAPHORIN_INTERACTIONS	53	-1.3659	0.0921659	0.379352	1
REACTOME_METABOLISM_OF_CARBOHYDRATES	128	-1.36536	0.0388471	0.374338	1
REACTOME_SIGNAL_TRANSDUCTION_BY_L1	31	-1.35487	0.104545	0.391109	1
REACTOME_NEURONAL_SYSTEM	218	-1.35153	0.0398551	0.392801	1
REACTOME_SIGNALLING_TO_ERKS	27	-1.35116	0.0962145	0.387447	1
REACTOME_SIGNALING_BY_FGFR	72	-1.35004	0.0692521	0.383865	1
REACTOME_DOWNSTREAM_SIGNALING_OF_ACTIVATED_FGFR	67	-1.34789	0.070028	0.38275	1
REACTOME_ADAPTIVE_IMMUNE_SYSTEM	317	-1.34776	0.0201117	0.377255	1
REACTOME_MITOTIC_G2_G2_M_PHASES	48	-1.3406	0.0984308	0.387222	1
REACTOME_REGULATION_OF_INSULIN_SECRETION	64	-1.33002	0.0735502	0.403918	1
REACTOME_SEMA4D_INDUCED_CELL_MIGRATION_AND_GROWTH_CONE_COLLAPSE	18	-1.32002	0.137224	0.420819	1
REACTOME_SIGNALING_BY_FGFR_IN_DISEASE	83	-1.31792	0.0782967	0.419871	1
REACTOME_REGULATION_OF_INSULIN_SECRETION_BY_GLUCAGON_LIKE_PEPTIDE1	35	-1.31472	0.109737	0.421785	1
REACTOME_DARPP_32_EVENTS	19	-1.30876	0.150155	0.429779	1
REACTOME_APOPTOTIC_EXECUTION_PHASE	38	-1.30756	0.133431	0.426463	1
REACTOME_SYNTHESIS_OF_PIPS_AT_THE_PLASMA_MEMBRANE	21	-1.30715	0.132075	0.421405	1
REACTOME_DEVELOPMENTAL_BIOLOGY	257	-1.30695	0.041049	0.416207	1
REACTOME_PI_3K_CASCADE	32	-1.3066	0.118361	0.411446	1
REACTOME_POST_TRANSLATIONAL_PROTEIN_MODIFICATION	89	-1.30107	0.0914052	0.418218	1
REACTOME_DOWNSTREAM_TCR_SIGNALING	19	-1.29702	0.136943	0.42173	1
REACTOME_RESPONSE_TO_ELEVATED_PLATELET_CYTOSOLIC_CA2_	46	-1.2946	0.107914	0.422051	1
REACTOME_INTRINSIC_PATHWAY_FOR_APOPTOSIS	20	-1.28533	0.18138	0.437974	1
REACTOME_NEUROTRANSMITTER_RECEPTOR_BINDING_AND_DOWNSTREAM_TRANSMISSION_IN_THE_POSTSYNAPTIC_CELL	109	-1.28315	0.104	0.437706	1
REACTOME_PRE_NOTCH_EXPRESSION_AND_PROCESSING	29	-1.28235	0.159126	0.434163	1
REACTOME_MRNA_SPLICING	48	-1.27244	0.127479	0.452449	1
REACTOME_METABOLISM_OF_LIPIDS_AND_LIPOPROTEINS	256	-1.27237	0.0545877	0.44719	1
REACTOME_AXON_GUIDANCE	189	-1.26929	0.0767386	0.449415	1
REACTOME_G_PROTEIN_BETA_GAMMA_SIGNALLING	22	-1.2678	0.157321	0.447775	1
REACTOME_GLUCOSE_TRANSPORT	25	-1.2662	0.141215	0.446419	1
REACTOME_METABOLISM_OF_MRNA	111	-1.25905	0.0985353	0.458129	1
REACTOME_RNA_POL_I_RNA_POL_III_AND_MITOCHONDRIAL_TRANSCRIPTION	40	-1.25112	0.169811	0.471477	1
REACTOME_HEMOSTASIS	274	-1.24864	0.0632184	0.47186	1
REACTOME_ION_TRANSPORT_BY_P_TYPE_ATPASES	21	-1.23965	0.194362	0.488698	1
REACTOME_SIGNAL_AMPLIFICATION	24	-1.23221	0.201248	0.501551	1
REACTOME_L1CAM_INTERACTIONS	58	-1.2289	0.170391	0.503918	1
REACTOME_DEPOSITION_OF_NEW_CENPA_CONTAINING_NUCLEOSOMES_AT_THE_CENTROMERE	15	-1.21036	0.235197	0.544979	1
REACTOME_MRNA_PROCESSING	78	-1.20559	0.167358	0.550925	1
REACTOME_ION_CHANNEL_TRANSPORT	37	-1.20299	0.209302	0.551908	1
REACTOME_DIABETES_PATHWAYS	78	-1.20216	0.181208	0.548415	1
REACTOME_ACTIVATION_OF_KAINATE_RECEPTORS_UPON_GLUTAMATE_BINDING	24	-1.19706	0.227848	0.555447	1
REACTOME_INHIBITION_OF_INSULIN_SECRETION_BY_ADRENALINE_NORADRENALINE	22	-1.19215	0.235659	0.562557	1
REACTOME_THE_ROLE_OF_NEF_IN_HIV1_REPLICATION_AND_DISEASE_PATHOGENESIS	20	-1.18265	0.240506	0.582092	1
REACTOME_IL_3_5_AND_GM_CSF_SIGNALING	29	-1.18246	0.250746	0.576762	1
REACTOME_PLATELET_ACTIVATION_SIGNALING_AND_AGGREGATION	138	-1.17727	0.157035	0.584783	1
REACTOME_MUSCLE_CONTRACTION	30	-1.1772	0.237609	0.579312	1
REACTOME_NUCLEAR_EVENTS_KINASE_AND_TRANSCRIPTION_FACTOR_ACTIVATION	21	-1.17671	0.250789	0.574866	1
REACTOME_NEPHRIN_INTERACTIONS	15	-1.17357	0.27541	0.577541	1
REACTOME_REGULATION_OF_SIGNALING_BY_CBL	16	-1.15901	0.271722	0.610495	1
REACTOME_GLYCOSAMINOGLYCAN_METABOLISM	56	-1.15629	0.231672	0.611799	1
REACTOME_G_PROTEIN_ACTIVATION	21	-1.15474	0.27057	0.609983	1
REACTOME_DEADENYLATION_DEPENDENT_MRNA_DECAY	25	-1.15424	0.289355	0.605752	1
REACTOME_HS_GAG_BIOSYNTHESIS	19	-1.1516	0.303738	0.607204	1
REACTOME_APOPTOSIS	88	-1.1507	0.227696	0.604544	1
REACTOME_HOST_INTERACTIONS_OF_HIV_FACTORS	76	-1.1486	0.234973	0.604088	1
REACTOME_METABOLISM_OF_RNA	136	-1.14854	0.22023	0.59892	1
REACTOME_TRANSCRIPTION	92	-1.14814	0.203779	0.594637	1
REACTOME_G1_PHASE	22	-1.1453	0.28483	0.596963	1
REACTOME_ANTIVIRAL_MECHANISM_BY_IFN_STIMULATED_GENES	45	-1.14124	0.248538	0.602207	1
REACTOME_GABA_RECEPTOR_ACTIVATION	44	-1.13688	0.261314	0.60913	1
REACTOME_GLYCEROPHOSPHOLIPID_BIOSYNTHESIS	46	-1.13088	0.280488	0.619364	1
REACTOME_PROCESSING_OF_CAPPED_INTRON_CONTAINING_PRE_MRNA	69	-1.12168	0.274105	0.637893	1
REACTOME_INHIBITION_OF_VOLTAGE_GATED_CA2_CHANNELS_VIA_GBETA_GAMMA_SUBUNITS	20	-1.11918	0.298273	0.639107	1
REACTOME_METABOLISM_OF_PROTEINS	208	-1.11681	0.226841	0.639987	1
REACTOME_INWARDLY_RECTIFYING_K_CHANNELS	24	-1.11666	0.302469	0.635127	1
REACTOME_AMYLOIDS	18	-1.11248	0.330757	0.64122	1
REACTOME_CLASS_I_MHC_MEDIATED_ANTIGEN_PROCESSING_PRESENTATION	150	-1.11131	0.249042	0.639106	1
REACTOME_INTEGRATION_OF_ENERGY_METABOLISM	82	-1.10865	0.274648	0.640919	1
REACTOME_HEPARAN_SULFATE_HEPARIN_HS_GAG_METABOLISM	30	-1.10835	0.326121	0.636636	1
REACTOME_KERATAN_SULFATE_BIOSYNTHESIS	16	-1.103	0.35122	0.645415	1
REACTOME_SPHINGOLIPID_METABOLISM	33	-1.09551	0.314286	0.659435	1
REACTOME_MITOTIC_PROMETAPHASE	48	-1.09452	0.31994	0.656897	1
REACTOME_KERATAN_SULFATE_KERATIN_METABOLISM	18	-1.09241	0.363636	0.657017	1
REACTOME_ADP_SIGNALLING_THROUGH_P2RY1	19	-1.0891	0.352751	0.660735	1
REACTOME_RIG_I_MDA5_MEDIATED_INDUCTION_OF_IFN_ALPHA_BETA_PATHWAYS	35	-1.08581	0.329377	0.6642	1
REACTOME_FACTORS_INVOLVED_IN_MEGAKARYOCYTE_DEVELOPMENT_AND_PLATELET_PRODUCTION	63	-1.08304	0.326733	0.666009	1
REACTOME_HIV_INFECTION	122	-1.07338	0.319231	0.685919	1
REACTOME_GLUCOSE_METABOLISM	39	-1.06413	0.34963	0.705004	1
REACTOME_NUCLEAR_RECEPTOR_TRANSCRIPTION_PATHWAY	31	-1.06347	0.373846	0.701616	1
REACTOME_CIRCADIAN_CLOCK	36	-1.06239	0.347158	0.699454	1
REACTOME_NEGATIVE_REGULATORS_OF_RIG_I_MDA5_SIGNALING	17	-1.06208	0.375806	0.695207	1
REACTOME_LATE_PHASE_OF_HIV_LIFE_CYCLE	63	-1.05306	0.370787	0.713402	1
REACTOME_PKB_MEDIATED_EVENTS	18	-1.0474	0.40412	0.722983	1
REACTOME_ADP_SIGNALLING_THROUGH_P2RY12	18	-1.0433	0.406452	0.728487	1
REACTOME_TGF_BETA_RECEPTOR_SIGNALING_ACTIVATES_SMADS	18	-1.04318	0.4081	0.723643	1
REACTOME_APOPTOTIC_CLEAVAGE_OF_CELLULAR_PROTEINS	30	-1.0356	0.395023	0.739218	1
REACTOME_ERK_MAPK_TARGETS	18	-1.0333	0.437396	0.740367	1
REACTOME_CELL_CYCLE_MITOTIC	179	-1.01966	0.403206	0.770941	1
REACTOME_SIGNALING_BY_ILS	71	-1.01188	0.439891	0.786228	1
REACTOME_ASPARAGINE_N_LINKED_GLYCOSYLATION	48	-1.00852	0.42899	0.790186	1
REACTOME_SIGNALLING_TO_RAS	21	-1.00821	0.436817	0.785514	1
REACTOME_CELL_CYCLE	209	-1.00777	0.428212	0.781483	1
REACTOME_SIGNALING_BY_INSULIN_RECEPTOR	64	-0.993454	0.46238	0.813824	1
REACTOME_INTEGRIN_ALPHAIIB_BETA3_SIGNALING	21	-0.991833	0.482549	0.812961	1
REACTOME_PRE_NOTCH_TRANSCRIPTION_AND_TRANSLATION	19	-0.988652	0.478939	0.815279	1
REACTOME_LIGAND_GATED_ION_CHANNEL_TRANSPORT	16	-0.98523	0.4832	0.819014	1
REACTOME_CA_DEPENDENT_EVENTS	25	-0.985031	0.474809	0.814169	1
REACTOME_PYRUVATE_METABOLISM_AND_CITRIC_ACID_TCA_CYCLE	23	-0.978315	0.489699	0.826512	1
REACTOME_IL_2_SIGNALING	27	-0.977591	0.506955	0.823153	1
REACTOME_CYTOKINE_SIGNALING_IN_IMMUNE_SYSTEM	155	-0.971296	0.520884	0.835026	1
REACTOME_STRIATED_MUSCLE_CONTRACTION	17	-0.967192	0.511111	0.840468	1
REACTOME_INTERACTIONS_OF_VPR_WITH_HOST_CELLULAR_PROTEINS	23	-0.966422	0.495342	0.83716	1
REACTOME_ANTIGEN_PROCESSING_UBIQUITINATION_PROTEASOME_DEGRADATION	133	-0.965513	0.541451	0.834152	1
REACTOME_REGULATION_OF_WATER_BALANCE_BY_RENAL_AQUAPORINS	34	-0.964875	0.50655	0.830553	1
REACTOME_MITOCHONDRIAL_PROTEIN_IMPORT	26	-0.956026	0.503086	0.848575	1
REACTOME_RNA_POL_II_PRE_TRANSCRIPTION_EVENTS	32	-0.955996	0.520548	0.843449	1
REACTOME_PLC_BETA_MEDIATED_EVENTS	35	-0.953506	0.51497	0.844577	1
REACTOME_HIV_LIFE_CYCLE	75	-0.950816	0.537088	0.846134	1
REACTOME_CELL_CYCLE_CHECKPOINTS	62	-0.949936	0.516575	0.84334	1
REACTOME_G2_M_CHECKPOINTS	22	-0.94683	0.552995	0.845981	1
REACTOME_INFLUENZA_VIRAL_RNA_TRANSCRIPTION_AND_REPLICATION	45	-0.942349	0.568314	0.851986	1
REACTOME_MRNA_3_END_PROCESSING	18	-0.93723	0.523126	0.859851	1
REACTOME_OPIOID_SIGNALLING	62	-0.936121	0.546703	0.857613	1
REACTOME_NUCLEOTIDE_BINDING_DOMAIN_LEUCINE_RICH_REPEAT_CONTAINING_RECEPTOR_NLR_SIGNALING_PATHWAYS	26	-0.925161	0.550445	0.880371	1
REACTOME_GLYCOSPHINGOLIPID_METABOLISM	21	-0.924096	0.542813	0.8781	1
REACTOME_DAG_AND_IP3_SIGNALING	26	-0.923882	0.576453	0.87357	1
REACTOME_ACTIVATION_OF_NF_KAPPAB_IN_B_CELLS	33	-0.916815	0.58797	0.885744	1
REACTOME_GENERIC_TRANSCRIPTION_PATHWAY	84	-0.911052	0.610193	0.895134	1
REACTOME_DOWNREGULATION_OF_TGF_BETA_RECEPTOR_SIGNALING	15	-0.907137	0.568323	0.899042	1
REACTOME_LIPID_DIGESTION_MOBILIZATION_AND_TRANSPORT	26	-0.904035	0.62037	0.901312	1
REACTOME_AQUAPORIN_MEDIATED_TRANSPORT	36	-0.899943	0.627737	0.9058	1
REACTOME_ELONGATION_ARREST_AND_RECOVERY	20	-0.895275	0.599693	0.912068	1
REACTOME_CELL_CELL_COMMUNICATION	84	-0.892074	0.650273	0.9144	1
REACTOME_ORC1_REMOVAL_FROM_CHROMATIN	32	-0.889406	0.635945	0.915491	1
REACTOME_TRANSPORT_OF_RIBONUCLEOPROTEINS_INTO_THE_HOST_NUCLEUS	20	-0.885987	0.599691	0.918597	1
REACTOME_P53_DEPENDENT_G1_DNA_DAMAGE_RESPONSE	28	-0.884849	0.638037	0.91642	1
REACTOME_PLATELET_AGGREGATION_PLUG_FORMATION	26	-0.884818	0.622793	0.911528	1
REACTOME_ANTIGEN_PROCESSING_CROSS_PRESENTATION	34	-0.87877	0.658358	0.920495	1
REACTOME_RNA_POL_II_TRANSCRIPTION	56	-0.877388	0.666667	0.918884	1
REACTOME_ANTIGEN_ACTIVATES_B_CELL_RECEPTOR_LEADING_TO_GENERATION_OF_SECOND_MESSENGERS	23	-0.870719	0.653673	0.928933	1
REACTOME_GPVI_MEDIATED_ACTIVATION_CASCADE	25	-0.870484	0.655008	0.924432	1
REACTOME_VIF_MEDIATED_DEGRADATION_OF_APOBEC3G	24	-0.870168	0.653481	0.92031	1
REACTOME_POTASSIUM_CHANNELS	73	-0.869507	0.696202	0.917057	1
REACTOME_INSULIN_RECEPTOR_SIGNALLING_CASCADE	54	-0.865532	0.690304	0.921044	1
REACTOME_SIGNALING_BY_BMP	16	-0.865278	0.664596	0.916702	1
REACTOME_THROMBIN_SIGNALLING_THROUGH_PROTEINASE_ACTIVATED_RECEPTORS_PARS	22	-0.864879	0.649762	0.912796	1
REACTOME_O_LINKED_GLYCOSYLATION_OF_MUCINS	22	-0.864666	0.64869	0.908531	1
REACTOME_TRANSMEMBRANE_TRANSPORT_OF_SMALL_MOLECULES	255	-0.862401	0.780347	0.908951	1
REACTOME_PLATELET_HOMEOSTASIS	54	-0.861746	0.689655	0.905694	1
REACTOME_GABA_B_RECEPTOR_ACTIVATION	31	-0.860936	0.69378	0.902713	1
REACTOME_CHOLESTEROL_BIOSYNTHESIS	17	-0.859704	0.652713	0.900716	1
REACTOME_NCAM_SIGNALING_FOR_NEURITE_OUT_GROWTH	45	-0.859609	0.687407	0.896362	1
REACTOME_CELL_JUNCTION_ORGANIZATION	51	-0.858637	0.677054	0.89394	1
REACTOME_THROMBOXANE_SIGNALLING_THROUGH_TP_RECEPTOR	17	-0.849916	0.68277	0.907246	1
REACTOME_SIGNALING_BY_NOTCH	70	-0.849347	0.709722	0.904079	1
REACTOME_FORMATION_OF_RNA_POL_II_ELONGATION_COMPLEX_	24	-0.847153	0.675758	0.904502	1
REACTOME_TCR_SIGNALING	33	-0.845361	0.688857	0.903813	1
REACTOME_RNA_POL_III_TRANSCRIPTION	20	-0.839652	0.669811	0.911069	1
REACTOME_LIPOPROTEIN_METABOLISM	15	-0.838727	0.661882	0.908595	1
REACTOME_N_GLYCAN_ANTENNAE_ELONGATION_IN_THE_MEDIAL_TRANS_GOLGI	15	-0.832504	0.695431	0.916662	1
REACTOME_TRANSPORT_TO_THE_GOLGI_AND_SUBSEQUENT_MODIFICATION	23	-0.830327	0.713851	0.91647	1
REACTOME_ASSEMBLY_OF_THE_PRE_REPLICATIVE_COMPLEX	31	-0.82778	0.72	0.917164	1
REACTOME_SCFSKP2_MEDIATED_DEGRADATION_OF_P27_P21	28	-0.825394	0.710407	0.917369	1
REACTOME_CYCLIN_E_ASSOCIATED_EVENTS_DURING_G1_S_TRANSITION_	35	-0.81501	0.749627	0.933233	1
REACTOME_TRANSPORT_OF_MATURE_MRNA_DERIVED_FROM_AN_INTRONLESS_TRANSCRIPT	23	-0.811241	0.752294	0.936222	1
REACTOME_BMAL1_CLOCK_NPAS2_ACTIVATES_CIRCADIAN_EXPRESSION	25	-0.810567	0.71129	0.933051	1
REACTOME_INTERFERON_SIGNALING	85	-0.802994	0.819783	0.942392	1
REACTOME_AUTODEGRADATION_OF_THE_E3_UBIQUITIN_LIGASE_COP1	23	-0.802885	0.759939	0.938227	1
REACTOME_PROSTACYCLIN_SIGNALLING_THROUGH_PROSTACYCLIN_RECEPTOR	15	-0.80105	0.708202	0.937287	1
REACTOME_NEP_NS2_INTERACTS_WITH_THE_CELLULAR_EXPORT_MACHINERY	20	-0.796638	0.742623	0.941211	1
REACTOME_REGULATION_OF_GLUCOKINASE_BY_GLUCOKINASE_REGULATORY_PROTEIN	18	-0.791382	0.741987	0.946287	1
REACTOME_SIGNALING_BY_ROBO_RECEPTOR	25	-0.787122	0.763278	0.949308	1
REACTOME_TRANSCRIPTIONAL_REGULATION_OF_WHITE_ADIPOCYTE_DIFFERENTIATION	31	-0.785014	0.807069	0.948442	1
REACTOME_ADHERENS_JUNCTIONS_INTERACTIONS	19	-0.782367	0.741554	0.948677	1
REACTOME_INTERFERON_GAMMA_SIGNALING	30	-0.780669	0.794992	0.947359	1
REACTOME_DNA_REPLICATION	103	-0.77888	0.866841	0.946146	1
REACTOME_FATTY_ACID_TRIACYLGLYCEROL_AND_KETONE_BODY_METABOLISM	95	-0.776001	0.848485	0.946649	1
REACTOME_PURINE_METABOLISM	26	-0.76533	0.791976	0.959273	1
REACTOME_ER_PHAGOSOME_PATHWAY	27	-0.756462	0.8192	0.968701	1
REACTOME_MITOTIC_M_M_G1_PHASES	90	-0.748589	0.877809	0.97602	1
REACTOME_SIGNALING_BY_TGF_BETA_RECEPTOR_COMPLEX	45	-0.736309	0.866667	0.989062	1
REACTOME_MEIOTIC_SYNAPSIS	25	-0.727918	0.84345	0.995758	1
REACTOME_AUTODEGRADATION_OF_CDH1_BY_CDH1_APC_C	30	-0.725791	0.862285	0.994165	1
REACTOME_TRNA_AMINOACYLATION	16	-0.722944	0.834139	0.99346	1
REACTOME_RNA_POL_II_TRANSCRIPTION_PRE_INITIATION_AND_PROMOTER_OPENING	19	-0.721366	0.848392	0.991088	1
REACTOME_EFFECTS_OF_PIP2_HYDROLYSIS	19	-0.70507	0.865204	1	1
REACTOME_PHOSPHOLIPASE_C_MEDIATED_CASCADE	37	-0.704221	0.911722	1	1
REACTOME_G_ALPHA1213_SIGNALLING_EVENTS	60	-0.699197	0.925722	1	1
REACTOME_RNA_POL_III_TRANSCRIPTION_INITIATION_FROM_TYPE_3_PROMOTER	15	-0.696696	0.852273	1	1
REACTOME_NONSENSE_MEDIATED_DECAY_ENHANCED_BY_THE_EXON_JUNCTION_COMPLEX	48	-0.695362	0.939394	0.999605	1
REACTOME_PI3K_CASCADE	41	-0.693382	0.917431	0.99749	1
REACTOME_AMINE_COMPOUND_SLC_TRANSPORTERS	16	-0.692293	0.851852	0.99444	1
REACTOME_NRAGE_SIGNALS_DEATH_THROUGH_JNK	37	-0.682409	0.918519	0.999775	1
REACTOME_TRANSPORT_OF_GLUCOSE_AND_OTHER_SUGARS_BILE_SALTS_AND_ORGANIC_ACIDS_METAL_IONS_AND_AMINE_COMPOUNDS	53	-0.67994	0.939394	0.997808	1
REACTOME_REGULATION_OF_ORNITHINE_DECARBOXYLASE_ODC	25	-0.674968	0.905689	0.998378	1
REACTOME_IL1_SIGNALING	23	-0.674922	0.913462	0.994321	1
REACTOME_P75_NTR_RECEPTOR_MEDIATED_SIGNALLING	64	-0.66633	0.948179	0.997675	1
REACTOME_TRANSPORT_OF_MATURE_TRANSCRIPT_TO_CYTOPLASM	33	-0.660066	0.935681	0.998975	1
REACTOME_GLUCAGON_SIGNALING_IN_METABOLIC_REGULATION	27	-0.654586	0.933934	0.998998	1
REACTOME_TCA_CYCLE_AND_RESPIRATORY_ELECTRON_TRANSPORT	52	-0.65224	0.959596	0.996662	1
REACTOME_G_BETA_GAMMA_SIGNALLING_THROUGH_PLC_BETA	16	-0.63328	0.915493	1	1
REACTOME_PEPTIDE_CHAIN_ELONGATION	36	-0.633058	0.962519	1	1
REACTOME_TRANSPORT_OF_VITAMINS_NUCLEOSIDES_AND_RELATED_MOLECULES	19	-0.627821	0.926791	1	1
REACTOME_CLEAVAGE_OF_GROWING_TRANSCRIPT_IN_THE_TERMINATION_REGION_	23	-0.620507	0.943077	1	1
REACTOME_CDK_MEDIATED_PHOSPHORYLATION_AND_REMOVAL_OF_CDC6	21	-0.616109	0.954899	0.999227	1
REACTOME_CROSS_PRESENTATION_OF_SOLUBLE_EXOGENOUS_ANTIGENS_ENDOSOMES	23	-0.609155	0.944694	0.998895	1
REACTOME_CDT1_ASSOCIATION_WITH_THE_CDC6_ORC_ORIGIN_COMPLEX	24	-0.606255	0.952012	0.996304	1
REACTOME_NETRIN1_SIGNALING	31	-0.602852	0.958457	0.993891	1
REACTOME_SIGNALING_BY_FGFR1_MUTANTS	18	-0.602849	0.953704	0.990008	1
REACTOME_DNA_STRAND_ELONGATION	21	-0.595953	0.944272	0.989058	1
REACTOME_ACTIVATION_OF_ATR_IN_RESPONSE_TO_REPLICATION_STRESS	18	-0.586098	0.948113	0.989021	1
REACTOME_METABOLISM_OF_NON_CODING_RNA	27	-0.558833	0.974203	0.993988	1
REACTOME_G_ALPHA_Z_SIGNALLING_EVENTS	37	-0.557631	0.985229	0.990482	1
REACTOME_SRP_DEPENDENT_COTRANSLATIONAL_PROTEIN_TARGETING_TO_MEMBRANE	51	-0.544469	0.992997	0.98983	1
REACTOME_P53_INDEPENDENT_G1_S_DNA_DAMAGE_CHECKPOINT	25	-0.540402	0.991896	0.986961	1

## Sheet: GSEA_KEGG_CW6_down
NAME	SIZE	NES	NOM p-val	FDR q-val	FWER p-val
KEGG_SNARE_INTERACTIONS_IN_VESICULAR_TRANSPORT	24	-1.87538	0	0.293836	0.242
KEGG_SPLICEOSOME	57	-1.84212	0	0.189229	0.298
KEGG_PARKINSONS_DISEASE	53	-1.77534	0.00716332	0.204485	0.441
KEGG_ANTIGEN_PROCESSING_AND_PRESENTATION	27	-1.7683	0.01059	0.161968	0.457
KEGG_STARCH_AND_SUCROSE_METABOLISM	18	-1.76	0.0126183	0.139438	0.478
KEGG_CHRONIC_MYELOID_LEUKEMIA	63	-1.69762	0.00137552	0.171895	0.635
KEGG_PROSTATE_CANCER	69	-1.6913	0.00691563	0.153514	0.652
KEGG_ENDOCYTOSIS	114	-1.68789	0.00263852	0.136679	0.656
KEGG_LONG_TERM_POTENTIATION	55	-1.6714	0.0155367	0.132315	0.689
KEGG_MAPK_SIGNALING_PATHWAY	198	-1.63695	0.00120482	0.14719	0.775
KEGG_PRION_DISEASES	22	-1.60494	0.021978	0.168182	0.843
KEGG_NEUROTROPHIN_SIGNALING_PATHWAY	102	-1.59654	0.00530504	0.163467	0.863
KEGG_UBIQUITIN_MEDIATED_PROTEOLYSIS	96	-1.56751	0.0105125	0.180533	0.901
KEGG_FRUCTOSE_AND_MANNOSE_METABOLISM	21	-1.53534	0.0369181	0.208604	0.948
KEGG_PROGESTERONE_MEDIATED_OOCYTE_MATURATION	66	-1.50328	0.0314208	0.240983	0.973
KEGG_RENAL_CELL_CARCINOMA	57	-1.48892	0.0307018	0.248446	0.984
KEGG_VASOPRESSIN_REGULATED_WATER_REABSORPTION	31	-1.4531	0.057508	0.290861	0.996
KEGG_INSULIN_SIGNALING_PATHWAY	103	-1.40414	0.0432503	0.368508	0.998
KEGG_MTOR_SIGNALING_PATHWAY	38	-1.39703	0.0733533	0.365564	0.998
KEGG_GLIOMA	52	-1.38781	0.0718391	0.368595	1
KEGG_VIBRIO_CHOLERAE_INFECTION	32	-1.38419	0.0786687	0.35826	1
KEGG_EPITHELIAL_CELL_SIGNALING_IN_HELICOBACTER_PYLORI_INFECTION	43	-1.38131	0.0791789	0.347415	1
KEGG_GALACTOSE_METABOLISM	16	-1.38107	0.10299	0.332714	1
KEGG_INTESTINAL_IMMUNE_NETWORK_FOR_IGA_PRODUCTION	15	-1.3794	0.112013	0.322022	1
KEGG_APOPTOSIS	50	-1.33519	0.0898716	0.397536	1
KEGG_CHEMOKINE_SIGNALING_PATHWAY	116	-1.32068	0.0706941	0.417209	1
KEGG_BLADDER_CANCER	30	-1.30819	0.128936	0.430081	1
KEGG_FC_GAMMA_R_MEDIATED_PHAGOCYTOSIS	77	-1.29483	0.0963855	0.446467	1
KEGG_THYROID_CANCER	24	-1.29287	0.155521	0.436149	1
KEGG_VASCULAR_SMOOTH_MUSCLE_CONTRACTION	77	-1.28514	0.110644	0.438316	1
KEGG_TOLL_LIKE_RECEPTOR_SIGNALING_PATHWAY	56	-1.28176	0.122126	0.432285	1
KEGG_T_CELL_RECEPTOR_SIGNALING_PATHWAY	75	-1.28092	0.12349	0.420363	1
KEGG_ERBB_SIGNALING_PATHWAY	68	-1.26822	0.127572	0.435599	1
KEGG_SMALL_CELL_LUNG_CANCER	68	-1.26563	0.124317	0.427526	1
KEGG_ENDOMETRIAL_CANCER	41	-1.26176	0.146132	0.423987	1
KEGG_GLYCOSAMINOGLYCAN_BIOSYNTHESIS_HEPARAN_SULFATE	17	-1.25015	0.174679	0.438006	1
KEGG_B_CELL_RECEPTOR_SIGNALING_PATHWAY	57	-1.24966	0.150355	0.427456	1
KEGG_OOCYTE_MEIOSIS	76	-1.24617	0.142857	0.42412	1
KEGG_PATHOGENIC_ESCHERICHIA_COLI_INFECTION	37	-1.23351	0.167164	0.439864	1
KEGG_FOCAL_ADHESION	150	-1.22728	0.125974	0.442879	1
KEGG_LYSOSOME	76	-1.22318	0.159001	0.441814	1
KEGG_COLORECTAL_CANCER	53	-1.19849	0.186536	0.486314	1
KEGG_REGULATION_OF_ACTIN_CYTOSKELETON	153	-1.19479	0.160804	0.483735	1
KEGG_MELANOMA	52	-1.18038	0.208696	0.506353	1
KEGG_LEISHMANIA_INFECTION	34	-1.1706	0.243976	0.518457	1
KEGG_AXON_GUIDANCE	108	-1.1605	0.217391	0.530747	1
KEGG_O_GLYCAN_BIOSYNTHESIS	16	-1.15741	0.31051	0.526207	1
KEGG_ADHERENS_JUNCTION	60	-1.15634	0.237892	0.517375	1
KEGG_GLYCEROPHOSPHOLIPID_METABOLISM	47	-1.14934	0.247175	0.522575	1
KEGG_GNRH_SIGNALING_PATHWAY	71	-1.13975	0.231534	0.53478	1
KEGG_NON_SMALL_CELL_LUNG_CANCER	42	-1.13771	0.259259	0.528849	1
KEGG_CARDIAC_MUSCLE_CONTRACTION	46	-1.13127	0.285294	0.534248	1
KEGG_P53_SIGNALING_PATHWAY	44	-1.12013	0.289855	0.549311	1
KEGG_PANCREATIC_CANCER	58	-1.11504	0.272206	0.550979	1
KEGG_TIGHT_JUNCTION	83	-1.11141	0.281915	0.548871	1
KEGG_PATHWAYS_IN_CANCER	238	-1.10768	0.256228	0.547336	1
KEGG_OLFACTORY_TRANSDUCTION	19	-1.10528	0.327044	0.543234	1
KEGG_LYSINE_DEGRADATION	34	-1.09875	0.312782	0.548721	1
KEGG_RIG_I_LIKE_RECEPTOR_SIGNALING_PATHWAY	37	-1.09497	0.320059	0.547156	1
KEGG_AMINO_SUGAR_AND_NUCLEOTIDE_SUGAR_METABOLISM	29	-1.0483	0.403904	0.645635	1
KEGG_RNA_DEGRADATION	32	-1.04647	0.389728	0.63927	1
KEGG_ACUTE_MYELOID_LEUKEMIA	47	-1.04263	0.393064	0.63739	1
KEGG_GLYCOSPHINGOLIPID_BIOSYNTHESIS_LACTO_AND_NEOLACTO_SERIES	15	-1.02335	0.454402	0.671767	1
KEGG_PPAR_SIGNALING_PATHWAY	35	-1.01379	0.434211	0.68559	1
KEGG_NOD_LIKE_RECEPTOR_SIGNALING_PATHWAY	30	-1.00148	0.46319	0.703742	1
KEGG_DILATED_CARDIOMYOPATHY	67	-0.998831	0.455182	0.698726	1
KEGG_TYPE_II_DIABETES_MELLITUS	34	-0.974275	0.49705	0.746584	1
KEGG_REGULATION_OF_AUTOPHAGY	17	-0.965936	0.498371	0.754942	1
KEGG_ALZHEIMERS_DISEASE	85	-0.964116	0.534341	0.748283	1
KEGG_CALCIUM_SIGNALING_PATHWAY	121	-0.952393	0.54798	0.765319	1
KEGG_HUNTINGTONS_DISEASE	86	-0.951593	0.554521	0.756422	1
KEGG_HYPERTROPHIC_CARDIOMYOPATHY_HCM	61	-0.943904	0.554765	0.763572	1
KEGG_DORSO_VENTRAL_AXIS_FORMATION	17	-0.939382	0.535032	0.763752	1
KEGG_MELANOGENESIS	68	-0.933552	0.58209	0.766699	1
KEGG_ADIPOCYTOKINE_SIGNALING_PATHWAY	51	-0.923103	0.570809	0.779724	1
KEGG_SYSTEMIC_LUPUS_ERYTHEMATOSUS	31	-0.920438	0.583333	0.77502	1
KEGG_GLYCINE_SERINE_AND_THREONINE_METABOLISM	18	-0.915909	0.580696	0.775109	1
KEGG_FC_EPSILON_RI_SIGNALING_PATHWAY	55	-0.912419	0.604286	0.772935	1
KEGG_TASTE_TRANSDUCTION	19	-0.905833	0.56621	0.776268	1
KEGG_GAP_JUNCTION	57	-0.899152	0.620642	0.781499	1
KEGG_LEUKOCYTE_TRANSENDOTHELIAL_MIGRATION	78	-0.89296	0.644986	0.784751	1
KEGG_PEROXISOME	43	-0.889139	0.610242	0.782677	1
KEGG_VEGF_SIGNALING_PATHWAY	48	-0.887105	0.636624	0.777236	1
KEGG_LONG_TERM_DEPRESSION	51	-0.874164	0.653274	0.793721	1
KEGG_AMYOTROPHIC_LATERAL_SCLEROSIS_ALS	36	-0.873472	0.651403	0.785781	1
KEGG_CELL_CYCLE	84	-0.860505	0.699438	0.801315	1
KEGG_SPHINGOLIPID_METABOLISM	23	-0.820624	0.699237	0.867929	1
KEGG_ETHER_LIPID_METABOLISM	19	-0.817658	0.701893	0.863173	1
KEGG_COMPLEMENT_AND_COAGULATION_CASCADES	24	-0.815835	0.71145	0.856713	1
KEGG_ARRHYTHMOGENIC_RIGHT_VENTRICULAR_CARDIOMYOPATHY_ARVC	55	-0.807155	0.759547	0.862045	1
KEGG_WNT_SIGNALING_PATHWAY	109	-0.805082	0.847854	0.856341	1
KEGG_PHOSPHATIDYLINOSITOL_SIGNALING_SYSTEM	55	-0.802889	0.780822	0.850396	1
KEGG_OXIDATIVE_PHOSPHORYLATION	47	-0.75588	0.850852	0.914006	1
KEGG_PROTEASOME	20	-0.741654	0.801358	0.923705	1
KEGG_NICOTINATE_AND_NICOTINAMIDE_METABOLISM	15	-0.707506	0.842271	0.954165	1
KEGG_RIBOSOME	37	-0.659156	0.923538	0.988589	1
KEGG_CYTOSOLIC_DNA_SENSING_PATHWAY	23	-0.65427	0.910686	0.9816	1
KEGG_ABC_TRANSPORTERS	26	-0.612426	0.945904	0.996813	1
KEGG_CYSTEINE_AND_METHIONINE_METABOLISM	21	-0.603054	0.940718	0.990654	1
KEGG_MISMATCH_REPAIR	17	-0.549825	0.961345	0.997613	1
KEGG_ALANINE_ASPARTATE_AND_GLUTAMATE_METABOLISM	22	-0.484101	0.993721	0.996324	1

## Sheet: GSEA_Reactome_CW6_up
NAME	SIZE	NES	NOM p-val	FDR q-val	FWER p-val
REACTOME_DNA_REPAIR	66	1.72263	0.00704225	1	0.695
REACTOME_CLASS_A1_RHODOPSIN_LIKE_RECEPTORS	115	1.64042	0	0.883378	0.876
REACTOME_PEPTIDE_LIGAND_BINDING_RECEPTORS	74	1.63811	0.00362319	0.596744	0.878
REACTOME_EXTENSION_OF_TELOMERES	17	1.63655	0.0241287	0.452552	0.88
REACTOME_YAP1_AND_WWTR1_TAZ_STIMULATED_GENE_EXPRESSION	15	1.61406	0.0341207	0.420598	0.911
REACTOME_GPCR_LIGAND_BINDING	178	1.57614	0	0.441738	0.946
REACTOME_EXTRACELLULAR_MATRIX_ORGANIZATION	53	1.57404	0.0213523	0.385104	0.951
REACTOME_COLLAGEN_FORMATION	43	1.55533	0.0176471	0.376567	0.964
REACTOME_FORMATION_OF_THE_TERNARY_COMPLEX_AND_SUBSEQUENTLY_THE_43S_COMPLEX	19	1.45948	0.0874317	0.584458	0.999
REACTOME_PHASE1_FUNCTIONALIZATION_OF_COMPOUNDS	25	1.45286	0.0716418	0.544577	0.999
REACTOME_INTEGRIN_CELL_SURFACE_INTERACTIONS	59	1.43403	0.0433333	0.551362	0.999
REACTOME_BASE_EXCISION_REPAIR	16	1.40672	0.095	0.584017	0.999
REACTOME_AMINE_LIGAND_BINDING_RECEPTORS	20	1.4016	0.0906344	0.553382	1
REACTOME_LAGGING_STRAND_SYNTHESIS	15	1.3774	0.129032	0.584949	1
REACTOME_AMINO_ACID_AND_OLIGOPEPTIDE_SLC_TRANSPORTERS	31	1.36197	0.100304	0.588936	1
REACTOME_3_UTR_MEDIATED_TRANSLATIONAL_REGULATION	42	1.33026	0.104918	0.644312	1
REACTOME_DOUBLE_STRAND_BREAK_REPAIR	15	1.31111	0.137681	0.666874	1
REACTOME_GLOBAL_GENOMIC_NER_GG_NER	21	1.30111	0.130178	0.661379	1
REACTOME_NUCLEOTIDE_EXCISION_REPAIR	32	1.29772	0.125731	0.636832	1
REACTOME_TRANSCRIPTION_COUPLED_NER_TC_NER	29	1.29505	0.118841	0.612309	1
REACTOME_ACTIVATION_OF_THE_MRNA_UPON_BINDING_OF_THE_CAP_BINDING_COMPLEX_AND_EIFS_AND_SUBSEQUENT_BINDING_TO_43S	24	1.27719	0.136752	0.634182	1
REACTOME_BIOLOGICAL_OXIDATIONS	52	1.27376	0.112583	0.61496	1
REACTOME_SHC_MEDIATED_CASCADE	16	1.25702	0.186589	0.635914	1
REACTOME_G_ALPHA_I_SIGNALLING_EVENTS	90	1.25585	0.0791667	0.613402	1
REACTOME_GPCR_DOWNSTREAM_SIGNALING	250	1.22907	0.044586	0.671471	1
REACTOME_AMINO_ACID_TRANSPORT_ACROSS_THE_PLASMA_MEMBRANE	19	1.21918	0.17847	0.676708	1
REACTOME_RORA_ACTIVATES_CIRCADIAN_EXPRESSION	16	1.21498	0.208571	0.664641	1
REACTOME_PERK_REGULATED_GENE_EXPRESSION	15	1.20829	0.232558	0.660851	1
REACTOME_TRANSPORT_OF_INORGANIC_CATIONS_ANIONS_AND_AMINO_ACIDS_OLIGOPEPTIDES	59	1.20065	0.148276	0.661484	1
REACTOME_SIGNALING_BY_GPCR	323	1.19536	0.0380952	0.654641	1
REACTOME_SMAD2_SMAD3_SMAD4_HETEROTRIMER_REGULATES_TRANSCRIPTION	17	1.17905	0.262295	0.681725	1
REACTOME_IMMUNOREGULATORY_INTERACTIONS_BETWEEN_A_LYMPHOID_AND_A_NON_LYMPHOID_CELL	24	1.16629	0.252055	0.700761	1
REACTOME_GASTRIN_CREB_SIGNALLING_PATHWAY_VIA_PKC_AND_MAPK	116	1.16564	0.157407	0.681562	1
REACTOME_PPARA_ACTIVATES_GENE_EXPRESSION	54	1.15973	0.223368	0.677855	1
REACTOME_G_ALPHA_Q_SIGNALLING_EVENTS	99	1.1489	0.198444	0.688401	1
REACTOME_NITRIC_OXIDE_STIMULATES_GUANYLATE_CYCLASE	16	1.14799	0.30343	0.672291	1
REACTOME_MEIOSIS	40	1.12745	0.246951	0.717998	1
REACTOME_MEIOTIC_RECOMBINATION	21	1.12385	0.305177	0.710426	1
REACTOME_LATENT_INFECTION_OF_HOMO_SAPIENS_WITH_MYCOBACTERIUM_TUBERCULOSIS	15	1.12315	0.293507	0.694474	1
REACTOME_ACTIVATION_OF_THE_PRE_REPLICATIVE_COMPLEX	16	1.11514	0.319035	0.700895	1
REACTOME_G1_S_TRANSITION	57	1.10501	0.265957	0.713998	1
REACTOME_RESPIRATORY_ELECTRON_TRANSPORT	24	1.10311	0.312121	0.702793	1
REACTOME_METABOLISM_OF_NUCLEOTIDES	50	1.09606	0.27439	0.706501	1
REACTOME_SCF_BETA_TRCP_MEDIATED_DEGRADATION_OF_EMI1	25	1.0927	0.309942	0.6998	1
REACTOME_CELL_CELL_JUNCTION_ORGANIZATION	35	1.08032	0.321981	0.720173	1
REACTOME_UNFOLDED_PROTEIN_RESPONSE	49	1.07786	0.300971	0.711449	1
REACTOME_RESPIRATORY_ELECTRON_TRANSPORT_ATP_SYNTHESIS_BY_CHEMIOSMOTIC_COUPLING_AND_HEAT_PRODUCTION_BY_UNCOUPLING_PROTEINS_	30	1.06222	0.375375	0.741138	1
REACTOME_MICRORNA_MIRNA_BIOGENESIS	15	1.06049	0.385027	0.730681	1
REACTOME_NCAM1_INTERACTIONS	31	1.05891	0.375	0.720166	1
REACTOME_METABOLISM_OF_VITAMINS_AND_COFACTORS	38	1.05815	0.32641	0.707733	1
REACTOME_REGULATION_OF_MITOTIC_CELL_CYCLE	41	1.05812	0.367089	0.693952	1
REACTOME_FORMATION_OF_TRANSCRIPTION_COUPLED_NER_TC_NER_REPAIR_COMPLEX	16	1.04886	0.367609	0.707115	1
REACTOME_TIGHT_JUNCTION_INTERACTIONS	16	1.04861	0.368	0.694371	1
REACTOME_CHROMOSOME_MAINTENANCE	52	1.0347	0.362416	0.718213	1
REACTOME_ACTIVATION_OF_CHAPERONE_GENES_BY_XBP1S	30	1.03203	0.386628	0.71205	1
REACTOME_INTERFERON_ALPHA_BETA_SIGNALING	25	1.01052	0.424658	0.758065	1
REACTOME_MITOTIC_G1_G1_S_PHASES	72	0.993733	0.435714	0.792582	1
REACTOME_CELL_SURFACE_INTERACTIONS_AT_THE_VASCULAR_WALL	54	0.98938	0.477419	0.791836	1
REACTOME_METABOLISM_OF_AMINO_ACIDS_AND_DERIVATIVES	106	0.979965	0.508475	0.806159	1
REACTOME_NUCLEAR_SIGNALING_BY_ERBB4	25	0.977844	0.465875	0.798634	1
REACTOME_M_G1_TRANSITION	40	0.975869	0.483333	0.79177	1
REACTOME_NEGATIVE_REGULATION_OF_FGFR_SIGNALING	19	0.975034	0.452381	0.781325	1
REACTOME_TELOMERE_MAINTENANCE	25	0.974284	0.502825	0.770679	1
REACTOME_GLUCONEOGENESIS	16	0.969248	0.482759	0.77302	1
REACTOME_REGULATORY_RNA_PATHWAYS	18	0.968987	0.485714	0.761808	1
REACTOME_SEMA4D_IN_SEMAPHORIN_SIGNALING	20	0.961465	0.487535	0.769988	1
REACTOME_TRANSLATION	68	0.961197	0.516014	0.759228	1
REACTOME_FRS2_MEDIATED_CASCADE	21	0.939651	0.54712	0.805133	1
REACTOME_SLC_MEDIATED_TRANSMEMBRANE_TRANSPORT	151	0.932811	0.626866	0.811964	1
REACTOME_SIGNALING_BY_RHO_GTPASES	80	0.930543	0.627451	0.806735	1
REACTOME_ACTIVATED_NOTCH1_TRANSMITS_SIGNAL_TO_THE_NUCLEUS	19	0.928367	0.516667	0.80155	1
REACTOME_APC_C_CDC20_MEDIATED_DEGRADATION_OF_MITOTIC_PROTEINS	35	0.923607	0.633027	0.802148	1
REACTOME_METAL_ION_SLC_TRANSPORTERS	16	0.921758	0.578164	0.795775	1
REACTOME_CIRCADIAN_REPRESSION_OF_EXPRESSION_BY_REV_ERBA	15	0.920679	0.53616	0.787554	1
REACTOME_G_ALPHA_S_SIGNALLING_EVENTS	65	0.914697	0.620567	0.791537	1
REACTOME_SIGNALING_BY_HIPPO	18	0.907753	0.554974	0.797451	1
REACTOME_CLASS_B_2_SECRETIN_FAMILY_RECEPTORS	55	0.878122	0.692041	0.856359	1
REACTOME_SIGNALING_BY_WNT	34	0.868539	0.681818	0.866755	1
REACTOME_VOLTAGE_GATED_POTASSIUM_CHANNELS	34	0.868481	0.678161	0.85593	1
REACTOME_SYNTHESIS_OF_DNA	49	0.860323	0.710438	0.864017	1
REACTOME_APC_C_CDH1_MEDIATED_DEGRADATION_OF_CDC20_AND_OTHER_APC_C_CDH1_TARGETED_PROTEINS_IN_LATE_MITOSIS_EARLY_G1	35	0.859507	0.715877	0.855181	1
REACTOME_IL_RECEPTOR_SHC_SIGNALING	17	0.843222	0.668675	0.879651	1
REACTOME_TRAFFICKING_OF_AMPA_RECEPTORS	21	0.840249	0.683908	0.875308	1
REACTOME_GLUCAGON_TYPE_LIGAND_RECEPTORS	21	0.825992	0.694595	0.893112	1
REACTOME_NOD1_2_SIGNALING_PATHWAY	18	0.824014	0.727536	0.886694	1
REACTOME_PHASE_II_CONJUGATION	27	0.816614	0.727794	0.89055	1
REACTOME_SIGNALING_BY_NOTCH1	45	0.814951	0.811448	0.883316	1
REACTOME_CELL_DEATH_SIGNALLING_VIA_NRAGE_NRIF_AND_NADE	49	0.809455	0.816265	0.882702	1
REACTOME_FORMATION_OF_THE_HIV1_EARLY_ELONGATION_COMPLEX	15	0.807332	0.69146	0.876446	1
REACTOME_IRON_UPTAKE_AND_TRANSPORT	17	0.788743	0.755208	0.896962	1
REACTOME_TRANSCRIPTIONAL_ACTIVITY_OF_SMAD2_SMAD3_SMAD4_HETEROTRIMER	26	0.783546	0.795977	0.895348	1
REACTOME_S_PHASE	63	0.7751	0.892473	0.898002	1
REACTOME_SIGNALING_BY_FGFR_MUTANTS	28	0.761367	0.822674	0.908269	1
REACTOME_ABC_FAMILY_PROTEINS_MEDIATED_TRANSPORT	18	0.753443	0.820359	0.909197	1
REACTOME_MRNA_SPLICING_MINOR_PATHWAY	18	0.701513	0.861257	0.958065	1
REACTOME_REGULATION_OF_APOPTOSIS	32	0.682249	0.940055	0.964518	1
REACTOME_CHONDROITIN_SULFATE_DERMATAN_SULFATE_METABOLISM	22	0.657327	0.929155	0.972974	1
REACTOME_GROWTH_HORMONE_RECEPTOR_SIGNALING	17	0.623512	0.929619	0.981997	1
REACTOME_SULFUR_AMINO_ACID_METABOLISM	18	0.596894	0.9375	0.983551	1
REACTOME_NOTCH1_INTRACELLULAR_DOMAIN_REGULATES_TRANSCRIPTION	26	0.408535	1	0.99948	1

## Sheet: GSEA_KEGG_CW6_up
NAME	SIZE	NES	NOM p-val	FDR q-val	FWER p-val
KEGG_PYRIMIDINE_METABOLISM	66	2.18999	0	0.00180894	0.002
KEGG_NUCLEOTIDE_EXCISION_REPAIR	29	2.00369	0	0.0140498	0.029
KEGG_BASE_EXCISION_REPAIR	27	1.93569	0	0.0181578	0.058
KEGG_PURINE_METABOLISM	109	1.81345	0	0.0383609	0.157
KEGG_DNA_REPLICATION	27	1.79568	0.00573066	0.0369013	0.184
KEGG_PROPANOATE_METABOLISM	18	1.77537	0.0136986	0.0363758	0.215
KEGG_ARACHIDONIC_ACID_METABOLISM	22	1.66673	0.0220994	0.0699088	0.422
KEGG_PRIMARY_IMMUNODEFICIENCY	20	1.5211	0.0497238	0.158388	0.752
KEGG_BASAL_CELL_CARCINOMA	43	1.51421	0.0120482	0.147463	0.772
KEGG_NEUROACTIVE_LIGAND_RECEPTOR_INTERACTION	143	1.50129	0.00952381	0.142689	0.796
KEGG_PYRUVATE_METABOLISM	23	1.45483	0.0619469	0.171927	0.886
KEGG_CYTOKINE_CYTOKINE_RECEPTOR_INTERACTION	89	1.45394	0.0253165	0.158608	0.888
KEGG_HEMATOPOIETIC_CELL_LINEAGE	31	1.43298	0.0606061	0.163874	0.914
KEGG_GLYCEROLIPID_METABOLISM	31	1.39701	0.0617647	0.185306	0.95
KEGG_VIRAL_MYOCARDITIS	33	1.35055	0.0869565	0.225095	0.977
KEGG_GLUTATHIONE_METABOLISM	33	1.27373	0.121951	0.317562	0.996
KEGG_TYROSINE_METABOLISM	18	1.27012	0.15896	0.303921	0.997
KEGG_GLYCOLYSIS_GLUCONEOGENESIS	29	1.25206	0.139881	0.314535	0.997
KEGG_DRUG_METABOLISM_CYTOCHROME_P450	20	1.22	0.219949	0.352075	0.998
KEGG_VALINE_LEUCINE_AND_ISOLEUCINE_DEGRADATION	27	1.20491	0.177843	0.359821	0.999
KEGG_ECM_RECEPTOR_INTERACTION	58	1.18611	0.178694	0.373751	0.999
KEGG_RNA_POLYMERASE	17	1.18149	0.209115	0.363922	1
KEGG_ARGININE_AND_PROLINE_METABOLISM	36	1.16785	0.210843	0.372785	1
KEGG_METABOLISM_OF_XENOBIOTICS_BY_CYTOCHROME_P450	19	1.16361	0.266846	0.364611	1
KEGG_BUTANOATE_METABOLISM	19	1.09364	0.330645	0.480497	1
KEGG_FATTY_ACID_METABOLISM	25	1.08504	0.301676	0.480153	1
KEGG_NATURAL_KILLER_CELL_MEDIATED_CYTOTOXICITY	58	1.05339	0.366102	0.530371	1
KEGG_NOTCH_SIGNALING_PATHWAY	29	1.03793	0.409341	0.545288	1
KEGG_HOMOLOGOUS_RECOMBINATION	16	1.03782	0.385042	0.526639	1
KEGG_DRUG_METABOLISM_OTHER_ENZYMES	15	1.00026	0.447222	0.590048	1
KEGG_TGF_BETA_SIGNALING_PATHWAY	58	0.996201	0.47099	0.580651	1
KEGG_TRYPTOPHAN_METABOLISM	22	0.985927	0.453804	0.584578	1
KEGG_CELL_ADHESION_MOLECULES_CAMS	71	0.966303	0.542017	0.609618	1
KEGG_JAK_STAT_SIGNALING_PATHWAY	77	0.959811	0.501707	0.605792	1
KEGG_HISTIDINE_METABOLISM	17	0.955744	0.493298	0.597638	1
KEGG_ALDOSTERONE_REGULATED_SODIUM_REABSORPTION	29	0.914486	0.57726	0.66629	1
KEGG_HEDGEHOG_SIGNALING_PATHWAY	43	0.878234	0.687097	0.721668	1
KEGG_PENTOSE_PHOSPHATE_PATHWAY	15	0.771038	0.736181	0.888983	1
KEGG_INOSITOL_PHOSPHATE_METABOLISM	36	0.675026	0.930435	0.966786	1
KEGG_N_GLYCAN_BIOSYNTHESIS	30	0.491431	1	0.99705	1

## Sheet: GSEA_Reactome_CM6_down
NAME	SIZE	NES	NOM p-val	FDR q-val	FWER p-val
REACTOME_REGULATION_OF_ORNITHINE_DECARBOXYLASE_ODC	25	-2.02046	0	0.0327496	0.03
REACTOME_AUTODEGRADATION_OF_THE_E3_UBIQUITIN_LIGASE_COP1	23	-1.95483	0.00150376	0.0449843	0.074
REACTOME_APC_C_CDC20_MEDIATED_DEGRADATION_OF_MITOTIC_PROTEINS	35	-1.90404	0	0.0530105	0.132
REACTOME_AUTODEGRADATION_OF_CDH1_BY_CDH1_APC_C	30	-1.86346	0.00148588	0.0688431	0.226
REACTOME_APC_C_CDH1_MEDIATED_DEGRADATION_OF_CDC20_AND_OTHER_APC_C_CDH1_TARGETED_PROTEINS_IN_LATE_MITOSIS_EARLY_G1	35	-1.85556	0.00143472	0.05969	0.239
REACTOME_CDT1_ASSOCIATION_WITH_THE_CDC6_ORC_ORIGIN_COMPLEX	24	-1.84569	0.00149925	0.0553929	0.26
REACTOME_P53_DEPENDENT_G1_DNA_DAMAGE_RESPONSE	28	-1.84075	0.00292398	0.0506251	0.274
REACTOME_M_G1_TRANSITION	40	-1.8336	0.00143472	0.0486848	0.294
REACTOME_CDK_MEDIATED_PHOSPHORYLATION_AND_REMOVAL_OF_CDC6	21	-1.8329	0.00308642	0.0436303	0.297
REACTOME_DESTABILIZATION_OF_MRNA_BY_AUF1_HNRNP_D0	26	-1.82003	0	0.0459677	0.342
REACTOME_REGULATION_OF_MITOTIC_CELL_CYCLE	41	-1.81401	0	0.0452832	0.361
REACTOME_MITOTIC_G1_G1_S_PHASES	72	-1.78343	0	0.0589419	0.472
REACTOME_SCF_BETA_TRCP_MEDIATED_DEGRADATION_OF_EMI1	25	-1.77847	0.00595238	0.0574412	0.491
REACTOME_ASSEMBLY_OF_THE_PRE_REPLICATIVE_COMPLEX	31	-1.77761	0.00441176	0.0536504	0.492
REACTOME_TRANS_GOLGI_NETWORK_VESICLE_BUDDING	42	-1.77386	0.00141643	0.0521347	0.51
REACTOME_CELL_CYCLE_CHECKPOINTS	62	-1.77312	0.0013624	0.0490082	0.51
REACTOME_GOLGI_ASSOCIATED_VESICLE_BIOGENESIS	38	-1.76819	0.00146628	0.0483419	0.519
REACTOME_CYCLIN_E_ASSOCIATED_EVENTS_DURING_G1_S_TRANSITION_	35	-1.76188	0.00285714	0.0489708	0.539
REACTOME_P53_INDEPENDENT_G1_S_DNA_DAMAGE_CHECKPOINT	25	-1.75966	0.00734214	0.0473915	0.55
REACTOME_ORC1_REMOVAL_FROM_CHROMATIN	32	-1.75599	0.0014881	0.0468843	0.565
REACTOME_MITOTIC_M_M_G1_PHASES	90	-1.75445	0	0.045233	0.572
REACTOME_CELL_CYCLE_MITOTIC	179	-1.75364	0	0.0433759	0.573
REACTOME_APOPTOSIS	88	-1.7498	0	0.0434543	0.59
REACTOME_ACTIVATION_OF_NF_KAPPAB_IN_B_CELLS	33	-1.74209	0.00146843	0.0445931	0.614
REACTOME_DOWNSTREAM_SIGNALING_EVENTS_OF_B_CELL_RECEPTOR_BCR	53	-1.74078	0	0.0432477	0.618
REACTOME_LYSOSOME_VESICLE_BIOGENESIS	16	-1.72009	0.00911854	0.0519562	0.692
REACTOME_SCFSKP2_MEDIATED_DEGRADATION_OF_P27_P21	28	-1.71812	0.00584795	0.050882	0.7
REACTOME_G1_S_TRANSITION	57	-1.71402	0.00139276	0.0507526	0.717
REACTOME_DNA_REPLICATION	103	-1.7134	0.00124378	0.0495268	0.723
REACTOME_SYNTHESIS_OF_DNA	49	-1.70384	0.00559441	0.0523911	0.76
REACTOME_CELL_CYCLE	209	-1.70193	0	0.0520055	0.77
REACTOME_ER_PHAGOSOME_PATHWAY	27	-1.70156	0.00738552	0.050517	0.771
REACTOME_MAPK_TARGETS_NUCLEAR_EVENTS_MEDIATED_BY_MAP_KINASES	27	-1.69144	0.015015	0.0543728	0.805
REACTOME_DOWNSTREAM_TCR_SIGNALING	19	-1.67788	0.0134529	0.059896	0.842
REACTOME_S_PHASE	63	-1.67236	0.00673854	0.0607457	0.853
REACTOME_VIF_MEDIATED_DEGRADATION_OF_APOBEC3G	24	-1.66486	0.00755287	0.0631752	0.864
REACTOME_MRNA_3_END_PROCESSING	18	-1.65779	0.0177706	0.0656406	0.888
REACTOME_MEMBRANE_TRAFFICKING	73	-1.65063	0.00387597	0.0678489	0.908
REACTOME_CROSS_PRESENTATION_OF_SOLUBLE_EXOGENOUS_ANTIGENS_ENDOSOMES	23	-1.64743	0.0163447	0.0681043	0.916
REACTOME_APOPTOTIC_EXECUTION_PHASE	38	-1.64177	0.0158501	0.0696841	0.93
REACTOME_CLEAVAGE_OF_GROWING_TRANSCRIPT_IN_THE_TERMINATION_REGION_	23	-1.62754	0.0091047	0.0767371	0.946
REACTOME_MAP_KINASE_ACTIVATION_IN_TLR_CASCADE	37	-1.62525	0.0215517	0.0763975	0.946
REACTOME_ANTIGEN_PROCESSING_CROSS_PRESENTATION	34	-1.61567	0.0135135	0.0813877	0.96
REACTOME_METABOLISM_OF_PROTEINS	208	-1.60237	0	0.0890838	0.975
REACTOME_REGULATION_OF_MRNA_STABILITY_BY_PROTEINS_THAT_BIND_AU_RICH_ELEMENTS	47	-1.59891	0.0155367	0.0896221	0.977
REACTOME_ANTIVIRAL_MECHANISM_BY_IFN_STIMULATED_GENES	45	-1.57641	0.0142653	0.105644	0.994
REACTOME_TRAF6_MEDIATED_INDUCTION_OF_NFKB_AND_MAP_KINASES_UPON_TLR7_8_OR_9_ACTIVATION	50	-1.56618	0.0153417	0.112319	0.997
REACTOME_CLASS_I_MHC_MEDIATED_ANTIGEN_PROCESSING_PRESENTATION	150	-1.55322	0.00116959	0.122936	0.998
REACTOME_SIGNALING_BY_WNT	34	-1.54786	0.0278184	0.125616	0.998
REACTOME_REGULATION_OF_APOPTOSIS	32	-1.54368	0.017316	0.127363	0.998
REACTOME_ANTIGEN_PROCESSING_UBIQUITINATION_PROTEASOME_DEGRADATION	133	-1.54168	0.00246305	0.126907	0.998
REACTOME_LIGAND_GATED_ION_CHANNEL_TRANSPORT	16	-1.53417	0.0490046	0.131847	0.999
REACTOME_TOLL_RECEPTOR_CASCADES	74	-1.51422	0.0157274	0.15225	0.999
REACTOME_UNFOLDED_PROTEIN_RESPONSE	49	-1.50087	0.0266854	0.165404	0.999
REACTOME_NFKB_AND_MAP_KINASES_ACTIVATION_MEDIATED_BY_TLR4_SIGNALING_REPERTOIRE	51	-1.50044	0.0292479	0.162853	0.999
REACTOME_TRIGLYCERIDE_BIOSYNTHESIS	25	-1.50013	0.0361991	0.160235	0.999
REACTOME_G1_PHASE	22	-1.4988	0.0492308	0.158917	0.999
REACTOME_ERK_MAPK_TARGETS	18	-1.49382	0.0487421	0.161979	0.999
REACTOME_MEIOSIS	40	-1.48733	0.0465793	0.167141	0.999
REACTOME_TCR_SIGNALING	33	-1.48612	0.0361795	0.165658	0.999
REACTOME_RECYCLING_PATHWAY_OF_L1	21	-1.48517	0.050536	0.164307	0.999
REACTOME_TRIF_MEDIATED_TLR3_SIGNALING	50	-1.48214	0.0375	0.165275	1
REACTOME_SIGNAL_TRANSDUCTION_BY_L1	31	-1.48162	0.0457227	0.163351	1
REACTOME_MYD88_MAL_CASCADE_INITIATED_ON_PLASMA_MEMBRANE	56	-1.47131	0.03125	0.173839	1
REACTOME_NUCLEAR_EVENTS_KINASE_AND_TRANSCRIPTION_FACTOR_ACTIVATION	21	-1.46821	0.0505952	0.175093	1
REACTOME_SIGNALING_BY_THE_B_CELL_RECEPTOR_BCR	76	-1.46116	0.0308725	0.18178	1
REACTOME_REGULATION_OF_SIGNALING_BY_CBL	16	-1.46092	0.0643713	0.17949	1
REACTOME_TELOMERE_MAINTENANCE	25	-1.4602	0.0593472	0.177861	1
REACTOME_DIABETES_PATHWAYS	78	-1.45969	0.0284238	0.17586	1
REACTOME_INNATE_IMMUNE_SYSTEM	122	-1.45729	0.0145808	0.176281	1
REACTOME_HOST_INTERACTIONS_OF_HIV_FACTORS	76	-1.45403	0.030888	0.177595	1
REACTOME_ACTIVATION_OF_CHAPERONE_GENES_BY_XBP1S	30	-1.45125	0.0484115	0.178789	1
REACTOME_RNA_POL_I_TRANSCRIPTION	18	-1.44693	0.0615385	0.181626	1
REACTOME_NGF_SIGNALLING_VIA_TRKA_FROM_THE_PLASMA_MEMBRANE	105	-1.43745	0.0327044	0.190892	1
REACTOME_POST_TRANSLATIONAL_PROTEIN_MODIFICATION	89	-1.43684	0.0241423	0.189079	1
REACTOME_CHROMOSOME_MAINTENANCE	52	-1.43566	0.0443213	0.188147	1
REACTOME_MEIOTIC_RECOMBINATION	21	-1.43096	0.0525526	0.19215	1
REACTOME_METABOLISM_OF_VITAMINS_AND_COFACTORS	38	-1.4258	0.0532959	0.196105	1
REACTOME_DEPOSITION_OF_NEW_CENPA_CONTAINING_NUCLEOSOMES_AT_THE_CENTROMERE	15	-1.42425	0.062701	0.195476	1
REACTOME_ADAPTIVE_IMMUNE_SYSTEM	317	-1.42389	0.00431035	0.193496	1
REACTOME_SIGNALING_BY_ERBB4	58	-1.421	0.0507545	0.194815	1
REACTOME_GABA_SYNTHESIS_RELEASE_REUPTAKE_AND_DEGRADATION	16	-1.41725	0.0897833	0.197648	1
REACTOME_MHC_CLASS_II_ANTIGEN_PRESENTATION	50	-1.41516	0.0428571	0.197383	1
REACTOME_TRANSCRIPTION	92	-1.41227	0.0468354	0.199163	1
REACTOME_ACTIVATED_TLR4_SIGNALLING	62	-1.40209	0.0668449	0.210863	1
REACTOME_INSULIN_RECEPTOR_SIGNALLING_CASCADE	54	-1.39937	0.0473613	0.212133	1
REACTOME_METAL_ION_SLC_TRANSPORTERS	16	-1.39687	0.103448	0.213418	1
REACTOME_SRP_DEPENDENT_COTRANSLATIONAL_PROTEIN_TARGETING_TO_MEMBRANE	51	-1.3953	0.0577717	0.213089	1
REACTOME_MRNA_PROCESSING	78	-1.39401	0.0466667	0.212164	1
REACTOME_TRANSLATION	68	-1.39319	0.051114	0.210835	1
REACTOME_SIGNALING_BY_HIPPO	18	-1.37993	0.104524	0.226948	1
REACTOME_PROTEIN_FOLDING	28	-1.37756	0.0994152	0.22779	1
REACTOME_PI3K_AKT_ACTIVATION	24	-1.37144	0.0972018	0.234163	1
REACTOME_NEUROTRANSMITTER_RELEASE_CYCLE	32	-1.37136	0.0962644	0.231799	1
REACTOME_CYTOKINE_SIGNALING_IN_IMMUNE_SYSTEM	155	-1.36731	0.0288809	0.23516	1
REACTOME_IL_3_5_AND_GM_CSF_SIGNALING	29	-1.36165	0.0882353	0.241279	1
REACTOME_NEGATIVE_REGULATORS_OF_RIG_I_MDA5_SIGNALING	17	-1.3556	0.102009	0.24829	1
REACTOME_PI3K_CASCADE	41	-1.35504	0.0847701	0.246719	1
REACTOME_METABOLISM_OF_RNA	136	-1.35363	0.0342385	0.246564	1
REACTOME_METABOLISM_OF_MRNA	111	-1.35158	0.0477356	0.247114	1
REACTOME_INTRINSIC_PATHWAY_FOR_APOPTOSIS	20	-1.34894	0.117284	0.248375	1
REACTOME_DARPP_32_EVENTS	19	-1.34857	0.117647	0.246693	1
REACTOME_DOUBLE_STRAND_BREAK_REPAIR	15	-1.34736	0.0983103	0.246028	1
REACTOME_PKB_MEDIATED_EVENTS	18	-1.3402	0.119769	0.25398	1
REACTOME_MITOTIC_PROMETAPHASE	48	-1.33356	0.0831025	0.261663	1
REACTOME_RIG_I_MDA5_MEDIATED_INDUCTION_OF_IFN_ALPHA_BETA_PATHWAYS	35	-1.32448	0.106082	0.273032	1
REACTOME_RESPIRATORY_ELECTRON_TRANSPORT_ATP_SYNTHESIS_BY_CHEMIOSMOTIC_COUPLING_AND_HEAT_PRODUCTION_BY_UNCOUPLING_PROTEINS_	30	-1.32334	0.113043	0.272429	1
REACTOME_ASPARAGINE_N_LINKED_GLYCOSYLATION	48	-1.32213	0.104336	0.271691	1
REACTOME_TCA_CYCLE_AND_RESPIRATORY_ELECTRON_TRANSPORT	52	-1.31787	0.107143	0.276381	1
REACTOME_RNA_POL_I_RNA_POL_III_AND_MITOCHONDRIAL_TRANSCRIPTION	40	-1.31564	0.107242	0.277721	1
REACTOME_MITOCHONDRIAL_PROTEIN_IMPORT	26	-1.31428	0.138931	0.277219	1
REACTOME_MEIOTIC_SYNAPSIS	25	-1.30973	0.137725	0.282	1
REACTOME_ION_CHANNEL_TRANSPORT	37	-1.30295	0.110145	0.290706	1
REACTOME_SIGNALING_BY_INSULIN_RECEPTOR	64	-1.29899	0.105125	0.294651	1
REACTOME_METABOLISM_OF_CARBOHYDRATES	128	-1.29748	0.0648715	0.294699	1
REACTOME_RESPIRATORY_ELECTRON_TRANSPORT	24	-1.29644	0.150077	0.293621	1
REACTOME_PI_METABOLISM	33	-1.29611	0.143064	0.291689	1
REACTOME_SIGNALING_BY_EGFR_IN_CANCER	78	-1.28661	0.103723	0.305702	1
REACTOME_O_LINKED_GLYCOSYLATION_OF_MUCINS	22	-1.28614	0.150221	0.303907	1
REACTOME_PURINE_METABOLISM	26	-1.28536	0.142857	0.30269	1
REACTOME_SIGNALING_BY_FGFR	72	-1.27786	0.110115	0.313019	1
REACTOME_GABA_RECEPTOR_ACTIVATION	44	-1.27717	0.146515	0.311682	1
REACTOME_SIGNALING_BY_ILS	71	-1.27352	0.126138	0.315589	1
REACTOME_NUCLEOTIDE_BINDING_DOMAIN_LEUCINE_RICH_REPEAT_CONTAINING_RECEPTOR_NLR_SIGNALING_PATHWAYS	26	-1.27273	0.172662	0.314445	1
REACTOME_GLYCEROPHOSPHOLIPID_BIOSYNTHESIS	46	-1.2697	0.127572	0.317103	1
REACTOME_RNA_POL_II_TRANSCRIPTION	56	-1.26794	0.126685	0.317686	1
REACTOME_TRANSPORT_OF_RIBONUCLEOPROTEINS_INTO_THE_HOST_NUCLEUS	20	-1.25627	0.185535	0.335405	1
REACTOME_SIGNALLING_BY_NGF	171	-1.25182	0.0838253	0.340848	1
REACTOME_CD28_DEPENDENT_PI3K_AKT_SIGNALING	15	-1.25023	0.198748	0.341202	1
REACTOME_ENOS_ACTIVATION_AND_REGULATION	17	-1.24914	0.177196	0.34046	1
REACTOME_LOSS_OF_NLP_FROM_MITOTIC_CENTROSOMES	34	-1.24839	0.15896	0.339032	1
REACTOME_HIV_INFECTION	122	-1.23463	0.117291	0.361713	1
REACTOME_PI_3K_CASCADE	32	-1.23358	0.180473	0.360971	1
REACTOME_HS_GAG_BIOSYNTHESIS	19	-1.23239	0.175719	0.360535	1
REACTOME_PHOSPHOLIPID_METABOLISM	111	-1.2258	0.130545	0.370614	1
REACTOME_DOWNSTREAM_SIGNALING_OF_ACTIVATED_FGFR	67	-1.2231	0.163102	0.372776	1
REACTOME_DOWNSTREAM_SIGNAL_TRANSDUCTION	71	-1.21786	0.154354	0.379822	1
REACTOME_PIP3_ACTIVATES_AKT_SIGNALING	17	-1.2163	0.2	0.380028	1
REACTOME_PI3K_EVENTS_IN_ERBB4_SIGNALING	23	-1.21492	0.21142	0.379811	1
REACTOME_NEGATIVE_REGULATION_OF_FGFR_SIGNALING	19	-1.21345	0.203101	0.37985	1
REACTOME_METABOLISM_OF_AMINO_ACIDS_AND_DERIVATIVES	106	-1.21241	0.149567	0.379079	1
REACTOME_TRANSMISSION_ACROSS_CHEMICAL_SYNAPSES	156	-1.2115	0.121718	0.378053	1
REACTOME_PROCESSING_OF_CAPPED_INTRON_CONTAINING_PRE_MRNA	69	-1.21022	0.178667	0.37771	1
REACTOME_METABOLISM_OF_NUCLEOTIDES	50	-1.20519	0.207598	0.3846	1
REACTOME_GROWTH_HORMONE_RECEPTOR_SIGNALING	17	-1.20055	0.230769	0.390266	1
REACTOME_MRNA_SPLICING	48	-1.1948	0.207934	0.398452	1
REACTOME_METABOLISM_OF_NON_CODING_RNA	27	-1.19421	0.216794	0.396713	1
REACTOME_CD28_CO_STIMULATION	21	-1.19144	0.234104	0.398939	1
REACTOME_TRAF6_MEDIATED_NFKB_ACTIVATION	15	-1.18907	0.257098	0.400569	1
REACTOME_KERATAN_SULFATE_BIOSYNTHESIS	16	-1.18702	0.261905	0.402275	1
REACTOME_INFLUENZA_LIFE_CYCLE	71	-1.18271	0.202957	0.407992	1
REACTOME_3_UTR_MEDIATED_TRANSLATIONAL_REGULATION	42	-1.18114	0.21295	0.408309	1
REACTOME_EXTENSION_OF_TELOMERES	17	-1.17952	0.247392	0.408737	1
REACTOME_INTERFERON_SIGNALING	85	-1.17256	0.178205	0.419399	1
REACTOME_GAB1_SIGNALOSOME	24	-1.16826	0.254839	0.42492	1
REACTOME_RNA_POL_III_TRANSCRIPTION_INITIATION_FROM_TYPE_3_PROMOTER	15	-1.1666	0.263407	0.425265	1
REACTOME_PYRUVATE_METABOLISM_AND_CITRIC_ACID_TCA_CYCLE	23	-1.16031	0.272446	0.434603	1
REACTOME_SIGNALING_BY_ROBO_RECEPTOR	25	-1.15746	0.271186	0.437459	1
REACTOME_SHC_MEDIATED_CASCADE	16	-1.15275	0.294028	0.443877	1
REACTOME_NEURONAL_SYSTEM	218	-1.15147	0.192609	0.44373	1
REACTOME_TRANSPORT_OF_MATURE_TRANSCRIPT_TO_CYTOPLASM	33	-1.15072	0.256798	0.442499	1
REACTOME_LAGGING_STRAND_SYNTHESIS	15	-1.14999	0.287037	0.441142	1
REACTOME_ASSOCIATION_OF_TRIC_CCT_WITH_TARGET_PROTEINS_DURING_BIOSYNTHESIS	18	-1.14875	0.264753	0.440904	1
REACTOME_MITOTIC_G2_G2_M_PHASES	48	-1.14512	0.260989	0.445204	1
REACTOME_DEADENYLATION_DEPENDENT_MRNA_DECAY	25	-1.14326	0.276827	0.446279	1
REACTOME_SIGNALING_BY_BMP	16	-1.1361	0.2912	0.458321	1
REACTOME_SIGNALING_BY_SCF_KIT	51	-1.13504	0.258904	0.45764	1
REACTOME_ACTIVATION_OF_THE_PRE_REPLICATIVE_COMPLEX	16	-1.12673	0.334891	0.471744	1
REACTOME_REGULATION_OF_INSULIN_SECRETION	64	-1.12486	0.255376	0.472915	1
REACTOME_THE_ROLE_OF_NEF_IN_HIV1_REPLICATION_AND_DISEASE_PATHOGENESIS	20	-1.12447	0.297972	0.470934	1
REACTOME_RECRUITMENT_OF_MITOTIC_CENTROSOME_PROTEINS_AND_COMPLEXES	38	-1.12163	0.275321	0.474072	1
REACTOME_PI3K_EVENTS_IN_ERBB2_SIGNALING	27	-1.12157	0.318386	0.471439	1
REACTOME_G2_M_CHECKPOINTS	22	-1.1208	0.306452	0.470315	1
REACTOME_GLYCOSAMINOGLYCAN_METABOLISM	56	-1.11972	0.257294	0.469669	1
REACTOME_PHOSPHOLIPASE_C_MEDIATED_CASCADE	37	-1.11866	0.322443	0.469111	1
REACTOME_TRANSPORT_TO_THE_GOLGI_AND_SUBSEQUENT_MODIFICATION	23	-1.11517	0.309524	0.473401	1
REACTOME_SIGNALING_BY_FGFR_IN_DISEASE	83	-1.11461	0.272843	0.471971	1
REACTOME_POST_NMDA_RECEPTOR_ACTIVATION_EVENTS	30	-1.11427	0.308042	0.470084	1
REACTOME_KERATAN_SULFATE_KERATIN_METABOLISM	18	-1.10115	0.33945	0.49355	1
REACTOME_SIGNALING_BY_ERBB2	70	-1.09785	0.30291	0.497624	1
REACTOME_TIGHT_JUNCTION_INTERACTIONS	16	-1.0912	0.335394	0.508739	1
REACTOME_FACTORS_INVOLVED_IN_MEGAKARYOCYTE_DEVELOPMENT_AND_PLATELET_PRODUCTION	63	-1.09017	0.321871	0.508061	1
REACTOME_CELL_DEATH_SIGNALLING_VIA_NRAGE_NRIF_AND_NADE	49	-1.08822	0.337535	0.509347	1
REACTOME_ACTIVATION_OF_THE_MRNA_UPON_BINDING_OF_THE_CAP_BINDING_COMPLEX_AND_EIFS_AND_SUBSEQUENT_BINDING_TO_43S	24	-1.08605	0.349486	0.510601	1
REACTOME_SIGNAL_AMPLIFICATION	24	-1.0849	0.325723	0.510074	1
REACTOME_APOPTOTIC_CLEAVAGE_OF_CELLULAR_PROTEINS	30	-1.08464	0.334808	0.507771	1
REACTOME_GLUCOSE_TRANSPORT	25	-1.08131	0.369565	0.512201	1
REACTOME_HEPARAN_SULFATE_HEPARIN_HS_GAG_METABOLISM	30	-1.0809	0.353712	0.510413	1
REACTOME_L1CAM_INTERACTIONS	58	-1.07792	0.339947	0.513746	1
REACTOME_NUCLEAR_RECEPTOR_TRANSCRIPTION_PATHWAY	31	-1.07251	0.35493	0.522104	1
REACTOME_TRNA_AMINOACYLATION	16	-1.07043	0.373609	0.523574	1
REACTOME_NOD1_2_SIGNALING_PATHWAY	18	-1.06456	0.397196	0.533029	1
REACTOME_ACTIVATION_OF_NMDA_RECEPTOR_UPON_GLUTAMATE_BINDING_AND_POSTSYNAPTIC_EVENTS	34	-1.06034	0.378066	0.538804	1
REACTOME_NEPHRIN_INTERACTIONS	15	-1.05891	0.398754	0.538937	1
REACTOME_CELL_CELL_JUNCTION_ORGANIZATION	35	-1.05561	0.385989	0.542818	1
REACTOME_FRS2_MEDIATED_CASCADE	21	-1.04402	0.429864	0.563332	1
REACTOME_EGFR_DOWNREGULATION	17	-1.04335	0.401515	0.561849	1
REACTOME_DNA_STRAND_ELONGATION	21	-1.04283	0.402077	0.559902	1
REACTOME_TRANSCRIPTIONAL_REGULATION_OF_WHITE_ADIPOCYTE_DIFFERENTIATION	31	-1.0414	0.414562	0.560043	1
REACTOME_NEUROTRANSMITTER_RECEPTOR_BINDING_AND_DOWNSTREAM_TRANSMISSION_IN_THE_POSTSYNAPTIC_CELL	109	-1.0344	0.397094	0.571396	1
REACTOME_RNA_POL_III_TRANSCRIPTION	20	-1.03383	0.403904	0.569599	1
REACTOME_TRANSPORT_OF_GLUCOSE_AND_OTHER_SUGARS_BILE_SALTS_AND_ORGANIC_ACIDS_METAL_IONS_AND_AMINE_COMPOUNDS	53	-1.03191	0.395062	0.570825	1
REACTOME_PEPTIDE_CHAIN_ELONGATION	36	-1.03067	0.421583	0.570701	1
REACTOME_SIGNALING_BY_FGFR_MUTANTS	28	-1.02589	0.414286	0.577614	1
REACTOME_NUCLEAR_SIGNALING_BY_ERBB4	25	-1.01852	0.43876	0.589858	1
REACTOME_METABOLISM_OF_LIPIDS_AND_LIPOPROTEINS	256	-1.0155	0.442825	0.59315	1
REACTOME_TRANSPORT_OF_MATURE_MRNA_DERIVED_FROM_AN_INTRONLESS_TRANSCRIPT	23	-1.01486	0.4414	0.591743	1
REACTOME_IL1_SIGNALING	23	-1.00964	0.442368	0.599497	1
REACTOME_CELL_CELL_COMMUNICATION	84	-1.00439	0.457474	0.607193	1
REACTOME_G_BETA_GAMMA_SIGNALLING_THROUGH_PI3KGAMMA	20	-0.993201	0.475758	0.627055	1
REACTOME_CIRCADIAN_CLOCK	36	-0.990992	0.467422	0.62823	1
REACTOME_SYNTHESIS_OF_PIPS_AT_THE_PLASMA_MEMBRANE	21	-0.990985	0.447289	0.625277	1
REACTOME_SIGNALING_BY_PDGF	95	-0.99016	0.489227	0.624036	1
REACTOME_ACTIVATION_OF_ATR_IN_RESPONSE_TO_REPLICATION_STRESS	18	-0.989464	0.478331	0.622598	1
REACTOME_INTEGRATION_OF_ENERGY_METABOLISM	82	-0.982912	0.478655	0.633004	1
REACTOME_AQUAPORIN_MEDIATED_TRANSPORT	36	-0.980197	0.508798	0.635304	1
REACTOME_CHOLESTEROL_BIOSYNTHESIS	17	-0.978085	0.484326	0.636709	1
REACTOME_TRANSCRIPTIONAL_ACTIVITY_OF_SMAD2_SMAD3_SMAD4_HETEROTRIMER	26	-0.977464	0.512409	0.635009	1
REACTOME_COSTIMULATION_BY_THE_CD28_FAMILY	32	-0.977056	0.501441	0.632988	1
REACTOME_REGULATION_OF_INSULIN_SECRETION_BY_GLUCAGON_LIKE_PEPTIDE1	35	-0.974104	0.496474	0.636486	1
REACTOME_GLOBAL_GENOMIC_NER_GG_NER	21	-0.972782	0.508076	0.636406	1
REACTOME_NRAGE_SIGNALS_DEATH_THROUGH_JNK	37	-0.969951	0.502128	0.639359	1
REACTOME_NONSENSE_MEDIATED_DECAY_ENHANCED_BY_THE_EXON_JUNCTION_COMPLEX	48	-0.962473	0.510029	0.65174	1
REACTOME_REGULATION_OF_WATER_BALANCE_BY_RENAL_AQUAPORINS	34	-0.951135	0.524286	0.671182	1
REACTOME_GPVI_MEDIATED_ACTIVATION_CASCADE	25	-0.950632	0.525836	0.669085	1
REACTOME_TRANSMEMBRANE_TRANSPORT_OF_SMALL_MOLECULES	255	-0.931972	0.640135	0.702991	1
REACTOME_ADP_SIGNALLING_THROUGH_P2RY1	19	-0.923827	0.568282	0.716368	1
REACTOME_TRANSCRIPTION_COUPLED_NER_TC_NER	29	-0.923115	0.577485	0.714587	1
REACTOME_REGULATION_OF_GLUCOKINASE_BY_GLUCOKINASE_REGULATORY_PROTEIN	18	-0.918521	0.588146	0.720754	1
REACTOME_CA_DEPENDENT_EVENTS	25	-0.917254	0.592431	0.720001	1
REACTOME_NEP_NS2_INTERACTS_WITH_THE_CELLULAR_EXPORT_MACHINERY	20	-0.903481	0.621329	0.743859	1
REACTOME_G_PROTEIN_BETA_GAMMA_SIGNALLING	22	-0.90088	0.605055	0.745773	1
REACTOME_FATTY_ACID_TRIACYLGLYCEROL_AND_KETONE_BODY_METABOLISM	95	-0.895021	0.654457	0.754376	1
REACTOME_DEVELOPMENTAL_BIOLOGY	257	-0.889064	0.733333	0.762579	1
REACTOME_SLC_MEDIATED_TRANSMEMBRANE_TRANSPORT	151	-0.881651	0.724428	0.773466	1
REACTOME_SIGNALLING_TO_ERKS	27	-0.87921	0.654709	0.774633	1
REACTOME_IL_2_SIGNALING	27	-0.877741	0.668622	0.774205	1
REACTOME_ADHERENS_JUNCTIONS_INTERACTIONS	19	-0.876155	0.656299	0.773915	1
REACTOME_N_GLYCAN_ANTENNAE_ELONGATION_IN_THE_MEDIAL_TRANS_GOLGI	15	-0.876086	0.648855	0.770845	1
REACTOME_AMYLOIDS	18	-0.870803	0.631579	0.777457	1
REACTOME_LATE_PHASE_OF_HIV_LIFE_CYCLE	63	-0.864395	0.705479	0.786376	1
REACTOME_SEMAPHORIN_INTERACTIONS	53	-0.862891	0.690278	0.785913	1
REACTOME_CREB_PHOSPHORYLATION_THROUGH_THE_ACTIVATION_OF_RAS	24	-0.860222	0.669129	0.787526	1
REACTOME_HEMOSTASIS	274	-0.857401	0.813901	0.789335	1
REACTOME_DOWNREGULATION_OF_TGF_BETA_RECEPTOR_SIGNALING	15	-0.840914	0.67638	0.816076	1
REACTOME_PLC_BETA_MEDIATED_EVENTS	35	-0.840564	0.710084	0.813347	1
REACTOME_INTERACTIONS_OF_VPR_WITH_HOST_CELLULAR_PROTEINS	23	-0.834527	0.701515	0.820439	1
REACTOME_RESPONSE_TO_ELEVATED_PLATELET_CYTOSOLIC_CA2_	46	-0.816031	0.758669	0.848791	1
REACTOME_DAG_AND_IP3_SIGNALING	26	-0.814844	0.730496	0.847388	1
REACTOME_IL_RECEPTOR_SHC_SIGNALING	17	-0.809796	0.733038	0.852487	1
REACTOME_CHONDROITIN_SULFATE_DERMATAN_SULFATE_METABOLISM	22	-0.795354	0.741248	0.872734	1
REACTOME_P75_NTR_RECEPTOR_MEDIATED_SIGNALLING	64	-0.794767	0.804138	0.87017	1
REACTOME_GLUCONEOGENESIS	16	-0.791075	0.752427	0.872467	1
REACTOME_SIGNALLING_TO_RAS	21	-0.785194	0.774096	0.878372	1
REACTOME_TGF_BETA_RECEPTOR_SIGNALING_ACTIVATES_SMADS	18	-0.777925	0.775701	0.886215	1
REACTOME_SIGNALING_BY_NOTCH1	45	-0.774511	0.819103	0.887689	1
REACTOME_SIGNALING_BY_TGF_BETA_RECEPTOR_COMPLEX	45	-0.768024	0.822222	0.893795	1
REACTOME_OPIOID_SIGNALLING	62	-0.761924	0.842457	0.899128	1
REACTOME_INFLUENZA_VIRAL_RNA_TRANSCRIPTION_AND_REPLICATION	45	-0.733169	0.872777	0.932946	1
REACTOME_FORMATION_OF_THE_TERNARY_COMPLEX_AND_SUBSEQUENTLY_THE_43S_COMPLEX	19	-0.718558	0.863988	0.946299	1
REACTOME_NOTCH1_INTRACELLULAR_DOMAIN_REGULATES_TRANSCRIPTION	26	-0.710115	0.878561	0.952025	1
REACTOME_GENERIC_TRANSCRIPTION_PATHWAY	84	-0.708342	0.937028	0.950313	1
REACTOME_ACTIVATED_NOTCH1_TRANSMITS_SIGNAL_TO_THE_NUCLEUS	19	-0.705406	0.847724	0.949859	1
REACTOME_GLUCOSE_METABOLISM	39	-0.70098	0.899433	0.950647	1
REACTOME_SPHINGOLIPID_METABOLISM	33	-0.699427	0.902017	0.948579	1
REACTOME_STRIATED_MUSCLE_CONTRACTION	17	-0.698789	0.866995	0.94561	1
REACTOME_HIV_LIFE_CYCLE	75	-0.691911	0.957784	0.948855	1
REACTOME_SIGNALING_BY_RHO_GTPASES	80	-0.675253	0.970667	0.959545	1
REACTOME_IRON_UPTAKE_AND_TRANSPORT	17	-0.659759	0.914463	0.96815	1
REACTOME_G_ALPHA1213_SIGNALLING_EVENTS	60	-0.653999	0.9747	0.968639	1
REACTOME_NETRIN1_SIGNALING	31	-0.63967	0.944361	0.97433	1
REACTOME_THROMBIN_SIGNALLING_THROUGH_PROTEINASE_ACTIVATED_RECEPTORS_PARS	22	-0.630805	0.94152	0.976077	1
REACTOME_THROMBOXANE_SIGNALLING_THROUGH_TP_RECEPTOR	17	-0.628149	0.932308	0.973928	1
REACTOME_INHIBITION_OF_VOLTAGE_GATED_CA2_CHANNELS_VIA_GBETA_GAMMA_SUBUNITS	20	-0.621837	0.948092	0.973724	1
REACTOME_SMAD2_SMAD3_SMAD4_HETEROTRIMER_REGULATES_TRANSCRIPTION	17	-0.605822	0.929134	0.977885	1
REACTOME_PERK_REGULATED_GENE_EXPRESSION	15	-0.570786	0.959752	0.987294	1
REACTOME_ADP_SIGNALLING_THROUGH_P2RY12	18	-0.447134	0.995246	1	1
REACTOME_PLATELET_HOMEOSTASIS	54	-0.417133	1	0.999174	1

## Sheet: GSEA_KEGG_CM6_down
NAME	SIZE	NES	NOM p-val	FDR q-val	FWER p-val
KEGG_PARKINSONS_DISEASE	53	-2.09392	0	0.00198301	0.002
KEGG_PROTEASOME	20	-1.8598	0.00454545	0.0563185	0.101
KEGG_SNARE_INTERACTIONS_IN_VESICULAR_TRANSPORT	24	-1.8429	0.00152207	0.0440147	0.118
KEGG_MTOR_SIGNALING_PATHWAY	38	-1.67227	0.00699301	0.191084	0.522
KEGG_PANCREATIC_CANCER	58	-1.65194	0.00691563	0.184783	0.584
KEGG_BLADDER_CANCER	30	-1.60823	0.017991	0.228603	0.723
KEGG_MAPK_SIGNALING_PATHWAY	198	-1.56363	0.00352526	0.279241	0.845
KEGG_ALANINE_ASPARTATE_AND_GLUTAMATE_METABOLISM	22	-1.5356	0.0403587	0.303942	0.903
KEGG_ETHER_LIPID_METABOLISM	19	-1.52193	0.0515464	0.302635	0.919
KEGG_ENDOMETRIAL_CANCER	41	-1.49364	0.0321168	0.337549	0.958
KEGG_UBIQUITIN_MEDIATED_PROTEOLYSIS	96	-1.49113	0.0100251	0.31247	0.958
KEGG_PROGESTERONE_MEDIATED_OOCYTE_MATURATION	66	-1.48867	0.0184941	0.291357	0.96
KEGG_PROSTATE_CANCER	69	-1.46586	0.0237781	0.317671	0.976
KEGG_NEUROTROPHIN_SIGNALING_PATHWAY	102	-1.4648	0.0154242	0.297736	0.978
KEGG_PENTOSE_PHOSPHATE_PATHWAY	15	-1.45974	0.0530421	0.288199	0.98
KEGG_NOD_LIKE_RECEPTOR_SIGNALING_PATHWAY	30	-1.45557	0.0466102	0.278003	0.981
KEGG_APOPTOSIS	50	-1.45113	0.0272851	0.269241	0.985
KEGG_FC_EPSILON_RI_SIGNALING_PATHWAY	55	-1.44921	0.0417266	0.257445	0.986
KEGG_INSULIN_SIGNALING_PATHWAY	103	-1.43345	0.029525	0.274329	0.994
KEGG_COLORECTAL_CANCER	53	-1.41027	0.0468966	0.308494	0.996
KEGG_P53_SIGNALING_PATHWAY	44	-1.40349	0.0491132	0.306623	0.997
KEGG_VIBRIO_CHOLERAE_INFECTION	32	-1.39383	0.0816327	0.313746	0.997
KEGG_T_CELL_RECEPTOR_SIGNALING_PATHWAY	75	-1.38096	0.0461538	0.325924	0.997
KEGG_PATHOGENIC_ESCHERICHIA_COLI_INFECTION	37	-1.36885	0.0878962	0.337852	0.997
KEGG_OXIDATIVE_PHOSPHORYLATION	47	-1.36423	0.0798319	0.334617	0.998
KEGG_TOLL_LIKE_RECEPTOR_SIGNALING_PATHWAY	56	-1.36293	0.0811189	0.324477	0.998
KEGG_VEGF_SIGNALING_PATHWAY	48	-1.36263	0.0705219	0.312982	0.998
KEGG_GLYCOSPHINGOLIPID_BIOSYNTHESIS_LACTO_AND_NEOLACTO_SERIES	15	-1.36257	0.110592	0.301998	0.998
KEGG_LYSOSOME	76	-1.33505	0.0849673	0.346577	1
KEGG_LONG_TERM_DEPRESSION	51	-1.33039	0.108033	0.342967	1
KEGG_SPLICEOSOME	57	-1.32468	0.0861373	0.343595	1
KEGG_JAK_STAT_SIGNALING_PATHWAY	77	-1.32443	0.0725191	0.333449	1
KEGG_CHRONIC_MYELOID_LEUKEMIA	63	-1.32128	0.101987	0.330006	1
KEGG_CELL_CYCLE	84	-1.32032	0.0862745	0.322002	1
KEGG_HOMOLOGOUS_RECOMBINATION	16	-1.30858	0.147866	0.335187	1
KEGG_RENAL_CELL_CARCINOMA	57	-1.29996	0.0943643	0.341156	1
KEGG_TIGHT_JUNCTION	83	-1.29898	0.0883838	0.333865	1
KEGG_RIG_I_LIKE_RECEPTOR_SIGNALING_PATHWAY	37	-1.29581	0.125541	0.33126	1
KEGG_ERBB_SIGNALING_PATHWAY	68	-1.27174	0.118421	0.371413	1
KEGG_GLYCEROPHOSPHOLIPID_METABOLISM	47	-1.26694	0.128415	0.372395	1
KEGG_FC_GAMMA_R_MEDIATED_PHAGOCYTOSIS	77	-1.24201	0.134877	0.416839	1
KEGG_GAP_JUNCTION	57	-1.2396	0.15651	0.41258	1
KEGG_GLYCOSAMINOGLYCAN_BIOSYNTHESIS_HEPARAN_SULFATE	17	-1.2383	0.199067	0.405125	1
KEGG_ENDOCYTOSIS	114	-1.23388	0.111386	0.405629	1
KEGG_MELANOMA	52	-1.20798	0.173025	0.453261	1
KEGG_ARACHIDONIC_ACID_METABOLISM	22	-1.18843	0.216049	0.489706	1
KEGG_PRION_DISEASES	22	-1.17846	0.246933	0.50225	1
KEGG_SMALL_CELL_LUNG_CANCER	68	-1.17267	0.208279	0.507465	1
KEGG_NON_SMALL_CELL_LUNG_CANCER	42	-1.16036	0.260331	0.526433	1
KEGG_EPITHELIAL_CELL_SIGNALING_IN_HELICOBACTER_PYLORI_INFECTION	43	-1.14831	0.248957	0.546247	1
KEGG_ADIPOCYTOKINE_SIGNALING_PATHWAY	51	-1.12423	0.270345	0.596664	1
KEGG_TGF_BETA_SIGNALING_PATHWAY	58	-1.10509	0.288591	0.636827	1
KEGG_PATHWAYS_IN_CANCER	238	-1.10344	0.235754	0.628715	1
KEGG_GLYCINE_SERINE_AND_THREONINE_METABOLISM	18	-1.08887	0.342814	0.656283	1
KEGG_ANTIGEN_PROCESSING_AND_PRESENTATION	27	-1.08225	0.370206	0.661744	1
KEGG_NUCLEOTIDE_EXCISION_REPAIR	29	-1.08186	0.343567	0.65096	1
KEGG_CHEMOKINE_SIGNALING_PATHWAY	116	-1.06926	0.324224	0.673164	1
KEGG_N_GLYCAN_BIOSYNTHESIS	30	-1.06722	0.379161	0.666724	1
KEGG_GALACTOSE_METABOLISM	16	-1.06391	0.375587	0.663759	1
KEGG_LONG_TERM_POTENTIATION	55	-1.06251	0.374294	0.656596	1
KEGG_GLIOMA	52	-1.05358	0.381148	0.669174	1
KEGG_RNA_DEGRADATION	32	-1.05059	0.369118	0.666387	1
KEGG_OOCYTE_MEIOSIS	76	-1.03853	0.414414	0.68726	1
KEGG_ALZHEIMERS_DISEASE	85	-1.03748	0.397622	0.679099	1
KEGG_VASOPRESSIN_REGULATED_WATER_REABSORPTION	31	-1.02474	0.431851	0.701154	1
KEGG_RIBOSOME	37	-1.02468	0.427526	0.690609	1
KEGG_THYROID_CANCER	24	-1.02459	0.425339	0.680459	1
KEGG_ADHERENS_JUNCTION	60	-1.02098	0.425352	0.679634	1
KEGG_LEUKOCYTE_TRANSENDOTHELIAL_MIGRATION	78	-1.01798	0.418605	0.677342	1
KEGG_ARRHYTHMOGENIC_RIGHT_VENTRICULAR_CARDIOMYOPATHY_ARVC	55	-1.00865	0.443995	0.689365	1
KEGG_FOCAL_ADHESION	150	-0.996228	0.474676	0.708685	1
KEGG_AMINO_SUGAR_AND_NUCLEOTIDE_SUGAR_METABOLISM	29	-0.983885	0.486765	0.728028	1
KEGG_ARGININE_AND_PROLINE_METABOLISM	36	-0.981776	0.50295	0.723512	1
KEGG_B_CELL_RECEPTOR_SIGNALING_PATHWAY	57	-0.969308	0.5	0.742197	1
KEGG_AXON_GUIDANCE	108	-0.965768	0.536285	0.74011	1
KEGG_WNT_SIGNALING_PATHWAY	109	-0.963304	0.542351	0.736062	1
KEGG_O_GLYCAN_BIOSYNTHESIS	16	-0.951228	0.561051	0.753004	1
KEGG_HEDGEHOG_SIGNALING_PATHWAY	43	-0.949466	0.547486	0.747478	1
KEGG_CYTOSOLIC_DNA_SENSING_PATHWAY	23	-0.946117	0.533937	0.74585	1
KEGG_MISMATCH_REPAIR	17	-0.943261	0.551447	0.742611	1
KEGG_ACUTE_MYELOID_LEUKEMIA	47	-0.941892	0.556017	0.736102	1
KEGG_GNRH_SIGNALING_PATHWAY	71	-0.940226	0.570681	0.730826	1
KEGG_REGULATION_OF_ACTIN_CYTOSKELETON	153	-0.911326	0.635308	0.785067	1
KEGG_NICOTINATE_AND_NICOTINAMIDE_METABOLISM	15	-0.90271	0.608764	0.794016	1
KEGG_TYPE_II_DIABETES_MELLITUS	34	-0.899811	0.610795	0.790338	1
KEGG_CYSTEINE_AND_METHIONINE_METABOLISM	21	-0.888714	0.627393	0.802841	1
KEGG_PHOSPHATIDYLINOSITOL_SIGNALING_SYSTEM	55	-0.877282	0.652174	0.817693	1
KEGG_SPHINGOLIPID_METABOLISM	23	-0.87499	0.629349	0.812554	1
KEGG_NEUROACTIVE_LIGAND_RECEPTOR_INTERACTION	143	-0.872312	0.7491	0.808749	1
KEGG_DNA_REPLICATION	27	-0.867033	0.642029	0.810145	1
KEGG_LEISHMANIA_INFECTION	34	-0.85509	0.690883	0.824224	1
KEGG_AMYOTROPHIC_LATERAL_SCLEROSIS_ALS	36	-0.840161	0.703911	0.842588	1
KEGG_LYSINE_DEGRADATION	34	-0.834067	0.70365	0.844817	1
KEGG_FRUCTOSE_AND_MANNOSE_METABOLISM	21	-0.821289	0.727134	0.857863	1
KEGG_CYTOKINE_CYTOKINE_RECEPTOR_INTERACTION	89	-0.812875	0.797954	0.862754	1
KEGG_CARDIAC_MUSCLE_CONTRACTION	46	-0.81149	0.770515	0.856166	1
KEGG_VIRAL_MYOCARDITIS	33	-0.799394	0.784343	0.866805	1
KEGG_NATURAL_KILLER_CELL_MEDIATED_CYTOTOXICITY	58	-0.797815	0.8	0.860565	1
KEGG_HYPERTROPHIC_CARDIOMYOPATHY_HCM	61	-0.784189	0.800539	0.873826	1
KEGG_TRYPTOPHAN_METABOLISM	22	-0.782811	0.754304	0.867187	1
KEGG_HUNTINGTONS_DISEASE	86	-0.778868	0.847309	0.864495	1
KEGG_PYRIMIDINE_METABOLISM	66	-0.759872	0.863271	0.883196	1
KEGG_STARCH_AND_SUCROSE_METABOLISM	18	-0.741946	0.81677	0.898166	1
KEGG_INOSITOL_PHOSPHATE_METABOLISM	36	-0.681407	0.925072	0.953958	1
KEGG_GLUTATHIONE_METABOLISM	33	-0.551729	0.989826	1	1
KEGG_DRUG_METABOLISM_CYTOCHROME_P450	20	-0.509285	0.990698	1	1
KEGG_COMPLEMENT_AND_COAGULATION_CASCADES	24	-0.460851	0.998483	0.998154	1

## Sheet: GSEA_Reactome_CM6_up
NAME	SIZE	NES	NOM p-val	FDR q-val	FWER p-val
REACTOME_EXTRACELLULAR_MATRIX_ORGANIZATION	53	1.88893	0	0.158974	0.19
REACTOME_COLLAGEN_FORMATION	43	1.87683	0.00322581	0.0847263	0.202
REACTOME_BASIGIN_INTERACTIONS	17	1.85676	0.00275482	0.064877	0.225
REACTOME_REGULATORY_RNA_PATHWAYS	18	1.61255	0.0234987	0.342092	0.868
REACTOME_MICRORNA_MIRNA_BIOGENESIS	15	1.48119	0.0623306	0.644253	0.992
REACTOME_TRANSPORT_OF_VITAMINS_NUCLEOSIDES_AND_RELATED_MOLECULES	19	1.45308	0.0699708	0.640361	0.999
REACTOME_NCAM1_INTERACTIONS	31	1.36923	0.0840841	0.905734	1
REACTOME_EFFECTS_OF_PIP2_HYDROLYSIS	19	1.36586	0.0906433	0.805263	1
REACTOME_LIPOPROTEIN_METABOLISM	15	1.3372	0.128141	0.842027	1
REACTOME_INHIBITION_OF_INSULIN_SECRETION_BY_ADRENALINE_NORADRENALINE	22	1.32724	0.11747	0.800855	1
REACTOME_SMOOTH_MUSCLE_CONTRACTION	17	1.31386	0.111437	0.782414	1
REACTOME_ABC_FAMILY_PROTEINS_MEDIATED_TRANSPORT	18	1.29632	0.169492	0.788461	1
REACTOME_MRNA_SPLICING_MINOR_PATHWAY	18	1.27531	0.170604	0.811414	1
REACTOME_AMINO_ACID_TRANSPORT_ACROSS_THE_PLASMA_MEMBRANE	19	1.24627	0.18806	0.878219	1
REACTOME_GPCR_LIGAND_BINDING	178	1.22956	0.0402685	0.893093	1
REACTOME_SIGNALING_BY_FGFR1_MUTANTS	18	1.19635	0.21021	0.98623	1
REACTOME_FORMATION_OF_THE_HIV1_EARLY_ELONGATION_COMPLEX	15	1.17993	0.242507	1	1
REACTOME_NCAM_SIGNALING_FOR_NEURITE_OUT_GROWTH	45	1.17811	0.187713	0.955062	1
REACTOME_G_ALPHA_I_SIGNALLING_EVENTS	90	1.15767	0.184332	0.999792	1
REACTOME_G_ALPHA_Z_SIGNALLING_EVENTS	37	1.15613	0.24024	0.956486	1
REACTOME_CLASS_A1_RHODOPSIN_LIKE_RECEPTORS	115	1.15368	0.159341	0.921329	1
REACTOME_AMINE_LIGAND_BINDING_RECEPTORS	20	1.14925	0.252688	0.900207	1
REACTOME_G_ALPHA_Q_SIGNALLING_EVENTS	99	1.14884	0.165803	0.862641	1
REACTOME_AMINE_COMPOUND_SLC_TRANSPORTERS	16	1.14505	0.266289	0.841112	1
REACTOME_RAS_ACTIVATION_UOPN_CA2_INFUX_THROUGH_NMDA_RECEPTOR	15	1.14247	0.258486	0.817963	1
REACTOME_AMINO_ACID_AND_OLIGOPEPTIDE_SLC_TRANSPORTERS	31	1.12866	0.252492	0.839692	1
REACTOME_G_ALPHA_S_SIGNALLING_EVENTS	65	1.1246	0.247826	0.824207	1
REACTOME_NITRIC_OXIDE_STIMULATES_GUANYLATE_CYCLASE	16	1.11057	0.298246	0.845824	1
REACTOME_TRAFFICKING_OF_AMPA_RECEPTORS	21	1.08904	0.309735	0.899632	1
REACTOME_ELONGATION_ARREST_AND_RECOVERY	20	1.0883	0.304598	0.872002	1
REACTOME_IMMUNOREGULATORY_INTERACTIONS_BETWEEN_A_LYMPHOID_AND_A_NON_LYMPHOID_CELL	24	1.08557	0.350877	0.854447	1
REACTOME_GASTRIN_CREB_SIGNALLING_PATHWAY_VIA_PKC_AND_MAPK	116	1.08137	0.256684	0.843227	1
REACTOME_LIPID_DIGESTION_MOBILIZATION_AND_TRANSPORT	26	1.07911	0.335329	0.826167	1
REACTOME_G_BETA_GAMMA_SIGNALLING_THROUGH_PLC_BETA	16	1.07882	0.344538	0.802973	1
REACTOME_BASE_EXCISION_REPAIR	16	1.07007	0.352113	0.808317	1
REACTOME_DNA_REPAIR	66	1.06732	0.310484	0.795836	1
REACTOME_CELL_JUNCTION_ORGANIZATION	51	1.06527	0.317073	0.780799	1
REACTOME_RNA_POL_II_TRANSCRIPTION_PRE_INITIATION_AND_PROMOTER_OPENING	19	1.06238	0.356125	0.769911	1
REACTOME_PRE_NOTCH_EXPRESSION_AND_PROCESSING	29	1.05591	0.39172	0.771161	1
REACTOME_ANTIGEN_ACTIVATES_B_CELL_RECEPTOR_LEADING_TO_GENERATION_OF_SECOND_MESSENGERS	23	1.0483	0.415385	0.776327	1
REACTOME_GPCR_DOWNSTREAM_SIGNALING	250	1.04041	0.274725	0.782613	1
REACTOME_PRE_NOTCH_TRANSCRIPTION_AND_TRANSLATION	19	1.0303	0.420613	0.79613	1
REACTOME_PLATELET_ACTIVATION_SIGNALING_AND_AGGREGATION	138	1.0282	0.32948	0.7843	1
REACTOME_ACTIVATION_OF_KAINATE_RECEPTORS_UPON_GLUTAMATE_BINDING	24	1.02352	0.409222	0.780318	1
REACTOME_AXON_GUIDANCE	189	1.00673	0.444444	0.81697	1
REACTOME_PEPTIDE_LIGAND_BINDING_RECEPTORS	74	1.0052	0.417062	0.804246	1
REACTOME_NUCLEOTIDE_EXCISION_REPAIR	32	1.00281	0.448052	0.79439	1
REACTOME_FORMATION_OF_TRANSCRIPTION_COUPLED_NER_TC_NER_REPAIR_COMPLEX	16	0.991933	0.460916	0.811364	1
REACTOME_SIGNALING_BY_GPCR	323	0.990081	0.542373	0.800802	1
REACTOME_PPARA_ACTIVATES_GENE_EXPRESSION	54	0.975974	0.510204	0.827	1
REACTOME_VOLTAGE_GATED_POTASSIUM_CHANNELS	34	0.974566	0.508671	0.815162	1
REACTOME_PLATELET_AGGREGATION_PLUG_FORMATION	26	0.974349	0.509677	0.800071	1
REACTOME_INTERFERON_ALPHA_BETA_SIGNALING	25	0.973666	0.493671	0.787086	1
REACTOME_POTASSIUM_CHANNELS	73	0.963009	0.56087	0.802936	1
REACTOME_TRANSPORT_OF_INORGANIC_CATIONS_ANIONS_AND_AMINO_ACIDS_OLIGOPEPTIDES	59	0.960796	0.51626	0.794157	1
REACTOME_GABA_B_RECEPTOR_ACTIVATION	31	0.960536	0.526984	0.780941	1
REACTOME_FORMATION_OF_RNA_POL_II_ELONGATION_COMPLEX_	24	0.946243	0.528875	0.805546	1
REACTOME_MYOGENESIS	18	0.939487	0.53562	0.810378	1
REACTOME_CELL_SURFACE_INTERACTIONS_AT_THE_VASCULAR_WALL	54	0.928697	0.586716	0.825652	1
REACTOME_INWARDLY_RECTIFYING_K_CHANNELS	24	0.919755	0.60241	0.835254	1
REACTOME_INTEGRIN_CELL_SURFACE_INTERACTIONS	59	0.915589	0.610039	0.832518	1
REACTOME_SEMA4D_INDUCED_CELL_MIGRATION_AND_GROWTH_CONE_COLLAPSE	18	0.910256	0.604972	0.832619	1
REACTOME_SEMA4D_IN_SEMAPHORIN_SIGNALING	20	0.905797	0.587156	0.831136	1
REACTOME_GLUCAGON_SIGNALING_IN_METABOLIC_REGULATION	27	0.901327	0.63142	0.829765	1
REACTOME_SIGNALING_BY_NOTCH	70	0.889068	0.729358	0.846566	1
REACTOME_ION_TRANSPORT_BY_P_TYPE_ATPASES	21	0.878535	0.662461	0.858379	1
REACTOME_MUSCLE_CONTRACTION	30	0.87729	0.64557	0.848393	1
REACTOME_INTEGRIN_ALPHAIIB_BETA3_SIGNALING	21	0.862811	0.637143	0.867005	1
REACTOME_RNA_POL_II_PRE_TRANSCRIPTION_EVENTS	32	0.798704	0.809061	0.982523	1
REACTOME_RORA_ACTIVATES_CIRCADIAN_EXPRESSION	16	0.785082	0.769029	0.991723	1
REACTOME_BMAL1_CLOCK_NPAS2_ACTIVATES_CIRCADIAN_EXPRESSION	25	0.776679	0.790419	0.991602	1
REACTOME_INTERFERON_GAMMA_SIGNALING	30	0.765008	0.840391	0.995003	1
REACTOME_CIRCADIAN_REPRESSION_OF_EXPRESSION_BY_REV_ERBA	15	0.763199	0.812339	0.983729	1
REACTOME_CLASS_B_2_SECRETIN_FAMILY_RECEPTORS	55	0.725265	0.961686	1	1
REACTOME_YAP1_AND_WWTR1_TAZ_STIMULATED_GENE_EXPRESSION	15	0.718568	0.856354	1	1
REACTOME_PROSTACYCLIN_SIGNALLING_THROUGH_PROSTACYCLIN_RECEPTOR	15	0.685046	0.904509	1	1
REACTOME_G_PROTEIN_ACTIVATION	21	0.649686	0.935028	1	1
REACTOME_LATENT_INFECTION_OF_HOMO_SAPIENS_WITH_MYCOBACTERIUM_TUBERCULOSIS	15	0.643249	0.940217	1	1
REACTOME_PHASE_II_CONJUGATION	27	0.637819	0.968116	1	1
REACTOME_SULFUR_AMINO_ACID_METABOLISM	18	0.61251	0.961853	1	1
REACTOME_PHASE1_FUNCTIONALIZATION_OF_COMPOUNDS	25	0.61124	0.982558	1	1
REACTOME_BIOLOGICAL_OXIDATIONS	52	0.599865	0.988636	0.999851	1
REACTOME_GLYCOSPHINGOLIPID_METABOLISM	21	0.589447	0.975078	0.991035	1
REACTOME_GLUCAGON_TYPE_LIGAND_RECEPTORS	21	0.572166	0.953079	0.983714	1

## Sheet: GSEA_KEGG_CM6_up
NAME	SIZE	NES	NOM p-val	FDR q-val	FWER p-val
KEGG_HEMATOPOIETIC_CELL_LINEAGE	31	1.92179	0	0.0398258	0.047
KEGG_BASE_EXCISION_REPAIR	27	1.60382	0.0151976	0.248883	0.463
KEGG_ECM_RECEPTOR_INTERACTION	58	1.42116	0.0267176	0.55604	0.882
KEGG_INTESTINAL_IMMUNE_NETWORK_FOR_IGA_PRODUCTION	15	1.41285	0.0861111	0.439379	0.894
KEGG_PRIMARY_IMMUNODEFICIENCY	20	1.30889	0.12766	0.66077	0.986
KEGG_PROPANOATE_METABOLISM	18	1.25231	0.158046	0.752621	0.998
KEGG_ALDOSTERONE_REGULATED_SODIUM_REABSORPTION	29	1.24053	0.154605	0.685869	0.999
KEGG_RNA_POLYMERASE	17	1.21985	0.217391	0.669205	0.999
KEGG_TASTE_TRANSDUCTION	19	1.15529	0.226708	0.835948	1
KEGG_CELL_ADHESION_MOLECULES_CAMS	71	1.13257	0.189394	0.839423	1
KEGG_HISTIDINE_METABOLISM	17	1.0996	0.301333	0.888871	1
KEGG_NOTCH_SIGNALING_PATHWAY	29	1.08297	0.327922	0.88231	1
KEGG_VASCULAR_SMOOTH_MUSCLE_CONTRACTION	77	1.04079	0.378261	0.985451	1
KEGG_PURINE_METABOLISM	109	1.03339	0.366667	0.943952	1
KEGG_GLYCEROLIPID_METABOLISM	31	1.02395	0.429936	0.918991	1
KEGG_ABC_TRANSPORTERS	26	0.991062	0.449568	0.987558	1
KEGG_GLYCOLYSIS_GLUCONEOGENESIS	29	0.974347	0.4875	0.992319	1
KEGG_FATTY_ACID_METABOLISM	25	0.967062	0.509434	0.963927	1
KEGG_MELANOGENESIS	68	0.933611	0.608	1	1
KEGG_VALINE_LEUCINE_AND_ISOLEUCINE_DEGRADATION	27	0.928386	0.569659	0.99712	1
KEGG_BUTANOATE_METABOLISM	19	0.918176	0.594752	0.980916	1
KEGG_PYRUVATE_METABOLISM	23	0.913206	0.572755	0.950536	1
KEGG_REGULATION_OF_AUTOPHAGY	17	0.907982	0.579096	0.924531	1
KEGG_TYROSINE_METABOLISM	18	0.904041	0.582386	0.896669	1
KEGG_PPAR_SIGNALING_PATHWAY	35	0.883924	0.643333	0.91377	1
KEGG_DILATED_CARDIOMYOPATHY	67	0.874387	0.743697	0.903821	1
KEGG_OLFACTORY_TRANSDUCTION	19	0.86706	0.688	0.886019	1
KEGG_DORSO_VENTRAL_AXIS_FORMATION	17	0.8546	0.668555	0.882748	1
KEGG_CALCIUM_SIGNALING_PATHWAY	121	0.844849	0.81383	0.874081	1
KEGG_BASAL_CELL_CARCINOMA	43	0.769312	0.888525	0.976571	1
KEGG_SYSTEMIC_LUPUS_ERYTHEMATOSUS	31	0.709723	0.885093	1	1
KEGG_METABOLISM_OF_XENOBIOTICS_BY_CYTOCHROME_P450	19	0.690937	0.878187	0.997975	1
KEGG_DRUG_METABOLISM_OTHER_ENZYMES	15	0.659048	0.909794	0.987601	1
KEGG_PEROXISOME	43	0.638921	0.979094	0.967863	1

## Sheet: GSEA_Reactome_CM18_down
NAME	SIZE	NES	NOM p-val	FDR q-val	FWER p-val
REACTOME_RECYCLING_PATHWAY_OF_L1	21	-1.82838	0.0011236	0.0307261	0.029
REACTOME_SIGNAL_TRANSDUCTION_BY_L1	31	-1.77335	0	0.0490359	0.092
REACTOME_ANTIVIRAL_MECHANISM_BY_IFN_STIMULATED_GENES	45	-1.73336	0.00106952	0.0712244	0.187
REACTOME_EGFR_DOWNREGULATION	17	-1.72485	0.00233645	0.0628905	0.217
REACTOME_GABA_SYNTHESIS_RELEASE_REUPTAKE_AND_DEGRADATION	16	-1.68675	0.00239234	0.0992206	0.384
REACTOME_NEUROTRANSMITTER_RELEASE_CYCLE	32	-1.66249	0.00442478	0.120829	0.513
REACTOME_LIGAND_GATED_ION_CHANNEL_TRANSPORT	16	-1.61947	0.00829384	0.191616	0.731
REACTOME_LYSOSOME_VESICLE_BIOGENESIS	16	-1.60165	0.0105758	0.206768	0.802
REACTOME_SIGNALING_BY_ILS	71	-1.58387	0.00102354	0.231373	0.865
REACTOME_MAP_KINASE_ACTIVATION_IN_TLR_CASCADE	37	-1.57819	0.00537634	0.223183	0.878
REACTOME_ION_CHANNEL_TRANSPORT	37	-1.56828	0.0075594	0.230738	0.907
REACTOME_SIGNALING_BY_EGFR_IN_CANCER	78	-1.56738	0	0.213644	0.91
REACTOME_NGF_SIGNALLING_VIA_TRKA_FROM_THE_PLASMA_MEMBRANE	105	-1.55696	0	0.226995	0.94
REACTOME_IL_3_5_AND_GM_CSF_SIGNALING	29	-1.5565	0.00656455	0.212462	0.94
REACTOME_TRANSPORT_TO_THE_GOLGI_AND_SUBSEQUENT_MODIFICATION	23	-1.5535	0.0103567	0.204562	0.944
REACTOME_PI_METABOLISM	33	-1.54992	0.00853789	0.201798	0.948
REACTOME_REGULATION_OF_SIGNALING_BY_CBL	16	-1.54091	0.0225653	0.211162	0.964
REACTOME_PKB_MEDIATED_EVENTS	18	-1.53682	0.0188235	0.210641	0.97
REACTOME_GABA_RECEPTOR_ACTIVATION	44	-1.53109	0.00315789	0.213919	0.978
REACTOME_FORMATION_OF_RNA_POL_II_ELONGATION_COMPLEX_	24	-1.52852	0.0177384	0.209262	0.98
REACTOME_TRIGLYCERIDE_BIOSYNTHESIS	25	-1.52685	0.0222469	0.202994	0.981
REACTOME_PHOSPHOLIPID_METABOLISM	111	-1.52388	0	0.200401	0.984
REACTOME_GOLGI_ASSOCIATED_VESICLE_BIOGENESIS	38	-1.50938	0.0107066	0.225553	0.993
REACTOME_ERK_MAPK_TARGETS	18	-1.50713	0.0308571	0.221774	0.993
REACTOME_L1CAM_INTERACTIONS	58	-1.49644	0.00931677	0.241044	0.999
REACTOME_CD28_CO_STIMULATION	21	-1.49313	0.0264064	0.239824	0.999
REACTOME_SIGNALING_BY_FGFR_MUTANTS	28	-1.49266	0.0258427	0.232344	0.999
REACTOME_THROMBIN_SIGNALLING_THROUGH_PROTEINASE_ACTIVATED_RECEPTORS_PARS	22	-1.48647	0.0344432	0.238564	0.999
REACTOME_SIGNALING_BY_SCF_KIT	51	-1.48479	0.0177083	0.234701	0.999
REACTOME_TRANS_GOLGI_NETWORK_VESICLE_BUDDING	42	-1.48013	0.0244941	0.239485	0.999
REACTOME_GLYCEROPHOSPHOLIPID_BIOSYNTHESIS	46	-1.47835	0.01875	0.236378	0.999
REACTOME_GLYCOSPHINGOLIPID_METABOLISM	21	-1.47719	0.0347222	0.231446	0.999
REACTOME_INSULIN_RECEPTOR_SIGNALLING_CASCADE	54	-1.47283	0.00828157	0.234128	0.999
REACTOME_SIGNAL_AMPLIFICATION	24	-1.47117	0.0172414	0.231516	0.999
REACTOME_SIGNALING_BY_INSULIN_RECEPTOR	64	-1.46447	0.0113285	0.242147	1
REACTOME_SPHINGOLIPID_METABOLISM	33	-1.45905	0.0239651	0.249015	1
REACTOME_MHC_CLASS_II_ANTIGEN_PRESENTATION	50	-1.45139	0.0167364	0.262129	1
REACTOME_RNA_POL_I_TRANSCRIPTION	18	-1.44124	0.0570749	0.283067	1
REACTOME_GPVI_MEDIATED_ACTIVATION_CASCADE	25	-1.44087	0.0408627	0.277199	1
REACTOME_TRANSMISSION_ACROSS_CHEMICAL_SYNAPSES	156	-1.43904	0	0.274975	1
REACTOME_DOWNSTREAM_SIGNAL_TRANSDUCTION	71	-1.43801	0.0183486	0.270963	1
REACTOME_EFFECTS_OF_PIP2_HYDROLYSIS	19	-1.4375	0.0517039	0.266019	1
REACTOME_ELONGATION_ARREST_AND_RECOVERY	20	-1.43496	0.0488372	0.265981	1
REACTOME_ACTIVATION_OF_CHAPERONE_GENES_BY_XBP1S	30	-1.43388	0.0466667	0.262831	1
REACTOME_N_GLYCAN_ANTENNAE_ELONGATION_IN_THE_MEDIAL_TRANS_GOLGI	15	-1.432	0.0544794	0.2612	1
REACTOME_NEURONAL_SYSTEM	218	-1.43141	0	0.257233	1
REACTOME_CLASS_I_MHC_MEDIATED_ANTIGEN_PROCESSING_PRESENTATION	150	-1.43125	0.001002	0.252043	1
REACTOME_KERATAN_SULFATE_BIOSYNTHESIS	16	-1.42973	0.0399033	0.250045	1
REACTOME_CYTOKINE_SIGNALING_IN_IMMUNE_SYSTEM	155	-1.42785	0.001001	0.249304	1
REACTOME_SIGNALING_BY_FGFR	72	-1.42784	0.0101937	0.244318	1
REACTOME_RNA_POL_II_PRE_TRANSCRIPTION_EVENTS	32	-1.42533	0.0502732	0.245523	1
REACTOME_CD28_DEPENDENT_PI3K_AKT_SIGNALING	15	-1.42531	0.0606796	0.240841	1
REACTOME_RNA_POL_I_RNA_POL_III_AND_MITOCHONDRIAL_TRANSCRIPTION	40	-1.42527	0.0347734	0.236393	1
REACTOME_SIGNALING_BY_FGFR_IN_DISEASE	83	-1.42367	0.0121704	0.235385	1
REACTOME_TRAF6_MEDIATED_INDUCTION_OF_NFKB_AND_MAP_KINASES_UPON_TLR7_8_OR_9_ACTIVATION	50	-1.42195	0.0208986	0.234959	1
REACTOME_SIGNALLING_TO_ERKS	27	-1.42137	0.0575221	0.232112	1
REACTOME_POST_TRANSLATIONAL_PROTEIN_MODIFICATION	89	-1.41866	0.0111336	0.233378	1
REACTOME_NEGATIVE_REGULATORS_OF_RIG_I_MDA5_SIGNALING	17	-1.41778	0.0731707	0.231051	1
REACTOME_TRANSCRIPTION	92	-1.41536	0.00607287	0.232196	1
REACTOME_SIGNALING_BY_ERBB2	70	-1.41483	0.017418	0.2293	1
REACTOME_NUCLEAR_EVENTS_KINASE_AND_TRANSCRIPTION_FACTOR_ACTIVATION	21	-1.4112	0.0547945	0.232913	1
REACTOME_MAPK_TARGETS_NUCLEAR_EVENTS_MEDIATED_BY_MAP_KINASES	27	-1.40617	0.0481928	0.23971	1
REACTOME_TRANSPORT_OF_RIBONUCLEOPROTEINS_INTO_THE_HOST_NUCLEUS	20	-1.40366	0.0724138	0.241674	1
REACTOME_ANTIGEN_PROCESSING_UBIQUITINATION_PROTEASOME_DEGRADATION	133	-1.40255	0.00200803	0.2405	1
REACTOME_HIV_INFECTION	122	-1.40201	0.0100503	0.238013	1
REACTOME_O_LINKED_GLYCOSYLATION_OF_MUCINS	22	-1.40179	0.0647727	0.234952	1
REACTOME_CA_DEPENDENT_EVENTS	25	-1.40149	0.0474041	0.231949	1
REACTOME_MEMBRANE_TRAFFICKING	73	-1.40091	0.0193089	0.229664	1
REACTOME_REGULATION_OF_INSULIN_SECRETION	64	-1.39308	0.0265036	0.243262	1
REACTOME_G_BETA_GAMMA_SIGNALLING_THROUGH_PI3KGAMMA	20	-1.39235	0.0684455	0.241551	1
REACTOME_IL1_SIGNALING	23	-1.38823	0.0494382	0.246833	1
REACTOME_SIGNALING_BY_HIPPO	18	-1.38531	0.0706018	0.249752	1
REACTOME_NEUROTRANSMITTER_RECEPTOR_BINDING_AND_DOWNSTREAM_TRANSMISSION_IN_THE_POSTSYNAPTIC_CELL	109	-1.38376	0.0141414	0.249882	1
REACTOME_PLATELET_ACTIVATION_SIGNALING_AND_AGGREGATION	138	-1.3814	0.00704935	0.251656	1
REACTOME_THE_ROLE_OF_NEF_IN_HIV1_REPLICATION_AND_DISEASE_PATHOGENESIS	20	-1.38135	0.0741599	0.248328	1
REACTOME_DEADENYLATION_DEPENDENT_MRNA_DECAY	25	-1.38046	0.0680804	0.246875	1
REACTOME_HOST_INTERACTIONS_OF_HIV_FACTORS	76	-1.37897	0.0274112	0.247043	1
REACTOME_DOWNSTREAM_SIGNALING_OF_ACTIVATED_FGFR	67	-1.37729	0.0316327	0.247481	1
REACTOME_MYD88_MAL_CASCADE_INITIATED_ON_PLASMA_MEMBRANE	56	-1.37275	0.0465839	0.253788	1
REACTOME_SIGNALLING_TO_RAS	21	-1.372	0.0829546	0.252294	1
REACTOME_THROMBOXANE_SIGNALLING_THROUGH_TP_RECEPTOR	17	-1.3712	0.0854801	0.250946	1
REACTOME_ASSOCIATION_OF_TRIC_CCT_WITH_TARGET_PROTEINS_DURING_BIOSYNTHESIS	18	-1.36506	0.0942957	0.261705	1
REACTOME_FACTORS_INVOLVED_IN_MEGAKARYOCYTE_DEVELOPMENT_AND_PLATELET_PRODUCTION	63	-1.36252	0.0432544	0.264447	1
REACTOME_FORMATION_OF_THE_HIV1_EARLY_ELONGATION_COMPLEX	15	-1.35907	0.104116	0.269262	1
REACTOME_ASPARAGINE_N_LINKED_GLYCOSYLATION	48	-1.35864	0.0606061	0.267043	1
REACTOME_POST_NMDA_RECEPTOR_ACTIVATION_EVENTS	30	-1.35465	0.0723684	0.272289	1
REACTOME_GAB1_SIGNALOSOME	24	-1.34697	0.105145	0.286116	1
REACTOME_RNA_POL_II_TRANSCRIPTION	56	-1.34448	0.04617	0.288151	1
REACTOME_PI3K_CASCADE	41	-1.34444	0.0789755	0.284994	1
REACTOME_FORMATION_OF_TRANSCRIPTION_COUPLED_NER_TC_NER_REPAIR_COMPLEX	16	-1.3439	0.115055	0.282975	1
REACTOME_ADAPTIVE_IMMUNE_SYSTEM	317	-1.34377	0	0.280279	1
REACTOME_RNA_POL_III_TRANSCRIPTION	20	-1.34351	0.0863061	0.277853	1
REACTOME_HS_GAG_BIOSYNTHESIS	19	-1.34342	0.106236	0.275174	1
REACTOME_SIGNALLING_BY_NGF	171	-1.3433	0.009	0.272505	1
REACTOME_HEMOSTASIS	274	-1.34296	0.001001	0.270282	1
REACTOME_PROTEIN_FOLDING	28	-1.34283	0.0901099	0.267785	1
REACTOME_KERATAN_SULFATE_KERATIN_METABOLISM	18	-1.34155	0.104651	0.267817	1
REACTOME_LATE_PHASE_OF_HIV_LIFE_CYCLE	63	-1.34121	0.0446985	0.265971	1
REACTOME_GLYCOSAMINOGLYCAN_METABOLISM	56	-1.34068	0.049896	0.264379	1
REACTOME_INTEGRATION_OF_ENERGY_METABOLISM	82	-1.33997	0.038736	0.263124	1
REACTOME_G_PROTEIN_BETA_GAMMA_SIGNALLING	22	-1.33386	0.106774	0.273144	1
REACTOME_SIGNALING_BY_ERBB4	58	-1.33372	0.0554985	0.270737	1
REACTOME_FRS2_MEDIATED_CASCADE	21	-1.33268	0.104427	0.270292	1
REACTOME_GLUCONEOGENESIS	16	-1.33179	0.134977	0.269752	1
REACTOME_COSTIMULATION_BY_THE_CD28_FAMILY	32	-1.32989	0.107692	0.270893	1
REACTOME_GLUCAGON_SIGNALING_IN_METABOLIC_REGULATION	27	-1.32801	0.1	0.272155	1
REACTOME_RNA_POL_III_TRANSCRIPTION_INITIATION_FROM_TYPE_3_PROMOTER	15	-1.32734	0.111913	0.271035	1
REACTOME_INTERFERON_SIGNALING	85	-1.32539	0.040568	0.272366	1
REACTOME_IL_2_SIGNALING	27	-1.32537	0.110262	0.269914	1
REACTOME_TRAFFICKING_OF_AMPA_RECEPTORS	21	-1.32483	0.0976744	0.268591	1
REACTOME_DAG_AND_IP3_SIGNALING	26	-1.32337	0.119101	0.268988	1
REACTOME_ADP_SIGNALLING_THROUGH_P2RY1	19	-1.32107	0.10943	0.271354	1
REACTOME_APOPTOTIC_EXECUTION_PHASE	38	-1.31654	0.0925727	0.27838	1
REACTOME_METABOLISM_OF_VITAMINS_AND_COFACTORS	38	-1.30993	0.109442	0.29011	1
REACTOME_ACTIVATION_OF_NMDA_RECEPTOR_UPON_GLUTAMATE_BINDING_AND_POSTSYNAPTIC_EVENTS	34	-1.30517	0.104121	0.298061	1
REACTOME_METABOLISM_OF_CARBOHYDRATES	128	-1.30423	0.0321608	0.297297	1
REACTOME_NFKB_AND_MAP_KINASES_ACTIVATION_MEDIATED_BY_TLR4_SIGNALING_REPERTOIRE	51	-1.30231	0.100832	0.298815	1
REACTOME_HEPARAN_SULFATE_HEPARIN_HS_GAG_METABOLISM	30	-1.30034	0.112691	0.300223	1
REACTOME_TRANSCRIPTION_COUPLED_NER_TC_NER	29	-1.29738	0.121413	0.304225	1
REACTOME_METABOLISM_OF_PROTEINS	208	-1.29575	0.01001	0.305	1
REACTOME_VOLTAGE_GATED_POTASSIUM_CHANNELS	34	-1.28995	0.131004	0.315416	1
REACTOME_PHOSPHOLIPASE_C_MEDIATED_CASCADE	37	-1.28918	0.118662	0.314476	1
REACTOME_SYNTHESIS_OF_PIPS_AT_THE_PLASMA_MEMBRANE	21	-1.28398	0.160323	0.324061	1
REACTOME_SIGNALING_BY_ROBO_RECEPTOR	25	-1.27693	0.144605	0.337535	1
REACTOME_PLC_BETA_MEDIATED_EVENTS	35	-1.27525	0.125806	0.338875	1
REACTOME_INTEGRIN_ALPHAIIB_BETA3_SIGNALING	21	-1.27355	0.143513	0.339753	1
REACTOME_HIV_LIFE_CYCLE	75	-1.27169	0.0754332	0.341249	1
REACTOME_POTASSIUM_CHANNELS	73	-1.26953	0.0924797	0.343382	1
REACTOME_ACTIVATED_TLR4_SIGNALLING	62	-1.26734	0.112735	0.345696	1
REACTOME_TOLL_RECEPTOR_CASCADES	74	-1.26629	0.0894142	0.34562	1
REACTOME_METABOLISM_OF_NON_CODING_RNA	27	-1.26401	0.155405	0.348467	1
REACTOME_DARPP_32_EVENTS	19	-1.26286	0.140023	0.348601	1
REACTOME_PLATELET_AGGREGATION_PLUG_FORMATION	26	-1.26066	0.165919	0.351105	1
REACTOME_SEMAPHORIN_INTERACTIONS	53	-1.25745	0.132095	0.356458	1
REACTOME_METABOLISM_OF_LIPIDS_AND_LIPOPROTEINS	256	-1.25571	0.017	0.357476	1
REACTOME_TRIF_MEDIATED_TLR3_SIGNALING	50	-1.24928	0.146624	0.36988	1
REACTOME_UNFOLDED_PROTEIN_RESPONSE	49	-1.24815	0.131775	0.369743	1
REACTOME_DOWNREGULATION_OF_TGF_BETA_RECEPTOR_SIGNALING	15	-1.23908	0.193237	0.388865	1
REACTOME_PI3K_AKT_ACTIVATION	24	-1.23643	0.195011	0.39229	1
REACTOME_IL_RECEPTOR_SHC_SIGNALING	17	-1.23596	0.189158	0.390574	1
REACTOME_PI3K_EVENTS_IN_ERBB4_SIGNALING	23	-1.23218	0.193258	0.39712	1
REACTOME_LOSS_OF_NLP_FROM_MITOTIC_CENTROSOMES	34	-1.23191	0.169014	0.395049	1
REACTOME_SIGNALING_BY_BMP	16	-1.22968	0.2109	0.397652	1
REACTOME_PIP3_ACTIVATES_AKT_SIGNALING	17	-1.22802	0.202607	0.398968	1
REACTOME_NEGATIVE_REGULATION_OF_FGFR_SIGNALING	19	-1.2266	0.215385	0.399812	1
REACTOME_NUCLEOTIDE_EXCISION_REPAIR	32	-1.22336	0.17382	0.405145	1
REACTOME_SHC_MEDIATED_CASCADE	16	-1.22321	0.218676	0.402807	1
REACTOME_DEVELOPMENTAL_BIOLOGY	257	-1.22073	0.038	0.406125	1
REACTOME_G_ALPHA1213_SIGNALLING_EVENTS	60	-1.21786	0.168737	0.410132	1
REACTOME_AXON_GUIDANCE	189	-1.21566	0.05	0.412768	1
REACTOME_CREB_PHOSPHORYLATION_THROUGH_THE_ACTIVATION_OF_RAS	24	-1.2135	0.218962	0.415018	1
REACTOME_REGULATION_OF_INSULIN_SECRETION_BY_GLUCAGON_LIKE_PEPTIDE1	35	-1.21258	0.218045	0.414562	1
REACTOME_GLOBAL_GENOMIC_NER_GG_NER	21	-1.20536	0.23237	0.429917	1
REACTOME_ANTIGEN_ACTIVATES_B_CELL_RECEPTOR_LEADING_TO_GENERATION_OF_SECOND_MESSENGERS	23	-1.2023	0.207657	0.434686	1
REACTOME_MRNA_PROCESSING	78	-1.19983	0.166836	0.438194	1
REACTOME_CIRCADIAN_CLOCK	36	-1.19284	0.228355	0.453491	1
REACTOME_TGF_BETA_RECEPTOR_SIGNALING_ACTIVATES_SMADS	18	-1.1916	0.237187	0.453626	1
REACTOME_SULFUR_AMINO_ACID_METABOLISM	18	-1.19071	0.247664	0.452987	1
REACTOME_APOPTOSIS	88	-1.18848	0.176234	0.456103	1
REACTOME_SIGNALING_BY_FGFR1_MUTANTS	18	-1.1839	0.238489	0.465676	1
REACTOME_CELL_CELL_COMMUNICATION	84	-1.18153	0.179331	0.468954	1
REACTOME_INHIBITION_OF_VOLTAGE_GATED_CA2_CHANNELS_VIA_GBETA_GAMMA_SUBUNITS	20	-1.18093	0.265837	0.46755	1
REACTOME_RNA_POL_II_TRANSCRIPTION_PRE_INITIATION_AND_PROMOTER_OPENING	19	-1.17909	0.257042	0.469234	1
REACTOME_SIGNALING_BY_THE_B_CELL_RECEPTOR_BCR	76	-1.17896	0.175205	0.466709	1
REACTOME_GABA_B_RECEPTOR_ACTIVATION	31	-1.17229	0.26101	0.481551	1
REACTOME_DOWNSTREAM_SIGNALING_EVENTS_OF_B_CELL_RECEPTOR_BCR	53	-1.16869	0.223261	0.48774	1
REACTOME_INNATE_IMMUNE_SYSTEM	122	-1.16633	0.162298	0.49103	1
REACTOME_MITOTIC_G2_G2_M_PHASES	48	-1.16516	0.233546	0.491094	1
REACTOME_PI_3K_CASCADE	32	-1.15986	0.260154	0.502185	1
REACTOME_RECRUITMENT_OF_MITOTIC_CENTROSOME_PROTEINS_AND_COMPLEXES	38	-1.15923	0.252438	0.500933	1
REACTOME_CIRCADIAN_REPRESSION_OF_EXPRESSION_BY_REV_ERBA	15	-1.15823	0.283133	0.500704	1
REACTOME_DIABETES_PATHWAYS	78	-1.15822	0.212897	0.497811	1
REACTOME_CLEAVAGE_OF_GROWING_TRANSCRIPT_IN_THE_TERMINATION_REGION_	23	-1.15694	0.26575	0.498254	1
REACTOME_PI3K_EVENTS_IN_ERBB2_SIGNALING	27	-1.15394	0.279476	0.503157	1
REACTOME_GENERIC_TRANSCRIPTION_PATHWAY	84	-1.15129	0.213415	0.507388	1
REACTOME_LAGGING_STRAND_SYNTHESIS	15	-1.15116	0.305489	0.504878	1
REACTOME_REGULATION_OF_MRNA_STABILITY_BY_PROTEINS_THAT_BIND_AU_RICH_ELEMENTS	47	-1.14074	0.283473	0.52928	1
REACTOME_GLUCOSE_METABOLISM	39	-1.13975	0.28312	0.529002	1
REACTOME_ENOS_ACTIVATION_AND_REGULATION	17	-1.1397	0.325088	0.526202	1
REACTOME_NOD1_2_SIGNALING_PATHWAY	18	-1.1373	0.301624	0.52962	1
REACTOME_OPIOID_SIGNALLING	62	-1.13711	0.258763	0.527083	1
REACTOME_METABOLISM_OF_RNA	136	-1.13536	0.205205	0.528789	1
REACTOME_SIGNALING_BY_PDGF	95	-1.13521	0.240854	0.526329	1
REACTOME_ER_PHAGOSOME_PATHWAY	27	-1.1334	0.316428	0.528448	1
REACTOME_SIGNALING_BY_TGF_BETA_RECEPTOR_COMPLEX	45	-1.13338	0.292812	0.52563	1
REACTOME_ION_TRANSPORT_BY_P_TYPE_ATPASES	21	-1.13316	0.316201	0.523314	1
REACTOME_LIPID_DIGESTION_MOBILIZATION_AND_TRANSPORT	26	-1.13011	0.308807	0.529072	1
REACTOME_REGULATION_OF_WATER_BALANCE_BY_RENAL_AQUAPORINS	34	-1.12885	0.298826	0.529499	1
REACTOME_RIG_I_MDA5_MEDIATED_INDUCTION_OF_IFN_ALPHA_BETA_PATHWAYS	35	-1.12356	0.313704	0.540245	1
REACTOME_REGULATION_OF_APOPTOSIS	32	-1.12249	0.323593	0.540166	1
REACTOME_EXTENSION_OF_TELOMERES	17	-1.11784	0.316667	0.549693	1
REACTOME_INTERACTIONS_OF_VPR_WITH_HOST_CELLULAR_PROTEINS	23	-1.11537	0.325315	0.55328	1
REACTOME_INTRINSIC_PATHWAY_FOR_APOPTOSIS	20	-1.1145	0.348677	0.55264	1
REACTOME_TRANSCRIPTIONAL_ACTIVITY_OF_SMAD2_SMAD3_SMAD4_HETEROTRIMER	26	-1.11294	0.348634	0.553891	1
REACTOME_G1_PHASE	22	-1.10648	0.342045	0.568037	1
REACTOME_ADP_SIGNALLING_THROUGH_P2RY12	18	-1.10381	0.361628	0.572045	1
REACTOME_RORA_ACTIVATES_CIRCADIAN_EXPRESSION	16	-1.10117	0.366467	0.576114	1
REACTOME_AQUAPORIN_MEDIATED_TRANSPORT	36	-1.09915	0.340173	0.578419	1
REACTOME_INWARDLY_RECTIFYING_K_CHANNELS	24	-1.09391	0.348917	0.589216	1
REACTOME_CDT1_ASSOCIATION_WITH_THE_CDC6_ORC_ORIGIN_COMPLEX	24	-1.09372	0.363737	0.586751	1
REACTOME_INHIBITION_OF_INSULIN_SECRETION_BY_ADRENALINE_NORADRENALINE	22	-1.09288	0.370413	0.586118	1
REACTOME_AUTODEGRADATION_OF_CDH1_BY_CDH1_APC_C	30	-1.08901	0.37037	0.592955	1
REACTOME_ADHERENS_JUNCTIONS_INTERACTIONS	19	-1.08806	0.364176	0.5926	1
REACTOME_TRNA_AMINOACYLATION	16	-1.08733	0.369488	0.591584	1
REACTOME_DEPOSITION_OF_NEW_CENPA_CONTAINING_NUCLEOSOMES_AT_THE_CENTROMERE	15	-1.08447	0.372236	0.59568	1
REACTOME_ANTIGEN_PROCESSING_CROSS_PRESENTATION	34	-1.08337	0.365011	0.59572	1
REACTOME_ACTIVATION_OF_ATR_IN_RESPONSE_TO_REPLICATION_STRESS	18	-1.07777	0.384884	0.607246	1
REACTOME_CELL_SURFACE_INTERACTIONS_AT_THE_VASCULAR_WALL	54	-1.06944	0.374607	0.626006	1
REACTOME_PLATELET_HOMEOSTASIS	54	-1.06733	0.378914	0.628472	1
REACTOME_DNA_STRAND_ELONGATION	21	-1.06456	0.424138	0.632563	1
REACTOME_MEIOTIC_RECOMBINATION	21	-1.06033	0.422811	0.64045	1
REACTOME_FATTY_ACID_TRIACYLGLYCEROL_AND_KETONE_BODY_METABOLISM	95	-1.06025	0.357215	0.637728	1
REACTOME_CELL_CYCLE_MITOTIC	179	-1.059	0.351	0.637826	1
REACTOME_MITOCHONDRIAL_PROTEIN_IMPORT	26	-1.05884	0.415642	0.635223	1
REACTOME_VIF_MEDIATED_DEGRADATION_OF_APOBEC3G	24	-1.05878	0.40273	0.632469	1
REACTOME_METABOLISM_OF_MRNA	111	-1.058	0.369739	0.631485	1
REACTOME_MRNA_SPLICING_MINOR_PATHWAY	18	-1.05049	0.427732	0.647568	1
REACTOME_NITRIC_OXIDE_STIMULATES_GUANYLATE_CYCLASE	16	-1.04843	0.439675	0.649799	1
REACTOME_DNA_REPAIR	66	-1.04595	0.402878	0.652863	1
REACTOME_NUCLEOTIDE_BINDING_DOMAIN_LEUCINE_RICH_REPEAT_CONTAINING_RECEPTOR_NLR_SIGNALING_PATHWAYS	26	-1.04471	0.445676	0.653076	1
REACTOME_TCR_SIGNALING	33	-1.0424	0.438326	0.656038	1
REACTOME_METABOLISM_OF_AMINO_ACIDS_AND_DERIVATIVES	106	-1.04188	0.428138	0.654366	1
REACTOME_SCF_BETA_TRCP_MEDIATED_DEGRADATION_OF_EMI1	25	-1.03203	0.463442	0.67666	1
REACTOME_G2_M_CHECKPOINTS	22	-1.03114	0.438073	0.675818	1
REACTOME_TELOMERE_MAINTENANCE	25	-1.0307	0.440678	0.673892	1
REACTOME_REGULATION_OF_ORNITHINE_DECARBOXYLASE_ODC	25	-1.02988	0.447778	0.672823	1
REACTOME_CELL_CELL_JUNCTION_ORGANIZATION	35	-1.02857	0.44697	0.673153	1
REACTOME_SIGNALING_BY_NOTCH	70	-1.02204	0.459817	0.685987	1
REACTOME_METAL_ION_SLC_TRANSPORTERS	16	-1.0218	0.469121	0.683625	1
REACTOME_S_PHASE	63	-1.02111	0.452577	0.682345	1
REACTOME_PRE_NOTCH_EXPRESSION_AND_PROCESSING	29	-1.02052	0.450111	0.680797	1
REACTOME_SIGNALING_BY_RHO_GTPASES	80	-1.02027	0.46999	0.678453	1
REACTOME_CELL_JUNCTION_ORGANIZATION	51	-1.01826	0.477581	0.680396	1
REACTOME_CELL_CYCLE	209	-1.01458	0.479	0.686484	1
REACTOME_CDK_MEDIATED_PHOSPHORYLATION_AND_REMOVAL_OF_CDC6	21	-1.00706	0.501144	0.70137	1
REACTOME_MITOTIC_G1_G1_S_PHASES	72	-1.00365	0.519309	0.706287	1
REACTOME_TRANSMEMBRANE_TRANSPORT_OF_SMALL_MOLECULES	255	-1.00349	0.494	0.703635	1
REACTOME_CHONDROITIN_SULFATE_DERMATAN_SULFATE_METABOLISM	22	-0.99494	0.516018	0.721083	1
REACTOME_APC_C_CDC20_MEDIATED_DEGRADATION_OF_MITOTIC_PROTEINS	35	-0.988853	0.5141	0.732222	1
REACTOME_NOTCH1_INTRACELLULAR_DOMAIN_REGULATES_TRANSCRIPTION	26	-0.985621	0.513393	0.736913	1
REACTOME_NCAM_SIGNALING_FOR_NEURITE_OUT_GROWTH	45	-0.984553	0.540254	0.736341	1
REACTOME_RAS_ACTIVATION_UOPN_CA2_INFUX_THROUGH_NMDA_RECEPTOR	15	-0.982286	0.519417	0.738122	1
REACTOME_METABOLISM_OF_NUCLEOTIDES	50	-0.97915	0.552332	0.742417	1
REACTOME_SIGNALING_BY_WNT	34	-0.977382	0.523446	0.743341	1
REACTOME_PROCESSING_OF_CAPPED_INTRON_CONTAINING_PRE_MRNA	69	-0.973446	0.551795	0.748884	1
REACTOME_AUTODEGRADATION_OF_THE_E3_UBIQUITIN_LIGASE_COP1	23	-0.973325	0.524336	0.746134	1
REACTOME_RESPONSE_TO_ELEVATED_PLATELET_CYTOSOLIC_CA2_	46	-0.973258	0.538624	0.743241	1
REACTOME_REGULATION_OF_MITOTIC_CELL_CYCLE	41	-0.968084	0.551872	0.751713	1
REACTOME_DESTABILIZATION_OF_MRNA_BY_AUF1_HNRNP_D0	26	-0.961742	0.555307	0.762742	1
REACTOME_G_ALPHA_Z_SIGNALLING_EVENTS	37	-0.95993	0.539205	0.763764	1
REACTOME_CYCLIN_E_ASSOCIATED_EVENTS_DURING_G1_S_TRANSITION_	35	-0.955454	0.563441	0.770518	1
REACTOME_ABC_FAMILY_PROTEINS_MEDIATED_TRANSPORT	18	-0.953564	0.549654	0.771559	1
REACTOME_BMAL1_CLOCK_NPAS2_ACTIVATES_CIRCADIAN_EXPRESSION	25	-0.951382	0.560674	0.773229	1
REACTOME_ACTIVATION_OF_NF_KAPPAB_IN_B_CELLS	33	-0.951176	0.585837	0.770641	1
REACTOME_MITOTIC_PROMETAPHASE	48	-0.949141	0.58421	0.771743	1
REACTOME_SYNTHESIS_OF_DNA	49	-0.947108	0.610063	0.773075	1
REACTOME_APC_C_CDH1_MEDIATED_DEGRADATION_OF_CDC20_AND_OTHER_APC_C_CDH1_TARGETED_PROTEINS_IN_LATE_MITOSIS_EARLY_G1	35	-0.946102	0.578431	0.772232	1
REACTOME_GASTRIN_CREB_SIGNALLING_PATHWAY_VIA_PKC_AND_MAPK	116	-0.945498	0.632323	0.770553	1
REACTOME_MRNA_SPLICING	48	-0.944687	0.58142	0.769265	1
REACTOME_P53_INDEPENDENT_G1_S_DNA_DAMAGE_CHECKPOINT	25	-0.944008	0.570136	0.767593	1
REACTOME_NUCLEAR_RECEPTOR_TRANSCRIPTION_PATHWAY	31	-0.942782	0.574445	0.76708	1
REACTOME_INTEGRIN_CELL_SURFACE_INTERACTIONS	59	-0.935196	0.623578	0.779617	1
REACTOME_CELL_DEATH_SIGNALLING_VIA_NRAGE_NRIF_AND_NADE	49	-0.93221	0.610822	0.782886	1
REACTOME_NETRIN1_SIGNALING	31	-0.928661	0.600858	0.78685	1
REACTOME_NRAGE_SIGNALS_DEATH_THROUGH_JNK	37	-0.925714	0.630388	0.789549	1
REACTOME_TRANSLATION	68	-0.91669	0.653333	0.804684	1
REACTOME_PPARA_ACTIVATES_GENE_EXPRESSION	54	-0.91592	0.670502	0.803262	1
REACTOME_SIGNALING_BY_GPCR	323	-0.912981	0.782	0.806024	1
REACTOME_SIGNALING_BY_NOTCH1	45	-0.912605	0.638743	0.803807	1
REACTOME_G_BETA_GAMMA_SIGNALLING_THROUGH_PLC_BETA	16	-0.910608	0.617506	0.804472	1
REACTOME_P53_DEPENDENT_G1_DNA_DAMAGE_RESPONSE	28	-0.908634	0.642699	0.805168	1
REACTOME_TRANSPORT_OF_MATURE_MRNA_DERIVED_FROM_AN_INTRONLESS_TRANSCRIPT	23	-0.907269	0.629834	0.804688	1
REACTOME_MEIOSIS	40	-0.904442	0.652361	0.806791	1
REACTOME_GPCR_DOWNSTREAM_SIGNALING	250	-0.903543	0.768	0.805527	1
REACTOME_CELL_CYCLE_CHECKPOINTS	62	-0.903336	0.661523	0.802954	1
REACTOME_MRNA_3_END_PROCESSING	18	-0.900393	0.622248	0.805451	1
REACTOME_REGULATION_OF_GLUCOKINASE_BY_GLUCOKINASE_REGULATORY_PROTEIN	18	-0.88896	0.640625	0.823264	1
REACTOME_GLUCAGON_TYPE_LIGAND_RECEPTORS	21	-0.888729	0.66092	0.82064	1
REACTOME_BASIGIN_INTERACTIONS	17	-0.882736	0.643948	0.828121	1
REACTOME_CHROMOSOME_MAINTENANCE	52	-0.878825	0.695652	0.83166	1
REACTOME_PROSTACYCLIN_SIGNALLING_THROUGH_PROSTACYCLIN_RECEPTOR	15	-0.876316	0.659091	0.833002	1
REACTOME_ACTIVATION_OF_THE_PRE_REPLICATIVE_COMPLEX	16	-0.87392	0.656663	0.834029	1
REACTOME_G_PROTEIN_ACTIVATION	21	-0.871884	0.666667	0.834488	1
REACTOME_DOWNSTREAM_TCR_SIGNALING	19	-0.87093	0.684332	0.833104	1
REACTOME_CHOLESTEROL_BIOSYNTHESIS	17	-0.869769	0.666667	0.83198	1
REACTOME_NUCLEAR_SIGNALING_BY_ERBB4	25	-0.856513	0.688562	0.850758	1
REACTOME_TRANSPORT_OF_MATURE_TRANSCRIPT_TO_CYTOPLASM	33	-0.856301	0.722826	0.848109	1
REACTOME_BASE_EXCISION_REPAIR	16	-0.856228	0.683014	0.845282	1
REACTOME_MYOGENESIS	18	-0.854062	0.681499	0.845674	1
REACTOME_GLUCOSE_TRANSPORT	25	-0.85189	0.710963	0.846198	1
REACTOME_INFLUENZA_LIFE_CYCLE	71	-0.850198	0.755374	0.84603	1
REACTOME_ACTIVATION_OF_THE_MRNA_UPON_BINDING_OF_THE_CAP_BINDING_COMPLEX_AND_EIFS_AND_SUBSEQUENT_BINDING_TO_43S	24	-0.848775	0.722408	0.845332	1
REACTOME_M_G1_TRANSITION	40	-0.847843	0.731992	0.843823	1
REACTOME_TRANSCRIPTIONAL_REGULATION_OF_WHITE_ADIPOCYTE_DIFFERENTIATION	31	-0.844273	0.727571	0.846362	1
REACTOME_DNA_REPLICATION	103	-0.838724	0.809717	0.85168	1
REACTOME_ACTIVATED_NOTCH1_TRANSMITS_SIGNAL_TO_THE_NUCLEUS	19	-0.834574	0.734104	0.85497	1
REACTOME_ORC1_REMOVAL_FROM_CHROMATIN	32	-0.834475	0.735071	0.852294	1
REACTOME_ASSEMBLY_OF_THE_PRE_REPLICATIVE_COMPLEX	31	-0.832117	0.727571	0.852935	1
REACTOME_G1_S_TRANSITION	57	-0.828571	0.774193	0.85525	1
REACTOME_G_ALPHA_Q_SIGNALLING_EVENTS	99	-0.82777	0.807071	0.853631	1
REACTOME_NEP_NS2_INTERACTS_WITH_THE_CELLULAR_EXPORT_MACHINERY	20	-0.827572	0.713464	0.851086	1
REACTOME_G_ALPHA_I_SIGNALLING_EVENTS	90	-0.823591	0.830972	0.85379	1
REACTOME_LIPOPROTEIN_METABOLISM	15	-0.81799	0.718938	0.858557	1
REACTOME_MITOTIC_M_M_G1_PHASES	90	-0.812204	0.818365	0.863736	1
REACTOME_TRANSPORT_OF_VITAMINS_NUCLEOSIDES_AND_RELATED_MOLECULES	19	-0.809979	0.761737	0.863835	1
REACTOME_ACTIVATION_OF_KAINATE_RECEPTORS_UPON_GLUTAMATE_BINDING	24	-0.809174	0.750284	0.862057	1
REACTOME_SRP_DEPENDENT_COTRANSLATIONAL_PROTEIN_TARGETING_TO_MEMBRANE	51	-0.809075	0.809024	0.859379	1
REACTOME_TIGHT_JUNCTION_INTERACTIONS	16	-0.807292	0.747608	0.858874	1
REACTOME_IRON_UPTAKE_AND_TRANSPORT	17	-0.804183	0.752941	0.86013	1
REACTOME_P75_NTR_RECEPTOR_MEDIATED_SIGNALLING	64	-0.790308	0.82582	0.874649	1
REACTOME_SCFSKP2_MEDIATED_DEGRADATION_OF_P27_P21	28	-0.781288	0.78208	0.882857	1
REACTOME_CROSS_PRESENTATION_OF_SOLUBLE_EXOGENOUS_ANTIGENS_ENDOSOMES	23	-0.775374	0.795941	0.886974	1
REACTOME_SMAD2_SMAD3_SMAD4_HETEROTRIMER_REGULATES_TRANSCRIPTION	17	-0.746192	0.786295	0.916682	1
REACTOME_AMINO_ACID_AND_OLIGOPEPTIDE_SLC_TRANSPORTERS	31	-0.742459	0.847495	0.917647	1
REACTOME_3_UTR_MEDIATED_TRANSLATIONAL_REGULATION	42	-0.733325	0.867521	0.924299	1
REACTOME_INTERFERON_GAMMA_SIGNALING	30	-0.727285	0.85226	0.927647	1
REACTOME_SLC_MEDIATED_TRANSMEMBRANE_TRANSPORT	151	-0.727145	0.954819	0.924857	1
REACTOME_SMOOTH_MUSCLE_CONTRACTION	17	-0.718463	0.84434	0.930308	1
REACTOME_DOUBLE_STRAND_BREAK_REPAIR	15	-0.716622	0.844391	0.929099	1
REACTOME_APOPTOTIC_CLEAVAGE_OF_CELLULAR_PROTEINS	30	-0.715659	0.854486	0.927058	1
REACTOME_RESPIRATORY_ELECTRON_TRANSPORT_ATP_SYNTHESIS_BY_CHEMIOSMOTIC_COUPLING_AND_HEAT_PRODUCTION_BY_UNCOUPLING_PROTEINS_	30	-0.699646	0.893923	0.938907	1
REACTOME_RESPIRATORY_ELECTRON_TRANSPORT	24	-0.695385	0.871397	0.93966	1
REACTOME_NEPHRIN_INTERACTIONS	15	-0.690887	0.860943	0.940614	1
REACTOME_TRANSPORT_OF_INORGANIC_CATIONS_ANIONS_AND_AMINO_ACIDS_OLIGOPEPTIDES	59	-0.674982	0.934715	0.950772	1
REACTOME_PRE_NOTCH_TRANSCRIPTION_AND_TRANSLATION	19	-0.67455	0.88	0.948186	1
REACTOME_SEMA4D_INDUCED_CELL_MIGRATION_AND_GROWTH_CONE_COLLAPSE	18	-0.673207	0.872162	0.946186	1
REACTOME_GROWTH_HORMONE_RECEPTOR_SIGNALING	17	-0.663959	0.884288	0.949998	1
REACTOME_REGULATORY_RNA_PATHWAYS	18	-0.659883	0.915976	0.949997	1
REACTOME_YAP1_AND_WWTR1_TAZ_STIMULATED_GENE_EXPRESSION	15	-0.659817	0.899633	0.947156	1
REACTOME_PHASE_II_CONJUGATION	27	-0.659787	0.905286	0.944299	1
REACTOME_TRANSPORT_OF_GLUCOSE_AND_OTHER_SUGARS_BILE_SALTS_AND_ORGANIC_ACIDS_METAL_IONS_AND_AMINE_COMPOUNDS	53	-0.638688	0.944906	0.955709	1
REACTOME_PURINE_METABOLISM	26	-0.63794	0.937294	0.95335	1
REACTOME_PYRUVATE_METABOLISM_AND_CITRIC_ACID_TCA_CYCLE	23	-0.635851	0.905085	0.951831	1
REACTOME_TCA_CYCLE_AND_RESPIRATORY_ELECTRON_TRANSPORT	52	-0.635386	0.949843	0.949195	1
REACTOME_BIOLOGICAL_OXIDATIONS	52	-0.610888	0.962264	0.960442	1
REACTOME_NONSENSE_MEDIATED_DECAY_ENHANCED_BY_THE_EXON_JUNCTION_COMPLEX	48	-0.571974	0.977964	0.975612	1
REACTOME_INFLUENZA_VIRAL_RNA_TRANSCRIPTION_AND_REPLICATION	45	-0.511271	0.986155	0.990792	1
REACTOME_PHASE1_FUNCTIONALIZATION_OF_COMPOUNDS	25	-0.431034	0.996648	0.997633	1

## Sheet: GSEA_KEGG_CM18_down
NAME	SIZE	NES	NOM p-val	FDR q-val	FWER p-val
KEGG_SNARE_INTERACTIONS_IN_VESICULAR_TRANSPORT	24	-1.73246	0	0.0625614	0.063
KEGG_MTOR_SIGNALING_PATHWAY	38	-1.72594	0.0010661	0.0357192	0.072
KEGG_PROGESTERONE_MEDIATED_OOCYTE_MATURATION	66	-1.71476	0	0.0306672	0.093
KEGG_NEUROTROPHIN_SIGNALING_PATHWAY	102	-1.68532	0	0.0390899	0.154
KEGG_ENDOCYTOSIS	114	-1.6477	0	0.0565699	0.256
KEGG_ALANINE_ASPARTATE_AND_GLUTAMATE_METABOLISM	22	-1.58144	0.0102157	0.117919	0.524
KEGG_ENDOMETRIAL_CANCER	41	-1.5567	0.00539374	0.137558	0.644
KEGG_GAP_JUNCTION	57	-1.55575	0.00416233	0.121721	0.649
KEGG_COLORECTAL_CANCER	53	-1.54001	0.00417101	0.130355	0.723
KEGG_ERBB_SIGNALING_PATHWAY	68	-1.53981	0.00307377	0.11761	0.723
KEGG_SPHINGOLIPID_METABOLISM	23	-1.52932	0.0227273	0.121687	0.766
KEGG_LONG_TERM_DEPRESSION	51	-1.52418	0.0083682	0.118469	0.785
KEGG_PENTOSE_PHOSPHATE_PATHWAY	15	-1.50683	0.028136	0.13529	0.85
KEGG_RENAL_CELL_CARCINOMA	57	-1.50438	0.0114345	0.129562	0.859
KEGG_PANCREATIC_CANCER	58	-1.5016	0.00725389	0.124661	0.871
KEGG_GLYCEROPHOSPHOLIPID_METABOLISM	47	-1.4975	0.012487	0.122932	0.885
KEGG_LONG_TERM_POTENTIATION	55	-1.49277	0.0103842	0.122157	0.898
KEGG_THYROID_CANCER	24	-1.45765	0.0361582	0.167741	0.962
KEGG_UBIQUITIN_MEDIATED_PROTEOLYSIS	96	-1.45648	0.0061665	0.161337	0.962
KEGG_GLIOMA	52	-1.44997	0.0229406	0.162383	0.968
KEGG_VIBRIO_CHOLERAE_INFECTION	32	-1.43844	0.0290011	0.175192	0.98
KEGG_ARRHYTHMOGENIC_RIGHT_VENTRICULAR_CARDIOMYOPATHY_ARVC	55	-1.43711	0.0248963	0.169279	0.981
KEGG_CHEMOKINE_SIGNALING_PATHWAY	116	-1.43229	0.00100503	0.170875	0.984
KEGG_NUCLEOTIDE_EXCISION_REPAIR	29	-1.43173	0.0391061	0.164858	0.985
KEGG_INSULIN_SIGNALING_PATHWAY	103	-1.43017	0.0150754	0.160852	0.987
KEGG_MAPK_SIGNALING_PATHWAY	198	-1.42714	0	0.159458	0.989
KEGG_CYSTEINE_AND_METHIONINE_METABOLISM	21	-1.4269	0.0515464	0.15399	0.989
KEGG_MELANOMA	52	-1.42668	0.0241597	0.14898	0.989
KEGG_LYSOSOME	76	-1.42231	0.0133607	0.149941	0.992
KEGG_GLYCOSAMINOGLYCAN_BIOSYNTHESIS_HEPARAN_SULFATE	17	-1.40731	0.0650888	0.166969	0.994
KEGG_CHRONIC_MYELOID_LEUKEMIA	63	-1.3992	0.017562	0.174312	0.995
KEGG_NON_SMALL_CELL_LUNG_CANCER	42	-1.3985	0.0470588	0.169847	0.995
KEGG_OOCYTE_MEIOSIS	76	-1.39836	0.0172589	0.164939	0.995
KEGG_PYRIMIDINE_METABOLISM	66	-1.38431	0.0184615	0.182726	0.997
KEGG_APOPTOSIS	50	-1.37303	0.0429769	0.196741	1
KEGG_BLADDER_CANCER	30	-1.36501	0.0737885	0.204881	1
KEGG_OLFACTORY_TRANSDUCTION	19	-1.36126	0.0834313	0.205916	1
KEGG_VASOPRESSIN_REGULATED_WATER_REABSORPTION	31	-1.35687	0.0875831	0.208126	1
KEGG_GLYCOSPHINGOLIPID_BIOSYNTHESIS_LACTO_AND_NEOLACTO_SERIES	15	-1.35528	0.0793269	0.205995	1
KEGG_FC_EPSILON_RI_SIGNALING_PATHWAY	55	-1.35324	0.0591286	0.204452	1
KEGG_T_CELL_RECEPTOR_SIGNALING_PATHWAY	75	-1.35085	0.0408998	0.204119	1
KEGG_VASCULAR_SMOOTH_MUSCLE_CONTRACTION	77	-1.3486	0.0408998	0.203027	1
KEGG_FC_GAMMA_R_MEDIATED_PHAGOCYTOSIS	77	-1.34611	0.035533	0.202372	1
KEGG_PHOSPHATIDYLINOSITOL_SIGNALING_SYSTEM	55	-1.30823	0.077325	0.269378	1
KEGG_REGULATION_OF_ACTIN_CYTOSKELETON	153	-1.30205	0.032	0.27575	1
KEGG_ACUTE_MYELOID_LEUKEMIA	47	-1.29207	0.102833	0.289882	1
KEGG_N_GLYCAN_BIOSYNTHESIS	30	-1.26206	0.149512	0.354834	1
KEGG_PARKINSONS_DISEASE	53	-1.25978	0.126556	0.353008	1
KEGG_EPITHELIAL_CELL_SIGNALING_IN_HELICOBACTER_PYLORI_INFECTION	43	-1.25409	0.132984	0.359731	1
KEGG_RNA_POLYMERASE	17	-1.24671	0.177671	0.370741	1
KEGG_ADHERENS_JUNCTION	60	-1.24271	0.13381	0.373677	1
KEGG_NATURAL_KILLER_CELL_MEDIATED_CYTOTOXICITY	58	-1.24006	0.135802	0.372986	1
KEGG_TOLL_LIKE_RECEPTOR_SIGNALING_PATHWAY	56	-1.23831	0.14256	0.370836	1
KEGG_REGULATION_OF_AUTOPHAGY	17	-1.22861	0.193662	0.387173	1
KEGG_VEGF_SIGNALING_PATHWAY	48	-1.22177	0.165787	0.396535	1
KEGG_JAK_STAT_SIGNALING_PATHWAY	77	-1.22094	0.14096	0.391533	1
KEGG_GLYCOLYSIS_GLUCONEOGENESIS	29	-1.21493	0.186788	0.399494	1
KEGG_LEISHMANIA_INFECTION	34	-1.20549	0.201735	0.416804	1
KEGG_PROSTATE_CANCER	69	-1.20494	0.164286	0.411207	1
KEGG_TASTE_TRANSDUCTION	19	-1.20429	0.239814	0.406049	1
KEGG_RIG_I_LIKE_RECEPTOR_SIGNALING_PATHWAY	37	-1.20242	0.19334	0.403919	1
KEGG_FOCAL_ADHESION	150	-1.1983	0.0970971	0.407624	1
KEGG_GNRH_SIGNALING_PATHWAY	71	-1.19331	0.164959	0.413334	1
KEGG_PATHWAYS_IN_CANCER	238	-1.18796	0.079	0.420282	1
KEGG_GLYCEROLIPID_METABOLISM	31	-1.18492	0.248879	0.421606	1
KEGG_TGF_BETA_SIGNALING_PATHWAY	58	-1.17326	0.214286	0.445304	1
KEGG_AXON_GUIDANCE	108	-1.17033	0.176411	0.445279	1
KEGG_CARDIAC_MUSCLE_CONTRACTION	46	-1.16699	0.231343	0.447213	1
KEGG_DNA_REPLICATION	27	-1.16375	0.279955	0.448703	1
KEGG_BUTANOATE_METABOLISM	19	-1.1515	0.294253	0.473168	1
KEGG_NOD_LIKE_RECEPTOR_SIGNALING_PATHWAY	30	-1.13971	0.295011	0.497469	1
KEGG_ALDOSTERONE_REGULATED_SODIUM_REABSORPTION	29	-1.13232	0.310458	0.508551	1
KEGG_SMALL_CELL_LUNG_CANCER	68	-1.13168	0.284103	0.503301	1
KEGG_HOMOLOGOUS_RECOMBINATION	16	-1.12766	0.317308	0.506486	1
KEGG_RNA_DEGRADATION	32	-1.12447	0.308271	0.507391	1
KEGG_MELANOGENESIS	68	-1.1194	0.28	0.513595	1
KEGG_DILATED_CARDIOMYOPATHY	67	-1.11432	0.297131	0.51871	1
KEGG_TYPE_II_DIABETES_MELLITUS	34	-1.11207	0.32753	0.517446	1
KEGG_WNT_SIGNALING_PATHWAY	109	-1.10711	0.286579	0.523823	1
KEGG_NEUROACTIVE_LIGAND_RECEPTOR_INTERACTION	143	-1.09643	0.287575	0.542985	1
KEGG_ABC_TRANSPORTERS	26	-1.09305	0.35906	0.54513	1
KEGG_O_GLYCAN_BIOSYNTHESIS	16	-1.08886	0.375451	0.549252	1
KEGG_MISMATCH_REPAIR	17	-1.0883	0.37338	0.54411	1
KEGG_GALACTOSE_METABOLISM	16	-1.08086	0.387366	0.555669	1
KEGG_TYROSINE_METABOLISM	18	-1.077	0.407756	0.558008	1
KEGG_PRION_DISEASES	22	-1.07246	0.409707	0.563316	1
KEGG_B_CELL_RECEPTOR_SIGNALING_PATHWAY	57	-1.05347	0.39375	0.602393	1
KEGG_CELL_CYCLE	84	-1.04356	0.432323	0.620131	1
KEGG_PROTEASOME	20	-1.03226	0.449594	0.640607	1
KEGG_ARGININE_AND_PROLINE_METABOLISM	36	-1.02117	0.469388	0.661232	1
KEGG_ADIPOCYTOKINE_SIGNALING_PATHWAY	51	-1.008	0.487474	0.684122	1
KEGG_ETHER_LIPID_METABOLISM	19	-1.00782	0.484849	0.677197	1
KEGG_FRUCTOSE_AND_MANNOSE_METABOLISM	21	-1.004	0.488426	0.678964	1
KEGG_ALZHEIMERS_DISEASE	85	-1.00208	0.510121	0.675928	1
KEGG_HYPERTROPHIC_CARDIOMYOPATHY_HCM	61	-0.99614	0.5	0.682313	1
KEGG_TIGHT_JUNCTION	83	-0.985467	0.533673	0.698476	1
KEGG_HUNTINGTONS_DISEASE	86	-0.984325	0.544162	0.693592	1
KEGG_AMINO_SUGAR_AND_NUCLEOTIDE_SUGAR_METABOLISM	29	-0.974289	0.532311	0.708343	1
KEGG_HEDGEHOG_SIGNALING_PATHWAY	43	-0.970979	0.552239	0.708076	1
KEGG_AMYOTROPHIC_LATERAL_SCLEROSIS_ALS	36	-0.969414	0.539459	0.704199	1
KEGG_HISTIDINE_METABOLISM	17	-0.969167	0.527059	0.697777	1
KEGG_LEUKOCYTE_TRANSENDOTHELIAL_MIGRATION	78	-0.967789	0.582564	0.693833	1
KEGG_PEROXISOME	43	-0.967516	0.55794	0.687527	1
KEGG_CALCIUM_SIGNALING_PATHWAY	121	-0.954146	0.606855	0.707516	1
KEGG_PPAR_SIGNALING_PATHWAY	35	-0.953038	0.560557	0.703097	1
KEGG_PURINE_METABOLISM	109	-0.93109	0.650602	0.73908	1
KEGG_STARCH_AND_SUCROSE_METABOLISM	18	-0.918909	0.614201	0.75533	1
KEGG_INOSITOL_PHOSPHATE_METABOLISM	36	-0.917764	0.617068	0.750597	1
KEGG_CYTOSOLIC_DNA_SENSING_PATHWAY	23	-0.910693	0.613303	0.756876	1
KEGG_LYSINE_DEGRADATION	34	-0.910127	0.638646	0.751047	1
KEGG_PYRUVATE_METABOLISM	23	-0.90638	0.628062	0.750791	1
KEGG_OXIDATIVE_PHOSPHORYLATION	47	-0.885769	0.699152	0.779966	1
KEGG_DORSO_VENTRAL_AXIS_FORMATION	17	-0.885695	0.656471	0.773175	1
KEGG_FATTY_ACID_METABOLISM	25	-0.881013	0.677201	0.774151	1
KEGG_CELL_ADHESION_MOLECULES_CAMS	71	-0.878474	0.732252	0.771685	1
KEGG_PATHOGENIC_ESCHERICHIA_COLI_INFECTION	37	-0.878445	0.682112	0.765067	1
KEGG_GLYCINE_SERINE_AND_THREONINE_METABOLISM	18	-0.844646	0.694186	0.811128	1
KEGG_SYSTEMIC_LUPUS_ERYTHEMATOSUS	31	-0.816099	0.743169	0.844497	1
KEGG_NOTCH_SIGNALING_PATHWAY	29	-0.814868	0.755034	0.83914	1
KEGG_ANTIGEN_PROCESSING_AND_PRESENTATION	27	-0.813278	0.767338	0.834178	1
KEGG_P53_SIGNALING_PATHWAY	44	-0.797593	0.795309	0.847283	1
KEGG_GLUTATHIONE_METABOLISM	33	-0.788071	0.793668	0.851967	1
KEGG_ECM_RECEPTOR_INTERACTION	58	-0.730267	0.88049	0.907106	1
KEGG_NICOTINATE_AND_NICOTINAMIDE_METABOLISM	15	-0.670359	0.876364	0.949885	1
KEGG_CYTOKINE_CYTOKINE_RECEPTOR_INTERACTION	89	-0.573359	0.98583	0.995949	1
KEGG_INTESTINAL_IMMUNE_NETWORK_FOR_IGA_PRODUCTION	15	-0.569759	0.964115	0.989453	1
KEGG_DRUG_METABOLISM_OTHER_ENZYMES	15	-0.525816	0.972422	0.994772	1
KEGG_BASE_EXCISION_REPAIR	27	-0.512477	0.993296	0.989869	1

[truncated: 2 more sheets: GSEA_Reactome_CM18_up, GSEA_KEGG_CM18_up]
